# Supplementary material for: Drosulfakinin signaling encodes early-life memory for adaptive social plasticity
Source: bioRxiv preprint, doi:10.1101/2024.04.08.588562, version 1 (2024-04-11)
Supplement: Dataset S2 [file 588562_file09.xlsx]

## Sheet: Group_VS_Isolated Total
FlyBaseID	GeneName	log2FoldChange	padj	Remark
FBgn0000003	7SLRNA:CR32864	0.97499	0.11927
FBgn0000008	a	0.179166	0.153584
FBgn0000015	Abd-B	0.112648	0.931704
FBgn0000017	Abl	0.258365	0.0543675
FBgn0000018	abo	-0.228069	0.219895
FBgn0000024	Ace	0.0511684	0.864581
FBgn0000028	acj6	0.606003	0.00508553
FBgn0000032	Acph-1	-0.117635	0.47702
FBgn0000036	nAChRalpha1	0.691293	7.34112e-05
FBgn0000037	mAChR-A	0.532772	1.33093e-06
FBgn0000038	nAChRbeta1	0.480486	0.0257337
FBgn0000039	nAChRalpha2	0.416406	0.00196795
FBgn0000042	Act5C	-0.00427494	0.965136
FBgn0000043	Act42A	0.100123	0.4667
FBgn0000044	Act57B	-0.631126	0.0412313
FBgn0035619	Alp10	4.30385	0.000303984	Group Up
FBgn0000046	Act87E	-0.614046	0.01149
FBgn0000047	Act88F	0.0686007	0.943462
FBgn0031273	CG2839	4.11114	2.70034e-06	Group Up
FBgn0035620	Alp9	3.50055	0.018387	Group Up
FBgn0036655	CG13031	3.44388	0.0130366	Group Up
FBgn0000057	adp	-0.0689917	0.437881
FBgn0000061	al	-0.623707	0.0785302
FBgn0000063	Mps1	0.755493	7.07202e-05
FBgn0000064	Ald1	-0.753126	5.02363e-10
FBgn0000071	Ama	0.274324	0.544663
FBgn0000075	amd	-0.0196645	0.959653
FBgn0000077	amx	-0.0634128	0.588344
FBgn0000078	Amy-d	-1.47492	0.0916625
FBgn0000079	Amy-p	-1.06753	0.181241
FBgn0000083	AnxB9	-0.400633	0.00135874
FBgn0000084	AnxB10	0.0674517	0.6874
FBgn0000092	dyw	0.580355	0.123335
FBgn0000097	aop	-0.193163	0.354826
FBgn0000100	RpLP0	-0.433675	0.00411546
FBgn0000108	Appl	0.367923	0.000610231
FBgn0000109	Aprt	-0.683304	3.42401e-06
FBgn0000114	bru1	-0.0950918	0.597827
FBgn0000115	Arl1	-0.0680163	0.637287
FBgn0000116	Argk1	-0.569466	1.20013e-10
FBgn0000117	arm	-0.131115	0.0949967
FBgn0000119	arr	-0.104615	0.457872
FBgn0000120	Arr1	-0.191453	0.451608
FBgn0000121	Arr2	-0.217872	0.32165
FBgn0000139	ash2	0.0192522	0.898197
FBgn0000140	asp	0.839991	0.152578
FBgn0000146	aub	0.202433	0.668067
FBgn0040629	CAH5	3.25641	0.000539805	Group Up
FBgn0000150	awd	-0.474404	0.00431712
FBgn0000152	Axs	0.080387	0.667811
FBgn0000153	b	-0.402892	0.0907996
FBgn0000157	Dll	0.02109	0.897949
FBgn0000158	bam	-1.84364	0.0938229
FBgn0000163	baz	-0.519315	1.33556e-05
FBgn0000173	ben	-0.130246	0.336498
FBgn0000179	bi	0.411496	0.00700268
FBgn0000180	bib	0.102672	0.701314
FBgn0000181	bic	-0.458496	0.000412659
FBgn0000183	BicD	-0.055109	0.706177
FBgn0003060	CG9757	3.00063	1.74867e-06	Group Up
FBgn0000212	brm	0.409271	2.75526e-16
FBgn0000221	brn	0.152558	0.448125
FBgn0000228	Nin	0.174654	0.0704344
FBgn0000229	bsk	-0.00835501	0.956309
FBgn0000233	btd	0.4593	0.014617
FBgn0000239	bur	-0.327231	0.00231031
FBgn0000241	bw	-0.755872	0.000697212
FBgn0000244	by	-0.57261	2.22367e-08
FBgn0000246	c(3)G	0.360634	0.0147292
FBgn0000247	ca	0.101557	0.443271
FBgn0000250	cact	-0.0972729	0.149984
FBgn0000251	cad	-1.04367	0.244444
FBgn0000253	Cam	-0.140467	0.33198
FBgn0000256	capu	0.328252	0.028209
FBgn0000257	car	0.186108	0.0598255
FBgn0000259	CkIIbeta	0.174526	0.0648593
FBgn0037191	CG14448	2.95644	0.00529229	Group Up
FBgn0000273	Pka-C1	0.0829922	0.768899
FBgn0043791	phu	2.91121	0.000878698	Group Up
FBgn0053127	CG33127	2.84601	0.018387	Group Up
FBgn0000278	CecB	-0.955843	0.309051
FBgn0000279	CecC	-0.549505	0.616896
FBgn0000283	Cp190	0.438765	8.8919e-08
FBgn0000286	Cf2	0.169665	0.344755
FBgn0000287	salr	0.209765	0.0756098
FBgn0000289	cg	0.384053	1.03927e-07
FBgn0000299	Col4a1	-0.789782	0.0127413
FBgn0000303	ChAT	0.374705	0.000328248
FBgn0000307	chif	0.146805	0.27421
FBgn0000308	chic	0.0914834	0.548925
FBgn0000316	cin	-0.0314918	0.787087
FBgn0000317	ck	-0.982347	1.9642e-07
FBgn0000318	cl	-0.197342	0.296955
FBgn0000319	Chc	-0.348049	0.000210869
FBgn0000320	eya	-0.707844	2.51569e-06
FBgn0000326	clt	-0.206378	0.0848571
FBgn0000330	cm	-0.182261	0.0489847
FBgn0030009	CG15336	2.84424	0.0177526	Group Up
FBgn0000339	cni	-0.459591	5.68145e-05
FBgn0000346	comt	-0.0324825	0.821358
FBgn0000351	cort	0.848725	0.0317988
FBgn0000352	cos	0.225271	0.0237816
FBgn0264373	lncRNA:CR43825	2.80404	0.0251088	Group Up
FBgn0000358	Cp19	-0.598338	0.537383
FBgn0038160	CG9759	2.74932	1.57882e-12	Group Up
FBgn0000376	crm	0.231219	0.00569876
FBgn0000377	crn	0.196898	0.0710634
FBgn0000382	csw	0.24167	0.0675477
FBgn0000384	cta	0.00292273	0.987453
FBgn0000394	cv	-0.641778	1.37691e-06
FBgn0000395	cv-2	-0.124829	0.62249
FBgn0000404	CycA	-0.244958	0.440562
FBgn0000405	CycB	-0.992874	0.065336
FBgn0037183	CG14451	2.72789	3.14565e-05	Group Up
FBgn0000411	D	0.30023	0.00161905
FBgn0000412	D1	0.521072	1.91642e-05
FBgn0000414	Dab	0.221791	0.127272
FBgn0000416	Sap-r	-0.641117	0.000499031
FBgn0000422	Ddc	0.608793	0.0252838
FBgn0000426	SmF	0.472758	0.00549011
FBgn0000439	Dfd	0.0576034	0.814485
FBgn0000442	Pkg21D	-0.704434	5.67927e-05
FBgn0000447	Dhod	-0.0235167	0.914539
FBgn0000448	Hr3	0.303572	0.484961
FBgn0000449	dib	0.826547	0.351005
FBgn0000451	ect	-0.811719	0.0211478
FBgn0000454	Dip-B	-0.503292	0.000991371
FBgn0000455	Dip-C	-0.108559	0.477782
FBgn0000459	disco	-0.343599	0.0457041
FBgn0000463	Dl	-0.39943	0.0332837
FBgn0000464	Lar	0.417501	0.0533589
FBgn0000473	Cyp6a2	-0.307618	0.781449
FBgn0035665	Jon65Aiii	2.50676	0.0350969	Group Up
FBgn0000479	dnc	0.508048	0.00723704
FBgn0000482	dor	0.0956357	0.372126
FBgn0000489	Pka-C3	0.0204511	0.956546
FBgn0000490	dpp	-0.45023	0.00279197
FBgn0000492	Dr	-0.546559	0.00810726
FBgn0000499	dsh	0.225982	0.0025116
FBgn0264710	asRNA:CR43979	2.39154	0.0481545	Group Up
FBgn0000504	dsx	-0.532598	0.00999523
FBgn0000520	dwg	0.433407	0.000150578
FBgn0000524	dx	-0.597178	0.0084641
FBgn0000527	e	-0.115347	0.850425
FBgn0000529	bsh	0.611911	1.00052e-07
FBgn0000533	ea	0.218026	0.482464
FBgn0000535	eag	0.434293	0.24324
FBgn0000536	eas	-0.712346	1.1298e-07
FBgn0000541	E(bx)	0.228159	0.0328929
FBgn0000542	ec	-0.731123	0.00930178
FBgn0000543	ecd	0.178929	0.0457324
FBgn0000546	EcR	0.0487597	0.790214
FBgn0000547	ed	-0.177285	0.210303
FBgn0000551	Edg78E	0.654808	0.03887
FBgn0000552	Edg84A	0.573397	0.322091
FBgn0000557	eEF1alpha2	-0.516213	4.37963e-05
FBgn0000559	eEF2	-0.805283	5.59479e-09
FBgn0000560	eg	-0.868087	0.0451192
FBgn0000562	egl	-0.455338	0.0017622
FBgn0000564	Eh	0.158173	0.916154
FBgn0000565	MsrA	0.167706	0.501348
FBgn0000566	Cth	-0.203106	0.24324
FBgn0000567	Eip74EF	-0.0974303	0.701314
FBgn0000568	Eip75B	0.271221	0.0358879
FBgn0000575	emc	0.0286367	0.814652
FBgn0000576	ems	-0.0253141	0.923505
FBgn0000577	en	-0.17452	0.398367
FBgn0000578	ena	0.181779	0.144629
FBgn0000579	Eno	-0.586017	2.30255e-07
FBgn0000581	E(Pc)	0.103337	0.48096
FBgn0000588	esc	0.29757	0.426409
FBgn0039251	Trf4-2	2.3781	1.51541e-05	Group Up
FBgn0000594	Est-P	-1.1729	0.187029
FBgn0000606	eve	0.438027	0.49266
FBgn0000611	exd	-0.0499634	0.753741
FBgn0030374	CG15734	2.37204	0.0124774	Group Up
FBgn0000617	Taf9	-0.104398	0.401248
FBgn0000618	e(y)2	-0.00260055	0.991652
FBgn0000625	eyg	-0.0823788	0.675512
FBgn0000629	E(z)	0.330447	2.92407e-06
FBgn0000633	tei	0.249641	0.0130112
FBgn0000635	Fas2	0.00677483	0.965136
FBgn0000636	Fas3	-0.192203	0.206768
FBgn0000639	Fbp1	0.502975	0.461356
FBgn0000640	Fbp2	-0.626808	0.609495
FBgn0000644	Fcp3C	0.307887	0.406871
FBgn0000658	fj	-0.763669	0.0600052
FBgn0000659	fkh	0.39326	0.00718439
FBgn0000662	fl(2)d	0.431609	1.91813e-09
FBgn0000667	Actn	-0.507068	0.0028048
FBgn0000709	fliI	0.197211	0.0651301
FBgn0000711	flw	-0.0154011	0.915991
FBgn0000715	FMRFa	0.765934	1.86232e-07
FBgn0000719	fog	-0.256319	0.122512
FBgn0000721	for	-0.999242	1.62928e-08
FBgn0000723	FER	-0.503892	2.07197e-08
FBgn0000808	gd	0.471441	0.691327
FBgn0000810	fs(1)K10	0.0898833	0.486102
FBgn0000826	png	0.833206	0.0277271
FBgn0000927	fs(1)Ya	0.284143	0.509712
FBgn0000928	fs(1)Yb	0.653347	0.0518122
FBgn0000964	tj	-0.522405	3.20941e-05
FBgn0000996	dup	-0.215757	0.379862
FBgn0001075	ft	-0.375301	0.329276
FBgn0001077	ftz	0.551161	0.389906
FBgn0001078	ftz-f1	0.18866	0.153515
FBgn0001079	fu	-0.0201107	0.890838
FBgn0267100	lncRNA:CR45540	2.33524	0.00347962	Group Up
FBgn0001084	fy	0.174897	0.174891
FBgn0001085	fz	0.302874	0.00518401
FBgn0001086	fzy	0.235258	0.734978
FBgn0001087	g	0.391859	0.00117966
FBgn0001089	Gal	-0.184138	0.373471
FBgn0001090	bnb	0.0492738	0.80744
FBgn0001091	Gapdh1	-0.888597	1.14372e-11
FBgn0001092	Gapdh2	-0.437218	2.8659e-05
FBgn0001098	Gdh	-0.809421	2.25039e-13
FBgn0001099	gdl	-0.274062	0.846933
FBgn0001104	Galphai	-0.486893	1.68984e-07
FBgn0001105	Gbeta13F	0.375049	0.0242217
FBgn0001108	DCTN1-p150	0.094409	0.270955
FBgn0001112	Gld	-0.629834	0.0592403
FBgn0031622	CG3251	2.27796	0.0164824	Group Up
FBgn0001120	gnu	-1.6403	0.189069
FBgn0001122	Galphao	0.327145	0.0696881
FBgn0001123	Galphas	0.242695	0.00192389
FBgn0001124	Got1	-0.85807	5.14944e-09
FBgn0266616	lncRNA:CR45123	2.27321	1.06163e-05	Group Up
FBgn0001128	Gpdh1	-0.830157	9.20889e-12
FBgn0001133	grau	0.241119	0.00772043
FBgn0001134	Grd	-0.200631	0.436237
FBgn0001137	grk	-0.309885	0.113908
FBgn0001138	grn	0.295911	0.0129864
FBgn0001139	gro	0.435072	3.98843e-05
FBgn0001142	Gs1	-0.280854	0.008169
FBgn0001145	Gs2	-0.964564	1.78029e-10
FBgn0001147	gsb-n	-0.720087	0.340287
FBgn0001148	gsb	-1.79452	0.106845
FBgn0001149	GstD1	-0.648716	0.00780707
FBgn0001150	gt	0.455315	0.0492553
FBgn0001168	h	-0.666547	0.00103042
FBgn0001169	H	0.00173862	0.991652
FBgn0001170	H2.0	-0.114296	0.782993
FBgn0001174	halo	0.284573	0.768631
FBgn0001179	hay	0.333865	6.13119e-06
FBgn0001180	hb	0.0578773	0.688907
FBgn0001185	her	0.111683	0.214819
FBgn0001186	Hex-A	0.0907896	0.601396
FBgn0040801	CG13053	2.26733	0.00718439	Group Up
FBgn0001189	hfw	-0.412165	0.0509879
FBgn0001197	His2Av	0.285717	0.0171376
FBgn0001202	hook	0.158213	0.0536212
FBgn0001206	Hmr	0.518575	2.60473e-08
FBgn0266114	asRNA:CR44840	2.26224	0.00209144	Group Up
FBgn0001215	Hrb98DE	0.236711	0.0105857
FBgn0001216	Hsc70-1	-0.398971	9.39406e-05
FBgn0001217	Hsc70-2	0.346204	0.555649
FBgn0001218	Hsc70-3	-0.427389	0.00838492
FBgn0001220	Hsc70-5	-0.351483	0.00439924
FBgn0001222	Hsf	0.132594	0.0480402
FBgn0001224	Hsp23	-0.862724	0.0380092
FBgn0038507	CG5863	2.2526	0.0108131	Group Up
FBgn0287620	lncRNA:CR46489	2.24399	5.79976e-05	Group Up
FBgn0001227	Hsp67Ba	0.108684	0.522661
FBgn0001229	Hsp67Bc	-0.305734	0.0334007
FBgn0001230	Hsp68	-0.837138	0.0277737
FBgn0001233	Hsp83	-0.197385	0.116992
FBgn0001234	lncRNA:Hsromega	-0.118241	0.428962
FBgn0001235	hth	0.291438	0.103673
FBgn0001247	Ide	0.183374	0.00100578
FBgn0267078	lncRNA:CR45522	2.22771	0.0460324	Group Up
FBgn0001250	if	-0.564709	3.57201e-06
FBgn0001253	ImpE1	0.157696	0.710138
FBgn0001254	ImpE2	-1.12286	0.178559
FBgn0001255	ImpE3	-0.342768	0.547145
FBgn0001256	ImpL1	-1.44724	0.0537548
FBgn0001257	ImpL2	-0.797086	0.00216328
FBgn0001258	Ldh	-0.169156	0.863539
FBgn0001259	in	-0.849634	0.147154
FBgn0001263	inaD	-0.623144	0.000136015
FBgn0001269	inv	0.0364349	0.854754
FBgn0001276	ix	0.208933	0.178559
FBgn0001280	janA	0.0808669	0.821109
FBgn0001285	Jon44E	0.244309	0.744167
FBgn0001291	Jra	0.0653378	0.596623
FBgn0001296	kar	-0.546315	0.00156242
FBgn0001297	kay	-0.384583	1.63512e-05
FBgn0001301	kel	-0.138839	0.342158
FBgn0001308	Khc	0.0148503	0.870266
FBgn0001311	kkv	-0.281929	0.788176
FBgn0001316	klar	0.0112551	0.952286
FBgn0001319	kn	0.328359	0.000116167
FBgn0001320	kni	0.0754192	0.783753
FBgn0001321	knk	-0.390714	0.222961
FBgn0001323	knrl	0.178454	0.433623
FBgn0001324	kto	0.266099	0.0178228
FBgn0001325	Kr	0.448162	0.0022715
FBgn0001330	kz	0.317286	0.000347264
FBgn0001341	Mybbp1A	0.367659	0.00170592
FBgn0001404	egh	0.173143	0.146908
FBgn0001491	l(1)10Bb	-0.0968821	0.637118
FBgn0001565	Hlc	-0.514269	8.60381e-07
FBgn0001612	Grip91	0.0492039	0.707063
FBgn0001624	dlg1	0.168198	0.288968
FBgn0001941	ifc	-0.239433	6.74194e-05
FBgn0001942	eIF4A	-0.429549	3.96478e-06
FBgn0001961	Arpc1	-0.0549546	0.562895
FBgn0001965	Sos	0.256326	0.00667102
FBgn0038492	Mur89F	2.22577	0.000898355	Group Up
FBgn0001970	Pgant35A	0.17594	0.169895
FBgn0001977	CIAPIN1	0.107996	0.170083
FBgn0001978	stc	0.278814	0.00250608
FBgn0001986	Mtr4	0.106516	0.494651
FBgn0001987	Gli	-0.756227	0.000919761
FBgn0001989	ND-B17	-0.347806	0.0288795
FBgn0001990	wek	-0.096919	0.410999
FBgn0001991	Ca-alpha1D	0.413542	0.0270808
FBgn0001992	Cyp303a1	-0.336813	0.815921
FBgn0001994	crp	0.396837	0.000645459
FBgn0001995	mRpL4	0.0879583	0.576799
FBgn0002021	l(2)37Bb	-0.0632505	0.701685
FBgn0002022	Catsup	-0.699204	0.000137931
FBgn0002023	Lim3	0.350784	0.00133571
FBgn0002031	Phb1	-0.246247	0.0915108
FBgn0002036	CG10561	-0.200385	0.0996371
FBgn0002044	swm	0.130355	0.022137
FBgn0002069	AspRS	-0.320907	0.0379952
FBgn0002121	l(2)gl	-0.507273	0.00399115
FBgn0002174	CG5504	-0.000542642	0.999022
FBgn0002183	dre4	0.383755	6.09926e-08
FBgn0002283	l(3)73Ah	0.396775	0.000328357
FBgn0002284	Prosbeta6	0.0606397	0.804708
FBgn0002306	sas	-0.699813	0.00412389
FBgn0002354	l(3)87Df	-0.0354378	0.743781
FBgn0002413	dco	0.0646556	0.593079
FBgn0002431	hyd	0.00314446	0.987189
FBgn0002440	l(3)mbn	1.4158	0.347143
FBgn0002441	l(3)mbt	0.236687	0.00196713
FBgn0002466	sti	0.0988807	0.802914
FBgn0002521	pho	-0.0315992	0.854754
FBgn0002522	lab	-0.170581	0.487686
FBgn0002524	lace	0.0356978	0.821109
FBgn0002525	Lam	0.380026	1.075e-06
FBgn0002526	LanA	-0.517994	0.208577
FBgn0002531	Lcp1	-2.06817	0.0602982
FBgn0002534	Lcp3	0.420344	0.556985
FBgn0002535	Lcp4	0.494441	0.734255
FBgn0002542	lds	0.046832	0.917454
FBgn0002543	robo2	0.221736	0.194878
FBgn0002552	lin	0.171001	0.199489
FBgn0266691	lncRNA:CR45181	2.21247	7.10306e-06	Group Up
FBgn0267099	lncRNA:CR45539	2.20298	0.00874136	Group Up
FBgn0002564	Lsp1gamma	0.12014	0.907485
FBgn0052580	Muc14A	2.13479	2.62301e-06	Group Up
FBgn0002566	lt	0.134022	0.233043
FBgn0002567	Rab32	-0.99035	4.01073e-06
FBgn0002569	Mal-A2	0.797327	0.269453
FBgn0002570	Mal-A1	-0.332656	0.427318
FBgn0002571	Mal-A3	0.0251189	0.986078
FBgn0261429	lncRNA:CR42646	2.12922	0.00167601	Group Up
FBgn0002576	lz	-0.421141	0.0394142
FBgn0002577	m	-0.734013	0.251409
FBgn0002578	Kaz-m1	-0.398565	0.64872
FBgn0002579	RpL36	-0.576874	0.0165261
FBgn0002590	RpS5a	-0.763273	1.5209e-06
FBgn0002592	E(spl)m2-BFM	-0.554317	0.185145
FBgn0002593	RpLP1	-0.608551	0.00487573
FBgn0002609	E(spl)m3-HLH	-0.523794	0.162618
FBgn0002622	RpS3	-0.678702	8.2397e-05
FBgn0002626	RpL32	-0.42982	0.0482057
FBgn0002632	E(spl)m6-BFM	1.13901	0.175066
FBgn0002633	E(spl)m7-HLH	-0.558202	0.516941
FBgn0002638	Rcc1	0.286724	0.000505247
FBgn0002641	mal	0.0469039	0.729602
FBgn0002643	mam	0.172032	0.272348
FBgn0002645	Map205	-0.303206	0.180191
FBgn0002673	twe	0.766412	2.71988e-05
FBgn0002707	mei-9	0.313993	0.118708
FBgn0002709	mei-218	0.991398	0.116662
FBgn0002715	mei-S332	0.654969	1.7663e-05
FBgn0002716	mei-W68	0.411613	0.205475
FBgn0040684	CG12589	2.09797	0.0158374	Group Up
FBgn0002723	Met	0.329105	0.0466236
FBgn0002732	E(spl)malpha-BFM	0.456229	0.472523
FBgn0002733	E(spl)mbeta-HLH	-0.204029	0.623876
FBgn0002734	E(spl)mdelta-HLH	-0.979416	NA
FBgn0002736	mago	0.0779057	0.703666
FBgn0002772	Mlc1	-0.778505	0.0108828
FBgn0002773	Mlc2	-0.949066	0.000600703
FBgn0002774	mle	0.22859	0.00856354
FBgn0002775	msl-3	0.27283	0.00401783
FBgn0002778	mnd	-0.210032	0.257302
FBgn0002780	mod	-0.215514	0.0403192
FBgn0002781	mod(mdg4)	0.321705	3.55079e-06
FBgn0002783	mor	0.358242	3.74468e-09
FBgn0002787	Rpn8	0.277978	0.0422433
FBgn0002789	Mp20	-0.16417	0.417845
FBgn0002791	mr	0.382695	0.00138547
FBgn0002862	Mst87F	0.594397	0.532
FBgn0002863	Acp95EF	1.5792	NA
FBgn0002868	MtnA	-0.309424	0.644497
FBgn0002869	MtnB	-0.0727952	0.948558
FBgn0002872	mu2	0.599468	6.5296e-08
FBgn0002873	mud	0.0217588	0.965581
FBgn0002878	mus101	0.609656	0.000520372
FBgn0002887	mus201	0.651886	2.63243e-08
FBgn0002891	PolZ1	0.694974	2.21708e-06
FBgn0002899	mus301	0.234153	0.352677
FBgn0002901	mus304	0.317222	0.0142143
FBgn0002905	PolQ	0.494476	0.00435921
FBgn0002906	Blm	0.394944	0.0647489
FBgn0002917	na	0.322176	0.0711573
FBgn0002921	Atpalpha	-0.174345	0.179552
FBgn0002922	nau	-0.528964	0.154743
FBgn0002924	ncd	0.277248	0.297296
FBgn0002930	nec	-0.785651	0.0167424
FBgn0002931	net	0.0334605	0.923997
FBgn0002932	neur	-0.127686	0.329942
FBgn0002936	ninaA	-0.967164	2.28622e-06
FBgn0038530	AttD	2.09767	0.00331756	Group Up
FBgn0002938	ninaC	-0.915707	4.35899e-08
FBgn0262825	lncRNA:CR43196	2.09351	0.000563112	Group Up
FBgn0002940	ninaE	-0.380279	0.0695295
FBgn0002941	slou	0.741677	1.89227e-05
FBgn0002945	nkd	-0.0430992	0.82922
FBgn0002948	nod	0.686291	4.89954e-08
FBgn0002973	numb	-0.424356	0.000136846
FBgn0002985	odd	0.0724299	0.727674
FBgn0002989	okr	0.176628	0.233387
FBgn0003002	opa	0.131536	0.304592
FBgn0003008	or	-0.109465	0.493971
FBgn0003011	ort	0.0799679	0.713982
FBgn0003016	osp	-0.221216	0.128493
FBgn0003023	otu	-0.422295	0.433623
FBgn0003028	ovo	-0.667641	0.000115019
FBgn0003041	pbl	-0.165244	0.0910093
FBgn0003042	Pc	0.199636	0.0331378
FBgn0003044	Pcl	0.338448	0.00293152
FBgn0003046	Pcp	-0.00576426	0.991682
FBgn0003048	pcx	0.0896253	0.620977
FBgn0003053	peb	-0.310303	0.0347116
FBgn0000500	Dsk	2.00091	2.27677e-21	Group Up
FBgn0003062	Fib	-0.0358615	0.89318
FBgn0003065	CG2150	0.208273	0.827816
FBgn0003068	per	0.0655289	0.847454
FBgn0003071	Pfk	-0.433909	1.50725e-05
FBgn0003074	Pgi	-0.699854	1.67567e-06
FBgn0003076	Pgm1	-0.959172	4.87062e-06
FBgn0003079	Raf	0.240954	0.00298362
FBgn0003082	phr	0.39435	0.128735
FBgn0003087	pim	0.217485	0.787931
FBgn0003089	pip	-0.528862	0.236983
FBgn0003090	pk	-0.131872	0.348485
FBgn0003091	Pkc53E	0.0476834	0.869459
FBgn0003093	Pkc98E	0.427446	0.000239641
FBgn0003114	plu	-0.205826	0.912084
FBgn0003116	pn	-0.444396	4.29466e-06
FBgn0003117	pnr	-0.62661	0.145018
FBgn0003118	pnt	-0.292487	0.141766
FBgn0003124	polo	0.107012	0.891439
FBgn0003129	Poxm	-0.493704	0.322994
FBgn0003130	Poxn	0.839338	8.93318e-06
FBgn0003132	Pp1-13C	0.895518	0.101615
FBgn0003134	Pp1alpha-96A	-0.170387	0.237643
FBgn0003137	Ppn	-0.202419	0.752956
FBgn0003139	PpV	-0.120805	0.109338
FBgn0003141	pr	-0.683733	0.00223357
FBgn0003145	prd	-0.86954	0.301183
FBgn0030721	CG12698	1.99717	1.17086e-06	Group Up
FBgn0003159	CG2841	-0.50608	0.00154644
FBgn0003162	Pu	-0.907924	0.00018922
FBgn0003165	pum	0.514586	0.00206337
FBgn0003169	put	-0.243262	0.0990224
FBgn0003174	pwn	-0.80466	0.00168606
FBgn0003175	px	0.211188	0.00544764
FBgn0003187	qua	0.438609	0.120452
FBgn0003189	r	0.299882	0.19595
FBgn0003204	ras	-0.324448	0.000806615
FBgn0003205	Ras85D	0.161374	0.020791
FBgn0003206	Ras64B	-0.0231241	0.800723
FBgn0003209	raw	0.215799	0.0234176
FBgn0003210	rb	0.175019	0.2355
FBgn0003218	rdgB	-0.263429	0.0249153
FBgn0003227	rec	0.094216	0.782821
FBgn0003231	ref(2)P	-0.0603124	0.685122
FBgn0051386	lncRNA:CR31386	1.96575	0.00484694	Group Up
FBgn0003249	Rh3	-0.344509	0.137261
FBgn0003250	Rh4	-0.33711	0.141859
FBgn0003254	rib	-0.666088	0.0530811
FBgn0003255	rk	0.358635	0.00232599
FBgn0003256	rl	-0.0265067	0.924162
FBgn0003257	r-l	0.153427	0.414425
FBgn0003261	Rm62	0.0941291	0.098607
FBgn0003267	ro	0.732751	0.196365
FBgn0003268	rod	0.553794	0.00179
FBgn0003274	RpLP2	-0.747553	0.0109197
FBgn0003275	Polr2F	0.223831	0.258097
FBgn0003277	Polr2A	-0.0994334	0.510732
FBgn0003278	Polr1B	0.185685	0.26136
FBgn0003279	RpL4	-0.438365	0.0109086
FBgn0003285	rst	0.309595	0.0472397
FBgn0003292	rt	0.343222	0.00669823
FBgn0003295	ru	0.0267504	0.882318
FBgn0003300	run	0.448553	0.027554
FBgn0003301	rut	0.320132	0.170651
FBgn0003302	rux	0.496619	1.45966e-06
FBgn0003308	ry	-0.887353	4.67849e-07
FBgn0003310	S	-0.206767	0.0681819
FBgn0003312	sad	-0.0952607	0.865629
FBgn0003317	sax	-0.0180111	0.877512
FBgn0003319	Sb	-0.718882	0.0273678
FBgn0003321	sbr	0.49805	8.94689e-05
FBgn0003326	sca	0.413535	0.000271672
FBgn0003330	Sce	0.405312	4.28199e-05
FBgn0003334	Scm	0.0702539	0.667811
FBgn0003339	Scr	-0.0705647	0.666967
FBgn0003345	sd	0.34	0.0140791
FBgn0003346	RanGAP	0.244217	0.0990224
FBgn0003353	sei	0.324563	8.14405e-05
FBgn0003356	Jon99Cii	-0.831215	0.492663
FBgn0003357	Jon99Ciii	-0.337769	0.728535
FBgn0003358	Jon99Ci	-0.9227	0.357319
FBgn0003360	sesB	-0.814152	1.54284e-11
FBgn0003366	sev	-0.0145735	0.954046
FBgn0003371	sgg	0.0305368	0.88663
FBgn0003372	Sgs1	0.120102	0.836587
FBgn0003374	Sgs4	0.277627	0.803957
FBgn0003380	Sh	0.527866	0.0341091
FBgn0003382	sha	-0.452508	0.731613
FBgn0003386	Shaw	0.423331	0.0209055
FBgn0031580	CG15423	1.94746	0.0182823	Group Up
FBgn0003390	shf	-0.653633	0.0475956
FBgn0003391	shg	-0.339025	0.048977
FBgn0003392	shi	0.022717	0.877464
FBgn0003396	shn	-0.242054	0.121254
FBgn0003401	shu	0.0438794	0.956231
FBgn0003410	sina	0.289764	0.00221972
FBgn0003415	skd	0.243052	0.246808
FBgn0003416	sl	-0.209714	0.35983
FBgn0003423	slgA	-0.100024	0.436746
FBgn0003429	slo	0.561687	0.000915357
FBgn0003430	slp1	0.408801	0.000603796
FBgn0003435	sm	0.259866	0.12747
FBgn0003444	smo	-0.0224676	0.894475
FBgn0003447	sn	-0.706065	3.8283e-06
FBgn0003448	sna	0.410122	0.71887
FBgn0003449	snf	0.128468	0.369462
FBgn0003459	stwl	0.153184	0.430825
FBgn0003460	so	-0.449016	1.28593e-05
FBgn0003462	Sod1	-0.416785	0.00949814
FBgn0003463	sog	-0.432424	3.08746e-07
FBgn0003464	sol	0.374084	1.29407e-05
FBgn0003475	spir	-0.0555282	0.63105
FBgn0003479	spn-A	-0.095523	0.819592
FBgn0003480	spn-B	0.0612681	0.782941
FBgn0003482	spn-D	0.0320297	0.979695
FBgn0003483	spn-E	-0.117778	0.616018
FBgn0003495	spz	-0.384653	3.85665e-05
FBgn0003499	sr	-0.275411	0.0422625
FBgn0003502	Btk	-0.181149	0.248931
FBgn0264569	lncRNA:CR43941	1.92934	0.027561	Group Up
FBgn0003512	Sry-delta	0.339553	0.0104109
FBgn0003513	ss	0.484588	0.0188105
FBgn0003514	sqh	-0.354396	6.89478e-07
FBgn0003515	st	-0.889733	0.0013346
FBgn0003517	sta	-0.274749	0.179136
FBgn0003520	stau	0.00657714	0.965136
FBgn0003525	stg	-0.319316	0.369462
FBgn0003545	sub	-0.156844	NA
FBgn0003557	Su(dx)	-0.0838345	0.501449
FBgn0003559	su(f)	0.293178	1.20231e-06
FBgn0003567	su(Hw)	0.113442	0.148023
FBgn0003575	su(sable)	0.0503508	0.64872
FBgn0003598	Su(var)3-7	0.297502	0.0105425
FBgn0003607	Su(var)205	0.357291	0.0011545
FBgn0003612	Su(var)2-10	0.337686	6.53821e-07
FBgn0003638	su(w[a])	0.705705	5.34065e-08
FBgn0003651	svp	-0.493757	0.00151268
FBgn0003654	sw	0.155489	0.10008
FBgn0003655	swa	0.0264923	0.979695
FBgn0003656	sws	0.0328199	0.783753
FBgn0003660	Syb	-0.552891	8.23516e-06
FBgn0003676	CCT1	0.244854	0.0600006
FBgn0003683	term	0.870486	0.515868
FBgn0003687	Tbp	0.34488	0.00166122
FBgn0003701	thr	0.525419	0.294848
FBgn0003710	tipE	0.168072	0.163488
FBgn0003714	tko	-0.0467897	0.874413
FBgn0003716	tkv	-0.196959	0.0730703
FBgn0003719	tld	-0.336739	0.244876
FBgn0003721	Tm1	-0.407805	0.0198812
FBgn0034730	ppk12	1.90134	0.0299709	Group Up
FBgn0003733	tor	-0.483439	0.710848
FBgn0003741	tra	0.602285	9.99503e-06
FBgn0003742	tra2	0.26666	0.00103493
FBgn0003744	trc	0.0147219	0.912526
FBgn0003747	Gr5a	0.403065	0.520189
FBgn0003748	Treh	-0.270461	0.0502818
FBgn0003751	trk	0.017942	0.978679
FBgn0003861	trp	-0.638969	2.54266e-05
FBgn0003862	trx	0.0596398	0.774807
FBgn0003863	alphaTry	2.157	0.126407
FBgn0003866	tsh	0.199623	0.19079
FBgn0010019	Cyp4g1	1.8778	0.0229063	Group Up
FBgn0003870	ttk	-0.517304	0.000253349
FBgn0003882	tub	-0.228647	0.01125
FBgn0003884	alphaTub84B	-0.171731	0.12177
FBgn0003885	alphaTub84D	-0.153323	0.321338
FBgn0267087	lncRNA:CR45531	1.82315	0.00157197	Group Up
FBgn0003889	betaTub85D	0.244483	0.570227
FBgn0003890	betaTub97EF	-0.874092	4.35488e-15
FBgn0003891	tud	-0.050454	0.72881
FBgn0003892	ptc	-0.392996	0.100095
FBgn0003896	tup	0.234163	0.00433382
FBgn0003900	twi	0.448379	0.2942
FBgn0003930	snRNA:U4:39B	-0.185159	0.769295
FBgn0003941	RpL40	-0.564517	4.92911e-05
FBgn0003942	RpS27A	-0.604828	0.000505326
FBgn0003943	Ubi-p63E	0.00694936	0.98633
FBgn0003944	Ubx	0.42785	0.448577
FBgn0003950	unc	0.742221	0.291207
FBgn0003963	ush	0.228681	0.0708406
FBgn0003964	usp	0.134181	0.0331139
FBgn0259195	CG42299	1.81583	0.00564908	Group Up
FBgn0003969	vap	0.312468	2.76499e-05
FBgn0003975	vg	0.740093	8.60381e-07
FBgn0003977	vir	0.206184	0.0117942
FBgn0003978	vls	0.201478	0.201041
FBgn0003980	Vm26Ab	0.909556	0.339943
FBgn0003984	vn	-0.583906	2.20897e-05
FBgn0003996	w	-0.983298	0.00195655
FBgn0003997	hid	0.0349694	0.883289
FBgn0004003	wbl	-0.49478	0.160071
FBgn0004034	y	-0.200675	0.811173
FBgn0004379	Klp67A	1.81404	1.94747e-11	Group Up
FBgn0267800	lncRNA:CR46125	1.80852	0.00927827	Group Up
FBgn0004049	yrt	-0.0262506	0.807663
FBgn0004050	z	0.384291	1.67605e-08
FBgn0004055	uzip	-0.104663	0.406752
FBgn0051371	CG31371	1.78516	0.00847156	Group Up
FBgn0004066	Prosalpha4	-0.0490698	0.805696
FBgn0004087	Dhfr	-0.337943	0.209032
FBgn0004101	bs	0.125312	0.12118
FBgn0004102	oc	0.0844324	0.681058
FBgn0004103	Pp1-87B	-0.21611	0.00647373
FBgn0004106	Cdk1	-0.260304	0.701827
FBgn0004107	Cdk2	0.623113	6.33343e-09
FBgn0004108	Nrt	-0.140726	0.336098
FBgn0004110	tin	0.835016	0.0894326
FBgn0004117	Tm2	-0.53541	0.013311
FBgn0004118	nAChRbeta2	0.254457	0.0689684
FBgn0004132	boca	0.105231	0.620583
FBgn0004133	blow	-0.175936	0.136135
FBgn0004167	kst	-0.355623	0.00223385
FBgn0004168	5-HT1A	0.499398	1.74428e-05
FBgn0004169	up	-0.744855	0.000710327
FBgn0004177	mts	0.218226	0.0555532
FBgn0004179	Csp	-0.197269	0.177226
FBgn0004187	snRNA:U1:95Cc	-1.00549	0.439755
FBgn0004192	snRNA:U2:34ABb	-1.38783	0.208442
FBgn0004197	Ser	-0.427979	0.261212
FBgn0004198	ct	0.161284	0.390959
FBgn0004227	nonA	0.143641	0.0251839
FBgn0004228	mex1	0.321048	0.747894
FBgn0004237	Hrb87F	0.369636	9.48618e-06
FBgn0004240	DptA	-0.624653	0.478544
FBgn0004242	Syt1	0.00998674	0.965618
FBgn0004244	Rdl	0.671975	0.00905756
FBgn0004359	T48	-0.428298	2.54474e-07
FBgn0032503	CG16825	1.76178	0.0242559	Group Up
FBgn0004362	HmgD	0.628091	0.000484412
FBgn0004363	porin	-0.371743	0.00258104
FBgn0004367	mei-41	0.304412	0.0456965
FBgn0004368	Ptp4E	0.175554	0.131306
FBgn0004369	Ptp99A	0.430701	0.000117304
FBgn0004370	Ptp10D	-0.143882	0.349496
FBgn0004373	fwd	-0.167866	0.270943
FBgn0004374	neb	0.526804	0.316106
FBgn0004378	Klp61F	-0.250169	0.836484
FBgn0051148	Gba1a	1.75157	0.00377925	Group Up
FBgn0004380	Klp64D	0.141766	0.128194
FBgn0004381	Klp68D	0.115756	0.266161
FBgn0004387	Klp98A	-0.114768	0.358231
FBgn0004390	RasGAP1	0.279193	0.0141179
FBgn0004391	shtd	0.121326	0.329868
FBgn0004394	pdm2	0.677643	0.000268031
FBgn0004395	unk	0.401356	0.00434258
FBgn0004396	CrebA	-0.100847	0.599129
FBgn0004397	Vinc	-0.210002	0.128782
FBgn0004400	rhi	0.25015	0.811128
FBgn0004401	Pep	0.528119	1.35623e-09
FBgn0004403	RpS14a	-0.369242	0.0240435
FBgn0004404	RpS14b	-0.229857	0.314657
FBgn0004406	PolG1	0.395085	0.10348
FBgn0004419	me31B	0.0159259	0.89511
FBgn0004427	LysD	0.188169	0.90322
FBgn0004430	LysS	-0.899108	0.34132
FBgn0004432	Cyp1	-0.515428	4.79601e-10
FBgn0004435	Galphaq	0.329568	0.00961104
FBgn0004436	Ubc6	-0.354457	1.30043e-05
FBgn0004449	Ten-m	0.0793881	0.579468
FBgn0004456	mew	-0.277151	0.00563219
FBgn0004463	Polr3B	0.281101	0.00333255
FBgn0004465	Su(P)	-0.0322933	0.890838
FBgn0004507	GlyP	-0.947728	1.39183e-09
FBgn0004509	Fur1	0.0770015	0.545951
FBgn0004510	Ets97D	0.340759	2.42306e-05
FBgn0004511	dy	0.346095	0.579468
FBgn0004512	Mdr49	-0.120313	0.713391
FBgn0004513	Mdr65	-0.694471	5.24101e-05
FBgn0004514	Oct-TyrR	0.123573	0.326369
FBgn0004516	Gad1	0.000165895	0.999517
FBgn0004552	Akh	-0.137016	0.84146
FBgn0004554	Edg91	-0.403354	0.6422
FBgn0004556	Dbp73D	0.0447054	0.819394
FBgn0004567	slp2	0.0147268	0.953934
FBgn0004569	aos	-0.723254	5.01684e-05
FBgn0004573	5-HT7	0.334876	0.00677132
FBgn0004574	Rop	-0.0504115	0.70227
FBgn0004575	Syn	0.203587	0.176582
FBgn0004577	Pxd	1.82694	0.0904921
FBgn0004580	Cbp53E	0.0954975	0.576184
FBgn0004581	bgcn	0.190978	0.825161
FBgn0004583	ex	-0.861726	0.000405174
FBgn0004584	Rrp1	0.573359	2.77886e-08
FBgn0004587	B52	0.493125	1.87782e-10
FBgn0004595	pros	0.796591	0.000453757
FBgn0004597	CycC	0.017828	0.900562
FBgn0004598	Fur2	0.13341	0.0232421
FBgn0004606	zfh1	0.0569267	0.741214
FBgn0004607	zfh2	0.0608928	0.80102
FBgn0004611	Plc21C	0.262951	0.0238
FBgn0004618	gl	-0.252244	0.0704344
FBgn0004619	GluRIA	0.404145	2.28622e-06
FBgn0004620	GluRIIA	-0.0705836	0.775172
FBgn0004622	TkR99D	0.415868	0.00068398
FBgn0004623	Gbeta76C	-0.951407	8.71472e-08
FBgn0266984	lncRNA:CR45435	1.68919	0.0138808	Group Up
FBgn0004635	rho	0.0367103	0.862824
FBgn0004636	Rap1	0.142998	0.186854
FBgn0004638	drk	-0.104277	0.567896
FBgn0004643	Zw10	0.202028	0.0410088
FBgn0004644	hh	0.531142	0.230374
FBgn0267987	lncRNA:CR46254	1.68464	0.0147292	Group Up
FBgn0004647	N	-0.472412	0.000419944
FBgn0004648	svr	0.01453	0.90761
FBgn0004650	fs(1)N	-0.962666	0.214031
FBgn0004652	fru	-0.167057	0.0893385
FBgn0030222	CG9806	1.68138	0.0361856	Group Up
FBgn0004655	wapl	0.260459	0.021442
FBgn0004656	fs(1)h	0.599315	2.39755e-05
FBgn0004657	mys	-0.153456	0.378432
FBgn0004666	sim	0.500435	0.00343667
FBgn0004687	Mlc-c	-0.512027	4.19028e-09
FBgn0004698	Xpc	0.139915	0.147701
FBgn0004777	Ccp84Ag	-0.433441	0.653987
FBgn0004779	Ccp84Ae	0.406902	0.787848
FBgn0004780	Ccp84Ad	-0.403482	0.760542
FBgn0004781	Ccp84Ac	-1.55736	0.275743
FBgn0004782	Ccp84Ab	-0.297296	0.835036
FBgn0004783	Ccp84Aa	-0.868292	0.538196
FBgn0004784	inaC	-0.839819	1.10763e-06
FBgn0004795	retn	-0.398092	0.0199596
FBgn0051797	CG31797	1.66955	0.0317167	Group Up
FBgn0004811	fs(2)ltoPP43	0.117833	0.146244
FBgn0004828	His3.3B	0.0201799	0.861498
FBgn0004832	Xpac	0.649391	2.15143e-08
FBgn0004837	Su(H)	-0.149557	0.200137
FBgn0004838	Hrb27C	0.315668	0.0628116
FBgn0004839	otk	0.434661	0.00134043
FBgn0004841	TkR86C	0.382818	0.000214991
FBgn0004842	RYa-R	0.803272	6.01866e-05
FBgn0004852	Ac76E	-0.151178	0.203776
FBgn0004854	B-H2	-0.314501	0.195969
FBgn0004855	Polr2I	0.0155217	0.912395
FBgn0004856	Bx42	0.00849806	0.921968
FBgn0004858	elB	0.234717	0.040134
FBgn0004859	ci	-0.516507	0.0122518
FBgn0004860	ph-d	0.417071	4.87046e-07
FBgn0004861	ph-p	0.356003	1.72574e-06
FBgn0004862	bap	0.0641656	0.866406
FBgn0004863	C15	0.769168	3.52271e-05
FBgn0004864	hop	0.0537124	0.789122
FBgn0004865	Eip78C	0.241176	0.0695958
FBgn0004867	RpS2	-0.306215	0.0613436
FBgn0004868	Gdi	-0.168942	0.0158374
FBgn0004870	bab1	0.633338	0.000788688
FBgn0004872	piwi	-0.164265	0.794289
FBgn0004875	enc	0.262664	0.0397612
FBgn0004876	cdi	-0.0917745	0.640251
FBgn0004878	cas	-1.69972	NA
FBgn0004880	scrt	0.594759	0.0011436
FBgn0004882	orb	0.243619	0.178722
FBgn0004885	tok	-0.0488144	0.783121
FBgn0004888	Scsalpha1	-0.700024	1.32937e-11
FBgn0004889	tws	-0.176636	0.19343
FBgn0004892	sob	0.136696	0.559522
FBgn0004893	bowl	-0.500173	0.00542014
FBgn0004896	fd59A	0.348201	0.0131946
FBgn0004897	fd96Ca	0.738489	0.119429
FBgn0004898	fd96Cb	-0.323683	0.479606
FBgn0004901	Prat	-0.147946	0.538252
FBgn0004903	Rb97D	0.193838	0.182323
FBgn0004907	14-3-3zeta	-0.0815728	0.506632
FBgn0004908	Arl2	0.051512	0.724211
FBgn0004910	Eip63F-1	-0.220285	0.147978
FBgn0004911	asRNA:Eig63F-2	-0.303857	0.747092
FBgn0004913	Gnf1	0.278442	2.6687e-05
FBgn0004914	Hnf4	-0.82159	0.000207873
FBgn0004915	TfIIB	0.0152097	0.914539
FBgn0004919	gol	0.00425873	0.986549
FBgn0004921	Ggamma1	-8.58101e-05	0.999696
FBgn0004924	Top1	0.205673	0.0785684
FBgn0004926	eIF2beta	0.0251044	0.908329
FBgn0004956	upd1	-0.292395	0.822563
FBgn0004957	por	0.103145	0.340756
FBgn0004959	phm	-0.897073	0.289613
FBgn0005198	gig	0.130168	0.145723
FBgn0005278	Sam-S	-0.656021	1.62928e-08
FBgn0005322	nmd	0.109043	0.305263
FBgn0005355	Su(fu)	0.0197133	0.887487
FBgn0005386	ash1	0.507617	1.90952e-07
FBgn0005390	fs(1)M3	0.770788	0.329438
FBgn0058005	CR40005	1.66715	0.0158671	Group Up
FBgn0005411	U2af50	-0.0564068	0.466542
FBgn0005427	ewg	0.391698	7.30056e-07
FBgn0005533	RpS17	-0.55528	0.000903149
FBgn0005536	Mbs	-0.0346359	0.748582
FBgn0005558	ey	0.504437	9.2374e-12
FBgn0005561	sv	-0.522201	0.0106961
FBgn0005564	Shal	0.176215	0.0842387
FBgn0005585	Calr	0.0340989	0.878413
FBgn0005586	Rab3	0.186682	0.129903
FBgn0005590	scw	-0.480704	0.75056
FBgn0005593	RpL7	-0.477759	0.00200109
FBgn0005596	yem	0.340438	0.000648886
FBgn0005612	Sox14	-0.347889	0.242777
FBgn0005613	Sox15	-0.380612	0.170083
FBgn0005614	trpl	-0.619468	0.0963946
FBgn0005616	msl-2	0.245588	0.0346476
FBgn0005617	msl-1	0.159011	0.310548
FBgn0005619	Hdc	-0.796463	5.30961e-10
FBgn0005624	Psc	0.0286673	0.839291
FBgn0005626	ple	-0.605107	0.00262191
FBgn0005631	robo1	0.20408	0.127863
FBgn0005632	faf	0.0244247	0.853761
FBgn0005633	fln	0.942278	0.0479571
FBgn0005636	nvy	0.382254	4.09204e-05
FBgn0031171	CG1801	1.66358	0.0284735	Group Up
FBgn0005640	Eip63E	0.0654239	0.62766
FBgn0005642	wdn	0.472332	4.6166e-07
FBgn0005648	Pabp2	0.749603	1.03899e-07
FBgn0005649	Rox8	0.189987	0.048675
FBgn0005655	PCNA	-0.721474	0.204343
FBgn0005658	Ets65A	0.263832	0.0252758
FBgn0005659	Ets98B	-0.750795	6.25287e-05
FBgn0005660	Ets21C	0.598349	0.141859
FBgn0005664	Crys	-0.659803	0.429996
FBgn0005666	bt	-0.253263	0.179206
FBgn0005670	Cyp4d1	-1.30204	0.105759
FBgn0005671	Vha55	-0.276771	0.00129278
FBgn0005672	spi	0.475209	6.02842e-14
FBgn0005674	GluProRS	-0.279985	0.0383625
FBgn0005677	dac	0.660116	3.95739e-12
FBgn0005683	pie	0.654504	0.000117154
FBgn0005694	Aef1	0.0230989	0.869459
FBgn0005695	gcl	0.180464	0.0139119
FBgn0005696	PolA2	0.00554527	0.990509
FBgn0005771	noc	-0.0476747	0.742715
FBgn0005775	Con	0.505956	0.000284165
FBgn0005777	PpD3	-0.187248	0.0602975
FBgn0008635	betaCOP	-0.31822	0.00381197
FBgn0008636	hbn	0.357028	0.0070102
FBgn0008646	E5	0.297239	0.10302
FBgn0008651	lbl	0.167274	0.437881
FBgn0010014	CanB	0.0707707	0.504046
FBgn0010015	CanA1	-0.161796	0.333758
FBgn0015550	tap	1.61755	0.00948095	Group Up
FBgn0010038	GstD2	-1.38797	0.0603023
FBgn0010039	GstD3	-0.750404	0.00674066
FBgn0010040	GstD4	-1.15409	0.206768
FBgn0010041	GstD5	-0.189702	0.856306
FBgn0010042	GstD6	-1.10413	0.186328
FBgn0287612	lncRNA:CR46481	1.6063	1.9907e-06	Group Up
FBgn0010044	GstD8	-0.47798	0.127089
FBgn0010051	Itpr	0.056675	0.750528
FBgn0033593	Listericin	1.59707	1.45915e-11	Group Up
FBgn0033926	Arc1	1.5872	9.26274e-07	Group Up
FBgn0010078	RpL23	-0.720864	0.000330296
FBgn0010097	gammaTub37C	0.363161	NA
FBgn0010100	mAcon1	-0.600854	1.70506e-08
FBgn0010105	comm	0.222403	0.00138421
FBgn0010109	dpn	-0.744014	0.18136
FBgn0010113	hdc	0.71226	0.000597891
FBgn0010114	hig	0.389551	3.20941e-05
FBgn0010173	RPA1	0.149241	0.0620985
FBgn0010194	Wnt5	0.186727	0.0929924
FBgn0010197	Gyc32E	0.606416	0.000266746
FBgn0010198	RpS15Aa	-0.722587	1.23465e-05
FBgn0010213	Sod2	-0.285887	0.0960448
FBgn0010215	alpha-Cat	0.138388	0.209729
FBgn0010217	ATPsynbeta	-0.728542	1.31865e-12
FBgn0010220	Dbp45A	0.219991	0.0610778
FBgn0266993	lncRNA:CR45444	1.57993	0.00619114	Group Up
FBgn0010223	Galphaf	0.194449	0.574484
FBgn0033736	CG13154	1.55852	0.0455371	Group Up
FBgn0010226	GstS1	-0.945295	0.000447931
FBgn0010228	HmgZ	0.272818	0.146132
FBgn0010235	Klc	0.189676	0.0137069
FBgn0010238	Lac	-0.389547	0.0200099
FBgn0010240	Lcch3	0.327599	0.000793508
FBgn0264084	lncRNA:CR43753	1.55722	0.0310145	Group Up
FBgn0266317	asRNA:CR44982	1.54899	0.0424324	Group Up
FBgn0010247	Parp	0.0635053	0.755539
FBgn0035737	Cpr65Ec	1.54887	0.00481939	Group Up
FBgn0010263	Rbp9	-0.183261	0.212675
FBgn0010265	RpS13	-0.778505	1.67682e-07
FBgn0010269	Dsor1	0.441077	6.89662e-05
FBgn0010278	Ssrp	0.774273	2.14868e-07
FBgn0010280	Taf4	0.400857	9.73178e-07
FBgn0010282	TfIIFalpha	0.501181	0.000264183
FBgn0010287	Trf	0.192675	0.212321
FBgn0010288	Uch	0.30045	0.175273
FBgn0010292	bys	0.047816	0.714522
FBgn0010294	ng2	-0.00852476	NA
FBgn0010300	brat	0.643328	0.000173836
FBgn0010303	hep	0.264873	0.00990168
FBgn0010309	pigeon	-0.0639051	0.615018
FBgn0010313	corto	-0.0718838	0.643066
FBgn0010314	Cks30A	0.286212	0.628597
FBgn0010315	CycD	-0.516816	0.00413996
FBgn0010316	dap	-0.547125	0.0307267
FBgn0010317	CycJ	0.531379	0.00113224
FBgn0010323	Gsc	0.658264	6.1445e-05
FBgn0010328	woc	0.353348	0.00131926
FBgn0010329	Tbh	0.373642	0.00140851
FBgn0010333	Rac1	-0.0315536	0.807241
FBgn0010339	128up	0.145368	0.22226
FBgn0010340	140up	-0.0969669	0.482272
FBgn0010341	Cdc42	-0.146197	0.138431
FBgn0010342	Map60	0.476371	9.63277e-06
FBgn0010348	Arf1	-0.196398	0.0102438
FBgn0010350	Cds	-0.695778	1.19166e-05
FBgn0010352	Ogdh	-0.499748	1.48465e-08
FBgn0010355	Taf1	0.344783	1.4316e-05
FBgn0010356	Taf5	0.143527	0.132324
FBgn0010379	Akt	-0.123757	0.375022
FBgn0010380	AP-1-2beta	0.0207096	0.8244
FBgn0010382	CycE	-0.417776	0.414625
FBgn0052793	CG32793	1.54709	0.0486228	Group Up
FBgn0010385	Def	0.456341	0.332241
FBgn0035167	Gr61a	1.54681	0.00108821	Group Up
FBgn0010388	Dro	-1.018	0.24011
FBgn0010389	htl	-0.443745	0.00366365
FBgn0010391	SrpRalpha	-0.0824824	0.501449
FBgn0010395	Itgbn	0.170473	0.742214
FBgn0010397	LamC	-0.370277	0.00513655
FBgn0010398	Lrr47	0.191309	0.179913
FBgn0010399	Nmdar1	0.344744	0.0546783
FBgn0010401	Os-C	-1.44974	0.110685
FBgn0010403	Obp83b	-1.08664	0.229862
FBgn0010406	RNaseX25	-0.462371	0.000176987
FBgn0010407	Ror	0.724679	2.94244e-14
FBgn0010408	RpS9	-0.564178	0.00528959
FBgn0010409	RpL18A	-0.55032	0.000457421
FBgn0010411	RpS18	-0.476473	0.0132408
FBgn0010412	RpS19a	-0.624483	0.000103092
FBgn0010414	SerT	0.0702617	0.610506
FBgn0010415	Sdc	0.341354	0.00680173
FBgn0010416	TH1	-0.0859401	0.505331
FBgn0010417	Taf6	0.0808079	0.657255
FBgn0010421	TfIIFbeta	0.0220129	0.832166
FBgn0010422	TfIIS	0.107564	0.23556
FBgn0010423	TpnC47D	0.609734	0.414348
FBgn0010424	TpnC73F	0.281927	0.269746
FBgn0010431	mtrm	-0.657622	0.521076
FBgn0010433	ato	0.39888	0.292815
FBgn0010434	cora	0.132579	0.190571
FBgn0267801	lncRNA:CR46126	1.54098	0.0279712	Group Up
FBgn0010438	mtSSB	0.465353	0.00367517
FBgn0010441	pll	-0.24216	0.0365837
FBgn0010452	trn	0.102969	0.242378
FBgn0010453	Wnt4	0.324078	0.02029
FBgn0010470	Fkbp14	-0.970496	1.8674e-07
FBgn0010473	tutl	0.334111	0.0129366
FBgn0010482	hlk	-0.419497	0.00518402
FBgn0010488	NAT1	-0.144703	0.17694
FBgn0034935	Orcokinin	1.53473	4.36913e-09	Group Up
FBgn0010501	Dcp-1	0.307486	0.0602776
FBgn0010504	kermit	-0.866801	0.0469247
FBgn0010516	wal	-0.841542	1.67631e-08
FBgn0010520	Bka	0.199072	0.114631
FBgn0010531	Ccs	0.0140757	0.924407
FBgn0010548	Aldh-III	-0.51823	0.000821727
FBgn0010549	l(2)03659	0.0961346	0.916157
FBgn0010551	Phb2	-0.0311919	0.781371
FBgn0010583	dock	0.172565	0.0799331
FBgn0010590	Prosbeta1	0.144552	0.473266
FBgn0010591	Sply	-0.267221	0.0524379
FBgn0010602	lwr	0.0287758	0.844732
FBgn0010607	l(2)05714	0.300349	0.00162317
FBgn0010611	Hmgs	-0.566078	1.45174e-09
FBgn0010612	ATPsynG	-0.476174	0.0012303
FBgn0010620	CG10939	-0.469212	0.00759202
FBgn0010621	CCT5	0.0598397	0.735236
FBgn0010622	DCTN3-p24	0.0674316	0.680474
FBgn0010638	Sec61beta	-0.227962	0.0158374
FBgn0010651	MFS14	-0.702038	0.000386362
FBgn0010660	Nup214	0.394405	1.98905e-05
FBgn0010741	Pfdn2	0.141041	0.37279
FBgn0010747	Srp54k	-0.173868	0.0414156
FBgn0010750	atms	0.275336	0.000170008
FBgn0010762	simj	0.456872	0.151026
FBgn0010768	sqz	0.0805841	0.559721
FBgn0010770	ppan	0.330582	0.000332234
FBgn0010772	Xe7	0.687049	1.04352e-09
FBgn0010774	Ref1	0.147346	0.0184315
FBgn0010786	l(3)02640	0.133977	0.196125
FBgn0010803	TrpRS	0.079738	0.396714
FBgn0010808	Chchd3	-0.271229	0.0424324
FBgn0010825	Gug	0.339508	0.0190487
FBgn0010830	l(3)04053	0.279371	0.00809761
FBgn0010877	l(3)05822	0.000533915	0.996887
FBgn0010894	sinu	-0.206941	0.0752693
FBgn0010905	Spn	0.566177	0.00012254
FBgn0010909	msn	0.235425	0.0159895
FBgn0010926	l(3)07882	0.239853	0.0111528
FBgn0011016	SsRbeta	-0.301193	0.00383048
FBgn0011020	Sas-4	0.52198	7.66593e-07
FBgn0011202	dia	-0.136694	0.273808
FBgn0011204	cue	-0.394735	0.0016374
FBgn0011205	fbl	-0.685831	7.07519e-06
FBgn0011206	bol	0.350786	0.0596635
FBgn0011207	pelo	0.088095	0.361848
FBgn0011211	blw	-0.712614	1.16057e-08
FBgn0011217	eff	-0.234195	0.138586
FBgn0011224	heph	0.460927	0.000200114
FBgn0011225	jar	-0.28457	0.000104003
FBgn0011227	ox	-0.413837	0.0102071
FBgn0011230	poe	-0.0710044	0.549986
FBgn0011232	scat	0.139383	0.093685
FBgn0011236	ken	-0.707369	0.00160248
FBgn0011259	Sema1a	0.429522	0.0124324
FBgn0011260	Sema2a	0.0433724	0.742713
FBgn0011270	Pglym87	-0.453817	0.775039
FBgn0011272	RpL13	-0.305952	0.041616
FBgn0011274	Dif	-0.386361	0.0112856
FBgn0011276	HLH3B	0.290032	0.142286
FBgn0011277	HLH4C	0.344662	0.264404
FBgn0011278	lbe	-0.614592	0.617059
FBgn0011279	Obp69a	0.286918	0.444331
FBgn0011280	Obp19d	-0.282284	0.269746
FBgn0011281	Obp83a	-1.00437	0.206372
FBgn0011282	Obp84a	-1.21671	0.212579
FBgn0267304	lncRNA:CR45740	1.51843	0.0130456	Group Up
FBgn0011284	RpS4	-0.623887	2.02252e-05
FBgn0011286	RyR	0.0610929	0.754778
FBgn0011288	Snap25	0.138649	0.493111
FBgn0011289	TfIIA-L	0.0619236	0.501449
FBgn0011290	Taf12	0.323402	0.0031063
FBgn0011291	Taf11	0.350032	0.0343035
FBgn0011293	a10	-1.04604	0.376991
FBgn0011294	a5	-1.17853	0.388405
FBgn0011296	l(2)efl	-0.368089	0.102758
FBgn0011297	Alg3	-0.162525	0.346075
FBgn0011300	babo	0.0234025	0.854754
FBgn0011305	Rsf1	0.0276049	0.818634
FBgn0011327	Uch-L5	0.474635	0.0516408
FBgn0011335	vers	0.340292	0.0131705
FBgn0011336	Stt3B	-0.678208	8.03537e-07
FBgn0011361	ND-ACP	-0.454145	0.0115555
FBgn0011455	ND-SGDH	-0.50017	5.87007e-07
FBgn0011474	PR-Set7	0.0993567	0.644823
FBgn0011476	l(3)neo43	0.0989175	0.713982
FBgn0011481	Ssdp	0.318208	0.0142268
FBgn0011509	SrpRbeta	0.10581	0.387932
FBgn0011559	Acp36DE	-0.266101	0.790997
FBgn0011566	Smyd3	0.0595103	0.718409
FBgn0011569	can	0.570355	0.602911
FBgn0011570	cpb	0.00661477	0.952361
FBgn0011573	Cdc37	0.185196	0.0667144
FBgn0011576	Cyp4d2	-0.0747314	0.721091
FBgn0033374	Boot	1.51023	0.049842	Group Up
FBgn0011582	Dop1R1	0.459265	0.00040527
FBgn0011584	Trp1	-0.418886	0.000172249
FBgn0011586	e(r)	0.0151665	0.909022
FBgn0011589	Elk	0.547832	1.04714e-05
FBgn0011591	fng	-0.250269	0.0118157
FBgn0011592	fra	0.207538	0.264601
FBgn0011596	fzo	0.0389436	0.954463
FBgn0011603	ine	-0.479807	0.022728
FBgn0011604	Iswi	0.332329	0.000115815
FBgn0011606	Klp3A	0.18222	0.403913
FBgn0011638	La	0.205823	0.0111245
FBgn0011640	lark	0.263172	0.00247889
FBgn0011642	Zyx	0.289222	0.0101223
FBgn0011648	Mad	-0.117596	0.304943
FBgn0011655	Med	0.358122	0.000177421
FBgn0011656	Mef2	-0.00750083	0.953934
FBgn0011659	Mlh1	0.242685	0.133677
FBgn0011660	Pms2	0.625049	7.32392e-08
FBgn0011661	Moe	-0.0132135	0.909897
FBgn0011666	msi	0.178442	0.29245
FBgn0011672	Mvl	-0.0969627	0.496396
FBgn0011674	insc	-0.445122	0.0600171
FBgn0011676	Nos	0.460291	1.19767e-05
FBgn0011692	pav	0.958407	0.120574
FBgn0011693	Pdh	-0.819072	9.07234e-07
FBgn0011695	EbpIII	-0.711033	0.00223497
FBgn0011701	repo	-0.0272191	0.817308
FBgn0011703	RnrL	0.0213825	0.955717
FBgn0011704	RnrS	-0.743194	0.0120301
FBgn0266102	CR44839	1.48243	0.0478387	Group Up
FBgn0011706	rpr	0.215282	0.449449
FBgn0011708	Syx5	-0.125812	0.0721161
FBgn0011710	Septin1	-0.00755275	0.938181
FBgn0011715	Snr1	0.33644	0.00615562
FBgn0011722	Tig	-0.41731	0.249541
FBgn0011723	byn	1.43353	0.246669
FBgn0011725	twin	0.232056	0.00286534
FBgn0011726	tsr	-0.111956	0.299035
FBgn0011737	Wee1	0.292159	0.000367722
FBgn0011739	wts	-0.124248	0.380627
FBgn0011740	alpha-Man-IIa	0.0445569	0.744774
FBgn0011741	Arp6	0.124024	0.40279
FBgn0011742	Arp2	0.208915	0.0647909
FBgn0011745	Arp1	-0.0476489	0.718378
FBgn0011746	ana	-0.00901708	0.963063
FBgn0011747	Ank	0.0925783	0.501449
FBgn0011754	PhKgamma	-0.00605157	0.962215
FBgn0011758	B-H1	-0.330963	0.117512
FBgn0011760	ctp	0.00863105	0.962619
FBgn0011761	dhd	-2.60504	0.0827685
FBgn0011762	Prim1	-0.0125801	0.960659
FBgn0011763	Dp	0.0839854	0.380196
FBgn0011766	E2f1	0.112724	0.511132
FBgn0039198	CG5768	1.45681	0.0143558	Group Up
FBgn0011769	Fdx1	0.354353	0.0326108
FBgn0039202	CG13622	1.45129	0.0165177	Group Up
FBgn0011771	Hem	0.0467223	0.614795
FBgn0011774	Irbp	0.507406	5.35597e-05
FBgn0011785	BRWD3	0.297277	0.00139494
FBgn0011787	mRpL12	0.110842	0.400484
FBgn0011802	Gem3	0.182704	0.357319
FBgn0011817	nmo	0.418837	0.0517721
FBgn0011818	oaf	0.198173	0.527479
FBgn0011824	CG4038	-0.43973	0.0244511
FBgn0011826	Pp2B-14D	0.126875	0.254724
FBgn0011828	Pxn	0.219759	0.0336215
FBgn0011829	Ret	-0.0590549	0.808609
FBgn0011836	Taf2	0.294474	0.0142884
FBgn0011837	Tis11	-0.63193	0.000530837
FBgn0011889	tRNA:Lys-CTT-1-2	0.739845	0.430825
FBgn0012034	AcCoAS	-0.856762	9.28697e-08
FBgn0266263	asRNA:CR44958	1.44532	0.005747	Group Up
FBgn0012037	Ance	-0.575444	0.0354291
FBgn0012042	AttA	-0.361682	0.784727
FBgn0012051	CalpA	-0.0570969	0.538649
FBgn0012058	Cdc27	0.0926617	0.29574
FBgn0012344	Dh44	0.56731	1.36499e-06
FBgn0013263	Trl	-0.606604	0.00453079
FBgn0013269	Fkbp39	0.205938	0.142474
FBgn0030455	CG4318	1.44171	0.00569232	Group Up
FBgn0028374	Hug	1.42027	7.95615e-11	Group Up
FBgn0260780	wisp	1.41953	9.77764e-11	Group Up
FBgn0013277	Hsp70Ba	0.724249	0.524579
FBgn0267776	asRNA:CR46107	1.41087	0.0141525	Group Up
FBgn0085243	CG34214	1.40705	0.00757169	Group Up
FBgn0013303	Nca	0.129145	0.52308
FBgn0013305	Nmda1	-0.4531	0.00465035
FBgn0283442	vas	1.4065	0.020313	Group Up
FBgn0013308	Odc2	-0.0135406	0.991682
FBgn0013323	Ptth	0.731112	0.00549355
FBgn0013325	RpL11	-0.751431	0.000111208
FBgn0013334	Sap47	0.286999	0.0616813
FBgn0013342	nSyb	0.0212012	0.876813
FBgn0013343	Syx1A	0.407196	0.052561
FBgn0013347	TfIIA-S	-0.00361515	0.984125
FBgn0037626	CG8236	1.40102	0.00124918	Group Up
FBgn0013432	bcn92	0.371227	0.00406964
FBgn0013433	beat-Ia	0.437946	1.88974e-05
FBgn0013435	Cdc2rk	0.122765	0.278171
FBgn0013467	igl	0.104184	0.460135
FBgn0013469	klu	-0.353282	0.110643
FBgn0013531	MED20	0.173177	0.0648733
FBgn0013548	l(2)dtl	0.655386	1.75814e-13
FBgn0013563	Pex1	-0.398619	0.00297341
FBgn0013576	mtd	0.0869389	0.513832
FBgn0035607	CG4835	1.38569	0.0398158	Group Up
FBgn0035928	CG13310	1.37782	0.029595	Group Up
FBgn0032525	Hsp60D	1.37359	0.00359179	Group Up
FBgn0034741	CG4269	1.37119	0.00334184	Group Up
FBgn0039782	CG15539	1.37077	0.00288743	Group Up
FBgn0013679	mt:ND1	-0.988219	0.0109086
FBgn0013680	mt:ND2	-0.716993	0.307578
FBgn0013681	mt:ND3	-1.26208	0.0732108
FBgn0013683	mt:ND4L	-0.706077	0.219634
FBgn0031886	Nuf2	1.35893	0.000525372	Group Up
FBgn0013685	mt:ND6	-0.721355	0.33438
FBgn0013686	mt:lrRNA	-0.262674	0.617059
FBgn0013688	mt:srRNA	-0.992707	0.0917569
FBgn0013703	mt:tRNA:Gln-TTG	-0.156365	0.87738
FBgn0013707	mt:tRNA:Thr-TGT	-0.234376	0.849447
FBgn0013710	mt:tRNA:Tyr-GTA	-0.514647	0.56431
FBgn0013717	not	0.151858	0.0297664
FBgn0013718	nuf	-0.541095	6.01773e-06
FBgn0013720	pck	-0.278254	0.0251236
FBgn0013725	phyl	0.505222	7.70583e-05
FBgn0013726	pnut	0.475844	7.86299e-11
FBgn0013732	sced	0.3231	0.00348572
FBgn0013733	shot	-0.0485072	0.748096
FBgn0013746	alien	0.0793163	0.557596
FBgn0013749	Arf4	-0.19098	0.252022
FBgn0013750	Arf6	0.0122523	0.916574
FBgn0013751	Awh	0.282528	0.0695958
FBgn0013753	Bgb	0.292048	0.0632446
FBgn0013756	Mtor	0.283839	0.00341105
FBgn0013759	CASK	0.40704	0.00234724
FBgn0013762	Cdk5	-0.145459	0.106367
FBgn0013763	Idgf6	-0.621379	0.304799
FBgn0013764	Chi	0.206961	0.0357224
FBgn0013765	cnn	-0.0520458	0.659838
FBgn0013767	Crz	0.714348	0.00691814
FBgn0013770	Cp1	-0.637692	0.000244991
FBgn0013771	Cyp6a9	-0.756759	8.11355e-05
FBgn0029810	CG12239	1.35597	4.66721e-12	Group Up
FBgn0037627	CG13318	1.3492	0.0011545	Group Up
FBgn0013799	Deaf1	0.35112	0.00213079
FBgn0013810	Dhc36C	0.573022	0.0737859
FBgn0013811	Dhc62B	-0.029161	0.949914
FBgn0013812	Dhc93AB	-0.184596	0.314928
FBgn0013813	Dhc98D	-0.11533	0.828517
FBgn0032069	LManVI	1.33832	0.00905756	Group Up
FBgn0013953	Esp	-0.519401	0.0441496
FBgn0013954	Fkbp12	-0.234847	0.105439
FBgn0013972	Gycalpha99B	0.300561	0.056089
FBgn0013973	Gycbeta100B	0.490864	3.15357e-10
FBgn0013981	His4r	0.00681734	0.982356
FBgn0013983	imd	-0.268874	0.0861199
FBgn0013987	MAPk-Ak2	-0.283866	0.000228548
FBgn0013995	Calx	-0.264401	0.033554
FBgn0013997	Nrx-IV	-0.172094	0.163176
FBgn0265531	asRNA:CR44381	1.32882	0.0157122	Group Up
FBgn0014006	Ask1	-0.0943297	0.37343
FBgn0014007	Ptp69D	0.318289	0.00191193
FBgn0014009	Rab2	-0.112377	0.149273
FBgn0014010	Rab5	-0.126155	0.295639
FBgn0014011	Rac2	-0.582666	0.000251203
FBgn0014018	Rel	-0.0666756	0.803208
FBgn0033885	DJ-1alpha	1.32343	6.36198e-06	Group Up
FBgn0014020	Rho1	-0.275452	0.00359367
FBgn0014022	Rlb1	0.236789	0.00274622
FBgn0014023	mRpL47	0.0491817	0.768899
FBgn0014024	Rnp4F	0.371086	0.005116
FBgn0014026	RpL7A	-0.348841	0.0385989
FBgn0014028	SdhB	-0.260945	0.0251741
FBgn0014029	Septin2	0.257498	0.0279523
FBgn0051832	CG31832	1.31777	0.00411825	Group Up
FBgn0014032	Sptr	-0.27504	0.00439668
FBgn0014033	Sr-CI	0.182808	0.807593
FBgn0014037	Su(Tpl)	0.265314	0.0173407
FBgn0014073	Tie	-0.441121	0.00165656
FBgn0014075	Uggt	-0.508297	0.000220986
FBgn0014076	Vm32E	2.40367	0.0577363
FBgn0014092	CG4278	0.0695843	0.674208
FBgn0014127	barr	0.422323	0.0166133
FBgn0014133	bif	-0.175955	0.155173
FBgn0014135	bnl	0.453438	0.4634
FBgn0014141	cher	-0.673195	6.02918e-06
FBgn0014143	croc	0.354602	0.0294162
FBgn0014163	fax	0.296952	0.0405793
FBgn0014179	gcm	0.825072	0.00546413
FBgn0014184	Oda	-0.498555	7.4263e-05
FBgn0014189	Hel25E	0.231814	0.0462768
FBgn0014269	prod	0.156323	0.0599906
FBgn0014340	mof	0.308726	0.0135871
FBgn0014342	mia	-0.14854	0.487154
FBgn0014343	mirr	0.205627	0.164339
FBgn0014366	noi	0.150247	0.0663711
FBgn0014368	nol	0.380944	0.323165
FBgn0014380	RhoL	-0.234075	0.0640589
FBgn0014388	sty	0.45718	0.00132886
FBgn0014391	sun	-0.701249	2.20818e-06
FBgn0014395	tilB	0.086734	0.898847
FBgn0014396	tim	0.126657	0.771648
FBgn0014411	Vps26	-0.00178613	0.982473
FBgn0014417	CG13397	-0.585475	0.104156
FBgn0014427	CG11899	-0.797195	0.00797253
FBgn0014454	Acp1	-1.44351	0.157972
FBgn0014455	Ahcy	-0.678852	0.00927931
FBgn0014464	Cp7Fa	0.735672	0.00567986
FBgn0265104	lncRNA:CR44206	1.2956	7.61034e-05	Group Up
FBgn0014466	Cp7Fc	1.31703	0.0832706
FBgn0014469	Cyp4e2	-0.95709	0.1181
FBgn0014857	His3.3A	0.0105424	0.957298
FBgn0014859	Hr38	-0.541966	0.0642893
FBgn0014861	Mcm2	-0.672897	0.0350379
FBgn0266965	lncRNA:CR45416	1.2805	0.000689308	Group Up
FBgn0263143	vret	1.26636	1.5014e-07	Group Up
FBgn0014868	Ost48	-0.0939406	0.66271
FBgn0014869	Pglym78	-0.371823	0.00124196
FBgn0014870	Psi	0.202178	0.271024
FBgn0014877	Roe1	0.0455937	0.721885
FBgn0014879	Set	0.190957	0.040725
FBgn0014906	Hydr2	-0.0190784	0.892313
FBgn0014930	CG2846	-0.682006	2.85924e-09
FBgn0029924	CG4586	1.26629	2.52912e-05	Group Up
FBgn0015000	betaggt-I	0.0882925	0.338394
FBgn0015001	iotaTry	0.0187728	0.990626
FBgn0015010	Ag5r	0.408841	0.535437
FBgn0015011	AhcyL2	-0.763185	6.72561e-05
FBgn0015019	CCT3	0.193445	0.0863621
FBgn0015024	CkIalpha	0.00700332	0.969236
FBgn0015025	CkIIalpha-i1	0.00509391	0.979216
FBgn0015031	cype	-0.410815	0.00123957
FBgn0015032	Cyp4c3	-0.984146	0.00453853
FBgn0015033	Cyp4d8	-0.580381	0.233369
FBgn0015034	Cyp4e1	-0.38832	0.401425
FBgn0015035	Cyp4e3	-0.889643	0.225713
FBgn0015036	Cyp4ae1	-0.804793	5.11459e-06
FBgn0015037	Cyp4p1	-0.625444	0.0987341
FBgn0015038	Cyp9b1	-1.18404	0.10085
FBgn0015039	Cyp9b2	-0.551712	0.564915
FBgn0015040	Cyp9c1	-0.0824203	0.80633
FBgn0015075	Ddx1	0.196595	0.0174827
FBgn0015218	eIF4E1	-0.135263	0.0242145
FBgn0015221	Fer2LCH	-0.344945	2.8659e-05
FBgn0015222	Fer1HCH	-0.261148	0.00558628
FBgn0015229	glec	0.0926725	0.440466
FBgn0015239	Hr78	-0.131097	0.0827416
FBgn0015240	Hr96	0.0710361	0.451909
FBgn0015245	Hsp60A	0.108485	0.322723
FBgn0015247	Diap2	0.139372	0.0807321
FBgn0015268	Nap1	-0.219863	0.0648733
FBgn0015269	Nf1	0.0738333	0.62945
FBgn0015270	Orc2	-0.483536	0.40148
FBgn0015271	Orc5	0.0943653	0.850425
FBgn0015277	Pi3K59F	0.0812078	0.483913
FBgn0015278	Pi3K68D	-0.198764	0.266878
FBgn0015279	Pi3K92E	-0.0568896	0.666969
FBgn0015282	Rpt2	0.184273	0.440937
FBgn0015283	Rpn10	0.245905	0.17085
FBgn0015286	Rala	-0.10614	0.407607
FBgn0015288	RpL22	-0.416597	0.0440706
FBgn0015295	Shark	-0.403382	0.00870471
FBgn0015296	Shc	0.176213	0.00727927
FBgn0015298	Srp19	0.136726	0.324437
FBgn0015299	Ssb-c31a	0.440173	0.221624
FBgn0015300	Ssl	0.191977	0.902138
FBgn0015316	Try29F	0.402127	0.051728
FBgn0015320	Ubc2	0.0740405	0.460444
FBgn0015321	Ubc4	-0.062357	0.312762
FBgn0015331	abs	0.127779	0.324271
FBgn0015336	CG15865	-1.0973	0.196365
FBgn0015338	CG5861	-0.400324	0.00266229
FBgn0015351	Mettl4	0.32581	0.0490655
FBgn0015359	CG2034	0.0356268	0.765461
FBgn0015360	oxt	0.0859493	0.505717
FBgn0015371	chn	0.501223	1.59155e-07
FBgn0015372	RabX1	-0.157181	0.192149
FBgn0015376	cutlet	-0.401985	0.166793
FBgn0015379	dod	0.272868	0.00248006
FBgn0015380	drl	0.370278	0.002235
FBgn0015381	dsf	0.416429	0.0159891
FBgn0015391	glu	0.537007	5.15577e-08
FBgn0015396	jumu	0.458945	0.000626934
FBgn0015399	kek1	0.526449	0.00718439
FBgn0015400	kek2	0.310908	0.00679108
FBgn0015402	ksr	0.32331	1.89227e-05
FBgn0015477	Rme-8	0.155747	0.129527
FBgn0015509	Cul1	-0.0417439	0.602224
FBgn0015513	mbc	-0.364769	0.0245929
FBgn0015519	nAChRalpha3	0.583935	0.0164798
FBgn0015520	nonA-l	0.205963	0.0353605
FBgn0015521	RpS21	-0.317871	0.137983
FBgn0026085	dgt4	1.24129	0.00177013	Group Up
FBgn0015524	otp	0.752181	8.06406e-09
FBgn0015527	peng	0.297775	0.0143558
FBgn0015543	snoRNA:Me28S-A1322	-0.498632	0.148153
FBgn0015544	spag	0.358671	0.0110447
FBgn0015546	spel1	-0.0919339	0.538998
FBgn0034505	CG16739	1.23313	0.000192696	Group Up
FBgn0015553	tos	0.675415	0.00235563
FBgn0015558	tty	0.524901	2.85965e-05
FBgn0015561	unpg	0.444359	0.199395
FBgn0015568	alpha-Est1	-0.985104	0.000328248
FBgn0040342	CG3706	1.22817	0.000266824	Group Up
FBgn0030938	CG15047	1.22714	0.00599796	Group Up
FBgn0015571	alpha-Est3	-0.634953	0.00106211
FBgn0015572	alpha-Est4	-0.439018	0.137057
FBgn0058354	CR40354	1.22605	0.0116259	Group Up
FBgn0030949	Cyp308a1	1.21976	0.0183639	Group Up
FBgn0015577	alpha-Est9	-0.312475	0.00341915
FBgn0015582	dare	0.217376	0.0732959
FBgn0015584	Acp53Ea	0.483077	0.745401
FBgn0015585	Acp63F	-1.75789	0.0878008
FBgn0015589	Apc	0.30395	0.011741
FBgn0015591	AstA	0.331942	8.5e-05
FBgn0015600	toc	0.171407	0.0937208
FBgn0015602	BEAF-32	0.185908	0.0253374
FBgn0015609	CadN	0.239358	0.16013
FBgn0015614	CanB2	0.00815282	0.965136
FBgn0015615	SMC3	0.277362	0.00139837
FBgn0015618	Cdk8	0.245804	0.184526
FBgn0015621	Clp	0.39731	0.00238752
FBgn0267641	lncRNA:CR45979	1.21965	0.00580377	Group Up
FBgn0015623	Cpr	0.535653	0.489495
FBgn0015625	CycB3	0.762714	0.0330273
FBgn0015663	Ugt36A1	-0.755415	0.000765509
FBgn0015664	Dref	0.00118837	0.991652
FBgn0015714	Cyp6a17	-0.506346	0.594586
FBgn0015721	ktub	0.196955	0.0580521
FBgn0015737	Hmu	-0.0404415	0.89904
FBgn0015754	Lis-1	0.00249166	0.986069
FBgn0015756	RpL9	-0.615982	0.0006324
FBgn0015765	p38a	-0.208828	0.0767274
FBgn0015766	Msr-110	-0.438942	0.0357437
FBgn0015772	Nak	-0.0163972	0.908926
FBgn0015773	NetA	0.127302	0.733247
FBgn0015774	NetB	0.340176	0.091645
FBgn0265585	lncRNA:CR44412	1.21708	0.0409428	Group Up
FBgn0015777	nrv2	-0.651169	5.36022e-08
FBgn0015778	rin	0.379089	0.000283655
FBgn0015781	P5cr	-0.0991727	0.377449
FBgn0015789	Rab10	-0.271237	0.00255654
FBgn0015790	Rab11	-0.038341	0.6131
FBgn0015791	Rab14	-0.111813	0.618421
FBgn0015793	Rab19	-0.0142627	0.942128
FBgn0015794	Rab18	-0.347103	0.0123871
FBgn0015795	Rab7	-0.296049	0.0228654
FBgn0015797	Rab6	-0.187844	0.0143396
FBgn0015799	Rbf	0.282486	0.000219361
FBgn0015801	Reg-5	-0.474107	0.0367862
FBgn0015803	RtGEF	0.224135	0.000639712
FBgn0015805	HDAC1	0.506059	5.82255e-08
FBgn0015808	ScpX	-0.633742	9.73083e-06
FBgn0015818	Spx	0.253597	0.0106731
FBgn0015828	TfIIEalpha	0.142866	0.149273
FBgn0015829	TfIIEbeta	0.0326523	0.70227
FBgn0015831	Rtnl2	-0.467636	0.685374
FBgn0015834	eIF3i	-0.389646	0.00060306
FBgn0015838	Vang	0.237082	0.0272209
FBgn0015872	Drip	-0.860606	0.000405241
FBgn0015903	apt	-0.30621	0.0713082
FBgn0015904	ara	0.311925	0.0077831
FBgn0015905	ast	-0.0958007	0.661293
FBgn0015919	caup	0.252762	0.0252855
FBgn0015924	crq	-0.852237	2.07773e-10
FBgn0015925	csul	-0.0216438	0.911465
FBgn0015926	dah	0.537935	0.171467
FBgn0015929	dpa	0.353661	0.211716
FBgn0015946	grim	0.267685	0.361887
FBgn0015949	hrg	0.30162	0.000995729
FBgn0031108	CG15459	1.20926	0.0241355	Group Up
FBgn0016031	lama	0.0716124	0.942128
FBgn0016032	lbm	0.0926283	0.254665
FBgn0016034	mael	0.896033	0.000821393
FBgn0016036	mei-P22	0.60858	0.352998
FBgn0016038	Vsp37A	-0.24764	0.00723704
FBgn0016041	Tom40	-0.243521	0.0303569
FBgn0016047	nompA	0.154417	0.599634
FBgn0000147	aurA	1.20924	2.04068e-05	Group Up
FBgn0016054	phr6-4	0.518824	0.00886283
FBgn0016059	Sema1b	-0.136434	0.335184
FBgn0016061	side	0.43635	0.01125
FBgn0016070	smg	-0.163196	0.306178
FBgn0016075	vkg	-0.615352	0.0487501
FBgn0016076	vri	0.123486	0.787298
FBgn0016078	wun	-0.126201	0.0913458
FBgn0016081	fry	-0.0415437	0.782941
FBgn0016119	ATPsynCF6	-0.350289	0.0368288
FBgn0016120	ATPsynD	-0.458965	0.000333911
FBgn0034907	CG5539	1.20647	0.0410506	Group Up
FBgn0016123	Alp4	-0.178264	0.318117
FBgn0016126	CaMKI	0.0198476	0.903242
FBgn0016131	Cdk4	-0.601078	0.129876
FBgn0016641	PTP-ER	0.357737	5.36028e-09
FBgn0016650	Lgr1	-0.306828	0.133479
FBgn0016660	H15	-0.0126742	0.957391
FBgn0016672	Ipp	-0.207195	0.183221
FBgn0016675	Lectin-galC1	0.520148	0.410103
FBgn0016684	NaPi-T	-0.153173	0.724964
FBgn0016685	Nlp	0.217685	0.071369
FBgn0016687	Nurf-38	-0.593552	9.22169e-05
FBgn0016691	ATPsynO	-0.592776	3.42529e-06
FBgn0016693	Past1	-0.367017	0.000212082
FBgn0016694	Pdp1	0.158455	0.400123
FBgn0016696	Pitslre	0.703221	2.36212e-07
FBgn0016697	Prosalpha5	0.00257929	0.992092
FBgn0016698	Ptpa	0.226245	0.0430552
FBgn0016701	Rab4	0.101275	0.448322
FBgn0037879	scpr-C	1.2034	0.0149803	Group Up
FBgn0016726	RpL29	-0.454879	0.0189659
FBgn0016754	sba	0.236499	0.0508051
FBgn0016756	Usp47	-0.00359615	0.977857
FBgn0016762	angel	-0.0132024	0.943825
FBgn0016794	dos	0.0386427	0.758324
FBgn0016797	fz2	-0.282425	0.0813937
FBgn0016917	Stat92E	-0.58222	0.000704965
FBgn0016919	nompB	0.82387	0.199395
FBgn0016920	nompC	-0.136143	0.41149
FBgn0016926	Pino	-0.337988	0.00566594
FBgn0016930	Dyrk2	-0.194115	0.21834
FBgn0016970	l(2)k10201	0.278824	0.173521
FBgn0016974	swaPsi	0.596731	0.345027
FBgn0016977	spen	0.635859	0.000727756
FBgn0016978	snRNP-U1-70K	0.360352	0.000155317
FBgn0016983	smid	-0.0535318	0.631888
FBgn0016984	sktl	-0.280941	0.020677
FBgn0017414	cag	0.224211	0.262536
FBgn0017418	ari-1	0.00588885	0.966949
FBgn0051659	CG31659	1.19838	0.0418221	Group Up
FBgn0017429	CG5989	-0.259746	0.00046785
FBgn0017430	Nelf-E	0.402131	1.9907e-06
FBgn0017456	Ubc84D	-0.929335	0.0619788
FBgn0017457	U2af38	0.28819	0.0349504
FBgn0030501	BthD	1.19334	0.000681285	Group Up
FBgn0017545	RpS3A	-0.81328	3.76778e-16
FBgn0017550	Rga	0.303281	0.000148053
FBgn0017551	Rca1	0.343849	0.00322706
FBgn0017556	Prosalpha4T2	0.557987	0.627447
FBgn0017558	Pdk	-0.451713	0.00389109
FBgn0017561	Ork1	-0.573976	0.000359479
FBgn0017566	ND-75	-0.370636	3.9585e-05
FBgn0017567	ND-23	-0.252246	0.0362251
FBgn0017572	Mo25	-0.229041	0.0293801
FBgn0017577	Mcm5	-0.272519	0.280378
FBgn0017578	Max	0.298648	0.0118195
FBgn0017579	RpL14	-0.599066	9.92793e-05
FBgn0017581	Lk6	-0.302905	0.180342
FBgn0017590	klg	0.395633	0.0292362
FBgn0019624	COX5A	-0.534449	0.00019514
FBgn0019637	Atu	0.376117	5.2216e-06
FBgn0019644	ATPsynB	-0.573697	5.2216e-06
FBgn0019650	toy	0.115356	0.409169
FBgn0019660	lncRNA:roX2	0.556646	0.0132562
FBgn0019661	lncRNA:roX1	0.878727	1.87228e-07
FBgn0019662	qm	0.0265117	0.805954
FBgn0019686	lok	-0.0231372	0.936458
FBgn0019809	gcm2	0.766053	0.00440581
FBgn0019828	dj	-1.66223	0.112868
FBgn0019830	colt	-0.917597	0.000155098
FBgn0019890	Smg5	0.0975194	0.238062
FBgn0019925	Surf4	-0.585518	8.71472e-08
FBgn0019929	Ser7	-0.986978	1.24564e-05
FBgn0019932	SamDC	-0.578567	0.00069734
FBgn0019936	RpS20	-0.783843	0.000366893
FBgn0019938	Polr1A	0.0479146	0.677603
FBgn0019940	Rh6	-0.75158	0.0028015
FBgn0019949	Cdk9	0.0185745	0.901207
FBgn0019952	Orct	-0.356185	0.114415
FBgn0019957	ND-42	-0.514667	6.13119e-06
FBgn0019960	Mitofilin	-0.414042	8.9214e-09
FBgn0019968	Khc-73	0.131246	0.283578
FBgn0019972	Drice	-0.213021	0.219661
FBgn0019982	Gs1l	-0.157098	0.370296
FBgn0019985	mGluR	0.221089	0.238858
FBgn0019990	Gcn2	0.000266256	0.999508
FBgn0020018	Ppox	-0.0341093	0.835861
FBgn0020224	Cbl	0.347191	0.000180411
FBgn0020235	ATPsyngamma	-0.664227	1.06065e-09
FBgn0020236	ATPCL	-0.355945	0.00178847
FBgn0020238	14-3-3epsilon	-0.0964351	0.339765
FBgn0020248	stet	0.684501	0.000508828
FBgn0020249	stck	0.0925466	0.613084
FBgn0020251	sfl	-0.199107	0.132115
FBgn0020255	Ran	-0.0928543	0.34347
FBgn0020257	Ppa	-0.0337885	0.786906
FBgn0020258	ppk	0.127825	0.487867
FBgn0020261	pcm	0.344714	5.95501e-05
FBgn0020269	mspo	0.358479	1.0927e-06
FBgn0020270	mre11	0.502969	0.208284
FBgn0020272	mst	-0.130865	0.44305
FBgn0020277	lush	-0.474536	0.376069
FBgn0020278	loco	-0.138373	0.160234
FBgn0020279	lig	-0.0290766	0.848908
FBgn0020294	ko	0.10477	0.272335
FBgn0020299	stumps	-0.373493	0.000116895
FBgn0020300	geko	-0.490921	0.0821825
FBgn0020304	drongo	-0.42456	0.00663853
FBgn0020305	dbe	0.239451	0.033903
FBgn0020306	dom	0.124852	0.381836
FBgn0020307	dve	-0.0500952	0.804707
FBgn0020309	crol	0.157403	0.189069
FBgn0020312	Tmtc3	0.262844	0.000541405
FBgn0020369	Rpt6	0.0916196	0.667811
FBgn0020370	TppII	0.258535	0.0909787
FBgn0020372	TM4SF	-0.0596622	0.759103
FBgn0020377	Sr-CII	0.186788	0.81462
FBgn0020378	Sp1	0.378914	0.0362419
FBgn0020379	Rfx	0.362619	0.000505247
FBgn0020381	Dredd	0.0381193	0.837826
FBgn0283545	vilya	1.18626	0.0310921	Group Up
FBgn0020386	Pdk1	-0.344458	0.0104762
FBgn0020388	Gcn5	0.18096	0.0128257
FBgn0020389	Papss	0.0787202	0.483272
FBgn0020391	Nrk	0.467827	4.18095e-07
FBgn0020392	Nmt	-0.174008	0.15377
FBgn0020399	Mst89B	-0.148262	0.886137
FBgn0020407	asun	0.0231239	0.875556
FBgn0020412	JIL-1	0.260365	0.00754065
FBgn0020414	Idgf3	-0.201446	0.231297
FBgn0040837	CG8620	1.18193	0.0197208	Group Up
FBgn0020416	Idgf1	-0.794486	0.0479224
FBgn0020429	GluRIIB	-0.921143	0.196365
FBgn0020440	Fak	0.235899	0.0238737
FBgn0020443	eRF3	-0.325498	0.0271862
FBgn0020445	E23	-0.273518	0.102553
FBgn0020493	Dad	-0.319831	0.00200545
FBgn0020496	CtBP	0.378689	0.000351701
FBgn0020497	emb	-0.0262677	0.872388
FBgn0020503	CLIP-190	-0.0751452	0.731691
FBgn0020506	Amyrel	-1.58964	0.157972
FBgn0020508	Ag5r2	0.109964	0.936458
FBgn0020510	Abi	0.11413	0.232421
FBgn0000357	Cp18	1.17688	0.000424017	Group Up
FBgn0020521	pio	-0.651324	0.000375692
FBgn0020545	kraken	0.133646	0.413242
FBgn0020616	SA	0.23071	0.00283038
FBgn0020617	Rx	0.829566	3.72441e-11
FBgn0020618	Rack1	-0.496182	0.00151268
FBgn0020620	RN-tre	0.144627	0.0598053
FBgn0020621	Pkn	-0.382171	0.01503
FBgn0020622	Pi3K21B	-0.104307	0.509779
FBgn0020626	Osbp	-0.0723631	0.402175
FBgn0004360	Wnt2	1.16893	0.0083371	Group Up
FBgn0039780	PH4alphaNE1	1.1644	1.60756e-05	Group Up
FBgn0020641	Lcp65Ad	1.18708	0.404164
FBgn0020642	Lcp65Ac	-0.39826	0.510993
FBgn0020647	KrT95D	0.327468	0.00178843
FBgn0020653	Trxr-1	-0.311438	4.435e-05
FBgn0020655	ArfGAP1	-0.0438883	0.602807
FBgn0020660	eIF4B	0.151981	0.184878
FBgn0020762	Atet	-0.0527573	0.760894
FBgn0020764	Alas	-0.288063	0.0049299
FBgn0020765	Acp65Aa	0.211735	0.748939
FBgn0020767	Spred	0.291602	0.0201077
FBgn0020887	Su(z)12	0.21054	0.0446855
FBgn0020907	Scp2	-0.397127	0.000895884
FBgn0038142	CheA87a	1.16314	7.98029e-05	Group Up
FBgn0020909	Rtc1	0.0366445	0.766368
FBgn0020910	RpL3	-0.376326	0.01599
FBgn0020912	Ptx1	0.785907	1.28093e-07
FBgn0020930	Dgkepsilon	-0.455277	0.000361829
FBgn0021738	Crg-1	0.185346	0.341635
FBgn0085734	CR40450	1.16032	0.0093039	Group Up
FBgn0021750	SerRS-m	0.183726	0.0577441
FBgn0021760	chb	-0.0545044	0.698311
FBgn0021761	Nup154	0.314114	0.00386581
FBgn0021764	sdk	-0.282254	0.0807794
FBgn0021765	scu	-0.832096	0.00236784
FBgn0021768	nudC	0.105401	0.59052
FBgn0021776	mira	0.29469	0.499629
FBgn0021795	Tapdelta	-0.443567	0.00158817
FBgn0021796	Tor	0.176259	0.10599
FBgn0021800	Reph	0.303226	0.0615039
FBgn0021814	Vps28	-0.0634997	0.686999
FBgn0021825	DCTN2-p50	-0.0603665	0.587306
FBgn0021847	Ttc7	0.148297	0.369924
FBgn0021856	l(2)k14505	-0.0421379	0.799866
FBgn0021872	Xbp1	-0.283127	0.0292805
FBgn0021874	Nle	0.220491	0.241307
FBgn0021875	Zfrp8	0.294552	0.0288795
FBgn0021895	ytr	0.233686	0.0302259
FBgn0021906	RFeSP	-0.415995	0.00117966
FBgn0021944	Coprox	0.0373714	0.756459
FBgn0021967	ND-PDSW	-0.390622	0.0168058
FBgn0021979	l(2)k09913	-0.330753	2.26781e-06
FBgn0021995	Rs1	0.29233	0.326697
FBgn0022023	eIF3h	-0.295957	0.0068374
FBgn0022027	Vps25	0.232527	0.331399
FBgn0022029	l(2)k01209	0.0867702	0.307942
FBgn0022069	Nnp-1	0.247897	0.00674917
FBgn0022097	Vha36-1	-0.0540352	0.790456
FBgn0022153	l(2)k05819	0.232578	0.0427997
FBgn0022160	Gpo1	-0.27403	0.0129788
FBgn0022213	Cse1	0.0176315	0.923994
FBgn0022224	ubl	-0.0237342	0.925594
FBgn0022238	lolal	0.193359	0.167713
FBgn0022288	l(2)09851	-0.120975	0.532281
FBgn0022338	dnk	0.192686	0.0774255
FBgn0022343	CG3760	0.0268544	0.793635
FBgn0022344	CG10340	-0.133484	0.295742
FBgn0022349	CG1910	0.0396524	0.799866
FBgn0022355	Tsf1	-0.397135	0.286661
FBgn0022359	Sodh-2	-0.707326	0.229401
FBgn0022361	Pur-alpha	-0.189803	0.334947
FBgn0022382	Pka-R2	0.47582	3.15768e-05
FBgn0022699	D19B	0.336608	2.05822e-05
FBgn0051415	CG31415	1.15618	0.0013019	Group Up
FBgn0022709	Ak1	-0.0299589	0.865399
FBgn0022710	Ac13E	-0.563826	0.0002159
FBgn0022724	Taf8	0.512965	7.59441e-07
FBgn0022740	HLH54F	-0.126048	0.914475
FBgn0022764	Sin3A	0.243417	0.0236488
FBgn0022768	Pp2C1	0.178938	0.0991801
FBgn0022770	Peritrophin-A	-0.778831	0.117502
FBgn0033354	FANCI	1.15003	1.12286e-05	Group Up
FBgn0022786	Hira	0.22899	0.0179842
FBgn0022787	Hel89B	0.103096	0.050238
FBgn0022800	Cad96Ca	-0.511436	0.0183012
FBgn0022893	Df31	0.0341602	0.820516
FBgn0022935	D19A	0.3955	3.36686e-10
FBgn0022936	CycH	0.166265	0.441883
FBgn0022942	Cbp80	0.0456209	0.744688
FBgn0022943	Cbp20	0.21184	0.27786
FBgn0022959	yps	-0.186519	0.353516
FBgn0022960	vimar	0.258303	0.000376635
FBgn0022984	qkr58E-3	0.00793739	0.953087
FBgn0022985	qkr58E-2	-0.0438617	0.751804
FBgn0022986	qkr58E-1	0.460404	0.0166716
FBgn0022987	qkr54B	0.104813	0.48928
FBgn0023000	mth	-0.725622	2.6788e-05
FBgn0023001	melt	-0.354755	0.149452
FBgn0023023	CRMP	0.356784	1.35623e-09
FBgn0023076	Clk	-0.44174	0.00430064
FBgn0023081	gek	0.0447127	0.71295
FBgn0023083	fray	-0.378265	0.00819333
FBgn0023090	dtr	0.470551	0.556677
FBgn0023091	dimm	0.760651	0.00422827
FBgn0023094	cyc	0.0571514	0.457852
FBgn0023095	caps	-0.194906	0.0661839
FBgn0023096	btv	-0.124093	0.791133
FBgn0023097	bon	0.304865	0.000581505
FBgn0038207	CG14356	1.14573	0.036087	Group Up
FBgn0023130	a6	0.277863	0.0441496
FBgn0023143	Uba1	-0.0697131	0.585116
FBgn0023167	SmD3	0.129645	0.258994
FBgn0023169	AMPKalpha	-0.313297	0.00160079
FBgn0023170	RpL39	-0.774396	0.00809676
FBgn0023171	rnh1	0.38358	0.0147068
FBgn0023172	RhoGEF2	-0.0181931	0.917426
FBgn0023174	Prosbeta2	0.00341656	0.98633
FBgn0023175	Prosalpha7	0.0770335	0.693332
FBgn0023177	Pp4-19C	-0.0526155	0.665876
FBgn0023178	Pdf	0.66851	0.00579866
FBgn0023179	amon	0.415307	3.56451e-08
FBgn0023180	Orc6	0.378943	0.274714
FBgn0023181	Orc4	0.166649	0.20413
FBgn0023212	EloB	-0.344393	9.82823e-05
FBgn0023213	eIF4G1	-0.235829	0.0325593
FBgn0023214	edl	-0.123494	0.60039
FBgn0023215	Mnt	0.196606	0.342962
FBgn0023216	Parg	0.239084	0.0732753
FBgn0023388	Dap160	0.142532	0.468242
FBgn0023395	Chd3	0.982293	0.314278
FBgn0023407	B4	0.0122852	0.956799
FBgn0023416	Ac3	0.345757	0.000224619
FBgn0029644	CG14421	1.14223	0.0219536	Group Up
FBgn0023458	Rbcn-3A	0.0201354	0.912604
FBgn0267549	asRNA:CR45889	1.1394	0.0350769	Group Up
FBgn0039454	CG14247	1.10926	0.0199197	Group Up
FBgn0023489	Pph13	-0.388275	0.0140883
FBgn0023495	Lip3	-0.0184414	0.977097
FBgn0267666	lncRNA:CR46004	1.10679	0.00354913	Group Up
FBgn0023506	Es2	0.20189	0.0579704
FBgn0037581	CG7352	1.09418	1.03425e-05	Group Up
FBgn0023508	Ocrl	0.103568	0.18415
FBgn0023509	mip130	0.251204	0.000205883
FBgn0023510	Rbcn-3B	-0.0264918	0.864391
FBgn0023511	Edem1	-0.26255	0.13946
FBgn0023512	eIF2Bepsilon	-0.0607756	0.483156
FBgn0023513	CG14803	0.588025	0.00017897
FBgn0023514	CG14805	-0.0228974	0.85241
FBgn0023515	Gcna	0.908835	1.64761e-16
FBgn0023516	Pex5	-0.574349	1.19279e-05
FBgn0023517	Pgam5	-0.114539	0.350572
FBgn0023518	trr	0.282277	0.00402062
FBgn0023519	mRpL16	0.285662	0.0613436
FBgn0023520	CG3857	0.464115	0.000135434
FBgn0023521	CG3587	0.133488	0.396714
FBgn0023522	CG11596	0.10423	0.347136
FBgn0023523	Or2a	0.426925	0.259028
FBgn0023524	CG3078	0.354277	0.016155
FBgn0023525	CG3191	0.161769	0.238034
FBgn0023526	CG2865	0.341082	0.298886
FBgn0023527	CG3071	0.0763918	0.601656
FBgn0023528	CG2924	0.0309798	0.722696
FBgn0023529	CG2918	0.00443727	0.967063
FBgn0023530	CG3740	-0.500831	0.0135467
FBgn0023531	CG32809	0.640212	1.05853e-05
FBgn0023534	CG17778	0.540962	8.44524e-06
FBgn0031837	DIP-iota	1.09314	0.00755659	Group Up
FBgn0023536	CG3156	0.0415451	0.727817
FBgn0023537	CG17896	-0.6446	9.71405e-08
FBgn0023540	CG3630	-0.460729	0.00297825
FBgn0023541	Cyp4d14	0.765112	0.021587
FBgn0023542	Nmd3	-0.217354	0.0218838
FBgn0023545	PIG-K	0.149532	0.151369
FBgn0023549	Mct1	-0.363962	0.296648
FBgn0023550	FarO	-0.772326	0.27525
FBgn0024150	Ac78C	0.260009	0.0862779
FBgn0024179	wit	-0.0424138	0.675221
FBgn0024183	vig	-0.0492418	0.641365
FBgn0024184	unc-4	0.0378752	0.875556
FBgn0024187	syd	0.0551175	0.724964
FBgn0024188	san	-0.101758	0.225061
FBgn0024189	sns	0.289668	0.0044528
FBgn0024191	sip1	0.365117	0.0528415
FBgn0024194	rasp	-0.668276	0.00250941
FBgn0024196	robl	-0.142965	0.713259
FBgn0024222	IKKbeta	-0.609143	0.000924158
FBgn0024227	aurB	0.931814	0.0893974
FBgn0024230	Hs2st	-0.150307	0.247353
FBgn0024232	gprs	0.356016	0.000399575
FBgn0024234	gbb	-0.18222	0.287556
FBgn0024236	foi	-0.215455	0.0890142
FBgn0024238	Fim	-0.0823497	0.212142
FBgn0024244	drm	-0.29681	0.123543
FBgn0024245	dnt	0.179395	0.211157
FBgn0024248	chico	0.0748743	0.436099
FBgn0024250	brk	-0.224989	0.40301
FBgn0024251	bbx	-0.554237	0.283578
FBgn0024273	WASp	0.158516	0.140901
FBgn0024277	trio	0.226238	0.0515223
FBgn0024285	Srp54	-0.121077	0.447229
FBgn0024288	Sox100B	0.258119	0.602807
FBgn0266705	asRNA:CR45195	1.08783	0.00121282	Group Up
FBgn0024291	Sirt1	0.000181698	0.999508
FBgn0024293	Spn43Ab	-0.846015	0.0234195
FBgn0024294	Spn43Aa	0.200206	0.644851
FBgn0024314	Plap	-0.00258979	0.986824
FBgn0024315	Picot	-0.272361	0.00877718
FBgn0024319	Nach	-0.846135	NA
FBgn0024320	Npc1a	-0.125349	0.364475
FBgn0024321	NK7.1	0.458669	9.44669e-05
FBgn0024326	Mkk4	0.147802	0.202465
FBgn0024329	Mekk1	0.157781	0.217487
FBgn0024330	MED6	0.100555	0.367874
FBgn0024352	Stip1	-0.0565448	0.625344
FBgn0024360	MTPAP	0.194132	0.0580239
FBgn0024361	Tsp2A	-0.788704	0.152124
FBgn0024362	Naa30A	-0.0419851	0.804707
FBgn0024364	CG11417	0.482441	8.5727e-06
FBgn0024365	CG12773	0.0460444	0.732552
FBgn0024366	CG11409	-0.38207	0.345486
FBgn0024371	E2f2	0.490318	0.000406473
FBgn0024432	Dlc90F	0.0261708	0.850693
FBgn0024491	Bin1	0.256057	0.0935456
FBgn0024509	Sec13	-0.0466165	0.640597
FBgn0024510	dlt	0.111599	0.481469
FBgn0024542	Neos	0.198849	0.0914224
FBgn0024555	flfl	0.0877445	0.457303
FBgn0024556	mEFTu1	-0.0372158	0.755384
FBgn0024558	Dph5	0.118777	0.523643
FBgn0024689	fws	0.0184887	0.878145
FBgn0024698	Cpsf160	0.0770467	0.687729
FBgn0024728	Slip1	0.231586	0.0370542
FBgn0024732	Drep1	0.449027	0.000379426
FBgn0024733	RpL10	-0.681979	9.51718e-06
FBgn0024734	PRL-1	-0.43264	0.117354
FBgn0261700	lncRNA:CR42736	1.08617	0.0320534	Group Up
FBgn0024754	Flo1	0.253706	0.00182034
FBgn0024804	Dbp80	0.137972	0.483674
FBgn0024806	DIP2	0.250417	0.021961
FBgn0024807	DIP1	0.57112	1.70704e-07
FBgn0024811	Crk	0.166462	0.28467
FBgn0024814	Clc	-0.0573629	0.537418
FBgn0024833	AP-1mu	-0.0713002	0.360949
FBgn0024836	stan	0.431487	0.000301899
FBgn0024841	Pcd	-0.0393514	0.811792
FBgn0024846	p38b	-0.28447	0.000111233
FBgn0024887	kin17	0.24923	0.0079465
FBgn0024889	Kap-alpha1	-0.125102	0.204364
FBgn0024897	b6	-0.59371	0.249491
FBgn0024909	Taf7	0.380359	1.14749e-05
FBgn0024912	agt	0.3477	0.0473658
FBgn0024913	Actbeta	0.0244725	0.893543
FBgn0037844	CG4570	1.07804	0.00402793	Group Up
FBgn0024921	Tnpo	-0.128368	0.379862
FBgn0024941	RSG7	0.511154	0.00619011
FBgn0024943	PIP82	-0.800378	0.000219545
FBgn0024944	Oamb	0.349512	9.46232e-07
FBgn0024945	NitFhit	-0.466263	4.46349e-05
FBgn0024947	NTPase	-0.238589	0.00772742
FBgn0024956	Mat1	0.552323	3.69654e-06
FBgn0024957	Irp-1B	-0.753944	4.67029e-06
FBgn0024958	Irp-1A	-0.256454	0.00542014
FBgn0024963	GluClalpha	0.509562	0.00299928
FBgn0024973	CG2701	0.187758	0.0515374
FBgn0024975	CG2712	0.368171	0.00223752
FBgn0024980	Syx4	-0.364747	0.00986937
FBgn0024983	CG4293	-0.0585914	0.589646
FBgn0024985	Rilpl	0.350479	1.23058e-05
FBgn0024986	CG3719	0.0694722	0.718037
FBgn0024987	ssx	0.260589	0.0340887
FBgn0024989	CG3777	-0.937503	0.0553519
FBgn0024991	CG2694	0.368075	0.00854225
FBgn0024992	Spg7	0.227443	0.0285759
FBgn0024993	CG2662	0.613292	1.87785e-07
FBgn0024994	Ugalt	0.093417	0.492339
FBgn0024995	CG2680	0.164756	0.3255
FBgn0024996	eIF2Bbeta	-0.0591863	0.632658
FBgn0024997	CG2681	0.020793	0.936855
FBgn0024998	CG2685	0.392708	1.45038e-05
FBgn0025109	Bem46	-0.415763	1.93092e-05
FBgn0025111	Ant2	-0.146678	0.742713
FBgn0025185	az2	0.302065	0.00185274
FBgn0025186	ari-2	0.0436122	0.66155
FBgn0025334	PHDP	0.595657	0.0299068
FBgn0025335	Cpes	-0.426023	3.62855e-07
FBgn0025336	CG4882	0.299508	0.043543
FBgn0025352	Mtpbeta	-0.911177	2.1845e-07
FBgn0025360	Optix	0.136653	0.546332
FBgn0025366	Ip259	-0.268578	0.0626669
FBgn0025373	Fpps	0.00413944	0.983471
FBgn0025381	rush	-0.194914	0.0804368
FBgn0025382	Rab27	0.664944	0.00112723
FBgn0025383	CG14780	-0.111228	0.869459
FBgn0025387	Alms1b	0.511287	0.56886
FBgn0025388	Alms1a	0.637912	7.43473e-09
FBgn0025390	Mur2B	0.159848	0.393492
FBgn0025391	Scgdelta	0.180112	0.0296284
FBgn0025393	CG14795	0.414132	0.363459
FBgn0025394	inc	0.143639	0.122277
FBgn0266220	lncRNA:CR44915	1.07775	0.0438187	Group Up
FBgn0025455	CycT	0.203402	0.197321
FBgn0025456	CREG	-0.908874	4.91973e-06
FBgn0025457	Bub3	0.112303	0.322723
FBgn0025463	Bap60	0.176087	0.016155
FBgn0025469	slv	-0.263417	0.0469051
FBgn0025519	fidipidine	0.420476	0.00187945
FBgn0025525	bab2	0.22859	0.0334187
FBgn0025549	unc-119	0.203892	0.0396559
FBgn0025558	CG4101	0.29723	0.101216
FBgn0025571	SF1	0.692403	9.39407e-08
FBgn0025574	Pli	-0.370977	0.000973183
FBgn0025582	eIF3e	-0.482258	6.06677e-06
FBgn0034692	CG13502	1.07667	3.15768e-05	Group Up
FBgn0025592	Gk1	-0.601801	2.14868e-07
FBgn0011581	Ms	1.07613	1.63533e-10	Group Up
FBgn0025608	Faf2	-0.125095	0.272348
FBgn0025613	CG3081	0.352936	0.664103
FBgn0025615	Torsin	-0.153361	0.43568
FBgn0035670	CG10472	1.07456	3.27379e-05	Group Up
FBgn0025621	CG16989	-0.040505	0.894723
FBgn0025624	CG4025	-0.38845	7.25752e-05
FBgn0025625	Sik2	-0.0300706	0.862824
FBgn0025626	CG4281	0.27091	4.45692e-05
FBgn0025627	CG4194	-0.414246	0.627964
FBgn0025628	CG4199	-0.236083	0.343955
FBgn0025629	CG4045	0.070868	0.587484
FBgn0025630	Rtca	0.398719	0.0677524
FBgn0025631	moody	-0.594505	0.0012841
FBgn0025632	CG4313	0.355894	0.00248749
FBgn0025633	spdi	-0.0797038	0.608851
FBgn0025634	CG13367	0.397838	0.000207921
FBgn0025635	Hinfp	0.262777	0.00117283
FBgn0025637	SkpA	-0.166202	0.0756304
FBgn0025638	Roc1a	-0.0595729	0.575467
FBgn0025639	Hmt4-20	0.189117	0.0736233
FBgn0025640	CG13369	-0.063765	0.713391
FBgn0025641	DAAM	0.0141506	0.915991
FBgn0025642	CG32812	0.828484	0.00462374
FBgn0025643	CG3588	-0.0765268	0.836022
FBgn0025644	CG14424	-0.755344	0.501875
FBgn0025645	CG3598	0.234465	0.843834
FBgn0025674	CycK	0.0402996	0.534212
FBgn0025676	CkIIalpha-i3	0.275256	0.531863
FBgn0025678	CaBP1	-0.0461409	0.719995
FBgn0025680	cry	-0.687043	9.44669e-05
FBgn0025681	CG3558	0.0334878	0.801451
FBgn0025682	scf	-0.247159	0.00994475
FBgn0025684	MFS18	0.0496527	0.583393
FBgn0025686	Amnionless	0.418653	0.213593
FBgn0025692	Lfg	-0.842212	0.000821653
FBgn0025693	ZnT41F	-0.970646	5.63198e-08
FBgn0025697	santa-maria	-0.959598	4.23826e-17
FBgn0025700	CG5885	-0.658964	6.13119e-06
FBgn0025702	Srpk79D	0.263689	0.00129323
FBgn0025709	CNT2	-0.19529	0.549705
FBgn0025712	CG13920	-0.0995949	0.307568
FBgn0025716	Bap55	0.178235	0.20841
FBgn0025720	Ate1	0.199016	0.116134
FBgn0025724	beta'COP	-0.308011	0.00439924
FBgn0025725	alphaCOP	-0.209574	0.0607294
FBgn0025726	unc-13	0.355302	0.0233919
FBgn0025739	pon	1.07029	7.39418e-05	Group Up
FBgn0025740	PlexB	0.134644	0.482768
FBgn0025741	PlexA	-0.0247389	0.9212
FBgn0025742	mtm	-0.0678842	0.521075
FBgn0025743	mbt	0.102022	0.361586
FBgn0025776	ind	-0.269591	0.840393
FBgn0025777	homer	-0.743827	2.05636e-13
FBgn0025781	Cdc16	0.0998126	0.639214
FBgn0025790	TBPH	0.251655	0.00217068
FBgn0025800	Smox	0.205934	0.115277
FBgn0025802	Sbf	0.256614	0.0160464
FBgn0025807	Rad9	0.394895	0.0394883
FBgn0025808	Rad17	0.174419	0.581577
FBgn0025809	Paf-AHalpha	0.163759	0.106651
FBgn0025814	Mgstl	-0.951226	2.2536e-05
FBgn0025815	Mcm6	0.188978	0.415748
FBgn0025820	JTBR	-0.0775863	0.641264
FBgn0025827	CG6421	-0.72867	5.08534e-05
FBgn0025830	IntS8	0.0696562	0.521075
FBgn0025832	Fen1	0.269238	0.293258
FBgn0025833	CG8910	0.282207	0.00728113
FBgn0025835	CG17707	-0.483495	0.598323
[truncated: 10,319 more rows]

## Sheet: Group_VS_Isolated DEG
FlyBaseID	GeneName	log2FoldChange	padj	Remark	Avg. Norm. Expression	73Grp_1	73Grp_2	73Iso_1	73Iso_2	370Grp_1	370Grp_2	370Iso_1	370Iso_2	563Grp_1	563Grp_2	563Iso_1	563Iso_2	360Grp_1	360Grp_2	360Iso_1	360Iso_2	317Grp_1	317Grp_2	317Iso_1	317Iso_2	707Grp_1	707Grp_2	707Iso_1	707Iso_2
FBgn0035619	Alp10	4.30385	0.000303984	Group Up	0.316402	0.0832237	0	0.0387316	0	0	0	0	0	0.369428	0.137664	0.120832	0	0.896785	3.91913	0	0.0275875	0.438837	1.05322	0	0	0.107311	0.277416	0.123489	0
FBgn0031273	CG2839	4.11114	2.70034e-06	Group Up	0.310669	0.22193	0.143306	0	0	0.379327	3.25598	0.0730708	0.156502	0.32838	0.275327	0.0604161	0	0.298928	0.793157	0	0.0275875	0.682635	0.540845	0	0	0.187795	0	0.0308724	0
FBgn0035620	Alp9	3.50055	0.018387	Group Up	0.655576	0.0277412	0.0477688	0.0774632	0	0	0	0	0	0.287333	0.0458879	0.0302081	0	1.64411	7.41835	0	0	0.195039	3.3874	0	0.0437739	0.590212	0.990773	0.895298	0.0524824
FBgn0036655	CG13031	3.44388	0.0130366	Group Up	2.465	0.0832237	0	0	0	13.7317	4.51186	21.8238	18.4986	0.0410475	0.0458879	0.0302081	0.0802277	0	0.0466563	0	0.0275875	0	0	0.0638175	0	0	0.0396309	0.0308724	0.104965
FBgn0040629	CAH5	3.25641	0.000539805	Group Up	4.05298	0.527083	0.525456	2.3239	2.15476	3.945	6.9771	0.63328	0.0313005	40.8833	24.7795	0.0604161	0.133713	1.58432	1.39969	0.0293681	0.0275875	0.585116	1.45174	0.0319088	0.218869	1.50236	5.03313	2.22281	0.20993
FBgn0003060	CG9757	3.00063	1.74867e-06	Group Up	4.34951	1.99737	2.34067	0.619706	0.169001	3.99558	3.20947	0.462781	0.344305	5.7056	1.23897	0.453121	0.454623	11.0006	28.7403	0.440522	0.55175	15.4568	18.588	2.42507	2.32001	1.1536	0.43594	0.710064	1.57447
FBgn0037191	CG14448	2.95644	0.00529229	Group Up	0.722308	0.249671	0.191075	0	0.169001	0.050577	0	0.0730708	0.0939014	0.32838	0.137664	0	0	0.0597857	0	0.0881043	0	0.0975193	0.0853965	0.0319088	0	7.40448	3.80457	2.16107	2.30923
FBgn0043791	phu	2.91121	0.000878698	Group Up	85.7107	8.37785	6.40101	7.04915	11.1541	9.98895	9.53537	1.5832	2.34754	599.909	757.196	5.34683	12.7562	44.5104	87.6672	20.029	20.4975	93.9111	211.527	28.6541	77.7861	1.85112	8.40175	13.1516	17.4242
FBgn0053127	CG33127	2.84601	0.018387	Group Up	0.0746651	0.0832237	0.0955375	0	0.0845004	0	0	0.0487138	0.0313005	0.32838	0.688319	0	0	0.0597857	0.0466563	0	0	0.146279	0.0284655	0.0319088	0	0	0.118893	0	0
FBgn0030009	CG15336	2.84424	0.0177526	Group Up	0.0755672	0.138706	0.0955375	0	0	0.0758655	0.744224	0.0487138	0	0.0410475	0.275327	0	0	0.0298928	0	0.0293681	0	0.0975193	0	0	0.131322	0.0268278	0.0792618	0	0
FBgn0264373	lncRNA:CR43825	2.80404	0.0251088	Group Up	0.0939403	0.166447	0.0477688	0	0	0.151731	0.790738	0.170498	0	0.0410475	0	0	0	0.298928	0.186625	0	0.0275875	0	0	0	0	0.24145	0.0792618	0	0.0524824
FBgn0038160	CG9759	2.74932	1.57882e-12	Group Up	42.0072	42.3886	40.2691	20.9925	18.9281	43.0157	59.3519	4.82267	11.769	82.5876	47.494	8.51867	6.15079	110.753	243.872	5.78552	5.87614	95.2276	99.7431	9.4769	12.6506	13.5481	12.1667	6.32883	6.45534
FBgn0037183	CG14451	2.72789	3.14565e-05	Group Up	0.179875	0.471601	1.05091	0.0387316	0	0.151731	0.186056	0.121785	0	0.123143	0.183552	0.0906242	0.0267426	0.0896785	0.37325	0.0587362	0	0.536356	0.170793	0.0638175	0.0437739	0.187795	0.317047	0.0308724	0
FBgn0035665	Jon65Aiii	2.50676	0.0350969	Group Up	0.365317	0.22193	0.0477688	0.154926	1.14076	0.303462	0	0.0243569	0	2.54495	3.90047	0.0604161	0	0.0298928	0	0.0293681	0	0.0487597	0	0.0319088	0.131322	0.0268278	0.0396309	0.0308724	0
FBgn0264710	asRNA:CR43979	2.39154	0.0481545	Group Up	0.0863512	0	0.0477688	0.0774632	0.0422502	0	0.93028	0.0730708	0	0	0.22944	0	0	0.0597857	0.186625	0	0	0.0487597	0.056931	0.0319088	0.0875477	0.160967	0.0396309	0	0
FBgn0039251	Trf4-2	2.3781	1.51541e-05	Group Up	0.364878	0.388377	0.429919	0.0387316	0.169001	2.07366	1.44193	0.31664	0.0939014	0.451523	0.734207	0.0302081	0.0534851	0.20925	0.139969	0.117472	0.055175	0.292558	0.455448	0.127635	0.175095	0.187795	0.713356	0.0617447	0
FBgn0030374	CG15734	2.37204	0.0124774	Group Up	0.0713655	0.166447	0.0955375	0.0387316	0	0.278173	0	0.0243569	0	0.123143	0.0917758	0	0	0.0896785	0.0466563	0.0293681	0.11035	0.341318	0.0853965	0	0	0.160967	0	0.0308724	0
FBgn0267100	lncRNA:CR45540	2.33524	0.00347962	Group Up	0.136922	0.22193	0.525456	0.0387316	0	0.379327	0	0.0730708	0	0.123143	0.183552	0.0302081	0	0.0298928	0.233281	0.146841	0.11035	0.243798	0.683172	0.0319088	0	0.160967	0.0396309	0.0308724	0
FBgn0031622	CG3251	2.27796	0.0164824	Group Up	0.0779954	0.0832237	0	0	0.0422502	0.252885	0	0.0487138	0	0	0.0917758	0.0302081	0	0.119571	0.186625	0.0587362	0	0.0487597	0.540845	0.0319088	0	0.134139	0.118893	0.0308724	0.0524824
FBgn0266616	lncRNA:CR45123	2.27321	1.06163e-05	Group Up	0.26478	0.776754	0.620994	0.193658	0.169001	0.910386	0.418626	0.0730708	0.156502	0.861998	0.458879	0.0302081	0.0267426	0.119571	0.139969	0.0881043	0.0275875	0.292558	0.341586	0.0957263	0.0875477	0.214623	0.198155	0	0.0524824
FBgn0040801	CG13053	2.26733	0.00718439	Group Up	0.205797	0	0	0	0	0.556347	1.44193	0.170498	0.062601	0.32838	0.137664	0.0302081	0	0.20925	0.699844	0.0293681	0.11035	0.243798	0.284655	0	0.0437739	0.0804835	0.198155	0.154362	0.157447
FBgn0266114	asRNA:CR44840	2.26224	0.00209144	Group Up	0.199817	0.277412	0	0.0387316	0	0.177019	0.93028	0.170498	0	0.0410475	0.0458879	0.0604161	0	0.298928	0.186625	0.0293681	0.11035	0.536356	0.683172	0.0638175	0.175095	0.402417	0.475571	0.0926171	0
FBgn0038507	CG5863	2.2526	0.0108131	Group Up	0.298189	0.610307	0.0955375	0.193658	0.126751	0	0	0	0	0.287333	0.183552	0	0	1.01636	1.58631	0.0587362	0.11035	0.585116	0.740103	0.0957263	0	0.429245	0.475571	0.246979	0.314894
FBgn0287620	lncRNA:CR46489	2.24399	5.79976e-05	Group Up	0.610545	0.22193	0.812069	0.271121	0.295752	0.429904	2.13964	0.170498	0.062601	0.82095	0.596543	0.332289	0.0802277	0.149464	1.02644	0.0587362	0	1.07271	1.28095	0.287179	0.218869	0.187795	3.60641	0.216107	0.314894
FBgn0267078	lncRNA:CR45522	2.22771	0.0460324	Group Up	0.1036	0.138706	0.429919	0	0.0422502	0.809232	0	0.0974277	0	0	0.0458879	0	0	0.20925	0.279938	0.0293681	0.11035	0	0	0.0638175	0	0.0804835	0.118893	0.0308724	0
FBgn0038492	Mur89F	2.22577	0.000898355	Group Up	1.03952	0.110965	0.668763	0.116195	0.169001	0.354039	1.39542	0.146142	0	0.0410475	0.0917758	0	0.21394	0.179357	0.37325	0.0881043	0.11035	0.390077	0.540845	0.159544	0.131322	1.71698	2.73453	8.55164	6.66527
FBgn0266691	lncRNA:CR45181	2.21247	7.10306e-06	Group Up	0.715298	0.332895	0.143306	0.271121	0.169001	3.33808	4.04672	0.267926	0.125202	0.861998	0.642431	0.392705	0.160455	0.448393	0.793157	0.264313	0.193113	1.36527	1.19555	0.25527	0.393965	0.37559	0.911511	0.0617447	0.157447
FBgn0267099	lncRNA:CR45539	2.20298	0.00874136	Group Up	0.907475	0.610307	0.191075	0.0774632	0.126751	0.101154	0.744224	0.0730708	0.0939014	2.58599	3.76281	5.98119	6.60541	0.0298928	0	0.0293681	0	0.146279	0.313121	0.0957263	0.0437739	0.0536556	0	0.0617447	0.0524824
FBgn0052580	Muc14A	2.13479	2.62301e-06	Group Up	0.844027	0.471601	0.7643	0.116195	0.0845004	3.86914	1.34891	0.998634	0.344305	2.05238	0.780095	0.0302081	0.347653	0.836999	1.25972	0.0881043	0.413813	1.65783	1.96412	0.319088	0.0875477	0.885318	1.07003	0.308724	0.157447
FBgn0261429	lncRNA:CR42646	2.12922	0.00167601	Group Up	0.313834	0.44386	0.143306	0.193658	0.338002	0.960963	0.790738	0.243569	0	0.246285	0.321215	0.0302081	0	0.149464	0.326594	0	0.055175	1.21899	1.33788	0.0319088	0.175095	0.0804835	0.237785	0.154362	0.0524824
FBgn0040684	CG12589	2.09797	0.0158374	Group Up	0.0995412	0.249671	0	0.0387316	0.0422502	0.227596	0.744224	0.121785	0.062601	0.082095	0	0.0302081	0	0.179357	0.139969	0	0.0275875	0.0975193	0.0853965	0	0.0437739	0.0268278	0.158524	0.0308724	0
FBgn0038530	AttD	2.09767	0.00331756	Group Up	1.02666	0.388377	1.19422	0.23239	0	0.708078	1.44193	0	0	2.21657	0.550655	0.0906242	0.427881	1.55443	5.17885	0.323049	0.496575	1.31651	4.72527	0.861536	1.0068	1.01946	0.0792618	0.0926171	0.734754
FBgn0262825	lncRNA:CR43196	2.09351	0.000563112	Group Up	0.239933	0.360636	0.38215	0.0774632	0.126751	0.151731	1.72102	0.0487138	0.0313005	0.287333	0.0458879	0.241664	0	0.328821	0.233281	0.0881043	0.137938	0.390077	0.483914	0.0957263	0.0437739	0.160967	0.237785	0.0308724	0.0524824
FBgn0000500	Dsk	2.00091	2.27677e-21	Group Up	132.303	136.792	215.007	49.0342	54.1225	235.158	439.278	49.4689	82.1951	166.324	208.01	32.383	41.1835	174.006	278.165	38.0023	37.9052	163.247	203.671	24.2826	30.3791	173.308	206.992	66.7152	69.6442
FBgn0030721	CG12698	1.99717	1.17086e-06	Group Up	0.569112	0.416118	0.334381	0.0774632	0.169001	1.34029	2.46524	0.438425	0.219103	0.944093	0.550655	0.211456	0.240683	0.538071	0.513219	0.293681	0.193113	1.56031	1.28095	0.0319088	0.131322	0.670696	0.634095	0.246979	0.157447
FBgn0051386	lncRNA:CR31386	1.96575	0.00484694	Group Up	0.242571	0.388377	1.62414	0	0.169001	0.50577	1.20936	0.170498	0.156502	0.16419	0.137664	0.0604161	0.0267426	0.0597857	0.186625	0.0587362	0.11035	0.0487597	0.170793	0.0638175	0.131322	0.0268278	0.237785	0.0617447	0.0524824
FBgn0031580	CG15423	1.94746	0.0182823	Group Up	0.439397	0.0554825	0	0.154926	0.126751	0.556347	0	0.0730708	0	0.779903	0.963646	0	0.0534851	0.717428	2.75272	0.0881043	0.717275	0.292558	1.79333	0.319088	0.218869	0.187795	0.475571	0.0617447	0.157447
FBgn0264569	lncRNA:CR43941	1.92934	0.027561	Group Up	0.0847582	0.388377	0.143306	0.0387316	0.0422502	0.227596	0	0.0730708	0	0.0410475	0.22944	0.0906242	0	0.0896785	0.186625	0	0	0.0975193	0.142328	0	0	0.0804835	0.0396309	0.123489	0
FBgn0034730	ppk12	1.90134	0.0299709	Group Up	0.0858179	0.138706	0	0	0	0.252885	0.23257	0.0243569	0	0.0410475	0.367103	0.0604161	0.0534851	0	0	0.0293681	0.0275875	0.146279	0.0853965	0	0.0437739	0.134139	0.277416	0.0926171	0.0524824
FBgn0010019	Cyp4g1	1.8778	0.0229063	Group Up	576.216	2.99605	1.81521	1.23941	0.718254	3.36337	18.4661	2.46005	1.00162	6702.24	7058.62	7.31035	0.962732	8.01128	5.78538	0.146841	0.0827625	0	5.66464	3.15897	1.44454	3.03154	0.634095	0.0308724	0
FBgn0267087	lncRNA:CR45531	1.82315	0.00157197	Group Up	0.275581	0.166447	0.143306	0.0387316	0.0422502	1.44144	0.790738	0.219212	0.0939014	0.410475	0.0917758	0.211456	0.294168	0.298928	0.513219	0.0293681	0.0827625	0.682635	0.341586	0.0638175	0.0875477	0.187795	0.277416	0	0.104965
FBgn0259195	CG42299	1.81583	0.00564908	Group Up	0.285178	0.305153	0.477688	0.0774632	0.126751	1.01154	0	0.194855	0	0.410475	0.275327	0.211456	0	0.149464	1.16641	0.0293681	0.11035	0.341318	0.597776	0.0957263	0	0.107311	0.634095	0.154362	0.367377
FBgn0004379	Klp67A	1.81404	1.94747e-11	Group Up	1.35891	1.71996	1.00314	1.12322	0.887255	2.27596	3.86066	0.340997	0.65731	2.70914	1.74374	0.392705	0.21394	1.73378	3.07932	0.557994	0.524163	1.90163	2.73269	0.478631	0.656608	1.09994	2.14007	0.308724	0.472342
FBgn0267800	lncRNA:CR46125	1.80852	0.00927827	Group Up	0.296354	0.804496	0.191075	0	0	1.36558	1.72102	0.243569	0.438207	0.246285	0.0917758	0.120832	0.187198	0.179357	0.279938	0.0881043	0.055175	0.390077	0.113862	0.0957263	0	0.214623	0.118893	0.0617447	0.104965
FBgn0051371	CG31371	1.78516	0.00847156	Group Up	0.266864	0.499342	0.191075	0	0.169001	0.278173	0	0.121785	0.250404	0.205238	0.596543	0.0302081	0.0267426	0.777214	0.793157	0.146841	0.358638	0.195039	0.768569	0	0	0.37559	0.43594	0.185234	0
FBgn0032503	CG16825	1.76178	0.0242559	Group Up	0.17855	0.249671	0.191075	0.0387316	0.0422502	0	1.34891	0.0974277	0.0313005	0.246285	0.275327	0	0.0802277	0.358714	0	0.0881043	0.137938	0.292558	0.0853965	0.223361	0.0875477	0.0804835	0.277416	0	0.0524824
FBgn0051148	Gba1a	1.75157	0.00377925	Group Up	0.309164	1.10965	0.334381	0.23239	0.0422502	0.556347	1.44193	0.219212	0.281704	0.615713	0.183552	0.241664	0.0802277	0.269036	0.0466563	0.0587362	0	0.682635	0.426983	0.0638175	0.131322	0.134139	0.0792618	0.0308724	0.157447
FBgn0266984	lncRNA:CR45435	1.68919	0.0138808	Group Up	0.173466	0.0832237	0.143306	0	0	0.252885	0	0.170498	0.0939014	0.246285	0.321215	0.0302081	0.240683	0.239143	0.793157	0.117472	0.0827625	0.292558	0.540845	0.0638175	0	0.160967	0.237785	0	0.0524824
FBgn0267987	lncRNA:CR46254	1.68464	0.0147292	Group Up	1.03159	0.277412	0.334381	0.116195	0.0422502	0.733366	0	0.414068	0.313005	0.533618	0.458879	0.241664	0.855762	0.717428	1.11975	0.146841	0.2207	5.70488	6.49014	1.30826	0.875477	1.6365	1.38708	0.463085	0.367377
FBgn0030222	CG9806	1.68138	0.0361856	Group Up	0.100679	0.0554825	0.429919	0.0774632	0.0845004	0.303462	0	0.121785	0	0.32838	0.137664	0.0302081	0	0.0298928	0.0933126	0.0881043	0.0275875	0.195039	0.113862	0	0.0437739	0.0268278	0.198155	0.0308724	0
FBgn0051797	CG31797	1.66955	0.0317167	Group Up	0.161981	0.194189	0.0955375	0	0	0.556347	0.744224	0.146142	0.219103	0.0410475	0.0917758	0.0302081	0.187198	0.119571	0.139969	0.0881043	0	0.341318	0.540845	0.0638175	0.0875477	0.160967	0.0396309	0	0
FBgn0058005	CR40005	1.66715	0.0158671	Group Up	0.120869	0.277412	0.0955375	0	0	0.252885	0	0.146142	0.125202	0.32838	0.183552	0	0.0534851	0.179357	0.466563	0.0587362	0.11035	0.243798	0.0853965	0.0638175	0	0.0804835	0.118893	0.0308724	0
FBgn0031171	CG1801	1.66358	0.0284735	Group Up	0.192584	0.22193	0.525456	0	0.0845004	0.0758655	0.558168	0.219212	0.313005	0.287333	0.963646	0	0	0.119571	0.0933126	0.0293681	0.0275875	0.0975193	0.227724	0.191453	0.0437739	0.0536556	0.396309	0.0926171	0
FBgn0015550	tap	1.61755	0.00948095	Group Up	0.170722	0.388377	0.525456	0.116195	0.0845004	0.404616	0.651196	0.170498	0.062601	0.205238	0.275327	0.120832	0	0.0896785	0	0.146841	0.055175	0.0975193	0.0853965	0.0319088	0.0437739	0.321934	0.158524	0.0617447	0
FBgn0287612	lncRNA:CR46481	1.6063	1.9907e-06	Group Up	2.66363	3.967	3.72596	0.96829	0.591503	4.57722	4.93048	1.60756	0.719911	3.81742	3.34982	1.41978	2.27312	1.58432	1.11975	0.528626	1.02074	2.73054	3.15967	1.05299	1.0068	3.94369	12.8404	1.04966	1.94185
FBgn0033593	Listericin	1.59707	1.45915e-11	Group Up	140.236	195.909	153.481	67.9352	57.7138	317.573	376.81	58.5297	64.479	224.078	153.357	52.411	49.9283	127.642	274.572	36.6514	22.7321	289.681	254.766	64.6471	85.1839	107.472	133.952	87.8319	108.324
FBgn0033926	Arc1	1.5872	9.26274e-07	Group Up	334.993	224.704	341.499	86.5651	71.5296	484.047	582.03	131.381	155.939	988.095	683.363	291.417	364.127	289.153	1042.25	108.045	141.055	423.77	684.453	128.816	102.912	194.019	302.067	89.0668	129.527
FBgn0266993	lncRNA:CR45444	1.57993	0.00619114	Group Up	0.344667	0.554825	0.573225	0.154926	0	0.83452	1.86056	0.389711	0.062601	0.533618	0.412991	0.362497	0.240683	0.478285	0.233281	0.0881043	0.11035	0.438837	0.142328	0.0957263	0.131322	0.348762	0.0396309	0.185234	0
FBgn0033736	CG13154	1.55852	0.0455371	Group Up	0.270222	1.24836	0.143306	0.154926	0.126751	0.202308	0	0	0.062601	0.0410475	1.65196	0.0906242	0.0802277	0.0597857	0.279938	0.0881043	0.0827625	0.585116	0.25619	0.382905	0.350191	0.295106	0.198155	0	0.104965
FBgn0264084	lncRNA:CR43753	1.55722	0.0310145	Group Up	0.677432	0.416118	0.525456	0.23239	0.0845004	0.429904	0	0.584566	0.250404	5.21303	3.71692	0.543745	0.882504	0.597857	0.559875	0.146841	0.33105	0.487597	0.142328	0.0957263	0.262643	0.187795	0.317047	0.0926171	0.157447
FBgn0266317	asRNA:CR44982	1.54899	0.0424324	Group Up	0.245421	0.0554825	0.0477688	0.0387316	0	0.682789	1.72102	0.170498	0.281704	0.205238	0.0458879	0.120832	0.267426	0.0597857	0.0466563	0.0881043	0.055175	0.195039	0.25619	0.159544	0	0.670696	0.554833	0.0617447	0.104965
FBgn0035737	Cpr65Ec	1.54887	0.00481939	Group Up	0.519113	0.527083	0.620994	0.0387316	0.126751	0.379327	3.39552	0.267926	0.0313005	0.779903	1.10131	0.845826	0.427881	0.538071	0.653188	0.234945	0.137938	0.390077	0.370052	0.223361	0.218869	0.402417	0.475571	0.0617447	0.20993
FBgn0052793	CG32793	1.54709	0.0486228	Group Up	0.127952	0.277412	0	0.0387316	0.126751	0	0	0.0974277	0	0.082095	0.0917758	0.0302081	0.0534851	0.20925	0.326594	0.0881043	0.0827625	0.536356	0.483914	0.0638175	0	0.187795	0.158524	0.0308724	0.104965
FBgn0035167	Gr61a	1.54681	0.00108821	Group Up	1.76126	5.35406	5.15903	1.93658	1.77451	2.8576	7.20967	0.706351	2.28493	1.84714	1.56019	0.573953	0.481366	1.10603	1.30638	0.323049	0.413813	0.828914	1.53714	0.350996	0.131322	1.42187	2.21933	0.308724	0.577306
FBgn0267801	lncRNA:CR46126	1.54098	0.0279712	Group Up	0.109658	0.471601	0	0.0387316	0.0422502	0.354039	0	0.0243569	0.0313005	0.246285	0.0917758	0.0906242	0.0534851	0.179357	0.233281	0.0881043	0.0827625	0.146279	0.0853965	0.0638175	0	0.0268278	0.198155	0.0308724	0.0524824
FBgn0034935	Orcokinin	1.53473	4.36913e-09	Group Up	194.79	257.744	310.64	68.9422	78.9657	562.77	586.774	135.473	217.695	207.331	152.669	81.6524	105.392	186.382	370.684	75.3292	77.4933	285.195	238.456	41.1623	49.4207	180.954	245.474	66.1903	92.1591
FBgn0267304	lncRNA:CR45740	1.51843	0.0130456	Group Up	0.783167	4.54956	4.53803	0.387316	0.169001	0.83452	0.976794	0.511495	0.62601	0.16419	0.825982	0.543745	0.454623	0.149464	0.419907	0.0587362	0.055175	0.438837	0.654707	0.414814	0.306417	0.187795	0.673725	0.277851	0.577306
FBgn0033374	Boot	1.51023	0.049842	Group Up	0.787065	0.499342	0	0.309853	0.253501	0.303462	0	0.0974277	0.125202	0.738855	3.07449	0.302081	0	0.807107	2.00622	0.411153	0.4414	2.63302	3.3874	0.191453	1.26944	0.134139	0.792618	0.586575	0.524824
FBgn0266102	CR44839	1.48243	0.0478387	Group Up	0.0804233	0.249671	0.143306	0.0387316	0	0.126442	0	0.0487138	0.0939014	0.082095	0.0458879	0.0302081	0	0.269036	0.0933126	0.0881043	0.055175	0.195039	0.170793	0.0319088	0	0.0268278	0.0792618	0.0617447	0
FBgn0039198	CG5768	1.45681	0.0143558	Group Up	0.190329	0.665789	0.38215	0.154926	0.0845004	0.379327	0	0.0974277	0.156502	0.0410475	0.22944	0.0906242	0	0.119571	0.559875	0.0587362	0.0827625	0.487597	0.113862	0.191453	0.131322	0.24145	0.237785	0.0617447	0
FBgn0039202	CG13622	1.45129	0.0165177	Group Up	0.255391	0.166447	0.238844	0.154926	0	0.151731	1.48845	0.0487138	0.344305	0.246285	0.642431	0.15104	0.0534851	0.298928	0.279938	0.176209	0.137938	0.487597	0.0853965	0.191453	0	0.187795	0.356678	0.0308724	0.20993
FBgn0266263	asRNA:CR44958	1.44532	0.005747	Group Up	0.620968	1.05417	0.334381	0.309853	0.549253	0.531058	1.6745	0.0974277	0.156502	0.369428	0.963646	0.0302081	0.10697	0.62775	0.513219	0.146841	0.137938	0.926433	0.853965	0.223361	0.0875477	0.938974	2.41749	0.802681	1.04965
FBgn0030455	CG4318	1.44171	0.00569232	Group Up	0.330166	0.332895	0.0477688	0	0.126751	0.657501	0.372112	0.170498	0.0939014	0.574665	0.0917758	0.181248	0.534851	0.448393	0.559875	0.146841	0.165525	0.780154	1.05322	0.0638175	0.218869	0.295106	0.832249	0.123489	0.0524824
FBgn0028374	Hug	1.42027	7.95615e-11	Group Up	203.042	304.21	319.382	74.4034	72.6704	518.009	346.018	146.19	221.858	246.942	202.136	100.955	110.527	263.446	428.305	79.4407	81.4383	383.007	348.304	67.5189	82.4699	122.04	185.393	79.2185	89.1151
FBgn0260780	wisp	1.41953	9.77764e-11	Group Up	3.30425	4.66053	3.00943	3.13726	2.28151	6.1451	6.41893	1.55884	1.43982	7.92217	3.48748	1.14791	1.95221	3.58714	5.27216	1.73272	1.48973	6.53379	5.40845	1.4678	1.13812	2.17305	5.15202	0.926171	1.25958
FBgn0267776	asRNA:CR46107	1.41087	0.0141525	Group Up	0.84726	0.332895	0.620994	0.271121	0.126751	2.40241	2.04662	1.19349	0.813812	0.205238	0.275327	0.15104	0.267426	1.82346	1.58631	0.587362	0.358638	1.56031	3.61512	0.893445	0.262643	0.456073	0.317047	0.0617447	0.104965
FBgn0085243	CG34214	1.40705	0.00757169	Group Up	0.3329	0.943202	0.477688	0.309853	0.253501	0.252885	1.44193	0.0730708	0.0313005	0.65676	0.412991	0.15104	0.240683	0.149464	0.559875	0.117472	0.303463	0.0975193	0.113862	0.191453	0.0437739	0.670696	0.237785	0.154362	0.104965
FBgn0283442	vas	1.4065	0.020313	Group Up	0.768081	0.582566	0.7643	0.387316	0.126751	5.91751	3.02341	0.876849	0.219103	0.123143	0.22944	0.422913	0.10697	0.508178	0.746501	0.61673	0.358638	0.195039	1.08169	0.382905	0.306417	0.509729	0.237785	0.185234	0.524824
FBgn0037626	CG8236	1.40102	0.00124918	Group Up	0.692498	1.30384	0.716531	0.271121	0.169001	1.51731	3.95369	0.340997	0.939014	0.410475	0.458879	0.332289	0.160455	0.717428	0.699844	0.440522	0.275875	0.438837	0.711638	0.446723	0.0875477	0.670696	0.87188	0.370468	0.314894
FBgn0035607	CG4835	1.38569	0.0398158	Group Up	0.136846	0.277412	0.0477688	0.0774632	0	0.455193	0	0.0487138	0.125202	0.16419	0.137664	0.211456	0.160455	0.239143	0.326594	0.0881043	0.055175	0.0975193	0.341586	0.0319088	0	0.160967	0.237785	0	0
FBgn0035928	CG13310	1.37782	0.029595	Group Up	0.255164	0.138706	0.191075	0.193658	0.0845004	0.227596	1.02331	0.0487138	0.563409	0.533618	0.550655	0.120832	0.240683	0.269036	0.699844	0.0293681	0.055175	0.146279	0.56931	0.0319088	0.0437739	0.0804835	0.158524	0.123489	0
FBgn0032525	Hsp60D	1.37359	0.00359179	Group Up	0.343106	0.305153	0.334381	0.23239	0.169001	0.783943	1.62799	0.194855	0.313005	0.615713	0.0917758	0.181248	0.294168	0.478285	0.233281	0.0881043	0.0827625	0.0975193	0.56931	0.127635	0.131322	0.724351	0.277416	0.123489	0.157447
FBgn0034741	CG4269	1.37119	0.00334184	Group Up	7.96832	4.1057	7.54746	1.43307	1.43651	18.1318	8.41903	0.730708	1.65893	8.61998	6.69964	4.16871	4.89389	11.2696	31.7729	1.26283	3.36568	17.2122	22.5731	4.91395	6.17211	3.5681	3.13084	6.60668	11.5461
FBgn0039782	CG15539	1.37077	0.00288743	Group Up	2.57554	0.776754	1.19422	0.154926	0.338002	8.29463	9.39583	2.38698	3.03615	3.73532	5.13945	1.54061	1.47084	4.03553	4.0591	1.58588	1.84836	2.92558	3.87131	1.05299	0.919251	0.885318	1.82302	0.555702	0.787236
FBgn0031886	Nuf2	1.35893	0.000525372	Group Up	0.782184	1.99737	1.48083	0.426048	0.549253	1.71962	2.93038	0.584566	0.344305	0.861998	1.92729	0.332289	0.454623	0.328821	0.513219	0.176209	0.275875	0.438837	0.626241	0.350996	0.218869	0.563384	0.634095	0.617447	0.419859
FBgn0029810	CG12239	1.35597	4.66721e-12	Group Up	1388.9	2088.89	2102.73	579.386	658.216	3777.34	3343.75	1012.22	1366.42	2420.94	1656.74	608.511	607.965	1210.81	1702.77	565.865	560.606	1620.67	1606.31	399.944	588.408	1348.8	1941.99	692.992	871.365
FBgn0037627	CG13318	1.3492	0.0011545	Group Up	42.3301	30.9315	28.3269	17.7778	18.9703	11.1269	19.6289	10.4735	15.8067	183.031	200.438	31.4466	31.1551	26.4253	42.5039	12.0703	11.9178	49.3448	58.582	20.0387	31.0794	43.622	61.6261	26.2724	33.3263
FBgn0032069	LManVI	1.33832	0.00905756	Group Up	0.341145	0.582566	0.812069	0.309853	0.211251	0.632212	0.744224	0.0974277	0.313005	0.65676	0.412991	0.0604161	0.0267426	0.747321	0.513219	0.293681	0.11035	0.195039	0.512379	0.223361	0.350191	0.0268278	0.198155	0	0.157447
FBgn0265531	asRNA:CR44381	1.32882	0.0157122	Group Up	0.299526	0.138706	0.0477688	0.23239	0.211251	0.480481	1.86056	0.170498	0.156502	0.205238	0.321215	0.0906242	0.133713	0.4185	0.279938	0.146841	0.248288	0.828914	0.455448	0.191453	0.131322	0.214623	0.0792618	0.0926171	0.0524824
FBgn0033885	DJ-1alpha	1.32343	6.36198e-06	Group Up	5.70899	12.7055	13.3275	3.83443	3.54902	11.835	10.4191	2.75233	4.03776	9.72826	10.6001	4.44058	5.80313	3.82628	7.88491	1.61525	1.60008	7.41147	5.97776	1.34017	1.92605	3.21934	4.83497	1.51275	2.83405
FBgn0051832	CG31832	1.31777	0.00411825	Group Up	0.323746	0.471601	0.143306	0.116195	0.0845004	0.657501	0.325598	0.243569	0.125202	0.65676	0.0917758	0.15104	0.454623	0.4185	0.513219	0.176209	0.137938	0.877674	0.967827	0.0638175	0.0437739	0.187795	0.475571	0.123489	0.262412
FBgn0265104	lncRNA:CR44206	1.2956	7.61034e-05	Group Up	0.740215	1.77544	0.429919	0.426048	0.422502	1.59318	2.18616	0.584566	0.751211	1.06724	0.596543	0.362497	0.401138	0.777214	0.513219	0.205577	0.193113	1.17023	0.8255	0.25527	0.131322	0.938974	1.18893	0.339596	0.629789
FBgn0266965	lncRNA:CR45416	1.2805	0.000689308	Group Up	0.428583	0.749013	0.812069	0.154926	0.0845004	0.682789	1.6745	0.414068	0.281704	0.451523	0.275327	0.332289	0.240683	0.478285	0.886469	0.323049	0.137938	0.438837	0.426983	0.191453	0.175095	0.402417	0.317047	0.0926171	0.262412
FBgn0263143	vret	1.26636	1.5014e-07	Group Up	1.06027	0.859978	1.76744	0.697169	0.591503	1.59318	1.81405	0.340997	0.469507	1.6419	1.00953	0.755201	0.588336	1.73378	2.47278	0.46989	0.468988	1.75535	2.24877	0.670084	0.656608	0.885318	0.832249	0.493958	0.629789
FBgn0029924	CG4586	1.26629	2.52912e-05	Group Up	5.20966	2.74638	5.20679	1.43307	0.845004	7.2578	8.00041	3.14204	3.31785	5.74665	8.12216	2.05415	2.35334	9.20699	12.6439	4.93384	4.88299	11.4585	12.1548	2.74415	4.11474	3.46079	5.3898	1.82147	1.99433
FBgn0026085	dgt4	1.24129	0.00177013	Group Up	1.11344	0.471601	0.38215	0.154926	0.422502	1.56789	5.44214	0.63328	1.31462	1.92923	1.33075	0.543745	0.427881	1.28539	1.39969	0.46989	0.717275	1.70659	1.7364	0.76581	0.831703	1.23408	0.911511	0.308724	0.734754
FBgn0034505	CG16739	1.23313	0.000192696	Group Up	4.41256	12.6777	12.8976	3.40838	3.67577	10.1913	4.60489	4.04325	4.31947	4.43313	4.5429	2.38644	2.72774	3.22843	6.57854	1.17472	1.65525	7.07015	5.6931	2.01025	1.13812	2.4145	2.85343	0.864426	1.31206
FBgn0040342	CG3706	1.22817	0.000266824	Group Up	2.0655	2.6909	3.53489	0.658437	0.507003	5.91751	2.69781	2.46005	2.84834	4.84361	2.79916	0.93645	1.17667	2.42132	3.45257	0.881043	1.07591	1.90163	3.72898	0.989171	0.656608	0.804835	1.30782	0.493958	0.787236
FBgn0030938	CG15047	1.22714	0.00599796	Group Up	0.338757	0.471601	0.525456	0.271121	0.0845004	0.783943	0.325598	0.340997	0.187803	0.410475	0.137664	0.0302081	0	0.508178	0.559875	0.146841	0.0827625	0.780154	0.227724	0.287179	0.350191	0.590212	0.515202	0.0926171	0.419859
FBgn0058354	CR40354	1.22605	0.0116259	Group Up	0.517791	0.638048	0.668763	0.426048	0.633753	0.708078	0	0.389711	0.156502	0.861998	0.321215	0.0906242	0.0534851	0.388607	1.07309	0.146841	0.33105	1.46279	1.19555	0.25527	0.56906	0.402417	1.26819	0.123489	0.262412
FBgn0030949	Cyp308a1	1.21976	0.0183639	Group Up	2.11811	0.554825	1.48083	1.08448	0.464752	1.41616	0.651196	0.779421	1.06422	12.1911	11.0131	0.845826	1.01622	1.58432	2.28616	1.90893	0.965563	1.26775	1.28095	0.925354	0.963025	1.20725	2.02118	2.13019	1.73192
FBgn0267641	lncRNA:CR45979	1.21965	0.00580377	Group Up	0.58729	1.85866	0.620994	0.116195	0.0845004	1.18856	0.93028	0.706351	0.62601	1.02619	0.321215	0.543745	0.240683	0.926678	1.02644	0.146841	0.413813	0.828914	1.05322	0.350996	0.175095	0.321934	0.158524	0.0617447	0.367377
FBgn0265585	lncRNA:CR44412	1.21708	0.0409428	Group Up	0.188977	0.138706	0.38215	0.116195	0.0845004	0.32875	0	0.267926	0.219103	0.32838	0.321215	0.181248	0.160455	0.478285	0.233281	0.0587362	0	0.341318	0.142328	0.0957263	0.0437739	0.37559	0.237785	0	0
FBgn0031108	CG15459	1.20926	0.0241355	Group Up	0.566518	0.610307	2.14959	0.271121	0.718254	0.783943	0.93028	0.194855	0.500808	0.451523	0.917758	0.483329	0.695306	0.269036	1.02644	0.146841	0.11035	1.07271	1.22402	0.382905	0.131322	0.107311	0.356678	0.0617447	0
FBgn0000147	aurA	1.20924	2.04068e-05	Group Up	1.84275	1.16513	1.33753	1.23941	0.845004	4.55193	2.13964	1.5832	1.34592	1.47771	3.16627	1.38957	0.641821	3.58714	4.85225	0.939779	1.04833	3.5107	3.41586	0.861536	0.744156	1.28774	1.54561	0.710064	0.839718
FBgn0034907	CG5539	1.20647	0.0410506	Group Up	0.355897	0.804496	0.429919	0.23239	0.211251	0.657501	0.558168	0.340997	0.187803	0.32838	0.458879	0.724993	0.10697	0.508178	1.02644	0.117472	0.055175	0.487597	0.8255	0.127635	0.218869	0.0536556	0.0792618	0	0
FBgn0037879	scpr-C	1.2034	0.0149803	Group Up	1.3881	3.52314	7.21308	1.70419	1.56326	0.556347	3.39552	0.414068	1.06422	1.80609	0.688319	0.543745	0.615079	0.62775	1.44634	0.352417	0.468988	1.12147	1.87872	1.14872	0.656608	1.52919	0.237785	0.339596	0.419859
FBgn0051659	CG31659	1.19838	0.0418221	Group Up	0.378456	0.721272	0.620994	0.387316	0.169001	0.960963	2.23267	0.243569	0.125202	0.533618	0.183552	0.241664	0.10697	0.179357	0.139969	0	0.137938	0.195039	0.455448	0.287179	0.0875477	0.107311	0.237785	0.308724	0.419859
FBgn0030501	BthD	1.19334	0.000681285	Group Up	0.677592	0.749013	0.955375	0.387316	0.380252	0.859809	2.74433	0.243569	0.406906	0.944093	1.1472	0.392705	0.0802277	0.448393	0.699844	0.323049	0.4414	1.07271	1.13862	0.446723	0.306417	0.348762	0.634095	0.586575	0.524824
FBgn0283545	vilya	1.18626	0.0310921	Group Up	0.362962	0.970943	0.716531	0.0774632	0	0.986251	0.46514	0.389711	0.532108	0.82095	0.183552	0.0604161	0	0.149464	0.466563	0.205577	0.193113	0.243798	0.370052	0.127635	0.306417	0.134139	0.792618	0.308724	0.20993
FBgn0040837	CG8620	1.18193	0.0197208	Group Up	9.38556	5.8534	10.1747	2.01404	3.04202	3.56568	0.604682	1.36399	3.38045	11.8217	11.1049	6.22286	5.93685	7.74224	22.4417	2.52566	2.62081	34.9119	34.9556	12.0615	12.7382	7.69959	11.0174	3.58119	7.87236
FBgn0000357	Cp18	1.17688	0.000424017	Group Up	4.42578	7.37917	5.30233	1.82039	2.28151	11.0764	13.4425	4.2381	5.91579	7.63484	4.12991	2.20519	3.10214	5.20135	7.23172	1.9383	2.62081	4.68093	4.75374	1.69116	2.18869	2.57547	3.05158	0.339596	1.41702
FBgn0004360	Wnt2	1.16893	0.0083371	Group Up	5.94957	3.07928	2.86613	1.89785	0.633753	2.65529	0.93028	1.16913	0.62601	20.5238	27.5327	25.8279	28.6413	1.91314	4.38569	1.43904	1.21385	3.2669	3.44433	1.34017	2.45134	1.12677	1.98155	1.48187	2.36171
FBgn0039780	PH4alphaNE1	1.1644	1.60756e-05	Group Up	2.8093	3.91151	4.96795	1.588	1.60551	6.32212	7.67481	1.48577	3.13005	1.84714	2.93683	1.1177	1.68478	3.13875	6.06532	1.73272	2.09665	2.87682	4.29829	0.957263	1.44454	1.36822	3.05158	1.01879	1.10213
FBgn0038142	CheA87a	1.16314	7.98029e-05	Group Up	13.6287	7.10175	5.06349	9.21812	5.66153	7.33366	13.1635	7.18529	6.2914	41.5811	28.5882	8.48846	12.4888	23.0175	23.3281	10.0733	5.65544	21.308	20.2674	5.80739	7.04759	21.4086	22.55	7.00803	7.4525
FBgn0085734	CR40450	1.16032	0.0093039	Group Up	2.16296	4.99342	1.14645	0.154926	0.211251	5.03241	0.69771	2.41134	1.37722	5.7877	1.8814	2.11456	1.57781	3.10885	2.79938	0.675466	1.04833	6.19248	3.24507	1.14872	1.66341	0.751179	1.78339	0.586575	1.52199
FBgn0051415	CG31415	1.15618	0.0013019	Group Up	0.421346	0.693531	0.38215	0.309853	0.126751	0.632212	1.39542	0.292283	0.438207	0.697808	0.825982	0.392705	0.133713	0.388607	0.559875	0.176209	0.165525	0.731395	0.370052	0.223361	0.306417	0.214623	0.396309	0.154362	0.104965
FBgn0033354	FANCI	1.15003	1.12286e-05	Group Up	2.14201	2.33026	2.2929	1.00702	1.60551	3.81856	4.04672	0.925563	2.15973	2.33971	2.47795	0.906242	1.39061	3.55725	6.06532	1.61525	1.13109	3.36442	3.95671	1.11681	0.700382	1.09994	1.50597	1.04966	0.944683
FBgn0038207	CG14356	1.14573	0.036087	Group Up	2.22327	0.305153	0.429919	0.0387316	0.0845004	3.945	7.53527	1.09606	2.00323	0.903045	1.1472	1.02707	1.0697	3.49746	4.57232	1.46841	1.21385	4.63217	4.32676	2.23361	1.57586	3.51444	3.2101	1.48187	2.04681
FBgn0029644	CG14421	1.14223	0.0219536	Group Up	0.307825	0.499342	0.716531	0.464779	0.0845004	0.126442	0.558168	0.0243569	0.0313005	0.451523	0.321215	0.120832	0.0267426	0.747321	0.699844	0.146841	0.33105	0.341318	0.313121	0.223361	0.306417	0.24145	0.237785	0.216107	0.157447
FBgn0267549	asRNA:CR45889	1.1394	0.0350769	Group Up	0.21774	0.305153	0.143306	0.0774632	0	0.429904	0	0.0974277	0.062601	0.615713	0.504767	0.241664	0.160455	0.149464	0.466563	0.0587362	0.11035	0.390077	0.370052	0.0957263	0.0875477	0.187795	0.158524	0.0926171	0.419859
FBgn0039454	CG14247	1.10926	0.0199197	Group Up	0.206668	0.305153	0.0955375	0.154926	0.169001	0.581635	0.325598	0.146142	0.187803	0.205238	0.321215	0.0604161	0.320911	0.388607	0.326594	0.146841	0.11035	0.243798	0.284655	0.0638175	0.0437739	0.160967	0.317047	0	0
FBgn0267666	lncRNA:CR46004	1.10679	0.00354913	Group Up	3.95865	9.82039	4.25142	0.658437	0.929505	9.86251	6.04682	4.06761	3.53695	10.7134	4.22169	4.80308	4.09161	3.94585	4.89891	1.26283	1.40696	5.3148	3.87131	1.40399	0.656608	2.92423	2.02118	1.35838	2.93901
FBgn0037581	CG7352	1.09418	1.03425e-05	Group Up	3.41662	4.49408	5.78002	1.43307	1.22526	7.33366	9.6284	2.75233	4.31947	4.51523	3.25804	1.81248	1.71152	2.36153	2.70606	1.49777	1.46214	4.38837	4.21289	1.30826	1.92605	3.78272	5.54833	1.75972	2.78157
FBgn0031837	DIP-iota	1.09314	0.00755659	Group Up	0.641071	0.527083	0.143306	0.154926	0.0845004	0.404616	1.44193	0.438425	0.313005	1.02619	0.917758	0.724993	0.615079	0.836999	2.19285	0.411153	0.413813	1.41403	0.853965	0.319088	0.350191	0.456073	0.752987	0.277851	0.314894
FBgn0266705	asRNA:CR45195	1.08783	0.00121282	Group Up	3.70928	3.60636	4.25142	0.813364	0.929505	8.11761	5.76774	2.63055	4.41337	6.40341	5.27711	2.68852	3.53002	4.36435	7.74494	1.20409	1.7656	7.65527	6.80326	1.75498	3.41436	1.58284	1.42671	0.987915	1.88937
FBgn0261700	lncRNA:CR42736	1.08617	0.0320534	Group Up	0.501555	0.471601	0.525456	0.154926	0.169001	1.01154	2.18616	0.511495	0.719911	0.451523	0.275327	0.513537	0.0802277	0.986464	0.653188	0.528626	0.358638	0.877674	0.455448	0.159544	0.131322	0.429245	0.198155	0.0308724	0.157447
FBgn0037844	CG4570	1.07804	0.00402793	Group Up	0.811903	0.859978	0.812069	0.503511	0.507003	2.88289	0.651196	0.462781	0.0939014	1.84714	1.10131	0.664577	0.748792	0.478285	0.606532	0.352417	0.4414	1.21899	1.53714	0.223361	0.262643	0.429245	1.42671	0.586575	0.787236
FBgn0266220	lncRNA:CR44915	1.07775	0.0438187	Group Up	0.241547	0.665789	0.286613	0.154926	0.253501	0.303462	0.744224	0.170498	0.0313005	0.369428	0	0.0604161	0.0534851	0.448393	0.37325	0.205577	0.193113	0.0975193	0.426983	0.127635	0.306417	0.0804835	0.277416	0.0617447	0.104965
FBgn0034692	CG13502	1.07667	3.15768e-05	Group Up	3.23988	1.63673	2.72282	1.08448	1.18301	6.6003	4.18626	2.14341	2.41014	6.85493	2.93683	1.66144	2.80797	3.13875	5.41213	1.70335	1.35179	9.21557	5.46538	2.32934	2.10115	2.81692	4.00272	1.94496	2.04681
FBgn0011581	Ms	1.07613	1.63533e-10	Group Up	304.584	367.266	505.011	174.525	179.225	605.862	634.404	218.676	301.392	324.316	316.627	174.663	218.299	350.553	581.804	150.981	171.87	394.953	476.57	120.934	143.009	245.501	354.181	128.182	171.198
FBgn0035670	CG10472	1.07456	3.27379e-05	Group Up	3.89929	4.54956	4.82464	1.39434	0.971755	6.32212	10.1401	2.26519	4.16296	6.23922	6.37842	2.77914	3.85093	3.19853	3.87247	1.35093	1.65525	7.70403	6.12008	2.1698	2.71398	2.6023	4.12161	1.72885	2.46667
FBgn0025739	pon	1.07029	7.39418e-05	Group Up	1.19434	1.19287	0.620994	1.08448	0.633753	3.03462	2.51176	0.755065	0.344305	1.55981	1.83552	0.543745	0.588336	1.37507	1.58631	0.646098	0.468988	1.46279	2.10645	0.446723	1.18189	1.07311	1.74376	0.555702	1.31206
FBgn0014465	Cp7Fb	1.06665	0.0292244	Group Up	1.93897	4.13344	2.96166	1.78165	1.73226	4.24847	7.39573	1.16913	1.69023	3.03752	3.71692	1.63123	2.11266	0.538071	0.979782	0.499258	0.2207	0.731395	0.8255	0.414814	0.175095	1.58284	2.77416	1.08053	1.10213
FBgn0265693	lncRNA:CR44500	1.06442	0.000169781	Group Up	0.914125	2.08059	1.5286	0.7359	0.507003	1.13798	1.81405	0.63328	0.62601	0.779903	1.37664	0.483329	0.882504	1.46475	1.30638	0.323049	0.8828	1.31651	0.939362	0.191453	0.131322	0.885318	0.87188	0.463085	0.577306
FBgn0030242	sofe	1.0643	2.36663e-07	Group Up	2.0493	3.13476	3.72596	1.78165	1.60551	3.41395	3.58158	1.63191	0.907714	2.95542	1.78963	0.966658	0.374396	3.04907	2.93935	0.763571	1.40696	2.24294	2.64729	1.40399	1.79473	1.9316	3.13084	1.1114	0.892201
FBgn0032336	AstC	1.06312	1.25288e-07	Group Up	143.551	200.902	188.304	63.055	60.6713	340.737	222.104	143.608	171.934	193.662	191.72	81.1388	97.6906	208.263	237.014	74.8006	78.8175	188.31	229.517	68.189	53.4479	115.816	106.686	60.9729	67.8597
FBgn0033090	CG15909	1.06308	0.0482591	Group Up	0.274362	0.138706	0.334381	0.348584	0.295752	0.50577	0	0.31664	0	0.410475	0.321215	0.0604161	0.21394	0.269036	0.606532	0.117472	0.0827625	0.390077	0.284655	0.127635	0.175095	0.37559	0.990773	0.0617447	0.157447
FBgn0039675	ppk21	1.05961	0.0182305	Group Up	0.434717	0.360636	0.38215	0.0774632	0.169001	0.783943	0.790738	0.511495	0.688611	0.533618	0.734207	0.332289	0	0.478285	0.37325	0.205577	0.2207	0.828914	1.11015	0.51054	0.175095	0.563384	0.396309	0.154362	0.0524824
FBgn0267656	lncRNA:CR45994	1.05788	0.0140628	Group Up	4.85956	4.85471	5.54118	0.7359	0.507003	13.4535	5.67471	3.82404	5.07068	9.19464	8.94814	4.71246	8.90527	4.30457	8.35148	1.87956	1.07591	9.84945	6.604	1.97834	1.70718	3.83638	1.82302	1.17315	2.62412
FBgn0039622	eIF4E6	1.0575	0.000203769	Group Up	1.359	2.358	1.28976	0.813364	0.887255	2.2001	4.41883	1.29092	1.75283	1.97028	1.5143	0.755201	0.401138	1.64411	2.19285	0.763571	0.855213	1.07271	1.82179	0.574358	0.437739	0.965802	1.50597	0.710064	0.419859
FBgn0010258	Rbp4	1.05392	0.00123409	Group Up	0.428403	0.499342	0.286613	0.348584	0.338002	0.809232	0.418626	0.219212	0.406906	0.32838	0.412991	0.302081	0.267426	0.538071	1.11975	0.146841	0.2207	0.731395	0.398517	0.319088	0.0875477	0.885318	0.792618	0.246979	0.157447
FBgn0266936	lncRNA:CR45387	1.05016	0.0448482	Group Up	0.563022	0.138706	0.0955375	0	0	0.83452	1.34891	0.438425	0.219103	0.369428	0.550655	0.302081	0.240683	0.866892	0.699844	0.440522	0.413813	0.975193	1.13862	0.76581	0.437739	1.04629	1.38708	0.277851	0.524824
FBgn0039354	Lgr3	1.04383	2.93522e-16	Group Up	6.3942	10.93	7.06978	3.13726	3.84477	10.8488	9.72143	5.48031	4.88287	8.00426	7.25029	3.32289	2.40683	10.044	9.33126	4.22901	4.35883	10.142	8.11267	4.27577	3.32681	6.70696	9.31326	2.46979	4.25107
FBgn0037746	CG8478	1.04	0.00651434	Group Up	1.08031	1.80318	0.668763	0.890827	0.633753	2.30125	0	0.584566	0.939014	1.47771	1.83552	0.845826	0.748792	1.40496	2.93935	0.528626	0.910388	1.51155	2.07798	0.414814	0.481512	0.697523	1.50597	0.463085	0.262412
FBgn0026874	CG13358	1.03731	0.0485072	Group Up	0.355673	0.305153	0.143306	0.154926	0.211251	0.733366	1.95359	0.292283	0.313005	0.16419	0.22944	0.0302081	0.294168	0.538071	0.0933126	0.0587362	0.275875	0.438837	0.483914	0.287179	0.262643	0.429245	0.43594	0.0926171	0.314894
FBgn0021742	C901	1.03074	8.5e-05	Group Up	6.70181	1.38706	1.28976	0.23239	0.507003	56.0646	37.1182	26.7683	22.9119	1.6419	0.963646	0.543745	0.427881	1.88325	1.30638	0.381785	0.6621	1.65783	1.45174	0.638175	0.262643	0.563384	1.18893	0.308724	0.682271
FBgn0263379	lncRNA:CR43431	1.02596	0.000675965	Group Up	0.744411	1.02643	0.716531	0.309853	0.422502	1.13798	1.6745	0.706351	0.594709	0.287333	1.46841	0.211456	0.588336	0.717428	0.606532	0.381785	0.33105	0.828914	1.7364	0.51054	0.350191	0.831663	1.42671	0.370468	0.629789
FBgn0267808	asRNA:CR46133	1.02115	0.0190465	Group Up	0.58916	1.24836	0.716531	0.154926	0.126751	0.783943	2.23267	0.487138	0.563409	0.65676	1.74374	0.573953	0.160455	0.478285	0.279938	0.234945	0.33105	0.487597	0.683172	0.287179	0.393965	0.268278	0.277416	0.339596	0.629789
FBgn0030459	CG12723	1.01784	0.0317819	Group Up	0.375521	0.749013	0.716531	0.154926	0.169001	0.404616	1.48845	0.462781	0.062601	0.49257	0.0458879	0.332289	0.320911	0.567964	0.279938	0.205577	0.11035	0.390077	0.597776	0.127635	0.262643	0.24145	0.317047	0.0926171	0.419859
FBgn0284444	ddbt	1.01697	0.00128767	Group Up	0.576597	0.499342	1.09868	0.116195	0.169001	0.480481	4.37232	0.292283	0.250404	0.738855	0.504767	0.302081	0.294168	0.478285	0.606532	0.264313	0.2207	0.585116	0.711638	0.478631	0.350191	0.509729	0.317047	0.0926171	0.104965
FBgn0050295	Ipk1	1.01585	0.00257656	Group Up	15.7337	10.1533	8.83722	6.19706	6.21078	12.796	5.25608	7.59936	9.98485	14.2845	10.6919	7.4916	8.87853	19.4004	50.6221	9.83832	11.2557	33.3516	49.3877	9.15781	10.462	18.1356	29.9213	12.8429	14.8525
FBgn0040906	CG15579	1.01527	0.000282641	Group Up	1.71535	1.91414	1.95852	0.503511	0.676004	3.46452	4.04672	2.31391	1.50242	2.95542	1.56019	0.573953	1.0697	1.94303	2.89269	0.881043	0.77245	3.07186	1.76486	1.11681	0.525286	1.52919	1.58524	0.710064	1.83688
FBgn0266095	lncRNA:CR44832	1.01508	6.24838e-06	Group Up	53.054	38.1164	104.661	31.024	29.7019	62.2097	144.612	46.9845	56.0279	46.3426	76.3575	32.6549	39.472	57.8127	87.7605	26.3138	25.4357	78.2592	77.1131	22.6233	16.7216	54.0312	57.1478	31.3663	30.5448
FBgn0086695	hd	1.01039	3.58173e-07	Group Up	4.7778	5.21535	7.97738	2.40136	1.69001	7.08078	12.7448	3.55611	2.84834	5.25408	4.86412	2.56768	1.71152	5.79921	8.35148	3.75912	2.89669	6.24124	7.11638	3.44615	3.89587	3.51444	5.54833	2.40804	3.77873
FBgn0032284	CG7294	1.01009	0.0187756	Group Up	1.91778	0.610307	0.7643	0.619706	0.338002	1.36558	1.39542	0.535852	1.34592	2.05238	1.69785	1.20832	0.641821	3.13875	5.972	0.704835	0.634513	5.5586	2.70422	2.52079	1.70718	3.27299	3.329	1.91409	1.99433
FBgn0034249	RhoGAP54D	1.00984	0.00151524	Group Up	2.24606	4.54956	2.48398	1.78165	1.43651	5.79106	0.186056	1.38834	1.65893	2.99647	2.38617	1.20832	1.41736	1.43486	3.3126	1.14536	0.689688	4.19333	4.92453	1.62735	1.96982	2.4145	2.89306	1.01879	0.997166
FBgn0262524	ver	1.00417	3.13628e-06	Group Up	3.40413	2.46897	3.48712	1.85912	1.64776	5.20943	9.02372	1.99727	2.69184	2.91437	4.1758	1.90311	1.92546	3.3181	6.20529	1.9383	2.06906	5.46108	6.88865	2.29743	1.92605	2.44133	5.23128	2.62415	1.99433
FBgn0040333	brv3	1.00334	4.12534e-05	Group Up	5.13184	8.10044	7.59523	4.06682	2.70401	9.40732	15.8613	6.1623	4.97678	4.39208	4.49702	1.93332	2.29986	4.03553	5.5521	2.40818	1.93113	6.48503	6.83172	3.19088	3.19549	4.58756	8.08471	2.3463	2.51916
FBgn0287592	CG46462	-1.00224	0.0008746	Isolated Up	2.52152	1.8864	1.14645	5.57735	4.94328	1.18856	0.511654	4.7496	1.53372	1.88819	1.74374	2.35623	0.935989	2.63057	1.53966	3.25986	2.75875	1.65783	2.07798	3.22278	4.15852	1.98526	3.44789	1.85234	3.46384
FBgn0284084	wg	-1.00277	0.00503341	Isolated Up	2.13329	1.60899	1.14645	2.82741	3.04202	0.252885	0.372112	1.60756	1.34592	0.944093	1.83552	1.5104	1.89872	2.9295	1.8196	5.11005	3.77949	1.56031	1.33788	2.23361	2.40756	2.19988	2.37785	3.27247	3.77873
FBgn0053178	CG33178	-1.00402	0.000125426	Isolated Up	17.247	6.07533	11.4167	26.9572	25.6036	6.77732	16.3264	6.6738	7.73122	14.8181	14.2711	18.2457	20.1104	11.15	17.916	24.0231	20.2492	10.5321	16.0545	25.7504	25.3013	10.3824	14.0293	32.1999	31.332
FBgn0063496	GstE4	-1.00442	0.0251119	Isolated Up	1.98008	1.2761	1.86298	4.57033	2.53501	1.99779	0.651196	0.608923	5.69669	1.84714	0.550655	0.453121	1.92546	1.49464	0.839813	2.26134	2.56564	0.633876	0.910896	0.670084	1.48831	0.912146	4.28014	4.97045	2.51916
FBgn0010497	dmGlut	-1.00637	1.56259e-05	Isolated Up	3.8808	3.74507	1.81521	10.7287	4.94328	1.89664	3.16295	3.65354	2.19103	4.72046	2.70739	5.79995	4.76017	2.72025	2.47278	5.31563	4.38641	3.70573	1.93565	3.95669	5.29664	1.74381	3.17047	4.32213	3.98866
FBgn0013672	mt:ATPase6	-1.00719	0.0191184	Isolated Up	567.419	89.188	587.317	979.212	955.827	67.849	678.872	642.609	151.964	40.637	356.824	710.131	623.636	430.188	394.012	710.385	668.362	431.62	442.61	878.735	419.047	840.918	502.242	1244	771.859
FBgn0032889	CG9331	-1.00753	2.13356e-05	Isolated Up	79.576	61.8629	67.4017	88.889	110.738	37.25	43.7697	40.6517	62.601	60.1756	91.3628	98.1762	75.0129	48.1275	81.2753	144.344	121.661	64.1677	77.4831	122.147	153.427	24.5206	32.8144	110.122	91.8442
FBgn0037819	Phyhd1	-1.00973	9.66304e-06	Isolated Up	52.103	72.3769	52.0202	64.643	68.4031	24.1252	20.6522	44.8898	53.1482	17.8967	60.572	46.1579	48.3505	26.2758	34.1057	70.7478	62.9271	40.1292	42.8691	68.8591	92.6693	24.2792	35.866	82.6762	95.8329
FBgn0038858	CG5793	-1.01005	3.56821e-09	Isolated Up	45.2395	26.7425	29.6644	44.154	40.7292	27.1093	39.7695	45.6936	53.1482	21.3037	33.8194	52.6526	44.6868	35.9312	50.4821	81.8195	81.9901	33.8392	39.2255	56.319	61.7211	24.8962	28.3757	80.9782	50.698
FBgn0036547	CG17032	-1.01147	6.02918e-06	Isolated Up	24.9538	13.5377	15.5248	30.0945	30.8427	15.0972	7.72132	17.7806	14.1791	19.867	20.5578	24.4383	22.1963	22.4794	25.2877	47.0183	36.1948	19.6989	25.2489	35.8335	47.5822	13.6285	17.3583	42.82	33.9036
FBgn0028482	bdl	-1.01217	3.29303e-10	Isolated Up	297.63	214.218	187.875	315.779	282.696	123.104	208.894	280.957	338.421	260.775	238.847	334.131	261.836	204.646	175.008	401.55	398.143	245.651	159.72	498.511	568.491	258.03	284.074	426.841	474.913
FBgn0033817	GstE14	-1.01356	0.00390932	Isolated Up	17.5341	10.7636	9.31491	13.1687	11.2808	10.0395	19.2568	36.8764	42.6939	12.8068	28.9094	37.2767	28.0797	6.57642	4.10575	8.31117	8.13831	8.77674	5.92083	18.2518	16.1088	18.0283	15.892	25.9945	24.2469
FBgn0038983	CG5326	-1.01565	1.35154e-09	Isolated Up	27.0331	17.6157	14.9994	30.017	25.8571	13.3776	13.3495	30.9333	26.4802	21.4268	18.4011	24.6196	22.3033	22.9876	23.3748	42.9655	39.0639	15.8956	22.1462	47.4164	38.2584	21.1672	28.0191	47.7595	40.359
FBgn0085488	CG34459	-1.01606	0.0287744	Isolated Up	0.738168	0.388377	0.191075	0.852095	0.802754	0.0252885	0	0.340997	0.65731	0.65676	1.28486	1.29895	1.41736	0.687535	0.606532	1.20409	1.02074	0.780154	0.853965	0.701993	0.656608	0.402417	0.515202	1.1114	1.25958
FBgn0030347	CG15739	-1.01635	0.000205987	Isolated Up	17.9452	6.51919	6.44878	17.2743	17.2803	10.3936	18.0009	15.0526	16.4954	16.0085	9.08581	20.8134	13.6922	14.7372	17.4028	33.5971	33.8499	19.8939	16.4815	42.5663	39.5278	11.1067	7.92618	15.9301	10.6014
FBgn0036715	Cad74A	-1.01712	0.0315762	Isolated Up	4.23636	5.13213	4.39473	13.4786	15.6748	1.66904	0	2.50876	2.97355	3.73532	4.49702	3.62497	2.91494	2.27186	1.53966	3.3186	2.92428	3.2669	2.61883	6.50939	3.63323	3.27299	4.12161	4.59998	2.9915
FBgn0032213	CG5390	-1.01768	5.94494e-06	Isolated Up	90.9884	38.1997	60.5708	109.61	111.879	37.4775	68.6082	58.481	77.5626	78.1544	95.3551	82.1357	63.2461	60.2042	86.5941	158.118	138.158	77.5279	80.3581	110.628	155.222	42.9245	57.5441	186.901	148.263
FBgn0035734	CG14823	-1.01776	8.5e-05	Isolated Up	47.4161	33.0953	31.1452	53.0623	58.4743	19.4216	18.0009	32.7113	45.8865	22.6172	38.1787	62.0473	59.2615	41.1325	53.0482	89.5727	88.5283	56.2686	60.8308	71.2523	77.2609	17.8137	17.0413	54.8602	36.4753
FBgn0034494	CG10444	-1.01792	0.000102573	Isolated Up	43.4145	32.4018	28.8046	56.8967	54.6295	14.8696	19.9545	45.5718	38.124	22.1657	21.705	31.9299	22.6777	33.8088	28.0404	64.9623	58.8166	26.574	33.5608	53.5429	52.5724	56.8482	53.7791	110.832	78.8811
FBgn0037230	Nepl11	-1.02086	0.0157643	Isolated Up	130.803	72.4878	58.1823	179.095	182.352	34.5441	31.676	111.676	119.881	169.28	380.227	131.768	74.6385	50.8477	115.241	281.699	269.116	71.2866	81.696	199.206	245.44	24.2792	29.4854	138.246	86.9109
FBgn0063495	GstE5	-1.02223	0.016463	Isolated Up	4.66586	2.19156	3.96481	9.14066	7.90079	0.809232	2.69781	0.438425	0.62601	2.01133	2.79916	5.01454	4.78692	3.49746	5.59875	9.54463	6.8417	4.58341	5.00993	4.40341	6.08457	3.46079	3.52715	8.86037	8.18726
FBgn0039099	GILT2	-1.02225	0.000701298	Isolated Up	13.4406	9.59846	13.0409	20.8376	21.3786	5.43703	10.4191	5.65081	7.41821	7.47065	8.12216	11.5093	7.03329	6.09814	12.2239	14.5666	13.5179	13.0188	8.9097	14.7099	19.0854	10.1946	11.3741	42.8817	28.0781
FBgn0030612	Dbct	-1.02297	5.32618e-11	Isolated Up	9.51862	7.85077	6.63986	13.8659	13.3511	6.44857	5.39562	7.4045	9.04584	7.59379	9.45291	9.90824	9.33315	6.18782	6.48522	14.9777	14.2627	6.0462	8.59658	12.7635	11.7314	5.55336	5.86537	18.7704	10.9163
FBgn0038959	CG13856	-1.02412	0.000283411	Isolated Up	11.7228	9.43202	9.31491	12.3166	10.6471	4.45077	2.27919	10.1812	7.35561	6.93703	9.68235	23.0185	21.9824	9.74506	6.90513	11.4536	13.2972	6.48503	5.97776	21.9532	18.0348	16.4991	12.7612	13.2134	17.4242
FBgn0033807	AQP	-1.02541	5.62211e-11	Isolated Up	20.1207	15.5628	15.0949	27.1896	25.5614	12.3408	18.187	30.6897	26.981	14.6129	15.8772	26.3112	24.4694	12.4653	10.1711	15.8	17.4629	19.6014	10.76	34.7805	41.8916	13.4139	14.069	17.8751	21.7277
FBgn0038632	CG14301	-1.02556	0.00940578	Isolated Up	5.38838	5.43728	5.25456	5.46116	4.39402	1.34029	0.046514	5.13931	3.38045	2.25761	4.72646	6.64577	5.48222	3.64693	3.3126	7.87065	6.64859	5.70488	2.24877	12.4125	7.61665	6.11674	5.98427	8.79862	9.39435
FBgn0033742	Nepl10	-1.02586	0.0223385	Isolated Up	4.21475	2.94057	1.76744	4.88018	4.47852	0.177019	0.23257	1.77806	3.19265	4.18685	2.89094	3.86663	2.35334	4.06543	3.7325	12.3052	10.8143	3.46194	3.78591	4.69059	5.07777	3.91686	4.95386	5.98924	5.61562
FBgn0034538	CG16799	-1.02654	0.000175419	Isolated Up	8.50355	4.46634	5.63671	12.9364	11.6188	5.53818	1.11634	5.30981	7.23041	9.39988	10.233	11.2374	17.035	6.99492	9.33126	11.013	11.8626	4.48589	6.40474	6.66893	10.3306	5.0168	4.83497	14.0469	11.3362
FBgn0031877	Hmgcl	-1.0268	4.435e-05	Isolated Up	4.55395	2.38575	4.10811	6.19706	5.87278	1.44144	2.3257	2.19212	3.72476	2.58599	3.48748	5.07495	3.53002	3.46757	4.89891	7.98812	7.2831	4.29085	4.63988	5.4564	9.01741	2.76327	2.65527	8.39728	5.51065
FBgn0283531	Duox	-1.02759	0.00217572	Isolated Up	7.48549	7.2682	3.96481	13.0525	11.0273	1.56789	3.81415	5.35852	1.94063	5.58246	11.2425	10.3009	6.60541	3.49746	2.93935	7.78255	8.74524	5.99744	6.14855	22.049	14.3578	4.90949	7.0543	6.73017	7.71491
FBgn0038654	CG14298	-1.02787	9.13765e-06	Isolated Up	20.0274	11.5403	11.2257	26.0664	20.7449	6.47385	9.67491	18.0972	19.8132	8.9894	20.7413	28.0029	31.5562	11.0603	14.5101	15.8294	17.0767	15.9932	15.6276	36.1526	32.2613	22.5622	22.55	32.1999	31.9093
FBgn0267429	lovit	-1.02862	2.40877e-06	Isolated Up	71.9347	42.0002	52.0679	124.909	117.244	22.6838	59.5844	95.7714	82.0699	45.1112	63.0041	68.4515	40.2475	67.498	48.5692	127.81	113.55	40.2755	30.8281	98.981	67.7182	79.8933	59.3275	98.8533	79.9832
FBgn0013675	mt:CoII	-1.02864	0.00841381	Isolated Up	1322.89	104.806	1613.68	2347.79	2144.62	129.123	1946.1	1968.62	1197.24	224.735	986.085	1790.1	1787.39	957.378	924.168	1754.36	1671.83	1059.74	1158.63	1730.28	1048.34	1318.35	791.508	1988.67	1105.8
FBgn0013272	Gp150	-1.02891	4.47548e-09	Isolated Up	315.753	185.7	168.719	462.339	413.968	167.005	169.497	206.717	222.452	230.276	245.454	356.757	329.174	236.572	243.779	490.007	431.193	274.322	271.646	438.65	457.13	251.457	265.052	591.422	468.773
FBgn0010435	emp	-1.03096	1.54357e-05	Isolated Up	145.304	64.9977	54.4564	186.686	164.438	73.7412	75.4922	100.813	86.984	124.908	127.844	133.943	129.22	124.862	131.104	338.79	271.24	131.31	157.187	194.197	208.495	76.0837	104.546	244.571	181.379
FBgn0002719	Men	-1.03379	1.37205e-10	Isolated Up	295.627	244.234	235.357	449.751	428.29	219.656	200.661	314.204	392.07	161.604	173.869	249.307	194.525	197.382	215.645	355.119	326.443	177.436	202.589	299.783	429.203	214.676	288.909	658.816	465.519
FBgn0030588	CG9521	-1.03443	0.00190608	Isolated Up	6.25178	2.63542	2.72282	10.2251	7.81629	1.92193	1.11634	2.87412	1.81543	5.50037	6.65375	6.22286	7.19375	5.20135	4.71229	10.132	7.22793	6.97263	5.72157	12.8273	13.4386	4.77535	5.3898	9.23083	7.71491
FBgn0027843	CAH2	-1.0364	1.86644e-08	Isolated Up	95.6578	79.8947	67.9749	118.131	112.639	30.9784	42.0021	80.2561	78.9711	73.3108	69.9332	144.848	126.439	64.2696	56.6874	124.345	100.446	88.8401	82.6923	169.244	167.216	79.7859	81.1245	145.44	110.318
FBgn0035770	pst	-1.03684	0.000442854	Isolated Up	144.827	123.698	132.797	272.864	231.742	74.424	64.4684	71.0735	67.922	77.6208	103.707	80.142	56.9349	94.8799	127.465	265.576	233.887	95.6664	118.388	146.365	182.318	96.3655	131.812	373.031	252.703
FBgn0023441	fus	-1.03749	6.32957e-05	Isolated Up	42.897	36.5075	26.0817	67.7803	61.5163	17.4238	8.88417	31.4204	23.1624	36.0808	40.1519	45.1913	40.515	36.8878	36.8118	91.8928	83.2315	36.9111	47.1673	53.7024	56.0305	18.6453	26.0375	60.942	46.5519
FBgn0036117	CG6321	-1.0382	0.0214431	Isolated Up	5.44089	14.4809	18.4387	16.8482	19.2661	1.315	2.51176	2.77669	2.19103	1.55981	2.79916	4.56142	4.01138	2.21207	2.5661	4.64016	3.61396	3.16938	2.67576	4.14814	3.37059	2.33402	2.29859	4.38387	4.40852
FBgn0040074	retinin	-1.03892	0.00310061	Isolated Up	508.135	362.189	404.41	810.42	535.226	340.257	460.303	193.297	238.823	382.357	364.258	1139.78	959.844	149.315	139.222	320.406	265.475	650.503	140.449	1323.51	883.838	490.815	467.803	625.875	546.867
FBgn0039332	alrm	-1.04118	0.00020567	Isolated Up	34.4282	25.6052	25.1264	64.0233	52.2635	6.90376	29.5829	30.7871	26.1046	17.4041	22.6227	28.5768	22.0626	15.1557	15.0233	32.2462	35.8638	36.716	28.8071	60.8819	39.9218	39.6784	29.0495	80.3607	61.5094
FBgn0286783	Etf-QO	-1.04158	2.41884e-08	Isolated Up	54.3855	38.2829	39.8869	73.164	69.8819	27.1851	29.3503	32.7357	43.2886	36.7375	43.8688	63.1953	50.5167	41.5211	53.748	94.4772	87.6731	41.1044	51.9495	70.1993	82.076	26.1035	35.2715	103.392	69.6442
FBgn0034290	CG5773	-1.04221	0.000670099	Isolated Up	79.9188	38.7268	50.2527	122.431	130.511	27.1851	36.56	27.4502	46.5438	67.9336	51.6698	59.6005	57.8174	56.4975	98.0249	123.405	97.9356	70.9941	114.431	109.16	183.062	32.9714	35.6678	133.739	145.481
FBgn0033696	Cyp6g2	-1.04276	0.00247832	Isolated Up	15.4469	8.93267	8.59838	29.3198	29.4062	4.22318	6.23288	8.9877	10.7987	14.654	18.814	9.30408	6.33799	7.95149	14.0902	44.9332	38.7053	10.7759	18.8726	10.7533	15.4959	7.69959	10.74	18.9865	16.1121
FBgn0035476	CG12766	-1.04288	0.0268615	Isolated Up	1.15554	0.554825	1.00314	1.66546	2.32376	0.354039	1.44193	0.170498	0.156502	1.6419	1.97318	1.75207	1.60455	0.508178	0.559875	1.64461	1.13109	0.292558	0.483914	0.957263	1.8385	0.402417	0.752987	2.84026	1.67944
FBgn0039118	CG10208	-1.04312	5.07356e-06	Isolated Up	11.6596	9.34879	11.99	15.3377	17.3226	3.23693	7.02361	6.96608	7.54342	6.69074	10.0036	10.8447	11.4191	7.47321	9.23795	17.3272	16.249	8.43542	10.1053	17.486	20.7488	6.27771	9.66994	23.9261	15.1674
FBgn0029950	rumpel	-1.04322	1.99192e-07	Isolated Up	23.444	18.9195	19.1075	36.1366	33.1242	7.76357	8.83766	27.3285	26.8558	18.9229	19.8695	24.5591	26.074	12.7642	9.00466	26.5781	24.5805	31.645	17.734	42.9492	32.0862	17.8137	16.6054	30.5945	32.8015
FBgn0034165	CG6435	-1.04448	9.57364e-05	Isolated Up	13.3464	6.38048	6.40101	12.123	12.2103	8.92684	6.41893	10.8632	12.6767	4.30999	10.5083	8.45826	7.64837	8.25042	11.8974	28.4283	22.5114	15.1643	16.3677	23.5806	21.7556	8.31663	10.5022	26.8281	19.7859
FBgn0033033	scaf	-1.0448	6.52265e-10	Isolated Up	62.3856	39.8641	37.4029	103.297	96.4573	34.0889	31.583	71.3658	51.6458	45.9732	40.4731	60.7484	52.2282	61.938	40.8243	91.4817	79.7279	53.6356	53.202	120.902	118.014	47.995	41.4936	65.2333	57.6782
FBgn0036816	Indy	-1.04496	2.50709e-07	Isolated Up	73.496	52.847	56.606	106.706	102.077	33.3555	38.5136	56.7029	51.5206	65.8402	85.0762	89.4763	72.1782	52.4918	55.7076	139.029	124.42	51.1489	64.332	92.7907	79.8435	36.3517	35.2715	138.802	82.8172
FBgn0267914	asRNA:CR46195	-1.04702	0.024042	Isolated Up	2.48988	0.943202	1.38529	3.6795	4.09827	0.50577	0.325598	0.608923	0.813812	1.76504	3.76281	2.44685	3.02191	1.2555	3.12597	5.05131	4.38641	2.5355	3.52972	1.4678	3.41436	0.348762	1.86265	5.95837	3.46384
FBgn0051272	CG31272	-1.04793	2.58337e-08	Isolated Up	1.7797	1.71996	0.907606	2.59502	3.04202	1.66904	1.06982	2.55748	1.53372	1.10828	1.05542	1.69165	1.6313	1.10603	1.493	2.93681	1.87595	1.26775	0.910896	1.88262	2.45134	1.04629	1.82302	3.39596	1.94185
FBgn0030041	CG12116	-1.04905	0.00394996	Isolated Up	148.781	83.3069	134.087	298.776	334.96	122.118	154.473	71.1709	106.891	57.4255	171.758	99.3241	78.6499	39.7874	139.362	181.084	177.526	121.704	176.942	110.883	193.305	22.6963	46.3682	352.933	295.214
FBgn0032785	CG10026	-1.04934	0.00605554	Isolated Up	11.9107	7.90625	6.97424	18.2426	14.4918	4.52664	0.604682	6.3328	7.23041	6.11608	8.25982	8.97179	6.97981	12.1066	15.3966	31.3064	27.2289	7.46023	16.6239	10.9447	14.2703	6.25088	9.11511	21.8268	16.6894
FBgn0039742	CG15528	-1.04959	4.23693e-08	Isolated Up	15.6133	8.23914	8.69391	11.8519	12.3371	5.4876	11.7215	17.2691	21.9103	13.6278	10.5542	26.281	29.2564	15.7236	11.8974	20.3815	20.6906	13.7015	11.2439	17.4541	28.3217	10.1409	11.5326	16.8254	19.5759
FBgn0034229	CG4847	-1.04983	0.00139325	Isolated Up	231.418	91.657	96.0152	270.501	264.275	75.1827	101.075	101.13	132.714	262.458	262.112	259.427	281.305	193.257	293.328	549.977	451.552	215.274	241.387	244.772	452.797	55.9897	82.5908	307.55	267.713
FBgn0033558	CG12344	-1.05083	0.000862309	Isolated Up	7.2679	5.63147	4.10811	15.4926	12.4638	2.57943	1.58148	3.75097	2.59794	4.35104	7.15851	4.04788	5.53571	6.45685	5.17885	11.7179	8.3866	6.68007	7.54336	12.7316	13.2635	5.36556	4.8746	13.7999	9.13194
FBgn0038681	Cyp12a4	-1.05142	1.72223e-06	Isolated Up	67.554	32.0689	37.4029	82.692	71.8676	66.0788	65.5382	92.7512	113.809	37.148	38.9588	52.6224	43.3764	61.3999	68.4448	156.767	127.178	46.5167	60.4892	60.0204	81.6382	26.6132	32.4577	101.323	64.1335
FBgn0037934	CG6830	-1.05166	0.00283215	Isolated Up	6.36738	3.27346	4.25142	7.39774	6.37978	1.61846	2.3257	2.19212	1.40852	6.77284	9.31525	9.54575	9.38664	3.25832	3.68585	11.0424	8.52454	5.70488	7.14484	11.7105	7.92307	2.70961	4.31977	13.059	9.86669
FBgn0038466	CG8907	-1.05184	0.0231147	Isolated Up	1.33401	0.610307	1.19422	2.01404	2.45051	1.11269	0	0.852492	0.939014	1.92923	1.60608	1.32915	1.79175	0.388607	2.28616	2.46692	1.95871	0.438837	1.22402	0.542449	1.35699	0.37559	0.317047	2.99462	1.83688
FBgn0031461	daw	-1.05244	0.00975414	Isolated Up	29.4049	13.7596	20.5406	37.4147	37.7294	5.41174	5.39562	12.7874	11.5186	17.24	24.8712	21.4175	14.5212	24.4523	35.2255	61.9667	60.0028	25.2087	57.5288	45.0552	62.8593	7.05572	12.4837	50.2293	41.0412
FBgn0030562	CG9400	-1.05365	0.001619	Isolated Up	8.40651	3.41217	4.25142	6.42945	4.73202	4.72895	2.46524	7.30708	5.66539	9.03045	5.87365	8.30722	8.37042	4.93232	4.8056	8.04686	6.34513	13.5064	5.75003	32.7065	20.6175	5.0168	7.25246	10.8671	11.3362
FBgn0037730	CG9444	-1.05487	9.39407e-08	Isolated Up	7.60687	5.9921	7.69077	8.86954	8.45004	3.38866	3.30249	7.23401	8.79543	5.25408	5.59833	10.0291	5.402	5.50028	2.84603	8.81043	9.73839	6.68007	4.21289	12.3487	15.0582	7.53862	6.14279	12.5033	11.1788
FBgn0031515	CG9664	-1.05531	9.21912e-06	Isolated Up	9.856	8.32237	10.5091	17.7003	20.8716	7.10607	5.20957	12.1297	12.8645	8.2095	12.298	13.0499	12.2213	4.09532	3.54588	10.4844	6.73135	5.21728	7.00251	7.08374	7.66042	5.74115	6.69762	19.5113	12.2809
FBgn0029969	Acat1	-1.05822	1.4285e-09	Isolated Up	50.8221	29.2115	38.215	71.7697	70.9804	31.383	52.8864	39.6774	62.1627	29.6363	40.519	59.2078	38.4291	29.295	49.6889	84.7564	78.3209	38.0813	36.8059	51.5965	70.1257	21.4623	33.607	98.5137	63.3987
FBgn0031914	CG5973	-1.05849	5.7684e-06	Isolated Up	67.3811	41.5286	39.7436	112.399	93.542	31.2819	20.1406	53.5122	45.73	41.5811	40.5649	63.7994	62.4706	61.5195	64.1991	143.551	110.847	61.0958	76.7145	65.5406	71.5265	45.339	47.24	125.033	98.2471
FBgn0030271	CG15202	-1.05872	8.07777e-15	Isolated Up	15.5693	13.5377	11.7989	22.5805	22.8996	9.98895	5.25608	15.9781	18.2482	10.6313	8.16805	14.3488	17.6768	11.7479	12.1306	22.1436	19.1733	12.8725	14.6313	21.1555	22.8062	8.93367	12.1667	22.012	22.7774
FBgn0028936	NimB5	-1.05979	0.00321147	Isolated Up	10.2943	3.85603	6.49655	13.2075	11.1963	1.64375	4.83746	5.96745	7.04261	11.0007	17.2997	11.3884	6.36473	4.66328	6.85847	12.2465	12.1937	4.48589	7.60029	8.55155	13.4823	7.43131	10.8589	30.1005	28.288
FBgn0265274	Inx3	-1.06004	1.23322e-10	Isolated Up	46.7475	42.9157	34.7757	72.4668	71.3606	24.9092	16.1869	39.9941	39.3447	35.8345	37.7658	58.8755	70.4934	31.7462	31.9129	68.3396	57.6027	46.0779	33.5324	81.7183	62.2026	32.3812	27.9794	54.2427	49.281
FBgn0005638	slbo	-1.06009	0.000365187	Isolated Up	1.46459	1.16513	1.38529	1.89785	1.81676	0.581635	0	1.51013	1.56502	1.43666	1.10131	2.35623	2.83471	1.13593	1.02644	1.70335	1.3242	0.780154	0.939362	1.30826	1.61963	1.26091	1.58524	1.66711	3.14894
FBgn0028479	Mtpalpha	-1.06089	1.33047e-08	Isolated Up	123.277	87.0797	102.416	206.207	218.941	57.5313	75.3992	82.5943	101.758	79.8374	114.261	121.195	97.3696	79.4552	111.369	201.348	179.264	94.8375	106.717	154.63	191.204	54.5946	79.2222	199.343	162.066
FBgn0265530	lncRNA:CR44380	-1.0617	0.0493314	Isolated Up	0.673524	0.527083	0.812069	2.09151	1.43651	0.126442	0	0.462781	0.62601	0.861998	0.825982	1.1177	2.40683	0.358714	0.419907	0.176209	0.303463	0.536356	0.683172	0.414814	0.306417	0.321934	0.277416	0.493958	0.577306
FBgn0036742	CG7497	-1.06218	9.8776e-05	Isolated Up	8.64057	8.93267	8.35953	9.29558	10.1823	3.54039	2.83735	5.52902	4.85157	8.57893	10.3707	19.0009	19.5221	4.93232	4.52566	11.6298	8.88318	4.68093	5.00993	13.3698	7.74797	4.58756	7.49024	12.4416	11.0738
FBgn0052194	lncRNA:CR32194	-1.06246	0.000462978	Isolated Up	1.40171	0.970943	1.00314	2.28516	1.39426	0.556347	0.511654	1.09606	1.28332	0.65676	0.504767	2.47706	1.4441	1.16582	1.39969	2.55503	2.70358	1.90163	2.07798	2.5527	1.48831	0.563384	0.554833	1.23489	1.25958
FBgn0264345	lncRNA:CR43801	-1.06418	0.037173	Isolated Up	0.555276	0.277412	0.238844	0.23239	0.211251	0.455193	0	1.19349	0.65731	0.451523	0	0.694785	0.347653	0.328821	0.186625	0.352417	0.910388	1.26775	0.370052	1.05299	0.612834	0.482901	0.634095	1.26577	1.10213
FBgn0034322	CG18536	-1.06468	0.00601852	Isolated Up	0.623012	0.138706	0.0477688	1.00702	0.887255	0.480481	0.976794	0.779421	1.37722	0.574665	0.87187	0.906242	0.962732	0.448393	0.559875	0.998516	1.02074	0.195039	0.284655	0.414814	0.437739	0.187795	0.554833	0.52483	0.314894
FBgn0000055	Adh	-1.06704	0.00429053	Isolated Up	6.96934	6.7966	6.20994	8.59842	11.6611	2.27596	2.83735	5.72388	6.2914	1.23143	2.38617	2.74893	3.23585	5.32092	5.73872	15.7119	16.856	6.58255	13.2649	13.0188	10.7684	2.65595	3.24973	6.6993	7.40002
FBgn0032791	CG18094	-1.06724	1.20817e-05	Isolated Up	1.91455	0.638048	1.05091	3.25345	2.45051	0.682789	2.3257	1.26656	2.75444	1.68295	1.10131	1.44999	2.8882	1.46475	1.35303	3.3186	2.45529	1.51155	2.07798	3.03133	1.96982	1.26091	0.990773	2.87113	2.0993
FBgn0052068	Adi1	-1.06886	1.76375e-10	Isolated Up	29.1014	19.5021	22.929	53.7595	47.4892	20.5343	26.3269	26.1593	34.274	18.0199	18.4011	29.9966	27.4646	20.9848	26.2675	40.4693	37.9604	18.3336	21.9184	22.4319	29.81	14.7553	17.9132	61.7447	40.9888
FBgn0037818	CG6465	-1.06898	0.00209546	Isolated Up	7.11864	6.15855	3.20051	7.90125	8.78805	1.26442	4.6514	3.6779	3.06745	6.73179	5.64421	6.43432	5.05434	2.80993	3.17263	8.28181	6.34513	5.8024	5.66464	12.3487	8.09816	7.59227	7.29209	20.3449	20.5206
FBgn0013348	TpnC41C	-1.06906	5.49154e-06	Isolated Up	29.104	12.7887	29.9032	53.101	42.208	14.5662	26.1874	29.0334	27.607	15.2697	16.795	37.458	46.3181	24.0637	22.0218	21.5856	30.6221	31.45	20.4382	57.2124	66.8427	17.76	12.4045	20.8697	21.9901
FBgn0039628	CG11841	-1.0705	0.000254346	Isolated Up	63.49	16.4505	15.8592	51.7454	52.01	45.7469	44.793	48.0075	56.9982	52.746	58.0482	59.6911	72.0444	36.4991	70.4043	113.008	114.295	63.7289	82.55	73.8369	114.644	17.9478	31.784	131.887	99.0343
FBgn0034909	pippin	-1.07215	3.20442e-07	Isolated Up	56.4782	35.2868	39.6481	76.6111	87.5425	14.0604	26.9316	59.3578	65.5119	53.4849	61.9487	59.5703	60.1707	43.1653	48.7558	113.948	102.626	36.8623	55.2231	60.1799	63.9098	27.2302	31.7444	72.6118	59.0952
FBgn0032167	CG5853	-1.07315	0.000995729	Isolated Up	19.2486	20.695	14.8083	32.2247	27.5049	3.41395	3.34901	13.2258	10.8613	12.8889	27.7163	18.4873	10.8842	9.92442	15.9565	30.3666	24.3046	15.1643	16.3961	34.0147	26.133	8.42394	13.1971	43.1596	28.8653
FBgn0011768	Fdh	-1.07353	4.58674e-07	Isolated Up	68.4835	32.5405	50.7782	84.3574	107.738	30.6244	32.0481	39.1659	56.8417	45.7269	69.4743	82.8909	65.9739	47.8584	77.8693	123.581	104.915	44.1762	54.4545	68.9548	101.205	36.7273	54.2151	123.582	107.904
FBgn0043792	CG30427	-1.0737	0.0004121	Isolated Up	10.0004	3.6341	3.24828	11.5807	13.6468	2.78173	3.44204	5.65081	5.47758	6.52655	6.65375	10.603	7.80883	7.47321	7.46501	18.7075	15.2559	7.16767	12.9518	15.2524	16.2401	10.9458	11.4533	18.9865	17.0568
FBgn0032780	CG13085	-1.07531	0.0130629	Isolated Up	0.828424	0.582566	0.668763	1.39434	1.73226	0.429904	0	1.0717	1.22072	0.697808	0.504767	0.362497	0.855762	1.10603	1.16641	1.67398	1.24144	0.487597	0.711638	1.34017	1.48831	0.214623	0.356678	0.154362	0.419859
FBgn0262537	CG43091	-1.07678	0.000252269	Isolated Up	5.60643	1.47028	1.57637	4.91891	5.40803	4.70366	3.72112	3.23947	3.78736	2.4218	4.81823	6.64577	7.5414	4.27468	5.27216	10.6019	8.24866	6.58255	7.3441	10.0193	10.7246	2.19988	2.81379	9.29258	6.92768
FBgn0085209	CG34180	-1.07752	0.0282065	Isolated Up	4.69139	1.08191	1.57637	2.2077	1.26751	1.71962	1.72102	1.53449	1.43982	3.16066	4.72646	5.89057	6.0973	4.66328	5.31882	12.8339	11.3385	7.16767	4.75374	11.7424	13.8325	1.28774	2.10044	3.2416	1.88937
FBgn0032414	CG17211	-1.07865	5.50006e-06	Isolated Up	41.7229	42.2499	30.9542	44.1928	40.9405	16.6145	17.8149	50.5406	46.4499	22.1246	17.0703	60.6578	38.0814	41.7005	17.9627	52.5983	58.5683	40.7631	22.9147	94.6733	94.9893	46.2512	30.5554	33.373	39.3093
FBgn0033735	Dera	-1.07896	7.64742e-07	Isolated Up	12.5267	6.99079	8.4073	18.9398	17.5761	7.2578	15.2101	8.91463	12.395	8.2916	12.1144	14.9832	11.8202	6.33728	11.0575	21.8499	21.0493	9.94697	10.0768	10.4023	16.8967	3.97052	5.74648	22.8764	17.5291
FBgn0036857	Aldh7A1	-1.07903	1.08672e-06	Isolated Up	41.378	23.7742	25.1264	40.3196	40.5602	19.0169	16.3264	37.0225	38.4996	31.2371	37.6281	41.8684	30.1923	34.9746	42.8771	88.3393	79.5072	25.5013	34.3009	50.5754	55.1988	24.1719	32.4973	95.2721	48.2838
FBgn0026593	CG5707	-1.07984	0.0013081	Isolated Up	27.8239	18.7253	20.3017	46.4005	43.56	7.89001	8.46555	9.30434	12.2698	20.4417	23.4028	28.2143	25.8868	25.3491	38.4448	51.0124	50.4851	18.0898	35.7242	31.7173	48.3701	6.73378	10.2248	44.8267	41.9334
FBgn0013674	mt:CoI	-1.08096	0.000101375	Isolated Up	3120.49	1470.87	2728.07	7233.86	6199.12	1345.09	2296.77	5147.62	1769.07	744.561	2082.07	3474.08	2533.22	2790.05	1643.61	4447.12	3951.47	2193.26	2541.86	4681.72	2351.79	4021.17	2032.47	5066.28	2146.53
FBgn0036501	CG7272	-1.08162	1.08447e-07	Isolated Up	39.5028	36.0081	43.6606	59.1819	64.2626	16.2352	17.4893	29.5937	26.5428	31.6476	30.6072	66.9713	78.115	30.5206	27.0606	47.6644	42.871	26.0377	24.1672	64.0409	43.2486	23.5012	25.7997	52.6374	40.2015
FBgn0284247	ds	-1.08456	0.000376577	Isolated Up	7.03124	6.7966	3.72596	13.4011	11.3231	2.8576	0.511654	4.9201	3.91256	3.61218	6.65375	8.2468	6.2845	5.35082	4.71229	11.4242	9.65563	7.70403	6.86019	14.0399	12.1691	4.69487	5.19165	7.0389	7.66243
FBgn0033879	Echs1	-1.08558	3.77426e-08	Isolated Up	81.9304	48.353	54.6952	90.6707	88.641	42.5858	42.9324	46.9601	77.5313	52.2945	65.2985	99.5053	79.7998	50.6086	83.7947	125.784	119.785	54.8059	69.7974	88.7383	122.873	51.5362	70.3845	193.107	145.849
FBgn0036208	Gcat	-1.08746	5.63402e-06	Isolated Up	11.4006	5.82566	5.11126	8.13364	9.2528	11.9109	8.23298	13.0553	17.2466	4.39208	8.3516	10.5426	6.89958	6.69599	10.4044	16.8867	15.4214	9.11806	10.5607	11.8381	16.7654	6.06309	8.87732	32.1381	19.8908
FBgn0037386	CG1208	-1.08777	2.2762e-08	Isolated Up	9.66318	6.82434	5.97109	14.6405	11.3653	5.08299	5.11654	7.11222	6.2288	5.95189	12.7568	13.8957	14.1201	6.96503	7.46501	11.806	14.4007	6.87511	6.20548	18.9219	15.1458	5.41922	6.14279	12.5342	10.9688
FBgn0003149	Prm	-1.08793	0.000297442	Isolated Up	289.489	224.26	204.976	392.196	285.569	152.414	133.216	159.246	128.551	226.418	222.465	360.412	369.743	156.579	122.426	181.319	195.513	296.459	172.729	881.192	922.184	225.434	274.087	333.483	326.86
FBgn0029898	CG14439	-1.08823	1.71048e-07	Isolated Up	35.3347	16.617	16.8146	38.1119	41.3207	14.1616	14.6054	29.8616	24.8839	31.2782	28.6799	42.5631	38.2686	23.8545	25.5676	58.8243	45.1332	33.6929	40.9049	54.8831	60.5392	21.7842	27.3057	61.0655	57.3108
FBgn0013949	Elal	-1.08903	0.00381197	Isolated Up	44.2059	17.1163	22.4035	80.949	87.12	20.7619	29.9085	25.5261	33.7106	62.6795	101.963	33.3195	27.9727	12.0468	26.6407	65.4909	72.3068	21.4055	31.1413	37.78	59.4887	8.90684	14.5049	94.3768	73.4229
FBgn0032477	Alg7	-1.09158	4.97832e-14	Isolated Up	31.5854	27.2696	21.5437	39.1576	35.7014	15.957	12.3262	43.9155	42.7565	21.9604	23.4946	30.4195	22.4637	26.0964	23.6081	50.6894	50.5679	18.7725	22.1462	50.9902	51.6532	23.8768	25.0864	40.5972	37.0001
FBgn0035076	Ance-5	-1.09343	0.0460324	Isolated Up	27.9427	6.76886	7.06978	33.4641	36.8422	4.37491	3.30249	16.7332	17.5596	50.4884	76.4493	22.6862	13.0504	12.286	21.4619	53.8611	52.03	7.21643	18.0471	20.3897	28.847	11.1067	14.386	82.5836	59.62
FBgn0040582	BomBc3	-1.09363	0.0039988	Isolated Up	49.5693	10.6249	25.7951	46.1293	39.842	18.3847	32.4203	17.4396	19.062	14.9413	34.37	66.8806	51.5062	21.3435	50.0622	48.8979	71.0102	69.58	72.3024	61.4244	165.203	22.4281	40.6217	110.986	78.4087
FBgn0030239	Pgls	-1.09445	7.87171e-07	Isolated Up	23.486	9.40428	17.77	26.8023	37.3069	9.02799	25.8618	15.3692	25.8855	9.8514	17.6668	25.556	16.928	15.8133	22.4417	43.6704	37.8776	20.8204	17.9617	30.3133	33.881	12.9847	15.4164	42.8817	32.1717
FBgn0031111	Obp19c	-1.09457	0.0117709	Isolated Up	6.25925	1.52577	1.43306	1.35561	1.14076	3.59097	4.18626	7.81857	13.2714	5.37722	4.5429	13.9259	12.7829	2.0925	2.84603	3.58291	3.28291	5.36356	3.89977	6.03076	8.97364	8.26297	8.95659	13.1208	12.8582
FBgn0035089	Phk-3	-1.09501	0.000172737	Isolated Up	10.8314	6.325	7.06978	16.887	21.2096	4.47606	5.48865	4.16503	6.94871	8.04531	8.30571	20.6925	25.4322	9.5956	14.79	14.8015	14.2352	6.43627	11.6139	9.31736	12.3442	3.83638	4.95386	11.7006	11.2837
FBgn0034733	CG4752	-1.09536	5.89715e-06	Isolated Up	20.3393	11.8732	10.4614	24.9432	28.1386	9.05328	12.5123	12.3002	12.2385	23.6434	24.3665	37.1257	33.0805	11.4191	16.1431	27.8703	22.1804	17.9923	13.6634	39.8859	35.807	9.0678	9.8681	26.612	17.8965
FBgn0003248	Rh2	-1.09553	0.0010317	Isolated Up	133.503	44.0808	66.3508	248.424	254.684	15.8559	21.722	162.704	173.154	127.329	133.121	94.5814	88.812	125.669	149.113	179.439	164.118	103.614	118.616	115.063	113.724	110.423	85.4442	240.002	268.028
FBgn0035811	Mcad	-1.09592	4.68584e-07	Isolated Up	125.703	74.4297	93.6745	202.721	201.829	63.2971	60.1891	70.4159	85.2625	73.9265	103.202	131.284	91.6735	94.2222	133.484	222.845	184.064	77.8692	98.633	143.238	174.658	71.6571	103.595	269.238	191.456
FBgn0030234	CG15211	-1.09944	9.06957e-09	Isolated Up	16.6944	9.84814	9.26714	17.313	17.0691	8.11761	8.41903	15.2231	12.0194	11.0418	12.0685	28.5466	22.3033	11.9272	10.4977	19.2067	17.9871	15.1643	12.4394	38.1629	27.2273	16.7137	12.8404	23.8026	23.4596
FBgn0004629	Cys	-1.10073	1.34295e-07	Isolated Up	404.837	156.571	201.059	283.864	315.44	212.474	336.203	364.867	494.548	276.085	361.597	501.877	598.846	235.167	419.86	446.601	419.992	339.026	339.394	679.337	679.414	218.7	264.893	844.019	726.252
FBgn0262029	d	-1.10315	0.0361432	Isolated Up	2.53815	1.8864	1.09868	1.31687	0.971755	0.783943	0	1.80241	0.688611	1.724	3.30393	3.50413	3.71722	1.43486	0.979782	3.55354	2.89669	3.31566	0.711638	11.6786	3.93965	1.52919	4.28014	2.43892	3.35887
FBgn0000045	Act79B	-1.10558	0.000144343	Isolated Up	146.853	89.9648	160.837	157.947	107.738	94.6295	42.9789	153.351	112.87	146.581	88.3342	130.952	257.237	102.801	62.1928	84.8151	159.401	84.403	123.17	247.644	609.376	113.562	104.388	141.519	147.79
FBgn0030575	CG5321	-1.10719	0.000770387	Isolated Up	18.2308	10.3197	16.6713	37.2211	44.6162	8.72453	8.27949	7.03915	8.32593	14.2845	22.531	14.6509	10.7238	10.7614	20.1555	30.0436	27.422	9.89821	15.3998	15.5396	17.3782	5.47288	9.15474	43.2213	29.705
FBgn0260006	drd	-1.10788	0.000157491	Isolated Up	14.8488	10.2365	7.54746	14.4856	13.5201	3.84385	7.53527	11.667	9.51535	18.0199	18.1257	34.0445	32.2248	8.99774	7.13841	15.2127	15.918	10.0445	6.83172	38.9606	19.9171	11.375	13.5538	13.7999	13.8554
FBgn0039131	CG12268	-1.10814	0.0143396	Isolated Up	6.1586	2.82961	2.10183	5.42242	4.14052	1.74491	0.604682	2.84976	2.56664	2.70914	18.2175	8.30722	7.94254	2.48111	2.70606	9.45653	7.31069	4.19333	3.92824	12.0934	7.83552	3.13886	6.26168	15.5288	13.4355
FBgn0036727	SecCl	-1.10842	0.0163636	Isolated Up	8.96579	3.43991	3.96481	8.01744	7.09804	1.01154	1.30239	2.84976	1.90933	4.96675	7.89272	9.51554	8.4239	12.7941	13.6703	27.8703	25.546	9.21557	7.37257	12.7635	15.9337	3.48762	4.8746	10.8671	10.3915
FBgn0052037	CG32037	-1.10953	0.000846575	Isolated Up	1.60149	1.24836	0.477688	1.89785	1.64776	1.77019	1.81405	3.92146	3.31785	0.246285	1.56019	2.02394	2.27312	1.31528	1.86625	2.37882	2.48288	0.828914	0.939362	1.43589	1.61963	0.885318	0.277416	1.42013	0.787236
FBgn0004646	ogre	-1.11027	1.4285e-09	Isolated Up	67.4561	54.1509	42.8008	100.818	97.8093	31.6865	31.9086	52.27	42.2556	45.1523	39.8307	75.641	59.6626	55.6007	42.2706	106.988	98.6529	54.1232	56.0486	115.478	96.5214	58.5651	45.2585	123.767	91.6868
FBgn0035298	SCOT	-1.11216	3.62855e-07	Isolated Up	36.3718	20.0014	30.3332	62.4353	48.799	15.0972	38.6997	25.7209	38.75	18.9639	35.196	42.1704	25.8333	19.5499	31.7729	49.544	51.2852	23.5509	25.7613	33.8552	46.0501	17.7868	23.6597	89.2211	58.8853
FBgn0050163	Cpr60D	-1.11669	0.0154502	Isolated Up	2.71541	0.610307	1.09868	2.47882	2.66176	0.657501	0.046514	1.02299	1.15812	1.55981	1.28486	3.80621	3.71722	2.24196	3.07932	3.52417	2.81393	3.5107	4.1275	3.50996	7.7042	1.20725	3.01195	5.40266	4.93335
FBgn0015622	Cnx99A	-1.1168	1.51907e-13	Isolated Up	432.662	262.793	254.99	588.604	649.893	243.225	185.033	482.413	483.999	426.401	365.681	390.681	327.677	253.282	342.271	647.743	675.039	381.447	339.508	599.151	725.508	224.576	283.599	572.775	677.6
FBgn0040211	hgo	-1.11805	0.000166892	Isolated Up	16.8516	4.29989	5.44564	30.9465	29.0259	10.0648	8.88417	10.4004	10.5483	8.86626	10.8754	15.2853	10.9377	10.6418	18.8025	32.0406	28.3875	19.3576	21.8615	16.6245	23.8568	7.75324	12.246	35.8737	21.4128
FBgn0015522	olf186-M	-1.12108	1.3793e-08	Isolated Up	24.5541	16.7557	13.0409	54.263	37.4759	14.6167	7.81435	19.2176	25.2908	14.7771	19.9154	25.7373	27.7588	21.5228	27.1073	41.6146	39.5605	16.5295	23.1709	27.1544	25.9579	13.1993	13.5538	32.5086	30.7547
FBgn0000261	Cat	-1.12393	3.64493e-09	Isolated Up	215.082	131.188	157.924	246.565	236.136	101.533	140.565	129.725	157.692	214.391	180.752	396.36	392.313	150.182	183.173	331.36	309.283	124.483	144.149	304.378	273.368	94.9705	156.542	317.738	287.184
FBgn0034660	Loxl2	-1.12422	0.00249518	Isolated Up	10.3057	5.93662	5.82779	14.5244	11.0273	5.41174	8.13995	5.35852	4.69507	9.44093	10.9672	18.9102	12.3818	2.78003	2.05288	5.81489	5.18645	13.8965	2.93195	30.76	22.9375	10.0336	7.01467	16.455	14.8525
FBgn0001125	Got2	-1.12795	4.12675e-07	Isolated Up	265.833	140.703	139.389	227.471	205.547	128.718	195.173	202.309	311.283	161.44	243.114	350.685	263.494	171.615	269.347	628.36	600.663	219.418	235.637	382.809	480.943	121.315	151.271	326.815	222.473
FBgn0050438	Ugt50B3	-1.12836	0.00209386	Isolated Up	4.10487	1.7477	2.67505	11.7744	9.12605	1.44144	1.53496	1.16913	0.813812	3.69428	4.26758	3.92705	3.71722	2.57078	3.40591	7.84128	6.73135	3.60821	4.18443	5.39258	3.63323	2.57547	1.98155	6.97715	3.72625
FBgn0032639	CG18563	-1.12889	0.049737	Isolated Up	0.478224	0.305153	0.429919	0.464779	0.380252	0.151731	0	0.267926	0.563409	0.246285	1.10131	1.60103	0.802277	0.239143	0.466563	0.146841	0.165525	0.487597	0.227724	0.0957263	1.13812	0.187795	0.118893	1.04966	0.839718
FBgn0000206	boss	-1.1335	1.18754e-11	Isolated Up	215.808	130.301	97.4483	250.245	236.981	78.7484	112.983	280.762	252.595	169.075	176.118	241.513	173.452	180.373	153.173	353.739	325.643	172.17	120.551	384.086	388.756	180.605	181.866	277.851	260.365
FBgn0039207	Cftr	-1.13351	1.84746e-05	Isolated Up	32.7709	20.0014	17.3878	35.362	36.3774	12.6948	10.6517	25.0633	22.9746	31.6476	40.3355	31.0237	19.014	24.9904	21.1353	79.5582	64.2789	27.9393	28.1239	63.0836	56.2932	15.7479	16.9224	48.1609	37.7348
FBgn0010225	Gel	-1.13379	4.53836e-06	Isolated Up	306.842	173.244	182.142	517.88	467.879	167.637	163.636	223.231	286.556	269.477	331.678	241.846	165.697	183.602	273.173	656.495	651.396	185.433	250.753	218.224	312.37	144.763	190.189	676.969	429.936
FBgn0020415	Idgf2	-1.14233	4.01456e-05	Isolated Up	87.0025	45.2459	57.3703	199.623	188.267	44.5077	59.3984	59.504	80.1918	102.742	110.452	76.8795	62.5776	43.7631	69.6112	152.274	138.379	59.3405	71.7331	80.8249	104.269	21.5696	24.3334	138.216	96.9875
FBgn0037709	CG8199	-1.14316	1.45266e-07	Isolated Up	11.7583	7.68432	7.59523	15.3377	14.4918	6.17039	2.93038	9.79148	10.5483	7.14227	8.85637	13.8353	9.62732	9.32656	14.2302	21.3212	20.1113	9.0693	10.5038	16.7521	18.1662	6.1704	6.22205	23.2469	13.0681
FBgn0264871	asRNA:CR44062	-1.14358	0.0228054	Isolated Up	0.636069	0.0554825	0.286613	0.271121	0.169001	0.278173	1.02331	1.02299	0.62601	0.32838	0.780095	1.60103	1.09644	0.62775	0.0466563	0.646098	0.99315	0.390077	0.483914	1.75498	1.22567	0.61704	0.237785	0.493958	0.20993
FBgn0030261	CG15203	-1.14382	7.91731e-08	Isolated Up	16.9507	9.70943	15.6682	27.6931	30.1244	7.96588	5.44214	10.985	16.5267	15.1055	20.053	20.4509	23.373	9.41624	14.2302	27.1361	28.9669	11.7511	12.2402	16.9755	25.2575	7.69959	9.07548	21.9194	19.0511
FBgn0034439	CG10062	-1.14617	0.00751582	Isolated Up	3.22305	2.85735	2.86613	9.64417	7.64729	0.809232	0.139542	0.974277	0.970315	2.46285	3.67103	2.17498	1.97895	2.36153	2.05288	6.96024	6.09684	2.58426	2.78962	3.03133	3.63323	1.52919	2.10044	4.29126	3.72625
FBgn0063492	GstE8	-1.14696	0.0064685	Isolated Up	5.87134	1.60899	1.95852	4.68652	4.68977	1.44144	0.418626	2.67926	3.72476	2.91437	5.46066	8.39784	5.85662	5.17146	8.86469	16.4461	13.7938	5.11976	7.82801	4.7225	6.8725	2.46816	4.59719	10.5892	10.6014
FBgn0037164	CG11438	-1.14718	0.000106671	Isolated Up	10.0749	7.93399	7.06978	12.8976	10.1401	3.18635	2.69781	5.57773	4.72637	12.068	13.1698	16.4332	13.2108	6.33728	6.20529	14.2142	13.5731	6.97263	9.16589	18.0604	21.3179	2.70961	4.79534	14.8496	14.4851
FBgn0026576	Pisd	-1.14787	2.27639e-07	Isolated Up	71.8539	43.2763	49.2018	120.959	86.5707	44.6342	36.2344	72.3888	88.8308	61.8996	76.6787	53.136	38.9372	41.4614	55.1477	108.016	129.275	39.6416	70.1675	59.2546	91.5311	27.5522	38.759	164.982	125.958
FBgn0029662	CG12206	-1.14833	0.0274963	Isolated Up	0.874128	0.110965	0.0477688	0.387316	0.253501	0.733366	1.02331	0.828135	1.37722	0.082095	0.367103	0.845826	1.14993	1.01636	0.419907	0.910411	0.855213	1.46279	0.398517	2.32934	3.32681	0.885318	0.43594	0.52483	1.2071
FBgn0038194	Cyp6d5	-1.14906	0.000428425	Isolated Up	188.325	61.5855	65.1088	221.041	205.378	59.3015	104.889	86.3209	115.436	310.114	309.927	253.597	234.907	111.68	141.695	439.259	334.443	108.832	100.312	215.544	280.503	74.8228	86.9106	331.384	266.821
FBgn0046875	Obp83g	-1.15002	0.0268615	Isolated Up	2.02608	1.55351	1.71968	2.47882	1.52101	0.354039	0.604682	1.12042	0.0939014	0.451523	1.37664	1.99373	0.668564	1.07614	0.653188	1.14536	1.68284	2.92558	2.13491	8.13673	5.16532	1.26091	2.21933	3.82817	4.461
FBgn0036759	CG5577	-1.15109	1.19008e-08	Isolated Up	19.7284	10.6526	11.6556	26.7248	27.8006	8.21876	8.93069	15.4179	17.497	14.7361	21.2002	26.2206	20.9662	12.3756	17.8227	37.6793	33.1878	15.6031	17.1932	17.9008	23.6817	10.0604	12.0874	38.6831	27.1859
FBgn0037935	CG6834	-1.15147	2.45448e-07	Isolated Up	17.9375	10.0423	13.5186	33.9676	31.1807	5.89222	12.5123	13.9078	15.0242	12.2732	12.298	14.5603	12.9701	14.8567	12.2706	30.6309	32.3326	8.77674	14.1758	15.9544	20.7926	15.1041	13.3556	36.1824	27.9206
FBgn0040734	BomS5	-1.15155	0.0422975	Isolated Up	10.512	1.49803	9.07606	18.6299	14.9988	3.59097	8.83766	3.28818	3.50565	1.27247	3.76281	9.002	6.52518	3.13875	14.3701	5.63868	9.4901	11.1172	20.1251	10.6894	47.0569	1.12677	7.09393	17.5664	20.888
FBgn0029866	CG3842	-1.15326	6.51559e-05	Isolated Up	22.3749	10.3197	10.3181	30.1719	31.6877	9.20501	2.79084	14.0296	13.2401	22.9456	28.1293	28.0633	24.202	18.6531	16.563	44.6983	34.5947	15.3593	21.463	34.972	31.0794	10.0336	16.0901	38.1582	30.2299
FBgn0032684	Ugt301D1	-1.15468	0.00292697	Isolated Up	13.3786	9.57072	5.15903	18.2813	14.4496	2.78173	4.60489	9.1582	4.82027	15.6801	33.4523	14.4999	13.1573	5.53017	6.71851	21.5268	17.9595	9.55689	6.14855	28.9732	25.5202	2.8974	6.22205	24.7905	19.6284
FBgn0039629	CG11842	-1.15529	3.8631e-05	Isolated Up	18.3453	13.3713	12.802	31.7212	27.3781	11.0511	13.21	6.64944	13.3966	10.7955	23.2193	24.68	21.5278	6.18782	16.6096	24.7279	30.7049	14.0915	17.7909	23.1019	29.1972	4.61439	5.70685	37.7569	19.9958
FBgn0267236	CG45676	-1.15585	0.000925811	Isolated Up	0.480792	0.610307	0.525456	0.619706	0.760504	0.0758655	0.418626	0.560209	0.438207	0.287333	0.183552	0.573953	1.23016	0.269036	0.513219	0.557994	0.303463	0.146279	0.284655	0.925354	0.437739	0.37559	0.237785	0.679192	0.524824
FBgn0032161	CG4594	-1.15722	0.00808062	Isolated Up	2.71876	1.63673	2.38844	3.91189	4.01377	1.99779	1.53496	2.33826	4.16296	1.97028	2.34028	3.77601	3.10214	0.328821	0.839813	0.352417	0.303463	2.34046	4.0421	3.6376	5.42796	1.31456	1.34745	7.47111	4.67093
FBgn0033246	ACC	-1.15789	7.51243e-10	Isolated Up	332.894	240.35	188.639	647.011	561.59	219.732	175.823	275.355	294.068	259.338	295.564	312.11	187.813	221.327	228.336	663.102	587.724	202.743	250.952	380.065	508.74	176.151	238.34	539	335.572
FBgn0015776	nrv1	-1.15902	4.3502e-06	Isolated Up	123.058	102.753	99.98	248.967	201.238	38.0339	42.1882	64.5215	57.9998	71.3406	93.8867	127.448	96.3534	82.7733	80.1088	172.626	164.394	86.5484	84.0302	215.671	198.383	105.487	106.132	236.143	176.393
FBgn0027578	Nepl21	-1.15938	0.0377987	Isolated Up	39.6801	11.3184	11.369	56.4319	52.01	5.56347	9.20977	20.1188	24.4457	81.233	113.16	37.0049	28.2936	14.5877	24.9611	97.972	86.3765	10.5808	25.2204	36.6632	58.0004	5.71433	8.24323	83.3554	50.4881
FBgn0039719	CG15515	-1.16073	0.00213205	Isolated Up	2.30391	1.7477	3.15274	3.44711	4.01377	0.708078	1.90707	0.560209	0.876413	0.738855	1.10131	3.41351	4.03813	0.777214	1.53966	2.17324	1.93113	2.87682	0.967827	5.8393	5.6906	1.31456	1.82302	1.82147	2.83405
FBgn0050431	CG30431	-1.16156	0.00227732	Isolated Up	12.3491	4.27215	4.49026	18.5137	22.5194	8.19347	10.5122	8.96335	11.1117	5.17199	11.7473	11.5697	8.26345	9.41624	16.1897	26.8131	23.0632	7.21643	19.0434	13.0188	28.4968	0.885318	2.57601	15.2509	9.07946
FBgn0040608	CG14246	-1.16303	6.76566e-05	Isolated Up	3.3254	2.49671	3.10497	4.06682	1.81676	1.87135	1.34891	3.62918	4.19426	3.94056	1.8814	6.7364	7.78208	2.12239	0.933126	2.14387	1.93113	2.7793	1.39481	6.15839	7.04759	2.97789	2.06081	4.1369	3.25391
FBgn0039452	CG14245	-1.16386	0.0440781	Isolated Up	0.147975	0.22193	0.0955375	0.271121	0.126751	0.101154	0	0.219212	0.0939014	0	0.22944	0.302081	0.160455	0.0298928	0	0.176209	0.137938	0	0.113862	0.223361	0.262643	0.268278	0.0792618	0.123489	0.314894
FBgn0031012	CG8051	-1.16437	5.22501e-05	Isolated Up	6.53673	3.60636	3.58266	10.4188	11.1541	1.51731	2.23267	4.14068	4.60117	6.03398	10.4166	8.06555	6.25776	4.6035	6.34526	11.4242	11.0074	5.41232	3.50126	8.42391	7.83552	2.57547	2.93269	11.608	9.18442
FBgn0035044	CG3663	-1.16774	5.16989e-07	Isolated Up	6.76394	3.68958	5.06349	8.44349	10.9851	3.21164	3.16295	4.28682	6.88611	3.07856	6.14898	9.27387	7.40769	4.96221	8.58476	11.6885	11.9178	4.24209	7.17331	7.97719	9.76157	2.30719	3.01195	11.6698	7.40002
FBgn0262952	mt:ND4	-1.16775	0.0227289	Isolated Up	405.841	48.6581	281.692	586.977	540.296	41.4984	257.92	708.762	195.471	23.8076	189.334	500.638	223.247	532.989	212.893	837.226	573.489	445.322	350.297	1068.43	324.102	628.656	191.219	762.239	215.02
FBgn0039736	CG7912	-1.17096	0.0257025	Isolated Up	0.25138	0.22193	0.143306	0.580974	0.338002	0.0758655	0	0.194855	0.876413	0.246285	0.321215	0.211456	0.0267426	0.119571	0.233281	0.352417	0.275875	0.390077	0.142328	0.350996	0.131322	0.0268278	0.118893	0.339596	0.314894
FBgn0036359	CG14105	-1.17202	3.71862e-07	Isolated Up	4.37735	1.4148	1.62414	5.49989	5.07003	4.12202	1.72102	3.62918	4.41337	2.09342	4.49702	4.04788	6.41821	2.36153	4.10575	5.49184	7.03481	3.31566	4.92453	5.36067	6.56608	2.44133	2.65527	8.95298	7.29505
FBgn0035348	CG16758	-1.17271	0.000143711	Isolated Up	153.433	83.9172	110.585	191.876	108.33	53.0805	60.6077	135.254	209.995	47.9024	124.953	209.463	94.8558	112.905	225.35	298.732	349.423	135.844	182.208	159.289	224.122	40.3759	52.7487	325.209	145.376
FBgn0051495	CG31495	-1.17296	3.97007e-05	Isolated Up	1.09742	0.665789	0.716531	2.47882	1.77451	0.758655	0.790738	1.33963	0.438207	0.574665	0.321215	1.17811	1.47084	1.22561	0.513219	1.9383	2.40011	0.828914	0.654707	1.18062	1.05057	0.751179	1.0304	1.57449	0.682271
FBgn0013684	mt:ND5	-1.17845	0.0035866	Isolated Up	368.57	87.4403	236.073	563.157	587.194	103.708	219.36	624.414	184.986	60.1346	157.9	458.649	206.185	471.201	167.963	809.297	432.958	394.661	254.112	926.279	236.817	611.245	140.056	759.337	152.566
FBgn0029769	frma	-1.17853	0.0317167	Isolated Up	19.6364	4.99342	7.26085	38.6541	42.715	4.45077	2.3257	5.69952	5.91579	30.3752	51.8992	16.8561	17.5431	5.4106	14.5568	31.7763	30.6221	9.60565	19.2142	23.3572	30.6855	2.52182	5.03313	41.9864	27.8157
FBgn0032981	CG3635	-1.1813	0.0160726	Isolated Up	0.514259	0.22193	0.334381	0.929558	1.09851	0.177019	0	0.340997	0.0939014	0.0410475	0.642431	0.513537	0.294168	0.358714	0.233281	0.939779	0.965563	0.731395	0.512379	1.05299	0.612834	0.456073	0.396309	1.08053	0.314894
FBgn0036622	Agpat4	-1.18219	0.0039199	Isolated Up	6.65782	7.04627	5.3501	14.1758	15.7171	1.74491	1.25588	2.72798	2.78574	9.11255	13.2157	5.67911	5.72291	2.18218	3.40591	8.98664	6.53824	1.85287	2.76115	9.06209	10.1555	2.03891	3.60641	14.3248	10.339
FBgn0034432	CG7461	-1.18248	3.24728e-08	Isolated Up	87.0921	63.1668	62.0038	147.219	137.651	43.6985	30.048	54.9249	55.0888	63.2132	70.5297	91.4398	72.606	64.2995	68.5381	152.303	132.972	56.9025	62.4818	102.363	103.219	53.3337	61.0712	206.783	134.355
FBgn0023129	aay	-1.18371	7.75789e-11	Isolated Up	197.394	142.59	164.946	343.588	193.591	148.823	176.753	164.141	204.768	96.4616	143.95	343.073	156.711	99.573	145.894	230.863	246.191	156.47	117.221	260.344	241.106	103.77	85.5631	412.671	358.402
FBgn0035813	CG8492	-1.18396	0.0132958	Isolated Up	0.583448	0.22193	0.143306	0.503511	0.802754	0.177019	0	0.535852	0.250404	0.16419	0.137664	0.271872	0.427881	0.687535	0.606532	1.46841	0.634513	0.780154	0.711638	1.05299	0.744156	0.509729	0.475571	1.17315	1.52199
FBgn0031824	CG9547	-1.18421	5.16692e-07	Isolated Up	18.0411	8.98816	9.98367	24.5946	15.7171	7.53597	16.559	11.0093	21.7851	11.6575	12.0226	25.8581	11.8737	8.87817	17.9627	34.0083	32.1394	14.4816	18.1325	19.0495	29.2847	7.45814	10.8192	42.1408	21.0454
FBgn0265313	CG44286	-1.18569	0.00130253	Isolated Up	1.11546	0.832237	0.429919	2.36263	2.83076	0.657501	0	1.4127	0.62601	0.944093	0.917758	1.54061	0.481366	0.358714	1.11975	1.58588	1.15868	1.41403	0.996293	2.13789	1.35699	0.590212	0.673725	1.451	0.892201
FBgn0036764	CG5535	-1.18703	8.0115e-06	Isolated Up	12.5298	4.85471	5.68448	9.25685	10.8583	3.79327	3.81415	12.9092	10.6735	11.9038	14.4547	14.7717	13.3713	6.00846	11.2442	23.4651	24.0287	11.2635	12.781	19.5282	23.5066	5.0168	9.234	19.2952	18.9986
FBgn0038878	CG3301	-1.18875	0.00179251	Isolated Up	72.1093	18.337	27.0849	46.0519	46.095	18.6629	23.1175	37.6558	48.6096	32.838	45.5667	50.0547	53.9665	63.4027	96.7185	165.078	216.286	76.3576	93.8508	148.727	182.887	31.7641	43.5147	80.9164	83.0796
FBgn0027073	Ugt49B1	-1.1894	0.000279487	Isolated Up	39.0585	31.9302	37.6418	86.5651	82.1767	11.7844	15.3961	14.2244	18.2795	43.3051	50.9815	42.2913	28.6413	19.4602	28.9269	84.169	77.6864	19.9915	21.89	34.5572	41.7603	14.1919	17.398	70.0185	44.1377
FBgn0031630	CG15629	-1.19312	5.05571e-06	Isolated Up	8.52876	6.93531	5.97109	9.60544	9.0838	3.36337	7.76784	5.28545	5.00808	8.2095	5.82776	19.6352	21.0464	8.19064	6.15863	11.5417	11.1729	4.53465	5.06686	14.3908	9.36761	3.59493	2.89306	10.4349	9.60428
FBgn0030608	Lsd-2	-1.19435	2.04543e-06	Isolated Up	149.837	121.146	96.254	328.134	334.326	60.136	37.8624	88.0503	82.5081	118.053	115.821	160.616	123.631	122.441	128.818	269.864	241.915	100.591	125.106	173.935	174.001	79.5713	89.4866	244.015	179.805
FBgn0038467	AdSL	-1.19602	1.72223e-06	Isolated Up	33.8457	22.3872	20.5406	69.9105	27.7584	23.7712	22.6058	16.1243	31.0501	23.1508	27.2574	49.1485	22.2498	16.3514	29.9067	61.8199	63.6444	24.9649	25.6474	40.2369	37.9519	14.5675	19.6569	94.4077	27.1859
FBgn0033644	Tret1-2	-1.19759	0.00492184	Isolated Up	1.07149	0.527083	0.38215	1.54926	0.760504	0.354039	0.23257	0.63328	1.06422	0.49257	2.79916	1.99373	1.68478	0.179357	0.793157	1.17472	1.40696	0.731395	0.597776	0.925354	1.0068	0.402417	1.10967	3.02549	1.88937
FBgn0037548	CG7900	-1.19891	0.000434063	Isolated Up	11.5237	6.01985	6.54432	23.2777	20.2379	2.32654	3.53506	4.87138	7.73122	17.8146	17.2997	13.8051	9.01224	5.38071	8.25816	20.1172	18.3457	4.97348	8.22653	10.0193	12.388	5.25825	6.22205	26.7972	18.1064
FBgn0086044	snoRNA:Me28S-U1688	-1.19984	0.0165543	Isolated Up	0.256652	0.0832237	0.286613	0.7359	0.507003	0.0758655	0	0.146142	0.0313005	0.369428	0.275327	0.241664	0.267426	0.0896785	0.0466563	0.323049	0.248288	0.195039	0.25619	0.414814	0.437739	0.134139	0.237785	0.493958	0.262412
FBgn0038732	Acsx2	-1.20108	0.0398911	Isolated Up	2.07003	0.832237	3.10497	6.15832	2.36601	0.935674	0.837252	0.63328	4.13166	2.58599	1.00953	0.211456	1.95221	3.37789	0.186625	4.58142	5.0761	0.585116	0.426983	0.670084	2.80153	0.134139	2.41749	3.98253	0.682271
FBgn0040064	yip2	-1.20783	1.17359e-06	Isolated Up	101.071	56.4811	76.7644	126.691	132.201	33.8613	32.6528	59.6014	72.4293	57.1792	97.42	117.66	105.071	72.6695	121.073	202.141	189.719	67.7272	75.7467	119.115	123.617	44.8293	64.3606	219.719	156.975
FBgn0014931	CG2678	-1.20785	0.00217797	Isolated Up	1.39306	0.859978	1.62414	3.0598	2.95752	0.910386	0	0.803778	2.00323	0.533618	0.458879	0.694785	0.748792	1.34518	0.839813	2.61376	2.56564	1.51155	1.48021	1.78689	1.66341	0.912146	0.475571	2.37717	1.2071
FBgn0032415	rho-6	-1.20958	0.0197955	Isolated Up	0.555141	0.166447	0	0.271121	0.380252	0.202308	0	0.365354	0.563409	0.123143	0.275327	0.422913	0.561594	0.4185	0.513219	1.49777	1.46214	0.633876	0.370052	0.606266	0.919251	0.912146	0.713356	0.895298	1.04965
FBgn0013773	Cyp6a22	-1.21122	0.00124808	Isolated Up	10.1781	4.4386	4.01258	13.9821	12.3371	1.82077	1.90707	3.87275	6.04099	7.10122	11.1508	9.18325	4.19858	6.51664	9.93779	21.5562	20.332	9.21557	12.2971	10.9766	14.8393	5.12411	6.85615	29.7301	16.8469
FBgn0026409	Mpcp2	-1.21145	3.26887e-34	Isolated Up	1172.48	867.246	780.685	1538.3	1460.67	631.201	724.177	1431.53	1366.89	765.987	699.378	1404.73	1067.24	753.449	663.546	1714.95	1740.22	836.472	705.831	1645.69	2008.61	890.711	917.773	1812.58	1711.66
FBgn0037387	CG1213	-1.21186	3.23946e-07	Isolated Up	142.094	89.0216	81.0636	220.886	191.267	55.6094	51.8631	62.5973	70.4261	132.05	149.916	210.671	199.339	95.7169	116.361	249.365	195.706	96.8367	84.8272	199.685	210.377	76.1642	96.6598	251.579	222.263
FBgn0023507	D2hgdh	-1.2119	1.9965e-08	Isolated Up	120.629	71.9053	75.1403	185.873	169.973	76.9023	83.6322	105.027	138.379	79.1396	99.5768	108.054	76.0826	75.6887	109.222	280.348	245.115	88.45	107.998	137.463	206.394	35.7078	49.0631	183.629	106.329
FBgn0031449	CG31689	-1.21426	4.81804e-08	Isolated Up	79.2382	50.1284	45.9058	137.962	112.428	36.9971	22.6988	79.9394	79.4719	55.6604	64.1513	77.9066	53.5119	67.4083	78.4759	155.915	156.007	51.929	75.9744	69.0506	89.999	33.1055	42.4447	143.464	121.182
FBgn0016013	Faa	-1.2147	6.82758e-12	Isolated Up	20.2261	10.0423	11.7511	23.5101	24.0826	13.1753	11.675	14.0783	16.4641	11.0007	16.8868	30.3289	26.4484	10.5821	13.9969	31.9525	25.2426	14.8229	21.6338	28.6541	34.9753	10.436	14.0293	37.1703	32.4866
FBgn0036910	Cyp305a1	-1.21577	0.000287649	Isolated Up	23.3901	12.8997	14.1396	36.9499	43.3065	3.23693	5.07003	11.2529	12.2698	27.7481	30.3319	21.9915	22.6242	17.5471	18.4292	59.3529	45.2159	13.5064	15.5137	26.0695	28.8907	9.14829	17.0809	37.1394	31.6469
FBgn0001083	fw	-1.2171	9.27524e-06	Isolated Up	17.4955	14.0093	8.93276	24.1685	25.8149	8.47165	3.62809	13.6155	13.0836	10.344	11.8391	16.1009	9.14595	12.3756	6.67185	26.4019	24.1391	16.6758	7.99881	39.6307	41.804	18.5112	17.3583	24.9757	24.1944
FBgn0027586	CG5867	-1.21865	3.01283e-05	Isolated Up	120.377	56.2592	82.3056	100.082	88.81	48.4022	80.9809	63.8638	71.6468	74.1728	78.1012	82.8909	79.5858	84.5369	122.706	363.665	290.883	80.3559	99.2023	170.999	192.736	52.5825	88.4958	240.928	194.867
FBgn0033702	CG8854	-1.2193	2.26609e-10	Isolated Up	6.06717	3.46765	4.44249	8.90827	9.21055	3.21164	2.09313	5.21238	6.5731	2.25761	3.25804	6.40411	8.74482	4.87253	6.76516	6.25541	6.34513	4.68093	5.00993	10.9128	10.7684	3.27299	4.31977	9.23083	9.39435
FBgn0038662	Mpc1	-1.22004	1.28216e-27	Isolated Up	71.857	55.0663	50.3483	92.8009	82.9372	43.0916	40.6532	70.1479	83.854	40.1445	44.0065	93.071	83.5705	42.5076	42.7372	102.642	99.0391	49.5886	47.6228	111.776	116.176	57.7603	51.4013	133.986	89.6399
FBgn0030027	CG1632	-1.22101	7.37538e-12	Isolated Up	41.6663	28.4625	23.5978	56.6256	60.5023	20.0032	27.7689	49.8343	52.3031	24.5054	20.466	52.2297	30.6202	29.8629	16.283	50.1314	54.375	38.2276	19.6981	78.5275	89.824	40.51	35.43	47.1421	53.0597
FBgn0027074	Ugt36F1	-1.22129	0.026192	Isolated Up	3.04178	1.60899	1.57637	6.77803	5.95728	0.252885	0	0.755065	1.34592	2.66809	1.37664	2.11456	3.07539	2.00282	1.86625	2.93681	1.68284	2.48674	3.07427	1.53162	2.8453	3.46079	3.56678	11.4845	8.55463
FBgn0027560	Tps1	-1.22361	0.0285229	Isolated Up	316.456	112.186	139.819	676.873	638.105	54.5726	55.1191	105.806	166.331	328.914	935.471	374.791	253.84	91.3824	263.188	520.197	444.048	166.465	232.364	285.488	521.04	36.9419	62.0224	709.323	420.646
FBgn0267298	lncRNA:CR45734	-1.22502	0.00481653	Isolated Up	0.573807	0.332895	0.812069	0.7359	0.633753	0.480481	0.744224	1.65627	1.00162	0.0410475	0.183552	0.211456	0.294168	0.119571	0.37325	0.910411	0.827625	0.682635	0.284655	0.925354	0.787929	0.402417	0.0396309	0.555702	0.734754
FBgn0037936	CG6908	-1.22525	0.000924158	Isolated Up	60.2528	23.6355	19.4897	54.5728	42.884	15.0214	15.8148	21.5802	23.6945	45.5627	60.8474	70.2639	54.8757	40.6244	44.9767	154.241	125.137	34.9607	37.2329	66.1788	66.1423	61.8381	73.2775	174.552	118.663
FBgn0052687	CG32687	-1.22664	5.30961e-10	Isolated Up	61.8432	47.4652	40.6512	134.941	100.682	27.7415	44.793	38.9467	51.7397	46.5068	62.4076	91.9533	59.8498	32.344	44.3235	88.7798	87.1765	41.2994	42.2428	68.54	87.6353	28.3302	27.7416	116.821	71.3236
FBgn0027108	Inx2	-1.22872	2.02975e-11	Isolated Up	85.7386	62.8894	65.7298	140.441	136.848	34.0383	40.6532	85.9556	57.3425	46.63	54.6066	108.991	88.6248	61.3401	42.0373	118.06	103.177	72.1643	52.8035	165.989	120.072	82.2809	53.6206	147.971	115.461
FBgn0031957	TwdlE	-1.23104	0.0277411	Isolated Up	1.14989	0.332895	0.0955375	0.0387316	0.211251	0.758655	1.30239	2.33826	2.50404	0.82095	1.69785	1.84269	1.76501	1.40496	0.653188	3.43607	2.75875	0.438837	0.370052	0.51054	0.56906	0.885318	0.198155	1.66711	0.997166
FBgn0035266	Gk2	-1.23171	1.3338e-11	Isolated Up	37.9089	26.1877	29.9988	61.5445	84.9229	28.7783	29.2573	28.1079	33.2098	21.8373	22.3933	34.0143	26.1542	18.6232	24.4012	70.1898	54.3198	22.3319	23.9395	42.8216	58.5256	22.6963	26.8698	63.844	54.8441
FBgn0034860	CG9812	-1.23198	6.18556e-06	Isolated Up	129.778	45.1905	54.6475	161.162	128.694	40.1834	57.2587	59.0168	65.8249	116.575	143.629	216.713	211.213	78.648	110.062	188.073	150.986	99.6647	120.494	240.688	242.77	64.1453	85.8802	219.811	213.341
FBgn0011283	Obp28a	-1.23263	0.00595671	Isolated Up	5.5345	4.27215	8.12069	13.4011	7.52054	1.71962	1.34891	2.75233	8.04422	5.25408	4.03814	1.1177	7.9158	4.81275	2.75272	13.0101	8.30384	1.65783	0.939362	2.64843	9.45515	0.938974	7.6884	12.5959	2.51916
FBgn0037410	Osi2	-1.23264	0.000437423	Isolated Up	3.11608	10.9855	9.21937	20.489	17.4071	0.354039	0	0.803778	0.751211	0.451523	0.596543	0.966658	1.47084	0.298928	0.466563	0.734203	0.910388	0.975193	0.455448	2.45697	1.18189	0.321934	0.713356	1.35838	1.41702
FBgn0267041	asRNA:CR45485	-1.23331	0.00589647	Isolated Up	0.273296	0.194189	0.0477688	0.193658	0.295752	0.101154	0.046514	0.146142	0.156502	0.369428	0.275327	0.483329	0.508109	0.20925	0.233281	0.264313	0.2207	0.341318	0.199259	0.51054	0.56906	0.107311	0.0396309	0.679192	0.367377
FBgn0039593	Sid	-1.2334	0.0479224	Isolated Up	2.51686	0.471601	0.668763	4.10555	3.08427	0.733366	0	0.365354	0.688611	2.66809	7.75506	4.28954	1.33713	0.657642	1.72628	2.7606	4.80023	1.51155	2.16338	2.26552	5.25286	0.724351	0.634095	9.16909	2.57164
FBgn0264834	lncRNA:CR44042	-1.23456	0.00438214	Isolated Up	0.891754	0.859978	0.38215	1.54926	1.39426	1.16327	0.093028	0.852492	0.970315	0.861998	0.0917758	1.69165	1.6313	0.119571	0.139969	0.792939	0.606925	0.780154	1.19555	1.02108	0.481512	0.912146	0.396309	1.94496	1.46951
FBgn0031418	CG3609	-1.2347	3.06914e-12	Isolated Up	70.1451	38.0887	44.0428	74.1323	93.4152	36.7948	58.7007	50.1265	77.4061	34.3157	58.0941	105.789	86.9133	39.2792	70.3577	132.245	106.433	49.491	54.853	91.0038	124.668	26.5595	38.0457	102.249	90.4797
FBgn0266709	Zmynd10	-1.23534	0.0238702	Isolated Up	0.382779	0.194189	0	0.154926	0.126751	0.151731	0	0.31664	0.250404	0.287333	0.550655	0.271872	0.561594	0.298928	0.326594	0.205577	0.4414	0.341318	0.512379	0.733901	1.0068	0.134139	0.158524	0.586575	1.57447
FBgn0039527	CG5639	-1.23589	1.98122e-09	Isolated Up	8.26417	6.65789	5.25456	10.7674	12.6751	3.79327	4.23277	7.84293	5.94709	7.92217	5.6901	13.0801	7.00655	6.78567	4.71229	13.1569	15.3111	4.04705	4.38369	13.0507	20.0484	5.87529	4.99349	6.23622	8.86953
FBgn0039023	Nepl14	-1.23648	0.00188172	Isolated Up	9.2787	3.68958	2.34067	13.3237	12.4638	4.07145	5.81425	5.77259	8.45113	12.5605	18.1716	9.002	4.51949	3.97575	6.99844	22.8778	19.7802	4.38837	7.48643	7.14756	11.5125	1.47553	1.62487	20.808	14.4327
FBgn0051380	CG31380	-1.23961	0.0315238	Isolated Up	1.0732	0.943202	0.477688	3.64077	1.43651	0.480481	0.744224	0.267926	0.0939014	0.944093	0.642431	1.20832	0.802277	0.508178	1.39969	3.08365	3.3105	1.07271	1.02476	0.829628	1.18189	0.160967	0.0396309	1.35838	0.104965
FBgn0004057	Zw	-1.23991	9.49546e-06	Isolated Up	32.6546	18.7808	17.1968	41.133	47.4892	10.9499	5.53517	15.3205	19.5315	24.0949	26.0643	35.1622	25.5926	24.0039	27.6205	68.1927	57.4648	27.6467	30.515	53.16	73.9778	17.3844	24.4523	49.4575	42.9831
FBgn0010053	Jheh1	-1.24005	0.0202654	Isolated Up	108.804	23.7465	26.7027	70.2979	65.6146	10.2418	12.8379	34.806	44.6658	106.395	205.257	100.412	89.4806	68.2752	88.6936	337.381	276.068	53.7331	78.4794	94.1308	110.179	80.242	92.1419	310.854	230.66
FBgn0261714	Cpn	-1.24053	1.21744e-08	Isolated Up	588.677	424.358	338.251	737.527	806.176	179.144	237.78	603.686	584.724	386.626	849.706	672.008	480.59	273.669	312.597	793.585	967.108	441.665	359.548	1260.4	1163.51	333.819	418.146	717.134	786.501
FBgn0015576	alpha-Est8	-1.24157	1.40098e-11	Isolated Up	54.9037	34.9817	33.056	74.171	76.4306	22.355	27.5828	38.9954	44.6345	34.6441	45.3831	56.8818	53.8328	43.6734	39.098	121.378	98.2667	32.4252	42.2713	76.9001	76.3854	35.3054	36.3812	97.1862	75.4697
FBgn0083956	CG34120	-1.24173	0.000122942	Isolated Up	82.1847	32.1243	26.2728	119.487	113.949	26.0471	22.0942	45.1577	31.4883	68.6725	79.845	81.5315	64.5833	68.2154	73.1571	234.152	173.884	72.9444	94.1354	120.424	127.426	35.3322	40.8198	130.158	90.5321
FBgn0037779	CG12811	-1.24211	1.2498e-09	Isolated Up	13.7206	7.65658	11.369	18.2813	18.0408	5.63933	7.39573	9.13385	12.6767	8.74312	7.93861	14.5905	11.2854	7.74224	12.6905	24.1993	22.5114	9.60565	12.5533	15.6034	20.4862	6.78744	8.91695	31.8294	23.6171
FBgn0032299	CG17127	-1.24279	0.00550587	Isolated Up	3.89992	0.970943	1.43306	1.16195	1.64776	2.55414	6.41893	5.43159	5.47758	5.37722	1.83552	10.5124	17.9175	1.73378	3.21928	3.08365	3.11739	3.16938	1.39481	5.04158	4.33361	1.39505	1.30782	2.43892	2.62412
FBgn0027580	PCB	-1.24511	2.43563e-09	Isolated Up	252.849	164.367	163.083	418.417	411.644	123.635	79.4459	169.354	195.878	161.85	186.213	224.204	167.301	161.72	186.019	439.552	434.862	185.872	222.373	333.766	438.045	141.195	190.427	487.876	381.285
FBgn0044047	Ilp6	-1.24644	2.02653e-13	Isolated Up	22.6062	18.3647	15.8115	48.1046	32.2369	12.8971	10.7912	24.1864	22.7867	14.4487	13.1698	29.181	25.0845	16.8895	20.5288	28.2228	36.3052	16.0419	20.0397	28.7498	23.025	7.56545	9.59068	38.5596	29.9675
FBgn0031460	CG15399	-1.24812	0.045545	Isolated Up	2.59794	3.24572	3.34381	8.36603	13.6046	1.03683	0	0.755065	0.876413	1.39562	2.24851	4.71246	5.26828	1.97293	3.77916	1.70335	1.71043	1.07271	0.853965	1.69116	1.92605	0.563384	0.87188	0.617447	0.734754
FBgn0038302	CG4210	-1.24849	1.91642e-05	Isolated Up	2.60357	1.22061	1.86298	2.82741	2.57726	0.606924	0.558168	1.51013	3.09875	1.10828	2.70739	3.80621	3.47653	1.19571	1.77294	4.11153	3.06221	1.75535	2.98888	3.12706	3.37059	2.03891	2.37785	6.39058	4.93335
FBgn0003731	Egfr	-1.24898	4.86633e-08	Isolated Up	49.4016	32.0689	24.8875	94.0403	96.246	15.7042	16.466	34.2945	30.5493	38.1331	41.7121	55.3714	46.6123	35.7518	39.8911	88.2512	81.6038	33.2541	48.5337	62.8283	74.0216	24.9767	32.2596	83.2319	54.9491
FBgn0013678	mt:Cyt-b	-1.25468	0.00256371	Isolated Up	1397.18	173.133	1309.2	2996.9	2700.25	133.27	1084.19	2065.13	617.402	98.2677	843.328	1753.79	1352.05	1264.77	779.627	2203.43	1833.13	1318.41	1333.67	2717.57	1171.26	1597.27	714.109	2478.37	993.702
FBgn0085489	CG34460	-1.25652	0.0454381	Isolated Up	0.257402	0.138706	0.0955375	0.154926	0.295752	0.050577	0	0.194855	0.0939014	0.738855	0.367103	0.634369	0.695306	0.269036	0.0466563	0.323049	0.137938	0.0975193	0.113862	0.287179	0.218869	0.0268278	0.0792618	0.277851	0.839718
FBgn0264750	CG44008	-1.25807	5.00631e-05	Isolated Up	6.7199	3.6341	4.96795	12.8589	14.4073	2.37712	3.86066	4.60346	5.50888	4.80256	6.92907	5.79995	5.26828	1.37507	6.39191	8.45801	9.51769	4.14457	8.71044	5.07349	8.14194	2.03891	2.85343	15.961	13.5929
FBgn0265856	lncRNA:CR44645	-1.25828	0.0124324	Isolated Up	1.25764	0.194189	0.238844	0.96829	0.802754	1.03683	0.279084	1.99727	3.47435	2.83228	2.89094	1.81248	2.40683	0.358714	0.37325	1.3803	0.937975	0.0975193	0.654707	1.34017	1.53208	0.402417	0.396309	1.72885	2.04681
FBgn0030160	CG9691	-1.25846	4.4668e-07	Isolated Up	225.262	117.651	153.338	244.668	232.292	67.4697	97.1212	127.874	241.546	141.08	196.217	250.969	185.968	111.739	249.984	466.982	453.676	194.356	198.632	250.26	388.055	78.7933	133.477	445.889	378.241
FBgn0030592	CG9514	-1.26026	0.0181357	Isolated Up	2.27038	1.22061	0.812069	1.08448	1.18301	0.202308	0	2.16777	1.43982	1.51876	1.83552	3.89684	2.11266	4.09532	1.58631	5.81489	4.16571	2.24294	1.48021	7.40283	5.82192	1.12677	1.22856	1.42013	0.629789
FBgn0036007	path	-1.26365	2.97386e-09	Isolated Up	178.898	108.69	122.575	435.15	328.495	72.4262	105.726	165.992	131.775	96.9952	129.863	173.334	113.014	115.028	119.767	301.699	297.724	112.586	136.634	189.442	168.967	135.427	118.893	369.203	244.148
FBgn0003965	v	-1.26366	0.00111933	Isolated Up	26.4614	11.0687	14.3784	37.9957	35.1522	7.33366	7.02361	10.0838	18.8429	14.4077	38.4082	25.0727	14.3608	15.1557	35.832	68.0753	58.7338	20.1377	28.921	25.8142	44.7369	4.34611	6.73725	58.1326	34.3235
FBgn0262563	CG43103	-1.26656	1.25599e-06	Isolated Up	14.02	5.79792	9.26714	20.489	24.4629	5.96808	8.41903	5.84566	9.67185	6.73179	7.66328	13.1707	15.6979	9.41624	15.9098	25.6384	23.808	10.8246	13.7204	12.8911	19.3918	5.55336	8.99622	31.4281	25.7164
FBgn0022702	Cht2	-1.26858	0.00691959	Isolated Up	9.08454	6.01985	3.63043	11.4258	12.8441	2.2001	4.04672	3.19076	1.72153	4.55627	17.5751	14.8019	11.4458	2.60068	3.96578	4.787	3.36568	11.9461	5.66464	37.4928	28.0153	2.73644	4.43866	9.32345	10.2341
FBgn0033170	sPLA2	-1.27057	0.00546677	Isolated Up	13.0908	13.3158	16.2891	29.01	26.4064	11.9109	12.9309	9.52356	18.0291	11.0418	11.7014	24.1362	16.206	2.00282	5.31882	8.36991	9.60045	1.17023	3.10274	2.13789	3.8521	5.31191	7.84692	34.577	30.3873
FBgn0031414	eys	-1.27238	5.76969e-14	Isolated Up	411.33	257.522	222.125	646.74	591.123	225.548	213.267	438.181	347.623	285.444	262.846	425.692	265.661	243.358	183.686	653.587	701.716	337.514	256.417	776.946	807.496	335.67	318.751	544.558	530.44
FBgn0030040	CG15347	-1.27707	0.016439	Isolated Up	5.65825	2.08059	2.10183	6.0034	6.84454	1.5426	0	2.02162	3.22395	3.03752	8.58104	6.40411	5.24154	2.21207	8.39813	8.7517	8.30384	2.24294	4.55448	2.10598	4.42116	3.32665	5.5087	22.5677	16.322
FBgn0030926	psh	-1.27776	5.08534e-05	Isolated Up	17.2979	6.04759	7.30862	26.2213	23.3221	7.10607	3.81415	8.62235	7.13651	18.3072	24.7336	22.5956	18.2652	9.56571	14.3235	32.9216	29.2979	10.2395	16.7662	23.0062	28.9345	6.06309	8.59991	35.6576	26.2937
FBgn0038115	CG7966	-1.28099	5.72805e-11	Isolated Up	19.4719	9.21009	12.7065	23.3939	26.4486	9.40732	19.3033	12.422	17.7787	13.1352	13.3993	26.6133	20.6453	12.2561	13.8103	41.967	33.574	10.7759	14.2043	20.7088	25.9141	9.30925	11.8496	41.3072	27.1859
FBgn0037144	CG7458	-1.28103	0.00140498	Isolated Up	1.7988	0.91546	1.14645	3.7957	2.87301	0.50577	0	0.998634	1.62762	1.55981	2.43206	1.29895	0.829019	1.37507	1.21306	3.14239	3.17256	1.07271	2.19184	3.25469	3.10794	0.670696	0.594464	3.2416	2.15178
FBgn0004797	mdy	-1.28164	1.54892e-06	Isolated Up	15.8277	9.51524	10.2703	33.8902	30.5892	5.86693	5.72122	9.88891	10.0475	9.97454	16.3361	14.1978	11.5528	9.92442	14.1835	28.5752	26.6219	10.8246	13.4073	15.7629	15.9337	6.78744	8.36212	39.6401	21.9901
FBgn0024920	Ts	-1.28219	0.0116277	Isolated Up	0.490257	0.693531	0.38215	0.813364	0.549253	0.83452	0	0.121785	0.313005	0.0410475	0.412991	0.453121	0.347653	0.0298928	0.37325	0.734203	0.6621	0.341318	0.25619	0.989171	0.700382	0.160967	0.237785	1.1114	1.2071
FBgn0259985	Mppe	-1.2823	1.19308e-14	Isolated Up	168.681	82.0585	90.9995	253.034	238.418	52.4483	66.0499	249.878	273.879	116.698	112.884	206.684	148.475	128.21	119.02	244.959	261.502	96.983	101.878	218.894	224.516	159.384	150.28	237.964	213.236
FBgn0037607	CG8036	-1.28289	0.00053807	Isolated Up	253.582	103.419	110.585	392.661	529.353	53.561	62.7474	99.8634	161.98	371.234	473.839	276.706	179.656	121.126	172.208	598.639	498.479	124.971	142.071	254.6	406.659	79.303	123.728	456.417	292.17
FBgn0037126	CG14567	-1.28553	8.10918e-05	Isolated Up	14.2923	5.5205	6.30548	17.4292	19.0126	8.39578	7.6283	6.01616	8.16942	5.99294	8.99403	8.12597	11.7667	8.72871	18.4759	25.4621	24.1667	12.3362	15.4852	13.0507	25.5639	4.31928	7.33172	42.8817	31.8568
FBgn0000370	crc	-1.28896	6.74661e-09	Isolated Up	146.928	66.4125	61.5739	253.769	224.053	82.6934	54.7005	180.046	105.107	105.205	86.1316	116.21	74.2641	102.413	112.535	311.008	310.828	94.2524	109.791	189.41	193.437	117.613	122.658	262.539	189.619
FBgn0038984	AdipoR	-1.29188	2.05852e-10	Isolated Up	206.516	132.52	120.95	381.855	358.535	93.7444	86.6091	160.122	134.874	121.172	162.489	199.675	162.14	139.869	162.271	410.184	395.108	124.532	154.482	237.976	257.478	137.493	133.834	396.71	291.75
FBgn0016715	Reg-2	-1.29213	4.65857e-06	Isolated Up	14.9853	5.49276	8.45507	24.4009	21.2096	5.7152	9.25629	6.55201	14.6799	9.76931	13.8581	19.1217	12.5957	8.60914	23.6547	27.2536	30.098	6.92387	10.76	17.1988	20.3111	4.61439	7.01467	33.6817	18.4213
FBgn0013676	mt:CoIII	-1.29467	2.841e-07	Isolated Up	1391.43	613.22	1146.35	3093.92	2537.84	624.373	1240.02	2131.55	785.861	286.635	908.122	1855.83	1554.28	945.062	682.768	2078.15	1893.8	883.037	956.327	2091.3	1136.59	1421.58	783.543	2537.95	1206.2
FBgn0031734	CG11147	-1.29563	8.2424e-08	Isolated Up	57.3791	25.9658	16.6713	90.6319	69.0369	27.7162	20.7452	44.5001	27.6696	48.2719	41.1615	71.5629	59.5557	45.9453	40.2644	136.004	102.046	40.373	57.9273	70.8055	83.9145	34.4469	37.0945	106.695	78.0938
FBgn0031702	fusl	-1.29565	6.44296e-09	Isolated Up	19.0674	10.3197	9.36268	26.3762	26.9979	8.87626	11.0703	15.1744	15.6815	11.5754	15.969	15.6478	14.2805	14.3486	15.6765	40.528	33.6292	13.6039	17.4494	23.9954	26.8771	7.48496	9.19437	47.2038	26.2937
FBgn0259233	CG42331	-1.29655	0.000196759	Isolated Up	6.32171	3.24572	2.05406	5.77101	4.85878	2.78173	1.58148	5.11495	4.47597	5.41827	4.12991	2.86977	2.05918	5.32092	4.66563	15.7413	13.5179	5.36356	7.65722	10.1789	16.8092	2.14623	3.48752	11.0832	11.3887
FBgn0259167	CG42272	-1.29695	0.000452907	Isolated Up	2.69658	1.05417	1.48083	2.55629	2.19701	0.151731	1.25588	2.36262	3.53695	2.91437	4.08402	6.79681	5.42874	1.04625	1.30638	2.14387	1.87595	2.09667	1.99259	4.97777	6.43476	1.52919	1.50597	2.31543	3.67377
FBgn0033365	CG8170	-1.30045	0.000155725	Isolated Up	3.16914	1.52577	0.955375	1.51053	1.69001	0.632212	3.48855	1.82677	1.72153	3.03752	1.83552	5.43745	4.27881	2.78003	1.58631	4.93384	4.99334	2.82806	1.5656	8.04101	7.13514	2.28037	1.42671	5.2483	5.30072
FBgn0029863	CG3823	-1.30098	7.36235e-08	Isolated Up	16.9109	6.82434	11.6078	23.084	24.0826	6.06924	6.79104	10.4978	14.1791	9.52302	10.7378	21.4779	20.2441	11.8077	8.77138	18.6487	16.2766	15.6031	14.5174	41.609	49.3769	10.4629	14.5842	19.6657	19.4185
FBgn0262570	CG43110	-1.30147	0.00835113	Isolated Up	2.0394	2.10833	1.48083	5.07384	5.07003	0.151731	0.279084	0.852492	1.00162	1.14933	1.46841	2.41664	2.62077	0.448393	0.37325	0.998516	0.6621	2.68178	1.05322	2.96751	2.58266	1.85112	2.45712	6.73017	2.46667
FBgn0010246	Myo61F	-1.30303	0.00174689	Isolated Up	3.56289	1.52577	1.00314	9.76036	10.9851	0.960963	2.23267	0.657637	0.62601	3.57113	2.24851	3.95726	5.37525	2.39143	3.21928	4.31711	2.45529	2.48674	2.96041	2.9037	3.0204	1.60967	2.97232	9.23083	5.03831
FBgn0033518	Prx2540-2	-1.3054	0.0359005	Isolated Up	11.8414	3.91151	2.67505	4.02809	3.76027	1.66904	0.046514	5.06624	3.84996	6.44446	26.615	22.656	17.0617	5.76932	11.0109	21.938	23.1735	5.75364	8.02727	33.1532	19.3043	5.39239	11.9685	22.4442	18.4738
FBgn0031645	CG3036	-1.30676	8.51437e-09	Isolated Up	120.937	123.421	108.674	278.287	195.999	55.3565	60.8403	99.7416	87.9543	49.257	67.0881	139.833	81.9659	72.7293	91.1197	221.347	232.038	75.5775	108.254	121.828	147.999	52.7972	49.8953	201.566	178.913
FBgn0267435	chp	-1.30742	1.14811e-09	Isolated Up	1330.69	802.748	591.807	2020.63	1852	354.621	509.282	1421.52	1238.59	1044.82	987.783	1429.29	930.133	864.291	657.154	2044.4	2008.54	862.168	678.532	2578.45	2564.67	1322.56	1288.84	1969.35	1914.3
FBgn0036824	CG3902	-1.30919	1.68738e-09	Isolated Up	163.865	77.6754	93.4835	173.208	186.197	81.6313	64.9335	108.705	169.273	72.9414	94.9421	216.229	172.222	110.962	179.673	349.862	318.994	122.679	166.324	208.364	286.456	72.4083	100.345	315.269	189.986
FBgn0265705	asRNA:CR44512	-1.30988	0.00499834	Isolated Up	0.274204	0.138706	0.0955375	0.23239	0.422502	0.0252885	0	0.219212	0.281704	0.082095	0.367103	0.634369	0.695306	0.328821	0.0933126	0.411153	0.193113	0.0975193	0.227724	0.414814	0.262643	0.24145	0.356678	0.339596	0.419859
FBgn0038819	Cpr92F	-1.31066	0.0349504	Isolated Up	3.31535	2.77412	3.43935	2.59502	0.464752	2.04837	1.81405	5.01753	0.532108	1.92923	3.0286	5.40724	3.47653	1.28539	1.07309	0.587362	0.8828	2.92558	1.13862	25.0484	9.76157	1.20725	2.10044	0.401341	0.629789
FBgn0016122	Acer	-1.3123	0.000160459	Isolated Up	67.9335	27.4916	28.9956	131.339	133.68	22.7344	23.35	30.3	29.2346	57.4255	95.1256	50.8704	32.8666	43.1354	61.353	125.431	118.599	34.4243	56.7887	56.2232	79.7997	23.8231	37.689	184.925	144.799
FBgn0032322	CG16743	-1.31396	1.60144e-05	Isolated Up	21.4444	26.5761	32.1484	44.3477	38.1942	19.9273	10.0935	24.4543	32.6151	6.60865	5.46066	21.5081	15.6711	6.03835	8.02488	15.0365	16.856	12.8725	15.5991	24.6017	28.4968	9.36291	9.7492	51.7421	38.6795
FBgn0083970	CG34134	-1.31554	0.000156492	Isolated Up	73.0928	37.0068	34.919	41.8301	33.1664	23.8723	21.2569	95.5522	116.5	88.2932	98.0625	108.115	106.221	25.9769	70.3577	74.2132	87.011	35.8383	34.244	46.5549	52.9664	30.691	51.322	203.665	236.591
FBgn0086367	t	-1.31596	5.98923e-07	Isolated Up	457.035	216.687	196.855	539.454	472.653	87.8522	122.657	552.853	537.805	196.33	311.579	438.228	259.804	420.144	371.337	816.257	859.102	275.151	315.768	695.068	778.474	432.76	451.158	792.216	828.645
FBgn0031184	CG14615	-1.31837	7.06662e-05	Isolated Up	5.00764	2.88509	2.91389	16.306	13.0131	3.84385	1.76753	4.33553	3.28655	1.724	3.12038	2.77914	1.76501	3.55725	4.24572	9.39779	8.11073	3.99829	4.83914	3.76523	4.6838	1.90478	2.85343	10.3114	4.7759
FBgn0031936	CG13794	-1.31853	1.38268e-09	Isolated Up	14.9778	7.76754	9.1716	30.0945	27.4204	8.16818	9.90748	14.2244	11.0491	7.92217	9.13169	14.1676	10.804	9.08742	11.3375	31.2477	24.8563	14.2378	13.5211	18.0604	17.3782	6.11674	6.26168	30.6871	16.8469
FBgn0036264	CG11529	-1.31861	0.00160079	Isolated Up	2.51202	1.80318	1.62414	6.81676	7.47829	1.99779	0.046514	2.16777	2.15973	0.98514	1.65196	2.35623	1.84524	1.61421	1.35303	4.31711	3.72431	2.82806	3.64358	1.11681	2.10115	0.402417	0.990773	3.11811	4.14611
FBgn0032783	CG10237	-1.31958	2.47497e-09	Isolated Up	70.6889	38.4216	28.2313	92.3361	73.7689	31.0543	29.1178	44.7193	45.1353	48.6002	48.6871	84.2805	64.3426	43.4343	57.2006	151.921	108.722	53.3918	52.9743	92.312	126.244	39.0077	61.7053	146.675	134.25
FBgn0051548	CG31548	-1.32081	7.21193e-11	Isolated Up	32.1071	16.5615	20.7316	37.5309	39.1237	16.1088	16.9311	20.1675	33.0846	17.9378	20.9708	34.407	29.5505	17.7862	33.6858	63.0533	62.1546	25.5501	24.8504	41.5452	66.2736	14.4602	15.3372	61.6212	41.1462
FBgn0027579	mino	-1.32082	1.20668e-05	Isolated Up	106.525	54.8167	51.3036	189.94	162.537	44.4572	36.56	58.0913	83.1028	118.258	150.512	100.442	59.5557	51.5054	80.4821	250.569	241.97	56.3174	80.472	117.775	142.484	31.9788	44.0299	223.115	126.325
FBgn0037896	ninaG	-1.32113	1.40798e-08	Isolated Up	57.4667	20.9446	25.413	62.048	62.3191	13.7822	32.6063	75.5065	87.6726	39.4877	44.6489	42.4121	37.1989	35.1241	59.6734	108.721	124.033	50.0762	41.5027	109.16	102.212	30.2618	32.854	67.8574	73.6853
FBgn0035383	CPT2	-1.32232	1.27988e-08	Isolated Up	16.5944	10.0146	11.99	28.7388	27.1669	5.96808	7.44224	9.6697	10.7674	13.2994	15.6478	18.0946	12.9701	9.80485	12.4106	32.0993	29.8221	9.94697	11.5855	20.4535	23.1564	6.73378	9.90773	37.3247	23.2497
FBgn0038946	rdhB	-1.32249	2.31215e-05	Isolated Up	112.364	38.588	75.9046	109.378	114.118	12.973	37.7229	87.5388	107.642	49.8727	78.606	139.017	105.366	72.6396	56.2675	146.253	133.993	71.9205	58.5535	216.022	218.081	149.458	129.831	247.874	239.11
FBgn0069973	CG40485	-1.32276	7.93021e-14	Isolated Up	107.413	75.04	89.7097	156.747	152.312	36.1878	60.5612	107.95	124.795	79.6322	71.8605	204.267	170.43	51.2662	43.7169	108.691	90.8456	86.7434	56.3617	190.336	187.221	78.0153	74.9024	145.224	135.09
FBgn0002937	ninaB	-1.32376	1.80464e-17	Isolated Up	108.29	65.5248	54.4564	111.818	128.61	37.0476	64.3754	136.423	110.272	75.4864	77.2752	116.331	105.713	70.6368	54.6812	180.438	168.201	79.7708	81.4967	151.12	198.383	70.6913	76.9632	185.45	197.806
FBgn0030617	CG9095	-1.32448	0.000107335	Isolated Up	4.41053	2.33026	1.00314	4.72526	3.33777	1.36558	2.6513	2.63055	1.18942	5.74665	1.69785	10.5426	9.62732	3.88607	2.47278	6.51972	6.70376	3.16938	2.10645	11.4552	5.82192	3.03154	3.80457	5.83488	4.19859
FBgn0025595	AkhR	-1.32475	0.00269481	Isolated Up	24.4258	11.6791	19.5852	71.3436	73.0929	2.78173	2.13964	8.23264	10.7674	12.068	34.4159	21.9008	14.6549	16.6204	28.4137	29.4562	27.5323	10.337	24.6227	18.539	29.5036	8.37028	11.2948	53.9958	44.8725
FBgn0001226	Hsp27	-1.32912	0.017047	Isolated Up	17.0509	9.68169	10.3658	5.30623	4.85878	4.80481	4.69791	4.50603	5.00808	14.9823	11.9767	43.6808	24.202	7.26396	9.75116	8.13497	6.89688	27.3054	13.4642	16.6245	21.0115	7.24351	6.97504	45.9072	94.5733
FBgn0030798	CG13003	-1.33066	6.33343e-09	Isolated Up	9.7224	7.32368	4.53803	17.0419	14.7031	5.46231	3.30249	9.62098	5.44628	7.51169	5.27711	7.85409	6.76587	6.78567	4.71229	13.9205	12.6075	5.26604	5.80696	18.5709	13.1759	8.20931	8.32249	22.6912	18.4213
FBgn0027657	glob1	-1.336	1.17589e-07	Isolated Up	144.888	87.6623	92.337	141.835	136.299	67.0145	59.7705	82.4238	115.593	84.3526	95.4927	171.763	154.625	84.6565	112.395	215.474	194.244	79.8683	88.8693	148.44	181.092	111.496	120.399	509.085	342.133
FBgn0036992	Hpd	-1.33632	5.35895e-16	Isolated Up	182.715	85.3875	86.4137	305.476	289.203	183.519	110.471	222.939	246.147	93.4652	118.574	218.072	201.666	73.925	140.949	271.068	232.535	151.057	169.199	199.43	249.599	61.1674	93.3308	337.003	244.568
FBgn0025454	Cyp6g1	-1.33711	0.0264699	Isolated Up	1790.7	547.029	558.13	2542.34	2208.33	298.252	284.666	409.781	740.695	2991.54	3926.12	1344.05	845.947	572.567	1234.2	4796.63	4347.29	714.231	1003.58	1754.41	3168.79	502.244	713.277	4628.48	2844.18
FBgn0034162	CG6426	-1.33739	6.34872e-05	Isolated Up	53.2898	38.0055	52.1635	89.9735	92.4012	13.2512	12.4192	17.9267	30.831	18.4303	42.997	44.6777	38.5895	27.3519	50.2022	87.9281	80.5555	43.7374	56.6748	62.6369	92.2315	16.204	25.879	139.08	104.807
FBgn0083978	CG17672	-1.34048	0.0160466	Isolated Up	0.244558	0.0832237	0.286613	0.0774632	0.126751	0.227596	0	0.194855	0.438207	0	0	0.211456	0.133713	0.179357	0.0466563	0.352417	0.33105	0.0975193	0.25619	0.701993	0.612834	0.268278	0.317047	0.401341	0.524824
FBgn0036875	CG9449	-1.34141	0.000122839	Isolated Up	22.2868	9.21009	10.5091	36.0979	39.7997	6.04395	7.58178	8.37878	12.9584	11.2881	24.963	11.5093	13.4782	13.7208	17.1229	56.8567	47.754	19.2601	28.1809	21.0917	38.6523	6.54599	10.8192	42.9126	40.149
FBgn0035091	CG3829	-1.34342	0.000907714	Isolated Up	43.1144	41.0293	30.0943	95.1248	82.6837	7.76357	1.76753	23.5531	25.1656	38.3794	71.9064	46.3694	29.0692	18.8624	28.3204	78.5891	77.1347	21.8443	32.1091	55.9999	49.8146	10.1946	18.5076	93.2036	57.2583
FBgn0031850	Tsp	-1.34471	6.37393e-15	Isolated Up	83.7621	46.6053	46.7656	119.177	122.441	32.5969	31.1179	77.114	75.9976	61.6533	61.6734	102.647	92.3153	58.5003	44.5568	130.336	107.895	50.6613	41.0757	125.497	147.693	68.5183	75.8139	146.52	143.12
FBgn0063923	Kaz1-ORFB	-1.34691	1.23721e-07	Isolated Up	16.36	9.76491	8.64614	31.7212	23.7869	8.47165	11.2564	9.54791	11.7064	7.63484	15.7396	18.3665	11.8737	7.41342	15.2566	26.2551	31.367	11.6536	13.6634	14.8695	23.5503	4.31928	7.76766	37.726	30.2823
FBgn0259164	CG42269	-1.35057	0.00173157	Isolated Up	2.89792	1.10965	0.716531	2.3239	2.91527	0.32875	2.13964	1.63191	0.939014	2.66809	6.01132	4.8937	3.50327	1.16582	0.513219	4.08217	3.14498	1.70659	0.910896	6.63702	5.20909	1.69015	2.45712	7.13151	5.72058
FBgn0028425	JhI-21	-1.35167	7.72229e-15	Isolated Up	40.284	22.082	20.254	45.161	39.166	22.9114	19.0242	58.5053	44.1337	30.9088	31.938	57.3651	40.515	17.9058	35.5054	70.7478	85.9075	34.083	32.3653	63.0836	57.1249	14.809	16.209	53.8414	53.2696
FBgn0052191	CG32191	-1.35206	0.0400656	Isolated Up	10.9713	2.77412	3.43935	16.9257	15.5903	1.03683	0.23257	2.8254	3.56825	13.3404	21.8885	7.06868	5.10783	6.87535	14.0902	39.9994	38.1259	5.5586	8.65351	15.1886	19.7858	1.28774	1.54561	11.4228	6.98016
FBgn0004654	Pgd	-1.35382	3.64493e-09	Isolated Up	86.5481	43.6092	48.2942	107.209	141.58	31.5095	37.7229	52.3187	68.235	46.9173	76.1739	94.521	67.204	54.3751	74.2768	197.677	161.083	67.4834	68.4026	126.231	184.726	33.1055	56.4344	135.777	102.288
FBgn0002573	sens	-1.35775	0.000252159	Isolated Up	0.537302	0.610307	0.0477688	0.774632	0.718254	0.32875	0	0.487138	0.532108	0.861998	0.321215	0.513537	0.615079	0.388607	0.186625	1.02788	0.744863	0.390077	0.0853965	0.893445	1.22567	0.295106	0.43594	0.833554	0.577306
FBgn0039486	CAH9	-1.35852	0.00716493	Isolated Up	8.23302	2.02511	2.38844	7.90125	9.54855	1.49202	3.30249	3.06897	2.69184	15.0234	11.5179	31.3258	40.5952	7.20417	6.62519	6.34351	5.93131	2.82806	4.18443	4.78631	8.22948	2.46816	2.81379	7.68722	7.60995
FBgn0023535	arg	-1.35862	9.51718e-06	Isolated Up	4.39984	3.77281	4.29919	7.93998	12.3371	2.68058	2.74433	1.70498	3.94386	2.13447	3.53337	6.28328	3.71722	1.58432	2.14619	2.58439	2.45529	2.87682	1.7364	8.743	10.7684	1.6365	3.36863	6.88454	5.72058
FBgn0034511	GNBP-like3	-1.35935	0.0275764	Isolated Up	14.2305	2.02511	4.20365	4.84145	4.35177	3.84385	2.18616	6.74687	12.0194	3.73532	9.45291	14.2582	6.04382	4.30457	9.33126	5.49184	10.4833	21.3567	28.2093	25.6865	102.65	6.97523	7.80729	27.6308	17.8965
FBgn0259715	CG42369	-1.36052	0.00651669	Isolated Up	128.701	40.3635	50.4916	337.12	344.466	32.0152	37.9554	52.7571	97.2506	183.77	296.436	121.859	92.8769	39.5482	97.8849	237.206	232.066	47.0531	75.2628	56.4466	120.028	15.5065	31.8236	264.36	184.266
FBgn0035290	dsb	-1.36164	0.00102501	Isolated Up	30.396	6.63015	6.78316	16.306	22.3081	6.47385	3.67461	18.292	22.0355	18.2251	43.3182	37.6392	29.0959	26.0666	36.2053	72.4805	61.8512	20.089	31.1128	32.1002	40.7097	10.3555	14.7823	96.9701	55.9987
FBgn0036436	CG4914	-1.36656	0.017234	Isolated Up	2.37511	0.388377	0.38215	0.193658	0.169001	0.708078	1.20936	0.657637	1.09552	1.10828	1.78963	1.8729	1.01622	1.73378	2.5661	6.63719	6.28995	1.02395	1.53714	3.47805	3.0204	2.68278	2.21933	8.24292	6.98016
FBgn0033439	CG1773	-1.36747	0.0132227	Isolated Up	2.25046	1.30384	2.14959	5.65481	4.81653	0.455193	0	0.901206	1.43982	2.13447	4.03814	1.60103	0.962732	0.508178	1.39969	1.49777	1.7656	1.36527	2.50496	5.16922	6.47853	0.295106	0.277416	4.353	2.93901
FBgn0036985	zye	-1.36945	2.44245e-05	Isolated Up	2.04696	1.30384	1.5286	1.78165	1.35201	0.733366	0.325598	3.45868	1.97193	0.98514	0.917758	5.01454	5.66942	0.956571	1.16641	1.3803	2.17941	1.85287	1.5656	4.56295	3.45813	1.69015	2.02118	1.72885	1.52199
FBgn0027611	LManII	-1.37006	0.000187825	Isolated Up	140.892	55.8153	57.9913	160.31	152.861	40.5122	36.6995	100.083	129.114	166.366	205.807	97.6929	70.0655	76.705	124.899	493.649	466.698	64.8503	94.1924	110.404	167.041	47.6462	60.2786	250.313	151.412
FBgn0031746	CG9029	-1.37016	0.00671443	Isolated Up	0.406162	0.249671	0.286613	0.387316	0.0845004	0.303462	0	0.511495	0.970315	0.082095	0	0.211456	0.160455	0.448393	0.559875	0.61673	0.579338	0.341318	0.227724	0.446723	1.09435	0.295106	0.118893	0.617447	1.15461
FBgn0030482	CG1673	-1.37114	3.58811e-05	Isolated Up	43.8722	25.5774	25.5563	120.029	35.9127	46.8849	43.4906	27.913	34.9313	15.0644	12.3438	75.9431	27.946	18.2944	36.4852	38.6191	53.0508	35.497	39.8517	37.3652	42.3293	13.1725	12.246	141.272	93.1563
FBgn0288229	CG3164	-1.37318	1.33859e-08	Isolated Up	166.584	88.9661	87.7034	312.022	286.963	57.0003	59.8635	117.961	96.3116	111.239	147.208	160.737	108.655	114.161	117.014	360.112	290.331	107.076	136.008	228.945	209.108	89.7659	102.129	374.451	234.281
FBgn0042129	OS9	-1.37521	0.0175976	Isolated Up	3.74434	1.49803	9.9359	13.3624	8.45004	1.13798	0	1.26656	3.88126	3.32485	1.8814	1.84269	5.93685	3.07896	1.30638	7.04835	5.98649	0.682635	1.50867	1.37208	3.89587	0.509729	2.65527	7.77983	1.52199
FBgn0001114	Glt	-1.37602	0.0180351	Isolated Up	245.107	67.8828	60.6185	322.286	346.283	38.6155	19.4429	84.1532	130.241	475.33	646.148	251.361	215.812	68.335	138.336	557.554	446.035	84.598	108.425	288.168	475.297	30.7715	56.3155	600.035	370.526
FBgn0063497	GstE3	-1.37626	0.000231866	Isolated Up	46.9751	17.0886	20.1584	40.0872	41.532	7.66241	7.3027	14.9064	21.9416	29.3079	36.3432	54.6464	52.8968	39.7276	57.2006	125.343	113.109	33.9367	40.1079	52.8409	56.9498	22.0256	32.9333	110.214	99.1393
FBgn0042201	Nplp3	-1.37814	0.00832533	Isolated Up	397.471	200.264	203.734	263.685	142.045	109.98	149.31	245.542	48.4531	258.476	282.853	682.672	521.212	137.477	135.21	294.445	248.315	637.142	122.601	2279.94	1233.85	236.38	405.741	382.447	317.519
FBgn0268063	ltl	-1.37823	4.85955e-09	Isolated Up	78.1175	44.4414	46.0968	151.518	136.679	26.907	25.3501	65.4958	58.3441	43.1409	53.6889	55.7037	49.8214	73.7456	61.1664	169.66	130.434	52.5629	59.2936	131.049	128.87	40.8856	40.1065	137.228	92.6314
FBgn0263006	SERCA	-1.38044	2.02653e-13	Isolated Up	1237.42	927.14	780.494	1919.77	1525.57	552.098	799.762	1252.34	1105.35	761.965	729.526	1538.98	1501.01	686.549	417.014	1309.88	1457.64	963.978	656.585	2929.16	3390.46	834.077	870.889	1471.65	1316.31
FBgn0013279	Hsp70Bc	-1.38203	0.00293152	Isolated Up	10.1338	4.1057	5.49341	3.13726	5.02778	7.66241	10.6052	3.70225	6.5418	7.30646	7.89272	41.0527	23.3997	5.38071	8.63141	5.16879	4.24848	5.41232	4.18443	4.85013	7.61665	2.09257	6.45984	21.1476	42.0909
FBgn0033204	CG2065	-1.38602	0.00023319	Isolated Up	17.1902	5.29857	7.02201	10.1477	10.3091	2.22539	3.02341	7.4045	9.76575	16.9937	15.7396	18.6988	20.1639	13.2724	13.3904	48.428	41.4364	11.7998	13.0372	20.5811	25.6515	11.2945	11.8496	37.6643	37.3675
FBgn0053963	lncRNA:CR33963	-1.38694	0.00619011	Isolated Up	0.253021	0.610307	0.0955375	0.774632	0.633753	0.050577	0	0.462781	0.187803	0.123143	0.137664	0.543745	0.267426	0.0896785	0.139969	0.176209	0.33105	0.146279	0.199259	0.191453	0.218869	0.107311	0.118893	0.308724	0.157447
FBgn0062412	Ctr1B	-1.38707	0.00056598	Isolated Up	4.3107	2.33026	3.20051	6.0034	7.14029	1.11269	0	1.60756	2.28493	2.62704	4.35935	5.2562	5.00086	1.64411	3.82582	8.95727	7.2831	3.46194	4.29829	5.67976	8.44835	2.28037	2.25896	9.19996	5.19576
FBgn0036698	CG7724	-1.38957	1.11056e-05	Isolated Up	18.2075	5.68695	4.92018	19.0559	17.9986	7.0302	12.4192	6.52765	7.32431	10.6724	12.298	20.6925	16.928	10.4326	13.0638	42.7012	32.8567	17.846	18.7018	23.421	37.7331	8.102	11.2552	43.4683	35.8455
FBgn0086450	su(r)	-1.39089	7.37993e-13	Isolated Up	44.7302	36.5629	39.9824	89.2763	81.1627	29.2082	38.095	47.5934	50.7068	19.8259	26.4773	45.0704	37.9209	16.74	27.8071	60.7332	54.2646	26.2815	32.3937	56.4466	76.9982	13.0652	19.0625	93.111	54.7391
FBgn0015569	alpha-Est10	-1.39273	0.000341181	Isolated Up	13.1652	3.74507	2.19736	14.0208	14.2806	2.75645	3.02341	6.35716	7.07391	7.59379	12.3897	13.0801	10.804	11.0902	13.8103	50.0139	37.8225	9.70317	14.6597	13.306	16.2839	6.43868	7.88655	22.7221	14.905
FBgn0017482	T3dh	-1.39356	6.63107e-09	Isolated Up	7.07794	3.74507	4.49026	11.5807	13.4356	3.26222	6.79104	4.5791	6.3227	3.2838	3.67103	7.55201	5.66942	4.54371	5.59875	15.5945	13.8489	4.97348	6.12008	10.0832	9.23628	2.22671	2.6949	13.9543	6.61278
FBgn0031542	CG15414	-1.39418	0.0218838	Isolated Up	4.07298	3.49539	3.53489	3.52458	3.21102	0.227596	0	1.68063	0.469507	1.19038	7.15851	3.29268	2.35334	1.16582	2.75272	11.3361	11.2281	1.70659	2.30571	13.7208	12.0378	1.4487	4.31977	2.80938	2.78157
FBgn0284245	eEF1alpha1	-1.39689	5.23635e-08	Isolated Up	3172.06	1284.86	1419.78	6757.46	7222.08	1300.13	1590.73	1643.43	2250.5	2193.87	3223.58	2976.67	2789.94	1591.05	2822.19	5703.79	5035.6	2023.43	2697.68	3083.76	4327	1197.86	1623.8	6778.98	4591.16
FBgn0033602	Cpr47Ee	-1.39725	0.000151461	Isolated Up	13.6496	8.35011	6.25771	22.3869	22.0969	1.315	2.27919	4.70089	4.06906	16.6242	16.8409	24.4081	22.8649	7.0846	9.00466	23.8469	19.2837	6.77759	8.1696	23.7082	27.4024	7.99469	8.24323	18.3999	15.4823
FBgn0028494	CG6424	-1.40098	0.00449835	Isolated Up	1.17995	0.721272	0.334381	3.75697	2.57726	0.404616	0	0.925563	0.719911	0.861998	0.825982	0.634369	0.962732	0.747321	0.606532	2.90744	2.56564	0.146279	0.797034	0.701993	0.393965	1.82429	1.1493	2.28455	1.46951
FBgn0053970	osy	-1.40274	6.12998e-09	Isolated Up	23.5164	14.2035	12.6587	53.256	40.9827	10.3936	11.489	15.3449	11.8316	16.9526	18.1716	24.0154	14.7886	15.0959	12.9238	54.331	34.374	17.3584	19.1858	30.6643	36.4198	10.0873	11.2948	46.5555	32.0143
FBgn0035921	CG13305	-1.40346	2.39249e-07	Isolated Up	19.7748	14.9248	15.5248	16.7321	15.3368	3.84385	12.6518	31.2256	37.4041	7.10122	7.2044	26.3112	15.8851	21.5228	10.9176	32.2168	29.491	16.432	14.1189	45.8529	48.9392	8.96049	7.52987	15.8375	18.6313
FBgn0286507	vrs	-1.40362	0.010615	Isolated Up	0.365806	0.471601	0.334381	0.774632	0.676004	0.50577	0	0.243569	0.156502	0.123143	0.367103	0.604161	0.695306	0.149464	0	0.293681	0.717275	0.146279	0.313121	0.159544	0.0875477	0.134139	0.118893	1.23489	0.472342
FBgn0039094	CG10184	-1.409	2.25576e-16	Isolated Up	27.2083	15.5351	21.5437	35.207	28.0119	12.796	13.8612	42.5759	67.1708	10.385	18.5387	40.9923	31.1551	19.3706	22.9549	48.1637	41.2157	17.1146	19.015	31.1749	37.558	11.0531	12.2856	31.3354	23.9845
FBgn0022774	Oat	-1.40916	1.35562e-12	Isolated Up	38.047	22.9975	29.1867	57.0516	58.2631	12.1385	21.536	27.5964	36.559	14.9823	33.6358	54.5557	36.5838	18.2047	27.7605	61.4674	53.2991	25.6963	28.0101	46.5868	69.9944	16.3381	23.0652	83.5097	54.1094
FBgn0038181	CG9297	-1.41095	1.02977e-10	Isolated Up	246.178	186.06	161.124	576.094	492.131	96.1216	138.519	220.065	151.463	144.159	126.788	299.966	351.344	169.941	89.0669	224.901	252.122	188.164	124.195	469.633	560.305	190.853	146.04	293.318	255.904
FBgn0053458	CG33458	-1.41296	0.0317127	Isolated Up	0.273928	0.0832237	0.0477688	0.116195	0	0.0252885	0	0.292283	0.219103	0.205238	0.0917758	0.271872	0.21394	0.448393	0.139969	0.411153	0.413813	0.146279	0.142328	0.382905	0.131322	0.160967	0.475571	1.42013	0.734754
FBgn0264679	asRNA:CR43964	-1.4133	3.19277e-05	Isolated Up	0.480285	0.44386	0.716531	0.348584	0.464752	0.101154	0	0.535852	0.62601	0.205238	0.183552	0.694785	0.668564	0.298928	0.326594	1.05725	0.579338	0.243798	0.398517	0.670084	1.05057	0.295106	0.237785	0.802681	0.577306
FBgn0014863	Mlp84B	-1.41451	5.43629e-12	Isolated Up	213.988	147.611	136.714	411.252	422.587	83.1486	97.3073	175.126	152.621	96.2974	105.175	308.122	326.928	130.034	105.63	175.386	194.961	175.242	123.085	375.183	453.628	154.26	177.665	293.997	313.74
FBgn0265737	lncRNA:CR44544	-1.42218	0.0041347	Isolated Up	0.247933	0.0554825	0.0477688	0.271121	0.464752	0.126442	0	0.438425	0.125202	0.451523	0.183552	0.271872	0.454623	0.0597857	0.0466563	0.117472	0.275875	0.146279	0.170793	0.446723	0.131322	0.24145	0.237785	0.555702	0.629789
FBgn0263200	Galt	-1.42594	1.16915e-09	Isolated Up	62.2212	41.3344	47.5777	84.1638	94.9785	34.4176	38.0019	28.6194	41.6922	32.5507	43.1346	65.1588	49.0993	26.9036	45.2099	118.177	95.3976	41.6895	43.723	82.3884	132.591	21.4623	29.8817	155.072	100.084
FBgn0037974	CG12224	-1.42737	0.0422833	Isolated Up	9.32104	0.388377	0.0955375	0.271121	0.422502	3.00933	1.62799	9.35306	17.3405	3.03752	6.4702	11.5999	7.7286	6.72589	12.0373	24.3168	22.1252	10.4833	11.3862	11.1042	16.0212	4.13148	6.65799	22.4133	14.9575
FBgn0260746	Ect3	-1.42836	9.32202e-06	Isolated Up	33.8948	35.3701	23.5022	74.2097	68.3186	11.2787	9.90748	33.783	34.7122	19.3334	61.3521	21.5988	16.5002	14.5279	15.6765	61.1444	47.1195	11.7998	15.2006	48.9161	58.657	11.2677	11.2948	68.0118	39.9916
FBgn0026268	Antdh	-1.42887	0.0108021	Isolated Up	35.8456	4.27215	6.01886	18.0489	14.8298	4.19789	3.48855	6.5033	11.5812	13.2583	29.047	52.1391	55.2501	41.5809	44.1368	98.5594	78.6796	25.8426	43.6092	55.4255	95.5146	12.6896	26.6716	64.8937	54.0569
FBgn0001248	Idh	-1.42902	1.17884e-13	Isolated Up	255.655	156.239	159.93	337.972	350.297	112.66	133.914	191.299	205.394	156.801	160.516	286.493	225.119	139.39	192.084	627.802	538.618	144.231	171.903	276.394	359.734	127.298	171.404	542.736	367.482
FBgn0034329	BomS1	-1.42916	2.3212e-05	Isolated Up	61.1961	17.7266	49.1063	90.9418	88.4297	17.4996	37.9554	24.1377	35.7764	12.4374	26.3855	52.1089	48.2436	29.9526	46.9829	52.8626	64.5823	58.6091	57.5288	104.916	182.625	35.1444	44.4262	179.801	110.528
FBgn0010387	Acbp2	-1.42992	2.09588e-13	Isolated Up	60.7655	25.6606	48.0554	83.3504	96.2038	25.8196	31.676	36.0482	67.2647	43.3872	49.0542	104.671	93.2513	27.9498	54.8211	121.261	101.108	34.0342	31.0843	58.7121	91.7938	25.0035	37.5701	92.3392	78.2513
FBgn0032864	CG2493	-1.43257	4.63259e-07	Isolated Up	40.2757	15.0635	16.8146	59.5692	59.7841	14.1363	8.04692	25.9645	33.022	36.286	41.8957	41.1434	29.2029	26.6046	38.818	93.1556	87.7283	18.8212	25.2774	38.3224	58.4381	19.5843	25.1656	94.6238	59.1477
FBgn0000052	Pfas	-1.43461	9.40435e-07	Isolated Up	89.1324	49.8787	40.9856	182.271	105.245	46.1009	33.9087	41.1632	51.5832	75.2401	104.487	175.358	60.7858	37.6949	66.3919	181.759	168.146	53.8307	61.5994	85.0687	109.216	31.6568	35.7867	246.763	94.2584
FBgn0032668	CG17681	-1.43812	0.00782883	Isolated Up	0.417135	0.305153	0	0.387316	0.507003	0.177019	0	0.560209	0.219103	0.16419	0.550655	0.966658	0.962732	0.239143	0.37325	0.881043	0.827625	0.926433	0.199259	0.542449	0.393965	0.0536556	0.0396309	0.52483	0.20993
FBgn0032494	CG5945	-1.4464	2.25806e-06	Isolated Up	156.017	38.0332	51.9246	179.753	184.76	39.6524	65.0266	79.6958	108.487	125.646	155.881	180.584	168.692	92.6977	131.291	373.885	293.255	129.701	167.605	219.532	333.951	44.6147	58.3367	283.964	237.43
FBgn0037553	CG18249	-1.45254	0.00278452	Isolated Up	7.66059	2.38575	2.57951	13.2849	14.4496	0.556347	1.86056	2.63055	3.81866	10.344	18.2634	6.34369	3.10214	2.03271	3.7325	17.5915	16.9663	2.82806	4.92453	8.26437	11.9503	2.17305	2.14007	19.6657	11.966
FBgn0263390	Nha2	-1.45447	9.87089e-22	Isolated Up	21.1375	11.7345	9.60152	31.7986	33.6312	11.7591	5.11654	24.4543	21.7538	11.9859	15.9231	35.3132	27.8123	12.5251	14.79	34.0083	32.0015	14.6767	16.3961	30.2814	29.9851	11.992	12.3252	32.1381	25.2965
FBgn0288810	CG46525	-1.4576	0.000153083	Isolated Up	0.77546	0.249671	0.955375	1.39434	1.47876	0.556347	0.418626	1.5832	1.31462	0.082095	0.321215	0.876034	1.04296	0.807107	0.139969	0.499258	0.827625	0.487597	0.654707	0.446723	2.27624	0.107311	0.634095	0.617447	0.839718
FBgn0033820	CG4716	-1.46181	0.000155725	Isolated Up	532.727	144.781	263.158	996.138	808.754	247.549	269.502	198.631	389.847	540.431	724.341	524.472	324.895	184.678	574.945	1161.01	1153.21	243.701	366.493	295.252	584.687	67.8207	124.005	1494.28	1102.87
FBgn0034356	Pepck2	-1.46428	0.0318799	Isolated Up	8.32172	3.07928	3.8215	6.04213	4.98553	5.46231	9.25629	10.303	15.7128	0.697808	2.11084	3.17185	1.39061	8.7586	18.3826	45.0507	36.0845	1.95039	1.13862	1.88262	2.40756	1.26091	2.10044	8.58252	6.08796
FBgn0000276	CecA1	-1.46483	0.0368291	Isolated Up	2.11895	0.138706	1.05091	7.08788	0.0422502	2.35183	2.55827	2.33826	1.65893	0.697808	0.137664	5.37703	4.11835	0.538071	1.8196	0.675466	0.717275	1.75535	1.96412	2.36125	11.1186	1.42187	0.317047	0.555702	0.0524824
FBgn0032495	CG16820	-1.46567	4.76881e-06	Isolated Up	7.44519	2.13607	3.67819	6.6231	6.59103	1.89664	1.39542	4.18939	2.94224	4.59732	3.85458	12.8384	11.1249	6.12803	6.76516	11.248	9.68321	5.5586	4.49755	22.2723	12.782	5.12411	6.34095	13.2442	13.1731
FBgn0037165	CG11437	-1.47017	0.00551548	Isolated Up	0.39554	0.138706	0	0.309853	0.253501	0.0252885	0.325598	0.170498	0.125202	0.697808	0.183552	0.664577	0.374396	0.119571	0.466563	1.14536	0.937975	0.195039	0.341586	0.414814	0.656608	0.160967	0.158524	1.04966	0.577306
FBgn0259992	CG42489	-1.47225	7.91338e-07	Isolated Up	1.67032	1.66447	1.67191	4.06682	4.22502	0.657501	0.976794	2.38698	1.97193	0.98514	0.596543	0.966658	1.04296	0.597857	0.419907	3.28923	1.21385	0.731395	0.882431	2.13789	2.36379	1.26091	1.1493	3.14898	1.67944
FBgn0031432	Cyp309a1	-1.47304	0.0487059	Isolated Up	24.0179	4.68827	6.49655	28.9712	28.6034	0.960963	2.6513	13.5912	24.79	43.9208	86.8199	37.0351	15.8316	2.83982	9.23795	68.1927	50.8714	3.65697	2.78962	12.4763	28.453	1.23408	1.90228	69.0306	31.3845
FBgn0038960	CG13855	-1.47446	0.015684	Isolated Up	0.141851	0.194189	0	0.116195	0.211251	0	0	0.292283	0.062601	0.082095	0	0.302081	0.320911	0.149464	0.0933126	0.176209	0.303463	0.195039	0.113862	0.127635	0.350191	0.107311	0.0396309	0.0617447	0.104965
FBgn0034943	Fmo-1	-1.47511	0.000165121	Isolated Up	13.3678	10.4584	9.84036	19.7531	19.3084	2.52885	1.30239	2.43569	3.22395	6.77284	12.7568	13.4728	12.7295	5.88889	11.1975	29.0157	27.6703	7.94782	11.3862	23.5487	30.3353	5.60702	7.5695	27.9704	18.1064
FBgn0261976	Psf2	-1.47574	1.60656e-06	Isolated Up	3.63941	1.69221	2.43621	8.55968	9.21055	1.77019	1.39542	1.97291	2.75444	1.02619	3.34982	4.07809	2.86145	1.52453	3.3126	6.13793	4.8554	2.7793	3.81438	3.57378	5.73438	1.47553	0.752987	7.50198	4.7759
FBgn0015575	alpha-Est7	-1.48095	1.11849e-10	Isolated Up	125.222	54.4005	62.6726	220.693	194.098	49.0091	42.7929	73.5335	97.3445	92.6442	99.8062	136.299	107.746	77.0338	110.155	256.384	252.067	70.9453	92.1713	158.395	180.874	49.7656	69.473	284.52	172.51
FBgn0032285	CG17108	-1.48313	0.00250941	Isolated Up	1113.3	656.108	401.21	937.227	862.073	447.707	104.936	936.938	465.25	462.154	412.257	1425.49	514.259	1190.18	1196.97	4337.76	2178.25	1301.98	876.453	924.78	1358.92	419.963	296.954	3738.83	1272.49
FBgn0264952	lncRNA:CR44121	-1.48437	0.00748863	Isolated Up	0.192115	0.194189	0.238844	0.426048	0.295752	0.101154	0	0.584566	0.500808	0.205238	0.137664	0.0906242	0.160455	0.0896785	0.0933126	0.323049	0.248288	0.0487597	0	0.159544	0.393965	0.107311	0.118893	0.0926171	0
FBgn0039313	CG11892	-1.48504	3.70042e-05	Isolated Up	1.53179	1.13739	1.24199	3.71823	2.74626	0.429904	0	0.94992	1.34592	1.6419	0.688319	1.99373	1.28364	0.538071	0.746501	1.43904	1.79319	1.46279	1.50867	2.42507	2.40756	0.778007	0.43594	2.902	3.14894
FBgn0031561	IM33	-1.48628	9.71405e-08	Isolated Up	121.513	35.2868	54.4086	227.045	191.393	37.3511	95.8188	93.3601	107.924	38.6667	83.6996	158.29	84.7472	75.8979	149.86	257.47	251.35	74.9923	105.123	103.48	192.911	34.0445	53.7395	237.1	172.352
FBgn0044810	TotX	-1.48682	0.0103356	Isolated Up	3.43599	0.0554825	0.238844	1.82039	1.69001	0.531058	1.20936	1.82677	1.87803	4.43313	5.87365	2.44685	1.6313	0.956571	1.8196	6.0792	8.46936	2.19418	4.0421	2.93561	5.25286	1.39505	1.07003	14.6952	9.91917
FBgn0039151	CG13607	-1.4886	0.0113137	Isolated Up	50.6572	11.0133	15.6204	87.456	114.921	2.09894	2.0001	15.7589	21.6912	46.8352	93.4737	39.935	26.3949	32.4636	54.4012	111.804	102.736	18.4311	51.4087	48.5013	81.5945	7.72641	13.8312	121.575	94.101
FBgn0032834	CG13965	-1.49348	0.00113817	Isolated Up	1.37293	0.471601	0.525456	1.74292	1.60551	0.455193	0	0.365354	0.813812	0.779903	1.42253	0.634369	1.79175	0.567964	1.25972	2.46692	1.79319	1.85287	1.25248	2.1698	4.15852	0.402417	0.515202	4.01341	1.88937
FBgn0261514	NimA	-1.49739	0.0165126	Isolated Up	1.20444	1.44254	0.525456	2.09151	1.35201	0.126442	0	0.194855	0	0.533618	1.23897	1.69165	0.561594	0.508178	0.326594	1.11599	1.46214	1.02395	0.683172	4.97777	3.15172	1.36822	0.396309	1.66711	2.46667
FBgn0085350	inaF-C	-1.49766	0.000225789	Isolated Up	1.57082	0.638048	0.573225	3.64077	5.07003	0.354039	0.558168	1.5832	1.37722	1.06724	1.00953	0.483329	0.187198	1.22561	0.653188	2.99555	2.26218	1.07271	0.740103	2.45697	3.72078	0.804835	2.02118	1.42013	1.7844
FBgn0034624	CG17974	-1.49826	0.00104922	Isolated Up	1.36982	0.249671	0.716531	0.619706	0.211251	0.303462	1.02331	0.706351	0.594709	1.06724	0.412991	1.44999	2.72774	0.896785	0.513219	2.49629	1.51731	1.95039	1.13862	5.20113	3.41436	0.590212	0.554833	1.7906	2.72909
FBgn0267762	asRNA:CR46093	-1.49866	0.0263183	Isolated Up	1.30731	0.749013	1.00314	0.658437	0.887255	0.859809	0.418626	0.438425	0.406906	0.205238	0.412991	0.966658	0.695306	0.0597857	0.37325	0.557994	0.413813	0.195039	1.19555	0.574358	0.700382	1.95843	1.58524	7.34762	8.71208
FBgn0038105	yellow-f2	-1.5013	0.000177421	Isolated Up	21.251	6.7966	7.97738	24.3622	23.2799	3.31279	2.51176	8.96335	15.2433	22.4119	37.3528	28.6977	16.6071	10.612	17.8694	52.099	49.823	9.16682	13.7204	21.315	27.7526	5.66067	8.83769	55.2924	40.359
FBgn0034628	Acox57D-p	-1.50349	3.98947e-07	Isolated Up	21.9624	10.2088	9.45821	22.5805	22.7729	6.6003	10.6982	17.878	18.5299	14.9002	20.4201	19.7561	11.7935	15.0959	16.4697	76.7095	68.1963	11.7998	17.3924	26.6438	27.0085	7.35082	10.304	40.0723	24.4568
FBgn0034454	CG15120	-1.50535	0.0386972	Isolated Up	1.06837	0.499342	0.573225	0.658437	0.295752	0.202308	0	0.803778	1.37722	0.0410475	0.367103	0.392705	0.347653	0.687535	1.11975	6.98961	4.77264	1.36527	2.07798	0.223361	1.0068	0.0804835	0.317047	0.864426	0.577306
FBgn0043535	Obp57a	-1.5067	3.05531e-11	Isolated Up	12.177	3.1625	3.15274	17.1968	17.4493	10.4441	8.13995	21.4584	22.3172	8.94836	7.84683	11.5999	16.0188	4.1551	3.63919	14.8603	11.1454	8.3379	7.77108	10.7213	16.6341	7.21668	10.7003	24.2965	25.0341
FBgn0012036	Aldh	-1.50893	6.79938e-15	Isolated Up	401.095	215.965	250.882	570.788	658.174	115.164	146.38	304.218	404.621	237.337	371.876	481.486	420.259	212.329	280.638	751.031	670.183	195.916	233.417	480.929	716.972	212.02	270.441	806.756	618.505
FBgn0030348	CG10352	-1.50998	1.8797e-06	Isolated Up	6.60451	2.44123	2.62728	9.02446	7.30929	1.36558	3.06992	3.36126	2.72314	2.66809	3.25804	6.31348	4.33229	4.33446	4.19907	13.8911	12.1661	6.43627	6.57553	16.433	15.4084	3.78272	4.16125	12.812	9.81421
FBgn0039298	to	-1.51085	0.00325455	Isolated Up	18.2871	3.10702	6.44878	26.0276	15.4636	3.48981	3.67461	4.45732	7.76252	8.2916	8.07627	13.7145	10.1622	23.9143	24.2613	82.172	54.6233	9.65441	21.0645	12.4125	23.4628	4.88266	8.08471	36.1824	27.5008
FBgn0031775	CG9150	-1.51201	0.00026341	Isolated Up	28.8031	6.18629	7.40416	13.7497	16.5198	3.91972	7.02361	24.6248	27.0749	22.6172	19.3647	43.4694	31.3155	5.97857	34.3857	37.5618	43.3676	44.6151	28.6078	74.6984	85.9719	8.39711	7.33172	47.3891	49.7008
FBgn0031220	CG4822	-1.51292	0.0171705	Isolated Up	17.2918	16.6447	18.2954	76.3013	60.5446	4.70366	3.53506	9.86455	10.4857	16.5421	26.0643	19.3029	18.3989	2.33164	4.29238	5.05131	4.11054	1.85287	3.98517	3.2866	3.23927	9.09463	11.6119	52.977	32.4866
FBgn0039483	CG14259	-1.51396	3.55404e-08	Isolated Up	17.3411	10.403	8.02515	29.2036	27.4626	5.03241	6.23288	8.45185	9.73445	13.7509	21.0167	22.505	18.5861	5.8291	5.59875	32.1874	22.7321	12.775	11.8417	32.1002	33.881	7.51179	10.6211	36.0898	24.6142
FBgn0003388	shd	-1.51527	0.00969529	Isolated Up	0.797968	0.471601	0.668763	1.39434	1.09851	0.126442	0	0.170498	0.594709	0	0.321215	0.302081	0.10697	0.687535	0.279938	2.55503	2.31735	0.633876	0.939362	1.27635	1.22567	0.724351	0.515202	1.48187	1.25958
FBgn0036428	Gbs-70E	-1.51568	8.24843e-09	Isolated Up	81.7615	48.8246	46.0968	188.391	211.927	24.9092	22.6988	57.3362	43.8833	36.6554	62.4993	92.6481	87.5551	61.6988	63.4526	153.948	129.192	46.2729	49.7862	75.7514	80.4563	52.6362	42.2069	176.281	107.169
FBgn0035969	CG4476	-1.52491	0.0034693	Isolated Up	2.84349	0.44386	0.859838	4.91891	4.22502	0.151731	0	0.876849	0.688611	1.31352	1.42253	3.26247	2.91494	4.03553	2.09953	6.78403	5.21404	2.73054	2.24877	5.74358	6.74117	2.33402	1.42671	4.29126	3.51632
FBgn0063493	GstE7	-1.52983	0.0403518	Isolated Up	9.16819	2.52445	4.15588	8.48222	9.71755	0.0252885	0	0.852492	1.09552	3.3659	5.41477	9.39471	9.11921	9.38635	8.72473	29.0451	25.0219	5.8024	8.34039	8.392	10.3744	6.54599	7.72803	23.2778	23.2497
FBgn0026403	Ndg	-1.53085	0.00094399	Isolated Up	11.1502	4.4386	3.53489	17.6616	16.4353	5.41174	3.90718	4.89574	2.84834	8.25055	7.34207	17.8228	17.3024	2.27186	1.493	8.72233	2.45529	4.09581	2.16338	20.4535	24.6885	15.587	17.1602	34.2066	24.4568
FBgn0039152	Root	-1.53129	6.74937e-05	Isolated Up	8.37428	2.91283	3.77373	23.239	28.2231	2.30125	1.90707	3.3369	2.25363	5.50037	6.24076	5.2562	4.97412	5.64975	6.25194	10.2788	9.2694	4.68093	10.6461	10.1151	19.5669	2.46816	4.24051	13.306	14.5901
FBgn0265346	lncRNA:CR44300	-1.53182	0.0141174	Isolated Up	0.195341	0.0277412	0.143306	0.23239	0.422502	0.0758655	0	0.511495	0.406906	0.082095	0.275327	0.392705	0.0534851	0.239143	0	0.0881043	0.137938	0.243798	0	0.638175	0.218869	0.0804835	0.158524	0.154362	0.104965
FBgn0036656	CG13026	-1.53267	1.3793e-08	Isolated Up	2.58177	2.27478	1.81521	3.7957	3.92927	0.809232	3.02341	3.5074	3.19265	1.80609	0.87187	6.22286	5.69616	1.58432	1.30638	3.43607	3.17256	0.975193	1.05322	2.13789	2.18869	1.52919	0.515202	3.02549	4.09363
FBgn0010222	Nmdmc	-1.53453	5.88152e-08	Isolated Up	72.9467	24.8561	29.2822	107.596	25.9416	40.8662	44.6069	115.281	162.074	32.879	47.3104	126.451	66.589	29.9227	73.9502	92.1865	117.771	55.391	53.1736	48.597	59.2698	25.3255	35.7867	235.371	100.241
FBgn0065047	snoRNA:U3:54Ab	-1.53486	0.0448482	Isolated Up	0.13728	0	0.191075	0.271121	0.0845004	0.151731	0	0.0974277	0.563409	0	0	0.0302081	0.267426	0.179357	0.0933126	0.205577	0.11035	0	0	0.0638175	0.131322	0.160967	0.118893	0.154362	0.419859
FBgn0043533	Obp56f	-1.53493	0.0102066	Isolated Up	0.588273	0.360636	0.38215	1.66546	1.43651	0.126442	0	0.292283	0.281704	0	0.825982	1.44999	1.04296	0.567964	0.793157	0.411153	0.468988	0.243798	0.0284655	1.69116	0.787929	0.214623	0.43594	0.401341	0.20993
FBgn0267240	lncRNA:CR45680	-1.53808	0.0437212	Isolated Up	0.733026	0.721272	0.477688	1.74292	1.81676	0.101154	0	0.121785	0.219103	0.369428	0.137664	0.332289	0.481366	1.19571	1.58631	2.6725	2.62081	0	0.113862	0.446723	0.393965	0.24145	0	0.802681	0.997166
FBgn0085237	CG34208	-1.53869	0.00744146	Isolated Up	1.34339	0.388377	0.7643	1.35561	2.66176	1.11269	0	2.33826	1.15812	0.246285	0.917758	1.1177	1.55107	2.80993	0.419907	1.82082	0.358638	0.292558	0	1.4678	3.72078	0.509729	1.54561	2.902	2.78157
FBgn0023479	teq	-1.53921	1.2215e-06	Isolated Up	149.79	91.9622	95.5853	339.444	327.27	40.057	24.1873	89.9745	82.1012	88.9499	119.905	117.389	76.6709	93.4151	98.7247	300.671	286.441	60.462	105.322	124.093	175.664	81.7176	111.561	416.468	246.93
FBgn0020633	Mcm7	-1.54228	0.00472218	Isolated Up	0.799096	0.693531	0.429919	1.31687	0.971755	0	0	0.340997	0.250404	0.205238	1.1472	0.573953	0.267426	0.239143	0.513219	1.52714	1.13109	0.438837	0.483914	1.43589	2.14492	0.37559	0.832249	1.75972	2.0993
FBgn0262983	CG43291	-1.54334	0.0225518	Isolated Up	0.467381	0.0832237	0.238844	0.697169	0.845004	0	0	0.0730708	0.0939014	0.082095	1.10131	0.845826	1.65804	0.358714	0.279938	0.323049	0.303463	0.0975193	0.113862	0.542449	0.525286	0.509729	0.277416	1.32751	0.839718
FBgn0035982	CG4461	-1.54427	5.10982e-18	Isolated Up	58.6561	25.4942	36.352	92.4136	81.2049	19.4469	40.7928	70.3915	103.072	13.792	26.202	59.9932	85.175	36.6785	37.7916	71.247	91.5905	47.2481	33.9024	69.944	125.106	33.3202	40.1857	77.7057	88.6953
FBgn0262686	CG43156	-1.54662	0.00813746	Isolated Up	0.183545	0	0.0477688	0.271121	0.169001	0.0758655	0	0.0730708	0.438207	0	0.137664	0.0604161	0.374396	0.20925	0.139969	0.352417	0.165525	0.292558	0.0853965	0.223361	0.218869	0.187795	0.0396309	0.370468	0.472342
FBgn0058298	CG40298	-1.54772	1.04395e-05	Isolated Up	2.47695	0.804496	2.00629	5.38369	5.36578	1.21385	0.790738	1.87548	0.406906	1.35457	1.10131	4.28954	5.66942	1.55443	0.839813	1.67398	1.65525	1.60907	1.7364	6.44557	4.15852	2.17305	1.42671	3.55032	2.36171
FBgn0037807	CG6293	-1.5536	1.67925e-10	Isolated Up	12.3085	7.21272	6.30548	25.6791	21.2519	3.05991	4.3258	8.33007	6.94871	9.03045	7.47973	18.3363	11.1516	6.96503	4.61897	17.4447	13.8765	8.87426	8.1696	16.2735	23.2877	8.88001	7.37135	27.7542	22.7774
FBgn0029823	Shmt	-1.55557	7.97887e-07	Isolated Up	146.386	62.5287	66.1597	254.931	113.146	58.1382	55.5842	63.1819	121.008	85.1736	153.679	223.177	113.281	64.8674	159.005	334.503	319.518	90.2541	102.647	148.982	226.705	34.3396	51.1635	462.406	148.893
FBgn0032262	CG7384	-1.55651	0.0013907	Isolated Up	4.14759	2.05285	1.71968	8.63715	9.12605	0.632212	0	1.31527	2.06583	5.54141	6.4702	4.04788	2.80797	1.64411	2.5661	5.22752	6.04166	2.38922	2.24877	4.97777	7.74797	0.778007	1.78339	10.0644	9.65676
FBgn0031646	snsl	-1.55726	0.000170758	Isolated Up	3.51208	1.58125	2.05406	3.83443	4.09827	1.06212	0.093028	1.5832	0.970315	2.70914	1.69785	2.71872	1.49758	1.79357	1.72628	7.34203	6.53824	3.36442	2.22031	7.17947	5.6906	2.33402	2.85343	9.84828	9.49932
FBgn0037146	P5CS	-1.55813	0.000836015	Isolated Up	305.754	109.966	148.179	702.94	561.505	37.3511	37.9089	132.623	215.472	215.951	511.467	262.87	160.402	153.799	305.132	729.005	684.97	133.601	252.29	254.568	489.917	50.8387	77.954	677.401	431.983
FBgn0053777	CG33777	-1.55887	5.2216e-06	Isolated Up	0.639943	0.166447	0.38215	0.852095	1.09851	0.278173	0	1.2422	1.18942	0.49257	0.22944	0.724993	1.47084	0.597857	0.279938	0.851675	0.937975	0.731395	0.483914	1.21253	0.481512	0.456073	0.158524	0.463085	0.577306
FBgn0050090	CG30090	-1.56302	0.00605203	Isolated Up	1.34843	0.194189	0.38215	0.658437	0.718254	0.531058	0	0.779421	1.34592	0.82095	3.48748	3.50413	3.42305	0.328821	1.63297	1.99703	2.26218	0.243798	0.910896	0.797719	2.53888	0.187795	0.356678	3.05636	2.20426
FBgn0030828	CG5162	-1.56382	6.36617e-05	Isolated Up	40.8197	15.2299	20.2062	61.9706	76.7264	7.08078	6.51196	11.8618	12.9897	47.2046	57.5893	55.8849	62.8183	19.3407	29.4868	97.7958	80.6383	16.627	24.2526	37.8438	33.3557	13.6017	16.7242	98.5137	75.4172
FBgn0085453	Mthfs	-1.56789	4.79601e-10	Isolated Up	21.3417	9.23783	13.8052	37.1436	42.377	7.6877	14.4659	12.5682	25.5099	6.97808	18.4469	30.5101	18.5593	7.59278	20.4355	32.4224	34.7327	16.5295	14.2612	23.3891	38.127	5.15094	7.21283	43.2522	31.8043
FBgn0031538	CG3246	-1.57029	0.00296016	Isolated Up	60.5226	19.0027	24.9353	125.568	127.046	10.0648	4.977	22.4571	43.9772	62.3922	134.727	43.56	30.7807	17.1286	47.2162	123.757	121.854	22.4294	36.0943	38.801	76.6042	6.89475	15.6146	170.23	126.43
FBgn0052115	CG32115	-1.57081	4.3161e-06	Isolated Up	1.10615	0.638048	1.24199	2.71121	3.42227	0.758655	0.883766	1.0717	0.751211	0.65676	0.963646	1.99373	1.01622	0.328821	0.326594	1.46841	1.37938	0.536356	0.284655	0.893445	0.656608	0.429245	0.396309	2.53153	1.2071
FBgn0039325	CG10560	-1.57255	0.0263183	Isolated Up	15.7047	1.55351	1.81521	5.1513	4.39402	5.56347	5.95379	11.1798	9.98485	3.57113	1.74374	9.12283	11.847	22.7484	24.2146	87.0177	70.7344	14.6279	19.2427	28.0797	22.9813	1.28774	1.30782	7.5946	5.19576
FBgn0035978	UGP	-1.57348	5.24266e-17	Isolated Up	141.869	91.8235	89.2798	297.071	274.669	63.0948	59.3519	101.252	110.084	56.8508	82.2311	180.614	132.269	76.0175	92.1462	219.027	193.775	89.474	95.6726	205.173	253.976	70.1816	75.6158	316.936	178.283
FBgn0265938	lncRNA:CR44725	-1.57368	0.00141825	Isolated Up	0.417352	0.471601	0.525456	1.78165	1.01401	0.303462	0	0.243569	0.438207	0.246285	0.321215	0.724993	0.374396	0.149464	0.139969	0.323049	0.496575	0.341318	0.113862	0.159544	0.306417	0.134139	0.0396309	0.895298	0.472342
FBgn0038958	CG13857	-1.5792	0.00371093	Isolated Up	0.223678	0.0277412	0.143306	0.23239	0.0422502	0.101154	0	0.194855	0.500808	0.123143	0.0917758	0.362497	0.187198	0.179357	0	0.293681	0.386225	0.292558	0.227724	0.829628	0.437739	0.214623	0.0396309	0.0926171	0.367377
FBgn0053784	CG33784	-1.58169	3.84836e-06	Isolated Up	0.644711	0.0554825	0.620994	0.890827	0.633753	0.531058	0.325598	1.29092	1.22072	0.287333	0.642431	0.93645	0.802277	0.179357	0.0933126	0.939779	0.524163	0.487597	0.0853965	1.11681	0.875477	0.509729	0.475571	1.26577	0.682271
FBgn0025583	BomS2	-1.58688	1.69815e-05	Isolated Up	95.0353	23.6355	46.0491	113.948	66.0371	31.56	45.0256	33.1254	51.6145	17.9378	57.8188	76.3055	57.7639	37.7546	99.0513	133.126	186.298	66.0206	102.134	142.185	244.521	36.9151	61.2694	328.173	222.578
FBgn0030895	CG7135	-1.58981	2.08659e-08	Isolated Up	35.0378	9.1546	14.2829	53.2172	59.6996	10.5453	13.5821	45.45	36.9972	14.4898	16.5196	23.5623	17.7303	28.6373	20.7154	61.4674	48.6092	9.41061	22.4308	38.4181	74.6344	33.6689	34.36	74.495	78.8286
FBgn0050026	CG30026	-1.5903	0.00018075	Isolated Up	8.54763	4.38311	5.58894	14.7955	8.57679	3.46452	0.372112	1.70498	2.31624	6.77284	7.34207	10.1197	7.22049	2.54089	6.99844	16.3287	18.6492	5.94868	7.57182	7.17947	17.2031	3.19251	2.45712	27.569	16.8469
FBgn0052251	Claspin	-1.59124	0.000224303	Isolated Up	1.08804	0.804496	0.238844	1.588	1.52101	0.354039	0	0.389711	1.22072	0.32838	1.37664	1.35936	0.561594	0.239143	0.419907	2.7606	1.95871	1.21899	0.939362	2.9037	2.18869	0.429245	0.792618	1.57449	0.944683
FBgn0032836	CG10680	-1.59346	0.00129142	Isolated Up	99.703	29.4612	37.1641	136.645	139.299	19.2951	23.3965	31.323	34.3992	55.9477	107.607	69.5692	51.0248	55.511	102.504	342.931	353.506	64.9479	124.622	138.803	214.973	12.1262	20.1325	144.236	83.447
FBgn0003867	tsl	-1.59481	1.0341e-11	Isolated Up	35.8618	18.0873	23.0723	45.0449	48.3765	7.28309	8.9772	26.7195	36.5903	15.4339	30.1025	49.2089	37.6803	22.7186	26.9207	75.0061	72.1689	22.3807	26.9568	49.2033	61.94	16.8747	15.6938	72.1796	52.0625
FBgn0031805	Nepl4	-1.59896	0.0143926	Isolated Up	26.0304	5.43728	3.53489	18.2813	15.7593	2.98404	3.67461	20.0214	17.2466	40.596	54.469	11.5093	5.61594	6.2476	13.5303	16.8867	26.4288	13.799	16.7377	22.9743	38.6961	3.0852	6.73725	134.048	126.43
FBgn0034151	CG15617	-1.60103	0.0301606	Isolated Up	0.187551	0.0554825	0.0955375	0.193658	0.0845004	0.126442	0	0.121785	0	0.32838	0.0458879	0.634369	0.267426	0.0597857	0.0933126	0.0881043	0.0827625	0.146279	0.113862	0.287179	0	0.0268278	0.158524	0.493958	0.997166
FBgn0013278	Hsp70Bb	-1.60312	0.0216733	Isolated Up	1.96409	0.499342	1.43306	0.619706	0.253501	0.32875	0	0.31664	0.062601	1.14933	2.34028	8.15617	3.10214	0.926678	2.42613	1.05725	1.46214	1.36527	1.59407	3.22278	3.10794	0.107311	0.832249	5.74226	7.03264
FBgn0000477	DNaseII	-1.60399	3.91898e-06	Isolated Up	31.2086	19.4189	22.2125	55.9672	59.0236	4.57722	7.11664	16.4166	19.5628	14.4898	35.6549	20.8738	16.206	16.8297	23.2348	76.6508	62.9271	17.7485	21.8615	32.7703	85.0088	9.22877	10.5418	63.9984	36.6852
FBgn0041711	yellow-e	-1.60506	1.02672e-05	Isolated Up	12.1806	8.57204	5.20679	11.7744	9.8443	1.5426	2.55827	6.23537	5.35238	4.30999	15.2348	13.2915	10.0819	4.93232	5.08554	31.5707	25.684	6.09496	8.71044	32.7703	24.776	5.2046	11.8893	23.9261	17.6866
FBgn0027562	CG10345	-1.60674	2.01309e-05	Isolated Up	25.6581	7.96173	7.78631	69.4845	64.2626	3.05991	7.76784	11.5452	12.1133	11.0828	31.938	18.88	13.0504	16.5008	17.9627	62.1723	50.292	17.0171	23.8826	29.1965	40.0093	7.45814	13.7123	38.93	39.7292
FBgn0034330	BomS4	-1.61033	0.000362585	Isolated Up	11.4892	3.71732	17.4356	33.5416	29.3217	0.910386	1.81405	4.18939	3.81866	1.55981	8.90226	13.352	17.0617	2.86971	8.49144	9.63274	10.5384	7.70403	9.39362	9.41308	15.1895	5.17777	6.65799	26.0254	29.0228
FBgn0033728	Cpr49Ae	-1.61576	9.2374e-12	Isolated Up	34.4013	24.6619	19.7285	50.3511	45.757	11.2534	8.23298	27.0362	32.3021	9.9335	16.795	53.9516	47.8692	15.2453	11.5708	40.0875	36.2224	26.7203	24.6227	82.0374	75.7725	28.2765	25.2053	53.0078	58.9902
FBgn0023477	Taldo	-1.6172	5.76885e-15	Isolated Up	173.589	62.1958	101.747	233.668	343.114	53.1058	75.6783	102.811	198.132	80.7815	132.57	250.697	184.952	88.8415	137.776	345.34	293.834	119.461	111.499	222.819	293.547	66.0769	95.2727	342.282	229.925
FBgn0033867	Cpr50Ca	-1.62008	0.0182199	Isolated Up	0.936931	0.91546	0.477688	0.96829	0.929505	0.556347	0	0.146142	0.0313005	0.287333	0.22944	0.181248	0	0.597857	0.279938	1.87956	1.43455	0.731395	0.398517	3.15897	2.40756	0.885318	0.673725	2.902	2.41419
FBgn0000277	CecA2	-1.62466	0.01628	Isolated Up	1.68467	0.0832237	0.812069	6.66184	0.211251	1.13798	0	1.63191	0.688611	0.410475	0.458879	2.50727	2.35334	0.388607	2.00622	1.52714	0.689688	1.07271	2.10645	2.5527	10.1555	1.87795	0.317047	0.308724	0.472342
FBgn0040653	Dso1	-1.626	3.08373e-05	Isolated Up	126.347	23.8297	43.2307	158.838	119.948	43.825	62.8869	49.4202	62.7575	22.9045	65.5279	121.98	89.3469	55.4811	145.801	224.225	263.571	112.976	163.591	194.899	466.542	23.7158	49.4197	273.313	194.29
FBgn0037973	CG18547	-1.6269	4.14803e-08	Isolated Up	16.5982	6.26952	11.2734	17.1968	14.8298	4.14731	2.46524	16.3191	42.0365	6.6497	10.0036	28.607	13.8526	8.7586	19.6423	41.4678	32.5533	10.7759	12.6102	13.5612	22.0182	4.50707	9.70957	30.471	18.6313
FBgn0033366	Ance-4	-1.62728	0.00417949	Isolated Up	30.8149	7.51787	7.35639	73.6675	58.6011	3.0852	5.81425	6.99044	13.2088	44.3313	68.8319	28.5164	20.9394	7.74224	16.3764	64.9035	69.4377	10.6296	19.2996	27.8563	52.835	3.89003	3.96309	83.5097	40.254
FBgn0030451	CG15717	-1.62815	0.00132693	Isolated Up	0.359071	0.0554825	0.525456	1.20068	1.30976	0.126442	0.23257	0.292283	0.125202	0.287333	0.183552	0.332289	0.240683	0.0896785	0.279938	0.646098	0.496575	0.195039	0.284655	0.478631	0.437739	0.0268278	0.0792618	0.586575	0.104965
FBgn0051427	CR31427	-1.62851	0.0309865	Isolated Up	0.33206	0.0554825	0.0955375	0.852095	0.464752	0.0758655	0	0.414068	0.250404	0.123143	0.87187	0.573953	0.722049	0.328821	0.37325	0.881043	1.15868	0	0.170793	0.223361	0.218869	0.0536556	0	0.0617447	0
FBgn0036262	CG6910	-1.62916	1.27988e-08	Isolated Up	274.115	128.553	166.379	484.881	344.72	101.053	97.2608	254.968	358.39	93.4241	148.585	342.106	222.07	169.761	258.616	500.609	533.487	172.755	254.966	132.294	215.236	84.9637	96.422	950.838	466.411
FBgn0020637	Lcp65Ag2	-1.62995	0.00379633	Isolated Up	0.719148	0.610307	0.668763	1.51053	0.887255	0.101154	0	0.121785	0.0313005	0.246285	0.0917758	0.573953	1.20341	0.20925	0.466563	0.939779	0.717275	0.926433	0.540845	1.72307	2.53888	0.295106	0.475571	0.64832	1.73192
FBgn0038147	CCHa2	-1.63396	5.22288e-15	Isolated Up	42.2576	22.7755	28.6135	39.5062	38.7435	19.0422	12.2332	54.8274	61.7558	19.5797	37.6281	67.8775	55.2501	20.1478	29.4868	71.6288	61.0236	20.4303	24.2811	48.1184	45.6999	20.255	18.0321	129.386	67.8597
FBgn0033464	CG1441	-1.63404	9.4114e-09	Isolated Up	24.9363	9.34879	13.3275	38.3443	38.3209	7.61184	4.88397	13.8104	15.2433	12.8889	12.5274	29.4529	19.2012	14.5877	19.8756	58.4425	46.7608	21.308	23.3132	27.5692	41.7603	8.98732	11.9685	56.5582	52.3774
FBgn0035344	Cyp4d20	-1.64703	9.73255e-08	Isolated Up	13.8552	6.01985	6.35324	28.5065	28.9414	2.88289	2.60478	7.13658	8.76413	12.3143	17.8963	17.0373	15.8048	6.18782	6.25194	29.1919	24.8563	6.82635	9.59288	12.7316	18.9541	4.82901	6.93541	27.2912	24.6142
FBgn0035484	CG11594	-1.64781	1.16439e-13	Isolated Up	88.3477	46.6053	51.8291	129.79	183.281	30.5485	24.4664	61.5987	88.3925	46.0553	93.0148	118.234	85.6029	41.6706	50.762	196.12	166.546	56.9513	47.7367	114.138	159.643	32.2739	42.1673	157.819	95.0981
FBgn0038516	P5cr-2	-1.64841	0.00102705	Isolated Up	21.3459	4.27215	5.3501	26.2988	27.5049	2.12423	2.3257	4.45732	5.13328	7.30646	23.4946	33.3195	22.7847	13.5116	29.3001	61.0563	52.0576	13.994	19.0434	24.5378	33.3119	6.62647	8.95659	55.7246	29.81
FBgn0052512	CG32512	-1.65092	1.42853e-11	Isolated Up	12.2888	6.10307	6.63986	19.1334	19.2238	3.79327	2.3257	7.67243	8.98324	9.8514	10.4624	15.5269	10.9377	5.94867	5.87869	28.2815	21.0769	7.36271	8.88124	21.9532	19.9171	5.47288	5.70685	23.8026	19.9958
FBgn0039114	Lsd-1	-1.66402	2.87338e-06	Isolated Up	38.3804	25.6329	24.6964	105.892	109.006	13.0994	6.74453	17.1229	20.4705	12.068	29.047	40.5694	20.4046	21.4631	36.3919	46.9596	40.5536	22.6245	28.9494	28.9412	57.6064	9.7385	13.5934	118.704	70.8512
FBgn0030262	Vago	-1.66545	1.6833e-05	Isolated Up	15.3487	5.15987	9.07606	18.2426	15.8016	3.26222	7.11664	5.06624	9.67185	4.55627	14.1335	13.8051	12.8364	7.11449	15.6299	30.3373	30.098	11.2147	15.229	18.5071	31.3859	1.87795	2.77416	47.2656	38.2072
FBgn0001967	NimC3	-1.66583	0.0448798	Isolated Up	0.134072	0.22193	0	0.193658	0.126751	0.050577	0	0.0243569	0	0.082095	0.0917758	0.271872	0	0.0298928	0	0.205577	0.11035	0.195039	0	0.319088	0.612834	0.0536556	0.118893	0.246979	0.262412
FBgn0054054	CG34054	-1.66713	3.8283e-06	Isolated Up	4.0378	1.77544	2.10183	7.20408	4.56302	1.39087	0.837252	1.55884	1.81543	2.25761	3.44159	7.73326	7.03329	1.04625	1.91291	3.11302	4.05536	3.07186	3.75745	3.06324	5.60305	1.87795	2.33822	15.961	9.39435
FBgn0262481	CG43071	-1.67267	0.00096802	Isolated Up	1.86735	0.44386	0.477688	3.64077	3.21102	3.03462	2.69781	0.852492	0.719911	0.123143	0.504767	4.04788	0.989475	1.10603	1.58631	3.4067	3.17256	0.438837	1.19555	2.77606	3.06417	0.0536556	0.277416	3.42683	3.5688
FBgn0038716	CG7342	-1.67311	3.16655e-09	Isolated Up	2.00975	0.832237	1.71968	2.90487	2.36601	1.61846	1.34891	2.97154	3.72476	1.6419	0.550655	1.02707	1.36387	1.10603	0.793157	4.31711	3.20015	0.731395	0.370052	3.57378	3.8521	0.402417	1.62487	3.67381	2.51916
FBgn0030394	Cpr11A	-1.67357	0.00130075	Isolated Up	1.975	0.943202	0.812069	0.23239	0.211251	0.227596	1.02331	1.19349	1.22072	0.205238	2.56972	3.05101	2.08592	0.866892	0.513219	4.11153	3.94501	1.95039	0.597776	8.392	5.77815	1.20725	1.38708	2.40804	2.46667
FBgn0040398	CG14629	-1.67436	2.32191e-05	Isolated Up	150.017	31.5695	50.5871	221.816	278.26	28.9047	43.5371	65.8368	117.22	148.387	236.277	121.89	89.7748	54.2256	125.086	333.093	315.573	60.5107	103.273	137.208	257.171	22.8305	39.5516	414.894	302.928
FBgn0038214	CG9616	-1.68027	0.00306355	Isolated Up	1.18848	0.44386	0.477688	1.85912	2.36601	0.202308	0	0.146142	0.156502	0.410475	0.963646	1.72186	0.962732	0.62775	1.21306	0.46989	1.1035	0.877674	0.939362	1.24444	1.0068	0.563384	0.792618	5.61877	4.35604
FBgn0033782	sug	-1.68459	0.000348552	Isolated Up	12.4257	7.40691	5.92333	15.2603	37.2647	2.68058	0	6.35716	6.94871	7.63484	13.904	12.929	12.2748	6.87535	8.21151	19.8822	15.3111	7.21643	13.0372	12.8592	20.2235	2.19988	3.09121	27.1368	33.5887
FBgn0034717	CG5819	-1.68535	0.000115763	Isolated Up	13.6925	4.77149	6.83093	38.5767	30.5047	2.50356	2.69781	4.53039	5.28978	13.2173	20.7872	13.1405	8.4239	3.61703	9.56454	30.5135	28.9117	5.85116	11.4147	9.89171	14.7518	1.95843	2.81379	35.5958	22.4625
FBgn0032613	Nepl9	-1.68782	0.000104198	Isolated Up	6.13093	1.30384	1.91075	10.7674	8.02754	1.28971	0.279084	3.19076	5.82189	3.53009	7.47973	5.37703	2.5138	2.75014	5.92535	18.7369	18.6216	4.24209	5.92083	5.48831	7.5291	1.71698	1.94191	16.2697	6.50782
FBgn0032483	CG15482	-1.69128	0.00216748	Isolated Up	0.209287	0.0832237	0.238844	0.0387316	0.211251	0.101154	0	0.414068	0.344305	0.287333	0.0917758	0.392705	0.508109	0.119571	0	0.528626	0.358638	0.0975193	0.170793	0.382905	0.0437739	0.134139	0	0.370468	0.104965
FBgn0032945	CG8665	-1.69198	8.66179e-07	Isolated Up	19.6464	8.40559	9.55375	26.841	29.8287	7.20722	10.4191	27.2554	30.9249	6.28027	25.5596	33.0778	32.2248	8.28031	13.0638	50.7775	43.2296	11.361	18.1325	16.6883	22.5873	1.34139	3.05158	24.8214	10.6014
FBgn0039827	CG1544	-1.69909	6.05668e-13	Isolated Up	18.6603	10.181	12.7543	32.1085	41.5742	6.32212	11.8146	19.1933	21.7225	8.37369	18.9517	22.1425	17.6501	6.36717	11.4308	39.2945	36.0845	7.70403	11.7563	17.9965	22.85	4.45342	6.18242	39.5784	21.3603
FBgn0262366	CG43064	-1.70403	0.0030904	Isolated Up	1.84252	0.749013	1.86298	3.95062	4.81653	0.0758655	0.511654	0.779421	0.344305	2.29866	1.83552	0.604161	0.240683	0.777214	0.933126	3.67101	3.14498	0.292558	1.59407	1.21253	2.32001	0.268278	0.317047	7.31675	4.30356
FBgn0038795	CG4335	-1.70995	1.95934e-05	Isolated Up	7.49056	2.55219	3.53489	16.9644	14.7031	1.77019	2.04662	3.70225	4.31947	1.97028	3.21215	8.94158	6.63215	4.42414	11.4774	21.145	20.5527	3.80325	8.39732	4.24386	6.6974	1.39505	1.94191	17.4738	7.87236
FBgn0036756	Cln3	-1.71106	1.39169e-10	Isolated Up	4.96263	3.60636	4.06034	10.5737	8.8303	2.12423	1.20936	4.28682	3.41175	3.16066	2.93683	2.83956	2.96842	2.15228	2.33281	10.5138	7.20034	2.48674	1.59407	9.98744	12.6506	1.85112	3.17047	7.96507	7.19009
FBgn0053493	CG33493	-1.71768	1.51582e-10	Isolated Up	20.6186	10.7359	10.9868	31.2564	37.0112	5.74049	12.6053	10.4978	17.7787	8.08636	10.5083	28.1539	19.5221	9.44614	21.5552	45.8142	40.526	12.4337	15.0013	24.4102	30.2915	4.13148	6.34095	48.6857	33.3263
FBgn0283427	FASN1	-1.71795	1.02145e-13	Isolated Up	541.358	323.019	293.491	1366.45	1602.8	269.752	195.87	406.785	466.847	281.586	353.016	528.732	340.7	210.804	243.033	993.523	865.999	281.148	399.997	548.99	986.882	199.867	292.397	930.524	610.37
FBgn0026756	Ugt37A1	-1.72012	0.00637278	Isolated Up	0.181481	0.138706	0.143306	0.193658	0.0845004	0	0	0.0974277	0	0.123143	0.0458879	0.241664	0.427881	0.20925	0.0933126	0.440522	0.4414	0.195039	0.0284655	0.287179	0.612834	0.107311	0.0396309	0.246979	0.157447
FBgn0053120	CG33120	-1.72087	0.000189821	Isolated Up	8.70989	2.99605	3.63043	25.0206	22.4771	1.08741	2.46524	3.89711	3.56825	11.3291	15.556	11.8113	7.00655	1.88325	4.15241	14.4785	13.1041	2.7793	5.12379	5.64785	7.48533	1.58284	1.26819	26.6737	14.0128
FBgn0035817	CG7409	-1.72133	1.14372e-11	Isolated Up	82.3164	40.4467	44.9026	141.448	138.243	20.686	79.1203	103.834	121.289	18.8408	22.6686	74.7951	101.114	43.5838	29.0669	90.7768	94.2113	56.61	35.2972	76.581	119.94	63.4746	47.4778	213.853	197.334
FBgn0043578	PGRP-SB1	-1.72786	1.9928e-06	Isolated Up	46.4919	14.9525	34.298	58.9882	33.3354	10.2166	15.7682	29.1796	28.3269	13.3404	27.028	96.847	25.7263	15.634	46.6563	73.3322	70.7619	30.6698	54.6538	77.7616	185.82	10.2214	10.3833	85.146	66.7576
FBgn0262539	CG43093	-1.72938	8.49866e-08	Isolated Up	7.86296	1.83092	1.38529	8.71461	7.94304	3.41395	1.20936	4.26246	5.19588	4.39208	6.37842	12.4457	14.7084	5.08178	4.8056	18.0614	13.0489	6.43627	7.65722	10.0193	14.5767	1.79746	4.08198	16.5167	14.7476
FBgn0046876	Obp83ef	-1.73139	0.000171381	Isolated Up	3.12733	1.49803	2.53174	9.06319	8.6613	0.758655	0.139542	0.974277	0.845113	1.60085	2.06496	2.11456	3.12888	1.88325	3.12597	5.31563	5.46233	1.80411	2.59036	2.04216	2.71398	0.321934	0.951142	8.79862	6.66527
FBgn0263336	lncRNA:CR43417	-1.73309	1.75143e-13	Isolated Up	5.32425	1.8864	1.57637	8.86954	10.1401	1.66904	2.93038	5.50466	5.97839	2.05238	3.99225	6.40411	7.43443	3.19853	3.63919	14.1554	9.9315	3.5107	4.52602	7.53047	6.5223	1.71698	1.86265	8.55164	4.19859
FBgn0003886	alphaTub85E	-1.73314	0.00881193	Isolated Up	1.27602	0.305153	0.191075	0.580974	0.633753	0.151731	0	0.31664	0.500808	0.49257	0.825982	4.68225	5.50897	0.478285	0.37325	0.234945	0.2207	0.877674	1.11015	0.989171	1.61963	1.66333	1.38708	3.85904	3.62129
FBgn0003507	srp	-1.73523	8.51595e-06	Isolated Up	20.1071	8.2114	9.69706	42.2562	31.2229	5.00712	0.372112	11.7157	12.1759	7.30646	16.4279	26.7945	18.3454	10.6717	19.5956	47.3708	42.2365	13.1651	21.2353	26.8991	34.4938	4.48025	6.61836	39.6092	26.6611
FBgn0260474	CG30002	-1.73882	5.6885e-06	Isolated Up	12.1565	2.96831	3.24828	14.9504	15.5058	1.39087	2.04662	7.16093	9.76575	13.7099	16.1067	15.9196	10.1087	4.36435	10.2644	21.8499	23.5597	5.50984	7.54336	13.7846	20.3111	2.79009	4.39903	40.5663	23.932
FBgn0026878	CG4325	-1.73934	3.82268e-08	Isolated Up	3.02782	1.30384	1.86298	4.5316	5.32353	1.28971	2.09313	1.4127	1.43982	0.82095	1.56019	4.16871	4.97412	1.674	3.40591	5.08068	7.22793	1.46279	1.93565	3.54187	4.55248	0.590212	0.634095	7.68722	4.09363
FBgn0039031	Gbp3	-1.73974	3.96861e-07	Isolated Up	32.7452	10.2365	16.4325	49.4603	53.0663	13.3017	10.1866	14.5898	26.7619	13.0942	24.0912	31.5976	23.2125	14.0197	38.4448	82.6712	86.8455	15.213	32.4222	33.4085	56.512	3.38031	9.35289	76.2547	51.3278
FBgn0032896	CG14400	-1.74047	9.36338e-06	Isolated Up	8.94675	3.19024	3.8215	19.2109	18.7168	1.06212	2.79084	2.36262	4.28817	5.62351	8.99403	8.2468	5.88336	4.48393	8.95801	21.2038	19.9182	5.50984	6.17701	9.28545	12.0816	1.39505	2.57601	24.667	14.2752
FBgn0040256	Ugt35C1	-1.74108	1.42517e-07	Isolated Up	46.3005	23.802	24.6009	76.4562	68.6144	9.93838	9.34931	23.0904	29.8607	29.7184	41.3909	39.2705	29.6308	30.7298	30.2799	155.915	145.276	17.9436	20.666	42.662	42.5044	20.7111	22.867	110.122	65.8129
FBgn0039800	Npc2g	-1.7424	7.40357e-08	Isolated Up	134.618	39.2538	65.3477	185.137	193.464	49.5907	62.0962	71.4876	134.216	59.642	96.0893	113.582	79.5324	52.1032	150.84	340.729	333.34	66.2644	116.31	106.416	215.499	20.3623	42.7221	356.174	280.623
FBgn0036157	CG7560	-1.74953	6.65177e-07	Isolated Up	9.75704	4.5773	4.68134	17.9715	19.7309	2.47827	1.20936	4.18939	7.07391	6.03398	8.81048	6.3739	4.59972	4.48393	7.69829	21.0276	17.5457	6.24124	6.94558	10.3384	15.0144	3.11203	2.97232	31.7985	19.261
FBgn0040827	CG13315	-1.75171	1.91718e-05	Isolated Up	173.707	71.9885	135.568	328.057	275.049	16.1593	15.3031	91.4602	133.497	34.1926	145.006	166.809	115.956	74.4929	179.907	410.948	411.412	84.0129	197.807	155.332	222.853	31.8178	64.5984	478.305	328.435
FBgn0039856	CG1774	-1.75237	1.16174e-14	Isolated Up	20.8935	10.403	11.8467	30.7916	33.3354	7.28309	5.34911	11.6183	16.3701	7.4296	15.1889	26.7039	25.6461	9.5956	14.9767	40.7042	35.6155	12.6288	13.1795	33.1213	53.1852	8.7727	9.78883	41.6159	26.2937
FBgn0032603	CG17928	-1.75611	4.19423e-08	Isolated Up	27.7868	10.7913	8.78945	47.9497	50.0665	5.4876	9.72143	13.1771	10.4857	14.695	21.0626	23.9248	17.4629	16.1421	16.3764	84.5214	65.0789	14.2866	22.687	31.9726	38.915	13.709	13.9104	66.283	49.3859
FBgn0033798	CG15870	-1.75763	0.000116923	Isolated Up	0.740287	0.249671	0.38215	0.116195	0.718254	0.151731	0	0.584566	0.970315	0.287333	0.963646	1.54061	0.722049	0.388607	0.653188	1.67398	1.5449	0.682635	0.199259	0.638175	0.875477	0.214623	0.356678	2.06845	1.7844
FBgn0032835	CG16772	-1.75885	6.38249e-07	Isolated Up	67.3844	31.8747	17.0057	56.0446	67.5581	15.8812	14.6984	24.8684	37.4667	34.2747	57.9564	70.8077	79.3986	34.3768	32.0995	120.439	107.867	61.5347	70.9076	164.266	233.927	15.265	19.8947	141.118	107.694
FBgn0031693	Cyp4ac1	-1.76154	1.25929e-05	Isolated Up	22.5042	3.99474	6.73539	22.658	23.1109	3.26222	7.53527	11.4478	18.2169	10.7544	15.7854	16.0405	10.3761	11.8675	23.7014	76.034	72.1413	16.7246	24.7935	26.0056	37.4704	4.34611	5.66722	53.2239	38.2072
FBgn0034870	CG13559	-1.76571	5.72348e-07	Isolated Up	1.01106	0.749013	0.573225	1.78165	1.98576	0.632212	0	0.974277	1.06422	0.451523	0.734207	0.543745	0.989475	0.269036	0.933126	2.1145	2.26218	0.487597	0.797034	1.27635	1.05057	0.321934	0.158524	2.59328	1.52199
FBgn0016053	pgc	-1.76869	0.037451	Isolated Up	0.0977121	0.0832237	0	0.503511	0.0845004	0.050577	0	0.0730708	0	0.16419	0.0458879	0.241664	0.374396	0.0896785	0	0.0587362	0.11035	0	0.0853965	0.159544	0	0.0536556	0	0.0617447	0.104965
FBgn0034331	BomBc2	-1.77412	4.02777e-06	Isolated Up	67.2742	25.7161	24.1232	148.342	125.863	12.4925	13.0704	21.8725	30.2676	20.4006	65.4362	64.2827	45.9437	18.8325	49.8289	84.4039	103.094	56.2686	74.0672	82.0055	162.357	12.8774	29.2872	199.158	144.589
FBgn0051664	CG31664	-1.78259	0.00484441	Isolated Up	4.8902	2.6909	2.72282	11.4258	18.3366	0.783943	0	2.28955	2.81704	1.19038	2.98271	1.54061	0.829019	0.896785	1.95956	6.54909	6.1796	5.50984	8.02727	5.55212	8.09816	0.61704	1.86265	16.5785	7.92484
FBgn0053966	CG33966	-1.78376	0.0454411	Isolated Up	0.0689824	0.0554825	0	0.0774632	0.0845004	0.126442	0	0.0243569	0.062601	0.082095	0	0.120832	0.320911	0	0.0933126	0.176209	0.165525	0	0.056931	0.0638175	0	0	0	0.0926171	0.0524824
FBgn0029648	CG3603	-1.7856	4.14033e-10	Isolated Up	11.2611	2.99605	5.25456	9.91529	7.14029	2.52885	4.74443	10.2299	17.81	2.66809	7.02085	16.7655	9.78777	6.99492	8.91135	29.3094	28.2496	8.0941	8.59658	12.4444	17.1156	4.07783	4.83497	27.8777	16.8993
FBgn0000337	cn	-1.78617	1.0318e-07	Isolated Up	0.674565	0.499342	0.143306	1.23941	2.07026	0.303462	0	0.730708	0.563409	0.246285	0.0917758	0.755201	0.588336	0.4185	0.37325	0.939779	0.800038	0.682635	0.398517	1.49971	1.26944	0.295106	0.515202	0.926171	0.839718
FBgn0034471	Obp56e	-1.78884	9.77184e-06	Isolated Up	252.869	56.6476	123.769	696.162	609.459	15.2742	62.5148	91.0949	87.7352	91.4949	149.319	496.318	532.685	217.171	351.089	439.699	292.565	98.2019	62.5672	371.163	272.317	156.353	109.064	351.297	334.89
FBgn0031563	CG10031	-1.79258	2.12753e-06	Isolated Up	14.7401	5.13213	6.83093	32.4571	27.9696	3.00933	2.27919	4.72524	7.91902	2.5039	10.2789	13.0801	10.2959	6.75578	14.93	32.1874	36.3879	10.9222	13.8058	16.3054	19.0854	4.29245	6.61836	42.1099	23.8795
FBgn0043575	PGRP-SC2	-1.79319	0.0103391	Isolated Up	1.91431	0.138706	2.00629	4.22174	0.718254	0.101154	0	1.94855	1.94063	1.31352	2.01907	8.76034	0.10697	0.747321	1.58631	0.411153	0.33105	0.731395	1.93565	1.0849	8.5359	0.402417	0.317047	4.53824	2.04681
FBgn0063491	GstE9	-1.79352	2.84725e-08	Isolated Up	65.5621	25.5497	39.3615	110.695	102.415	24.4034	25.6292	30.8602	47.1698	25.4905	42.9052	59.2984	33.8293	24.0936	59.6734	183.903	147.317	37.9838	50.7825	53.16	78.0488	13.0652	21.4007	204.776	131.678
FBgn0034045	CG8249	-1.79522	1.30861e-12	Isolated Up	9.00809	4.35537	4.10811	14.718	13.9426	1.315	4.23277	8.91463	13.5218	3.94056	8.39749	11.177	6.41821	4.9921	5.69207	21.8205	19.9182	4.33961	4.46908	12.4125	11.425	3.21934	4.08198	21.4872	7.29505
FBgn0034407	DptB	-1.79695	0.0320632	Isolated Up	20.1994	1.7477	28.5179	68.4775	4.47852	1.84606	5.48865	6.28409	1.47112	6.93703	8.25982	135.604	4.54623	6.60632	30.2799	13.8324	6.01408	4.24209	10.0483	32.0364	90.4368	13.5212	0.752987	1.72885	1.62695
FBgn0259101	CG42249	-1.80185	5.94494e-06	Isolated Up	2.05354	0.91546	0.286613	3.33092	3.12652	0.960963	1.81405	1.26656	0.532108	0.16419	1.00953	1.69165	1.89872	0.388607	0.933126	2.81934	2.48288	1.99915	1.33788	3.35042	4.77135	0.831663	1.50597	5.98924	5.87803
FBgn0014865	Mtk	-1.80673	0.0254116	Isolated Up	10.476	2.80186	13.3275	19.6757	4.98553	0.935674	0	3.26383	0.313005	3.61218	4.5429	39.935	1.95221	4.09532	10.1244	3.4067	5.04851	3.0231	13.7773	14.0718	77.9612	2.22671	2.77416	10.2805	9.28939
FBgn0034198	CG11400	-1.80944	1.72993e-10	Isolated Up	23.5647	10.2365	16.4325	50.5835	42.3347	6.24626	7.81435	9.54791	13.4592	11.206	22.4851	38.0924	32.3585	6.57642	13.3904	35.4473	34.2361	11.7023	17.9902	30.09	39.1776	6.25088	8.67917	58.4414	42.7732
FBgn0267347	squ	-1.82117	3.64925e-06	Isolated Up	0.666396	0.527083	0.191075	1.39434	1.09851	0.303462	0	0.584566	0.65731	0.287333	0.642431	0.785409	0.855762	0.239143	0.419907	2.26134	2.34494	0.292558	0.341586	0.542449	0.481512	0.37559	0.277416	0.617447	0.472342
FBgn0031389	CG4259	-1.82222	7.45547e-07	Isolated Up	5.24454	1.52577	1.24199	13.7884	14.7031	1.28971	3.58158	1.97291	1.31462	2.91437	3.12038	3.86663	3.9579	2.98928	4.99222	6.69593	6.1796	2.34046	2.84655	6.89229	8.44835	1.60967	2.1797	15.1892	12.2284
FBgn0264776	CG44014	-1.82475	2.44991e-06	Isolated Up	10.7051	2.77412	2.77059	17.0806	14.3228	3.26222	5.3026	5.8213	9.92225	4.67942	7.93861	9.09262	3.47653	4.06543	12.1773	27.0187	27.2289	5.02224	10.5038	9.60454	11.7314	1.26091	2.81379	35.2254	23.827
FBgn0031937	CG13795	-1.82497	7.31315e-06	Isolated Up	10.1606	1.10965	2.24513	3.6795	3.38002	3.64154	1.48845	7.38015	6.6983	3.89951	6.79141	17.7623	10.2157	5.73942	8.07154	28.4871	26.7599	7.55775	10.76	19.4643	19.3043	3.89003	4.08198	28.063	13.383
FBgn0031801	CG9498	-1.82645	1.14882e-07	Isolated Up	47.0969	14.5087	14.4739	81.4913	76.7264	8.24405	8.60509	15.0769	21.9729	26.2294	32.6263	59.3588	63.4066	28.1292	43.6703	137.472	130.903	32.864	37.0052	64.5514	71.1763	12.5822	15.5749	78.0453	55.6313
FBgn0040733	BomS6	-1.82701	0.000924158	Isolated Up	15.6763	2.2193	11.2257	50.5447	35.8282	1.315	6.93059	6.60073	12.6454	1.39562	8.58104	9.93845	6.6589	5.88889	27.8071	36.299	48.6368	6.33876	11.6709	5.55212	18.5163	1.18042	6.06353	23.0617	31.332
FBgn0261393	alpha-Est5	-1.82817	4.79601e-10	Isolated Up	3.91278	1.7477	2.57951	8.52095	7.90079	0.758655	1.44193	2.33826	2.78574	1.68295	2.01907	3.83642	3.63699	1.82346	2.986	10.7781	9.24181	1.51155	3.18814	4.56295	5.95324	0.938974	2.1797	7.87245	3.62129
FBgn0038676	CG6026	-1.83082	6.72045e-06	Isolated Up	2.17151	0.998684	0.38215	5.07384	3.21102	0.556347	3.02341	5.21238	4.44467	1.39562	0.596543	1.14791	1.55107	1.28539	0.933126	5.05131	4.05536	1.07271	1.36634	3.70142	4.8589	0.321934	0.554833	0.586575	0.734754
FBgn0031694	Cyp4ac2	-1.83287	2.29491e-08	Isolated Up	4.14515	0.887719	1.5286	7.32027	8.32329	1.01154	1.16285	2.84976	4.85157	2.21657	4.31346	3.71559	2.83471	2.18218	3.35925	11.3361	9.51769	1.95039	3.2166	3.19088	4.59625	1.09994	1.10967	10.0335	6.8752
FBgn0035090	CG2736	-1.83342	0.00119643	Isolated Up	73.0385	15.2577	19.7763	131.068	154.298	4.19789	3.67461	34.1484	46.5751	81.0278	133.213	67.9681	34.8188	25.8573	54.5412	221.171	198.133	19.4063	44.1785	50.0329	106.064	8.15566	13.8708	172.916	112.575
FBgn0053474	CG33474	-1.83629	0.000681059	Isolated Up	0.608631	0.249671	0.238844	0.619706	0.422502	0.126442	0	0.292283	0.187803	0.123143	0.137664	0.422913	0.294168	0.328821	0.419907	1.11599	1.13109	0.146279	0.597776	0.733901	0.700382	0.670696	0.43594	2.902	2.30923
FBgn0051636	CG31636	-1.83911	5.08534e-05	Isolated Up	7.37991	2.02511	1.86298	5.92593	5.74603	0.960963	0	7.28272	6.354	3.77637	4.95589	8.76034	5.72291	6.33728	5.92535	22.3198	20.7458	5.70488	4.44062	17.7094	21.3179	2.95106	3.28937	6.91541	6.08796
FBgn0030218	CG1628	-1.84095	2.08659e-08	Isolated Up	21.2169	11.3184	12.5154	52.3264	64.0936	5.33587	4.93048	11.2773	17.5596	10.1798	22.8063	13.9259	13.7457	7.98139	12.3173	55.9462	44.3607	9.55689	14.7167	19.1453	29.416	5.15094	5.66722	36.1207	28.8128
FBgn0037419	Osi12	-1.84764	0.0219536	Isolated Up	0.107922	0	0	0.116195	0.0422502	0	0	0.194855	0.125202	0	0.0458879	0.0302081	0.374396	0.0896785	0.0466563	0.0881043	0.2207	0	0.284655	0.350996	0.262643	0.0804835	0.0396309	0.0926171	0.104965
FBgn0058006	CG40006	-1.85883	1.04143e-05	Isolated Up	10.7621	3.27346	2.91389	24.4009	19.8999	2.22539	0.372112	3.65354	1.97193	4.96675	7.70917	12.2947	5.80313	7.65257	4.29238	23.4651	16.7732	8.14286	8.39732	21.7299	17.816	4.64121	6.89578	29.267	19.7334
FBgn0039040	CG13833	-1.8594	0.00012203	Isolated Up	48.2586	9.37653	11.7511	82.2659	82.7259	6.09453	18.3265	11.9592	18.0291	49.4212	46.1632	24.8008	15.8048	20.2076	20.8554	147.633	119.647	25.9889	33.7886	28.9412	59.0072	14.8894	19.8947	154.547	136.087
FBgn0035791	CG8539	-1.86409	2.55831e-11	Isolated Up	16.8102	8.46107	10.6047	40.3583	62.3191	6.32212	11.5355	7.13658	10.2353	9.35883	10.6001	19.1217	19.4151	5.97857	7.97823	33.0098	18.456	5.071	6.68939	17.5817	26.2205	5.90212	8.00544	32.3542	20.7305
FBgn0086687	Desat1	-1.86595	5.66345e-14	Isolated Up	1041.27	421.556	559.85	2462.67	2030.42	369.06	355.786	664.652	914.318	443.067	575.802	1080.78	724.349	481.155	646.796	2527.68	2388.17	571.902	786.16	1028.64	1311.07	376.368	355.687	2584.14	1330.43
FBgn0014019	Rh5	-1.8672	3.23027e-11	Isolated Up	197.112	116.153	111.11	416.868	458.288	20.1044	37.5368	155.324	174.469	66.9485	82.0017	205.052	144.731	122.292	148.507	272.654	256.729	116.292	90.4064	304.09	370.589	107.472	96.8183	399.859	456.387
FBgn0039073	CG4408	-1.86799	0.00153489	Isolated Up	11.5058	0.776754	2.53174	15.6476	20.5759	2.22539	0.790738	9.74277	17.7161	16.2138	26.615	14.3186	10.2691	2.33164	5.17885	27.048	22.6218	1.99915	5.03839	6.41366	15.1895	0.509729	1.34745	32.3542	18.6837
FBgn0000615	exu	-1.86983	5.4289e-05	Isolated Up	0.7809	0.471601	0.286613	3.29219	2.99977	0.480481	0.790738	0.901206	1.75283	0.369428	0.550655	0.302081	0.374396	0.119571	0.0933126	1.20409	0.99315	0.438837	0.113862	0.478631	0.525286	0.187795	0.554833	0.987915	0.472342
FBgn0037228	CG1092	-1.87218	3.85665e-05	Isolated Up	10.218	2.66316	2.10183	9.99275	11.7033	1.71962	0	9.47484	10.4231	4.10475	7.02085	11.5395	7.32746	6.45685	12.5039	24.17	25.1046	3.12062	5.43691	8.0091	15.3208	6.68013	5.94464	28.9583	25.454
FBgn0037988	CG14740	-1.87542	0.0316219	Isolated Up	0.12341	0.0832237	0.0955375	0.116195	0.126751	0.126442	0	0.0243569	0.62601	0	0.0917758	0.0302081	0.0534851	0.0896785	0	0.0881043	0.0275875	0.0975193	0	0.0957263	0	0.0536556	0.0396309	0.308724	0.787236
FBgn0051354	Hsp70Bbb	-1.88329	0.000687831	Isolated Up	0.493933	0.332895	0.0955375	0.619706	0.464752	0.455193	0	0.31664	0.344305	0.32838	0.458879	1.99373	0.909247	0.0597857	0.186625	0.146841	0.2207	0.438837	0.398517	0.76581	0.656608	0.0804835	0	1.1114	1.46951
FBgn0011770	Gip	-1.88396	1.56462e-20	Isolated Up	32.5864	15.6738	20.0629	47.7173	51.4185	13.6811	17.1637	24.4543	41.9113	12.3143	17.7127	50.5683	25.5124	13.3322	20.6687	61.6143	52.7473	16.4808	14.005	34.8763	45.6561	9.44339	14.4653	99.8721	60.7221
FBgn0039758	CG9737	-1.88673	0.0273678	Isolated Up	0.101938	0	0	0	0	0.0252885	0	0.170498	0.0313005	0.082095	0.0458879	0.0604161	0.187198	0	0	0.146841	0.165525	0.0487597	0.113862	0.478631	0.131322	0.160967	0.0792618	0.308724	0.20993
FBgn0032820	fbp	-1.88768	4.26391e-14	Isolated Up	61.4002	30.2657	38.1195	106.163	115.892	24.3275	21.9081	27.0118	49.7052	19.4565	38.5458	97.8741	61.4811	23.5556	45.3966	131.481	111.564	37.2036	35.3257	70.5503	107.99	15.6674	18.1113	152.695	93.3137
FBgn0037684	Srr	-1.88788	9.27923e-11	Isolated Up	7.306	3.05153	3.96481	18.5524	17.9141	1.84606	0.93028	4.2381	7.32431	3.32485	5.09356	11.6905	7.167	2.9295	6.85847	13.1863	10.5936	3.85201	4.52602	6.03076	8.75477	2.09257	2.85343	16.3932	12.1759
FBgn0035189	CG9119	-1.88981	1.14917e-13	Isolated Up	46.3954	24.3845	24.3621	52.0165	68.6144	17.8284	15.5822	20.6303	67.4525	21.8373	40.1978	76.4868	60.5719	12.6746	23.7481	93.5374	84.9143	25.9401	32.6499	83.6329	118.54	9.01415	13.7519	84.3433	40.7788
FBgn0050289	CG30289	-1.89342	0.0066577	Isolated Up	0.610428	0.0832237	0	0.154926	0.295752	0.252885	0.046514	0.0730708	0	0.410475	0.367103	0.724993	0.989475	0.239143	0.279938	0.822307	0.99315	0.341318	0.740103	0.670084	0.481512	0.107311	0.634095	3.58119	2.36171
FBgn0037000	ZnT77C	-1.89573	3.95739e-12	Isolated Up	5.50935	4.16118	3.20051	14.2145	13.2666	1.36558	4.55837	4.16503	3.88126	2.01133	2.24851	8.18638	12.8632	2.511	1.07309	9.36843	8.52454	1.46279	2.70422	4.85013	6.65363	2.81692	2.93269	7.5946	7.60995
FBgn0036787	CG4306	-1.89605	6.84824e-05	Isolated Up	4.84772	1.80318	2.48398	21.496	20.6181	1.49202	0.976794	2.89847	4.06906	3.89951	7.15851	7.61243	4.57298	1.2555	2.75272	8.7517	9.32458	1.17023	2.64729	1.59544	3.28304	0.697523	0.911511	3.4577	1.41702
FBgn0040735	BomT2	-1.89791	1.23735e-08	Isolated Up	10.3461	1.77544	4.34696	29.6297	16.3508	3.0852	4.74443	8.01343	8.92064	2.25761	7.15851	19.4238	12.3551	2.511	8.07154	10.69	16.4697	7.36271	11.6139	8.77491	22.8062	1.26091	3.80457	19.1409	17.7391
FBgn0030157	CG1468	-1.89881	2.73031e-09	Isolated Up	46.0296	21.2498	26.3206	49.5764	49.8553	6.65087	12.3727	21.5072	41.567	15.4339	33.2228	53.4683	48.7517	15.0361	40.591	101.173	107.205	24.5749	36.9767	52.0432	75.9476	10.1946	16.0505	141.55	103.39
FBgn0046878	Obp83cd	-1.9036	6.23705e-05	Isolated Up	1.25944	1.02643	0.716531	2.24643	2.61951	0.556347	0.279084	0.340997	0.375606	0.49257	0.183552	2.17498	2.05918	0.298928	0.37325	0.646098	0.77245	0.195039	0.25619	1.94643	1.40076	1.1536	1.54561	4.10602	4.461
FBgn0037090	Est-Q	-1.90417	0.0018563	Isolated Up	14.4641	5.21535	3.63043	22.8904	25.1811	1.69433	0	3.75097	4.53857	13.1762	18.2175	12.0228	8.90527	5.79921	11.8507	56.3868	44.1676	6.0462	9.10896	15.4119	19.0854	2.38768	4.00272	33.0952	20.5731
FBgn0031942	CG7203	-1.90589	0.00274156	Isolated Up	224.384	133.629	125.059	133.275	57.0378	24.2011	15.7682	182.677	17.9352	98.0214	149.732	502.904	269.324	39.6678	54.2613	119.851	106.322	275.346	45.7725	1327.5	1133.35	80.5371	200.176	167.915	124.961
FBgn0266315	lncRNA:CR44980	-1.90837	0.00661205	Isolated Up	0.219473	0.194189	0.238844	0.348584	0.549253	0	0	0.219212	0.782512	0.082095	0	0.181248	0.133713	0.149464	0.0466563	0.881043	0.579338	0.243798	0.0284655	0.159544	0	0.0536556	0.198155	0.0926171	0.104965
FBgn0036995	atk	-1.90871	0.0011978	Isolated Up	10.5195	6.29726	7.83408	51.8616	13.0976	6.22097	2.74433	8.03778	12.708	2.91437	3.94636	10.5728	0.829019	2.95939	8.25816	17.2097	25.7943	4.68093	10.3899	1.05299	1.44454	0.831663	2.02118	37.3247	13.4355
FBgn0001225	Hsp26	-1.91292	9.6732e-05	Isolated Up	38.954	8.40559	11.8467	29.7459	31.6032	9.71078	8.69812	13.445	16.3388	11.0007	23.7699	86.1534	49.8214	16.7699	27.7605	13.6268	17.6284	40.373	30.3727	46.7782	66.3174	12.2067	16.3279	122.409	223.785
FBgn0033979	Cyp6a19	-1.91432	0.00510218	Isolated Up	0.205023	0.110965	0	0.96829	0.211251	0.0252885	0	0.0487138	0	0.0410475	0.137664	0.211456	0.615079	0.0597857	0	0.234945	0.248288	0.195039	0.25619	0.223361	0.218869	0.107311	0.198155	0.493958	0.314894
FBgn0013772	Cyp6a8	-1.91859	0.0264946	Isolated Up	34.4016	1.60899	1.00314	2.90487	3.16877	1.315	0.372112	1.89984	3.50565	27.4608	34.783	32.4132	17.8908	24.5719	30.3732	198.675	185.333	12.775	24.5088	20.8045	22.4122	15.1309	17.0809	89.9621	55.6838
FBgn0039237	CG13640	-1.91865	0.013083	Isolated Up	0.104261	0.0277412	0	0.0387316	0.169001	0	0	0.0730708	0.250404	0	0.22944	0.120832	0.0267426	0	0.0933126	0.146841	0.0827625	0.0487597	0.113862	0.25527	0.175095	0	0.0792618	0.308724	0.262412
FBgn0263406	lncRNA:CR43452	-1.91898	0.00329282	Isolated Up	2.27198	0.166447	0.238844	0.697169	0.338002	0.227596	1.48845	0.365354	0.187803	0.287333	0.367103	3.14164	2.43357	1.43486	1.39969	3.58291	4.414	2.7793	2.36264	12.5401	11.1623	1.09994	0.515202	2.03758	1.25958
FBgn0259229	CG42329	-1.92114	0.00661573	Isolated Up	9.66338	0.499342	0.573225	1.31687	0.549253	2.50356	0.139542	5.33417	3.66216	5.58246	4.35935	5.2562	4.89389	6.90524	4.89891	22.9365	17.1318	5.11976	6.29088	11.8701	12.7382	8.07517	8.59991	51.9582	40.7263
FBgn0030593	CG9512	-1.92148	1.40424e-06	Isolated Up	279.484	98.7865	126.826	216.393	250.628	32.7992	145.17	143.219	128.269	318.241	252.108	1045.83	1224.89	106.359	119.207	327.66	291.103	84.8906	56.0486	518.741	304.447	88.0757	144.811	369.11	314.002
FBgn0020513	Paics	-1.92213	9.65191e-12	Isolated Up	173.032	87.4681	98.4992	505.331	278.894	58.29	37.9554	94.6754	150.962	59.7652	115.316	291.84	127.188	69.9492	107.543	314.004	329.064	99.4209	132.194	193.048	216.768	43.2465	51.6391	512.574	177.128
FBgn0031305	Iris	-1.92291	0.0178369	Isolated Up	37.1156	6.43596	9.26714	95.822	113.907	4.65308	3.25598	23.8211	38.3431	47.4509	103.89	51.7464	45.7565	3.04907	5.87869	10.1614	10.2074	4.38837	7.51489	1.11681	2.80153	4.10466	6.18242	171.99	119.03
FBgn0262035	CG42846	-1.92327	3.2399e-08	Isolated Up	5.96911	1.30384	1.43306	7.55266	6.76004	2.4277	1.90707	3.26383	2.84834	1.6419	4.91001	7.03848	4.89389	2.511	4.10575	12.0997	13.5455	3.60821	5.97776	8.61536	10.6808	1.31456	2.06081	23.1543	9.60428
FBgn0263199	Galk	-1.92421	1.16915e-09	Isolated Up	60.5255	21.0833	19.9673	67.1606	66.2483	18.2836	17.6753	23.2365	34.4931	23.315	48.0446	77.0305	53.1375	28.5477	44.9767	180.555	164.615	26.9153	45.0609	76.3577	93.2821	19.5038	22.6292	192.427	88.0655
FBgn0053494	CG33494	-1.92767	1.40424e-06	Isolated Up	9.72277	4.9102	8.64614	34.9746	38.2787	2.14952	2.04662	4.4086	3.50565	3.65323	5.73599	7.85409	4.97412	2.30175	6.76516	13.245	10.6488	2.68178	6.80326	8.13673	8.22948	3.67541	4.47829	28.7113	16.532
FBgn0051777	CG31777	-1.92829	6.93015e-07	Isolated Up	9.27537	3.35669	5.06349	17.1194	16.6466	1.87135	1.48845	3.82404	6.8548	1.27247	4.26758	8.00513	7.43443	5.88889	11.4308	28.9276	23.2287	4.82721	7.23024	6.60511	12.1254	1.69015	2.85343	23.2778	17.3192
FBgn0013307	Odc1	-1.93066	3.85361e-06	Isolated Up	22.4956	7.18498	8.74168	74.4809	74.8674	5.0577	7.16316	4.9201	9.20234	11.1649	18.9517	18.1852	17.0617	8.7586	20.4355	35.9172	34.512	11.0684	19.6127	20.1982	36.2448	1.52919	4.43866	47.2656	42.9306
FBgn0039801	Npc2h	-1.93296	4.97436e-05	Isolated Up	72.4531	9.59846	17.6744	42.2562	32.4482	22.2033	28.9317	58.6028	90.9279	14.5308	32.764	65.914	36.1559	38.6215	94.7589	266.985	272.978	36.6185	76.5722	60.4033	113.856	7.91421	17.9132	167.359	132.885
FBgn0050148	CG30148	-1.93964	0.00020591	Isolated Up	3.00831	1.02643	1.14645	3.60204	4.39402	0.202308	0	0.511495	0.688611	0.903045	1.74374	5.01454	2.94168	1.04625	1.8196	3.02491	2.97945	2.14542	3.75745	5.13731	7.48533	1.1536	1.62487	13.0281	6.82271
FBgn0026176	SkpB	-1.9429	5.24361e-11	Isolated Up	1.93469	0.91546	0.955375	3.25345	2.45051	0.986251	0.46514	3.02026	2.47274	1.724	1.05542	2.74893	4.35904	0.657642	0.279938	0.969148	1.65525	1.36527	0.626241	3.54187	6.96004	0.885318	0.673725	1.94496	2.46667
FBgn0030968	CG7322	-1.9459	5.59378e-15	Isolated Up	28.4632	9.40428	13.6141	33.5028	43.729	10.3936	9.58188	13.2745	31.2379	12.1911	20.5578	41.959	30.1923	10.3429	22.3484	61.9961	54.706	12.2387	18.2464	39.2478	51.5218	6.6533	10.74	80.6695	44.7675
FBgn0265498	asRNA:CR44367	-1.95059	0.0268615	Isolated Up	0.108122	0.0277412	0	0.23239	0.126751	0.0252885	0	0.0487138	0	0	0.0458879	0.0906242	0.0534851	0	0.0933126	0.381785	0.248288	0.0487597	0.113862	0.0319088	0.0875477	0	0.237785	0.123489	0.577306
FBgn0037464	Mst84B	-1.95325	0.0324488	Isolated Up	0.0952466	0.0554825	0.0955375	0	0	0.050577	0	0.0730708	0.594709	0.123143	0	0.0604161	0.240683	0.0298928	0.139969	0.176209	0.0827625	0	0	0.159544	0	0	0.0396309	0.154362	0.20993
FBgn0030544	CG13403	-1.95663	0.048677	Isolated Up	0.155661	0.194189	0.191075	0.154926	0.464752	0.0252885	0	0.0487138	0.0939014	0.32838	0	0.785409	0.615079	0	0	0.205577	0.0827625	0	0.0284655	0.223361	0.175095	0	0.118893	0	0
FBgn0033821	CG10799	-1.9616	3.15357e-10	Isolated Up	19.5287	6.15855	10.939	30.6754	27.0824	7.48539	9.25629	13.7617	21.4095	8.90731	12.4356	13.654	9.52035	5.56007	13.8569	38.6778	37.7949	7.8503	10.4184	13.274	20.2673	4.98998	8.52065	78.1997	57.9931
FBgn0264874	asRNA:CR44065	-1.96358	6.18583e-09	Isolated Up	3.01902	2.52445	2.05406	9.29558	11.4076	0.50577	1.58148	2.72798	2.75444	0.98514	1.83552	3.98746	3.85093	1.13593	1.493	3.78849	3.66914	0.975193	1.62253	1.75498	1.61963	0.885318	0.832249	6.76105	4.40852
FBgn0260459	CG14106	-1.96585	0.0426685	Isolated Up	0.0514099	0.0554825	0	0.116195	0.169001	0.0252885	0	0.0730708	0	0.082095	0.0458879	0.0604161	0	0	0	0.0587362	0.0827625	0	0.0284655	0.159544	0	0.0268278	0	0.0926171	0.157447
FBgn0037396	CG11459	-1.97016	9.61631e-08	Isolated Up	3.20395	0.610307	3.00943	5.46116	5.78828	0.708078	0.46514	2.14341	4.28817	2.21657	3.25804	3.11143	2.99517	0.956571	1.77294	4.28774	6.45548	1.12147	2.41957	4.7225	8.75477	0.268278	0.475571	6.51407	5.09079
FBgn0085466	CG34437	-1.9786	0.023089	Isolated Up	0.245085	0.138706	0.429919	0.7359	0.464752	0	0	0.0243569	0	0.082095	0.183552	0.0604161	0.347653	0.0597857	0.0933126	0	0.11035	0	0.113862	0.574358	0.131322	0.107311	0.118893	1.26577	0.839718
FBgn0029831	CG5966	-1.98871	0.000148053	Isolated Up	26.2665	9.0159	11.369	79.5547	47.7427	0.758655	1.30239	5.26109	14.0539	19.1281	21.3379	36.7934	15.8583	10.1038	23.4681	64.8741	68.8032	12.2387	16.4246	26.4205	13.7888	6.08992	9.51142	82.6453	33.8512
FBgn0033079	Fmo-2	-1.99001	4.84504e-14	Isolated Up	19.0083	6.49145	5.73225	24.827	34.6029	6.72674	8.46555	10.9119	14.2104	7.96322	16.2902	22.0519	16.9548	7.11449	7.74494	47.2533	36.8017	13.5552	8.65351	40.3965	34.0561	4.77535	8.2036	51.8964	20.5206
FBgn0034324	CG18538	-1.99162	0.0141525	Isolated Up	0.0692281	0	0	0.154926	0.0422502	0	0	0.0974277	0	0.082095	0.0917758	0.15104	0.133713	0.0597857	0.0466563	0.176209	0.165525	0.0487597	0	0.0638175	0.0437739	0.0536556	0	0.0926171	0.157447
FBgn0013275	Hsp70Aa	-1.99693	0.00294078	Isolated Up	1.09076	0.471601	0.859838	1.43307	1.35201	0.202308	0.23257	0.267926	0.250404	0.16419	1.42253	3.05101	2.64751	0.179357	0.233281	0.0293681	0.055175	1.07271	0.683172	0.701993	1.61963	0.107311	0.237785	3.02549	5.87803
FBgn0002939	ninaD	-1.99695	3.58569e-05	Isolated Up	8.24744	7.32368	4.77688	12.8589	12.2103	0.455193	0.511654	5.33417	5.41498	2.70914	7.43384	5.19579	5.10783	2.24196	2.05288	15.0952	11.8075	1.36527	1.05322	8.29628	7.17891	6.49233	7.49024	37.1394	28.393
FBgn0039241	CG11089	-1.99722	1.17976e-13	Isolated Up	124.277	60.0875	57.8002	294.283	112.048	39.8041	71.1199	70.6107	106.046	45.5217	56.8092	405.936	124.273	34.9447	82.5816	187.75	204.534	78.0154	70.0821	159.959	170.762	35.7347	32.7351	340.09	141.125
FBgn0038236	Cyp313a1	-1.99783	5.60738e-05	Isolated Up	86.1486	31.1257	27.6103	198.151	168.705	5.2853	6.46545	41.4068	27.7322	21.8783	50.0637	34.6788	26.7158	44.0919	37.6516	246.81	194.602	50.1737	72.7294	74.7941	95.3395	49.7656	58.9312	269.732	233.127
FBgn0267339	p38c	-2.00477	0.000459357	Isolated Up	0.297438	0.0832237	0.334381	0.503511	0.676004	0	0	0.438425	0.281704	0	0.275327	0.211456	0.0802277	0.149464	0.279938	0.440522	0.33105	0.0487597	0.25619	0.51054	0.612834	0	0.158524	0.679192	0.787236
FBgn0263083	CG43351	-2.0064	0.00125064	Isolated Up	2.91508	0.582566	1.33753	7.24281	7.73179	0.0252885	0	0.535852	0.719911	0.287333	1.23897	3.20205	2.43357	0.508178	4.57232	5.02195	6.37271	2.5355	2.84655	2.26552	7.04759	0.402417	1.07003	5.00132	6.98016
FBgn0010383	Cyp18a1	-2.0092	1.05457e-07	Isolated Up	12.5309	4.82697	2.77059	24.4396	25.7726	2.04837	1.11634	4.72524	3.75606	11.3291	7.52562	28.6674	29.0157	8.01128	7.51166	17.9145	14.8973	9.50813	6.63246	19.5282	17.6846	3.03154	2.53638	27.5999	19.8908
FBgn0041579	AttC	-2.01903	0.0174106	Isolated Up	37.265	10.8746	63.9146	162.789	21.4631	3.89443	1.58148	10.4491	1.22072	8.66102	8.85637	176.929	4.86714	7.77214	25.1944	34.1257	16.9663	14.7254	34.7564	73.9964	190.197	13.1188	0.515202	5.86575	1.62695
FBgn0038291	CG3984	-2.01991	0.000155227	Isolated Up	5.944	4.18893	2.00629	5.30623	6.46428	0.303462	0.651196	0.94992	1.65893	0.65676	9.31525	4.31975	4.19858	0.717428	2.2395	8.63422	7.44863	3.70573	2.67576	11.4233	15.0144	1.4487	3.329	25.5314	20.4681
FBgn0001187	Hex-C	-2.02449	2.57262e-08	Isolated Up	53.5456	21.6382	35.0145	97.9909	97.0065	10.8488	14.3728	19.242	31.7387	14.9002	45.9797	63.3463	29.9517	14.1393	41.804	114.829	113.026	26.4765	34.8987	53.6386	80.8503	7.43131	14.2275	201.133	100.609
FBgn0035186	CG13912	-2.03211	2.7255e-05	Isolated Up	7.36835	2.63542	3.86927	17.6229	14.9566	0.859809	0	2.97154	4.00646	1.31352	4.35935	10.7843	4.86714	3.94585	9.65785	13.5387	13.9317	2.97434	5.7785	7.6581	12.6944	1.12677	1.90228	18.2764	17.1093
FBgn0032266	CG18302	-2.0349	1.49112e-05	Isolated Up	5.76284	1.13739	1.09868	7.55266	5.02778	0.910386	0.23257	2.04598	1.31462	1.14933	2.89094	5.49787	3.36956	3.91596	2.00622	17.3859	13.4627	3.21814	7.20177	10.6894	9.76157	3.21934	2.89306	19.5731	12.7532
FBgn0032472	CG9928	-2.03536	2.22367e-08	Isolated Up	44.0557	6.07533	15.286	70.8401	73.5576	7.78886	11.4424	19.8509	30.1424	8.9894	24.3665	44.134	35.7548	16.9791	45.3966	93.2437	92.9423	25.8914	43.4953	54.6278	84.79	7.91421	15.6542	132.813	95.3605
FBgn0041250	Gr21a	-2.03546	0.0110268	Isolated Up	0.148844	0.0277412	0	0.0774632	0.0422502	0.151731	0	0.31664	0.250404	0.246285	0.183552	0.724993	0.294168	0	0	0.0881043	0.055175	0	0	0.0957263	0.175095	0.0268278	0.158524	0.185234	0.472342
FBgn0000406	Cyt-b5-r	-2.03597	6.76566e-05	Isolated Up	259.185	61.8907	77.8631	468.304	379.069	41.4984	22.7453	94.5292	172.497	211.682	367.425	326.126	188.829	71.8325	192.317	723.395	718.792	91.9119	153.002	248.027	391.251	22.8037	37.2531	750.075	407.316
FBgn0010052	Jhe	-2.03663	0.0141525	Isolated Up	2.13197	1.63673	1.00314	3.83443	3.97152	0.354039	0	1.63191	1.94063	1.31352	2.24851	1.8729	1.6313	0.956571	0.419907	4.84574	4.22089	0	0.0284655	0.191453	0	1.36822	1.82302	8.21205	7.66243
FBgn0028583	lcs	-2.04803	0.0103563	Isolated Up	5.448	0	0	0.309853	0.253501	0.101154	0	0.608923	0.970315	1.02619	1.37664	1.08749	3.31608	0.0597857	0.0466563	0.851675	1.13109	0	0.056931	0.542449	1.48831	9.04098	0.118893	107.158	1.2071
FBgn0085360	CG34331	-2.05542	1.31101e-08	Isolated Up	22.1972	7.62884	10.8913	32.7669	30.2512	4.1726	0.558168	12.9579	19.688	8.25055	12.3897	29.2112	22.0893	12.5849	20.9487	53.7143	52.2231	8.72798	14.7167	21.5065	34.6251	6.11674	7.5695	64.0601	45.0824
FBgn0039682	Obp99c	-2.0578	6.25606e-10	Isolated Up	563.895	141.231	262.919	523.729	611.53	86.9924	239.733	330.475	712.587	149.249	430.199	675.754	494.149	177.265	586.376	1322.53	1377.94	223.904	359.918	615.967	934.834	85.4198	151.985	1630.68	1408.1
FBgn0052695	CG32695	-2.06484	7.37919e-10	Isolated Up	9.84164	3.1625	5.15903	29.436	20.9984	2.02308	6.46545	5.67516	7.69992	3.2838	7.57151	15.8894	11.1784	2.21207	7.46501	14.919	15.9456	3.36442	6.77479	9.79599	10.7246	1.39505	1.78339	30.9958	12.2809
FBgn0087002	apolpp	-2.06819	3.57089e-09	Isolated Up	1212.45	385.631	471.716	3305.63	3994.67	179.295	151.031	766.658	692.68	304.203	686.024	1125.28	834.608	724.662	929.02	2766.27	2308.3	589.163	1080.44	1478.46	1629.22	329.58	351.328	2517.36	1497.64
FBgn0026754	Ugt37C1	-2.07081	0.0174765	Isolated Up	0.0872221	0	0.0477688	0.193658	0.295752	0.177019	0	0.146142	0.250404	0.082095	0	0.0302081	0.187198	0	0	0.117472	0.0275875	0.0975193	0	0.0638175	0.0437739	0	0.0396309	0.0308724	0.262412
FBgn0262574	CG43114	-2.07352	0.000124391	Isolated Up	5.127	0.887719	2.24513	11.2322	11.1963	0.379327	0	0.998634	2.59794	0.65676	1.92729	6.46452	5.74965	2.45121	8.72473	9.45653	9.68321	2.68178	3.64358	3.86096	9.7178	0.697523	1.86265	11.2375	14.6951
FBgn0014000	Hf	-2.07376	1.07774e-11	Isolated Up	29.7361	9.07138	14.1396	54.1855	62.3191	5.10828	10.7912	17.0986	32.8655	7.67588	24.4124	33.682	26.1542	10.3429	23.9347	69.0444	63.1754	13.8477	18.531	25.0803	37.2516	5.31191	8.40175	81.4104	59.8299
FBgn0050095	CG30095	-2.07742	0.00245583	Isolated Up	0.094227	0.0277412	0	0.154926	0	0.0758655	0	0.121785	0.219103	0.0410475	0.0458879	0.181248	0.160455	0.119571	0	0.293681	0.2207	0.0975193	0	0.0319088	0.175095	0.0268278	0.0396309	0.123489	0.104965
FBgn0030159	CG9689	-2.07898	1.28295e-10	Isolated Up	16.5324	6.99079	7.02201	48.8793	40.8982	1.84606	4.88397	7.7455	8.04422	5.86979	8.44338	10.3916	10.4029	6.2476	8.67807	26.8424	18.0146	9.36185	8.34039	36.2483	32.13	6.76061	9.19437	41.369	32.1717
FBgn0052750	CG32750	-2.0809	0.00648677	Isolated Up	0.743863	0.110965	0.286613	0.852095	1.01401	0.0252885	0	0.170498	0.125202	0.65676	1.33075	0.815617	0.962732	0.0597857	0.233281	0.146841	0.165525	0.195039	0.056931	0.382905	0.437739	0.590212	0.237785	4.16777	4.82838
FBgn0266650	lncRNA:CR45157	-2.08167	0.0466822	Isolated Up	0.114154	0	0	0.0387316	0	0.050577	0	0.0730708	0	0	0.275327	0.120832	0.0802277	0	0.139969	0.323049	0.33105	0.0975193	0	0.542449	0.0437739	0	0.0396309	0.216107	0.367377
FBgn0034440	CG10073	-2.08194	0.00268756	Isolated Up	0.742224	0.0277412	0.143306	0.23239	0.507003	0.177019	0	0.243569	0.219103	0.738855	1.42253	0.755201	0.695306	0.328821	0.279938	1.73272	1.87595	0	0.370052	0.414814	0.700382	0.107311	0.237785	4.66173	1.94185
FBgn0051104	CG31104	-2.08564	0.000588756	Isolated Up	0.650143	0.110965	0	0.348584	0.549253	0.050577	0	0.0487138	0.845113	0.65676	0.367103	2.53748	3.07539	0.4185	0.559875	0.881043	0.8828	0.292558	0.56931	0.893445	0.56906	0.134139	0.198155	0.617447	0.997166
FBgn0032287	CG6415	-2.08653	5.54639e-08	Isolated Up	27.5983	8.0727	12.4199	42.3336	51.7988	4.80481	7.90738	16.3922	32.396	13.9972	42.2628	39.2705	24.8706	5.08178	15.3033	58.6481	56.3889	9.02054	15.4283	31.2706	47.626	1.77064	3.60641	78.601	43.0881
FBgn0034390	CG15093	-2.08789	1.46732e-11	Isolated Up	38.7196	19.2247	23.2634	52.5975	53.1085	12.6948	12.6983	28.5463	45.8865	10.7134	13.2616	53.3172	35.9955	15.8731	25.7076	138.294	123.592	20.1377	27.7823	61.5201	87.679	5.74115	9.07548	33.9287	18.6313
FBgn0037714	CG9396	-2.09901	2.15143e-08	Isolated Up	14.4802	5.79792	6.78316	30.2494	30.7159	3.03462	3.20947	12.1054	18.5612	4.35104	9.95768	20.4509	12.4888	7.29385	11.0575	42.7306	38.1259	7.80154	10.9592	20.5492	30.7292	1.18042	1.10967	12.7194	5.56313
FBgn0031800	CG9497	-2.09961	1.19008e-08	Isolated Up	23.9563	4.71601	10.5569	34.0838	27.6739	3.81856	4.55837	7.64807	15.3685	8.16845	8.44338	32.2924	36.2896	21.0446	20.3421	86.9296	74.2656	13.0188	14.8875	28.7817	46.6629	4.051	6.85615	39.8253	24.6667
FBgn0015570	alpha-Est2	-2.10246	2.40997e-08	Isolated Up	13.5392	4.21667	3.96481	37.6858	45.8415	3.05991	5.20957	3.21511	3.94386	2.66809	8.99403	11.3884	8.77156	4.48393	9.05132	35.4473	25.1322	3.75449	9.39362	17.4222	25.6077	6.1704	6.81652	28.2173	14.4851
FBgn0062961	lncRNA:CR33942	-2.11113	0.0014717	Isolated Up	1.36007	0.582566	1.28976	4.49287	3.80252	0.0252885	0	0.389711	0.187803	0.49257	1.69785	3.50413	3.36956	0.4185	0.746501	0.998516	1.9863	1.02395	0.512379	1.59544	2.23247	0	0.0792618	2.53153	0.682271
FBgn0001208	Hn	-2.11953	5.62211e-11	Isolated Up	138.126	55.3437	49.8228	324.958	254.051	22.5068	18.28	62.5486	79.9414	45.2343	90.1697	193.603	119.031	63.881	103.577	355.883	323.381	61.4859	103.244	174.094	229.944	32.1934	42.0088	344.937	164.9
FBgn0086266	Vm26Ac	-2.12303	0.0216671	Isolated Up	0.053613	0	0	0.0774632	0.169001	0	0	0.0487138	0.0939014	0	0	0.0906242	0.160455	0.0896785	0	0.0587362	0.0827625	0	0.0853965	0	0.0875477	0.0268278	0.0396309	0.123489	0.0524824
FBgn0034480	CG16898	-2.12344	0.0117804	Isolated Up	6.14572	2.52445	2.57951	14.6018	15.2523	0.202308	2.27919	1.60756	2.15973	2.70914	4.77234	4.47079	2.56729	3.3181	8.11819	35.7116	29.2428	1.31651	2.59036	4.7544	5.29664	0.0268278	0	1.08053	0.314894
FBgn0263330	lncRNA:CR43411	-2.14156	3.3753e-10	Isolated Up	3.85397	0.804496	3.91704	6.85549	9.12605	0.885097	1.95359	4.70089	7.82512	0.738855	1.10131	7.31035	5.34851	1.28539	2.37947	8.86917	8.96594	1.46279	2.84655	4.27577	6.74117	0.670696	0.87188	2.03758	1.52199
FBgn0050011	gem	-2.14509	0.0034693	Isolated Up	0.098382	0.0832237	0	0.271121	0.169001	0	0	0.170498	0.375606	0.16419	0.0458879	0.15104	0.0267426	0.0597857	0	0.146841	0.137938	0	0.056931	0.127635	0	0.0536556	0	0.216107	0.104965
FBgn0051954	CG31954	-2.14885	0.000804038	Isolated Up	0.406746	0.305153	0.143306	0.813364	0.845004	0	0	0.170498	0.187803	0.32838	0.183552	0.422913	0.347653	0.0298928	0	0.205577	0.275875	0.487597	0.0284655	1.37208	1.66341	0.268278	0.198155	0.277851	1.2071
FBgn0051778	CG31778	-2.15133	5.79916e-09	Isolated Up	14.5859	5.8534	5.44564	47.3687	37.3914	3.18635	2.83735	5.74823	8.10682	5.58246	6.92907	16.0405	7.5414	6.63621	11.9907	33.0391	30.1256	4.53465	12.6102	11.8701	14.2703	2.81692	3.17047	44.2401	22.7249
FBgn0031417	CG3597	-2.15232	2.71304e-11	Isolated Up	45.0799	20.9446	15.8115	72.0408	93.1195	13.4282	12.6053	20.4355	30.9249	13.5046	45.1537	49.5714	42.7346	14.1094	30.5132	111.217	93.1906	13.8477	25.1635	51.0859	75.5974	5.41922	10.9381	137.691	82.8697
FBgn0085320	CG34291	-2.15443	0.00424051	Isolated Up	1.34327	1.24836	2.00629	6.35198	5.99953	0.354039	0	0.803778	0.719911	0	0.458879	1.23853	0.641821	0.388607	1.07309	1.46841	1.62766	0.341318	0.626241	1.85071	4.37739	0.0536556	0	0.555702	0.0524824
FBgn0034394	CG15096	-2.15497	6.49055e-08	Isolated Up	94.4301	27.0477	33.5814	162.518	139.721	8.72453	5.25608	53.6096	79.0337	61.1608	115.5	111.8	74.8257	25.0801	52.8616	249.834	251.46	41.2994	55.3085	100.321	140.864	14.3261	19.974	247.504	194.71
FBgn0000053	Gart	-2.15531	1.59227e-13	Isolated Up	99.7249	41.6951	36.8775	274.568	122.483	29.3094	31.583	64.7407	111.68	42.7304	89.9862	166.9	69.076	30.4608	55.8476	259.732	234.797	41.0069	47.4805	106.639	142.134	16.7137	23.5408	273.591	79.8257
FBgn0266162	lncRNA:CR44868	-2.15737	0.00529229	Isolated Up	0.143713	0.0832237	0.0955375	0.619706	0.126751	0	0	0.243569	0.0939014	0.082095	0.0458879	0.271872	0	0.0298928	0.0466563	0.234945	0.275875	0.292558	0.056931	0.0319088	0.218869	0	0	0.493958	0.104965
FBgn0010043	GstD7	-2.16576	0.0284104	Isolated Up	0.0876414	0.0277412	0	0.0387316	0.0422502	0.126442	0	0.0730708	0	0	0	0.0302081	0.0534851	0.0597857	0.0933126	0.675466	0.165525	0	0	0.159544	0.0437739	0	0.118893	0.185234	0.20993
FBgn0020908	Scp1	-2.1667	9.03689e-09	Isolated Up	91.2026	30.9869	82.5922	238.664	182.605	37.781	23.4896	187.694	127.017	26.5167	29.1388	137.749	246.031	58.6796	4.61897	70.9827	146.766	40.2755	48.249	139.76	181.53	49.39	6.34095	45.1354	46.8668
FBgn0262540	CG43094	-2.17004	0.000581561	Isolated Up	0.324658	0.0554825	0.0477688	0.929558	0.549253	0.227596	0	0.170498	0.219103	0.0410475	0.321215	0.15104	0.374396	0.20925	0.186625	1.40967	1.02074	0.146279	0.25619	0.0319088	0.175095	0.0804835	0	0.926171	0.262412
FBgn0031925	Cyp4d21	-2.17783	3.6504e-05	Isolated Up	30.7452	6.54693	5.78002	53.0623	46.1795	2.17481	2.0001	22.2622	18.1856	15.3518	20.0071	7.94472	5.48222	14.3486	11.8507	105.901	76.8864	18.7725	20.9221	15.0928	29.1534	15.3992	14.3464	118.704	91.5293
FBgn0262142	lncRNA:CR42868	-2.18107	4.93972e-05	Isolated Up	0.590302	0.110965	0.191075	2.01404	1.94351	0	0	0.755065	1.28332	0.0410475	0.550655	0.604161	0.534851	0.149464	0.979782	0.851675	0.910388	0.341318	0.227724	0.319088	0.744156	0.107311	0.158524	0.771809	0.577306
FBgn0031907	CG5171	-2.18308	2.29032e-12	Isolated Up	23.1947	8.98816	12.7543	44.309	49.8553	3.33808	6.60499	13.0797	21.566	4.0637	14.2253	19.1217	15.1095	8.3401	14.6034	56.9154	50.8162	12.7263	15.1152	35.3549	43.0297	4.13148	6.22205	59.7689	36.6327
FBgn0037162	CG11449	-2.1967	0.0313023	Isolated Up	0.566987	0	0.0477688	0.0387316	0	0	1.44193	0.560209	0.65731	0.410475	0.458879	1.99373	1.95221	0	0	0.323049	0.4414	0.195039	0.170793	0.829628	1.88228	0	0	0.52483	1.67944
FBgn0053307	CG33307	-2.19913	4.3028e-08	Isolated Up	11.0091	3.21798	7.40416	40.7844	37.4337	1.64375	1.11634	4.7496	11.7377	2.75018	5.96543	12.929	8.63785	3.97575	11.5708	20.2934	23.339	4.82721	6.00622	5.23304	10.8121	1.42187	2.41749	18.3691	17.5816
FBgn0035918	Cdc6	-2.20048	0.000231265	Isolated Up	1.27441	0.277412	0.0955375	0.890827	0.676004	0.429904	0	1.14478	0.281704	0.82095	0.688319	0.845826	0.989475	1.28539	0.839813	1.52714	1.07591	0.487597	0.284655	6.73275	8.79855	0.590212	0.118893	0.864426	0.839718
FBgn0264961	asRNA:CR44130	-2.20107	0.0352471	Isolated Up	0.0539659	0.0277412	0	0.0774632	0.0422502	0	0	0.0243569	0.187803	0	0	0.0906242	0.0534851	0.0597857	0	0.0587362	0	0.146279	0	0.0957263	0.218869	0.0268278	0	0.185234	0
FBgn0014031	Agxt	-2.20145	1.09226e-12	Isolated Up	62.9261	20.0014	20.7794	137.342	128.567	23.0378	24.0943	20.9226	44.8536	17.8146	39.6472	118.204	51.5329	20.9848	53.2815	152.332	112.364	26.379	31.6252	61.2329	110.529	8.82635	14.5445	171.928	99.4017
FBgn0050042	Cpr49Ab	-2.20166	0.000244428	Isolated Up	0.652814	0.249671	0.0477688	0.7359	0.887255	0	0	0.389711	0.62601	0.697808	0.412991	1.81248	3.63699	0.179357	0.139969	0.46989	0.386225	0.731395	0.398517	0.829628	1.75095	0.0536556	0.277416	0.586575	0.367377
FBgn0266829	lncRNA:CR45291	-2.20536	0.0158374	Isolated Up	0.0813239	0	0.0955375	0.309853	0.169001	0	0	0.0243569	0.156502	0.082095	0	0.15104	0.0802277	0	0	0.0293681	0.0827625	0	0	0.0319088	0.131322	0.0268278	0.198155	0.277851	0.104965
FBgn0283461	Drs	-2.21279	0.00139494	Isolated Up	26.9877	5.74243	14.7128	3.7957	2.07026	5.10828	13.1635	11.1311	3.09875	12.2322	18.6764	176.898	16.2327	7.05471	19.3624	4.43458	6.31754	6.14372	10.7315	46.6825	182.712	7.324	7.49024	36.8307	29.7575
FBgn0262353	CG43051	-2.23599	6.20416e-05	Isolated Up	0.462934	0.0277412	0.525456	1.39434	2.36601	0.32875	0	0.487138	0.406906	0	0.22944	0.634369	0.989475	0.0896785	0.37325	0.234945	0.193113	0.0975193	0.313121	0.446723	0.56906	0.0804835	0.118893	0.679192	0.524824
FBgn0265318	asRNA:CR44291	-2.23848	0.00179215	Isolated Up	0.897576	0.138706	0.0955375	0.0387316	0.0422502	0.0758655	0	0.511495	0.187803	0.082095	0.0917758	0.120832	0.508109	0.239143	0.0933126	0.205577	0.193113	0.0487597	0.0284655	0.414814	0.131322	6.03626	5.46907	2.74764	4.04115
FBgn0050029	CR30029	-2.24169	0.0493951	Isolated Up	0.0803594	0.110965	0.0477688	0	0	0	0	0.0487138	0.062601	0	0	0.0604161	0	0.149464	0.0466563	0.234945	0.11035	0	0	0.25527	0.393965	0	0	0.0926171	0.314894
FBgn0286508	Had1	-2.24235	5.90777e-20	Isolated Up	115.727	46.0227	43.9473	147.451	241.502	32.1417	49.1653	73.8502	141.822	25.6136	56.7175	155.632	97.3696	36.0209	69.8911	286.398	296.786	67.3371	54.853	138.005	196.151	19.5038	37.9664	279.024	184.266
FBgn0034276	Sardh	-2.24238	2.34068e-05	Isolated Up	15.3967	4.05022	3.34381	45.5484	20.9561	6.27155	4.09323	13.2502	22.1607	8.2095	16.4279	19.9675	11.7132	8.10096	14.5101	58.7656	61.3546	2.5355	1.50867	4.85013	6.78495	1.1536	1.34745	26.0563	6.5603
FBgn0030270	CG15199	-2.24831	2.00278e-09	Isolated Up	3.92062	1.10965	2.2929	5.65481	6.54878	0.986251	4.51186	3.31254	4.78897	0.65676	2.34028	2.68852	3.34282	0.896785	2.09953	13.3038	11.2557	0.975193	1.19555	2.96751	4.81512	0.37559	0.792618	9.41607	7.7674
FBgn0031913	CG5958	-2.25012	2.61794e-10	Isolated Up	25.8695	11.2907	14.7128	36.8725	42.8417	3.86914	2.04662	12.0323	17.81	6.97808	20.3283	36.4611	22.5172	8.01128	15.9098	37.5618	33.6568	10.142	12.5533	31.6535	55.6803	4.56073	9.94736	109.35	64.081
FBgn0086691	UK114	-2.25443	8.32218e-12	Isolated Up	29.5137	8.79397	13.8052	48.5307	45.8415	4.50135	4.55837	13.2258	24.0388	4.43313	21.6591	48.635	29.3633	10.044	22.9082	68.8388	66.9825	16.3832	14.6882	38.2905	46.0939	5.90212	8.63954	91.9996	50.1732
FBgn0265717	lncRNA:CR44524	-2.25552	0.0187844	Isolated Up	0.0744901	0	0	0.271121	0.0422502	0	0	0.0974277	0.438207	0.0410475	0	0	0.10697	0.0896785	0	0.0881043	0.0827625	0.0487597	0.113862	0.191453	0.0875477	0.0268278	0	0.0617447	0
FBgn0029828	CG6067	-2.25893	2.33332e-10	Isolated Up	30.4822	9.43202	9.45821	67.8578	66.8398	3.84385	5.25608	13.4937	22.5363	7.67588	23.2193	37.1861	25.0578	11.8376	23.1882	69.5437	62.9823	14.2378	19.6412	25.0803	36.1572	4.66804	8.2036	107.652	56.5235
FBgn0041194	Prat2	-2.25933	3.64606e-12	Isolated Up	118.577	47.9091	54.122	218.717	170.522	11.1775	22.4663	55.7773	79.6284	25.6136	69.9332	244.564	103.039	48.6954	69.8911	237.441	212.369	60.8033	69.3989	139.377	216.418	35.3322	31.4669	454.595	166.579
FBgn0034885	Eglp4	-2.26061	1.08185e-21	Isolated Up	116.12	45.135	59.0899	206.672	225.109	18.1571	35.4902	82.229	138.004	37.189	74.2008	162.429	118.79	35.1839	68.4448	262.257	233.418	46.1754	57.3011	136.378	215.367	24.1987	33.1314	269.423	203.107
FBgn0039239	CG13641	-2.2987	1.70827e-08	Isolated Up	2.10875	0.665789	2.00629	1.97531	1.39426	0.733366	0	1.51013	2.69184	0.533618	1.23897	3.35309	2.64751	0.478285	1.53966	4.0528	4.1933	0.926433	1.02476	4.40341	4.81512	0.134139	0.317047	6.1436	3.83122
FBgn0040257	Ugt302E1	-2.30536	0.000161872	Isolated Up	0.346407	0.305153	0.0477688	1.04575	1.30976	0.101154	0	0.63328	0.0939014	0.205238	0.596543	0.845826	0.454623	0.0298928	0.0933126	0.352417	0.358638	0.0975193	0.056931	0.25527	0.262643	0.0536556	0	0.957043	0.157447
FBgn0039324	CG10553	-2.31341	1.55671e-08	Isolated Up	28.3645	7.46239	12.2288	44.4639	44.0247	1.66904	4.6514	7.08786	6.5105	21.3037	16.5196	97.0283	97.6906	12.4055	12.2239	46.8421	34.9258	11.7511	8.9097	26.931	25.5639	8.96049	10.5418	71.5621	49.4909
FBgn0040606	CG6503	-2.33796	1.78281e-12	Isolated Up	150.146	41.0848	70.5545	319.148	340.241	17.1456	30.7458	89.7553	102.259	30.5393	75.2103	262.236	181.983	52.9701	143.048	356.382	332.402	61.4859	92.6552	173.488	248.066	17.5722	28.4154	293.38	242.731
FBgn0023496	Lip1	-2.33976	1.95934e-05	Isolated Up	0.601523	0.277412	0.286613	1.82039	1.85901	0.303462	0.325598	1.87548	1.59632	0	0.367103	0.483329	0.882504	0.179357	0.0466563	0.939779	1.21385	0.390077	0.426983	0.25527	0.262643	0	0.0396309	0.185234	0.419859
FBgn0038820	CG4000	-2.34532	3.63223e-05	Isolated Up	217.3	15.6738	31.0975	105.582	85.0497	30.8014	42.3277	43.2335	26.0107	102.988	47.1728	346.607	236.27	90.0073	86.1742	366.25	328.65	248.333	105.379	765.395	1224.53	74.2058	69.79	385.318	358.35
FBgn0264343	CG43799	-2.35348	0.00490764	Isolated Up	0.0925254	0	0	0	0.126751	0.050577	0	0.31664	0.156502	0	0.0917758	0.0906242	0.0534851	0.0896785	0	0.264313	0	0	0.0284655	0.159544	0.175095	0.0804835	0.0396309	0.339596	0.157447
FBgn0037975	CG3397	-2.35779	0.0249685	Isolated Up	11.2491	0.0277412	0	0	0	1.94721	3.06992	5.84566	12.2698	0.533618	1.74374	1.90311	3.04865	4.72307	12.2239	43.2299	40.6364	7.60651	11.0446	14.5504	28.3655	2.09257	3.76494	43.2213	28.1306
FBgn0030073	CG10962	-2.35789	3.74009e-08	Isolated Up	3.43422	1.94189	2.19736	13.4786	16.9001	2.30125	0.69771	2.75233	3.66216	0.697808	2.06496	4.16871	3.63699	0.986464	0.746501	1.99703	2.04148	1.41403	0.56931	1.24444	2.23247	0.482901	1.07003	10.4657	4.67093
FBgn0037801	CG3999	-2.35829	2.61486e-08	Isolated Up	10.2668	5.3818	2.05406	27.5382	14.3228	1.39087	1.62799	1.94855	3.84996	3.69428	8.12216	13.8051	5.05434	2.83982	7.18507	20.0584	19.7802	3.2669	4.58295	14.9333	17.816	1.36822	3.60641	51.1555	11.0213
FBgn0032770	CG13086	-2.35978	1.17297e-08	Isolated Up	5.73245	3.32895	2.72282	13.2849	12.5061	0.657501	1.20936	2.80105	3.47435	0.205238	4.45113	6.31348	5.45548	1.04625	3.49922	14.2435	14.6214	2.43798	3.58665	4.94586	7.74797	0.643868	1.26819	16.5785	10.549
FBgn0038398	sxe2	-2.36614	4.95581e-07	Isolated Up	54.5433	8.90493	7.97738	99.8113	88.979	7.78886	3.34901	19.8996	21.1591	19.7849	25.0089	41.959	22.0893	27.7405	23.7481	195.709	162.077	20.0402	39.1401	38.3543	63.1657	22.5622	30.3969	184.462	134.932
FBgn0040531	CG11741	-2.36761	0.000689231	Isolated Up	2.11975	0.998684	3.00943	15.3764	10.0978	0.151731	0	0.462781	0.751211	0.082095	0.321215	0.15104	0.374396	0.567964	1.07309	3.08365	2.48288	0.438837	1.45174	1.40399	1.92605	0.348762	0.673725	2.13019	3.51632
FBgn0020385	pug	-2.37772	1.06468e-12	Isolated Up	146.175	42.6937	43.6129	374.999	275.302	42.0042	44.2813	86.7837	173.905	62.9669	128.578	233.478	113.442	38.9504	78.8958	409.773	349.589	50.8563	69.342	136.41	220.095	12.4213	16.3279	385.565	117.928
FBgn0286919	CR46419	-2.39979	1.80205e-08	Isolated Up	0.468248	0.194189	0.143306	0.580974	0.211251	0.177019	0	0.681994	0.751211	0.16419	0.321215	0.996866	1.87198	0.0597857	0	0.323049	0.634513	0.292558	0.142328	1.18062	0.831703	0.268278	0.237785	0.64832	0.524824
FBgn0040732	CG16926	-2.40119	0.00158829	Isolated Up	38.3687	5.0489	3.15274	15.4152	16.6043	8.09232	6.37242	48.2998	78.752	6.97808	14.73	14.1978	6.89958	30.1021	71.5241	261.964	233.087	3.85201	9.25129	10.0513	15.2333	1.28774	1.18893	35.9354	22.8298
FBgn0011705	rost	-2.40737	2.09588e-13	Isolated Up	13.671	3.46765	3.8215	32.6507	50.489	4.67837	3.67461	4.94445	3.25525	4.35104	5.04767	19.0613	20.9929	4.81275	6.06532	23.5532	13.6282	7.80154	6.37627	19.592	16.3276	3.83638	4.51792	43.2213	21.9376
FBgn0028526	CG15293	-2.41573	1.99733e-10	Isolated Up	100.656	25.7439	31.0497	164.532	159.833	10.6465	14.4659	41.4555	62.5384	33.5358	74.522	107.933	62.9787	34.6458	61.9129	318.761	315.546	37.8863	70.5091	129.007	173.301	12.8237	16.3676	306.902	148.84
FBgn0052667	ssp7	-2.42609	9.36412e-15	Isolated Up	36.5348	8.98816	20.254	69.6781	101.401	5.63933	11.582	22.1404	32.8968	7.06017	14.6382	44.6475	37.8407	11.4788	33.8725	89.8958	78.1278	11.9461	15.9976	38.833	75.4224	4.26562	7.21283	68.5675	64.4484
FBgn0027348	bgm	-2.45717	1.46732e-11	Isolated Up	47.7594	15.9235	11.5123	78.5477	46.4752	9.35674	5.3026	16.5871	25.729	15.7622	31.2038	68.8442	41.3975	14.0795	21.4619	87.8694	83.0384	24.0873	19.6127	37.6204	68.2872	13.6285	16.0901	247.751	146.059
FBgn0030607	dob	-2.4618	1.60291e-09	Isolated Up	14.5232	2.05285	3.58266	34.4324	38.7012	3.54039	1.16285	6.40587	12.082	5.95189	8.39749	12.2343	10.0017	5.35082	11.944	53.8024	44.4986	5.8024	8.0842	8.36009	17.6409	1.58284	2.33822	33.4965	17.1093
FBgn0025620	CG13360	-2.46243	1.09866e-12	Isolated Up	36.0428	11.79	18.8209	50.7384	57.4603	5.2853	13.6286	15.9538	18.8429	16.6653	6.51608	105.184	123.123	22.0908	19.8289	62.2016	56.4716	14.3353	11.5001	70.5184	79.362	5.17777	3.52715	37.3247	38.6795
FBgn0013276	Hsp70Ab	-2.47038	0.000105713	Isolated Up	4.14603	1.10965	0.907606	7.86251	8.7458	1.23914	0.093028	0.94992	0.845113	1.47771	2.6615	13.1405	7.24723	0.597857	0.746501	0.587362	0.386225	2.68178	4.09903	4.18005	4.07097	0.804835	0.752987	13.9543	20.3632
FBgn0033041	Or42a	-2.47096	0.0218485	Isolated Up	0.0519484	0.0554825	0	0.0387316	0.0422502	0	0	0	0.344305	0	0.0458879	0.0302081	0.160455	0.0298928	0.0466563	0.0293681	0.0275875	0	0.0284655	0.0638175	0.0875477	0	0	0.216107	0
FBgn0029765	CG16756	-2.47122	5.32618e-11	Isolated Up	20.7593	5.13213	7.30862	42.6048	55.6435	1.9725	1.11634	14.5654	18.3421	2.91437	7.43384	29.7549	18.5326	12.4354	20.1089	43.3767	35.8638	5.99744	9.56441	16.784	25.9579	4.42659	6.26168	65.5729	46.5519
FBgn0029848	Btnd	-2.48006	0.0242217	Isolated Up	0.130166	0	0.0477688	0.0387316	0.126751	0.050577	0	0.170498	0	0.123143	0	0.15104	0.294168	0	0	0.0587362	0.055175	0	0.170793	0	0	0.0804835	0.0396309	0.246979	1.46951
FBgn0034364	CG5493	-2.50841	1.75174e-14	Isolated Up	23.4183	7.01853	13.9962	57.3228	48.63	3.81856	3.67461	12.6412	23.0059	4.22789	11.6555	32.7455	19.3081	5.58996	13.437	59.0005	53.8232	8.0941	14.5174	20.1982	30.0726	3.59493	4.16125	70.8829	40.6214
FBgn0050489	Cyp12d1-p	-2.51016	5.57091e-05	Isolated Up	4.93383	1.08191	0.620994	2.44009	1.85901	0.101154	1.11634	0.389711	0.907714	0.82095	2.84505	6.22286	4.11835	2.78003	3.3126	16.2406	19.7251	1.41403	3.58665	5.55212	5.29664	0.643868	1.50597	25.9637	9.86669
FBgn0033139	Tsp42Er	-2.52426	2.08107e-05	Isolated Up	0.485677	0.0554825	0	0.774632	0.760504	0.050577	0	0.292283	0.250404	0	0.137664	0.422913	0.133713	0.298928	0.326594	0.763571	0.855213	0.0487597	0.483914	1.11681	1.0068	0.134139	0.356678	2.28455	1.10213
FBgn0034140	Lst	-2.5244	2.02714e-11	Isolated Up	46.9724	13.6209	12.8498	144.391	98.0628	10.4947	5.58168	19.1202	33.2098	8.61998	25.376	77.6045	58.272	5.76932	12.2706	64.2574	75.4518	30.2797	48.0782	63.9451	86.6285	6.49233	7.49024	159.116	60.3548
FBgn0038257	smp-30	-2.53659	2.33112e-30	Isolated Up	52.4586	9.82039	15.2382	92.1425	104.485	8.97742	14.838	52.7571	111.743	8.04531	21.1084	63.3463	45.0612	19.7592	28.5536	104.169	95.0941	15.213	23.2848	73.0711	92.8443	17.1966	22.3518	139.975	79.9307
FBgn0037562	Nazo	-2.55415	0.0101305	Isolated Up	0.27922	0.110965	0.0477688	0.193658	0.338002	0	0	0	0	0.246285	0.0458879	0.0604161	0.481366	0.0896785	0.279938	0.205577	0.358638	0	0.170793	0	0.0437739	0.0804835	0.0396309	2.43892	1.46951
FBgn0031860	Daao2	-2.56207	2.02714e-11	Isolated Up	12.9304	4.16118	4.72911	23.3164	24.0404	1.23914	2.41873	8.79285	17.7161	2.4218	5.46066	13.8655	7.14026	3.61703	8.81804	40.4986	38.5122	4.19333	10.9592	14.8376	23.6817	0.938974	1.07003	32.2616	15.6398
FBgn0032076	Argl	-2.5647	2.29696e-19	Isolated Up	43.5374	14.6751	16.1936	73.2027	93.0772	12.5937	12.5588	22.8955	38.2492	8.90731	23.9076	55.462	30.9679	11.15	22.9082	127.604	105.495	14.5304	16.937	51.2455	74.8533	6.1704	8.79806	139.327	63.1888
FBgn0028396	TotA	-2.56624	0.00221581	Isolated Up	54.5337	2.63542	3.86927	8.28856	8.53454	5.2853	6.00031	14.0052	25.8229	43.5924	79.7532	295.344	353.67	14.0496	18.9425	130.894	122.902	4.43713	35.4111	41.7686	65.7046	0.751179	0.713356	18.2456	8.18726
FBgn0085195	CG34166	-2.56765	2.37517e-06	Isolated Up	111.231	14.37	23.6455	197.144	197.562	5.63933	7.07013	119.13	178.82	16.8705	62.7747	190.673	174.495	61.6988	131.757	351.977	350.83	28.4756	62.5956	93.8756	148.919	4.90949	6.61836	171.311	68.3846
FBgn0034629	Acox57D-d	-2.56853	6.5429e-05	Isolated Up	9.26004	4.38311	5.30233	53.8757	65.9948	0.404616	0.23257	1.14478	1.37722	4.88465	6.37842	7.64264	5.34851	2.8996	3.21928	10.6019	7.69691	2.48674	2.96041	6.5732	10.1993	1.12677	1.46634	9.32345	6.71775
FBgn0259918	inaF-B	-2.56975	1.34746e-07	Isolated Up	19.8299	4.24441	2.53174	73.7062	64.6006	2.55414	3.16295	19.6073	6.8548	5.13094	4.58879	9.18325	1.71152	6.51664	6.48522	44.9626	36.1396	8.14286	2.53343	35.2592	48.195	11.9116	17.715	36.6146	23.5646
FBgn0287423	Nplp2	-2.57657	5.55383e-11	Isolated Up	698.958	113.711	289.479	1643.89	1831.12	39.0454	99.3539	383.573	558.588	69.6987	331.953	841.657	588.871	233.045	552.597	1632.87	1554.42	266.13	490.916	823.246	1267.21	67.8207	118.338	1758.67	1218.8
FBgn0000592	Est-6	-2.57731	4.46589e-16	Isolated Up	100.317	22.4427	29.0912	182.387	215.054	10.0395	38.4671	57.6041	74.8707	59.9294	64.1972	173.908	183.026	32.9718	36.5785	191.48	174.243	19.4551	27.8108	74.6346	90.0866	23.5548	23.1841	367.844	234.754
FBgn0266869	asRNA:CR45330	-2.61044	0.000992111	Isolated Up	0.173685	0.0554825	0	0	0.126751	0	0	0.0730708	0	0.082095	0.0458879	0.181248	0.21394	0.149464	0.0466563	0.734203	0.634513	0.0975193	0.113862	0.51054	0.481512	0.0536556	0	0.463085	0.104965
FBgn0030594	fiz	-2.61228	0.000364542	Isolated Up	2.6509	0.499342	0.191075	0.96829	0.802754	0.126442	0	0.584566	0.187803	1.23143	2.15673	2.35623	2.67426	1.58432	1.77294	18.59	14.2352	0.438837	1.11015	4.69059	4.42116	0.268278	0.594464	2.56241	1.57447
FBgn0264267	asRNA:CR43767	-2.64804	0.000151311	Isolated Up	0.246203	0.0277412	0.143306	0.0387316	0	0	0	0.730708	0.688611	0	0.321215	0.634369	0.347653	0.0298928	0.186625	0.411153	0.33105	0.0487597	0.056931	0.319088	0.306417	0.107311	0	0.339596	0.839718
FBgn0284081	CG46303	-2.66488	0.0158716	Isolated Up	0.133322	0.0277412	0.0955375	0.154926	0	0	0	0	0	0.123143	0	0.0906242	0	0	0.0933126	0.205577	0.193113	0	0.0284655	0.0319088	0.306417	0.0804835	0.0396309	0.679192	1.04965
FBgn0032726	CG10621	-2.66866	5.81512e-07	Isolated Up	43.2188	18.0318	28.5657	89.2376	105.71	1.66904	2.37221	15.5641	26.7619	2.05238	4.5429	60.0234	42.1463	24.4523	37.2317	172.978	104.446	14.2866	15.8268	69.8483	72.8397	4.13148	4.12161	81.6265	38.7845
FBgn0266168	lncRNA:CR44874	-2.67034	0.00193597	Isolated Up	0.313035	0	0	0.23239	0.253501	0	0	0.365354	0.344305	0.410475	0.22944	0.483329	0.481366	0.0896785	0.419907	1.87956	1.51731	0	0.0284655	0.159544	0.306417	0	0	0.154362	0.157447
FBgn0044812	TotC	-2.67728	0.0102665	Isolated Up	17.2921	0.0832237	0.143306	1.4718	1.56326	0.83452	0.418626	2.55748	5.03938	19.3744	25.3301	102.164	162.595	3.04907	5.92535	19.9116	22.3183	0.390077	8.9951	7.08374	16.5465	0.187795	0.118893	5.86575	3.04398
FBgn0031558	CG16704	-2.68122	5.55383e-11	Isolated Up	9.84913	1.10965	3.24828	23.5875	18.9703	0.960963	5.07003	5.43159	10.1101	0.246285	4.03814	18.8498	10.4563	2.42132	8.77138	24.1993	25.5736	3.12062	4.24136	9.95553	18.7352	1.01946	1.22856	23.8026	11.2312
FBgn0026755	Ugt37B1	-2.69981	0.012877	Isolated Up	4.38339	0.0832237	0	2.40136	1.18301	0.0252885	0	0.31664	0	2.83228	3.53337	1.29895	0.588336	2.54089	2.70606	27.0187	25.3805	0.195039	2.70422	1.49971	2.32001	0.536556	0.554833	18.2456	9.2369
FBgn0035788	CG8541	-2.70241	0.0451284	Isolated Up	0.0609431	0.0554825	0	0	0.0422502	0	0	0.0487138	0.813812	0	0.0458879	0.15104	0.0802277	0.0298928	0.0466563	0	0.0275875	0	0.0284655	0	0	0	0	0.0926171	0
FBgn0035468	Gr63a	-2.70948	2.44107e-06	Isolated Up	0.456204	0.249671	0.286613	0.154926	0.169001	0	0	0.511495	0.313005	0.123143	0.275327	1.35936	1.04296	0.149464	0.0466563	0.675466	0.855213	0.146279	0.199259	0.191453	0.350191	0.0536556	0.118893	1.42013	2.25674
FBgn0262569	CG43109	-2.71086	1.17178e-06	Isolated Up	0.268585	0.0832237	0.143306	0.154926	0.380252	0.177019	0	0.267926	0.250404	0.123143	0	0.211456	0.534851	0	0.0933126	0.264313	0.275875	0.0487597	0.170793	0.191453	1.18189	0.0536556	0.0396309	0.802681	0.997166
FBgn0017424	asRNA:CR11538	-2.73936	0.0214406	Isolated Up	0.547756	0	0	0.0387316	0.676004	0	0.046514	0.170498	0.375606	0.0410475	1.83552	1.1177	1.73827	0	0	2.1145	0.496575	0	0	0.191453	0.744156	0	0	2.56241	0.997166
FBgn0024740	Lip2	-2.77632	1.23853e-09	Isolated Up	2.62049	0.887719	0.955375	7.90125	8.9148	0.758655	0.604682	3.53175	4.41337	0.65676	0.596543	2.47706	1.71152	0.807107	1.07309	9.13348	8.41419	0.877674	1.651	1.27635	1.8385	0.107311	0	3.14898	1.15461
FBgn0082923	snoRNA:Or-aca3	-2.80488	0.0107973	Isolated Up	0.0490393	0	0	0.116195	0.126751	0.0252885	0	0.0974277	0.0313005	0	0	0.0302081	0.0534851	0	0.0933126	0.0293681	0	0.0487597	0	0.0957263	0	0	0	0.0617447	0.367377
FBgn0029990	CG2233	-2.83827	6.16339e-12	Isolated Up	733.2	207.227	268.269	2682.47	2523.1	54.4714	55.7703	302.903	424.466	225.966	520.552	1397.36	766.228	164.859	344.79	1726.79	1559.63	170.171	287.587	526.622	915.092	50.5973	66.8573	1589.09	765.928
FBgn0010241	Mdr50	-2.83853	0.00148255	Isolated Up	3.99923	0.360636	0.668763	1.20068	0.633753	0.455193	0.418626	0.340997	0.187803	1.35457	4.72646	6.7364	4.76017	0.0896785	0.139969	0.411153	0.744863	0.731395	1.11015	0.670084	1.05057	1.42187	1.94191	45.0428	20.783
FBgn0031559	CG3513	-2.83916	5.3598e-08	Isolated Up	0.85464	0.859978	0.143306	0.929558	0.633753	0	0.46514	0.414068	0.62601	0.246285	0.321215	2.05415	1.09644	0.119571	0.0466563	1.52714	1.90354	0.195039	0.199259	0.701993	0.787929	0.0804835	0.198155	4.59998	2.36171
FBgn0083974	CG34138	-2.84123	1.52903e-09	Isolated Up	3.4104	0.194189	0.955375	2.2077	4.26727	0.531058	0	7.50193	7.35561	1.51876	1.83552	4.16871	3.74396	0.119571	0.746501	2.1145	3.9726	2.5355	1.79333	11.4552	7.48533	0.295106	0.634095	7.81071	8.60711
FBgn0263617	lncRNA:CR43626	-2.89665	0.00411909	Isolated Up	0.068515	0.0554825	0	0	0.169001	0	0	0.0487138	0.0313005	0	0	0.120832	0.320911	0	0	0.0293681	0.0275875	0.146279	0	0.159544	0.175095	0.0268278	0	0.123489	0.20993
FBgn0043783	CG32444	-2.90061	5.19257e-19	Isolated Up	229.703	45.1905	90.7129	424.886	860.975	22.6079	51.1654	160.951	255.443	45.1933	87.6	187.169	163.397	70.7862	132.131	766.419	532.246	45.5415	50.327	175.785	294.511	35.8688	49.8557	604.759	359.347
FBgn0034293	CG14495	-2.93132	3.36129e-09	Isolated Up	2.20646	0.471601	0.907606	6.81676	4.94328	0.177019	0	1.16913	0.65731	0.574665	0.550655	1.05728	0.935989	0.926678	0.37325	5.72678	2.40011	0.633876	0.0853965	7.11565	5.82192	1.04629	1.0304	6.6993	2.83405
FBgn0266406	asRNA:CR45046	-2.98608	1.68229e-05	Isolated Up	3.46444	0.0832237	0.286613	12.8202	5.28128	0.0758655	0	0.998634	1.06422	0.32838	0.596543	1.96352	3.44979	0.4185	1.25972	4.37585	4.1933	2.58426	3.64358	6.28603	7.92307	0.134139	0.990773	11.2684	13.1206
FBgn0043577	PGRP-SB2	-3.02033	0.0457737	Isolated Up	0.439505	0.0554825	0.0477688	0	0	4.07145	2.88387	1.82677	1.28332	0	0	0.0604161	0.133713	0	0	0.0293681	0.0275875	0.0975193	0	0	0	0	0	0.0308724	0
FBgn0024289	Sodh-1	-3.02215	6.43174e-20	Isolated Up	113.366	25.3555	30.5242	123.476	188.225	12.4925	11.6285	75.6039	184.798	16.2959	70.3462	197.561	115.18	22.599	54.2146	429.949	341.809	27.2079	35.525	142.217	231.651	9.89947	16.9224	238.952	118.348
FBgn0085351	inaF-A	-3.06371	0.00555069	Isolated Up	0.142473	0	0	0.96829	0.971755	0	0	0.0487138	0.125202	0	0	0.0302081	0	0.0298928	0	0.234945	0.137938	0	0.113862	0.0957263	0.0437739	0.214623	0	0.246979	0.157447
FBgn0040349	CG3699	-3.06982	2.82757e-16	Isolated Up	48.7886	13.4545	19.3463	66.5022	113.484	4.1726	5.67471	21.7264	55.3705	6.40341	8.58104	26.7341	17.8908	9.02764	20.3421	180.731	138.489	21.0642	17.1078	74.8899	137.931	5.0168	9.35289	136.332	61.2994
FBgn0026565	Ass	-3.08043	3.82093e-07	Isolated Up	5.45062	0.832237	1.43306	18.3588	24.1249	0.0252885	0	1.63191	2.78574	1.76504	3.94636	7.15931	4.8404	0.777214	2.00622	9.04538	5.90373	1.36527	1.50867	3.03133	5.42796	0.670696	1.22856	21.6107	11.3362
FBgn0053301	CG33301	-3.12524	1.70289e-07	Isolated Up	1.06814	0.138706	0.429919	0.7359	0.845004	0.0252885	0.837252	0.681994	0.62601	0	0.412991	0.93645	0.829019	0.119571	0.466563	5.81489	4.91058	0.292558	0.199259	1.34017	3.32681	0	0.0792618	1.32751	1.25958
FBgn0053192	MtnD	-3.1291	1.68214e-05	Isolated Up	0.313881	0.138706	0.0955375	0.116195	0.0422502	0.177019	0	0.901206	0.751211	0	0.0458879	2.38644	0.160455	0.0298928	0.0466563	0.146841	0.137938	0	0.199259	0.223361	0.437739	0.107311	0	0.864426	0.524824
FBgn0061356	Hao	-3.13934	1.56462e-20	Isolated Up	34.283	7.12949	11.4645	64.4881	75.6701	3.23693	4.0002	13.3232	23.5693	4.59732	12.4815	42.8652	34.2572	7.68246	12.9238	131.657	92.0043	9.75193	12.2402	38.4181	58.3506	3.46079	5.3898	106.386	47.4441
FBgn0053510	CG33510	-3.16203	0.00629448	Isolated Up	0.0681318	0.0277412	0	0.271121	0.380252	0	0	0	0.125202	0	0	0	0.160455	0.0597857	0	0.205577	0.165525	0	0.0284655	0.127635	0.0437739	0	0.0396309	0	0
FBgn0028878	CG15269	-3.1959	0.00325455	Isolated Up	0.0566992	0.0277412	0	0	0.0422502	0	0	0	0.0313005	0	0.0458879	0.271872	0.294168	0	0	0.176209	0.055175	0	0.056931	0.0957263	0.0875477	0	0	0.123489	0.0524824
FBgn0002562	Lsp1alpha	-3.21004	0.0212922	Isolated Up	0.521819	0.0277412	0	0.23239	0.211251	0	0	3.58047	3.91256	0	0.0458879	0.664577	0.10697	0	0.326594	0.0587362	0	0	0.0284655	0	0	0.751179	0.0792618	2.13019	0.367377
FBgn0039666	Diedel	-3.21539	0.036087	Isolated Up	0.489192	0	0	0	0.169001	0	0	0.0243569	0	0.944093	0	4.44058	4.06487	0.119571	0.139969	0.0881043	0.137938	0	0.170793	0.0319088	0.131322	0	0	0.64832	0.629789
FBgn0262140	CG42866	-3.24975	0.00537263	Isolated Up	0.0781173	0	0	0	0.126751	0.0758655	0	0.0487138	0	0	0	0.0604161	0	0	0	0.146841	0.11035	0	0.056931	0.319088	0.612834	0.0268278	0	0.185234	0.104965
FBgn0053459	CG33459	-3.2653	3.80692e-05	Isolated Up	0.906772	0.360636	0.7643	4.29921	5.66153	0.227596	0	0.63328	0.62601	0.123143	0	0.332289	0	0.328821	0.0933126	1.67398	1.46214	0.0487597	0.142328	0.0319088	0.0437739	0.107311	0.118893	2.53153	2.15178
FBgn0037488	CG14607	-3.35863	0.000210851	Isolated Up	0.269995	0	0	0.426048	0.760504	0	0	0.243569	0.125202	0	0	0.0604161	0.21394	0.478285	0	1.02788	0.165525	0	0.0853965	0.542449	1.40076	0.0268278	0	0.555702	0.367377
FBgn0039685	Obp99b	-3.45877	2.95287e-11	Isolated Up	90.6038	10.7913	19.012	173.672	101.781	8.77511	42.5603	74.654	218.916	10.2619	23.4946	115.546	41.0498	8.48956	57.7138	267.837	309.587	8.19162	7.91341	32.0683	61.1959	1.9316	3.92346	349.135	225.989
FBgn0031940	CG7214	-3.46305	1.27602e-05	Isolated Up	107.121	13.0106	17.1968	34.0451	15.8438	3.84385	5.67471	18.56	3.06745	30.3341	20.053	322.018	219.744	9.86464	16.9829	22.9952	17.2422	70.5552	16.7093	669.382	973.093	11.5628	21.5196	20.3449	17.2667
FBgn0039670	CG7567	-3.52487	0.000461075	Isolated Up	0.0748111	0	0	0.154926	0.338002	0	0	0.146142	0.187803	0	0	0	0	0.0298928	0.0933126	0.264313	0.193113	0.0487597	0	0.0319088	0.131322	0	0	0.123489	0.0524824
FBgn0026563	CG1979	-3.55909	3.55928e-14	Isolated Up	5.71666	1.22061	1.05091	7.70759	22.4349	0.429904	0	4.5791	8.38853	0.697808	2.43206	8.48846	17.5699	0.836999	1.493	23.9644	15.0904	0.682635	2.3911	3.09515	2.23247	0.402417	0.554833	7.62547	3.83122
FBgn0038074	Gnmt	-3.71097	7.41576e-14	Isolated Up	55.8885	12.2894	14.7128	146.212	124.089	6.29683	11.4424	58.1156	83.4158	1.27247	11.2425	60.3557	24.416	3.04907	17.8227	153.536	251.653	10.4833	13.635	15.6672	23.5066	3.35348	1.94191	219.811	73.003
FBgn0267161	asRNA:CR45601	-3.73903	1.22241e-05	Isolated Up	6.64125	5.40954	4.44249	15.9187	36.5887	0.32875	0	0.462781	0.187803	0.574665	0.367103	8.09576	19.3884	0.298928	0.139969	7.51824	0.275875	0.390077	0.0853965	15.5396	16.1088	0.214623	0.673725	13.5221	12.8582
FBgn0286723	hll	-3.75022	1.5076e-06	Isolated Up	5.70218	1.7477	0.573225	25.1755	3.29552	0.783943	0	0.170498	0.751211	2.25761	2.38617	38.9684	14.7619	0.567964	1.35303	5.57994	9.95909	0.633876	0.398517	2.13789	2.0136	0.0536556	0.317047	22.0737	0.892201
FBgn0262808	CG43179	-3.92026	1.44314e-05	Isolated Up	0.257466	0	0	0.0774632	0.380252	0	0	0.0730708	0	0	0	0.0906242	0.267426	0.0597857	0.0466563	0.675466	1.82078	0.146279	0.056931	1.0849	0.875477	0.107311	0	0.154362	0.262412
FBgn0032533	CG16888	-3.97674	2.88541e-05	Isolated Up	0.0985559	0	0	0.0774632	0.126751	0	0	0.0730708	0.062601	0	0.0458879	0.120832	0.10697	0.0597857	0	0.0587362	0.0275875	0	0	0.0957263	0.306417	0	0.0396309	0.586575	0.577306
FBgn0037166	CG11426	-4.11	7.69884e-15	Isolated Up	416.68	22.082	26.9893	128.744	128.525	38.9696	37.2577	1062.79	1166.41	149.002	119.4	511.211	404.321	20.6858	61.9129	487.364	821.363	62.4124	42.8121	316.726	386.698	16.2308	20.9251	1845.21	2122.28
FBgn0261575	tobi	-4.46322	1.5813e-20	Isolated Up	39.7824	3.21798	3.00943	28.9712	202.801	2.93347	3.53506	4.60346	6.88611	4.9257	7.57151	55.9453	44.3124	2.8996	4.61897	226.986	39.9467	3.70573	4.38369	37.3013	110.354	2.65595	3.96309	106.633	42.6157
FBgn0266637	asRNA:CR45144	-4.56875	6.74342e-10	Isolated Up	0.872745	0.249671	0	9.21812	3.71802	0.126442	0	0.121785	0.563409	0	0.0458879	1.8729	1.71152	0.0597857	0.139969	0.440522	0.4414	0.0487597	0.170793	0.51054	0.175095	0.0536556	0.0396309	1.08053	0.157447
FBgn0002563	Lsp1beta	-5.51412	1.19853e-09	Isolated Up	80.7622	2.2193	3.86927	70.8788	99.1613	5.84164	8.18646	729.758	907.714	0.861998	13.7205	8.76034	15.2433	1.70389	2.75272	25.5503	24.9943	1.70659	0.512379	5.20113	3.32681	1.55601	1.30782	2.46979	0.997166
FBgn0036996	mag	-5.56715	5.35281e-07	Isolated Up	2.40767	0.0554825	0.0955375	8.98573	0.169001	0.202308	0	0.219212	1.94063	0.082095	0	34.5278	5.69616	0.0597857	0.326594	0.117472	0.77245	0.195039	0.398517	0.0319088	0	0	0	2.96375	0.944683
FBgn0002565	Lsp2	-5.57119	3.56092e-10	Isolated Up	272.29	1.4148	3.86927	153.532	538.859	0.32875	1.44193	73.2656	100.349	26.6398	111.645	871.261	467.647	1.55443	2.00622	1183.62	350.665	1.56031	0.597776	64.5195	268.815	1.01946	0.990773	1683.65	625.695
FBgn0038914	fit	-6.11135	5.76885e-15	Isolated Up	45.739	0.332895	0.573225	146.405	321.144	0.0758655	0	21.8725	31.7387	0.082095	0.596543	30.6612	34.899	2.24196	5.64541	144.256	76.0587	1.36527	6.54707	42.1196	112.674	0.0536556	0.158524	61.8682	56.3661
FBgn0004047	Yp3	-7.02123	8.00043e-30	Isolated Up	3322.81	48.9355	47.0045	11061.3	20678.5	27.9944	54.0028	69.198	83.4784	89.8119	61.6734	6765.82	7433.49	68.4247	90.6998	3465.52	89.6594	62.1198	53.6005	3772.38	7802.12	39.9198	55.9588	9839.36	7986.51
FBgn0039678	Obp99a	-7.02602	2.51006e-13	Isolated Up	64.8952	4.1057	5.25456	58.6009	278.471	0.177019	0	0.243569	0.0939014	0.123143	1.19309	138.262	170.216	0.388607	1.30638	255.15	3.25533	0.731395	0.113862	187.56	396.153	0.107311	0.198155	23.5556	32.2242
FBgn0005391	Yp2	-9.65913	5.71328e-37	Isolated Up	2052.33	17.6157	15.1905	5309.17	10102	2.14952	1.90707	4.7496	5.60279	3.40694	4.08402	4188.83	4556.58	3.64693	2.93935	3213.81	17.6284	10.4346	3.52972	3701.64	7301.13	2.65595	3.01195	6186.14	4598.14
FBgn0004045	Yp1	-10.5325	9.12243e-43	Isolated Up	3713.16	1.96963	3.15274	11896.6	22058.5	1.77019	2.88387	7.50193	8.67023	3.20171	4.08402	6659.43	7599.99	4.30457	4.19907	4895.9	23.5321	21.503	7.37257	5558.15	11176.3	5.76798	8.2036	10786.1	8376.82

## Sheet: ShortSD_VS_LongSD_Total
FlyBaseID	GeneName	log2FoldChange	padj	Remark
FBgn0000003	7SLRNA:CR32864	0.698191	0.491663
FBgn0000008	a	-0.315832	0.00761575
FBgn0000015	Abd-B	1.08673	0.477365
FBgn0000017	Abl	-0.168732	0.473196
FBgn0000018	abo	-0.352868	0.0949489
FBgn0000024	Ace	-0.41925	0.149422
FBgn0000028	acj6	0.447273	0.196404
FBgn0000032	Acph-1	-0.190763	0.383332
FBgn0000036	nAChRalpha1	0.359341	0.307083
FBgn0000037	mAChR-A	0.0821553	0.807362
FBgn0000038	nAChRbeta1	0.459338	0.126294
FBgn0000039	nAChRalpha2	0.280954	0.222844
FBgn0000042	Act5C	-0.0978935	0.320996
FBgn0000043	Act42A	-0.166084	0.355505
FBgn0000044	Act57B	-0.428957	0.413312
FBgn0000045	Act79B	-0.380106	0.566715
FBgn0000046	Act87E	-0.133893	0.805638
FBgn0000047	Act88F	-0.95899	0.34625
FBgn0000052	Pfas	-0.317845	0.680113
FBgn0000053	Gart	-0.318656	0.74975
FBgn0000055	Adh	-0.867277	0.114795
FBgn0000057	adp	-0.112832	0.325116
FBgn0000061	al	-0.0150027	0.987215
FBgn0000063	Mps1	-0.0273357	0.967881
FBgn0000064	Ald1	-0.294665	0.380055
FBgn0000071	Ama	0.270682	0.691792
FBgn0000075	amd	0.173631	0.726963
FBgn0000077	amx	-0.0141421	0.954097
FBgn0000078	Amy-d	-0.859454	0.570294
FBgn0000079	Amy-p	0.0892529	0.964343
FBgn0000083	AnxB9	-0.207041	0.407084
FBgn0000084	AnxB10	-0.0995608	0.677658
FBgn0000092	dyw	0.680749	0.168414
FBgn0000097	aop	-0.34814	0.153117
FBgn0000100	RpLP0	-0.245963	0.386245
FBgn0000108	Appl	0.108708	0.668559
FBgn0000109	Aprt	0.0138	0.981808
FBgn0000114	bru1	0.252222	0.209188
FBgn0000115	Arl1	0.0576404	0.801146
FBgn0000116	Argk1	-0.0584568	0.866704
FBgn0000117	arm	-0.116905	0.330778
FBgn0000119	arr	-0.244368	0.0948226
FBgn0000120	Arr1	-0.175663	0.659606
FBgn0000121	Arr2	-0.229293	0.493115
FBgn0000139	ash2	0.290621	0.00304211
FBgn0000140	asp	0.46422	0.646507
FBgn0000146	aub	0.994933	0.00549478
FBgn0000147	aurA	-0.187511	0.805147
FBgn0000150	awd	-0.168061	0.639272
FBgn0000152	Axs	-0.0246418	0.947756
FBgn0000153	b	-0.12291	0.794132
FBgn0000157	Dll	-0.209827	0.185134
FBgn0000158	bam	0.207196	0.93732
FBgn0000163	baz	-0.271836	0.277422
FBgn0000173	ben	0.0823756	0.719971
FBgn0000179	bi	0.124349	0.707492
FBgn0000180	bib	-0.384867	0.160316
FBgn0000181	bic	-0.380081	0.0505215
FBgn0000183	BicD	-0.0298976	0.912056
FBgn0000206	boss	-0.462191	0.309276
FBgn0000212	brm	0.00153932	0.996544
FBgn0000221	brn	0.252894	0.329426
FBgn0000228	Nin	-0.0232033	0.924403
FBgn0000229	bsk	0.113596	0.524887
FBgn0000233	btd	-0.125742	0.749984
FBgn0000239	bur	-0.139607	0.543206
FBgn0000241	bw	-0.133879	0.810078
FBgn0000244	by	-0.138957	0.657574
FBgn0000246	c(3)G	0.251877	0.309276
FBgn0000247	ca	-0.05655	0.802697
FBgn0000250	cact	-0.0990006	0.313544
FBgn0000251	cad	1.27973	0.288432
FBgn0000253	Cam	0.15756	0.464739
FBgn0000256	capu	0.288037	0.194287
FBgn0000257	car	0.0802847	0.671864
FBgn0000259	CkIIbeta	0.127643	0.421607
FBgn0000261	Cat	-0.115776	0.860818
FBgn0000273	Pka-C1	0.268096	0.448692
FBgn0000276	CecA1	0.269972	0.858308
FBgn0000277	CecA2	-0.440822	0.749984
FBgn0000278	CecB	-0.155079	0.941598
FBgn0000279	CecC	-0.138559	0.949744
FBgn0000283	Cp190	0.00911426	0.980595
FBgn0000286	Cf2	-0.24421	0.306814
FBgn0000287	salr	0.098473	0.658043
FBgn0000289	cg	0.0334447	0.905306
FBgn0000299	Col4a1	-0.754453	0.0812507
FBgn0000303	ChAT	0.0941798	0.717201
FBgn0000307	chif	-0.0206449	0.947756
FBgn0000308	chic	-0.0207509	0.94852
FBgn0000316	cin	-0.0323725	0.861792
FBgn0000317	ck	-0.380367	0.417249
FBgn0000318	cl	-0.0171223	0.96941
FBgn0000319	Chc	-0.123945	0.579137
FBgn0000320	eya	-0.237875	0.536236
FBgn0000326	clt	0.0311994	0.915571
FBgn0000330	cm	-0.0818453	0.650137
FBgn0000337	cn	-0.300911	0.764363
FBgn0000339	cni	-0.184783	0.488762
FBgn0000346	comt	0.0396837	0.862206
FBgn0000351	cort	-0.303051	0.697754
FBgn0000352	cos	-0.185019	0.230381
FBgn0000357	Cp18	0.81503	0.132993
FBgn0000358	Cp19	-1.33628	0.237392
FBgn0000370	crc	-0.620929	0.215638
FBgn0000376	crm	-0.0174837	0.945429
FBgn0000377	crn	0.138794	0.45272
FBgn0000382	csw	0.318137	0.0351597
FBgn0000384	cta	-0.05371	0.848653
FBgn0000394	cv	-0.270024	0.39799
FBgn0000395	cv-2	-0.529759	0.00946224
FBgn0000404	CycA	-0.110932	0.840848
FBgn0000405	CycB	0.0355101	0.98129
FBgn0000406	Cyt-b5-r	-0.700161	0.528505
FBgn0000411	D	0.0542325	0.822854
FBgn0000412	D1	0.0738697	0.836209
FBgn0000414	Dab	-0.175181	0.459849
FBgn0000416	Sap-r	-0.110206	0.814995
FBgn0000422	Ddc	-0.400015	0.393143
FBgn0000426	SmF	-0.0526669	0.910545
FBgn0000439	Dfd	-0.211004	0.499664
FBgn0000442	Pkg21D	-0.0883908	0.859579
FBgn0000447	Dhod	-0.292832	0.154768
FBgn0000448	Hr3	0.605275	0.256724
FBgn0000449	dib	1.16097	0.31383
FBgn0000451	ect	0.0820974	0.929851
FBgn0000454	Dip-B	-0.209104	0.52709
FBgn0000455	Dip-C	0.031694	0.917726
FBgn0000459	disco	-0.0854027	0.814974
FBgn0000463	Dl	0.0480547	0.920599
FBgn0000464	Lar	0.476438	0.0812507
FBgn0000473	Cyp6a2	-0.813582	0.57018
FBgn0000477	DNaseII	-0.687819	0.356813
FBgn0000479	dnc	0.296565	0.392762
FBgn0000482	dor	0.0142659	0.953273
FBgn0000489	Pka-C3	0.694727	0.0056427
FBgn0000490	dpp	-0.373205	0.0942024
FBgn0000492	Dr	-0.141323	0.755266
FBgn0000499	dsh	-0.100327	0.53094
FBgn0000500	Dsk	0.176794	0.854652
FBgn0000504	dsx	-0.163807	0.708625
FBgn0000520	dwg	0.117462	0.676413
FBgn0000524	dx	-0.471707	0.173458
FBgn0000527	e	0.367467	0.657982
FBgn0000529	bsh	0.0951324	0.794132
FBgn0000533	ea	-0.686024	0.0103981
FBgn0036655	CG13031	7.53494	7.78515e-06	Short SD Up
FBgn0000536	eas	-0.306797	0.350534
FBgn0000541	E(bx)	0.0350503	0.894633
FBgn0000542	ec	-0.630397	0.119403
FBgn0000543	ecd	-0.0560359	0.761259
FBgn0000546	EcR	0.0249461	0.943831
FBgn0000547	ed	0.0336809	0.916374
FBgn0000551	Edg78E	0.309942	0.599342
FBgn0000552	Edg84A	-0.236868	0.815801
FBgn0000557	eEF1alpha2	-0.199427	0.504619
FBgn0000559	eEF2	-0.316577	0.387879
FBgn0000560	eg	-0.906089	0.107098
FBgn0000562	egl	-0.3957	0.0591032
FBgn0000564	Eh	-2.2666	0.093634
FBgn0000565	MsrA	-0.228746	0.528624
FBgn0000566	Cth	-0.235545	0.339498
FBgn0000567	Eip74EF	0.028048	0.956388
FBgn0000568	Eip75B	0.0280479	0.935772
FBgn0000575	emc	-0.0304266	0.881518
FBgn0000576	ems	-0.401555	0.0685137
FBgn0000577	en	-0.162455	0.615149
FBgn0000578	ena	-0.0942004	0.671903
FBgn0000579	Eno	-0.247852	0.379792
FBgn0000581	E(Pc)	0.00321948	0.99271
FBgn0000588	esc	0.986794	0.000307636
FBgn0000592	Est-6	-0.243405	0.858308
FBgn0038394	CG10264	7.36755	0.000131511	Short SD Up
FBgn0000606	eve	0.608416	0.490057
FBgn0000611	exd	-0.0128073	0.967881
FBgn0000615	exu	0.981397	0.251702
FBgn0000617	Taf9	-0.0520799	0.810542
FBgn0000618	e(y)2	0.0880323	0.802025
FBgn0000625	eyg	0.200462	0.419444
FBgn0000629	E(z)	0.0913037	0.645201
FBgn0000633	tei	-0.04918	0.835588
FBgn0000635	Fas2	-0.0807104	0.673645
FBgn0000636	Fas3	-0.0719805	0.801852
FBgn0000639	Fbp1	1.26184	0.0726294
FBgn0000640	Fbp2	2.29686	0.0661935
FBgn0000644	Fcp3C	0.574973	0.17996
FBgn0000658	fj	-0.89874	0.0761961
FBgn0000659	fkh	-0.0489236	0.900561
FBgn0000662	fl(2)d	0.0604833	0.815235
FBgn0000667	Actn	-0.237906	0.490057
FBgn0000709	fliI	0.0556671	0.801852
FBgn0000711	flw	0.169647	0.25728
FBgn0000715	FMRFa	0.245919	0.536841
FBgn0000719	fog	-0.268696	0.251702
FBgn0000721	for	-0.439836	0.302705
FBgn0000723	FER	-0.152151	0.569351
FBgn0000808	gd	0.779322	0.633997
FBgn0000810	fs(1)K10	-0.0210941	0.939081
FBgn0000826	png	0.762078	0.148965
FBgn0000927	fs(1)Ya	0.424716	0.468341
FBgn0000928	fs(1)Yb	0.0603595	0.945056
FBgn0000964	tj	0.13723	0.670678
FBgn0000996	dup	-0.18934	0.627028
FBgn0001075	ft	-0.22265	0.73142
FBgn0001077	ftz	-0.0486016	0.972642
FBgn0001078	ftz-f1	0.0196556	0.952473
FBgn0001079	fu	-0.0797188	0.681053
FBgn0001083	fw	-0.743407	0.133976
FBgn0001084	fy	-0.063128	0.794663
FBgn0001085	fz	0.180748	0.36466
FBgn0001086	fzy	-0.543674	0.548976
FBgn0001087	g	0.295963	0.125063
FBgn0001089	Gal	-0.272118	0.319065
FBgn0001090	bnb	-0.37742	0.0181237
FBgn0001091	Gapdh1	-0.263757	0.528624
FBgn0001092	Gapdh2	-0.0999113	0.722418
FBgn0001098	Gdh	-0.209526	0.590366
FBgn0001099	gdl	0.818059	0.658407
FBgn0001104	Galphai	-0.0545043	0.864639
FBgn0001105	Gbeta13F	0.29083	0.273291
FBgn0001108	DCTN1-p150	0.00352039	0.987215
FBgn0001112	Gld	-0.232763	0.718575
FBgn0001114	Glt	-0.342858	0.776079
FBgn0001120	gnu	1.62976	0.362391
FBgn0001122	Galphao	0.226854	0.458759
FBgn0001123	Galphas	0.161795	0.241404
FBgn0001124	Got1	-0.238886	0.583336
FBgn0001125	Got2	-0.596239	0.194009
FBgn0001128	Gpdh1	-0.263554	0.492769
FBgn0001133	grau	0.092847	0.630443
FBgn0001134	Grd	-0.128842	0.761434
FBgn0001137	grk	0.119098	0.749432
FBgn0001138	grn	-0.0504292	0.859763
FBgn0001139	gro	0.122363	0.654465
FBgn0001142	Gs1	-0.154512	0.446164
FBgn0001145	Gs2	-0.212411	0.662162
FBgn0030377	CG1924	7.17884	4.53472e-05	Short SD Up
FBgn0001148	gsb	-1.59119	0.316211
FBgn0001149	GstD1	-0.711191	0.0155527
FBgn0001150	gt	0.0624797	0.91434
FBgn0001168	h	-0.542517	0.0733054
FBgn0001169	H	-0.0947197	0.668531
FBgn0001170	H2.0	0.303969	0.574031
FBgn0001174	halo	-0.36016	0.798696
FBgn0001179	hay	0.0275944	0.917016
FBgn0001180	hb	-0.112248	0.569937
FBgn0001185	her	-0.0960871	0.507162
FBgn0001186	Hex-A	-0.0239391	0.947091
FBgn0001187	Hex-C	-0.774025	0.424121
FBgn0001189	hfw	-0.184788	0.646798
FBgn0001197	His2Av	0.0738866	0.777924
FBgn0001202	hook	0.0998129	0.494697
FBgn0001206	Hmr	0.120844	0.671857
FBgn0001208	Hn	-0.615957	0.496919
FBgn0001215	Hrb98DE	0.0876648	0.656385
FBgn0001216	Hsc70-1	-0.0251858	0.943831
FBgn0001217	Hsc70-2	0.316095	0.721979
FBgn0001218	Hsc70-3	-0.204733	0.526072
FBgn0001220	Hsc70-5	-0.271298	0.164488
FBgn0001222	Hsf	0.00345149	0.987091
FBgn0001224	Hsp23	-0.887319	0.112925
FBgn0001225	Hsp26	-1.06192	0.239984
FBgn0001226	Hsp27	-0.884803	0.293369
FBgn0001227	Hsp67Ba	-0.105931	0.68395
FBgn0001229	Hsp67Bc	-0.0675846	0.831032
FBgn0001230	Hsp68	-0.713947	0.208265
FBgn0001233	Hsp83	0.00540569	0.987215
FBgn0001234	lncRNA:Hsromega	0.190115	0.329246
FBgn0001235	hth	0.127448	0.703042
FBgn0001247	Ide	0.0570221	0.668531
FBgn0001248	Idh	-0.600599	0.253902
FBgn0001250	if	-0.107134	0.757882
FBgn0001253	ImpE1	0.782697	0.0288716
FBgn0001254	ImpE2	0.694362	0.617951
FBgn0001255	ImpE3	0.504523	0.526119
FBgn0001256	ImpL1	0.0799018	0.967881
FBgn0001257	ImpL2	-0.195521	0.742339
FBgn0083141	Spn28B	6.43313	4.12168e-05	Short SD Up
FBgn0001259	in	-0.817596	0.342975
FBgn0001263	inaD	-0.346695	0.274777
FBgn0001269	inv	-0.0600294	0.842885
FBgn0001276	ix	0.169312	0.499154
FBgn0001280	janA	0.683104	0.0162454
FBgn0001285	Jon44E	0.00288797	0.998177
FBgn0001291	Jra	-0.0912224	0.612469
FBgn0001296	kar	-0.159618	0.681053
FBgn0001297	kay	-0.0106289	0.975425
FBgn0001301	kel	-0.113402	0.632444
FBgn0001308	Khc	-0.0890592	0.395491
FBgn0001311	kkv	-0.487248	0.745959
FBgn0001316	klar	-0.00384798	0.991118
FBgn0001319	kn	0.0808306	0.713025
FBgn0001320	kni	-0.280482	0.396491
FBgn0001321	knk	-0.573293	0.139217
FBgn0001323	knrl	-0.0531256	0.907669
FBgn0001324	kto	-0.111455	0.626188
FBgn0001325	Kr	0.122826	0.715476
FBgn0001330	kz	0.0475007	0.84617
FBgn0001341	Mybbp1A	-0.0512819	0.870319
FBgn0001404	egh	-0.0637391	0.77865
FBgn0001491	l(1)10Bb	0.0911327	0.774575
FBgn0001565	Hlc	0.130491	0.659085
FBgn0001612	Grip91	0.0558129	0.776905
FBgn0001624	dlg1	0.213701	0.329387
FBgn0001941	ifc	-0.0508055	0.756749
FBgn0001942	eIF4A	-0.215872	0.295962
FBgn0001961	Arpc1	-0.00340422	0.987215
FBgn0001965	Sos	-0.0673006	0.754293
FBgn0001967	NimC3	-1.0457	0.448037
FBgn0001970	Pgant35A	0.110651	0.621013
FBgn0001977	CIAPIN1	0.0588056	0.671864
FBgn0001978	stc	-0.0713764	0.743654
FBgn0001986	Mtr4	0.0223584	0.947091
FBgn0001987	Gli	-0.501652	0.1955
FBgn0001989	ND-B17	0.10385	0.754568
FBgn0001990	wek	-0.213307	0.0753741
FBgn0001991	Ca-alpha1D	0.493359	0.0244788
FBgn0001992	Cyp303a1	2.34855	0.0743149
FBgn0001994	crp	0.131915	0.627358
FBgn0001995	mRpL4	0.0217338	0.947296
FBgn0002021	l(2)37Bb	-0.284548	0.0517662
FBgn0002022	Catsup	-0.490825	0.107643
FBgn0002023	Lim3	0.120615	0.628462
FBgn0002031	Phb1	-0.283062	0.137194
FBgn0002036	CG10561	0.184821	0.312863
FBgn0002044	swm	-0.00744844	0.965189
FBgn0002069	AspRS	-0.18927	0.499312
FBgn0002121	l(2)gl	-0.149955	0.697754
FBgn0002174	CG5504	-0.174359	0.513538
FBgn0002183	dre4	0.0603893	0.797345
FBgn0002283	l(3)73Ah	0.154478	0.54012
FBgn0002284	Prosbeta6	0.128054	0.714893
FBgn0002306	sas	-0.40551	0.36073
FBgn0002354	l(3)87Df	0.0709779	0.63546
FBgn0002413	dco	-0.137299	0.363475
FBgn0002431	hyd	-0.00972252	0.980595
FBgn0002440	l(3)mbn	0.85849	0.6725
FBgn0002441	l(3)mbt	0.0501141	0.78939
FBgn0002466	sti	0.162705	0.772012
FBgn0002521	pho	0.113539	0.624013
FBgn0002522	lab	0.0259457	0.960768
FBgn0002524	lace	-0.13226	0.513538
FBgn0002525	Lam	0.0703401	0.765859
FBgn0002526	LanA	-0.663901	0.223208
FBgn0002531	Lcp1	0.151526	0.95545
FBgn0002534	Lcp3	1.22036	0.0791279
FBgn0002535	Lcp4	2.04163	0.168397
FBgn0002542	lds	0.433327	0.398255
FBgn0002543	robo2	-0.0323113	0.936749
FBgn0002552	lin	-0.101853	0.659466
FBgn0002562	Lsp1alpha	-0.100929	0.972075
FBgn0036363	CG10140	6.39045	0.000143032	Short SD Up
FBgn0002564	Lsp1gamma	-1.08825	0.316467
FBgn0002565	Lsp2	-0.829462	0.727642
FBgn0002566	lt	0.199911	0.137532
FBgn0002567	Rab32	-0.343321	0.515218
FBgn0002569	Mal-A2	-0.597679	0.606379
FBgn0002570	Mal-A1	-0.300813	0.6453
FBgn0002571	Mal-A3	0.489091	0.799384
FBgn0002573	sens	-0.329107	0.717201
FBgn0002576	lz	0.251933	0.491115
FBgn0034221	CG10764	6.35303	1.88026e-09	Short SD Up
FBgn0002578	Kaz-m1	0.961684	0.362408
FBgn0002579	RpL36	-0.195229	0.690402
FBgn0002590	RpS5a	-0.211213	0.62398
FBgn0002592	E(spl)m2-BFM	-0.280902	0.7007
FBgn0002593	RpLP1	-0.125772	0.802025
FBgn0002609	E(spl)m3-HLH	0.385049	0.530522
FBgn0002622	RpS3	-0.274606	0.481399
FBgn0002626	RpL32	-0.108392	0.813179
FBgn0002632	E(spl)m6-BFM	1.76768	0.0640779
FBgn0002633	E(spl)m7-HLH	0.775512	0.516603
FBgn0002638	Rcc1	0.0482922	0.826716
FBgn0002641	mal	-0.12978	0.441029
FBgn0002643	mam	0.195691	0.390754
FBgn0002645	Map205	-0.544273	0.0159822
FBgn0002673	twe	0.122415	0.808953
FBgn0002707	mei-9	-0.0786228	0.848749
FBgn0002709	mei-218	0.792272	0.418955
FBgn0002715	mei-S332	0.202894	0.596998
FBgn0002716	mei-W68	0.0345795	0.965189
FBgn0002719	Men	-0.277218	0.579493
FBgn0002723	Met	0.222201	0.434557
FBgn0267589	asRNA:CR45927	6.27129	0.000171691	Short SD Up
FBgn0002733	E(spl)mbeta-HLH	-0.275607	0.651519
FBgn0002734	E(spl)mdelta-HLH	0.0582699	NA
FBgn0002736	mago	0.191169	0.467412
FBgn0002772	Mlc1	-0.197741	0.764363
FBgn0002773	Mlc2	-0.187318	0.778595
FBgn0002774	mle	0.0513547	0.799384
FBgn0002775	msl-3	0.0324457	0.902238
FBgn0002778	mnd	0.00317267	0.994987
FBgn0002780	mod	0.0660139	0.761434
FBgn0002781	mod(mdg4)	0.0747023	0.706896
FBgn0002783	mor	0.00191549	0.995122
FBgn0002787	Rpn8	0.0249064	0.947091
FBgn0002789	Mp20	0.0997408	0.769865
FBgn0002791	mr	0.336889	0.0478889
FBgn0002862	Mst87F	-0.580722	0.675334
FBgn0002863	Acp95EF	-1.97748	NA
FBgn0002868	MtnA	0.160525	0.88242
FBgn0002869	MtnB	-1.1809	0.294916
FBgn0002872	mu2	0.128322	0.703363
FBgn0002873	mud	-0.146593	0.828344
FBgn0002878	mus101	-0.274398	0.457417
FBgn0002887	mus201	0.244656	0.438655
FBgn0002891	PolZ1	-0.151588	0.710256
FBgn0002899	mus301	-0.283658	0.419693
FBgn0002901	mus304	0.238943	0.241929
FBgn0002905	PolQ	0.382213	0.155698
FBgn0002906	Blm	0.43229	0.124699
FBgn0002917	na	0.484498	0.00740096
FBgn0002921	Atpalpha	0.0595094	0.812371
FBgn0002922	nau	0.339493	0.592208
FBgn0002924	ncd	-0.0850401	0.869206
FBgn0002930	nec	-0.390578	0.53059
FBgn0002931	net	-0.322201	0.418828
FBgn0002932	neur	-0.0783088	0.724339
FBgn0002936	ninaA	0.135537	0.821312
FBgn0002937	ninaB	-0.513184	0.294916
FBgn0002938	ninaC	-0.448923	0.236221
FBgn0002939	ninaD	-0.955972	0.353414
FBgn0002940	ninaE	-0.374107	0.210028
FBgn0002941	slou	0.353593	0.340094
FBgn0002945	nkd	-0.112043	0.681292
FBgn0002948	nod	-0.12874	0.743183
FBgn0002973	numb	0.0640263	0.836416
FBgn0002985	odd	-0.192043	0.457327
FBgn0002989	okr	-0.077801	0.770641
FBgn0003002	opa	-0.120632	0.545757
FBgn0003008	or	0.276262	0.0917194
FBgn0003011	ort	-0.186514	0.520578
FBgn0003016	osp	-0.148159	0.555358
FBgn0003023	otu	0.846999	0.160609
FBgn0003028	ovo	-0.176855	0.673425
FBgn0003041	pbl	0.0578518	0.762038
FBgn0003042	Pc	0.0110977	0.967718
FBgn0003044	Pcl	-0.119544	0.635081
FBgn0003046	Pcp	0.0241324	0.983192
FBgn0003048	pcx	0.0443947	0.892472
FBgn0003053	peb	-0.0791196	0.801537
FBgn0003114	plu	6.03827	1.88026e-09	Short SD Up
FBgn0003062	Fib	-0.319184	0.250048
FBgn0003065	CG2150	0.321306	0.820833
FBgn0003068	per	-0.0852961	0.877759
FBgn0003071	Pfk	-0.214506	0.327589
FBgn0003074	Pgi	-0.388475	0.193526
FBgn0003076	Pgm1	-0.0521708	0.945429
FBgn0003079	Raf	0.048846	0.807221
FBgn0003082	phr	-0.20299	0.658407
FBgn0003087	pim	-0.574029	0.586492
FBgn0003089	pip	-0.368999	0.618655
FBgn0003090	pk	0.131372	0.545934
FBgn0003091	Pkc53E	0.562653	0.00798982
FBgn0003093	Pkc98E	0.153881	0.574403
FBgn0043577	PGRP-SB2	5.71769	0.000153628	Short SD Up
FBgn0003116	pn	-0.0483042	0.880146
FBgn0003117	pnr	-0.745792	0.178208
FBgn0003118	pnt	-0.527929	0.00366235
FBgn0003124	polo	0.313093	0.769342
FBgn0003129	Poxm	-0.455699	0.552691
FBgn0003130	Poxn	0.501442	0.156512
FBgn0003132	Pp1-13C	0.694075	0.419449
FBgn0003134	Pp1alpha-96A	-0.072084	0.783863
FBgn0003137	Ppn	-0.80386	0.207167
FBgn0003139	PpV	0.0359932	0.814013
FBgn0003141	pr	-0.084139	0.888905
FBgn0003145	prd	-0.146748	0.935802
FBgn0003149	Prm	-0.527496	0.37938
FBgn0003159	CG2841	-0.368159	0.157562
FBgn0003162	Pu	-0.239973	0.675284
FBgn0003165	pum	0.167493	0.653625
FBgn0003169	put	0.00615852	0.987215
FBgn0003174	pwn	-0.449209	0.351007
FBgn0003175	px	0.0502135	0.777261
FBgn0003187	qua	-0.0328301	0.963886
FBgn0003189	r	-0.0553033	0.916169
FBgn0003204	ras	-0.0629856	0.798584
FBgn0003205	Ras85D	-0.0975714	0.445934
FBgn0003206	Ras64B	0.113592	0.240582
FBgn0003209	raw	0.00335373	0.990991
FBgn0003210	rb	0.00304831	0.993605
FBgn0003218	rdgB	-0.0156873	0.963886
FBgn0003227	rec	0.169548	0.724127
FBgn0003231	ref(2)P	-0.369092	4.17602e-06
FBgn0003248	Rh2	-0.324651	0.660154
FBgn0003249	Rh3	-0.301952	0.405236
FBgn0003250	Rh4	0.0349555	0.950707
FBgn0003254	rib	-0.525343	0.326204
FBgn0003255	rk	-0.143778	0.574139
FBgn0003256	rl	0.0975044	0.807257
FBgn0003257	r-l	0.0552549	0.876524
FBgn0003261	Rm62	0.0026112	0.987215
FBgn0003267	ro	-0.0670562	0.960219
FBgn0003268	rod	0.164624	0.67823
FBgn0003274	RpLP2	-0.114363	0.872555
FBgn0003275	Polr2F	-0.0523784	0.900561
FBgn0003277	Polr2A	-0.215104	0.219915
FBgn0003278	Polr1B	0.278988	0.165487
FBgn0003279	RpL4	-0.137559	0.706668
FBgn0003285	rst	0.29732	0.177859
FBgn0003292	rt	-0.0573468	0.852701
FBgn0003295	ru	-0.10033	0.676051
FBgn0003300	run	0.0980839	0.826165
FBgn0003301	rut	0.503829	0.0548165
FBgn0003302	rux	0.182463	0.493549
FBgn0003308	ry	-0.258557	0.586682
FBgn0003310	S	-0.0337999	0.900561
FBgn0003312	sad	-0.43726	0.526119
FBgn0003317	sax	-0.0237096	0.905029
FBgn0003319	Sb	0.41506	0.472881
FBgn0003321	sbr	0.318062	0.168397
FBgn0003326	sca	0.0769329	0.795805
FBgn0003330	Sce	0.0164781	0.964536
FBgn0003334	Scm	-0.141031	0.525839
FBgn0003339	Scr	-0.13444	0.547362
FBgn0003345	sd	0.0853083	0.77876
FBgn0003346	RanGAP	-0.0779501	0.787664
FBgn0003353	sei	0.144492	0.440854
FBgn0003356	Jon99Cii	-0.292412	0.896074
FBgn0003357	Jon99Ciii	-0.035951	0.986804
FBgn0003358	Jon99Ci	-1.16298	0.398423
FBgn0003360	sesB	-0.333012	0.326204
FBgn0003366	sev	-0.165594	0.587831
FBgn0003371	sgg	-0.276921	0.194009
FBgn0003372	Sgs1	-0.394662	0.604058
FBgn0003374	Sgs4	0.949109	0.493059
FBgn0003380	Sh	0.284204	0.537394
FBgn0003382	sha	-0.102165	0.967881
FBgn0003386	Shaw	0.46035	0.0474364
FBgn0003388	shd	-1.45818	0.058139
FBgn0003390	shf	-0.743651	0.0746596
FBgn0003391	shg	-0.214695	0.480394
FBgn0003392	shi	0.0301552	0.904099
FBgn0003396	shn	-0.0953393	0.747773
FBgn0003401	shu	0.474394	0.622041
FBgn0003410	sina	0.0373454	0.887515
FBgn0003415	skd	0.231895	0.476744
FBgn0003416	sl	-0.167605	0.650716
FBgn0003423	slgA	-0.0153051	0.95789
FBgn0003429	slo	0.3094	0.340593
FBgn0003430	slp1	0.0316355	0.933858
FBgn0003435	sm	0.232759	0.376157
FBgn0003444	smo	-0.190806	0.282743
FBgn0003447	sn	0.0254387	0.965344
FBgn0003448	sna	0.405575	0.81198
FBgn0003449	snf	0.137785	0.526825
FBgn0003459	stwl	-0.312673	0.151429
FBgn0003460	so	-0.186462	0.446164
FBgn0003462	Sod1	-0.207835	0.508717
FBgn0003463	sog	-0.121659	0.621191
FBgn0003464	sol	0.123932	0.576802
FBgn0003475	spir	0.0611414	0.727443
FBgn0003479	spn-A	0.913356	0.00157182
FBgn0003480	spn-B	-0.361326	0.0621806
FBgn0003482	spn-D	0.710705	0.630586
FBgn0003483	spn-E	0.226823	0.459849
FBgn0003495	spz	-0.0923133	0.709594
FBgn0003499	sr	-0.0389699	0.908856
FBgn0003502	Btk	-0.0878332	0.753481
FBgn0003507	srp	-0.634923	0.470879
FBgn0003512	Sry-delta	0.0468529	0.891037
FBgn0003513	ss	0.441156	0.129467
FBgn0003514	sqh	-0.156225	0.380564
FBgn0003515	st	0.115634	0.874225
FBgn0003517	sta	-0.133005	0.718579
FBgn0003520	stau	0.1208	0.477365
FBgn0003525	stg	-0.385573	0.443435
FBgn0003545	sub	1.00003	NA
FBgn0003557	Su(dx)	-0.173489	0.240266
FBgn0003559	su(f)	0.118087	0.452294
FBgn0003567	su(Hw)	-0.0694629	0.619568
FBgn0003575	su(sable)	0.0587595	0.724092
FBgn0003598	Su(var)3-7	-0.154361	0.49384
FBgn0003607	Su(var)205	0.157429	0.504209
FBgn0003612	Su(var)2-10	0.0882081	0.657982
FBgn0003638	su(w[a])	0.290885	0.376352
FBgn0003651	svp	-0.112733	0.760448
FBgn0003654	sw	-0.100148	0.547827
FBgn0030641	CG6299	5.6259	2.53175e-05	Short SD Up
FBgn0003656	sws	-0.0469217	0.791608
FBgn0003660	Syb	-0.24259	0.397834
FBgn0003676	CCT1	0.116291	0.638414
FBgn0003683	term	0.887378	0.655617
FBgn0003687	Tbp	0.0412266	0.894027
FBgn0003701	thr	-0.743884	0.240654
FBgn0003710	tipE	0.108563	0.604058
FBgn0003714	tko	0.153874	0.702696
FBgn0003716	tkv	-0.105761	0.6025
FBgn0003719	tld	0.222479	0.647863
FBgn0003721	Tm1	-0.102223	0.787361
FBgn0003731	Egfr	-0.339336	0.592907
FBgn0003733	tor	0.27421	0.903076
FBgn0003741	tra	0.261174	0.40433
FBgn0003742	tra2	-0.0601516	0.766142
FBgn0003744	trc	-0.0926372	0.584285
FBgn0003747	Gr5a	-0.369918	0.693498
FBgn0003748	Treh	0.00212093	0.995925
FBgn0003751	trk	0.599572	0.391158
FBgn0003861	trp	-0.469233	0.0601889
FBgn0003862	trx	-0.0161493	0.968261
FBgn0031034	CG14205	5.59568	1.88255e-06	Short SD Up
FBgn0003866	tsh	-0.0186646	0.960219
FBgn0003867	tsl	-0.58634	0.360218
FBgn0003870	ttk	-0.309674	0.240582
FBgn0003882	tub	-0.0373783	0.866859
FBgn0003884	alphaTub84B	0.00379852	0.989916
FBgn0003885	alphaTub84D	0.043213	0.890335
FBgn0003886	alphaTub85E	-0.133192	0.942233
FBgn0003889	betaTub85D	0.212176	0.750243
FBgn0003890	betaTub97EF	-0.108259	0.814995
FBgn0003891	tud	-0.0542516	0.808674
FBgn0003892	ptc	-0.240011	0.565723
FBgn0003896	tup	0.103299	0.550335
FBgn0003900	twi	0.516203	0.387884
FBgn0003930	snRNA:U4:39B	0.687144	0.344315
FBgn0003941	RpL40	0.0315123	0.94852
FBgn0003942	RpS27A	-0.0298592	0.958368
FBgn0003943	Ubi-p63E	-0.84917	0.00144834
FBgn0003944	Ubx	0.843049	0.194996
FBgn0003950	unc	-1.36789	0.0717604
FBgn0003963	ush	0.183758	0.36198
FBgn0003964	usp	0.0857828	0.446191
FBgn0003965	v	-0.81043	0.215642
FBgn0003969	vap	0.0739495	0.715691
FBgn0003975	vg	0.172054	0.680348
FBgn0003977	vir	-0.07247	0.674288
FBgn0003978	vls	0.126698	0.639697
FBgn0003980	Vm26Ab	1.13947	0.386656
FBgn0003984	vn	0.029609	0.952473
FBgn0003996	w	-0.248229	0.727443
FBgn0003997	hid	0.0932987	0.781649
FBgn0004003	wbl	0.0721283	0.930512
FBgn0004034	y	0.25168	0.843936
FBgn0004045	Yp1	0.265035	0.946434
FBgn0004047	Yp3	0.499812	0.845813
FBgn0004049	yrt	-0.113303	0.364825
FBgn0004050	z	0.0100211	0.974149
FBgn0004055	uzip	-0.03802	0.874225
FBgn0004057	Zw	-0.810172	0.0928275
FBgn0004066	Prosalpha4	0.0472415	0.889367
FBgn0004087	Dhfr	0.153897	0.749984
FBgn0004101	bs	0.0101369	0.96084
FBgn0004102	oc	-0.241917	0.314632
FBgn0004103	Pp1-87B	-0.0908603	0.588932
FBgn0004106	Cdk1	-0.00947271	0.994987
FBgn0004107	Cdk2	-0.193407	0.542263
FBgn0004108	Nrt	-0.167952	0.427215
FBgn0004110	tin	-0.532925	0.520089
FBgn0004117	Tm2	-0.161344	0.724944
FBgn0004118	nAChRbeta2	0.33463	0.0369083
FBgn0004132	boca	0.233749	0.386245
FBgn0004133	blow	0.0972135	0.646798
FBgn0004167	kst	-0.0943009	0.727443
FBgn0004168	5-HT1A	0.164934	0.575429
FBgn0004169	up	-0.23714	0.635438
FBgn0004177	mts	0.0250929	0.933018
FBgn0004179	Csp	-0.0562472	0.846708
FBgn0004187	snRNA:U1:95Cc	-1.39158	0.434557
FBgn0004192	snRNA:U2:34ABb	-1.62691	0.27309
FBgn0004197	Ser	-0.721326	0.0887958
FBgn0004198	ct	0.109893	0.724618
FBgn0004227	nonA	0.0631721	0.62682
FBgn0004228	mex1	0.547704	0.688687
FBgn0004237	Hrb87F	-0.0374517	0.893629
FBgn0004240	DptA	0.704415	0.624725
FBgn0004242	Syt1	0.239952	0.306331
FBgn0004244	Rdl	0.584965	0.116267
FBgn0004359	T48	-0.0737418	0.776523
FBgn0034082	CG10734	4.81036	3.91551e-05	Short SD Up
FBgn0004362	HmgD	0.421842	0.170857
FBgn0004363	porin	-0.291376	0.13009
FBgn0004367	mei-41	-0.0549316	0.876524
FBgn0004368	Ptp4E	-0.0726686	0.741132
FBgn0004369	Ptp99A	0.205248	0.395169
FBgn0004370	Ptp10D	-0.187566	0.38393
FBgn0004373	fwd	-0.0320639	0.925181
FBgn0267099	lncRNA:CR45539	4.7432	9.52616e-07	Short SD Up
FBgn0004378	Klp61F	-1.41095	0.265855
FBgn0004379	Klp67A	0.0680171	0.955355
FBgn0004380	Klp64D	-0.0438793	0.813389
FBgn0004381	Klp68D	-0.0454481	0.814263
FBgn0004387	Klp98A	-0.160588	0.340749
FBgn0004390	RasGAP1	-0.141941	0.523381
FBgn0004391	shtd	0.0897638	0.659815
FBgn0004394	pdm2	0.280782	0.488822
FBgn0004395	unk	0.170198	0.564619
FBgn0004396	CrebA	0.166773	0.534028
FBgn0004397	Vinc	-0.198354	0.340094
FBgn0002563	Lsp1beta	4.62189	4.68661e-05	Short SD Up
FBgn0004401	Pep	0.0487291	0.888636
FBgn0004403	RpS14a	-0.088875	0.803636
FBgn0004404	RpS14b	-0.0810066	0.850283
FBgn0004406	PolG1	-0.21774	0.618145
FBgn0004419	me31B	0.0421727	0.80966
FBgn0004427	LysD	-0.147894	0.95789
FBgn0004430	LysS	-0.232413	0.901645
FBgn0004432	Cyp1	-0.151784	0.566715
FBgn0004435	Galphaq	0.235832	0.265741
FBgn0004436	Ubc6	-0.0686257	0.766931
FBgn0004449	Ten-m	-0.0620132	0.785822
FBgn0004456	mew	-0.0541715	0.821312
FBgn0004463	Polr3B	0.0835043	0.697754
FBgn0004465	Su(P)	0.299203	0.202269
FBgn0004507	GlyP	-0.424281	0.275761
FBgn0004509	Fur1	0.113419	0.533592
FBgn0004510	Ets97D	-0.074186	0.738856
FBgn0004511	dy	-0.0672638	0.95835
FBgn0004512	Mdr49	-0.248421	0.580848
FBgn0004513	Mdr65	-0.309675	0.409663
FBgn0004514	Oct-TyrR	0.00402671	0.989664
FBgn0004516	Gad1	-0.0559571	0.81704
FBgn0004552	Akh	-0.867504	0.2019
FBgn0039342	CG5107	4.55977	1.09032e-07	Short SD Up
FBgn0004556	Dbp73D	-0.0883949	0.753289
FBgn0004567	slp2	-0.156387	0.608866
FBgn0004569	aos	-0.222936	0.609298
FBgn0004573	5-HT7	0.147615	0.563329
FBgn0004574	Rop	-0.0784789	0.673645
FBgn0004575	Syn	-0.0663301	0.820873
FBgn0004577	Pxd	1.67734	0.286123
FBgn0004580	Cbp53E	0.203378	0.338543
FBgn0004581	bgcn	-0.00998544	0.995196
FBgn0004583	ex	-0.462673	0.319098
FBgn0004584	Rrp1	-0.049096	0.901645
FBgn0004587	B52	0.0817731	0.76819
FBgn0004595	pros	0.378658	0.413637
FBgn0004597	CycC	0.0896054	0.627726
FBgn0004598	Fur2	0.0247657	0.859537
FBgn0004606	zfh1	0.10632	0.658627
FBgn0004607	zfh2	-0.0365128	0.936715
FBgn0004611	Plc21C	0.0492445	0.855492
FBgn0004618	gl	-0.171185	0.476548
FBgn0004619	GluRIA	0.0617602	0.814295
FBgn0004620	GluRIIA	-0.232308	0.448971
FBgn0004622	TkR99D	-0.0348951	0.92797
FBgn0004623	Gbeta76C	-0.412877	0.329767
FBgn0004629	Cys	-0.471297	0.337554
FBgn0004635	rho	-0.134804	0.635369
FBgn0004636	Rap1	-0.0870783	0.64646
FBgn0004638	drk	0.0200884	0.958417
FBgn0004643	Zw10	-0.0839287	0.665244
FBgn0004644	hh	-0.583666	0.354655
FBgn0004646	ogre	-0.514565	0.241467
FBgn0004647	N	-0.104025	0.75522
FBgn0004648	svr	-0.0511574	0.766601
FBgn0004650	fs(1)N	-0.864583	0.466655
FBgn0004652	fru	0.143438	0.348348
FBgn0004654	Pgd	-0.650426	0.209602
FBgn0004655	wapl	0.00741914	0.983471
FBgn0004656	fs(1)h	0.241281	0.46618
FBgn0004657	mys	-0.156387	0.563217
FBgn0004666	sim	0.0348988	0.946982
FBgn0004687	Mlc-c	-0.129117	0.640066
FBgn0004698	Xpc	0.13974	0.325002
FBgn0004777	Ccp84Ag	0.400276	0.785182
FBgn0004779	Ccp84Ae	0.35218	0.887515
FBgn0004780	Ccp84Ad	0.189739	0.939081
FBgn0004781	Ccp84Ac	-1.63798	0.428879
FBgn0004782	Ccp84Ab	0.0826985	0.976525
FBgn0004783	Ccp84Aa	1.24524	0.532144
FBgn0004784	inaC	-0.318619	0.45216
FBgn0004795	retn	-0.285205	0.314267
FBgn0004797	mdy	-0.369717	0.588393
FBgn0004811	fs(2)ltoPP43	-0.118498	0.314267
FBgn0004828	His3.3B	-0.021176	0.916913
FBgn0004832	Xpac	0.172236	0.621599
FBgn0004837	Su(H)	-0.191625	0.202441
FBgn0004838	Hrb27C	0.270705	0.299998
FBgn0004839	otk	0.152737	0.618104
FBgn0004841	TkR86C	0.00764901	0.984813
FBgn0004842	RYa-R	-0.00619561	0.993605
FBgn0004852	Ac76E	0.0701801	0.745959
FBgn0004854	B-H2	-0.301075	0.410769
FBgn0004855	Polr2I	0.0896311	0.621599
FBgn0004856	Bx42	-0.0600203	0.581962
FBgn0004858	elB	-0.009867	0.976299
FBgn0004859	ci	-0.0759362	0.882208
FBgn0004860	ph-d	-0.00682171	0.986146
FBgn0004861	ph-p	0.0558219	0.810078
FBgn0004862	bap	-0.169272	0.74845
FBgn0004863	C15	0.320536	0.441029
FBgn0004864	hop	0.0358136	0.922416
FBgn0004865	Eip78C	0.104124	0.678651
FBgn0004867	RpS2	-0.198404	0.489825
FBgn0004868	Gdi	0.0966729	0.465018
FBgn0004870	bab1	0.188671	0.662562
FBgn0004872	piwi	0.353001	0.680808
FBgn0004875	enc	0.0476696	0.872735
FBgn0004876	cdi	0.0782894	0.801537
FBgn0004878	cas	0.494734	NA
FBgn0004880	scrt	0.442188	0.13009
FBgn0004882	orb	-0.037252	0.930512
FBgn0004885	tok	-0.147408	0.524931
FBgn0004888	Scsalpha1	-0.104646	0.781974
FBgn0004889	tws	-0.0282628	0.92969
FBgn0004892	sob	-0.257979	0.386245
FBgn0004893	bowl	-0.239395	0.502419
FBgn0004896	fd59A	0.0533379	0.879534
FBgn0004897	fd96Ca	0.369231	0.656725
FBgn0004898	fd96Cb	-0.6838	0.178517
FBgn0004901	Prat	-0.205823	0.552276
FBgn0004903	Rb97D	0.2276	0.251845
FBgn0004907	14-3-3zeta	-0.0251648	0.918513
FBgn0004908	Arl2	0.104011	0.60322
FBgn0004910	Eip63F-1	-0.0789345	0.785182
FBgn0004911	asRNA:Eig63F-2	0.18702	0.909551
FBgn0004913	Gnf1	0.0606403	0.742601
FBgn0004914	Hnf4	-0.704033	0.0245708
FBgn0004915	TfIIB	0.0572356	0.770513
FBgn0004919	gol	0.138534	0.674598
FBgn0004921	Ggamma1	-0.00155175	0.995196
FBgn0004924	Top1	0.09794	0.657172
FBgn0004926	eIF2beta	-0.0209751	0.958368
FBgn0004956	upd1	-0.95163	0.568593
FBgn0004957	por	0.0979356	0.562823
FBgn0004959	phm	0.426317	0.771507
FBgn0005198	gig	0.0125496	0.95628
FBgn0005278	Sam-S	-0.122253	0.741194
FBgn0005322	nmd	0.0231432	0.920466
FBgn0005355	Su(fu)	0.03898	0.854513
FBgn0005386	ash1	0.0996292	0.739535
FBgn0005390	fs(1)M3	-0.802096	0.460087
FBgn0005391	Yp2	-0.0153291	0.997085
FBgn0005411	U2af50	0.0374696	0.770238
FBgn0005427	ewg	0.096625	0.671903
FBgn0005533	RpS17	-0.141124	0.722418
FBgn0005536	Mbs	0.0147304	0.944307
FBgn0005558	ey	0.099943	0.710431
FBgn0005561	sv	-0.22751	0.577987
FBgn0005564	Shal	0.164924	0.276608
FBgn0005585	Calr	-0.0174135	0.967881
FBgn0005586	Rab3	0.0506623	0.841004
FBgn0005590	scw	1.08531	0.585878
FBgn0005593	RpL7	-0.232791	0.453939
FBgn0005596	yem	0.00877443	0.980595
FBgn0005612	Sox14	-0.192078	0.710256
FBgn0005613	Sox15	-0.31713	0.466655
FBgn0005614	trpl	-0.126758	0.876288
FBgn0005616	msl-2	0.0908768	0.696342
FBgn0005617	msl-1	-0.0873593	0.748278
FBgn0005619	Hdc	0.0720696	0.886484
FBgn0005624	Psc	-0.20362	0.120238
FBgn0005626	ple	-0.0903818	0.858308
FBgn0005631	robo1	-0.000237807	0.999715
FBgn0005632	faf	-0.021931	0.926783
FBgn0005633	fln	0.656682	0.393016
FBgn0005636	nvy	0.209899	0.271397
FBgn0005638	slbo	0.0182613	0.987091
FBgn0005640	Eip63E	0.0880203	0.657574
FBgn0005642	wdn	0.0772864	0.789154
FBgn0005648	Pabp2	-0.177909	0.663819
FBgn0005649	Rox8	-0.103758	0.56671
FBgn0005655	PCNA	-0.985028	0.165243
FBgn0005658	Ets65A	0.0895818	0.713025
FBgn0005659	Ets98B	-0.168875	0.724387
FBgn0005660	Ets21C	-0.306066	0.668896
FBgn0005664	Crys	-0.90337	0.436753
FBgn0005666	bt	0.364554	0.105752
FBgn0031644	CG15625	4.52599	4.84637e-07	Short SD Up
FBgn0005671	Vha55	-0.134513	0.452623
FBgn0005672	spi	0.0330351	0.916913
FBgn0005674	GluProRS	-0.130544	0.619413
FBgn0005677	dac	0.102591	0.772595
FBgn0005683	pie	0.0282031	0.961695
FBgn0005694	Aef1	-0.0634711	0.747031
FBgn0005695	gcl	0.0188444	0.92726
FBgn0005696	PolA2	-0.181026	0.768847
FBgn0005771	noc	-0.218905	0.113126
FBgn0005775	Con	0.229784	0.442816
FBgn0005777	PpD3	-0.0147472	0.957133
FBgn0008635	betaCOP	-0.202511	0.302705
FBgn0008636	hbn	0.167377	0.529875
FBgn0008646	E5	-0.237112	0.418018
FBgn0008651	lbl	-0.0805953	0.829626
FBgn0010014	CanB	0.0295905	0.881325
FBgn0010015	CanA1	-0.0279735	0.941598
FBgn0010019	Cyp4g1	0.714401	0.66262
FBgn0033042	Tsp42A	4.45589	0.00527865	Short SD Up
FBgn0010039	GstD3	-0.631999	0.118363
FBgn0029606	CG14052	4.43246	0.000214275	Short SD Up
FBgn0004400	rhi	4.3279	9.54988e-06	Short SD Up
FBgn0010042	GstD6	-1.52123	0.134531
FBgn0010043	GstD7	-2.12252	0.100468
FBgn0010044	GstD8	-0.454915	0.309276
FBgn0010051	Itpr	0.178025	0.416995
FBgn0010052	Jhe	-0.537322	0.759457
FBgn0010053	Jheh1	-1.24997	0.0522576
FBgn0010078	RpL23	-0.295451	0.499335
FBgn0010097	gammaTub37C	0.88551	NA
FBgn0010100	mAcon1	-0.207422	0.490704
FBgn0010105	comm	-0.0265227	0.895516
FBgn0010109	dpn	-0.404111	0.668531
FBgn0010113	hdc	0.394654	0.31483
FBgn0010114	hig	0.00414624	0.991118
FBgn0010173	RPA1	-0.192055	0.0357318
FBgn0010194	Wnt5	0.0738891	0.729402
FBgn0010197	Gyc32E	-0.187937	0.632187
FBgn0010198	RpS15Aa	-0.177577	0.67829
FBgn0010213	Sod2	-0.310623	0.185143
FBgn0010215	alpha-Cat	0.051454	0.805638
FBgn0010217	ATPsynbeta	-0.13147	0.727443
FBgn0010220	Dbp45A	0.245486	0.104192
FBgn0010222	Nmdmc	-0.211299	0.804607
FBgn0010223	Galphaf	-0.0118366	0.987215
FBgn0010225	Gel	-0.439328	0.444197
FBgn0010226	GstS1	-0.00502899	0.995803
FBgn0010228	HmgZ	0.0701039	0.855056
FBgn0010235	Klc	0.0987506	0.51271
FBgn0010238	Lac	-0.407173	0.0609915
FBgn0010240	Lcch3	0.0798094	0.739891
FBgn0010241	Mdr50	-0.911803	0.492387
FBgn0010246	Myo61F	0.0145677	0.991133
FBgn0010247	Parp	0.265289	0.217767
FBgn0010258	Rbp4	-0.297992	0.671442
FBgn0010263	Rbp9	-0.271905	0.121827
FBgn0010265	RpS13	-0.366919	0.284647
FBgn0010269	Dsor1	0.148576	0.584725
FBgn0010278	Ssrp	0.277437	0.476387
FBgn0010280	Taf4	0.0419122	0.882856
FBgn0010282	TfIIFalpha	0.185631	0.558563
FBgn0010287	Trf	0.14553	0.569667
FBgn0010288	Uch	0.451858	0.0773461
FBgn0010292	bys	-0.0683876	0.718633
FBgn0010294	ng2	1.17151	NA
FBgn0010300	brat	0.341721	0.313544
FBgn0010303	hep	0.0469876	0.848953
FBgn0010309	pigeon	-0.00116486	0.997077
FBgn0010313	corto	-0.0993833	0.660095
FBgn0010314	Cks30A	0.505175	0.529875
FBgn0010315	CycD	-0.243652	0.498122
FBgn0010316	dap	-0.525817	0.134029
FBgn0010317	CycJ	-0.234183	0.492387
FBgn0010323	Gsc	0.255407	0.499111
FBgn0010328	woc	-0.0765019	0.775825
FBgn0010329	Tbh	0.0166066	0.965653
FBgn0010333	Rac1	0.0534047	0.778465
FBgn0010339	128up	0.118619	0.54012
FBgn0010340	140up	0.0455678	0.850426
FBgn0010341	Cdc42	-0.119294	0.45307
FBgn0010342	Map60	0.0212729	0.958368
FBgn0010348	Arf1	-0.158388	0.183907
FBgn0010350	Cds	-0.299966	0.406648
FBgn0010352	Ogdh	-0.151306	0.567447
FBgn0010355	Taf1	0.16248	0.370537
FBgn0010356	Taf5	-0.184517	0.112422
FBgn0010379	Akt	-0.0662249	0.781848
FBgn0010380	AP-1-2beta	-0.055921	0.66087
FBgn0032754	CG10700	4.31703	1.37692e-05	Short SD Up
FBgn0010383	Cyp18a1	-0.0648084	0.964536
FBgn0010385	Def	-0.0502595	0.9457
FBgn0010387	Acbp2	-0.109482	0.894633
FBgn0010388	Dro	-0.140525	0.925647
FBgn0010389	htl	0.155721	0.63882
FBgn0010391	SrpRalpha	-0.0210321	0.935154
FBgn0010395	Itgbn	-0.745089	0.141342
FBgn0010397	LamC	-0.319278	0.0970487
FBgn0010398	Lrr47	0.0887632	0.728844
FBgn0010399	Nmdar1	0.328698	0.202172
FBgn0010401	Os-C	-0.16448	0.941598
FBgn0010403	Obp83b	0.268955	0.882856
FBgn0010406	RNaseX25	-0.185508	0.509519
FBgn0010407	Ror	0.109933	0.773685
FBgn0010408	RpS9	-0.260033	0.523402
FBgn0010409	RpL18A	-0.212468	0.545952
FBgn0010411	RpS18	-0.20977	0.585188
FBgn0010412	RpS19a	-0.157824	0.691633
FBgn0010414	SerT	-0.173881	0.281731
FBgn0010415	Sdc	0.0978134	0.726232
FBgn0010416	TH1	-0.162994	0.309276
FBgn0010417	Taf6	-0.397028	0.00220064
FBgn0010421	TfIIFbeta	-0.0363447	0.814974
FBgn0010422	TfIIS	0.0279804	0.881599
FBgn0010423	TpnC47D	0.899897	0.372326
FBgn0010424	TpnC73F	0.576399	0.020965
FBgn0010431	mtrm	1.79957	0.0812507
FBgn0010433	ato	0.362776	0.530522
FBgn0010434	cora	-0.165548	0.214359
FBgn0010435	emp	-0.737238	0.0597992
FBgn0010438	mtSSB	-0.174999	0.608896
FBgn0010441	pll	-0.185392	0.317794
FBgn0010452	trn	0.0689614	0.646117
FBgn0010453	Wnt4	0.29238	0.146454
FBgn0010470	Fkbp14	-0.448657	0.290522
FBgn0010473	tutl	0.197391	0.423097
FBgn0010482	hlk	0.233342	0.410426
FBgn0010488	NAT1	-0.0686991	0.725086
FBgn0010497	dmGlut	0.204118	0.738801
FBgn0010501	Dcp-1	0.0977446	0.765859
FBgn0036414	nan	4.30917	0.000139268	Short SD Up
FBgn0010516	wal	-0.157391	0.734872
FBgn0010520	Bka	0.119352	0.592208
FBgn0010531	Ccs	0.087244	0.654086
FBgn0010548	Aldh-III	-0.462534	0.0319293
FBgn0010549	l(2)03659	0.855611	0.414758
FBgn0010551	Phb2	-0.133754	0.27502
FBgn0010583	dock	0.0729016	0.697754
FBgn0010590	Prosbeta1	0.114205	0.724618
FBgn0010591	Sply	-0.15811	0.526686
FBgn0010602	lwr	0.00178782	0.995196
FBgn0010607	l(2)05714	0.0101761	0.9741
FBgn0010611	Hmgs	-0.211054	0.430275
FBgn0010612	ATPsynG	-0.0968285	0.787452
FBgn0010620	CG10939	-0.546043	0.00530377
FBgn0010621	CCT5	-0.0734705	0.781405
FBgn0010622	DCTN3-p24	0.12855	0.568418
FBgn0010638	Sec61beta	-0.0274516	0.915216
FBgn0010651	MFS14	-0.253863	0.569667
FBgn0010660	Nup214	-0.0990614	0.685537
FBgn0010741	Pfdn2	0.185903	0.401714
FBgn0010747	Srp54k	-0.0516682	0.77174
FBgn0010750	atms	0.0534067	0.785182
FBgn0010762	simj	0.609299	0.124394
FBgn0010768	sqz	-0.00539994	0.987091
FBgn0010770	ppan	0.109519	0.61813
FBgn0010772	Xe7	0.199695	0.566132
FBgn0010774	Ref1	0.0311759	0.830069
FBgn0010786	l(3)02640	-0.115136	0.488909
FBgn0010803	TrpRS	-0.114987	0.361938
FBgn0010808	Chchd3	-0.0912159	0.738201
FBgn0010825	Gug	0.0242053	0.953321
FBgn0010830	l(3)04053	0.0081495	0.981266
FBgn0010877	l(3)05822	-0.0607398	0.685421
FBgn0010894	sinu	-0.171556	0.345305
FBgn0010905	Spn	-0.130468	0.727398
FBgn0010909	msn	0.162328	0.330778
FBgn0010926	l(3)07882	0.0616356	0.770641
FBgn0011016	SsRbeta	-0.0242067	0.939217
FBgn0011020	Sas-4	-0.030934	0.941447
FBgn0011202	dia	0.0271031	0.922268
FBgn0011204	cue	-0.169695	0.52691
FBgn0011205	fbl	-0.181216	0.653174
FBgn0011206	bol	0.197137	0.563877
FBgn0011207	pelo	-0.00518123	0.983101
FBgn0011211	blw	-0.183884	0.626188
FBgn0011217	eff	-0.28618	0.163095
FBgn0011224	heph	0.184733	0.513538
FBgn0011225	jar	-0.128307	0.440896
FBgn0011227	ox	0.293546	0.27309
FBgn0011230	poe	-0.0591535	0.754463
FBgn0011232	scat	-0.0477514	0.771359
FBgn0011236	ken	-0.576515	0.0826698
FBgn0011259	Sema1a	0.201846	0.552231
FBgn0011260	Sema2a	-0.0144301	0.95628
FBgn0011270	Pglym87	-0.416414	0.866693
FBgn0011272	RpL13	-0.106719	0.724618
FBgn0011274	Dif	-0.359354	0.0901944
FBgn0011276	HLH3B	0.112533	0.757882
FBgn0011277	HLH4C	0.567755	0.101634
FBgn0011278	lbe	-1.2869	0.398255
FBgn0011279	Obp69a	-0.00284279	0.997302
FBgn0011280	Obp19d	-0.641702	0.00475665
FBgn0011281	Obp83a	0.0759852	0.967881
FBgn0011282	Obp84a	0.935564	0.552231
FBgn0011283	Obp28a	-0.0905614	0.943702
FBgn0011284	RpS4	-0.12531	0.750968
FBgn0011286	RyR	0.409846	0.00258898
FBgn0011288	Snap25	0.321787	0.15057
FBgn0011289	TfIIA-L	-0.107164	0.372374
FBgn0011290	Taf12	0.0407338	0.891548
FBgn0011291	Taf11	0.0940845	0.785182
FBgn0011293	a10	0.43555	0.835588
FBgn0011294	a5	0.256168	0.929803
FBgn0011296	l(2)efl	0.313852	0.374422
FBgn0011297	Alg3	-0.181553	0.480415
FBgn0011300	babo	-0.0310903	0.881412
FBgn0011305	Rsf1	0.0432029	0.812382
FBgn0011327	Uch-L5	0.185276	0.691792
FBgn0011335	vers	0.302444	0.125683
FBgn0011336	Stt3B	-0.258457	0.453013
FBgn0011361	ND-ACP	0.0309085	0.952749
FBgn0011455	ND-SGDH	0.117276	0.68257
FBgn0011474	PR-Set7	0.0867434	0.798584
FBgn0011476	l(3)neo43	0.0891946	0.834906
FBgn0011481	Ssdp	0.245855	0.234741
FBgn0011509	SrpRbeta	0.216928	0.0956092
FBgn0011559	Acp36DE	-0.0958968	0.960059
FBgn0011566	Smyd3	0.125939	0.574987
FBgn0011569	can	-1.69665	0.150689
FBgn0011570	cpb	0.0649276	0.630945
FBgn0011573	Cdc37	0.0168475	0.949695
FBgn0011576	Cyp4d2	0.191271	0.480394
FBgn0011581	Ms	0.255221	0.632776
FBgn0011582	Dop1R1	0.156636	0.605331
FBgn0011584	Trp1	-0.163649	0.526705
FBgn0011586	e(r)	0.03032	0.886568
FBgn0011589	Elk	0.184183	0.559693
FBgn0011591	fng	0.0629708	0.776502
FBgn0011592	fra	0.105276	0.748771
FBgn0011596	fzo	0.10627	0.923004
FBgn0011603	ine	-0.157512	0.71616
FBgn0011604	Iswi	0.095202	0.66087
FBgn0011606	Klp3A	-0.15586	0.650137
FBgn0011638	La	-0.0792785	0.644094
FBgn0011640	lark	0.0235419	0.929577
FBgn0011642	Zyx	0.203722	0.281721
FBgn0011648	Mad	-0.156373	0.310863
FBgn0011655	Med	-0.0526849	0.845567
FBgn0011656	Mef2	-0.00488191	0.984813
FBgn0011659	Mlh1	-0.136685	0.630995
FBgn0011660	Pms2	0.146753	0.669207
FBgn0011661	Moe	0.00899729	0.967826
FBgn0011666	msi	-0.0731878	0.814013
FBgn0011672	Mvl	-0.134811	0.51017
FBgn0011674	insc	-0.395705	0.25802
FBgn0011676	Nos	0.170163	0.515218
FBgn0011692	pav	-0.30771	0.788209
FBgn0011693	Pdh	-0.275044	0.525387
FBgn0011695	EbpIII	-0.576267	0.0981174
FBgn0011701	repo	-0.0557461	0.742513
FBgn0011703	RnrL	-0.401038	0.297403
FBgn0011704	RnrS	-0.434773	0.408039
FBgn0011705	rost	-0.131093	0.931037
FBgn0011706	rpr	0.368131	0.306814
FBgn0011708	Syx5	-0.204365	0.000480615
FBgn0011710	Septin1	-0.0282956	0.842383
FBgn0011715	Snr1	0.17172	0.476387
FBgn0011722	Tig	-0.182185	0.77876
FBgn0011723	byn	-1.14139	0.551893
FBgn0011725	twin	0.090663	0.597102
FBgn0011726	tsr	0.11657	0.476387
FBgn0011737	Wee1	0.0916446	0.64646
FBgn0011739	wts	-0.0851735	0.717201
FBgn0011740	alpha-Man-IIa	0.145964	0.367772
FBgn0011741	Arp6	0.229752	0.18664
FBgn0011742	Arp2	-0.0540956	0.820929
FBgn0011745	Arp1	0.00807408	0.976617
FBgn0011746	ana	0.00635191	0.987091
FBgn0011747	Ank	0.150914	0.418828
FBgn0011754	PhKgamma	0.0156821	0.943702
FBgn0011758	B-H1	-0.15777	0.676957
FBgn0011760	ctp	-0.0768724	0.749623
FBgn0011761	dhd	2.4322	0.25199
FBgn0011762	Prim1	0.157255	0.608896
FBgn0011763	Dp	-0.000349242	0.998454
FBgn0011766	E2f1	0.00916798	0.981871
FBgn0011768	Fdh	-0.456581	0.355319
FBgn0011769	Fdx1	0.151859	0.63941
FBgn0011770	Gip	-0.431605	0.580117
FBgn0011771	Hem	0.0476433	0.738801
FBgn0011774	Irbp	-0.136714	0.666102
FBgn0011785	BRWD3	-0.0843937	0.697754
FBgn0011787	mRpL12	-0.0326517	0.902238
FBgn0011802	Gem3	-0.0283057	0.949516
FBgn0011817	nmo	0.482874	0.0753562
FBgn0011818	oaf	0.650798	0.020965
FBgn0011824	CG4038	-0.328892	0.295962
FBgn0011826	Pp2B-14D	0.0955559	0.606379
FBgn0011828	Pxn	0.033917	0.894611
FBgn0011829	Ret	-0.195368	0.534891
FBgn0011836	Taf2	0.0232329	0.947091
FBgn0011837	Tis11	0.168051	0.694836
FBgn0011889	tRNA:Lys-CTT-1-2	0.730401	0.599764
FBgn0012034	AcCoAS	-0.222001	0.629028
FBgn0012036	Aldh	-0.40736	0.532271
FBgn0012037	Ance	0.21546	0.685537
FBgn0012042	AttA	-1.72913	0.216207
FBgn0012051	CalpA	-0.0929091	0.465209
FBgn0012058	Cdc27	-0.0245958	0.893161
FBgn0012344	Dh44	-0.0334828	0.941598
FBgn0013263	Trl	-0.202844	0.657574
FBgn0013269	Fkbp39	-0.102068	0.685164
FBgn0013272	Gp150	-0.506346	0.208619
FBgn0013275	Hsp70Aa	-0.14079	0.941598
FBgn0013276	Hsp70Ab	-0.180544	0.925854
FBgn0038450	CG17560	4.29962	0.00157182	Short SD Up
FBgn0013278	Hsp70Bb	-0.625218	0.642248
FBgn0013279	Hsp70Bc	0.132924	0.873978
FBgn0013303	Nca	0.272063	0.266085
FBgn0013305	Nmda1	-0.241244	0.433245
FBgn0013307	Odc1	-0.146569	0.919205
FBgn0013308	Odc2	-1.06806	0.505883
FBgn0013323	Ptth	0.378849	0.443968
FBgn0013325	RpL11	-0.00319785	0.996924
FBgn0013334	Sap47	0.314403	0.120639
FBgn0013342	nSyb	-0.150965	0.307813
FBgn0013343	Syx1A	0.386452	0.201355
FBgn0013347	TfIIA-S	0.0359048	0.897077
FBgn0013348	TpnC41C	0.0234249	0.980034
FBgn0013432	bcn92	-0.00819046	0.985413
FBgn0013433	beat-Ia	0.0878368	0.756159
FBgn0013435	Cdc2rk	0.139113	0.395262
FBgn0013467	igl	0.091859	0.676858
FBgn0013469	klu	0.0273568	0.961772
FBgn0013531	MED20	-0.00517861	0.985174
FBgn0013548	l(2)dtl	0.0678832	0.857561
FBgn0013563	Pex1	-0.155074	0.591102
FBgn0013576	mtd	0.0447479	0.846915
FBgn0013672	mt:ATPase6	-0.389545	0.646798
FBgn0013674	mt:CoI	-0.0416209	0.965189
FBgn0013675	mt:CoII	0.0715658	0.94852
FBgn0013676	mt:CoIII	0.0019579	0.998177
FBgn0013678	mt:Cyt-b	-0.27168	0.772007
FBgn0013679	mt:ND1	-0.630994	0.342546
FBgn0013680	mt:ND2	-1.19568	0.111482
FBgn0013681	mt:ND3	-1.10428	0.29147
FBgn0013683	mt:ND4L	0.640591	0.467392
FBgn0013684	mt:ND5	-0.625454	0.405109
FBgn0013685	mt:ND6	-0.498378	0.67829
FBgn0013686	mt:lrRNA	0.10778	0.915571
FBgn0013688	mt:srRNA	-0.321748	0.775276
FBgn0013703	mt:tRNA:Gln-TTG	0.582598	0.657894
FBgn0013707	mt:tRNA:Thr-TGT	-0.545321	0.745603
FBgn0013710	mt:tRNA:Tyr-GTA	-0.43623	0.748056
FBgn0013717	not	-0.088948	0.492769
FBgn0013718	nuf	-0.268674	0.30276
FBgn0013720	pck	-0.193951	0.353627
FBgn0013725	phyl	0.164374	0.59876
FBgn0013726	pnut	-0.0113314	0.975418
FBgn0013732	sced	0.153259	0.498379
FBgn0013733	shot	-0.12259	0.541425
FBgn0013746	alien	0.0447668	0.846626
FBgn0013749	Arf4	0.123865	0.661178
FBgn0013750	Arf6	-0.0120621	0.956135
FBgn0013751	Awh	0.13581	0.641439
FBgn0013753	Bgb	0.148863	0.613306
FBgn0013756	Mtor	-0.118716	0.567829
FBgn0013759	CASK	0.0743371	0.822135
FBgn0013762	Cdk5	-0.0885743	0.579926
FBgn0013763	Idgf6	0.0443658	0.977531
FBgn0013764	Chi	-0.0330999	0.890335
FBgn0013765	cnn	-0.0982571	0.542964
FBgn0013767	Crz	0.601205	0.12215
FBgn0013770	Cp1	-0.295495	0.419449
FBgn0013771	Cyp6a9	-0.540176	0.0868058
FBgn0034296	CG10912	4.26088	0.00705233	Short SD Up
FBgn0037590	Or85b	4.24338	3.26332e-05	Short SD Up
FBgn0013799	Deaf1	0.234711	0.237066
FBgn0013810	Dhc36C	0.698798	0.0733054
FBgn0013811	Dhc62B	0.285793	0.610075
FBgn0013812	Dhc93AB	-0.125991	0.6725
FBgn0013813	Dhc98D	0.483581	0.4514
FBgn0013949	Elal	0.0106776	0.993305
FBgn0013953	Esp	0.0806835	0.894633
FBgn0013954	Fkbp12	-0.118046	0.657982
FBgn0013972	Gycalpha99B	0.367167	0.0541558
FBgn0013973	Gycbeta100B	0.0935065	0.730482
FBgn0013981	His4r	0.101328	0.802044
FBgn0013983	imd	-0.244704	0.297247
FBgn0013987	MAPk-Ak2	-0.182165	0.198159
FBgn0013995	Calx	-0.103175	0.674126
FBgn0013997	Nrx-IV	-0.217396	0.168628
FBgn0014000	Hf	-0.508219	0.578885
FBgn0014006	Ask1	-0.0640176	0.71616
FBgn0014007	Ptp69D	0.121053	0.595163
FBgn0014009	Rab2	-0.0882181	0.492098
FBgn0014010	Rab5	-0.131871	0.469277
FBgn0014011	Rac2	-0.11417	0.777507
FBgn0014018	Rel	-0.453667	0.0560077
FBgn0014019	Rh5	-0.473491	0.574519
FBgn0014020	Rho1	-0.169484	0.327335
FBgn0014022	Rlb1	0.127742	0.412876
FBgn0014023	mRpL47	0.0915666	0.697194
FBgn0014024	Rnp4F	0.0119376	0.97785
FBgn0014026	RpL7A	-0.100491	0.773759
FBgn0014028	SdhB	-0.0911835	0.703024
FBgn0014029	Septin2	0.0168097	0.959784
FBgn0014031	Agxt	-0.43331	0.658933
FBgn0014032	Sptr	-0.148342	0.427757
FBgn0014033	Sr-CI	-0.434198	0.650716
FBgn0014037	Su(Tpl)	0.121897	0.584242
FBgn0014073	Tie	-0.229875	0.405466
FBgn0014075	Uggt	-0.0641304	0.870319
FBgn0014076	Vm32E	1.65753	0.409436
FBgn0014092	CG4278	0.0601364	0.81762
FBgn0014127	barr	0.102617	0.788209
FBgn0014133	bif	-0.00234975	0.994718
FBgn0003863	alphaTry	4.01945	0.00922738	Short SD Up
FBgn0014141	cher	-0.134264	0.745603
FBgn0014143	croc	0.0581412	0.881325
FBgn0014163	fax	0.045854	0.896074
FBgn0014179	gcm	0.669875	0.119758
FBgn0014184	Oda	-0.110894	0.736233
FBgn0014189	Hel25E	0.115029	0.604058
FBgn0014269	prod	0.0131584	0.953321
FBgn0014340	mof	-0.0873372	0.748278
FBgn0014342	mia	0.112151	0.743654
FBgn0014343	mirr	0.10975	0.6725
FBgn0014366	noi	0.0301164	0.870713
FBgn0014368	nol	0.176754	0.790576
FBgn0014380	RhoL	-0.184146	0.364825
FBgn0014388	sty	0.266031	0.316467
FBgn0014391	sun	0.134293	0.749984
FBgn0250815	Jon65Aiv	4.01655	0.0020235	Short SD Up
FBgn0014396	tim	-0.313269	0.59876
FBgn0014411	Vps26	-0.0155164	0.901302
FBgn0014417	CG13397	-0.250936	0.706121
FBgn0014427	CG11899	-0.0424567	0.961695
FBgn0014454	Acp1	-1.23406	0.434557
FBgn0014455	Ahcy	0.190563	0.734872
FBgn0014464	Cp7Fa	0.650838	0.0781156
FBgn0036311	CG17666	3.93201	0.000420778	Short SD Up
FBgn0014466	Cp7Fc	1.5784	0.0898043
FBgn0014469	Cyp4e2	-0.556395	0.600094
FBgn0014857	His3.3A	0.130298	0.581148
FBgn0014859	Hr38	-0.141067	0.815075
FBgn0014861	Mcm2	-0.44319	0.406512
FBgn0014863	Mlp84B	-0.109905	0.894721
FBgn0014865	Mtk	-0.674028	0.665596
FBgn0014868	Ost48	-0.066314	0.851002
FBgn0014869	Pglym78	-0.104531	0.696612
FBgn0014870	Psi	0.113406	0.722898
FBgn0014877	Roe1	-0.165354	0.227211
FBgn0014879	Set	-0.0346256	0.874287
FBgn0014906	Hydr2	-0.137038	0.394726
FBgn0014930	CG2846	-0.152097	0.672203
FBgn0014931	CG2678	-0.397547	0.643869
FBgn0015000	betaggt-I	-0.0895551	0.529093
FBgn0015001	iotaTry	-0.43309	0.845813
FBgn0039343	CG5111	3.91084	0.000297946	Short SD Up
FBgn0015011	AhcyL2	-0.480698	0.161057
FBgn0015019	CCT3	-0.0768384	0.724779
FBgn0015024	CkIalpha	0.093762	0.689138
FBgn0015025	CkIIalpha-i1	-0.0453453	0.870319
FBgn0015031	cype	0.0847906	0.785182
FBgn0015032	Cyp4c3	-0.989973	0.0245708
FBgn0015033	Cyp4d8	-0.702206	0.29609
FBgn0015034	Cyp4e1	0.664641	0.383857
FBgn0052762	CG32762	3.7979	0.00085223	Short SD Up
FBgn0015036	Cyp4ae1	0.196063	0.672426
FBgn0015037	Cyp4p1	-0.0942116	0.916648
FBgn0015038	Cyp9b1	-0.872936	0.412977
FBgn0015039	Cyp9b2	-0.227113	0.897077
FBgn0015040	Cyp9c1	0.499267	0.127024
FBgn0015075	Ddx1	-0.0260769	0.904229
FBgn0015218	eIF4E1	-0.0919521	0.38156
FBgn0015221	Fer2LCH	0.0454919	0.855241
FBgn0015222	Fer1HCH	-0.153774	0.382965
FBgn0015229	glec	-0.0265935	0.914811
FBgn0015239	Hr78	-0.0281662	0.865544
FBgn0015240	Hr96	-0.00156009	0.994735
FBgn0015245	Hsp60A	-0.0593414	0.755266
FBgn0015247	Diap2	0.11022	0.397068
FBgn0015268	Nap1	0.00870519	0.98016
FBgn0015269	Nf1	0.0318444	0.913986
FBgn0015270	Orc2	-0.269706	0.775752
FBgn0038565	CG7794	3.78202	2.98422e-06	Short SD Up
FBgn0015277	Pi3K59F	0.112485	0.497294
FBgn0015278	Pi3K68D	-0.223062	0.392559
FBgn0015279	Pi3K92E	-0.0429567	0.842433
FBgn0015282	Rpt2	0.191154	0.604058
FBgn0015283	Rpn10	0.208943	0.4655
FBgn0015286	Rala	-0.023398	0.932728
FBgn0015288	RpL22	-0.124919	0.767538
FBgn0015295	Shark	-0.155995	0.62722
FBgn0015296	Shc	-0.0462631	0.757882
FBgn0015298	Srp19	0.0196241	0.950368
FBgn0015299	Ssb-c31a	0.840564	0.021606
FBgn0015300	Ssl	-0.316924	0.897077
FBgn0015316	Try29F	0.158221	0.687107
FBgn0015320	Ubc2	-0.136356	0.265855
FBgn0015321	Ubc4	-0.0625759	0.511337
FBgn0015331	abs	-0.0969042	0.649476
FBgn0265689	lncRNA:CR44496	3.7378	0.00289335	Short SD Up
FBgn0015338	CG5861	-0.0485171	0.894832
FBgn0015351	Mettl4	-0.0152409	0.973198
FBgn0015359	CG2034	-0.0349494	0.853558
FBgn0015360	oxt	0.112931	0.550335
FBgn0015371	chn	0.12089	0.668559
FBgn0015372	RabX1	-0.15912	0.374422
FBgn0015376	cutlet	-0.237438	0.63366
FBgn0015379	dod	-0.0208982	0.941598
FBgn0015380	drl	0.276013	0.159138
FBgn0267278	asRNA:CR45714	3.701	2.98422e-06	Short SD Up
FBgn0015391	glu	0.0770993	0.813657
FBgn0015396	jumu	0.0347823	0.935154
FBgn0015399	kek1	0.444424	0.124516
FBgn0015400	kek2	0.0423053	0.88922
FBgn0015402	ksr	0.0436737	0.848953
FBgn0015477	Rme-8	0.106105	0.548976
FBgn0015509	Cul1	0.109158	0.21747
FBgn0015513	mbc	-0.224141	0.440547
FBgn0015519	nAChRalpha3	0.587055	0.0696154
FBgn0015520	nonA-l	0.0140683	0.95922
FBgn0015521	RpS21	-0.051717	0.917016
FBgn0015522	olf186-M	-0.19116	0.753491
FBgn0015524	otp	0.157816	0.695903
FBgn0015527	peng	-0.0844288	0.749432
FBgn0015543	snoRNA:Me28S-A1322	-0.424067	0.418511
FBgn0015544	spag	0.35025	0.063034
FBgn0015546	spel1	0.114616	0.606379
FBgn0015550	tap	1.2934	0.151065
FBgn0015553	tos	-0.0133773	0.986501
FBgn0015558	tty	0.177662	0.568097
FBgn0015561	unpg	0.421551	0.411727
FBgn0015568	alpha-Est1	-0.401653	0.493549
FBgn0033501	CG12911	3.69287	1.88026e-09	Short SD Up
FBgn0015570	alpha-Est2	-0.42592	0.67823
FBgn0015571	alpha-Est3	-0.287548	0.473375
FBgn0015572	alpha-Est4	-0.217056	0.673379
FBgn0015575	alpha-Est7	-0.55671	0.360984
FBgn0015576	alpha-Est8	-0.542749	0.253225
FBgn0015577	alpha-Est9	-0.214468	0.239984
FBgn0015582	dare	-0.0305865	0.917675
FBgn0015584	Acp53Ea	0.527496	0.811136
FBgn0015585	Acp63F	-1.56469	0.296662
FBgn0015589	Apc	-0.0821967	0.756634
FBgn0015591	AstA	0.017112	0.955783
FBgn0015600	toc	-0.0335405	0.885995
FBgn0015602	BEAF-32	-0.038397	0.841004
FBgn0015609	CadN	0.348927	0.0777926
FBgn0015614	CanB2	0.270507	0.0687853
FBgn0015615	SMC3	-0.0868056	0.665956
FBgn0015618	Cdk8	-0.0240058	0.958109
FBgn0015621	Clp	-0.0908445	0.767486
FBgn0015622	Cnx99A	-0.328968	0.51014
FBgn0015623	Cpr	0.790334	0.458955
FBgn0015625	CycB3	0.267657	0.700562
FBgn0015663	Ugt36A1	-0.299383	0.534868
FBgn0015664	Dref	0.100303	0.455769
FBgn0015714	Cyp6a17	-1.06277	0.373506
FBgn0015721	ktub	0.0815401	0.681927
FBgn0015737	Hmu	0.0956302	0.841004
FBgn0015754	Lis-1	-0.0638137	0.726134
FBgn0015756	RpL9	-0.0439026	0.939081
FBgn0015765	p38a	0.0722504	0.755266
FBgn0015766	Msr-110	-0.344819	0.297855
FBgn0015772	Nak	-0.119959	0.482613
FBgn0015773	NetA	-0.588946	0.0982348
FBgn0015774	NetB	0.325182	0.27309
FBgn0015776	nrv1	-0.480534	0.398255
FBgn0015777	nrv2	-0.167557	0.63546
FBgn0015778	rin	0.0551934	0.847817
FBgn0015781	P5cr	0.0780376	0.666532
FBgn0015789	Rab10	-0.130881	0.481303
FBgn0015790	Rab11	-0.0717933	0.481082
FBgn0015791	Rab14	0.504143	0.0023203
FBgn0015793	Rab19	0.145607	0.535098
FBgn0015794	Rab18	-0.168703	0.535876
FBgn0015795	Rab7	-0.12128	0.644094
FBgn0015797	Rab6	-0.188572	0.0622659
FBgn0015799	Rbf	-0.141621	0.386253
FBgn0015801	Reg-5	-0.447163	0.166527
FBgn0015803	RtGEF	-0.0458456	0.78632
FBgn0015805	HDAC1	-0.133187	0.634428
FBgn0015808	ScpX	-0.326819	0.276811
FBgn0015818	Spx	-0.0329329	0.900561
FBgn0015828	TfIIEalpha	0.0310234	0.886683
FBgn0015829	TfIIEbeta	0.0202382	0.891385
FBgn0015831	Rtnl2	0.156467	0.94367
FBgn0015834	eIF3i	-0.127026	0.63366
FBgn0015838	Vang	0.170841	0.340749
FBgn0015872	Drip	-0.224451	0.691672
FBgn0015903	apt	-0.376097	0.066992
FBgn0015904	ara	0.073999	0.781064
FBgn0015905	ast	-0.176427	0.55619
FBgn0015919	caup	0.0551007	0.827565
FBgn0015924	crq	-0.363242	0.306631
FBgn0015925	csul	0.0996598	0.694906
FBgn0015926	dah	-0.10655	0.897077
FBgn0015929	dpa	-0.562854	0.0792913
FBgn0015946	grim	0.0249048	0.969986
FBgn0015949	hrg	-0.0207982	0.944429
FBgn0016013	Faa	-0.412944	0.42927
FBgn0016031	lama	0.259748	0.850426
FBgn0016032	lbm	0.106702	0.35265
FBgn0016034	mael	0.729913	0.0621806
FBgn0016036	mei-P22	0.479328	0.640066
FBgn0016038	Vsp37A	-0.0138952	0.960257
FBgn0016041	Tom40	0.146922	0.470814
FBgn0016047	nompA	-0.29599	0.44592
FBgn0016053	pgc	1.14583	0.405466
FBgn0016054	phr6-4	0.218376	0.584285
FBgn0016059	Sema1b	-0.0456563	0.866177
FBgn0016061	side	0.469341	0.0271675
FBgn0016070	smg	0.0733983	0.797562
FBgn0016075	vkg	-0.57234	0.206315
FBgn0016076	vri	-0.0969424	0.90419
FBgn0016078	wun	-0.149489	0.111508
FBgn0016081	fry	-0.0683269	0.755356
FBgn0016119	ATPsynCF6	0.0723014	0.84632
FBgn0016120	ATPsynD	-0.0331984	0.936941
FBgn0016122	Acer	-0.584637	0.412977
FBgn0016123	Alp4	-0.251403	0.287669
FBgn0016126	CaMKI	0.101682	0.632767
FBgn0016131	Cdk4	0.141599	0.861784
FBgn0016641	PTP-ER	0.0380863	0.872206
FBgn0016650	Lgr1	-0.201048	0.568097
FBgn0016660	H15	-0.118279	0.68257
FBgn0016672	Ipp	0.0277519	0.94199
FBgn0016675	Lectin-galC1	0.200232	0.859537
FBgn0016684	NaPi-T	-0.108258	0.880941
FBgn0016685	Nlp	0.0874522	0.707492
FBgn0016687	Nurf-38	-0.331393	0.262404
FBgn0016691	ATPsynO	-0.0829788	0.82966
FBgn0016693	Past1	-0.156456	0.483031
FBgn0016694	Pdp1	0.307694	0.154754
FBgn0016696	Pitslre	0.0602253	0.902296
FBgn0016697	Prosalpha5	0.0909699	0.822876
FBgn0016698	Ptpa	0.0751583	0.742339
FBgn0016701	Rab4	0.216795	0.1413
FBgn0016715	Reg-2	-0.490098	0.451252
FBgn0016726	RpL29	0.0147349	0.980563
FBgn0016754	sba	-0.0506392	0.848858
FBgn0016756	Usp47	-0.0506463	0.760486
FBgn0016762	angel	0.0586418	0.821854
FBgn0016794	dos	0.067675	0.703864
FBgn0016797	fz2	-0.0673057	0.845574
FBgn0016917	Stat92E	-0.182948	0.644098
FBgn0021742	C901	3.69158	4.3713e-05	Short SD Up
FBgn0016920	nompC	-0.000803484	0.998046
FBgn0016926	Pino	-0.271975	0.147893
FBgn0016930	Dyrk2	-0.120322	0.658043
FBgn0016970	l(2)k10201	0.130483	0.722898
FBgn0016974	swaPsi	-1.27086	0.0508353
FBgn0016977	spen	0.415604	0.202598
FBgn0016978	snRNP-U1-70K	0.232915	0.178297
FBgn0016983	smid	-0.0378668	0.837014
FBgn0016984	sktl	0.0112641	0.974759
FBgn0017414	cag	0.272305	0.326204
FBgn0017418	ari-1	-0.0264157	0.908856
FBgn0017424	asRNA:CR11538	-0.265155	0.941598
FBgn0017429	CG5989	0.00124782	0.996924
FBgn0017430	Nelf-E	0.0300637	0.924403
FBgn0017456	Ubc84D	-0.585291	0.492427
FBgn0017457	U2af38	0.0278362	0.941447
FBgn0017482	T3dh	-0.391553	0.563179
FBgn0017545	RpS3A	-0.086666	0.845813
FBgn0017550	Rga	0.0781415	0.701125
FBgn0017551	Rca1	0.036353	0.91472
FBgn0017556	Prosalpha4T2	0.239127	0.909554
FBgn0017558	Pdk	0.238597	0.429851
FBgn0017561	Ork1	-0.340845	0.253902
FBgn0017566	ND-75	-0.0568639	0.827177
FBgn0017567	ND-23	0.0758334	0.762037
FBgn0017572	Mo25	-0.17401	0.308844
FBgn0017577	Mcm5	-0.110934	0.80623
FBgn0017578	Max	0.157616	0.490057
FBgn0017579	RpL14	-0.208737	0.567829
FBgn0017581	Lk6	-0.210909	0.582002
FBgn0017590	klg	0.378966	0.135772
FBgn0019624	COX5A	-0.229745	0.466628
FBgn0019637	Atu	-0.0287922	0.923788
FBgn0019644	ATPsynB	0.0235106	0.960448
FBgn0019650	toy	0.11643	0.591989
FBgn0019660	lncRNA:roX2	0.177353	0.705017
FBgn0019661	lncRNA:roX1	0.280502	0.53491
FBgn0019662	qm	-0.0838352	0.556084
FBgn0019686	lok	-0.15594	0.671864
FBgn0019809	gcm2	-0.00711389	0.993605
FBgn0019828	dj	1.57297	0.285715
FBgn0019830	colt	-0.281404	0.623987
FBgn0019890	Smg5	-0.0418504	0.781602
FBgn0019925	Surf4	-0.196498	0.518072
FBgn0019929	Ser7	-0.440712	0.370537
FBgn0019932	SamDC	0.0399441	0.94221
FBgn0019936	RpS20	-0.0163256	0.98358
FBgn0019938	Polr1A	0.0412821	0.821029
FBgn0019940	Rh6	-0.0697102	0.923004
FBgn0019949	Cdk9	0.12659	0.477365
FBgn0019952	Orct	0.224752	0.568097
FBgn0019957	ND-42	0.0333071	0.936749
FBgn0019960	Mitofilin	-0.125993	0.567829
FBgn0019968	Khc-73	-0.0348237	0.890335
FBgn0019972	Drice	-0.334443	0.0923487
FBgn0019982	Gs1l	-0.173329	0.513644
FBgn0019985	mGluR	0.0803418	0.82047
FBgn0019990	Gcn2	-0.110134	0.65186
FBgn0020018	Ppox	0.0098509	0.975941
FBgn0020224	Cbl	0.161856	0.424063
FBgn0020235	ATPsyngamma	-0.112293	0.760072
FBgn0020236	ATPCL	-0.15758	0.515218
FBgn0020238	14-3-3epsilon	-0.0404923	0.82644
FBgn0020248	stet	0.205634	0.652709
FBgn0020249	stck	-0.333412	0.0477768
FBgn0020251	sfl	0.0139956	0.967881
FBgn0020255	Ran	0.197443	0.0411844
FBgn0020257	Ppa	-0.0907873	0.588932
FBgn0020258	ppk	0.0349444	0.92546
FBgn0020261	pcm	0.00938591	0.977031
FBgn0020269	mspo	0.0989297	0.638414
FBgn0020270	mre11	0.773984	0.10243
FBgn0020272	mst	0.0157477	0.967718
FBgn0020277	lush	-0.805953	0.218429
FBgn0020278	loco	-0.0886496	0.605476
FBgn0020279	lig	-0.226583	0.101634
FBgn0020294	ko	0.0127453	0.95582
FBgn0020299	stumps	-0.082264	0.745977
FBgn0020300	geko	-0.386253	0.393309
FBgn0020304	drongo	-0.156814	0.635517
FBgn0020305	dbe	-0.0264973	0.929803
FBgn0020306	dom	-0.147614	0.483289
FBgn0020307	dve	-0.335337	0.0597992
FBgn0020309	crol	-0.068142	0.757228
FBgn0020312	Tmtc3	0.0815468	0.657982
FBgn0020369	Rpt6	0.0546558	0.883836
FBgn0020370	TppII	0.105984	0.716578
FBgn0020372	TM4SF	0.236454	0.27309
FBgn0020377	Sr-CII	-0.161973	0.904464
FBgn0020378	Sp1	0.100768	0.789607
FBgn0020379	Rfx	0.179555	0.408565
FBgn0020381	Dredd	-0.176568	0.428113
FBgn0020385	pug	-0.252979	0.840451
FBgn0020386	Pdk1	-0.115639	0.681935
FBgn0020388	Gcn5	-0.0168735	0.936252
FBgn0020389	Papss	-0.0902653	0.594459
FBgn0020391	Nrk	-0.0754384	0.793284
FBgn0020392	Nmt	0.0407328	0.875489
FBgn0020399	Mst89B	0.0601236	0.97491
FBgn0020407	asun	0.068605	0.738114
FBgn0020412	JIL-1	0.185148	0.257843
FBgn0020414	Idgf3	0.0199226	0.960768
FBgn0020415	Idgf2	0.0789279	0.931037
FBgn0020416	Idgf1	0.107548	0.913986
FBgn0020429	GluRIIB	-0.475765	0.688687
FBgn0020440	Fak	0.111579	0.587772
FBgn0020443	eRF3	-0.185239	0.494602
FBgn0020445	E23	-0.0181673	0.967718
FBgn0020493	Dad	-0.0669095	0.78964
FBgn0020496	CtBP	0.224257	0.265741
FBgn0020497	emb	0.0568213	0.813499
FBgn0020503	CLIP-190	-0.239826	0.355969
FBgn0020506	Amyrel	-1.41281	0.396124
FBgn0020508	Ag5r2	2.04896	0.0761961
FBgn0020510	Abi	-0.132969	0.319065
FBgn0020513	Paics	-0.263908	0.778465
FBgn0020521	pio	-0.499217	0.0806821
FBgn0020545	kraken	-0.0762027	0.781991
FBgn0020616	SA	0.0872735	0.612568
FBgn0020617	Rx	0.212821	0.605331
FBgn0020618	Rack1	-0.141055	0.691672
FBgn0020620	RN-tre	-0.0420748	0.791103
FBgn0020621	Pkn	-0.287735	0.256724
FBgn0020622	Pi3K21B	0.0453763	0.876462
FBgn0020626	Osbp	-0.12656	0.221648
FBgn0020633	Mcm7	-1.10958	0.196404
FBgn0020637	Lcp65Ag2	-0.876597	0.391678
FBgn0020641	Lcp65Ad	0.975482	0.656934
FBgn0020642	Lcp65Ac	-0.180669	0.866146
FBgn0020647	KrT95D	0.285028	0.0600785
FBgn0020653	Trxr-1	-0.19455	0.180711
FBgn0020655	ArfGAP1	-0.121381	0.178229
FBgn0020660	eIF4B	0.00720633	0.98129
FBgn0020762	Atet	-0.145646	0.522492
FBgn0020764	Alas	-0.112827	0.608122
FBgn0020765	Acp65Aa	0.327397	0.728307
FBgn0020767	Spred	0.212022	0.307726
FBgn0020887	Su(z)12	-0.0881009	0.667371
FBgn0020907	Scp2	-0.037308	0.917364
FBgn0020908	Scp1	0.700856	0.501413
FBgn0020909	Rtc1	0.0734593	0.666532
FBgn0020910	RpL3	-0.120105	0.715476
FBgn0020912	Ptx1	0.237074	0.567447
FBgn0020930	Dgkepsilon	-0.141843	0.64075
FBgn0021738	Crg-1	0.0127017	0.978765
FBgn0030375	CG11356	3.65497	0.000406805	Short SD Up
FBgn0021750	SerRS-m	-0.0683168	0.722898
FBgn0021760	chb	0.102981	0.596962
FBgn0021761	Nup154	0.0736075	0.772012
FBgn0021764	sdk	-0.297084	0.181019
FBgn0021765	scu	-0.637984	0.132993
FBgn0021768	nudC	0.238501	0.314632
FBgn0021776	mira	0.821008	0.0493348
FBgn0021795	Tapdelta	-0.160017	0.608457
FBgn0021796	Tor	0.0533177	0.808594
FBgn0021800	Reph	-0.0517343	0.891385
FBgn0021814	Vps28	0.00661756	0.98518
FBgn0021825	DCTN2-p50	-0.0765661	0.641575
FBgn0021847	Ttc7	0.25181	0.212178
FBgn0021856	l(2)k14505	0.185269	0.327589
FBgn0021872	Xbp1	-0.164233	0.491663
FBgn0021874	Nle	0.0477205	0.907071
FBgn0021875	Zfrp8	0.237245	0.25871
FBgn0021895	ytr	0.0754237	0.738201
FBgn0021906	RFeSP	-0.000217708	0.999715
FBgn0021944	Coprox	0.000811741	0.997302
FBgn0021967	ND-PDSW	0.17377	0.593386
FBgn0021979	l(2)k09913	-0.0709146	0.730482
FBgn0021995	Rs1	0.555602	0.0933618
FBgn0022023	eIF3h	-0.130418	0.565723
FBgn0022027	Vps25	0.060579	0.902359
FBgn0022029	l(2)k01209	-0.152676	0.108306
FBgn0022069	Nnp-1	0.0554691	0.794429
FBgn0022097	Vha36-1	0.0515031	0.880478
FBgn0022153	l(2)k05819	0.0102387	0.974759
FBgn0022160	Gpo1	-0.124209	0.576589
FBgn0022213	Cse1	-0.044747	0.877413
FBgn0022224	ubl	0.187587	0.552276
FBgn0022238	lolal	0.165749	0.455793
FBgn0022288	l(2)09851	-0.276036	0.215363
FBgn0022338	dnk	-0.0297398	0.910417
FBgn0022343	CG3760	0.0213659	0.906185
FBgn0022344	CG10340	-0.0311928	0.909638
FBgn0022349	CG1910	-0.184672	0.284647
FBgn0022355	Tsf1	-0.244144	0.697754
FBgn0022359	Sodh-2	-0.779259	0.306874
FBgn0022361	Pur-alpha	-0.00694594	0.987806
FBgn0022382	Pka-R2	0.00673981	0.987215
FBgn0022699	D19B	0.0433683	0.858308
FBgn0022702	Cht2	-0.405733	0.671864
FBgn0022709	Ak1	0.13957	0.533553
FBgn0022710	Ac13E	-0.25927	0.424919
FBgn0022724	Taf8	0.0467499	0.899654
FBgn0022740	HLH54F	-0.110519	0.95789
FBgn0022764	Sin3A	-0.0115742	0.970424
FBgn0022768	Pp2C1	-0.0859448	0.668559
FBgn0022770	Peritrophin-A	-0.775539	0.277418
FBgn0022774	Oat	-0.348274	0.59204
FBgn0022786	Hira	-0.054485	0.801852
FBgn0022787	Hel89B	-0.0178492	0.888905
FBgn0022800	Cad96Ca	-0.274744	0.499111
FBgn0022893	Df31	-0.152893	0.392777
FBgn0022935	D19A	-0.0193693	0.948412
FBgn0022936	CycH	0.173812	0.597895
FBgn0022942	Cbp80	0.200078	0.149075
FBgn0022943	Cbp20	0.170799	0.59171
FBgn0022959	yps	-0.159616	0.624013
FBgn0022960	vimar	0.0859995	0.626185
FBgn0022984	qkr58E-3	0.0280739	0.890753
FBgn0022985	qkr58E-2	-0.206986	0.116755
FBgn0022986	qkr58E-1	0.252992	0.481877
FBgn0022987	qkr54B	-0.096861	0.679541
FBgn0023000	mth	-0.228786	0.59204
FBgn0023001	melt	-0.287299	0.466655
FBgn0023023	CRMP	0.0218291	0.935154
FBgn0023076	Clk	-0.415614	0.0489367
FBgn0023081	gek	-0.0467135	0.802697
FBgn0023083	fray	-0.267055	0.263715
FBgn0023090	dtr	-1.26621	0.144967
FBgn0023091	dimm	-0.00335622	0.997085
FBgn0023094	cyc	0.0719289	0.524293
FBgn0023095	caps	-0.0688045	0.745841
FBgn0023096	btv	-0.316941	0.613762
FBgn0023097	bon	0.0991444	0.638378
FBgn0023129	aay	-0.14912	0.815841
FBgn0023130	a6	-0.130173	0.625392
FBgn0023143	Uba1	-0.0663113	0.73867
FBgn0023167	SmD3	-0.0177317	0.947756
FBgn0023169	AMPKalpha	-0.142995	0.495128
FBgn0023170	RpL39	0.227459	0.715476
FBgn0023171	rnh1	0.289764	0.250086
FBgn0023172	RhoGEF2	0.0353471	0.903953
FBgn0023174	Prosbeta2	0.0795635	0.772595
FBgn0023175	Prosalpha7	0.120861	0.663924
FBgn0023177	Pp4-19C	0.0704595	0.688687
FBgn0023178	Pdf	0.562005	0.114795
FBgn0023179	amon	0.0152818	0.964395
FBgn0023180	Orc6	0.0805932	0.914996
FBgn0023181	Orc4	-0.00699243	0.984587
FBgn0023212	EloB	-0.179504	0.330001
FBgn0023213	eIF4G1	-0.0109931	0.972091
FBgn0023214	edl	0.131259	0.714631
FBgn0023215	Mnt	0.186455	0.568097
FBgn0023216	Parg	0.064021	0.81704
FBgn0023388	Dap160	-0.31818	0.143419
FBgn0035823	eIF4E5	3.65264	0.0155527	Short SD Up
FBgn0023407	B4	0.115853	0.681053
FBgn0023416	Ac3	0.00449956	0.989656
FBgn0023441	fus	-0.476037	0.381137
FBgn0023458	Rbcn-3A	-0.0780792	0.756634
FBgn0023477	Taldo	-0.377571	0.598557
FBgn0023479	teq	-0.528803	0.488909
FBgn0023489	Pph13	-0.348192	0.124942
FBgn0023495	Lip3	-0.103311	0.917672
FBgn0023496	Lip1	1.19204	0.258417
FBgn0023506	Es2	0.0799071	0.698055
FBgn0023507	D2hgdh	-0.399911	0.488997
FBgn0023508	Ocrl	-0.00261275	0.989734
FBgn0023509	mip130	-0.043721	0.814591
FBgn0023510	Rbcn-3B	-0.157666	0.374422
FBgn0023511	Edem1	0.237043	0.388096
FBgn0023512	eIF2Bepsilon	0.00492655	0.980595
FBgn0023513	CG14803	-0.00945967	0.987215
FBgn0023514	CG14805	-0.210298	0.0280434
FBgn0023515	Gcna	0.178563	0.681053
FBgn0023516	Pex5	-0.327258	0.207773
FBgn0023517	Pgam5	-0.07832	0.698055
FBgn0023518	trr	0.0830624	0.707492
FBgn0023519	mRpL16	0.272945	0.213548
FBgn0023520	CG3857	-0.142906	0.629808
FBgn0023521	CG3587	0.149147	0.526119
FBgn0023522	CG11596	-0.0040276	0.987335
FBgn0023523	Or2a	0.346027	0.558809
FBgn0023524	CG3078	0.204284	0.451377
FBgn0023525	CG3191	0.182061	0.352437
FBgn0023526	CG2865	0.856944	0.0020235
FBgn0023527	CG3071	0.0794321	0.722898
FBgn0023528	CG2924	-0.0589988	0.627424
FBgn0023529	CG2918	-0.0395023	0.784536
FBgn0023530	CG3740	-0.378618	0.239984
FBgn0023531	CG32809	0.171695	0.652709
FBgn0023534	CG17778	0.309776	0.201355
FBgn0023535	arg	0.110729	0.910523
FBgn0023536	CG3156	0.10167	0.514294
FBgn0023537	CG17896	-0.263539	0.392486
FBgn0023540	CG3630	0.0808068	0.832109
FBgn0023541	Cyp4d14	0.906286	0.0190913
FBgn0023542	Nmd3	-0.18045	0.211384
FBgn0023545	PIG-K	0.130518	0.425107
FBgn0023549	Mct1	0.104775	0.880778
FBgn0023550	FarO	0.797112	0.449812
FBgn0024150	Ac78C	0.249804	0.256724
FBgn0024179	wit	-0.0746271	0.598557
FBgn0024183	vig	-0.148851	0.186767
FBgn0024184	unc-4	0.0442641	0.915982
FBgn0024187	syd	-0.122841	0.562823
FBgn0024188	san	0.0796016	0.565589
FBgn0024189	sns	0.0629008	0.794043
FBgn0024191	sip1	0.41762	0.0777728
FBgn0024194	rasp	0.0231329	0.973198
FBgn0024196	robl	0.00967667	0.990845
FBgn0024222	IKKbeta	-0.341685	0.319065
FBgn0024227	aurB	-0.174372	0.882856
FBgn0024230	Hs2st	0.284647	0.0283975
FBgn0024232	gprs	-0.0250032	0.941598
FBgn0024234	gbb	-0.0985898	0.742175
FBgn0024236	foi	-0.100663	0.668896
FBgn0024238	Fim	0.0450449	0.697754
FBgn0024244	drm	-0.49896	0.00676993
FBgn0024245	dnt	0.1273	0.597441
FBgn0024248	chico	0.0963494	0.488762
FBgn0024250	brk	-0.565052	0.0242449
FBgn0024251	bbx	0.756586	0.247466
FBgn0024273	WASp	-0.0656761	0.745959
FBgn0024277	trio	0.0682699	0.774972
FBgn0024285	Srp54	-0.19828	0.340749
FBgn0024288	Sox100B	-0.483311	0.451572
FBgn0024289	Sodh-1	-0.684221	0.587025
FBgn0024291	Sirt1	-0.0908284	0.59876
FBgn0024293	Spn43Ab	0.016405	0.987335
FBgn0024294	Spn43Aa	-0.0330544	0.969618
FBgn0024314	Plap	0.0134274	0.964536
FBgn0024315	Picot	-0.287406	0.0254923
FBgn0024319	Nach	0.520312	NA
FBgn0024320	Npc1a	0.135752	0.518022
FBgn0024321	NK7.1	0.0734894	0.821029
FBgn0024326	Mkk4	0.0865609	0.668531
FBgn0024329	Mekk1	-0.225183	0.151014
FBgn0024330	MED6	-0.0362804	0.861792
FBgn0024352	Stip1	0.0264142	0.902169
FBgn0024360	MTPAP	0.0843749	0.666532
FBgn0024361	Tsp2A	-0.341004	0.727443
FBgn0024362	Naa30A	-0.117352	0.612568
FBgn0024364	CG11417	0.0319083	0.935677
FBgn0024365	CG12773	-0.105419	0.55984
FBgn0024366	CG11409	-0.832743	0.0436144
FBgn0024371	E2f2	0.203473	0.505883
FBgn0024432	Dlc90F	-0.0710579	0.711776
FBgn0024491	Bin1	0.304301	0.113768
FBgn0024509	Sec13	-0.065316	0.654531
FBgn0024510	dlt	0.100844	0.680113
FBgn0024542	Neos	0.0624151	0.789154
FBgn0024555	flfl	0.013464	0.958797
FBgn0024556	mEFTu1	0.0444429	0.807257
FBgn0024558	Dph5	0.101906	0.728941
FBgn0024689	fws	0.0584937	0.726134
FBgn0024698	Cpsf160	0.252824	0.224687
FBgn0024728	Slip1	0.0251549	0.932689
FBgn0024732	Drep1	0.137966	0.647062
FBgn0024733	RpL10	-0.0301487	0.95789
FBgn0024734	PRL-1	0.102695	0.856808
FBgn0024740	Lip2	0.149564	0.937716
FBgn0024754	Flo1	0.00622634	0.982832
FBgn0024804	Dbp80	0.240555	0.346201
FBgn0024806	DIP2	0.126023	0.552231
FBgn0024807	DIP1	0.155837	0.623987
FBgn0024811	Crk	0.259198	0.171779
FBgn0024814	Clc	-0.0723208	0.600499
FBgn0024833	AP-1mu	-0.021371	0.891273
FBgn0024836	stan	0.117965	0.681935
FBgn0024841	Pcd	-0.198004	0.27309
FBgn0024846	p38b	-0.114993	0.508717
FBgn0024887	kin17	0.16493	0.311387
FBgn0024889	Kap-alpha1	-0.143326	0.297403
FBgn0024897	b6	-0.847844	0.190132
FBgn0024909	Taf7	0.10469	0.651926
FBgn0024912	agt	-0.235627	0.429377
FBgn0024913	Actbeta	0.0881725	0.725403
FBgn0024920	Ts	-0.525325	0.59876
FBgn0024921	Tnpo	0.144118	0.512156
FBgn0024941	RSG7	0.452199	0.0896084
FBgn0024943	PIP82	-0.564888	0.113099
FBgn0024944	Oamb	0.0366242	0.884091
FBgn0024945	NitFhit	-0.163576	0.558563
FBgn0024947	NTPase	-0.206528	0.116275
FBgn0024956	Mat1	0.0873096	0.804881
FBgn0024957	Irp-1B	-0.208686	0.630501
FBgn0024958	Irp-1A	-0.00393298	0.989656
FBgn0024963	GluClalpha	0.33197	0.266335
FBgn0024973	CG2701	-0.0294301	0.900561
FBgn0024975	CG2712	0.0620759	0.837014
FBgn0024980	Syx4	-0.00956835	0.983406
FBgn0024983	CG4293	0.0552233	0.742339
FBgn0024985	Rilpl	0.124168	0.545934
FBgn0024986	CG3719	-0.0129241	0.973664
FBgn0024987	ssx	-0.140021	0.545792
FBgn0024989	CG3777	-0.659752	0.412977
FBgn0024991	CG2694	-0.0159478	0.969489
FBgn0024992	Spg7	-0.120231	0.54321
FBgn0024993	CG2662	0.212594	0.504619
FBgn0024994	Ugalt	-0.0765093	0.722424
FBgn0024995	CG2680	0.202581	0.397378
FBgn0024996	eIF2Bbeta	-0.0917007	0.60565
FBgn0024997	CG2681	-0.405754	0.0619294
FBgn0024998	CG2685	0.150612	0.499154
FBgn0025109	Bem46	-0.132408	0.595457
FBgn0025111	Ant2	-0.974116	0.00218178
FBgn0025185	az2	0.108537	0.619018
FBgn0025186	ari-2	0.0775404	0.575429
FBgn0025334	PHDP	0.392479	0.398073
FBgn0025335	Cpes	-0.107602	0.659962
FBgn0025336	CG4882	0.194333	0.452623
FBgn0025352	Mtpbeta	-0.314797	0.492098
FBgn0025360	Optix	0.693777	1.64917e-12
FBgn0025366	Ip259	-0.0835887	0.774647
FBgn0025373	Fpps	-0.165504	0.45033
FBgn0025381	rush	-0.102777	0.620021
FBgn0025382	Rab27	0.372062	0.330896
FBgn0025383	CG14780	0.387768	0.658933
FBgn0025387	Alms1b	0.0146866	0.994448
FBgn0025388	Alms1a	0.165667	0.625398
FBgn0025390	Mur2B	-0.204846	0.445316
FBgn0025391	Scgdelta	0.0628532	0.713601
FBgn0025393	CG14795	0.900804	0.0563398
FBgn0025394	inc	-0.0247997	0.909687
FBgn0025454	Cyp6g1	-0.726724	0.406512
FBgn0025455	CycT	-0.0487712	0.883836
FBgn0025456	CREG	-0.25381	0.624048
FBgn0025457	Bub3	0.140579	0.375068
FBgn0025463	Bap60	0.0205724	0.917364
FBgn0025469	slv	0.11694	0.647863
FBgn0025519	fidipidine	0.216502	0.418955
FBgn0025525	bab2	0.0247224	0.931917
FBgn0025549	unc-119	0.149457	0.364293
FBgn0025558	CG4101	0.230326	0.432453
FBgn0025571	SF1	0.16735	0.659085
FBgn0025574	Pli	-0.103578	0.694836
FBgn0025582	eIF3e	-0.0947886	0.75405
FBgn0038789	Ir92a	3.60527	0.0315115	Short SD Up
FBgn0025592	Gk1	-0.202132	0.523665
FBgn0025595	AkhR	-0.109602	0.930512
FBgn0025608	Faf2	-0.156998	0.314546
FBgn0025613	CG3081	1.39427	0.06189
FBgn0025615	Torsin	0.104029	0.74845
FBgn0025620	CG13360	0.118047	0.942836
FBgn0025621	CG16989	0.463671	0.0887958
FBgn0025624	CG4025	0.0351731	0.913986
FBgn0025625	Sik2	-0.0161001	0.961354
FBgn0025626	CG4281	0.100641	0.541702
FBgn0025627	CG4194	-0.196954	0.894721
FBgn0025628	CG4199	-0.2031	0.613762
FBgn0025629	CG4045	0.0437254	0.841566
FBgn0025630	Rtca	-0.167517	0.683157
FBgn0025631	moody	-0.282083	0.451252
FBgn0025632	CG4313	0.154989	0.531459
FBgn0025633	spdi	-0.0539653	0.834549
FBgn0025634	CG13367	0.0940368	0.729876
FBgn0025635	Hinfp	0.11843	0.494697
FBgn0025637	SkpA	0.0724297	0.68257
FBgn0025638	Roc1a	-0.00270106	0.991118
FBgn0025639	Hmt4-20	-0.0444295	0.845813
FBgn0025640	CG13369	-0.118708	0.626099
FBgn0025641	DAAM	0.00571362	0.983392
FBgn0025642	CG32812	0.692301	0.0985637
FBgn0025643	CG3588	-0.480903	0.20834
FBgn0025644	CG14424	0.243305	0.90987
FBgn0025645	CG3598	-0.0123202	0.995925
FBgn0025674	CycK	-0.0476854	0.625155
FBgn0035665	Jon65Aiii	3.55542	0.00820606	Short SD Up
FBgn0025678	CaBP1	-0.129724	0.413312
FBgn0025680	cry	-0.448703	0.146664
FBgn0025681	CG3558	-0.198912	0.111482
FBgn0025682	scf	-0.0528807	0.813018
FBgn0025684	MFS18	0.0504199	0.715476
FBgn0025686	Amnionless	0.438043	0.372304
FBgn0025692	Lfg	-0.435773	0.366828
FBgn0025693	ZnT41F	0.0448219	0.949758
FBgn0025697	santa-maria	-0.300439	0.464352
FBgn0025700	CG5885	-0.26217	0.450144
FBgn0025702	Srpk79D	0.105933	0.564322
FBgn0025709	CNT2	-0.497717	0.154052
FBgn0025712	CG13920	0.0168772	0.941067
FBgn0025716	Bap55	0.0131672	0.969618
FBgn0025720	Ate1	-0.0789669	0.743667
FBgn0025724	beta'COP	-0.173085	0.400478
FBgn0025725	alphaCOP	-0.127833	0.525999
FBgn0025726	unc-13	0.206857	0.470337
FBgn0025739	pon	0.0247027	0.980295
FBgn0025740	PlexB	0.00108261	0.997984
FBgn0025741	PlexA	0.158959	0.625398
FBgn0025742	mtm	-0.0815976	0.606379
FBgn0025743	mbt	0.0969975	0.579912
FBgn0025776	ind	-0.57949	0.752953
FBgn0025777	homer	-0.0751645	0.859579
FBgn0025781	Cdc16	-0.0814944	0.809387
FBgn0025790	TBPH	-0.0106299	0.967881
FBgn0025800	Smox	0.339021	0.0073007
FBgn0025802	Sbf	0.0743748	0.747773
FBgn0025807	Rad9	-0.128439	0.739451
FBgn0025808	Rad17	0.76575	0.000558659
FBgn0025809	Paf-AHalpha	-0.0164852	0.949516
FBgn0025814	Mgstl	-0.110034	0.866704
FBgn0025815	Mcm6	0.342681	0.21736
FBgn0025820	JTBR	-0.152304	0.494697
FBgn0025827	CG6421	-0.474888	0.134131
FBgn0025830	IntS8	0.0315639	0.872404
FBgn0025832	Fen1	-0.334152	0.344319
FBgn0025833	CG8910	0.0926421	0.681927
FBgn0025835	CG17707	-0.319067	0.83028
[truncated: 10,319 more rows]

## Sheet: ShortSD_VS_LongSD DEG
FlyBaseID	GeneName	log2FoldChange	padj	Remark	Avg. Norm. Expression	73Grp_1	73Grp_2	73Iso_1	73Iso_2	370Grp_1	370Grp_2	370Iso_1	370Iso_2	563Grp_1	563Grp_2	563Iso_1	563Iso_2	360Grp_1	360Grp_2	360Iso_1	360Iso_2	317Grp_1	317Grp_2	317Iso_1	317Iso_2	707Grp_1	707Grp_2	707Iso_1	707Iso_2
FBgn0036655	CG13031	7.53494	7.78515e-06	Short SD Up	83.7621	46.6053	46.7656	119.177	122.441	32.5969	31.1179	77.114	75.9976	61.6533	61.6734	102.647	92.3153	58.5003	44.5568	130.336	107.895	50.6613	41.0757	125.497	147.693	68.5183	75.8139	146.52	143.12
FBgn0038394	CG10264	7.36755	0.000131511	Short SD Up	2.6961	0.110965	0.191075	0	0	0.0252885	0	0	0	18.184	33.5441	8.21659	4.03813	0	0	0	0.0275875	0.146279	0.0853965	0	0	0.0268278	0.0792618	0.0308724	0
FBgn0030377	CG1924	7.17884	4.53472e-05	Short SD Up	1.03622	0	0.0477688	0.193658	0.464752	0.0252885	0.139542	0	0	5.66456	7.11263	6.16244	4.89389	0	0	0	0	0	0.0853965	0	0	0.0268278	0	0	0.0524824
FBgn0083141	Spn28B	6.43313	4.12168e-05	Short SD Up	1.8428	9.32105	10.939	13.13	9.46405	0.050577	0	0.0487138	0	0.49257	0	0.0604161	0.21394	0.119571	0.0933126	0	0.055175	0.0975193	0	0	0.0875477	0.0536556	0	0	0
FBgn0036363	CG10140	6.39045	0.000143032	Short SD Up	2.98008	20.6395	21.7348	10.5737	17.4493	0	0	0.0243569	0.0313005	0	0.183552	0.0604161	0	0	0	0	0	0.0487597	0.142328	0.0957263	0.0875477	0.107311	0.198155	0.0926171	0.0524824
FBgn0034221	CG10764	6.35303	1.88026e-09	Short SD Up	9.72243	47.9091	50.3483	67.393	62.4036	0.278173	0.558168	0.243569	0.0939014	0.533618	0.22944	0.392705	0.187198	0.179357	0.186625	0.205577	0.11035	0.0975193	0.370052	0.350996	0.218869	0.268278	0.0792618	0.123489	0.577306
FBgn0267589	asRNA:CR45927	6.27129	0.000171691	Short SD Up	0.526229	5.24309	3.39158	1.70419	1.73226	0.0252885	0	0.0974277	0.0939014	0	0.0917758	0	0.0802277	0	0	0	0	0.0975193	0.0284655	0	0.0437739	0	0	0	0
FBgn0003114	plu	6.03827	1.88026e-09	Short SD Up	0.304835	0.166447	0.191075	0.116195	0.0845004	0.0252885	2.27919	0.657637	1.40852	0.574665	0.367103	0.876034	0.508109	0	0	0.0293681	0	0	0	0.0319088	0	0	0	0	0
FBgn0043577	PGRP-SB2	5.71769	0.000153628	Short SD Up	3.02782	1.30384	1.86298	4.5316	5.32353	1.28971	2.09313	1.4127	1.43982	0.82095	1.56019	4.16871	4.97412	1.674	3.40591	5.08068	7.22793	1.46279	1.93565	3.54187	4.55248	0.590212	0.634095	7.68722	4.09363
FBgn0030641	CG6299	5.6259	2.53175e-05	Short SD Up	0.388382	1.94189	2.24513	2.13024	1.81676	0.101154	0	0.121785	0	0.16419	0.458879	0.0302081	0.133713	0.0896785	0	0	0	0	0	0	0.0875477	0	0	0	0
FBgn0031034	CG14205	5.59568	1.88255e-06	Short SD Up	1.30815	0.0277412	0.0477688	0	0	2.4277	1.81405	1.60756	0.594709	5.91084	4.63468	6.7666	6.92632	0.269036	0	0.0293681	0.0827625	0.0487597	0.0284655	0.0957263	0.0437739	0	0.0396309	0	0
FBgn0034082	CG10734	4.81036	3.91551e-05	Short SD Up	1.96391	0.166447	0.38215	0	0.0422502	0.252885	0	0.267926	0.438207	11.3291	8.67282	10.3009	13.612	0.119571	0.139969	0.0293681	0.0827625	0.195039	0.0284655	0.25527	0	0.37559	0.118893	0.0617447	0.262412
FBgn0267099	lncRNA:CR45539	4.7432	9.52616e-07	Short SD Up	0.0490393	0	0	0.116195	0.126751	0.0252885	0	0.0974277	0.0313005	0	0	0.0302081	0.0534851	0	0.0933126	0.0293681	0	0.0487597	0	0.0957263	0	0	0	0.0617447	0.367377
FBgn0002563	Lsp1beta	4.62189	4.68661e-05	Short SD Up	0.907475	0.610307	0.191075	0.0774632	0.126751	0.101154	0.744224	0.0730708	0.0939014	2.58599	3.76281	5.98119	6.60541	0.0298928	0	0.0293681	0	0.146279	0.313121	0.0957263	0.0437739	0.0536556	0	0.0617447	0.0524824
FBgn0039342	CG5107	4.55977	1.09032e-07	Short SD Up	4.963	20.3066	19.2508	34.9359	33.7157	1.66904	1.11634	1.02299	0.62601	0.16419	0.504767	0.362497	0.561594	0.508178	0.933126	0.293681	0.165525	0.487597	0.227724	0.382905	0.306417	0.402417	0.396309	0.246979	0.524824
FBgn0031644	CG15625	4.52599	4.84637e-07	Short SD Up	5.49752	42.9712	36.8297	23.7812	16.3931	0.278173	2.69781	0.487138	1.43982	0.697808	0.550655	0.453121	0.160455	0.119571	0.466563	0.0881043	0.275875	0.390077	0.654707	0.478631	0.525286	0.321934	0.277416	0.710064	0.892201
FBgn0033042	Tsp42A	4.45589	0.00527865	Short SD Up	0.232985	0	0.0955375	0	0.0422502	0.050577	0	0.0487138	0	1.43666	1.78963	1.08749	0.802277	0.0896785	0	0.0293681	0	0	0	0.0319088	0.0875477	0	0	0	0
FBgn0029606	CG14052	4.43246	0.000214275	Short SD Up	1.95516	0.138706	0.716531	0.0387316	0.0422502	0.050577	0	0.0487138	0.0313005	23.6434	6.24076	4.07809	9.81452	0.20925	0.606532	0.0881043	0.0827625	0.0975193	0.25619	0.0319088	0.262643	0.107311	0.118893	0.0617447	0.157447
FBgn0004400	rhi	4.3279	9.54988e-06	Short SD Up	1.05255	0.0277412	0.191075	0.116195	0.0845004	2.30125	1.76753	8.0865	10.2979	0.123143	0.0917758	0.453121	0.561594	0.149464	0.233281	0.117472	0.11035	0	0.056931	0.191453	0	0.0268278	0.118893	0.154362	0
FBgn0032754	CG10700	4.31703	1.37692e-05	Short SD Up	0.34924	0.859978	0.573225	0.7359	0.971755	0.50577	1.6745	0.706351	1.65893	0	0.137664	0.0302081	0.10697	0.0298928	0	0	0	0	0	0	0	0.0268278	0.0396309	0.0617447	0.262412
FBgn0036414	nan	4.30917	0.000139268	Short SD Up	1.12574	5.88114	4.68134	5.57735	8.6613	0.050577	0.46514	0.0974277	0	0.123143	0.137664	0.0302081	0	0.149464	0.186625	0.0587362	0.055175	0.195039	0.113862	0.0957263	0.175095	0.0804835	0.118893	0.0308724	0.0524824
FBgn0038450	CG17560	4.29962	0.00157182	Short SD Up	1.11695	0.0554825	0	0	0	2.52885	4.41883	4.35989	6.354	4.35104	3.34982	0.120832	0	0.0597857	0	0	0.0275875	0.146279	0.199259	0.191453	0.0875477	0.134139	0.317047	0	0.104965
FBgn0034296	CG10912	4.26088	0.00705233	Short SD Up	0.160469	0.0832237	0	0	0.633753	0	0	0.121785	0.187803	1.51876	1.05542	0.0604161	0	0	0	0.0293681	0.0275875	0.0487597	0	0.0319088	0	0	0	0	0.0524824
FBgn0037590	Or85b	4.24338	3.26332e-05	Short SD Up	0.663271	0.194189	0.286613	0.154926	0.211251	5.15885	1.34891	3.82404	3.69346	0.246285	0	0	0.0802277	0	0	0.176209	0.0827625	0.0487597	0.113862	0.0638175	0	0.0804835	0.0396309	0.0617447	0.0524824
FBgn0003863	alphaTry	4.01945	0.00922738	Short SD Up	0.883684	0.0554825	0.0477688	0.0774632	4.35177	0.126442	0	0.121785	0	4.51523	11.2425	0.0906242	0.0267426	0	0	0.0881043	0.055175	0	0	0.159544	0.218869	0	0	0.0308724	0
FBgn0250815	Jon65Aiv	4.01655	0.0020235	Short SD Up	0.350885	0.388377	0.191075	0.0774632	0.338002	0.379327	1.30239	0.146142	0	1.02619	3.85458	0.241664	0	0	0	0	0	0	0	0.191453	0.0437739	0	0	0.0308724	0.20993
FBgn0036311	CG17666	3.93201	0.000420778	Short SD Up	0.855688	0.166447	0.238844	0.116195	0.0845004	0.126442	0	0.121785	0	6.60865	2.98271	3.98746	4.81366	0.0896785	0.139969	0.117472	0	0.0975193	0.0284655	0.127635	0.525286	0.0536556	0.0792618	0.0308724	0
FBgn0039343	CG5111	3.91084	0.000297946	Short SD Up	0.188889	0.970943	0.7643	0.193658	0.380252	0.531058	0.139542	0.438425	0.62601	0.082095	0.0917758	0	0.0534851	0	0	0	0	0.0487597	0.0853965	0.127635	0	0	0	0	0
FBgn0052762	CG32762	3.7979	0.00085223	Short SD Up	1.44139	10.5971	9.21937	5.53862	5.19678	0.050577	0	0.121785	0.156502	0.615713	0.412991	0.332289	0.0534851	0.179357	0.233281	0.0293681	0.055175	0.292558	0.939362	0.159544	0.218869	0.0804835	0.0792618	0.0308724	0
FBgn0038565	CG7794	3.78202	2.98422e-06	Short SD Up	6.14445	1.4148	1.71968	0.774632	0.718254	47.3906	37.8624	21.5802	21.8164	1.14933	1.78963	0.694785	1.01622	1.13593	1.39969	0.61673	0.413813	1.26775	1.48021	0.350996	0.744156	0.24145	0.990773	0.216107	0.682271
FBgn0265689	lncRNA:CR44496	3.7378	0.00289335	Short SD Up	0.213479	0.0832237	0	0	0	1.82077	0.558168	0.462781	0.250404	0.32838	0.458879	0.694785	0.133713	0	0	0	0.0275875	0	0	0	0	0.0536556	0.158524	0.0926171	0
FBgn0267278	asRNA:CR45714	3.701	2.98422e-06	Short SD Up	1.26598	0.194189	0	0.116195	0.169001	5.26001	6.74453	3.09333	5.00808	1.68295	2.2944	2.08436	1.60455	0.298928	0.279938	0.0293681	0.11035	0.341318	0.370052	0.127635	0.262643	0	0	0.154362	0.157447
FBgn0033501	CG12911	3.69287	1.88026e-09	Short SD Up	2.70694	15.8957	13.8529	8.01744	9.2528	0.606924	0.744224	0.389711	0.563409	6.32132	2.89094	0.724993	1.31039	0.298928	0.279938	0.323049	0.303463	0.292558	0.113862	0.414814	0.744156	0.402417	0.237785	0.617447	0.367377
FBgn0021742	C901	3.69158	4.3713e-05	Short SD Up	2.16296	4.99342	1.14645	0.154926	0.211251	5.03241	0.69771	2.41134	1.37722	5.7877	1.8814	2.11456	1.57781	3.10885	2.79938	0.675466	1.04833	6.19248	3.24507	1.14872	1.66341	0.751179	1.78339	0.586575	1.52199
FBgn0030375	CG11356	3.65497	0.000406805	Short SD Up	0.552464	0.166447	0.0955375	0.0774632	0.0845004	0.0252885	0	0.170498	0.281704	1.68295	3.57926	2.29581	3.7707	0.0896785	0.419907	0.0293681	0.0827625	0.0487597	0.113862	0.0319088	0	0.0804835	0.0396309	0.0926171	0
FBgn0035823	eIF4E5	3.65264	0.0155527	Short SD Up	1.01134	9.43202	6.40101	3.48584	2.45051	0	0.651196	0.0487138	0.0313005	0.0410475	0.0458879	0.0302081	0	0.0597857	0	0	0.0827625	0.0487597	0.056931	0.25527	0	0.321934	0.118893	0.185234	0.524824
FBgn0038789	Ir92a	3.60527	0.0315115	Short SD Up	0.166943	1.05417	0.812069	0.7359	0.887255	0	0	0.0487138	0.0313005	0.16419	0	0	0	0.0298928	0	0.117472	0.055175	0	0	0	0	0	0.0396309	0.0308724	0
FBgn0035665	Jon65Aiii	3.55542	0.00820606	Short SD Up	0.274204	0.138706	0.0955375	0.23239	0.422502	0.0252885	0	0.219212	0.281704	0.082095	0.367103	0.634369	0.695306	0.328821	0.0933126	0.411153	0.193113	0.0975193	0.227724	0.414814	0.262643	0.24145	0.356678	0.339596	0.419859
FBgn0039768	CG15533	3.52727	0.0280434	Short SD Up	0.196817	0.388377	0.477688	1.35561	1.98576	0	0	0.0243569	0	0.0410475	0.0458879	0	0.0267426	0.0597857	0	0.0587362	0.0275875	0.0487597	0	0.0957263	0.0875477	0	0	0	0
FBgn0051174	CG31174	3.48109	8.679e-11	Short SD Up	2.21917	1.85866	2.14959	0.929558	0.760504	9.78665	11.8611	7.08786	5.75929	2.46285	1.74374	2.29581	2.35334	0.0298928	0.279938	0.0293681	0.165525	0.243798	0.284655	0.478631	0.393965	0.590212	0.356678	0.308724	1.04965
FBgn0267685	lncRNA:CR46021	3.42857	0.00121431	Short SD Up	0.0771857	0.166447	0.334381	0.116195	0.126751	0.202308	0	0.0730708	0.219103	0.32838	0.0458879	0.0906242	0.0267426	0.0597857	0	0	0	0	0	0.0319088	0	0	0	0.0308724	0
FBgn0038526	CG14327	3.40334	5.30144e-08	Short SD Up	0.633204	0.416118	0.812069	0.890827	1.60551	0.657501	1.58148	1.09606	0.563409	0.369428	0.504767	2.96039	2.46031	0.269036	0	0.381785	0.165525	0	0.056931	0.0319088	0.175095	0.0536556	0	0.0926171	0.0524824
FBgn0266752	lncRNA:CR45225	3.39776	0.00121431	Short SD Up	0.264707	1.35932	1.76744	0.774632	0.507003	0.531058	0	0.243569	0.187803	0	0.367103	0.0604161	0.0267426	0.0298928	0	0.0293681	0	0	0.0853965	0	0.131322	0.107311	0.0396309	0	0.104965
FBgn0035094	CG9380	3.29593	1.89258e-05	Short SD Up	1.46659	0.416118	0.0955375	0.154926	0.295752	5.81635	8.79115	4.87138	9.39014	0.944093	0.87187	0.302081	0.133713	0.328821	0.0466563	0.205577	0.165525	0.487597	0.426983	0.191453	0.306417	0.348762	0.317047	0.185234	0.104965
FBgn0266706	lncRNA:CR45196	3.25296	8.51369e-05	Short SD Up	0.339153	1.13739	1.43306	0.813364	0.591503	0.252885	0	0.146142	0	0.65676	1.1472	0.634369	0.561594	0.0298928	0	0.0587362	0	0.146279	0.056931	0.223361	0.0875477	0.0268278	0	0.0308724	0.104965
FBgn0037147	CG7140	3.21401	0.03082	Short SD Up	0.272333	0.0277412	0	0	0	0.0252885	0	0.0974277	0	0.49257	1.19309	2.11456	1.89872	0	0.186625	0	0.055175	0.0487597	0.113862	0	0.0437739	0.0536556	0.0396309	0.0926171	0.0524824
FBgn0038629	CG14304	3.18359	0.00049257	Short SD Up	10.7504	1.47028	1.76744	1.23941	0.380252	2.30125	1.95359	5.18802	5.44628	28.6922	28.7258	65.3702	88.3574	1.34518	1.21306	1.76209	1.57249	3.55945	0.939362	7.78574	2.80153	1.4487	3.28937	0.771809	0.629789
FBgn0051516	CG31516	3.1664	0.0242449	Short SD Up	0.906976	0	0.143306	0	0.0845004	0.429904	0	0.0974277	0.219103	10.4261	5.82776	2.83956	0.561594	0.0298928	0.186625	0.0293681	0.0275875	0	0.170793	0	0.0875477	0.482901	0	0.123489	0
FBgn0261832	CG42764	3.03038	1.62307e-05	Short SD Up	1.47869	1.13739	1.38529	1.31687	1.05626	12.5684	6.51196	3.62918	3.25525	0.287333	0.275327	0.332289	0.187198	0.0597857	0.559875	0.440522	0.358638	0.195039	0.341586	0.191453	0.306417	0.0268278	0.198155	0.710064	0.157447
FBgn0051683	CG31683	2.99977	0.00364538	Short SD Up	6.88034	3.46765	1.91075	3.64077	1.73226	24.1505	22.5128	12.2759	16.9962	20.0722	19.9154	10.8447	10.4831	0.0298928	0.0466563	0.0881043	0.0275875	0.146279	0.0284655	0.414814	0.306417	3.19251	3.2101	5.804	3.83122
FBgn0264475	lncRNA:CR43883	2.9683	1.52135e-07	Short SD Up	0.640579	0.610307	0.573225	1.04575	0.718254	1.79548	0.976794	3.82404	2.34754	0.287333	0.825982	0.271872	0.401138	0.0896785	0	0.0587362	0.0827625	0.0487597	0.199259	0.350996	0.262643	0.107311	0.0792618	0.154362	0.262412
FBgn0267027	lncRNA:CR45471	2.94053	0.0153866	Short SD Up	0.149836	0.0277412	0.238844	0	0.126751	0.101154	1.95359	0.194855	0.0939014	0.123143	0.275327	0.0604161	0	0.0298928	0	0	0.0275875	0.0487597	0.0284655	0.0638175	0.131322	0	0.0396309	0.0308724	0
FBgn0005670	Cyp4d1	2.94026	0.0216981	Short SD Up	3.88243	0.0554825	0.334381	0.426048	0.0845004	0.632212	0.046514	0.681994	1.56502	23.1097	45.7961	5.37703	4.6532	0.866892	2.89269	1.32156	2.01389	0.877674	0.8255	0.350996	0.437739	0.0268278	0.0396309	0.710064	0.0524824
FBgn0267585	lncRNA:dntRL	2.84821	4.22741e-05	Short SD Up	0.715425	0.527083	1.09868	2.28516	3.12652	0.733366	0	0.681994	1.34592	0.903045	1.42253	1.5104	1.41736	0.0298928	0	0.0587362	0.0275875	0.195039	0.25619	0	0.0875477	0.456073	0.43594	0.308724	0.262412
FBgn0028789	Doc1	2.84148	0.00364538	Short SD Up	1.08359	0.194189	0	0.464779	0.211251	0.657501	0	0.389711	0.375606	7.18331	5.59833	4.01767	3.82419	0.239143	0.139969	0.323049	0.524163	0	0.370052	0.414814	0.0437739	0.134139	0.0792618	0.401341	0.419859
FBgn0031409	CG4271	2.82222	0.0103797	Short SD Up	0.172817	0	0.238844	0.0387316	0	0.404616	1.72102	0.219212	0.313005	0.082095	0.458879	0.15104	0.0534851	0.0298928	0.0466563	0.0587362	0.0275875	0	0.113862	0	0	0.0268278	0.0396309	0.123489	0
FBgn0033997	Ir51a	2.80059	0.0276737	Short SD Up	0.21338	0.0832237	0.286613	0.154926	0.253501	1.18856	0	0.94992	1.37722	0.16419	0	0.0302081	0	0.0896785	0	0.0293681	0	0.146279	0	0.0638175	0	0	0.158524	0.0926171	0.0524824
FBgn0037753	CG12947	2.78232	0.000171054	Short SD Up	21.5627	9.73717	6.63986	5.49989	4.22502	5.76578	6.60499	4.60346	4.19426	116.164	81.864	99.2033	106.596	3.40778	4.75894	4.49332	4.1933	4.58341	3.98517	9.89171	9.23628	4.37294	6.89578	4.81609	5.77306
FBgn0050177	CG30177	2.75877	0.0232878	Short SD Up	0.10188	0.194189	0.0955375	0	0.0422502	0.606924	0.23257	0.0730708	0	0.16419	0.22944	0.362497	0.133713	0.0597857	0.0933126	0	0	0	0.113862	0	0.0437739	0	0	0	0
FBgn0266772	lncRNA:CR45237	2.73775	0.0230088	Short SD Up	0.745697	0.166447	0.0955375	0.0387316	0	7.35895	1.72102	0.901206	2.19103	0.65676	0.780095	0.513537	1.28364	0	0.139969	0	0.055175	0	0.056931	0	0	0.482901	0.673725	0.308724	0.472342
FBgn0285912	mah	2.70136	0.000227371	Short SD Up	3.05123	6.99079	7.02201	10.3026	7.64729	8.85097	10.9773	4.09196	5.25848	1.06724	0.734207	0.181248	0.427881	0.119571	0.186625	0.0587362	0.11035	2.92558	2.61883	0.319088	0.350191	0.536556	0.911511	0.64832	0.892201
FBgn0085771	28SrRNA-Psi:CR40741	2.6787	0.000818492	Short SD Up	0.703179	0.44386	0.525456	0.309853	0.0422502	0.177019	0.186056	0.0730708	0.062601	0.944093	1.46841	1.8729	4.57298	0.0896785	0.139969	0.0587362	0.137938	0.341318	0.113862	0.127635	0.0875477	0.160967	0.198155	0.123489	4.61845
FBgn0085246	CG34217	2.65583	0.00830183	Short SD Up	3.65338	8.65526	3.0572	2.05277	1.81676	0	0.046514	0.219212	0	0.287333	58.966	0.573953	0.989475	0.0597857	0.0466563	0.0881043	0.0275875	0.146279	0.199259	8.77491	0.131322	0.214623	0.673725	0.339596	0.314894
FBgn0033140	CG12836	2.60913	0.000406805	Short SD Up	4.69403	2.27478	1.86298	0.580974	0.549253	22.7596	26.606	13.6155	25.4473	0.574665	0.734207	0.815617	1.60455	1.85336	0.699844	0.734203	0.910388	1.80411	2.4765	0.670084	1.13812	0.965802	1.50597	0.740937	1.73192
FBgn0033873	CG6337	2.60592	0.0212219	Short SD Up	0.109008	0.166447	0.0477688	0.309853	0.211251	0.050577	0.604682	0.0243569	0	0.205238	0.183552	0.0906242	0.374396	0	0	0	0.0275875	0	0	0.0319088	0	0.107311	0.118893	0.0617447	0
FBgn0037889	scpr-A	2.5616	0.0489367	Short SD Up	0.223221	1.35932	1.62414	0.348584	0.169001	0.32875	0	0	0	0.32838	0.321215	0	0.133713	0.0896785	0.186625	0.0587362	0	0	0.0853965	0.0957263	0.0437739	0.0268278	0	0	0.157447
FBgn0032602	ppk17	2.53034	0.0320432	Short SD Up	0.315371	0	0	0.0387316	0.126751	0.278173	0	0.0730708	0.0313005	1.31352	2.01907	0.513537	2.05918	0.0298928	0	0.205577	0.137938	0.195039	0.056931	0.159544	0.0875477	0.0804835	0.0792618	0.0308724	0.0524824
FBgn0052745	CR32745	2.52866	2.53175e-05	Short SD Up	23.976	127.304	131.173	76.4562	86.4439	11.0511	12.0936	6.52765	8.26333	15.1465	6.69964	5.55828	6.57867	5.17146	7.69829	4.34648	4.38641	6.19248	7.40103	4.18005	3.76455	8.45076	9.47179	8.52077	12.5433
FBgn0037410	Osi2	2.46459	0.0140494	Short SD Up	13.6496	8.35011	6.25771	22.3869	22.0969	1.315	2.27919	4.70089	4.06906	16.6242	16.8409	24.4081	22.8649	7.0846	9.00466	23.8469	19.2837	6.77759	8.1696	23.7082	27.4024	7.99469	8.24323	18.3999	15.4823
FBgn0054041	CG34041	2.43479	0.0300355	Short SD Up	0.57612	0.0832237	0	0	0.0422502	3.61625	2.79084	0.803778	1.18942	0.779903	1.42253	0.513537	0.481366	0.149464	0.699844	0.117472	0.137938	0.243798	0.512379	0.159544	0	0	0	0.0308724	0.0524824
FBgn0266952	lncRNA:CR45403	2.40342	0.00527865	Short SD Up	0.419836	1.05417	0.525456	0.464779	0.422502	1.21385	3.53506	0.389711	0.500808	0.0410475	0.0917758	0.0906242	0.160455	0.149464	0.37325	0.0293681	0.055175	0.341318	0.142328	0.0319088	0	0.160967	0.0396309	0	0.262412
FBgn0264567	lncRNA:CR43939	2.39287	0.00113915	Short SD Up	0.173228	0.249671	0.573225	0.116195	0.126751	0.126442	0.837252	0.194855	0.438207	0.0410475	0.137664	0.271872	0.401138	0.0896785	0.0933126	0	0.0275875	0	0	0.127635	0.0437739	0.107311	0.0396309	0.0617447	0.0524824
FBgn0015381	dsf	2.38579	0.00039345	Short SD Up	6.54462	3.1625	2.24513	1.588	1.22526	30.0933	37.2577	27.4259	23.7258	1.97028	1.60608	1.29895	1.20341	3.348	1.77294	1.85019	1.51731	2.14542	2.98888	1.40399	1.66341	1.52919	3.05158	1.26577	1.73192
FBgn0266876	lncRNA:CR45337	2.38433	0.0167231	Short SD Up	0.251186	0.166447	0.0477688	0.0387316	0.126751	1.59318	1.30239	0.657637	0.438207	0.287333	0.0458879	0.0604161	0.320911	0	0.0466563	0.0587362	0	0	0.0284655	0.0957263	0.131322	0.160967	0.158524	0	0.262412
[truncated: 316 more rows]
