# Supplementary material for: Drosulfakinin signaling encodes early-life memory for adaptive social plasticity
Source: bioRxiv preprint, doi:10.1101/2024.04.08.588562, version 1 (2024-04-11)
Supplement: Dataset S3 [file 588562_file10.xlsx]

## Sheet: DGRP73_GrpVSIso
FlyBase ID	GeneSymbol	log2FC	padj	Remark	Avg.norm.exp	73Grp_1	73Grp_2	73Iso_1	73Iso_2
FBgn0041707	7B2	1.02611	9.25955e-06	73Grp_Up	574.875	694.267	919.421	330.86	354.952
FBgn0011294	a5	-2.05541	0.0171892	73Iso_Up	1.89479	0.360601	1.28965	4.49254	1.43637
FBgn0040376	AANATL7	1.017	4.9954e-05	73Grp_Up	18.1642	24.5486	26.4138	10.4568	11.2375
FBgn0023129	aay	-1.00412	0.000468785	73Iso_Up	211.161	142.576	164.931	343.563	193.572
FBgn0029969	Acat1	-1.29263	3.58802e-08	73Iso_Up	52.5396	29.2087	38.2117	71.7644	70.9736
FBgn0010387	Acbp2	-1.48841	6.07901e-06	73Iso_Up	63.312	25.6581	48.0512	83.3443	96.1946
FBgn0033246	ACC	-1.71228	2.66708e-22	73Iso_Up	409.362	240.327	188.623	646.964	561.536
FBgn0012034	AcCoAS	-1.07443	7.90701e-11	73Iso_Up	594.018	459.738	385.843	780.578	749.912
FBgn0016122	Acer	-2.44597	6.88667e-42	73Iso_Up	80.3695	27.4889	28.9931	131.329	133.667
FBgn0033936	Achl	-2.50636	1.55042e-28	73Iso_Up	18.5583	6.26891	6.3527	30.5183	31.0932
FBgn0000028	acj6	1.38423	1.61711e-08	73Grp_Up	41.081	73.7567	50.0096	19.0546	21.5033
FBgn0034629	Acox57D-d	-3.85723	3.05769e-55	73Iso_Up	32.3862	4.38269	5.30187	53.8717	65.9885
FBgn0034628	Acox57D-p	-1.42206	8.70259e-10	73Iso_Up	16.2537	10.2078	9.4574	22.5789	22.7707
FBgn0031703	Acsf2	-1.06573	8.22809e-07	73Iso_Up	27.5431	19.0564	20.2522	35.6305	35.2333
FBgn0263120	Acsl	-1.64202	2.05238e-25	73Iso_Up	365.061	202.269	193.686	536.548	527.739
FBgn0051865	Ada1-1	1.09871	0.0350167	73Grp_Up	2.62882	3.77244	3.72564	1.66534	1.35188
FBgn0051866	Ada1-2	1.4715	0.00485396	73Grp_Up	2.52736	4.13304	3.58235	1.08441	1.30963
FBgn0038172	Adgf-D	-1.76171	2.34896e-13	73Iso_Up	54.2589	28.7371	26.4138	98.6422	63.2425
FBgn0052068	Adi1	-1.46687	1.88463e-11	73Iso_Up	35.9169	19.5002	22.927	53.7555	47.4847
FBgn0038984	AdipoR	-1.76221	3.61969e-29	73Iso_Up	248.444	132.507	120.94	381.827	358.501
FBgn0038467	AdSL	-1.38565	0.000287453	73Iso_Up	35.1462	22.385	20.5388	69.9054	27.7557
FBgn0030421	Agpat1	-1.2049	1.19703e-08	73Iso_Up	50.8787	31.289	36.7788	69.247	66.1998
FBgn0036622	Agpat4	-1.48589	1.72445e-07	73Iso_Up	10.5714	7.04558	5.34964	14.1747	15.7156
FBgn0014031	Agxt	-2.92024	3.1501e-61	73Iso_Up	76.6661	19.9995	20.7776	137.332	128.555
FBgn0014455	Ahcy	-1.45417	1.4248e-11	73Iso_Up	112.226	72.564	60.8044	185.588	129.949
FBgn0025595	AkhR	-2.41718	2.8016e-17	73Iso_Up	43.9214	11.6779	19.5835	71.3384	73.0859
FBgn0000064	Ald1	-1.02902	4.55424e-10	73Iso_Up	1364.42	984.662	993.552	1740.2	1739.28
FBgn0012036	Aldh	-1.61015	2.39439e-15	73Iso_Up	423.915	215.944	250.86	570.746	658.111
FBgn0015568	alpha-Est1	-1.97431	8.44235e-17	73Iso_Up	40.1722	15.6168	20.9687	63.4377	60.6655
FBgn0015569	alpha-Est10	-2.45644	3.31088e-14	73Iso_Up	8.56022	3.7447	2.19717	14.0198	14.2792
FBgn0015570	alpha-Est2	-3.5726	1.58235e-48	73Iso_Up	22.9252	4.21625	3.96446	37.6831	45.8371
FBgn0015571	alpha-Est3	-1.07119	0.000188169	73Iso_Up	10.5303	7.01784	7.97669	14.3684	12.7583
FBgn0261393	alpha-Est5	-2.15348	1.66943e-08	73Iso_Up	5.1868	1.74753	2.57929	8.52033	7.90004
FBgn0015575	alpha-Est7	-2.0349	7.75939e-27	73Iso_Up	132.954	54.3952	62.6672	220.676	194.079
FBgn0015576	alpha-Est8	-1.36327	1.28071e-13	73Iso_Up	54.6551	34.9783	33.0531	74.1656	76.4233
FBgn0003863	alphaTry	-5.67565	0.034893	73Iso_Up	1.13301	0.055477	0.0477646	0.0774575	4.35136
FBgn0039332	alrm	-1.40908	1.70447e-12	73Iso_Up	41.751	25.6027	25.1242	64.0186	52.2585
FBgn0000078	Amy-d	-4.12876	0.00065504	73Iso_Up	8.41133	1.05406	1.00306	26.6454	4.9428
FBgn0000079	Amy-p	-4.3475	0.00329788	73Iso_Up	19.917	2.6629	1.57623	67.2331	8.19576
FBgn0032536	Ance-3	-1.11715	2.3228e-05	73Iso_Up	19.2182	12.1772	14.5682	28.1171	22.0103
FBgn0033366	Ance-4	-3.36615	2.75467e-58	73Iso_Up	36.7826	7.51714	7.35575	73.6621	58.5955
FBgn0035076	Ance-5	-2.56553	3.46527e-29	73Iso_Up	21.0344	6.7682	7.06917	33.4617	36.8387
FBgn0026268	Antdh	-1.8932	9.68462e-10	73Iso_Up	10.7915	4.27173	6.01834	18.0476	14.8284
FBgn0267408	AOX1	-1.03727	2.13043e-09	73Iso_Up	120.518	88.1807	86.0241	153.288	154.579
FBgn0087002	apolpp	-3.30311	5.74157e-55	73Iso_Up	2039.24	385.593	471.676	3305.38	3994.29
FBgn0032136	Apoltp	-1.91111	3.80675e-32	73Iso_Up	178.558	85.7398	82.585	287.91	257.997
FBgn0033926	Arc1	1.64074	3.21612e-10	73Grp_Up	181.058	224.682	341.469	86.5588	71.5228
FBgn0023535	arg	-1.55408	4.34255e-05	73Iso_Up	7.08663	3.77244	4.29882	7.9394	12.3359
FBgn0032076	Argl	-2.64968	3.61915e-31	73Iso_Up	49.2829	14.6737	16.1922	73.1974	93.0683
FBgn0264788	asRNA:CR44018	1.13243	0.000752634	73Grp_Up	9.70483	17.0592	10.8426	5.3833	5.53425
FBgn0264821	asRNA:CR44029	-1.19365	2.28512e-05	73Iso_Up	11.4101	7.01784	8.35881	15.6464	14.6172
FBgn0264874	asRNA:CR44065	-2.39189	2.15935e-12	73Iso_Up	6.31986	2.52421	2.05388	9.2949	11.4065
FBgn0265070	asRNA:CR44181	-2.0529	2.65531e-11	73Iso_Up	8.45827	3.46731	3.96446	12.1221	14.2792
FBgn0266115	asRNA:CR44841	1.00461	0.000270475	73Grp_Up	10.981	16.1161	14.616	6.85499	6.33693
FBgn0266361	asRNA:CR45009	1.16616	4.5183e-06	73Grp_Up	16.4379	22.7178	24.7898	8.90762	9.33641
FBgn0266406	asRNA:CR45046	-5.96792	7.81213e-18	73Iso_Up	4.61745	0.0832156	0.286588	12.8192	5.28077
FBgn0266627	asRNA:CR45134	1.26878	0.0129911	73Grp_Up	2.7204	3.71696	4.29882	1.47169	1.39412
FBgn0266634	asRNA:CR45141	1.50906	1.79403e-05	73Grp_Up	5.96472	9.76396	8.54987	3.13703	2.40803
FBgn0266637	asRNA:CR45144	-5.86813	0.00316746	73Iso_Up	3.29619	0.249647	0	9.21745	3.71766
FBgn0266705	asRNA:CR45195	1.95793	0.000284947	73Grp_Up	2.39994	3.60601	4.25105	0.813304	0.929416
FBgn0267076	asRNA:CR45520	1.17643	8.79648e-05	73Grp_Up	14.0181	19.3615	21.2553	6.58389	8.8717
FBgn0267161	asRNA:CR45601	-2.64634	3.64313e-11	73Iso_Up	15.5885	5.40901	4.44211	15.9175	36.5852
FBgn0267189	asRNA:CR45629	-6.50614	0.00271368	73Iso_Up	0.262289	0	0	0.542203	0.506954
FBgn0267589	asRNA:CR45927	1.11181	0.0306526	73Grp_Up	3.01751	5.24258	3.39129	1.70407	1.73209
FBgn0267613	asRNA:CR45951	1.14827	2.16872e-06	73Grp_Up	17.5916	27.9604	22.736	9.95329	9.71662
FBgn0267808	asRNA:CR46133	2.58441	0.0317271	73Grp_Up	0.561589	1.24823	0.716469	0.154915	0.126739
FBgn0267914	asRNA:CR46195	-1.97472	0.000114978	73Iso_Up	2.52635	0.94311	1.38517	3.67923	4.09788
FBgn0026565	Ass	-4.49479	1.97597e-35	73Iso_Up	11.1863	0.832156	1.43294	18.3574	24.1226
FBgn0032336	AstC	1.43781	3.69457e-18	73Grp_Up	128.222	200.882	188.288	63.0504	60.6655
FBgn0032337	AstCC	1.58615	0.00686196	73Grp_Up	2.04102	2.85707	3.48682	0.890762	0.929416
FBgn0036995	atk	-2.38541	0.0270652	73Iso_Up	19.771	6.29664	7.8334	51.8578	13.0963
FBgn0033778	Balat	-1.58009	0.0453652	73Iso_Up	1.02193	0.527032	0.62094	1.58788	1.35188
FBgn0087007	bbg	-1.17248	8.63458e-08	73Iso_Up	29.6216	22.2463	18.1028	37.412	40.7253
FBgn0035696	Best2	-1.13878	1.3184e-08	73Iso_Up	42.866	28.7926	30.3305	59.9134	52.4275
FBgn0037215	beta-Man	-1.27063	9.65988e-12	73Iso_Up	46.646	32.5095	28.1334	64.5996	61.3415
FBgn0010357	betaTry	-6.84476	1.41098e-05	73Iso_Up	1.74569	0.0277385	0.0477646	0.232373	6.6749
FBgn0003889	betaTub85D	1.5107	0.0038696	73Grp_Up	2.43458	3.80018	3.67788	1.16186	1.0984
FBgn0027348	bgm	-2.39722	5.96906e-18	73Iso_Up	38.1115	15.9219	11.5113	78.5419	46.4708
FBgn0036449	bmm	-1.4751	3.7065e-10	73Iso_Up	76.5362	48.4869	41.4597	130.903	85.295
FBgn0014135	bnl	1.032	8.97697e-06	73Grp_Up	18.6563	26.7122	25.7929	11.3475	10.7728
FBgn0029730	boil	2.38287	0.000392197	73Grp_Up	2.23156	5.51997	2.14941	0.580931	0.675939
FBgn0034331	BomBc2	-2.6733	2.47189e-52	73Iso_Up	81.0043	25.7136	24.1211	148.331	125.851
FBgn0040582	BomBc3	-1.4341	0.000437704	73Iso_Up	30.5952	10.6239	25.7929	46.126	39.8381
FBgn0025583	BomS2	-1.55559	0.0442095	73Iso_Up	62.4123	23.6332	46.0451	113.94	66.0308
FBgn0040736	BomS3	-1.18106	3.55831e-08	73Iso_Up	59.2438	39.8603	40.1701	90.238	66.7067
FBgn0040733	BomS6	-2.85706	0.0290748	73Iso_Up	24.9524	2.21908	11.2247	50.541	35.8248
FBgn0262838	BomT1	-2.20164	0.00347033	73Iso_Up	1.33135	0.332862	0.764234	1.82025	2.40803
FBgn0040735	BomT2	-3.11701	1.5138e-12	73Iso_Up	13.0247	1.77527	4.34658	29.6275	16.3493
FBgn0038930	BomT3	-1.08906	4.5752e-06	73Iso_Up	64.0321	38.9449	51.1559	88.379	77.6485
FBgn0000206	boss	-1.31765	2.83337e-12	73Iso_Up	178.728	130.288	97.4398	250.227	236.959
FBgn0283451	br	1.19224	0.000232124	73Grp_Up	72.0808	142.909	67.1571	40.2779	37.9793
FBgn0264001	bru3	1.21121	1.94637e-10	73Grp_Up	654.56	1102.22	808.655	358.202	349.165
FBgn0040333	brv3	1.0008	0.0106288	73Grp_Up	5.61612	8.09965	7.59458	4.06652	2.70376
FBgn0004863	C15	1.14008	0.0198535	73Grp_Up	3.20444	4.1053	5.11082	1.74279	1.85883
FBgn0036715	Cad74A	-1.831	1.5013e-10	73Iso_Up	9.66923	5.13163	4.39435	13.4776	15.6733
FBgn0261053	Cad86C	-1.15746	0.00237247	73Iso_Up	5.15118	4.13304	2.91364	6.54516	7.01287
FBgn0040629	CAH5	-2.30871	0.000389547	73Iso_Up	1.38268	0.527032	0.525411	2.32373	2.15456
FBgn0039486	CAH9	-2.2108	1.10559e-09	73Iso_Up	5.46536	2.02491	2.38823	7.90067	9.54764
FBgn0037646	CAHbeta	-1.03907	4.9683e-05	73Iso_Up	14.0647	9.76396	10.556	18.28	17.6589
FBgn0031883	Caper	1.05342	1.14045e-09	73Grp_Up	489.257	741.867	642.434	276.794	295.934
FBgn0002022	Catsup	-1.28603	9.20262e-09	73Iso_Up	33.749	20.4433	23.1181	43.5699	47.8649
FBgn0039007	CCAP	1.95306	2.4957e-05	73Grp_Up	3.2673	4.90972	5.77952	1.23932	1.14065
FBgn0038199	CCHa1	1.24813	6.64358e-06	73Grp_Up	10.4798	15.6723	15.0936	5.57694	5.5765
FBgn0033058	CCHa2-R	1.00196	0.00347729	73Grp_Up	7.58566	12.094	9.12304	5.1122	4.01339
FBgn0263986	cd	-1.17609	0.0452222	73Iso_Up	2.74052	2.60742	1.09859	3.83415	3.42194
FBgn0052499	Cda4	1.93034	0.00385531	73Grp_Up	2.1881	3.55053	3.58235	1.23932	0.380216
FBgn0038865	cDIP	-1.80039	7.36739e-11	73Iso_Up	16.6772	7.37845	9.26634	28.8142	21.2498
FBgn0029092	ced-6	-1.13944	5.07953e-08	73Iso_Up	143.71	88.7633	108.999	196.897	180.18
FBgn0039207	Cftr	-1.15742	3.81156e-08	73Iso_Up	27.2798	19.9995	17.3863	35.3594	36.374
FBgn0032785	CG10026	-1.34976	4.41486e-07	73Iso_Up	11.9027	7.90548	6.97364	18.2412	14.4904
FBgn0031563	CG10031	-2.55583	1.28157e-22	73Iso_Up	18.0959	5.13163	6.83034	32.4547	27.967
FBgn0034439	CG10062	-1.81035	1.0104e-07	73Iso_Up	5.75324	2.85707	2.86588	9.64346	7.64656
FBgn0032801	CG10165	-1.20626	0.00347033	73Iso_Up	4.92517	2.69064	3.9167	7.00991	6.08345
FBgn0038397	CG10185	-1.67603	0.00271368	73Iso_Up	1.96926	1.13728	0.955293	3.29194	2.49252
FBgn0035695	CG10226	-1.08581	1.28157e-09	73Iso_Up	83.6538	64.1315	54.3084	109.293	106.883
FBgn0032783	CG10237	-1.53323	1.08202e-12	73Iso_Up	58.1845	38.4178	28.2289	92.3294	73.7618
FBgn0034972	CG10339	-1.06013	0.00417293	73Iso_Up	4.90813	3.63375	3.39129	6.31279	6.29468
FBgn0027562	CG10345	-3.30287	1.05269e-64	73Iso_Up	37.3706	7.96095	7.78563	69.4794	64.2564
FBgn0030348	CG10352	-1.90624	5.43879e-08	73Iso_Up	5.35011	2.44099	2.62705	9.0238	7.30859
FBgn0032699	CG10383	-1.04883	0.008635	73Iso_Up	54.4567	40.9143	36.8265	101.431	38.6553
FBgn0034494	CG10444	-1.08188	1.14943e-08	73Iso_Up	43.1794	32.3986	28.8021	56.8926	54.6243
FBgn0035679	CG10467	-1.07849	0.000604801	73Iso_Up	9.82345	6.51855	7.45128	11.425	13.899
FBgn0035670	CG10472	1.77233	0.000293928	73Grp_Up	2.93481	4.54912	4.82423	1.39424	0.971662
FBgn0039324	CG10553	-2.38119	2.09531e-16	73Iso_Up	27.0426	7.46166	12.2277	44.4606	44.0205
FBgn0039325	CG10560	-1.72445	8.48393e-05	73Iso_Up	3.22824	1.55336	1.81506	5.15093	4.3936
FBgn0039326	CG10562	-1.18558	1.1087e-05	73Iso_Up	10.9123	7.21201	7.54681	14.9493	13.9412
FBgn0032726	CG10621	-2.2755	3.88708e-16	73Iso_Up	60.3811	18.03	28.5632	89.2311	105.7
FBgn0032836	CG10680	-2.26244	1.31241e-26	73Iso_Up	85.635	29.4583	37.1609	136.635	139.286
FBgn0033821	CG10799	-1.96614	1.83273e-09	73Iso_Up	18.7123	6.15795	10.9381	30.6732	27.0798
FBgn0037238	CG1090	-1.23346	9.6143e-07	73Iso_Up	102.547	84.9076	51.1559	148.99	125.133
FBgn0034289	CG10910	-6.60102	0.00834116	73Iso_Up	0.273721	0	0	0.0387288	1.05615
FBgn0034295	CG10911	-5.63379	0.00277123	73Iso_Up	0.677488	0.055477	0	0.0774575	2.57702
FBgn0037228	CG1092	-2.3999	4.04377e-13	73Iso_Up	6.61469	2.6629	2.10164	9.99202	11.7022
FBgn0030073	CG10962	-3.10552	3.61132e-22	73Iso_Up	8.62874	1.9417	2.19717	13.4776	16.8985
FBgn0039241	CG11089	-1.98236	0.00575146	73Iso_Up	131.044	60.0816	57.7952	294.261	112.037
FBgn0030518	CG11134	-1.20786	0.000299555	73Iso_Up	12.7121	7.10106	9.93504	14.7169	19.0953
FBgn0031734	CG11147	-2.12106	4.53315e-18	73Iso_Up	50.5722	25.9633	16.6699	90.6253	69.0303
FBgn0034500	CG11200	-1.5856	1.44314e-11	73Iso_Up	23.143	11.7334	14.0906	33.9651	32.783
FBgn0037290	CG1124	-1.08083	9.55981e-08	73Iso_Up	64.0411	43.5217	47.0482	90.8189	74.7757
FBgn0037070	CG11309	-1.22958	4.10298e-10	73Iso_Up	49.6214	31.4832	34.1995	67.6591	65.1436
FBgn0039816	CG11317	1.28399	2.75326e-11	73Grp_Up	102.929	173.116	131.305	54.9948	52.3008
FBgn0035546	CG11345	3.61127	0.0113525	73Grp_Up	0.866641	0.416078	2.81811	0.232373	0
FBgn0037454	CG1137	4.67757	1.56839e-10	73Grp_Up	2.51432	5.71413	4.01223	0.0774575	0.253477
FBgn0034198	CG11400	-2.00808	4.20375e-12	73Iso_Up	29.8942	10.2355	16.431	50.5798	42.3307
FBgn0026876	CG11403	1.09161	0.00628492	73Grp_Up	5.21089	6.57403	8.26328	3.17576	2.83049
FBgn0035022	CG11413	2.77375	0.00667598	73Grp_Up	28.2838	37.6689	62.5239	10.0695	2.87274
FBgn0037167	CG11425	-1.27999	1.0606e-05	73Iso_Up	22.9067	13.786	15.7146	38.3415	23.7846
FBgn0037166	CG11426	-2.60403	3.4319e-37	73Iso_Up	76.5785	22.0799	26.987	128.734	128.513
FBgn0037396	CG11459	-1.84968	0.00926248	73Iso_Up	3.71698	0.610247	3.00917	5.46076	5.78773
FBgn0036264	CG11529	-2.27693	1.25804e-09	73Iso_Up	4.43021	1.803	1.624	6.81626	7.47757
FBgn0039864	CG11550	-1.10806	0.000507165	73Iso_Up	16.0249	11.1231	11.2247	26.3743	15.3776
FBgn0035484	CG11594	-1.88887	9.08974e-15	73Iso_Up	102.867	46.6007	51.8246	129.78	183.264
FBgn0033283	CG11635	2.86341	0.0105288	73Grp_Up	0.666759	1.52562	0.859763	0.154915	0.126739
FBgn0030638	CG11655	-1.12205	1.36762e-06	73Iso_Up	18.7264	13.4254	12.6099	26.6067	22.2637
FBgn0040531	CG11741	-2.8874	7.28097e-09	73Iso_Up	7.36998	0.998587	3.00917	15.3753	10.0968
FBgn0039628	CG11841	-1.89989	1.17085e-22	73Iso_Up	34.0134	16.4489	15.8579	51.7416	52.005
FBgn0039629	CG11842	-1.38917	2.06937e-10	73Iso_Up	21.3163	13.37	12.8009	31.7189	27.3755
FBgn0039297	CG11852	1.27613	0.00161779	73Grp_Up	8.37973	12.6488	12.0367	6.00296	2.83049
FBgn0039313	CG11892	-1.65982	0.00183249	73Iso_Up	2.21078	1.13728	1.24188	3.71796	2.746
FBgn0014427	CG11899	-1.45506	5.52485e-11	73Iso_Up	92.8388	49.1249	60.8521	145.581	115.797
FBgn0039656	CG11951	-1.50656	6.52657e-08	73Iso_Up	11.1387	7.51714	5.3974	15.8401	15.8001
FBgn0034436	CG11961	-1.3479	3.89678e-08	73Iso_Up	15.1486	10.4852	8.5021	20.5262	21.0808
FBgn0035257	CG12011	2.29135	0.0200554	73Grp_Up	0.822403	1.22049	1.57623	0.154915	0.337969
FBgn0039808	CG12071	1.03525	0.00010377	73Grp_Up	133.055	238.801	136.989	77.7674	78.6624
FBgn0037386	CG1208	-1.23519	2.11217e-05	73Iso_Up	9.69949	6.82368	5.97058	14.6395	11.3642
FBgn0030041	CG12116	-1.74875	1.83852e-10	73Iso_Up	212.764	83.2988	134.075	298.754	334.928
FBgn0037387	CG1213	-1.49109	6.17794e-19	73Iso_Up	145.547	89.0129	81.0566	220.87	191.248
FBgn0029810	CG12239	1.54298	6.81055e-18	73Grp_Up	1357.18	2088.68	2102.55	579.344	658.153
FBgn0039131	CG12268	-1.16397	0.00861522	73Iso_Up	3.62328	2.82933	2.10164	5.42203	4.14013
FBgn0032620	CG12288	1.5324	0.000332737	73Grp_Up	4.01852	6.79594	5.58846	2.16881	1.52086
FBgn0035134	CG1231	1.05052	0.000154364	73Grp_Up	11.032	15.4504	15.7146	6.58389	6.37917
FBgn0033558	CG12344	-1.73046	5.14055e-09	73Iso_Up	9.4232	5.63092	4.10776	15.4915	12.4626
FBgn0035481	CG12605	1.14488	4.25509e-06	73Grp_Up	375.936	679.732	405.378	205.417	213.216
FBgn0030886	CG12672	1.80312	5.0286e-08	73Grp_Up	9.81365	19.4724	12.0367	4.02779	3.71766
FBgn0035476	CG12766	-1.59574	0.030529	73Iso_Up	1.38668	0.55477	1.00306	1.66534	2.32354
FBgn0037779	CG12811	-1.14668	0.000299128	73Iso_Up	13.8357	7.65583	11.368	18.28	18.0391
FBgn0033140	CG12836	1.65659	0.0219801	73Grp_Up	1.31688	2.27456	1.86282	0.580931	0.5492
FBgn0039523	CG12885	-1.11964	0.0484786	73Iso_Up	2.18972	1.803	1.24188	2.67228	3.04172
FBgn0030798	CG13003	-1.63146	9.01648e-08	73Iso_Up	10.9007	7.32297	4.53764	17.0407	14.7017
FBgn0036656	CG13026	-1.13081	0.0166903	73Iso_Up	2.95348	2.27456	1.81506	3.79542	3.92889
FBgn0036590	CG13065	3.13892	1.04497e-05	73Grp_Up	1.57376	2.77385	2.96141	0.348559	0.211231
FBgn0032803	CG13082	1.21223	5.4196e-05	73Grp_Up	9.31752	14.8124	12.371	4.76364	5.32302
FBgn0032780	CG13085	-1.54797	0.0445111	73Iso_Up	1.09439	0.582509	0.668705	1.39424	1.73209
FBgn0032770	CG13086	-2.30238	4.52745e-15	73Iso_Up	7.96001	3.32862	2.72258	13.284	12.5049
FBgn0032084	CG13101	-1.34815	0.00570577	73Iso_Up	2.71768	1.83074	1.57623	3.40813	4.05563
FBgn0032100	CG13108	1.1512	2.65289e-07	73Grp_Up	36.5012	48.5147	56.6011	20.991	19.898
FBgn0032150	CG13123	1.26714	0.00204948	73Grp_Up	4.20896	6.90689	5.49293	2.32373	2.11231
FBgn0032181	CG13133	-1.65997	0.00272008	73Iso_Up	1.94092	1.0818	1.00306	3.05957	2.61926
FBgn0033767	CG13148	1.07411	0.00052768	73Grp_Up	10.5136	14.3408	15.4757	7.12609	5.11179
FBgn0040827	CG13315	-1.73421	2.58722e-08	73Iso_Up	202.648	71.9815	135.556	328.033	275.023
FBgn0033863	CG13337	2.28534	2.3762e-10	73Grp_Up	7.62887	14.8678	11.0814	1.82025	2.746
FBgn0025620	CG13360	-2.03364	1.9456e-12	73Iso_Up	34.6994	11.7889	18.8193	50.7347	57.4548
FBgn0014417	CG13397	-1.38822	4.7993e-07	73Iso_Up	10.3028	6.62951	6.01834	15.7626	12.8006
FBgn0034515	CG13428	-1.94721	1.30881e-09	73Iso_Up	10.2607	5.82509	3.63011	18.28	13.3075
FBgn0036442	CG13473	2.70467	0.000128144	73Grp_Up	1.46357	2.49647	2.67482	0.387288	0.295723
FBgn0040658	CG13516	-1.50324	0.000280358	73Iso_Up	3.62561	2.02491	2.19717	5.42203	4.85831
FBgn0034870	CG13559	-1.72076	0.0132984	73Iso_Up	1.2723	0.74894	0.573176	1.78152	1.98557
FBgn0039151	CG13607	-3.14393	4.29698e-32	73Iso_Up	57.2476	11.0122	15.619	87.4495	114.91
FBgn0039203	CG13618	-1.27174	0.00455067	73Iso_Up	7.92138	3.46731	6.83034	9.17872	12.2091
FBgn0039315	CG13658	-2.14885	0.00273797	73Iso_Up	1.61275	0.360601	1.00306	2.59483	2.49252
FBgn0035873	CG13670	-1.14517	0.00140783	73Iso_Up	5.66122	3.80018	4.01223	6.93245	7.90004
FBgn0035845	CG13675	3.50102	0.0291778	73Grp_Up	0.416203	0.832156	0.716469	0.116186	0
FBgn0035856	CG13679	1.38488	0.024071	73Grp_Up	1.87388	2.57968	3.05694	0.92949	0.929416
FBgn0035553	CG13722	2.76384	0.0467604	73Grp_Up	7.95847	21.3309	6.92587	2.94339	0.633693
FBgn0033403	CG13739	1.34579	6.23143e-05	73Grp_Up	93.1883	194.253	85.1643	45.8936	47.4425
FBgn0033355	CG13748	3.06587	0.0340242	73Grp_Up	0.426764	0.832156	0.716469	0.116186	0.0422462
FBgn0031897	CG13784	-1.11391	6.25125e-10	73Iso_Up	116.898	90.1779	73.2232	159.795	144.397
FBgn0031935	CG13793	-1.45551	0.0043713	73Iso_Up	2.4421	1.47014	1.43294	3.95033	2.91499
FBgn0031936	CG13794	-1.98074	1.34005e-16	73Iso_Up	18.6119	7.76678	9.17081	30.0922	27.4178
FBgn0031937	CG13795	-1.2987	0.0274792	73Iso_Up	2.60335	1.10954	2.24494	3.67923	3.37969
FBgn0039040	CG13833	-3.18384	8.75554e-49	73Iso_Up	46.5259	9.37562	11.7501	82.2599	82.718
FBgn0034501	CG13868	-1.03177	3.83747e-10	73Iso_Up	528.825	400.406	365.304	723.841	625.75
FBgn0034506	CG13870	1.44035	0.0155703	73Grp_Up	2.40302	4.77103	2.53153	1.08441	1.22514
FBgn0035157	CG13894	1.03949	0.000220061	73Grp_Up	10.7166	16.3102	13.8995	6.70008	5.95671
FBgn0035186	CG13912	-2.54984	8.28431e-16	73Iso_Up	9.77021	2.63516	3.86894	17.6216	14.9551
FBgn0035286	CG13924	1.14132	0.0199445	73Grp_Up	3.48248	4.57686	5.44517	1.62661	2.28129
FBgn0033405	CG13954	1.34843	3.98353e-06	73Grp_Up	30.1027	57.6406	32.5277	14.9493	15.2931
FBgn0032834	CG13965	-1.97194	0.00805832	73Iso_Up	1.08628	0.471555	0.525411	1.74279	1.60535
FBgn0031650	CG14044	1.00565	0.0294523	73Grp_Up	3.38537	4.93746	4.53764	2.20754	1.85883
FBgn0036359	CG14105	-2.0223	1.67448e-06	73Iso_Up	3.40192	1.41466	1.624	5.49948	5.06954
FBgn0031062	CG14230	1.03969	5.48693e-05	73Grp_Up	16.6131	22.0244	24.7898	9.83711	9.80111
FBgn0039483	CG14259	-1.83443	1.86542e-15	73Iso_Up	18.772	10.4019	8.02446	29.2015	27.46
FBgn0038654	CG14298	-1.25278	2.23975e-07	73Iso_Up	17.3928	11.5392	11.2247	26.0645	20.7429
FBgn0038525	CG14329	-2.42017	0.0122061	73Iso_Up	0.749735	0.166431	0.382117	1.39424	1.05615
FBgn0038510	CG14331	1.34556	0.0058166	73Grp_Up	3.05167	4.43816	4.68093	1.35551	1.73209
FBgn0032896	CG14400	-2.66063	2.66526e-22	73Iso_Up	11.2339	3.18993	3.82117	19.2095	18.7151
FBgn0033464	CG1441	-1.9721	9.49483e-14	73Iso_Up	24.8332	9.34788	13.3263	38.3415	38.3173
FBgn0029898	CG14439	-1.46626	6.06385e-12	73Iso_Up	28.2136	16.6154	16.8131	38.1091	41.3168
FBgn0037183	CG14451	5.03592	0.0172822	73Grp_Up	0.390276	0.471555	1.05082	0.0387288	0
FBgn0034293	CG14495	-3.35059	2.85017e-11	73Iso_Up	3.28454	0.471555	0.907528	6.81626	4.9428
FBgn0034321	CG14502	-1.90892	0.00144921	73Iso_Up	1.62802	0.776678	0.764234	2.47864	2.49252
FBgn0039641	CG14511	-1.24679	0.0387663	73Iso_Up	2.22627	1.0818	1.86282	2.74974	3.21071
FBgn0037129	CG14565	2.74517	0.0369035	73Grp_Up	0.623628	1.83074	0.382117	0.154915	0.126739
FBgn0037126	CG14567	-1.84468	8.27325e-12	73Iso_Up	12.0659	5.51997	6.30493	17.4279	19.0108
FBgn0037488	CG14607	-6.69322	0.00160071	73Iso_Up	0.296612	0	0	0.426016	0.760431
FBgn0031184	CG14615	-2.55423	2.88611e-18	73Iso_Up	8.77877	2.88481	2.91364	16.3048	13.0118
FBgn0040398	CG14629	-2.81508	3.38773e-24	73Iso_Up	145.546	31.5664	50.5827	221.8	278.233
FBgn0037288	CG14661	-1.35431	1.14928e-14	73Iso_Up	108.895	73.2574	62.7627	160.569	138.99
FBgn0030157	CG1468	-1.2768	3.20916e-08	73Iso_Up	36.7473	21.2477	26.3183	49.5728	49.8505
FBgn0037850	CG14695	1.29237	0.0381163	73Grp_Up	1.90864	2.49647	3.15247	0.92949	1.05615
FBgn0033307	CG14752	2.13172	0.0114488	73Grp_Up	1.60725	1.63657	3.72564	0.813304	0.253477
FBgn0029573	CG14770	2.88238	2.51892e-05	73Grp_Up	1.62642	2.91254	2.91364	0.426016	0.253477
FBgn0035734	CG14823	-1.01413	5.89646e-07	73Iso_Up	43.9404	33.0921	31.1425	53.0584	58.4687
FBgn0038455	CG14907	-1.79918	0.000752634	73Iso_Up	2.83843	1.83074	1.00306	3.40813	5.11179
FBgn0035414	CG14965	1.00604	0.0338029	73Grp_Up	3.49156	5.24258	4.53764	1.82025	2.36579
FBgn0035495	CG14989	1.15502	4.92801e-12	73Grp_Up	1886.92	2672.41	2768.29	1053.23	1053.75
FBgn0034397	CG15082	1.00616	0.000256707	73Grp_Up	12.4895	16.8095	18.1506	7.43592	7.56207
FBgn0034390	CG15093	-1.52911	6.39765e-12	73Iso_Up	37.0453	19.2228	23.2614	52.5937	53.1034
FBgn0034394	CG15096	-2.52712	6.07184e-34	73Iso_Up	90.7094	27.0451	33.5785	162.506	139.708
FBgn0034398	CG15098	-1.13938	7.591e-11	73Iso_Up	184.554	129.65	124.761	264.169	219.638
FBgn0030270	CG15199	-2.07738	2.33376e-05	73Iso_Up	3.9012	1.10954	2.2927	5.6544	6.54816
FBgn0030271	CG15202	-1.06062	5.68008e-06	73Iso_Up	17.7026	13.5364	11.7979	22.5789	22.8974
FBgn0030261	CG15203	-1.39982	8.70482e-06	73Iso_Up	20.797	9.70848	15.6668	27.6911	30.1215
FBgn0030234	CG15211	-1.06325	2.22009e-05	73Iso_Up	13.3732	9.84717	9.26634	17.3118	17.0675
FBgn0033104	CG15237	1.20249	2.79879e-06	73Grp_Up	24.8042	31.7606	40.3611	13.7874	13.3075
FBgn0030156	CG15247	-1.0876	4.26745e-05	73Iso_Up	14.2174	9.70848	10.4127	17.273	19.4755
FBgn0028526	CG15293	-2.72675	3.09063e-43	73Iso_Up	95.2814	25.7413	31.047	164.52	159.817
FBgn0030174	CG15312	1.4291	7.12149e-13	73Grp_Up	54.6303	92.9518	72.7455	26.3356	26.4884
FBgn0030029	CG15343	-1.41444	0.000146956	73Iso_Up	6.53549	3.52279	4.44211	7.78448	10.3926
FBgn0030040	CG15347	-1.84029	1.81249e-06	73Iso_Up	4.25722	2.08039	2.10164	6.00296	6.84388
FBgn0030105	CG15369	-1.78756	0.0474605	73Iso_Up	0.92393	0.277385	0.668705	1.35551	1.39412
FBgn0031460	CG15399	-1.96335	2.12507e-07	73Iso_Up	7.1394	3.24541	3.34352	8.36541	13.6033
FBgn0039827	CG1544	-1.90354	1.88019e-12	73Iso_Up	24.1524	10.18	12.7532	32.1061	41.5702
FBgn0039768	CG15533	-2.18353	0.0053449	73Iso_Up	1.05177	0.388339	0.477646	1.35551	1.98557
FBgn0039770	CG15537	1.22635	4.60996e-12	73Grp_Up	117.803	170.453	173.911	62.973	63.8762
FBgn0039817	CG15553	-1.42301	6.52686e-08	73Iso_Up	16.375	11.4005	8.35881	25.7159	20.0247
FBgn0039821	CG15556	-1.60428	4.01522e-06	73Iso_Up	5.22069	3.13445	2.62705	7.9394	7.18185
FBgn0040906	CG15579	1.49849	0.0471144	73Grp_Up	1.26293	1.91396	1.95835	0.503474	0.675939
FBgn0030451	CG15717	-2.38564	0.0405946	73Iso_Up	0.772778	0.055477	0.525411	1.20059	1.30963
FBgn0030347	CG15739	-1.63148	1.41146e-10	73Iso_Up	11.8796	6.51855	6.44823	17.273	17.2787
FBgn0029799	CG15772	1.02773	3.27023e-08	73Grp_Up	56.1389	83.3542	74.5128	35.0883	31.6001
FBgn0030218	CG1628	-2.50875	1.02132e-27	73Iso_Up	35.0604	11.3173	12.5143	52.3226	64.0875
FBgn0030027	CG1632	-1.38871	4.28993e-12	73Iso_Up	42.2934	28.4597	23.5957	56.6215	60.4965
FBgn0031558	CG16704	-3.51562	9.47129e-16	73Iso_Up	11.728	1.10954	3.24799	23.5858	18.9685
FBgn0031560	CG16713	-2.00292	1.87836e-07	73Iso_Up	10.5005	3.13445	6.30493	16.3823	16.1803
FBgn0034505	CG16739	1.6365	9.92329e-08	73Grp_Up	8.16413	12.6765	12.8965	3.40813	3.67542
FBgn0037678	CG16749	1.01803	0.01529	73Grp_Up	4.74298	7.35071	5.97058	2.43991	3.21071
FBgn0035393	CG16753	1.0817	0.00252243	73Grp_Up	10.2061	11.5947	17.3863	5.88677	5.95671
FBgn0029765	CG16756	-3.20615	5.76375e-30	73Iso_Up	27.6699	5.13163	7.30799	42.6016	55.6382
FBgn0032835	CG16772	-1.56864	1.47315e-07	73Iso_Up	43.117	31.8716	17.0042	56.0405	67.5516
FBgn0034538	CG16799	-1.49995	1.26639e-06	73Iso_Up	8.66381	4.4659	5.63623	12.9354	11.6177
FBgn0032495	CG16820	-1.40713	0.00145087	73Iso_Up	4.75669	2.13587	3.67788	6.62262	6.5904
FBgn0034480	CG16898	-2.7701	1.30914e-21	73Iso_Up	8.73878	2.52421	2.57929	14.6007	15.2509
FBgn0040732	CG16926	-2.17557	1.16407e-12	73Iso_Up	10.0544	5.04841	3.15247	15.414	16.6027
FBgn0032387	CG16965	-1.83769	3.03513e-07	73Iso_Up	5.36626	2.85707	2.38823	9.33363	6.88613
FBgn0040972	CG16978	-1.67982	2.73486e-05	73Iso_Up	6.15657	2.41325	4.15552	9.566	8.49148
FBgn0036547	CG17032	-1.28444	4.3339e-08	73Iso_Up	22.498	13.5364	15.5235	30.0922	30.8397
FBgn0032449	CG17036	-1.30864	0.0303152	73Iso_Up	1.96697	0.998587	1.52847	2.59483	2.746
FBgn0032281	CG17107	-1.29466	0.0128972	73Iso_Up	2.34247	1.4424	1.57623	3.0983	3.25296
FBgn0039944	CG17162	-3.42803	0.024242	73Iso_Up	0.392905	0.138693	0	0.968219	0.464708
FBgn0039941	CG17167	-1.18676	0.00440337	73Iso_Up	3.67019	2.52421	2.436	5.07347	4.64708
FBgn0039485	CG17189	-2.5314	2.16383e-06	73Iso_Up	2.10226	0.693463	0.716469	3.87288	3.12622
FBgn0031168	CG1722	1.90944	0.00012208	73Grp_Up	5.89182	13.6751	5.5407	1.85898	2.49252
FBgn0038821	CG17267	2.54162	0.0240051	73Grp_Up	0.692179	1.55336	0.859763	0.271101	0.0844924
FBgn0032029	CG17292	-1.3512	2.0349e-08	73Iso_Up	24.0974	13.5087	16.6221	33.7715	32.4873
FBgn0038879	CG17298	3.79679	0.0186566	73Grp_Up	3.56915	12.1772	1.28965	0.387288	0.422462
FBgn0040028	CG17450	2.53262	0.0341172	73Grp_Up	0.54975	1.05406	0.859763	0.116186	0.168985
FBgn0032774	CG17549	-1.00378	8.55369e-10	73Iso_Up	283.278	213.836	201.423	378.109	339.744
FBgn0264494	CG17646	-1.22444	1.29984e-10	73Iso_Up	99.0602	73.2574	58.3206	143.839	120.824
FBgn0033439	CG1773	-1.82879	9.03596e-05	73Iso_Up	3.4809	1.30371	2.14941	5.6544	4.81606
FBgn0033710	CG17739	-1.24657	1.19011e-13	73Iso_Up	518.733	336.857	344.574	690.147	703.357
FBgn0039856	CG1774	-1.74558	1.19011e-13	73Iso_Up	21.5923	10.4019	11.8456	30.7894	33.3322
FBgn0035425	CG17746	1.54738	2.00918e-18	73Grp_Up	73.9092	117.916	110.384	35.8628	31.4734
FBgn0030114	CG17754	1.86344	3.39456e-19	73Grp_Up	112.505	181.077	182.461	50.6572	35.8248
FBgn0033756	CG17760	1.08357	0.0293642	73Grp_Up	3.05741	4.16078	4.53764	1.58788	1.94332
FBgn0039167	CG17786	1.49825	0.00830919	73Grp_Up	4.04363	8.87633	3.53458	2.285	1.47862
FBgn0038547	CG17803	1.01579	3.58927e-05	73Grp_Up	16.1133	22.9952	22.2106	9.48855	9.75887
FBgn0038548	CG17806	1.04269	0.000500111	73Grp_Up	13.2297	22.0799	15.2847	7.35846	8.19576
FBgn0028480	CG17841	-1.04066	3.72151e-07	73Iso_Up	237.806	161.216	181.792	284.695	323.521
FBgn0030163	CG1791	-1.37252	4.26501e-05	73Iso_Up	6.3454	4.18852	3.67788	8.09431	9.4209
FBgn0037433	CG17919	-1.27738	1.22532e-10	73Iso_Up	33.611	22.4959	21.0164	48.6433	42.2884
FBgn0032603	CG17928	-2.53942	4.09056e-34	73Iso_Up	29.3967	10.7903	8.78869	47.9462	50.0617
FBgn0032791	CG18094	-1.98963	0.00106266	73Iso_Up	1.84808	0.637986	1.05082	3.25322	2.45028
FBgn0035262	CG18171	1.45739	1.75561e-09	73Grp_Up	15.7203	24.8537	23.0226	7.35846	7.64656
FBgn0037553	CG18249	-2.70653	3.10886e-19	73Iso_Up	8.17424	2.38551	2.57929	13.284	14.4482
FBgn0032266	CG18302	-2.7046	4.44131e-10	73Iso_Up	3.70382	1.13728	1.09859	7.55211	5.0273
FBgn0033683	CG18343	-1.44612	0.00144769	73Iso_Up	7.36403	2.80159	5.97058	11.8123	8.8717
FBgn0033864	CG18368	2.86691	1.43187e-08	73Grp_Up	3.38836	7.15654	4.96752	0.542203	0.88717
FBgn0039149	CG18428	1.63503	4.78597e-18	73Grp_Up	45.427	75.9758	66.2973	20.7199	18.7151
FBgn0034218	CG18467	1.12665	1.78378e-05	73Grp_Up	74.6505	90.3166	123.233	48.7208	36.3317
FBgn0034322	CG18536	-3.47731	0.00366561	73Iso_Up	0.520144	0.138693	0.0477646	1.00695	0.88717
FBgn0037973	CG18547	-1.07594	0.00461452	73Iso_Up	12.3913	6.26891	11.2725	17.1956	14.8284
FBgn0038592	CG18599	1.51967	0.00291411	73Grp_Up	2.69763	4.71555	3.58235	1.39424	1.0984
FBgn0042125	CG18787	1.0263	0.0289672	73Grp_Up	3.41827	5.07615	4.53764	1.82025	2.23905
FBgn0042127	CG18789	1.66235	0.00478043	73Grp_Up	1.99194	2.96802	3.29576	0.774575	0.929416
FBgn0030164	CG1889	-1.51202	2.80211e-08	73Iso_Up	10.6496	6.01926	6.30493	16.4597	13.8145
FBgn0033214	CG1941	-1.11845	0.0102888	73Iso_Up	3.66013	2.71837	2.38823	4.33762	5.19628
FBgn0026563	CG1979	-3.96321	6.74984e-15	73Iso_Up	8.10277	1.22049	1.05082	7.70702	22.4327
FBgn0039886	CG2003	-1.12095	0.000751556	73Iso_Up	6.14519	4.35495	4.20329	8.24923	7.7733
FBgn0030060	CG2004	-1.10432	9.84311e-06	73Iso_Up	39.3141	23.6332	31.3336	54.7625	47.527
FBgn0030251	CG2145	-1.87749	9.90797e-18	73Iso_Up	68.6719	28.7648	37.0176	107.008	101.898
FBgn0029990	CG2233	-3.65931	5.0129e-73	73Iso_Up	1420.15	207.207	268.246	2682.28	2522.86
FBgn0029995	CG2256	1.15248	0.0307615	73Grp_Up	2.90239	3.49505	4.87199	1.51042	1.73209
FBgn0032864	CG2493	-2.1211	2.43441e-25	73Iso_Up	37.8046	15.062	16.8131	59.5648	59.7783
FBgn0037518	CG2641	-1.27621	0.0100481	73Iso_Up	2.60118	1.88622	1.4807	3.44686	3.59093
FBgn0024993	CG2662	1.05967	0.000920666	73Grp_Up	7.93809	10.7625	11.7023	4.72491	4.56259
FBgn0014931	CG2678	-1.50787	0.012698	73Iso_Up	2.12517	0.859894	1.624	3.05957	2.95723
FBgn0035090	CG2736	-3.24292	2.61749e-45	73Iso_Up	80.093	15.2562	19.7746	131.058	154.283
FBgn0031564	CG2816	-1.4022	0.0215124	73Iso_Up	1.69122	1.10954	0.955293	2.20754	2.49252
FBgn0023526	CG2865	1.04749	1.77977e-10	73Grp_Up	251.768	377.632	333.349	154.102	141.989
FBgn0030195	CG2898	-2.38079	0.0325508	73Iso_Up	0.564442	0.221908	0.191059	0.61966	1.22514
FBgn0260474	CG30002	-2.516	1.33691e-18	73Iso_Up	9.16742	2.96802	3.24799	14.9493	15.5043
FBgn0050026	CG30026	-1.43672	0.000141992	73Iso_Up	8.33538	4.38269	5.58846	14.7944	8.57597
FBgn0050046	CG30046	-2.17258	7.78055e-09	73Iso_Up	10.5134	5.85283	2.72258	19.7904	13.6878
FBgn0050083	CG30083	-3.14554	2.33591e-12	73Iso_Up	3.28872	0.887633	0.62094	5.73186	5.91447
FBgn0050098	CG30098	-3.09665	0.0174841	73Iso_Up	0.534022	0.19417	0.0477646	1.47169	0.422462
FBgn0050148	CG30148	-2.10699	2.00212e-05	73Iso_Up	2.54201	1.02633	1.14635	3.60177	4.3936
FBgn0050151	CG30151	-1.44616	2.87272e-06	73Iso_Up	9.26214	4.8265	6.25717	13.6713	12.2936
FBgn0050203	CG30203	-1.20458	5.9435e-08	73Iso_Up	19.2638	13.5364	12.2755	26.5292	24.714
FBgn0031645	CG3036	-1.24194	3.33799e-09	73Iso_Up	176.58	123.409	108.665	278.266	195.98
FBgn0050403	CG30403	1.44355	0.0195744	73Grp_Up	1.95159	2.77385	3.15247	1.16186	0.718185
FBgn0050411	CG30411	2.22343	0.0161484	73Grp_Up	1.08515	1.0818	2.57929	0.426016	0.253477
FBgn0043792	CG30427	-2.09212	6.21456e-12	73Iso_Up	8.02679	3.63375	3.24799	11.5799	13.6455
FBgn0050431	CG30431	-2.45034	4.9199e-19	73Iso_Up	12.4478	4.27173	4.48988	18.5123	22.5172
FBgn0050440	CG30440	-1.21493	0.00756651	73Iso_Up	4.55586	2.57968	3.48682	7.55211	4.60483
FBgn0029608	CG3091	-1.0201	9.45106e-08	73Iso_Up	44.8928	35.117	30.2828	58.829	55.3425
FBgn0051051	CG31051	1.15999	5.20745e-07	73Grp_Up	19.9576	29.0145	28.611	10.8828	11.322
FBgn0051103	CG31103	-1.19008	7.4258e-06	73Iso_Up	15.0577	11.8998	8.40657	20.9135	19.0108
FBgn0051161	CG31161	1.26919	0.000289651	73Grp_Up	6.01269	9.7917	7.92893	3.33067	2.99948
FBgn0051205	CG31205	-2.45926	1.85521e-11	73Iso_Up	12.4099	5.99152	2.67482	18.2025	22.7707
FBgn0051207	CG31207	-1.37161	1.75261e-05	73Iso_Up	15.6427	7.57262	11.7501	23.8569	19.391
FBgn0051211	CG31211	1.12384	8.74144e-11	73Grp_Up	432.602	682.589	558.846	242.171	246.802
FBgn0051272	CG31272	-1.30843	0.0308184	73Iso_Up	2.06597	1.71979	0.907528	2.59483	3.04172
FBgn0051300	CG31300	-1.20045	3.69654e-06	73Iso_Up	12.6864	9.20919	7.8334	16.3823	17.3209
FBgn0051313	CG31313	-1.63725	1.1697e-15	73Iso_Up	99.8411	49.5133	58.8938	141.321	149.636
FBgn0051321	CG31321	-1.26666	4.6735e-06	73Iso_Up	9.99026	6.46307	6.54375	14.4071	12.5471
FBgn0051326	CG31326	-1.17658	4.81898e-07	73Iso_Up	46.6522	28.7094	34.3905	69.5181	53.9906
FBgn0051380	CG31380	-2.02485	0.00668879	73Iso_Up	1.62441	0.94311	0.477646	3.6405	1.43637
FBgn0051445	CG31445	-2.54834	3.62866e-21	73Iso_Up	18.7623	7.21201	5.15858	36.9085	25.7702
FBgn0051495	CG31495	-1.83965	0.00555922	73Iso_Up	1.40879	0.665724	0.716469	2.47864	1.77434
FBgn0051523	CG31523	-1.05716	5.1389e-09	73Iso_Up	90.653	65.4074	64.2912	125.481	107.432
FBgn0051548	CG31548	-1.25387	2.68295e-07	73Iso_Up	28.4845	16.5599	20.7298	37.5282	39.12
FBgn0051550	CG31550	1.03857	1.02133e-08	73Grp_Up	182.07	283.821	229.843	106.001	108.615
FBgn0051627	CG31627	1.33788	0.0088727	73Grp_Up	3.51947	3.99435	6.49599	1.89771	1.68985
FBgn0051636	CG31636	-1.80162	4.13376e-06	73Iso_Up	3.88968	2.02491	1.86282	5.9255	5.74548
FBgn0288229	CG3164	-1.97522	1.67644e-34	73Iso_Up	193.897	88.9574	87.6959	311.999	286.936
FBgn0051664	CG31664	-2.68565	4.28693e-14	73Iso_Up	8.79326	2.69064	2.72258	11.425	18.3348
FBgn0051687	CG31687	1.24701	0.000735916	73Grp_Up	7.61511	13.5919	8.78869	3.60177	4.4781
FBgn0031449	CG31689	-1.59542	1.78471e-18	73Iso_Up	86.5986	50.1235	45.9018	137.952	112.417
FBgn0028490	CG31705	-1.49982	6.2505e-19	73Iso_Up	339.464	214.668	180.646	517.649	444.895
FBgn0051729	CG31729	-1.15857	4.2872e-12	73Iso_Up	217.357	158.47	138.995	304.292	267.672
FBgn0051777	CG31777	-2.22719	1.67443e-12	73Iso_Up	10.5456	3.35636	5.06305	17.1181	16.645
FBgn0051778	CG31778	-3.11965	1.46905e-43	73Iso_Up	24.0128	5.85283	5.44517	47.3653	37.3879
FBgn0051815	CG31815	4.76432	5.07387e-05	73Grp_Up	0.981055	1.9417	1.86282	0.0774575	0.0422462
FBgn0032079	CG31886	-1.01212	0.000300602	73Iso_Up	10.2875	7.35071	7.69011	13.4776	12.6316
FBgn0031360	CG31937	-1.51731	1.21529e-10	73Iso_Up	31.793	16.1438	20.491	47.404	43.1334
FBgn0043806	CG32032	-1.05461	1.11673e-06	73Iso_Up	46.6823	30.762	36.1101	60.4169	59.4404
FBgn0052115	CG32115	-1.94807	0.00160071	73Iso_Up	2.00321	0.637986	1.24188	2.71101	3.42194
FBgn0052191	CG32191	-2.61345	2.12495e-19	73Iso_Up	9.68155	2.77385	3.43905	16.9245	15.5888
FBgn0052195	CG32195	-1.00479	0.000458416	73Iso_Up	9.25169	6.87915	6.68705	12.1608	11.2797
FBgn0052202	CG32202	1.01619	0.00769904	73Grp_Up	9.90513	11.2896	16.431	7.12609	4.77382
FBgn0052204	CG32204	1.01243	2.74176e-08	73Grp_Up	62.5947	91.2875	84.1613	39.2322	35.698
FBgn0037538	CG3223	1.10816	3.80146e-06	73Grp_Up	32.1187	45.5466	46.1406	21.4945	15.2931
FBgn0047135	CG32276	-1.01604	1.76324e-05	73Iso_Up	77.7321	49.8461	63.3837	93.6461	104.052
FBgn0043783	CG32444	-3.45229	3.3705e-05	73Iso_Up	355.41	45.186	90.705	424.855	860.893
FBgn0031538	CG3246	-2.73643	1.43012e-35	73Iso_Up	74.1317	19.0009	24.9331	125.559	127.034
FBgn0052512	CG32512	-1.80899	1.24641e-12	73Iso_Up	12.7739	6.10247	6.63928	19.132	19.222
FBgn0052532	CG32532	1.18464	0.000145959	73Grp_Up	16.4517	30.0408	17.7684	8.83016	9.16742
FBgn0052554	CG32554	1.02298	0.0343574	73Grp_Up	3.11617	4.21625	4.53764	1.93644	1.77434
FBgn0052687	CG32687	-1.63131	6.81941e-16	73Iso_Up	80.928	47.4606	40.6477	134.931	100.673
FBgn0052695	CG32695	-2.81664	5.07673e-18	73Iso_Up	14.6877	3.16219	5.15858	29.4339	20.9964
FBgn0267253	CG32700	1.54077	3.14114e-20	73Grp_Up	301.649	506.866	424.723	136.906	138.103
FBgn0052706	CG32706	1.7521	1.43419e-07	73Grp_Up	13.0943	16.338	25.3153	5.6544	5.06954
FBgn0052750	CG32750	-2.50767	0.0253206	73Iso_Up	0.565871	0.110954	0.286588	0.852033	1.01391
FBgn0052755	CG32755	1.34602	0.014531	73Grp_Up	2.44984	3.35636	3.96446	1.08441	1.39412
FBgn0052944	CG32944	1.45268	8.7449e-13	73Grp_Up	61.0879	106.072	79.9102	30.8668	27.5023
FBgn0038878	CG3301	-1.22982	8.47724e-06	73Iso_Up	34.3892	18.3352	27.0825	46.0485	46.0906
FBgn0038877	CG3308	-1.01682	4.87859e-08	73Iso_Up	185.356	153.061	117.788	241.939	228.636
FBgn0053080	CG33080	-1.44179	3.50524e-10	73Iso_Up	61.8104	32.676	41.2686	82.2986	90.9983
FBgn0053120	CG33120	-3.06744	3.61915e-31	73Iso_Up	13.5299	2.99576	3.63011	25.0188	22.475
FBgn0053129	CG33129	-1.00768	2.10466e-06	73Iso_Up	105.754	70.4558	84.1613	131.058	137.342
FBgn0053178	CG33178	-1.79676	2.11438e-07	73Iso_Up	17.5117	6.07474	11.4157	26.9552	25.6012
FBgn0053267	CG33267	1.21078	0.00815937	73Grp_Up	3.33881	5.24258	4.48988	1.97517	1.6476
FBgn0053281	CG33281	3.07375	4.08362e-05	73Grp_Up	2.49177	7.04558	2.00611	0.61966	0.295723
FBgn0053307	CG33307	-3.09326	2.93669e-17	73Iso_Up	22.2082	3.21767	7.40352	40.7814	37.4301
FBgn0053310	CG33310	2.36091	0.00248111	73Grp_Up	2.1734	5.74187	1.71953	0.387288	0.844924
FBgn0053459	CG33459	-3.42222	6.38368e-10	73Iso_Up	2.77118	0.360601	0.764234	4.29889	5.66099
FBgn0053460	CG33460	-2.67192	0.0111976	73Iso_Up	0.597834	0.138693	0.238823	1.08441	0.929416
FBgn0040609	CG3348	-1.86689	0.00137542	73Iso_Up	3.46661	0.887633	2.48376	4.91855	5.5765
FBgn0053493	CG33493	-1.87186	1.45914e-15	73Iso_Up	22.4956	10.7348	10.9859	31.2541	37.0077
FBgn0053494	CG33494	-2.65176	3.29616e-17	73Iso_Up	21.7006	4.90972	8.6454	34.9721	38.275
FBgn0034997	CG3376	-1.00585	5.92439e-06	73Iso_Up	48.0969	40.8311	29.7096	65.9551	55.8917
FBgn0054054	CG34054	-1.81738	3.30556e-05	73Iso_Up	3.91076	1.77527	2.10164	7.20355	4.56259
FBgn0083956	CG34120	-2.21587	1.97597e-35	73Iso_Up	72.952	32.1212	26.2705	119.478	113.938
FBgn0083974	CG34138	-2.75875	0.000699575	73Iso_Up	1.90597	0.19417	0.955293	2.20754	4.26686
FBgn0083985	CG34149	1.01253	0.0172822	73Grp_Up	4.16468	5.65866	6.01834	2.36245	2.61926
FBgn0085195	CG34166	-3.58462	7.21768e-42	73Iso_Up	108.171	14.3686	23.6435	197.129	197.543
FBgn0085237	CG34208	-2.0511	0.0103498	73Iso_Up	1.2924	0.388339	0.764234	1.35551	2.66151
FBgn0085244	CG34215	-2.20609	1.9356e-05	73Iso_Up	2.56901	0.804417	1.28965	3.87288	4.30911
FBgn0085246	CG34217	1.36977	0.0210438	73Grp_Up	3.89514	8.65442	3.05694	2.05262	1.81659
FBgn0085248	CG34219	1.06293	0.00227888	73Grp_Up	8.55941	13.8138	10.4605	4.26016	5.70323
FBgn0085320	CG34291	-2.15763	7.36732e-07	73Iso_Up	3.90121	1.24823	2.00611	6.35152	5.99896
FBgn0085356	CG34327	1.11851	0.0196688	73Grp_Up	15.0136	19.306	23.5002	12.8967	4.35136
FBgn0085360	CG34331	-1.98154	2.82924e-13	73Iso_Up	20.3828	7.62809	10.8903	32.7645	30.2483
FBgn0085405	CG34376	-1.18918	5.91473e-08	73Iso_Up	46.2219	36.5594	25.9362	62.7406	59.6516
FBgn0038250	CG3505	-1.39656	4.4949e-08	73Iso_Up	12.9408	8.40477	7.45128	17.2343	18.6728
FBgn0038463	CG3534	-1.09944	2.39189e-06	73Iso_Up	31.1786	21.636	22.2583	36.7149	44.105
FBgn0031417	CG3597	-2.39147	1.88353e-24	73Iso_Up	50.4747	20.9426	15.8101	72.0355	93.1106
FBgn0029648	CG3603	-1.25933	0.00379014	73Iso_Up	6.32601	2.99576	5.25411	9.91456	7.1396
FBgn0031418	CG3609	-1.24544	1.55786e-07	73Iso_Up	62.4143	38.085	44.039	74.1269	93.4063
FBgn0032981	CG3635	-2.10989	0.0357728	73Iso_Up	0.646038	0.221908	0.334352	0.92949	1.0984
FBgn0035044	CG3663	-1.37362	0.000241555	73Iso_Up	7.04479	3.68922	5.06305	8.44287	10.984
FBgn0040349	CG3699	-2.67589	5.73281e-17	73Iso_Up	53.1921	13.4532	19.3447	66.4973	113.473
FBgn0040342	CG3706	2.20375	0.000447045	73Grp_Up	1.84764	2.69064	3.53458	0.658389	0.506954
FBgn0029863	CG3823	-1.5682	2.22782e-06	73Iso_Up	16.3983	6.82368	11.6068	23.0823	24.0803
FBgn0035091	CG3829	-1.53938	6.47583e-14	73Iso_Up	62.2277	41.0253	30.0917	95.1178	82.6758
FBgn0034804	CG3831	-1.30128	0.0230454	73Iso_Up	1.94761	1.16502	1.33741	2.71101	2.57702
FBgn0029866	CG3842	-1.80171	3.74136e-16	73Iso_Up	20.6226	10.3187	10.3172	30.1697	31.6846
FBgn0036824	CG3902	-1.28246	9.55593e-10	73Iso_Up	132.629	77.6678	93.4754	173.195	186.179
FBgn0038291	CG3984	-1.14262	0.0185578	73Iso_Up	4.49103	4.18852	2.00611	5.30584	6.46367
FBgn0037801	CG3999	-2.69855	6.85431e-10	73Iso_Up	12.3232	5.38127	2.05388	27.5362	14.3215
FBgn0038820	CG4000	-2.22454	1.27103e-11	73Iso_Up	59.3458	15.6723	31.0948	105.575	85.0416
FBgn0058006	CG40006	-3.05124	3.55993e-31	73Iso_Up	12.621	3.27315	2.91364	24.3991	19.898
FBgn0058160	CG40160	-1.08242	3.98353e-06	73Iso_Up	16.4137	11.983	11.2725	21.5719	20.8274
FBgn0058298	CG40298	-2.17102	6.15703e-05	73Iso_Up	3.38977	0.804417	2.00611	5.3833	5.36526
FBgn0069973	CG40485	-1.11808	4.64171e-08	73Iso_Up	118.442	75.0327	89.702	156.735	152.297
FBgn0036301	CG4069	1.24656	1.61815e-08	73Grp_Up	24.1881	37.7244	33.2919	12.4707	13.2653
FBgn0087011	CG41520	-1.30217	3.09937e-05	73Iso_Up	8.55058	5.9083	5.01529	13.4776	9.80111
FBgn0025628	CG4199	-2.13509	1.22281e-29	73Iso_Up	86.144	35.5053	36.3489	151.855	120.866
FBgn0259098	CG42246	-1.31232	0.00133858	73Iso_Up	4.05329	2.35777	2.81811	5.9255	5.11179
FBgn0259101	CG42249	-2.59787	4.95053e-05	73Iso_Up	1.91471	0.915371	0.286588	3.33067	3.12622
FBgn0259164	CG42269	-1.72784	0.00446257	73Iso_Up	1.76618	1.10954	0.716469	2.32373	2.91499
FBgn0259233	CG42331	-1.21185	0.00529349	73Iso_Up	3.98205	3.24541	2.05388	5.77059	4.85831
FBgn0259713	CG42367	1.32293	0.000385918	73Grp_Up	6.35946	8.26608	10.6515	3.0983	3.42194
FBgn0259715	CG42369	-3.1189	5.98894e-54	73Iso_Up	193.094	40.3595	50.4872	337.095	344.433
FBgn0259992	CG42489	-1.53283	0.000774756	73Iso_Up	2.9068	1.66431	1.67176	4.06652	4.22462
FBgn0034761	CG4250	-1.04236	6.27866e-06	73Iso_Up	58.9192	37.2806	47.4303	79.3165	71.6495
FBgn0260429	CG42524	1.58718	2.95997e-08	73Grp_Up	10.0102	16.0329	15.0936	4.18271	4.73157
FBgn0260658	CG42541	1.25301	1.30173e-10	73Grp_Up	331.284	564.728	410.012	175.751	174.646
FBgn0031389	CG4259	-3.57192	8.35426e-29	73Iso_Up	7.81415	1.52562	1.24188	13.7874	14.7017
FBgn0034741	CG4269	1.81404	0.000516929	73Grp_Up	3.63036	4.1053	7.54681	1.43296	1.43637
FBgn0261584	CG42694	-1.56897	0.000191829	73Iso_Up	3.39832	2.05265	1.76729	4.95728	4.81606
FBgn0261705	CG42741	-1.1084	0.0371916	73Iso_Up	2.46312	2.05265	1.38517	3.33067	3.08397
FBgn0261805	CG42751	-1.80664	0.00022569	73Iso_Up	3.61644	1.77527	1.81506	7.24228	3.63317
FBgn0261989	CG42807	-1.81279	0.00665032	73Iso_Up	1.90587	0.74894	1.14635	3.91161	1.81659
FBgn0262020	CG42831	2.16396	0.0209149	73Grp_Up	1.21695	3.13445	0.955293	0.271101	0.506954
FBgn0262035	CG42846	-2.61085	1.07341e-11	73Iso_Up	4.26204	1.30371	1.43294	7.55211	6.75939
FBgn0262353	CG43051	-3.06034	0.00545756	73Iso_Up	1.07829	0.0277385	0.525411	1.39424	2.36579
FBgn0036787	CG4306	-3.53413	2.46549e-33	73Iso_Up	11.5993	1.803	2.48376	21.4945	20.6161
FBgn0262366	CG43064	-1.9842	0.000729184	73Iso_Up	2.84454	0.74894	1.86282	3.95033	4.81606
FBgn0262481	CG43071	-3.12087	4.25246e-08	73Iso_Up	1.94317	0.443816	0.477646	3.6405	3.21071
FBgn0262537	CG43091	-1.98464	3.34291e-06	73Iso_Up	3.34311	1.47014	1.57623	4.91855	5.40751
FBgn0262538	CG43092	-1.54253	4.41329e-10	73Iso_Up	12.847	7.43392	7.21246	19.2095	17.5322
FBgn0262539	CG43093	-2.57764	9.35338e-13	73Iso_Up	4.96804	1.83074	1.38517	8.71397	7.94228
FBgn0262540	CG43094	-4.04107	0.00632024	73Iso_Up	0.395483	0.055477	0.0477646	0.92949	0.5492
FBgn0262563	CG43103	-1.79509	3.82623e-08	73Iso_Up	15.0029	5.79735	9.26634	20.4875	24.4605
FBgn0262570	CG43110	-1.70672	6.91305e-05	73Iso_Up	3.43296	2.10813	1.4807	5.07347	5.06954
FBgn0262574	CG43114	-3.08319	6.67104e-12	73Iso_Up	6.38979	0.887633	2.24494	11.2313	11.1952
FBgn0262685	CG43155	1.1019	0.0362693	73Grp_Up	2.60625	3.52279	3.9167	1.54915	1.43637
FBgn0026878	CG4325	-1.86968	5.43197e-05	73Iso_Up	3.2552	1.30371	1.86282	4.53127	5.32302
FBgn0036274	CG4328	1.35571	9.11937e-09	73Grp_Up	19.1911	31.289	26.175	9.37236	9.92785
FBgn0262983	CG43291	-2.54389	0.0420076	73Iso_Up	0.46602	0.0832156	0.238823	0.697118	0.844924
FBgn0030456	CG4332	-1.13177	0.000221338	73Iso_Up	7.64123	5.24258	5.34964	10.3406	9.63213
FBgn0038795	CG4335	-2.60576	3.36211e-17	73Iso_Up	9.43785	2.55194	3.53458	16.9632	14.7017
FBgn0263083	CG43351	-3.22487	1.29471e-11	73Iso_Up	4.22331	0.582509	1.33741	7.24228	7.73105
FBgn0263321	CG43402	-1.3158	0.0157396	73Iso_Up	5.77031	2.13587	5.15858	9.91456	5.87222
FBgn0263772	CG43689	1.01451	2.31433e-05	73Grp_Up	50.2755	84.7134	56.5056	30.4795	29.4033
FBgn0263997	CG43740	1.62089	2.4651e-19	73Grp_Up	106.189	180.162	151.892	44.9641	47.7382
FBgn0264489	CG43897	-1.0594	8.30724e-11	73Iso_Up	409.287	293.418	291.842	542.822	509.066
FBgn0264750	CG44008	-1.88838	4.26725e-09	73Iso_Up	8.96629	3.63375	4.96752	12.8579	14.4059
FBgn0264776	CG44014	-2.71876	1.30914e-21	73Iso_Up	9.23626	2.77385	2.77035	17.0794	14.3215
FBgn0039073	CG4408	-3.69669	7.35386e-15	73Iso_Up	9.88213	0.776678	2.53153	15.6464	20.5739
FBgn0265084	CG44195	-3.641	7.44908e-08	73Iso_Up	1.94237	0.527032	0.0955293	3.6405	3.50643
FBgn0265313	CG44286	-2.23441	0.00048067	73Iso_Up	1.61375	0.832156	0.429882	2.36245	2.83049
FBgn0265714	CG44521	4.88113	0.0250755	73Grp_Up	0.354858	0.998587	0.382117	0.0387288	0
FBgn0035982	CG4461	-1.69564	9.82874e-12	73Iso_Up	58.8611	25.4917	36.3489	92.4068	81.1972
FBgn0035969	CG4476	-3.0701	9.38917e-09	73Iso_Up	2.61169	0.443816	0.859763	4.91855	4.22462
FBgn0266000	CG44774	1.28613	2.69473e-14	73Grp_Up	156.32	230.701	231.181	85.242	78.1554
FBgn0266801	CG45263	1.09528	0.000199632	73Grp_Up	159.387	301.268	154.423	95.5051	86.3512
FBgn0038738	CG4572	-1.50973	1.90111e-15	73Iso_Up	52.911	29.6247	31.6202	78.1159	72.2832
FBgn0029924	CG4586	1.59961	0.0110545	73Grp_Up	2.55759	2.74611	5.20634	1.43296	0.844924
FBgn0032161	CG4594	-1.20254	0.0163215	73Iso_Up	2.98745	1.63657	2.38823	3.91161	4.01339
FBgn0032590	CG4631	4.47407	0.0120237	73Grp_Up	0.534828	1.77527	0.286588	0.0774575	0
FBgn0287592	CG46462	-1.99482	6.65256e-06	73Iso_Up	3.38808	1.88622	1.14635	5.57694	4.9428
FBgn0033820	CG4716	-2.34035	1.9296e-15	73Iso_Up	553.161	144.767	263.135	996.065	808.676
FBgn0034733	CG4752	-1.46737	4.55322e-10	73Iso_Up	18.8525	11.8721	10.4605	24.9413	28.136
FBgn0027584	CG4757	2.04186	2.90973e-05	73Grp_Up	3.29542	4.88198	6.01834	0.92949	1.35188
FBgn0031220	CG4822	-2.18105	3.03805e-25	73Iso_Up	42.9429	16.6431	18.2939	76.2957	60.5388
FBgn0034229	CG4847	-1.72434	3.38773e-24	73Iso_Up	180.597	91.6481	96.0069	270.482	264.25
FBgn0036587	CG4950	-1.30896	0.00413639	73Iso_Up	3.63477	1.88622	2.77035	5.15093	4.73157
FBgn0036597	CG4962	1.67581	0.000341854	73Grp_Up	6.7642	10.4297	10.8426	4.22144	1.56311
FBgn0031313	CG5080	1.31724	5.06918e-14	73Grp_Up	128.266	187.374	193.686	69.0147	62.9891
FBgn0039342	CG5107	-1.01116	1.16259e-06	73Iso_Up	27.0499	20.3046	19.2491	34.9333	33.7125
FBgn0030828	CG5162	-2.18524	8.13889e-18	73Iso_Up	43.5295	15.2284	20.2044	61.966	76.7191
FBgn0031907	CG5171	-2.3319	9.98424e-19	73Iso_Up	28.9742	8.98728	12.7532	44.3057	49.8505
FBgn0030575	CG5321	-1.81354	3.27265e-09	73Iso_Up	27.2047	10.3187	16.6699	37.2183	44.612
FBgn0034365	CG5335	-1.18083	7.47529e-05	73Iso_Up	9.15751	5.9083	6.49599	13.284	10.9418
FBgn0032213	CG5390	-1.37024	8.25694e-07	73Iso_Up	80.0579	38.1959	60.5656	109.602	111.868
FBgn0038353	CG5399	-3.09982	0.0271459	73Iso_Up	0.606667	0.19417	0.0955293	0.193644	1.94332
FBgn0034364	CG5493	-2.53855	2.61825e-14	73Iso_Up	31.7392	7.01784	13.995	57.3186	48.6254
FBgn0036764	CG5535	-1.15342	0.000551737	73Iso_Up	7.66292	4.85424	5.68399	9.25617	10.8573
FBgn0030603	CG5541	-1.16255	2.97824e-08	73Iso_Up	24.4695	17.4753	15.9534	33.2293	31.2199
FBgn0036759	CG5577	-1.5071	1.1427e-10	73Iso_Up	19.2067	10.6516	11.6546	26.7228	27.798
FBgn0039527	CG5639	-1.19428	0.000117841	73Iso_Up	8.83795	6.65724	5.25411	10.7666	12.6739
FBgn0039525	CG5646	-1.30797	4.41506e-08	73Iso_Up	37.2641	21.3032	26.2705	47.83	53.6526
FBgn0038846	CG5697	4.45972	3.8479e-07	73Grp_Up	1.82285	2.91254	4.10776	0.271101	0
FBgn0026593	CG5707	-1.41945	6.67104e-12	73Iso_Up	32.2441	18.7235	20.3	46.3971	43.5558
FBgn0034290	CG5773	-1.71866	2.14723e-14	73Iso_Up	85.4729	38.723	50.2484	122.422	130.498
FBgn0034717	CG5819	-2.79111	4.25078e-24	73Iso_Up	20.1692	4.77103	6.83034	38.5738	30.5017
FBgn0038897	CG5849	-3.05423	1.76092e-18	73Iso_Up	7.05154	1.52562	1.95835	14.3296	10.3926
FBgn0028523	CG5888	-1.10322	4.1978e-07	73Iso_Up	28.6419	19.1118	21.0642	38.1866	36.205
FBgn0036993	CG5910	-1.21876	2.4334e-07	73Iso_Up	35.377	23.1062	24.0734	41.9432	52.3853
FBgn0032494	CG5945	-2.22818	1.36251e-22	73Iso_Up	113.608	38.0295	51.9202	179.74	184.743
FBgn0036997	CG5955	-1.40645	7.1703e-07	73Iso_Up	46.795	26.2684	30.3783	82.4148	48.1184
FBgn0031913	CG5958	-1.83348	1.12964e-12	73Iso_Up	26.4271	11.2896	14.7115	36.8698	42.8376
FBgn0029831	CG5966	-2.84771	4.09652e-24	73Iso_Up	36.9175	9.01502	11.368	79.5489	47.7382
FBgn0031914	CG5973	-1.55406	1.57488e-17	73Iso_Up	71.7972	41.5246	39.7402	112.391	93.533
FBgn0038676	CG6026	-2.75753	2.67512e-06	73Iso_Up	2.41622	0.998587	0.382117	5.07347	3.21071
FBgn0029826	CG6041	1.03611	0.000510483	73Grp_Up	9.08329	13.8415	11.7501	5.46076	5.28077
FBgn0039488	CG6066	1.1618	1.98041e-05	73Grp_Up	12.1622	16.9205	18.1983	6.85499	6.6749
FBgn0029828	CG6067	-3.05185	4.18919e-56	73Iso_Up	38.3937	9.4311	9.4574	67.8528	66.8335
FBgn0027582	CG6230	-1.04261	8.32535e-07	73Iso_Up	30.3998	23.1617	20.6343	42.4855	35.3178
FBgn0037807	CG6293	-2.00801	8.44235e-17	73Iso_Up	15.111	7.21201	6.30493	25.6772	21.2498
FBgn0036731	CG6333	-1.80312	0.0410453	73Iso_Up	0.817153	0.388339	0.429882	1.39424	1.05615
FBgn0033875	CG6357	-1.15986	5.20745e-07	73Iso_Up	69.7128	41.4968	53.6397	90.8577	92.8571
FBgn0036106	CG6409	-1.34509	2.69973e-08	73Iso_Up	96.6413	50.7892	69.8319	144.613	121.331
FBgn0032287	CG6415	-2.41684	7.12614e-17	73Iso_Up	28.6538	8.07191	12.4188	42.3305	51.7938
FBgn0025827	CG6421	-1.1362	1.0136e-06	73Iso_Up	17.7867	12.2327	12.371	23.3922	23.1509
FBgn0028494	CG6424	-2.75916	8.73951e-06	73Iso_Up	1.84732	0.721201	0.334352	3.75669	2.57702
FBgn0034162	CG6426	-1.22541	5.96787e-07	73Iso_Up	68.13	38.0018	52.159	89.9669	92.3924
FBgn0034165	CG6435	-1.14634	5.69307e-05	73Iso_Up	9.27789	6.37986	6.40046	12.1221	12.2091
FBgn0037818	CG6465	-1.05213	0.0115468	73Iso_Up	6.51151	6.15795	3.20023	7.90067	8.78721
FBgn0030933	CG6470	1.59452	0.000319145	73Grp_Up	4.31467	5.49223	7.92893	1.93644	1.90108
FBgn0040606	CG6503	-2.76603	3.15663e-23	73Iso_Up	192.741	41.0807	70.5484	319.125	340.208
FBgn0035911	CG6638	-1.05034	0.00153665	73Iso_Up	9.54461	5.82509	7.88116	13.3614	11.1107
FBgn0032973	CG6675	-1.27474	0.0141091	73Iso_Up	2.5281	1.52562	1.76729	3.05957	3.75991
FBgn0037934	CG6830	-1.09094	0.00476767	73Iso_Up	5.32514	3.27315	4.25105	7.39719	6.37917
FBgn0037935	CG6834	-1.68098	7.88967e-11	73Iso_Up	22.1754	10.0413	13.5174	33.9651	31.1777
FBgn0030955	CG6891	2.77175	2.27135e-14	73Grp_Up	8.35877	18.3352	11.368	2.16881	1.56311
FBgn0037936	CG6908	-1.38942	1.0874e-10	73Iso_Up	35.1425	23.6332	19.488	54.5688	42.8799
FBgn0036262	CG6910	-1.6933	1.24021e-12	73Iso_Up	281.109	128.54	166.364	484.845	344.687
FBgn0035896	CG6983	-1.26147	7.57435e-14	73Iso_Up	173.372	123.02	103.506	238.918	228.045
FBgn0030085	CG6999	1.98112	1.32607e-08	73Grp_Up	8.09265	11.567	14.9981	2.59483	3.21071
FBgn0039238	CG7016	-1.01099	1.30844e-05	73Iso_Up	17.5959	13.5919	12.1322	23.1985	21.4611
FBgn0029722	CG7024	1.76747	0.000776981	73Grp_Up	2.85598	3.71696	5.3974	1.08441	1.22514
FBgn0038849	CG7079	-1.39067	5.26476e-05	73Iso_Up	6.70873	4.66007	3.58235	8.32668	10.2658
FBgn0030895	CG7135	-2.48321	5.34341e-19	73Iso_Up	34.0856	9.15371	14.2816	53.2133	59.6939
FBgn0031970	CG7227	-2.14289	2.99518e-08	73Iso_Up	4.66689	2.19134	1.67176	8.63651	6.16794
FBgn0032286	CG7300	-1.72863	0.00794161	73Iso_Up	1.56768	0.637986	1.00306	2.51737	2.11231
FBgn0030968	CG7322	-1.96416	2.66707e-11	73Iso_Up	25.0604	9.40336	13.6129	33.5004	43.7248
FBgn0036942	CG7328	-1.46747	0.00234191	73Iso_Up	2.97612	1.5811	1.95835	3.71796	4.64708
FBgn0037581	CG7352	1.73735	0.000274946	73Grp_Up	3.23282	4.49364	5.77952	1.43296	1.22514
FBgn0038098	CG7381	1.12529	6.08075e-05	73Grp_Up	16.4311	27.267	19.9179	8.44287	10.0968
FBgn0032262	CG7384	-2.44794	1.53678e-12	73Iso_Up	5.38347	2.05265	1.71953	8.63651	9.12517
FBgn0036765	CG7408	-1.0378	0.000703165	73Iso_Up	8.83125	6.62951	6.11387	12.7805	9.80111
FBgn0035817	CG7409	-1.9258	2.42059e-25	73Iso_Up	91.2521	40.4428	44.8988	141.437	138.23
FBgn0037144	CG7458	-1.91773	0.000353812	73Iso_Up	2.18247	0.915371	1.14635	3.79542	2.87274
FBgn0034432	CG7461	-1.40074	1.2941e-16	73Iso_Up	102.501	63.1606	61.9985	147.208	137.638
FBgn0035575	CG7509	-1.56819	0.00034182	73Iso_Up	3.25549	1.71979	1.95835	4.56999	4.77382
FBgn0036157	CG7560	-2.24642	1.45873e-17	73Iso_Up	11.7392	4.57686	4.68093	17.9701	19.729
FBgn0036698	CG7724	-2.01855	1.17446e-15	73Iso_Up	11.9144	5.6864	4.91976	19.0546	17.9969
FBgn0032025	CG7778	-1.42514	1.73063e-13	73Iso_Up	33.861	21.2477	19.6313	49.1081	45.4569
FBgn0037552	CG7800	-1.63311	8.30054e-10	73Iso_Up	10.7324	5.6864	6.01834	16.2274	14.9974
FBgn0030653	CG7860	1.72258	0.000381153	73Grp_Up	10.7228	9.76396	24.1211	5.49948	3.50643
FBgn0033048	CG7881	-1.37463	0.00593664	73Iso_Up	2.58494	1.66431	1.52847	4.10525	3.04172
FBgn0037548	CG7900	-2.00928	6.31918e-16	73Iso_Up	14.0187	6.01926	6.54375	23.276	20.2359
FBgn0038115	CG7966	-1.40187	1.10458e-06	73Iso_Up	17.9382	9.20919	12.7054	23.3922	26.4461
FBgn0035252	CG7970	-1.04072	0.000163172	73Iso_Up	11.5181	9.34788	7.26022	15.6077	13.8567
FBgn0034117	CG7997	-1.32318	3.15554e-11	73Iso_Up	36.2754	22.5514	23.4047	52.1676	46.9778
FBgn0033387	CG8008	-1.05666	0.000222241	73Iso_Up	11.2085	8.48799	7.54681	16.421	12.3781
FBgn0037607	CG8036	-2.32639	5.24128e-26	73Iso_Up	283.98	103.409	110.575	392.632	529.302
FBgn0031012	CG8051	-1.80468	4.27531e-09	73Iso_Up	7.18985	3.60601	3.58235	10.418	11.153
FBgn0037612	CG8112	-1.21003	0.000245063	73Iso_Up	44.2442	31.511	27.3214	79.7425	38.4018
FBgn0034010	CG8157	1.63127	0.000206997	73Grp_Up	9.78985	10.1523	20.3955	5.18965	3.42194
FBgn0030675	CG8191	-1.32228	0.0234699	73Iso_Up	2.58205	1.38693	1.91059	2.59483	4.43585
FBgn0037709	CG8199	-1.18137	7.12366e-06	73Iso_Up	11.2763	7.68357	7.59458	15.3366	14.4904
FBgn0034045	CG8249	-1.97588	5.14581e-13	73Iso_Up	9.28022	4.35495	4.10776	14.7169	13.9412
FBgn0034142	CG8306	-1.1476	2.56328e-09	73Iso_Up	39.3981	27.5998	26.6049	51.974	51.4136
FBgn0033913	CG8468	-1.53371	6.24221e-11	73Iso_Up	64.637	42.4677	31.4769	108.518	76.0854
FBgn0038126	CG8483	1.93529	0.00135367	73Grp_Up	3.60998	8.84859	2.96141	1.27805	1.35188
FBgn0035791	CG8539	-2.65227	1.8201e-19	73Iso_Up	30.4331	8.46025	10.6037	40.3554	62.3131
FBgn0033320	CG8586	-1.85091	1.1641e-17	73Iso_Up	79.0475	34.3403	42.5583	114.792	124.499
FBgn0040837	CG8620	1.4529	0.00293155	73Grp_Up	5.27058	5.85283	10.1739	2.0139	3.04172
FBgn0034479	CG8654	-2.07644	2.91839e-14	73Iso_Up	16.214	5.9083	8.11999	25.5223	25.3055
FBgn0032945	CG8665	-1.87754	1.49825e-14	73Iso_Up	18.6556	8.40477	9.55293	26.839	29.8258
FBgn0033321	CG8738	-1.31971	3.24233e-06	73Iso_Up	13.7998	7.60035	9.93504	18.8222	18.8418
FBgn0033702	CG8854	-1.41757	4.08362e-05	73Iso_Up	6.50668	3.46731	4.44211	8.90762	9.20967
FBgn0038466	CG8907	-1.54444	0.0279413	73Iso_Up	1.56713	0.610247	1.19412	2.0139	2.45028
FBgn0034493	CG8908	-1.91994	7.5797e-09	73Iso_Up	8.28882	4.85424	2.91364	12.1221	13.2653
FBgn0038405	CG8927	1.48778	0.0015543	73Grp_Up	5.87605	8.68216	9.26634	3.95033	1.60535
FBgn0030617	CG9095	-1.47521	0.00916651	73Iso_Up	2.84886	2.33004	1.00306	4.72491	3.33745
FBgn0035189	CG9119	-1.52807	1.03481e-10	73Iso_Up	42.3407	24.3822	24.36	52.0127	68.6078
FBgn0030629	CG9123	1.51942	5.82435e-12	73Grp_Up	33.7147	48.7366	54.9293	15.1817	16.0113
FBgn0031775	CG9150	-1.37604	4.8302e-06	73Iso_Up	10.964	6.18569	7.40352	13.7487	16.5183
FBgn0038181	CG9297	-1.83655	8.35426e-29	73Iso_Up	353.822	186.042	161.11	576.052	492.084
FBgn0030332	CG9360	-1.07227	7.69403e-07	73Iso_Up	123.678	79.3322	96.389	153.134	165.859
FBgn0036891	CG9372	-1.34572	1.97854e-11	73Iso_Up	30.4051	20.3878	17.7684	42.0207	41.4435
FBgn0037714	CG9396	-2.49814	1.89996e-25	73Iso_Up	18.385	5.79735	6.78258	30.2472	30.713
FBgn0033101	CG9436	-1.26795	7.66519e-07	73Iso_Up	40.3936	22.1353	30.3305	52.7098	56.3987
FBgn0036875	CG9449	-2.16403	8.0966e-21	73Iso_Up	23.9021	9.20919	10.5082	36.0952	39.7959
FBgn0036876	CG9451	-1.22126	2.30146e-06	73Iso_Up	25.3413	15.5336	18.055	39.3872	28.3894
FBgn0034618	CG9485	-1.05431	6.21631e-08	73Iso_Up	142.197	116.224	88.3168	179.082	185.165
FBgn0031800	CG9497	-2.21945	6.05121e-09	73Iso_Up	19.256	4.71555	10.556	34.0813	27.6712
FBgn0031801	CG9498	-2.66466	1.57739e-47	73Iso_Up	46.7961	14.5072	14.4727	81.4853	76.7191
FBgn0030593	CG9512	-1.26129	5.4322e-08	73Iso_Up	173.143	98.7769	126.815	216.378	250.604
FBgn0030589	CG9519	-1.96635	1.44426e-11	73Iso_Up	8.87066	4.24399	3.86894	15.414	11.9557
FBgn0030588	CG9521	-1.96718	9.20887e-09	73Iso_Up	5.84942	2.63516	2.72258	10.2244	7.81554
FBgn0031824	CG9547	-1.29539	1.80978e-05	73Iso_Up	14.8196	8.98728	9.98281	24.5928	15.7156
FBgn0038214	CG9616	-2.42526	0.000447045	73Iso_Up	1.28656	0.443816	0.477646	1.85898	2.36579
FBgn0027563	CG9631	-1.44707	3.83921e-10	73Iso_Up	18.8657	10.7903	11.7501	27.5749	25.3477
FBgn0038211	CG9649	-1.2616	5.1389e-09	73Iso_Up	33.527	20.8039	22.8793	49.1081	41.3168
FBgn0031516	CG9663	-1.12674	0.000504608	73Iso_Up	14.4458	12.9261	7.16469	19.4418	18.2503
FBgn0031515	CG9664	-1.25313	1.65099e-05	73Iso_Up	14.3496	8.32156	10.5082	17.699	20.8696
FBgn0030159	CG9689	-2.89488	1.51011e-41	73Iso_Up	25.9454	6.99011	7.0214	48.8757	40.8943
FBgn0030160	CG9691	-1.02282	5.29901e-06	73Iso_Up	186.971	117.639	153.324	244.65	232.269
FBgn0036659	CG9701	-1.87373	2.61134e-11	73Iso_Up	10.1881	4.77103	5.06305	14.4846	16.4338
FBgn0039754	CG9747	-1.0084	8.25067e-06	73Iso_Up	40.7588	34.0629	25.6018	57.2798	46.0906
FBgn0003060	CG9757	2.24806	0.00703784	73Grp_Up	1.28157	1.99717	2.34047	0.61966	0.168985
FBgn0034860	CG9812	-1.74467	2.8719e-16	73Iso_Up	97.4153	45.186	54.6427	161.15	128.682
FBgn0030740	CG9917	-1.22992	1.6102e-11	73Iso_Up	107.788	68.5141	74.0352	149.106	139.497
FBgn0032472	CG9928	-2.9517	7.66056e-05	73Iso_Up	41.4362	6.07474	15.2847	70.8349	73.5506
FBgn0036783	CheA75a	-3.03243	3.39611e-11	73Iso_Up	4.40114	1.0818	1.09859	10.1857	5.23853
FBgn0029948	CheA7a	-3.37768	1.54687e-11	73Iso_Up	3.33588	0.832156	0.477646	7.51338	4.52034
FBgn0067311	CheB38b	-4.12066	0.0345383	73Iso_Up	0.254156	0.055477	0	0.580931	0.380216
FBgn0032888	CheB38c	-2.93216	0.0236092	73Iso_Up	0.560481	0.277385	0	1.16186	0.802677
FBgn0038888	CheB93a	-6.5133	0.00266589	73Iso_Up	0.263169	0	0	0.503474	0.5492
FBgn0014141	cher	-1.01547	2.16143e-08	73Iso_Up	91.3563	73.0355	60.3745	120.95	111.065
FBgn0086758	chinmo	1.37506	1.19703e-08	73Grp_Up	353.105	658.901	403.993	167.192	182.335
FBgn0267435	chp	-1.69457	3.00144e-20	73Iso_Up	1316.68	802.669	591.756	2020.48	1851.82
FBgn0263005	Chpf	-1.02881	0.00397649	73Iso_Up	5.89238	4.90972	3.63011	7.55211	7.47757
FBgn0022702	Cht2	-1.54557	4.94969e-06	73Iso_Up	8.4793	6.01926	3.63011	11.425	12.8428
FBgn0038180	Cht5	3.46113	1.85584e-06	73Grp_Up	38.3476	95.5315	46.7616	7.59084	3.50643
FBgn0027567	Ciz1	1.24451	5.48239e-12	73Grp_Up	450.734	722.311	601.452	227.725	251.449
FBgn0000317	ck	-1.45866	1.88941e-09	73Iso_Up	22.8851	16.0606	11.1292	33.8489	30.5017
FBgn0052251	Claspin	-1.76137	0.0448918	73Iso_Up	1.038	0.804417	0.238823	1.58788	1.52086
FBgn0036756	Cln3	-1.55737	1.59659e-06	73Iso_Up	6.7671	3.60601	4.05999	10.573	8.82945
FBgn0000337	cn	-2.54058	0.00456636	73Iso_Up	0.987993	0.499293	0.143294	1.23932	2.07006
FBgn0263257	Cngl	1.07066	2.15074e-06	73Grp_Up	363.538	625.92	407.623	208.787	211.822
FBgn0035282	CNMa	-1.07065	0.00220116	73Iso_Up	5.72015	4.41042	3.72564	7.90067	6.84388
FBgn0264077	Cnx14D	-1.50635	0.0221928	73Iso_Up	2.66637	2.41325	0.668705	3.95033	3.63317
FBgn0015622	Cnx99A	-1.47569	1.67215e-17	73Iso_Up	439.032	262.767	254.968	588.561	649.831
FBgn0019830	colt	-1.42695	1.36313e-07	73Iso_Up	98.2592	46.6007	71.4559	130.71	144.271
FBgn0005775	Con	1.02766	9.96544e-10	73Grp_Up	296.464	419.212	414.406	175.015	177.223
FBgn0000357	Cp18	1.40912	0.00114326	73Grp_Up	4.19547	7.37845	5.30187	1.82025	2.28129
FBgn0261714	Cpn	-1.23985	1.68144e-11	73Iso_Up	576.527	424.316	338.221	737.473	806.099
FBgn0015623	Cpr	-1.32986	3.69947e-13	73Iso_Up	154.562	92.6466	102.264	221.993	201.345
FBgn0030398	Cpr11B	-1.45417	8.56219e-05	73Iso_Up	4.97451	2.69064	3.24799	7.24228	6.71714
FBgn0033602	Cpr47Ee	-1.82028	3.00591e-13	73Iso_Up	14.7716	8.34929	6.25717	22.3852	22.0948
FBgn0050042	Cpr49Ab	-2.5939	0.0391541	73Iso_Up	0.480107	0.249647	0.0477646	0.735846	0.88717
FBgn0033728	Cpr49Ae	-1.33029	6.69173e-11	73Iso_Up	35.1216	24.6595	19.7268	50.3474	45.7526
FBgn0033869	Cpr50Cb	2.27778	1.87491e-08	73Grp_Up	4.70983	7.68357	8.31105	1.70407	1.14065
FBgn0050163	Cpr60D	-1.82811	0.00426149	73Iso_Up	1.71225	0.610247	1.09859	2.47864	2.66151
FBgn0035510	Cpr64Aa	1.9561	0.0217217	73Grp_Up	1.20256	2.55194	1.38517	0.61966	0.253477
FBgn0039481	Cpr97Eb	1.52369	0.00167222	73Grp_Up	12.813	28.6539	10.8426	7.78448	3.97114
FBgn0035383	CPT2	-1.56115	1.13795e-10	73Iso_Up	19.4759	10.0136	11.9889	28.7367	27.1643
FBgn0029588	CR14798	1.55747	0.0116923	73Grp_Up	2.12509	2.99576	3.58235	0.697118	1.22514
FBgn0051427	CR31427	-3.38932	0.0198535	73Iso_Up	0.366937	0.055477	0.0955293	0.852033	0.464708
FBgn0085734	CR40450	3.83427	4.96265e-05	73Grp_Up	1.62636	4.99293	1.14635	0.154915	0.211231
FBgn0262565	CR43105	-2.34529	6.16512e-10	73Iso_Up	11.3132	2.74611	5.68399	18.7834	18.0391
FBgn0262815	CR43186	-2.72621	5.792e-06	73Iso_Up	2.31402	0.416078	1.00306	3.48559	4.35136
FBgn0000370	crc	-2.11467	1.95739e-38	73Iso_Up	151.439	66.406	61.5686	253.751	224.031
FBgn0039543	CROT	-1.32383	5.42032e-12	73Iso_Up	36.3449	23.6055	22.4494	51.5867	47.7382
FBgn0015924	crq	-1.3424	3.19946e-15	73Iso_Up	103.647	67.0717	63.0493	150.926	133.54
FBgn0013767	Crz	1.27522	2.4456e-06	73Grp_Up	49.7756	61.2466	85.4509	23.9731	28.4317
FBgn0062412	Ctr1B	-1.47456	0.000322706	73Iso_Up	4.66821	2.33004	3.20023	6.00296	7.1396
FBgn0265048	cv-d	-1.52968	2.12593e-16	73Iso_Up	53.5744	30.9284	30.5694	74.9402	77.8597
FBgn0031452	Cwc25	1.30579	1.89792e-09	73Grp_Up	24.9753	37.3638	36.731	12.6256	13.1808
FBgn0000404	CycA	-1.48075	0.0224459	73Iso_Up	1.75021	1.27597	0.764234	3.05957	1.90108
FBgn0000405	CycB	-4.24184	6.18387e-07	73Iso_Up	1.44716	0.221908	0.0955293	3.95033	1.52086
FBgn0038681	Cyp12a4	-1.36414	6.26379e-11	73Iso_Up	56.003	32.0657	37.3997	82.6859	71.8608
FBgn0038680	Cyp12a5	-1.40707	5.84399e-11	73Iso_Up	22.997	14.424	13.5652	34.4686	29.5301
FBgn0036806	Cyp12c1	-1.50539	6.90165e-06	73Iso_Up	8.67943	4.16078	5.92281	13.4389	11.1952
FBgn0050489	Cyp12d1-p	-1.53453	0.0229214	73Iso_Up	1.50037	1.0818	0.62094	2.43991	1.85883
FBgn0010383	Cyp18a1	-2.93082	6.35284e-24	73Iso_Up	14.4512	4.8265	2.77035	24.4378	25.7702
FBgn0038095	Cyp304a1	-3.21914	0.000292723	73Iso_Up	1.11056	0.249647	0.238823	2.98211	0.971662
FBgn0036910	Cyp305a1	-1.78864	1.30132e-14	73Iso_Up	26.8216	12.8984	14.1383	36.9472	43.3023
FBgn0031432	Cyp309a1	-2.58636	5.85107e-22	73Iso_Up	17.1884	4.68781	6.49599	28.9691	28.6007
FBgn0041337	Cyp309a2	-2.4767	2.34594e-16	73Iso_Up	7.36751	2.69064	2.38823	12.8579	11.5332
FBgn0030367	Cyp311a1	-1.52778	2.01227e-08	73Iso_Up	16.739	8.65442	10.6037	21.843	25.8547
FBgn0038236	Cyp313a1	-2.85674	8.98541e-62	73Iso_Up	106.389	31.1226	27.608	198.136	168.689
FBgn0033982	Cyp317a1	-1.22444	0.000955099	73Iso_Up	5.44452	4.29947	2.91364	7.55211	7.01287
FBgn0031693	Cyp4ac1	-2.31271	7.07279e-13	73Iso_Up	14.1235	3.99435	6.73481	22.6563	23.1087
FBgn0031694	Cyp4ac2	-2.94329	5.92613e-12	73Iso_Up	4.51458	0.887633	1.52847	7.31974	8.3225
FBgn0035344	Cyp4d20	-2.43489	8.92957e-26	73Iso_Up	17.4537	6.01926	6.3527	28.5044	28.9386
FBgn0031925	Cyp4d21	-3.22173	1.12663e-53	73Iso_Up	27.8898	6.54629	5.77952	53.0584	46.1751
FBgn0015033	Cyp4d8	-2.03104	1.16822e-06	73Iso_Up	3.86753	2.10813	1.28965	6.15787	5.91447
FBgn0015034	Cyp4e1	-1.41512	0.000697235	73Iso_Up	4.32684	3.27315	1.95835	6.11914	5.95671
FBgn0014469	Cyp4e2	-1.8209	8.69347e-22	73Iso_Up	37.4316	19.0564	17.9595	59.5648	53.1457
FBgn0015037	Cyp4p1	-1.12133	3.26818e-08	73Iso_Up	99.8443	64.5753	73.9874	141.554	119.261
FBgn0033395	Cyp4p2	-1.59082	8.69647e-05	73Iso_Up	3.97402	2.35777	2.05388	6.58389	4.90056
FBgn0033397	Cyp4p3	-1.58036	1.35902e-07	73Iso_Up	8.33915	4.68781	4.63317	13.5163	10.5193
FBgn0033302	Cyp6a14	-2.78423	3.58257e-08	73Iso_Up	4.74003	0.776678	2.00611	7.00991	9.16742
FBgn0000473	Cyp6a2	-1.3205	1.25887e-08	73Iso_Up	25.2926	14.8678	17.1953	37.2958	31.8114
FBgn0288232	Cyp6a21	-1.96224	1.66592e-08	73Iso_Up	5.22554	2.63516	2.14941	8.59779	7.51982
FBgn0013773	Cyp6a22	-1.85279	4.89365e-11	73Iso_Up	8.69184	4.43816	4.01223	13.9811	12.3359
FBgn0033978	Cyp6a23	-1.25103	2.2491e-06	73Iso_Up	14.3509	8.59894	10.2216	20.3326	18.2503
FBgn0013772	Cyp6a8	-1.42446	0.0105675	73Iso_Up	2.17125	1.60883	1.00306	2.90466	3.16846
FBgn0034756	Cyp6d2	-1.81472	5.01641e-07	73Iso_Up	5.1361	2.3023	2.81811	7.86194	7.56207
FBgn0039006	Cyp6d4	-1.30779	0.00124027	73Iso_Up	5.69477	4.68781	2.57929	7.35846	8.15351
FBgn0038194	Cyp6d5	-1.96373	3.69079e-30	73Iso_Up	138.267	61.5795	65.1032	221.025	205.359
FBgn0025454	Cyp6g1	-2.31511	1.72128e-46	73Iso_Up	1463.83	546.976	558.082	2542.16	2208.12
FBgn0033696	Cyp6g2	-1.9612	5.34341e-19	73Iso_Up	19.0626	8.9318	8.59763	29.3177	29.4033
FBgn0031182	Cyp6t1	-2.42861	1.53678e-12	73Iso_Up	6.26288	1.9417	2.53153	11.1152	9.46314
FBgn0033697	Cyp6t3	-3.00395	2.81668e-24	73Iso_Up	12.8912	4.02209	2.436	25.2512	19.8557
FBgn0031126	Cyp6v1	-1.39776	5.71367e-07	73Iso_Up	21.5202	15.1175	11.3202	25.2124	34.4306
FBgn0033065	Cyp6w1	-2.16351	3.91797e-33	73Iso_Up	103.663	45.6576	39.5969	181.832	147.566
FBgn0015039	Cyp9b2	-2.44851	2.67917e-19	73Iso_Up	28.8529	8.07191	12.18	45.8161	49.3435
FBgn0015040	Cyp9c1	-1.11399	1.95237e-06	73Iso_Up	24.8163	17.4198	17.2908	29.7437	34.8109
FBgn0033775	Cyp9h1	-1.09115	9.10411e-05	73Iso_Up	29.2061	16.8095	24.2644	39.9681	35.7825
FBgn0038511	cysu	1.84254	0.0465022	73Grp_Up	0.922172	1.63657	1.33741	0.503474	0.211231
FBgn0000406	Cyt-b5-r	-2.8058	3.91149e-41	73Iso_Up	246.761	61.8846	77.8563	468.269	379.033
FBgn0023507	D2hgdh	-1.48754	1.16496e-17	73Iso_Up	125.712	71.8982	75.1338	185.859	169.956
FBgn0033543	Daao1	-1.13913	1.94436e-08	73Iso_Up	44.9707	29.5415	32.4799	61.4625	56.3987
FBgn0031860	Daao2	-2.63657	3.03805e-25	73Iso_Up	14.0606	4.16078	4.7287	23.3147	24.0381
FBgn0039286	dan	1.0611	0.00013808	73Grp_Up	14.8808	19.7776	22.3538	8.05558	9.33641
FBgn0039283	danr	1.12638	2.06344e-05	73Grp_Up	17.3028	23.023	26.5571	10.8441	8.78721
FBgn0010316	dap	-1.02016	0.000858334	73Iso_Up	8.71572	6.65724	6.01834	12.4707	9.71662
FBgn0262636	dati	1.1003	1.26639e-06	73Grp_Up	134.028	230.396	152.608	81.7951	71.3116
FBgn0031461	daw	-1.34205	2.13267e-06	73Iso_Up	27.3587	13.7583	20.5388	37.412	37.7258
FBgn0030612	Dbct	-1.12432	3.8777e-05	73Iso_Up	10.426	7.85	6.63928	13.8649	13.3498
FBgn0261723	Dbx	1.18894	8.47317e-05	73Grp_Up	8.75792	13.3977	12.0367	4.56999	5.0273
FBgn0010385	Def	-1.47654	0.0062399	73Iso_Up	3.96961	2.1636	2.48376	7.97813	3.25296
FBgn0033735	Dera	-1.46289	5.07093e-08	73Iso_Up	12.9774	6.99011	8.40657	18.9384	17.5744
FBgn0086687	Desat1	-2.39782	2.82257e-28	73Iso_Up	1368.51	421.515	559.801	2462.49	2030.22
FBgn0032048	Dh31	1.27938	1.89177e-14	73Grp_Up	139.842	216.527	196.456	73.4685	72.9169
FBgn0287844	Dhc1	-1.3426	0.0347274	73Iso_Up	1.73201	1.16502	1.00306	2.94339	1.81659
FBgn0011761	dhd	-9.52181	0.000395476	73Iso_Up	2.15998	0	0	7.20355	1.43637
FBgn0028743	Dhit	1.3493	6.02775e-13	73Grp_Up	266.625	455.827	342.138	135.163	133.371
FBgn0033885	DJ-1alpha	1.60366	1.22546e-07	73Grp_Up	8.35335	12.7042	13.3263	3.83415	3.54868
FBgn0040467	Dlip1	1.31367	0.00184506	73Grp_Up	4.88105	6.18569	8.31105	2.32373	2.70376
FBgn0040465	Dlip3	1.20949	1.86246e-09	73Grp_Up	39.0987	55.7267	58.1773	21.9592	20.5316
FBgn0041604	dlp	-1.16785	8.15644e-09	73Iso_Up	34.6724	25.9355	21.3508	46.2421	45.1612
FBgn0010497	dmGlut	-1.6974	0.00091199	73Iso_Up	5.30761	3.7447	1.81506	10.7279	4.9428
FBgn0000477	DNaseII	-1.68168	2.54568e-15	73Iso_Up	39.1521	19.417	22.2106	55.9631	59.0179
FBgn0000479	dnc	1.14521	1.50843e-12	73Grp_Up	812.946	1261.24	1080.44	461.492	448.612
FBgn0030607	dob	-3.93711	2.78472e-37	73Iso_Up	19.6906	2.05265	3.58235	34.4299	38.6975
FBgn0027835	Dp1	-1.41804	1.10983e-15	73Iso_Up	176.414	119.608	94.4784	254.061	237.508
FBgn0040726	dpr1	1.11274	6.11329e-11	73Grp_Up	124.457	188.455	167.702	71.4158	70.2554
FBgn0051361	dpr17	1.02311	5.62103e-06	73Grp_Up	68.885	114.671	79.0982	42.9889	38.782
FBgn0037908	dpr5	1.10924	2.39629e-08	73Grp_Up	40.0827	61.1912	53.4486	22.5401	23.1509
FBgn0283461	Drs	1.6135	0.00390206	73Grp_Up	6.57972	5.74187	14.7115	3.79542	2.07006
FBgn0052282	Drsl4	-2.87218	1.82232e-16	73Iso_Up	8.49932	1.74753	2.96141	14.7557	14.5327
FBgn0035434	Drsl5	-2.44386	1.29206e-08	73Iso_Up	14.6146	2.77385	7.45128	26.1806	22.0525
FBgn0284247	ds	-1.44433	4.18656e-05	73Iso_Up	8.81093	6.79594	3.72564	13.4002	11.322
FBgn0035290	dsb	-1.74793	2.47069e-09	73Iso_Up	13.0057	6.62951	6.78258	16.3048	22.306
FBgn0000500	Dsk	1.5651	1.39164e-08	73Grp_Up	113.729	136.779	214.989	49.0306	54.1174
FBgn0040653	Dso1	-2.25235	2.39377e-13	73Iso_Up	86.4545	23.8274	43.227	158.827	119.937
FBgn0067905	Dso2	-1.89268	4.00231e-05	73Iso_Up	10.6644	2.74611	7.35575	17.854	14.7017
FBgn0000504	dsx	-1.01128	6.56589e-06	73Iso_Up	33.4731	27.9327	21.0164	45.7387	39.2045
FBgn0083973	dunk	1.42877	0.0050879	73Grp_Up	2.67728	3.91113	4.20329	1.20059	1.39412
FBgn0283531	Duox	-1.31299	0.000246626	73Iso_Up	8.82745	7.26749	3.96446	13.0516	11.0263
FBgn0000524	dx	-1.22674	0.00294054	73Iso_Up	5.85432	5.02067	2.72258	8.83016	6.84388
FBgn0036152	Dyro	-1.12947	7.10767e-06	73Iso_Up	18.6006	14.3963	11.368	27.3038	21.3343
FBgn0000092	dyw	1.52741	0.000643216	73Grp_Up	10.5939	22.1908	10.4605	6.42897	3.2952
FBgn0243514	eater	-1.90891	0.0345383	73Iso_Up	1.04465	0.776678	0.191059	1.85898	1.35188
FBgn0011695	EbpIII	-1.13932	6.45621e-08	73Iso_Up	808.053	490.5	620.51	1111.48	1009.73
FBgn0069242	eca	1.19677	4.05609e-07	73Grp_Up	20.074	31.8438	26.5571	10.573	11.322
FBgn0033879	Echs1	-1.01172	4.88041e-07	73Iso_Up	70.5838	48.3482	54.6905	90.664	88.6325
FBgn0260746	Ect3	-1.49562	5.38445e-11	73Iso_Up	50.3458	35.3666	23.5002	74.2043	68.3121
FBgn0284245	eEF1alpha1	-2.58303	3.36147e-48	73Iso_Up	4170.69	1284.74	1419.66	6756.97	7221.39
FBgn0028737	eEF1beta	-1.40242	3.45945e-11	73Iso_Up	252.474	139.081	168.657	330.434	371.724
FBgn0029176	eEF1gamma	-1.61568	1.41824e-24	73Iso_Up	743.994	418.186	399.79	1072.4	1085.6
FBgn0000559	eEF2	-1.32439	9.1755e-17	73Iso_Up	2725.21	1851.93	1606.09	3722.42	3720.41
FBgn0285952	eEF5	-1.51021	3.232e-11	73Iso_Up	399.673	199.052	262.61	535.193	601.839
FBgn0003731	Egfr	-1.95921	2.69762e-24	73Iso_Up	61.8053	32.0657	24.8854	94.0334	96.2368
FBgn0034885	Eglp4	-2.26188	1.62056e-24	73Iso_Up	133.99	45.1306	59.0848	206.657	225.088
FBgn0000564	Eh	2.17778	0.0147622	73Grp_Up	1.45771	2.02491	2.86588	0.813304	0.126739
FBgn0037135	eIF2A	-1.17596	1.67278e-12	73Iso_Up	317.576	215.584	215.514	417.883	421.321
FBgn0034237	eIF3b	-1.00017	5.69661e-07	73Iso_Up	218.244	186.597	134.935	281.364	270.08
FBgn0035823	eIF4E5	1.1998	0.00326705	73Grp_Up	5.44186	9.4311	6.40046	3.48559	2.45028
FBgn0053100	eIF4EHP	1.01809	3.85887e-09	73Grp_Up	453.658	704.225	569.88	279.234	261.293
FBgn0039916	Ekar	-1.07198	1.82132e-09	73Iso_Up	64.0866	47.2664	43.9435	84.6998	80.4367
FBgn0013949	Elal	-2.30284	1.54427e-23	73Iso_Up	51.8928	17.1147	22.4016	80.9431	87.1116
FBgn0010435	emp	-1.77145	1.14839e-24	73Iso_Up	117.634	64.9913	54.4517	186.673	164.422
FBgn0031250	Ent1	-1.23266	9.53877e-07	73Iso_Up	19.9864	15.3394	11.0814	29.3177	24.2071
FBgn0263916	Ent2	-1.18762	7.77971e-06	73Iso_Up	11.2099	8.15512	6.97364	15.6851	14.0257
FBgn0013953	Esp	-1.32358	0.000753139	73Iso_Up	5.78502	4.43816	2.86588	9.37236	6.46367
FBgn0000592	Est-6	-3.16228	3.07583e-44	73Iso_Up	112.234	22.4405	29.0887	182.374	215.033
FBgn0037090	Est-Q	-2.65324	2.98547e-23	73Iso_Up	14.2281	5.21484	3.63011	22.8887	25.1787
FBgn0031055	et	-1.7176	5.2203e-09	73Iso_Up	7.83463	4.35495	3.82117	11.5024	11.6599
FBgn0286783	Etf-QO	-1.08592	1.08971e-08	73Iso_Up	55.2991	38.2792	39.8835	73.1586	69.8752
FBgn0004583	ex	-1.75385	6.46471e-08	73Iso_Up	11.9563	7.87774	4.34658	19.6742	15.9268
FBgn0041156	exex	1.29511	0.0476404	73Grp_Up	1.85289	3.3841	2.10164	1.12313	0.802677
FBgn0000615	exu	-3.23494	1.168e-07	73Iso_Up	1.76239	0.471555	0.286588	3.29194	2.99948
FBgn0031414	eys	-1.58444	2.98547e-23	73Iso_Up	429.34	257.497	222.106	646.693	591.066
FBgn0016013	Faa	-1.34401	7.54565e-08	73Iso_Up	17.345	10.0413	11.7501	23.5084	24.0803
FBgn0283427	FASN1	-2.48837	4.89721e-44	73Iso_Up	896.364	322.987	293.466	1366.35	1602.65
FBgn0026721	Fatp2	-1.33029	0.00283765	73Iso_Up	113.64	56.4201	44.7077	167.463	185.968
FBgn0265187	fat-spondin	-2.02677	1.98106e-26	73Iso_Up	3.12917	2.13587	1.81506	4.29889	4.26686
FBgn0011205	fbl	-1.01929	2.08694e-08	73Iso_Up	73.8185	53.8405	53.5919	99.378	88.4635
FBgn0032820	fbp	-1.91242	5.03562e-18	73Iso_Up	72.6039	30.2627	38.1162	106.156	115.881
FBgn0000639	Fbp1	1.76318	0.0229085	73Grp_Up	1.37063	1.88622	2.48376	0.774575	0.337969
FBgn0000640	Fbp2	3.38474	0.000835332	73Grp_Up	0.913938	1.27597	2.10164	0.193644	0.0844924
FBgn0039937	fd102C	1.08199	0.000894386	73Grp_Up	8.21497	13.4809	9.88728	4.80237	4.68933
FBgn0011768	Fdh	-1.4152	1.68587e-06	73Iso_Up	68.8475	32.5373	50.7738	84.3512	107.728
FBgn0030090	fend	1.31505	6.39647e-08	73Grp_Up	67.0275	122.466	77.0443	34.9721	33.628
FBgn0037475	Fer1	1.11184	6.73995e-09	73Grp_Up	44.6358	64.3534	63.2881	26.1032	24.7985
FBgn0038914	fit	-9.261	1.7852e-31	73Iso_Up	117.103	0.332862	0.573176	146.395	321.113
FBgn0010470	Fkbp14	-1.12088	1.00018e-08	73Iso_Up	43.0527	30.2627	29.7096	54.9948	57.2436
FBgn0034943	Fmo-1	-1.16055	1.40167e-06	73Iso_Up	14.8388	10.4574	9.83951	19.7517	19.3065
FBgn0033079	Fmo-2	-2.50365	9.50014e-20	73Iso_Up	17.9118	6.49081	5.73176	24.8251	34.5996
FBgn0000715	FMRFa	1.32546	4.28327e-09	73Grp_Up	37.394	51.3163	59.9446	18.6285	19.6867
FBgn0086675	fne	1.4679	1.00014e-18	73Grp_Up	959.95	1531.83	1397.78	438.293	471.89
FBgn0032773	fon	-2.06576	8.50483e-24	73Iso_Up	142.513	55.1719	68.0646	241.203	205.612
FBgn0000721	for	-1.47908	9.15372e-15	73Iso_Up	81.958	54.3398	42.1284	123.467	107.897
FBgn0038197	foxo	-1.62407	3.51162e-18	73Iso_Up	63.5535	38.5843	30.9992	97.519	87.1116
FBgn0035612	frm	1.67843	0.00212676	73Grp_Up	5.0632	11.8443	4.15552	2.0139	2.23905
FBgn0029769	frma	-2.95448	8.57006e-28	73Iso_Up	23.4038	4.99293	7.26022	38.6513	42.7109
FBgn0030897	Frq1	1.17683	6.36239e-10	73Grp_Up	453.898	757.539	558.607	260.373	239.071
FBgn0023441	fus	-1.26519	5.1389e-09	73Iso_Up	47.9673	36.5039	26.0795	67.7753	61.5104
FBgn0031702	fusl	-1.65595	1.60432e-13	73Iso_Up	18.2625	10.3187	9.36187	26.3743	26.9953
FBgn0001083	fw	-1.34299	1.2115e-06	73Iso_Up	18.2298	14.008	8.93199	24.1667	25.8124
FBgn0035147	Gale	-1.07104	2.65998e-06	73Iso_Up	100.612	63.3825	79.6236	123.661	135.779
FBgn0263199	Galk	-1.91668	2.41769e-25	73Iso_Up	43.6111	21.0813	19.9656	67.1557	66.242
FBgn0263200	Galt	-1.22566	1.37326e-08	73Iso_Up	67.0077	41.3304	47.5736	84.1576	94.9694
FBgn0000053	Gart	-2.53931	7.68415e-16	73Iso_Up	118.896	41.691	36.8743	274.548	122.472
FBgn0039915	Gat	-1.56004	7.29752e-16	73Iso_Up	51.4685	29.4583	28.611	81.5628	66.242
FBgn0051414	Gba1b	-1.35976	9.37365e-09	73Iso_Up	16.8195	10.1246	10.8426	23.6245	22.6862
FBgn0034200	Gbp2	-2.32873	1.21523e-18	73Iso_Up	60.5416	17.6972	27.5124	105.536	91.4207
FBgn0039031	Gbp3	-2.15495	5.40627e-14	73Iso_Up	32.2961	10.2355	16.431	49.4566	53.0612
FBgn0036428	Gbs-70E	-2.29504	3.85848e-37	73Iso_Up	123.799	48.8198	46.0929	188.377	211.907
FBgn0036862	Gbs-76A	-1.28322	1.56956e-12	73Iso_Up	73.9738	51.9265	43.6569	106.272	94.04
FBgn0019809	gcm2	2.14188	0.00941786	73Grp_Up	1.0456	1.63657	1.86282	0.387288	0.295723
FBgn0010225	Gel	-1.68341	1.14425e-23	73Iso_Up	335.258	173.227	182.127	517.842	467.834
FBgn0030013	GIIIspla2	-1.01654	0.000643216	73Iso_Up	31.5025	21.2477	24.4555	50.2699	30.037
FBgn0039099	GILT2	-1.11386	0.000117026	73Iso_Up	16.2125	9.59753	13.0397	20.8361	21.3766
FBgn0011770	Gip	-1.68699	1.95797e-12	73Iso_Up	33.7152	15.6723	20.0611	47.7138	51.4136
FBgn0035266	Gk2	-1.60152	2.89662e-10	73Iso_Up	50.659	26.1852	29.9962	61.54	84.9148
FBgn0033799	GLaz	-1.02422	5.29482e-06	73Iso_Up	20.1345	14.7569	14.5204	25.8708	25.39
FBgn0001112	Gld	-1.34323	8.41107e-09	73Iso_Up	17.2594	10.5961	11.0814	24.6315	22.7284
FBgn0038934	Gld2	1.6722	0.00111762	73Grp_Up	2.88124	5.49223	3.58235	1.39424	1.05615
FBgn0001987	Gli	-1.33468	2.09033e-08	73Iso_Up	15.0375	9.73622	9.21857	21.8043	19.391
FBgn0001114	Glt	-2.59809	1.23935e-53	73Iso_Up	199.25	67.8762	60.6133	322.262	346.25
FBgn0264000	GluRIB	1.13848	9.24817e-07	73Grp_Up	112.578	196.638	127.675	63.0504	62.9468
FBgn0046113	GluRIIC	-1.07509	0.0146705	73Iso_Up	3.91987	2.38551	3.20023	5.15093	4.9428
FBgn0028422	GluRIID	-1.04716	0.0179719	73Iso_Up	4.06433	3.55053	2.2927	4.87982	5.53425
FBgn0040322	GNBP2	-1.76395	3.2068e-15	73Iso_Up	19.0381	10.6516	8.74093	29.0466	27.7135
FBgn0040321	GNBP3	-2.01359	1.7226e-22	73Iso_Up	33.6458	15.9219	14.1861	49.3017	55.1735
FBgn0038074	Gnmt	-3.53746	1.67473e-67	73Iso_Up	74.3194	12.2882	14.7115	146.201	124.077
FBgn0027528	goe	-1.36707	1.91562e-11	73Iso_Up	44.4522	31.3723	23.8823	62.8181	59.7361
FBgn0013272	Gp150	-1.52089	1.22694e-21	73Iso_Up	307.655	185.682	168.705	462.305	413.928
FBgn0266580	Gp210	-1.06929	4.4733e-06	73Iso_Up	22.7622	18.3906	14.0428	30.9443	27.6712
FBgn0039562	Gp93	-1.03634	4.88149e-07	73Iso_Up	154.224	108.097	115.017	180.437	213.343
FBgn0035167	Gr61a	1.28697	0.00326705	73Grp_Up	3.55572	5.35353	5.15858	1.93644	1.77434
FBgn0032682	grnd	-1.01015	0.00596116	73Iso_Up	11.004	6.29664	9.74398	16.1886	11.7867
FBgn0010323	Gsc	1.15638	0.0234083	73Grp_Up	3.0125	4.77103	3.9167	2.05262	1.30963
FBgn0038029	GstD11	1.25893	0.00090356	73Grp_Up	6.40565	7.98869	10.8426	3.3694	3.42194
FBgn0063497	GstE3	-1.34713	3.64161e-09	73Iso_Up	29.714	17.0869	20.1567	40.0843	41.528
FBgn0063496	GstE4	-1.39377	0.0158759	73Iso_Up	2.56089	1.27597	1.86282	4.56999	2.53477
FBgn0063495	GstE5	-1.68949	5.4196e-05	73Iso_Up	5.79896	2.19134	3.96446	9.13999	7.90004
FBgn0063493	GstE7	-1.67062	2.61379e-05	73Iso_Up	6.21949	2.52421	4.15552	8.4816	9.71662
FBgn0063492	GstE8	-1.61877	0.000249067	73Iso_Up	3.23567	1.60883	1.95835	4.68618	4.68933
FBgn0063491	GstE9	-1.92046	2.5199e-13	73Iso_Up	69.4992	25.5472	39.3581	110.687	102.405
FBgn0037696	GstZ1	-1.55182	0.0376119	73Iso_Up	1.29211	0.527032	0.955293	1.74279	1.94332
FBgn0001150	gt	1.06631	0.000455228	73Grp_Up	11.5458	19.3337	13.4219	6.58389	6.84388
FBgn0032394	Hacd1	-1.18166	6.80056e-08	73Iso_Up	29.2083	18.6125	20.9209	39.6583	37.6413
FBgn0286508	Had1	-2.33787	1.94274e-18	73Iso_Up	119.72	46.0182	43.9435	147.44	241.479
FBgn0061356	Hao	-3.13177	1.35921e-28	73Iso_Up	39.6847	7.1288	11.4635	64.4834	75.6629
FBgn0086695	hd	1.48145	0.00159774	73Grp_Up	4.32064	5.21484	7.97669	2.40118	1.68985
FBgn0010113	hdc	1.02281	7.81827e-08	73Grp_Up	199.368	316.552	244.268	116.419	120.233
FBgn0001187	Hex-C	-1.98928	5.22049e-13	73Iso_Up	62.9071	21.636	35.0115	97.9838	96.9972
FBgn0014000	Hf	-2.54284	1.06375e-19	73Iso_Up	34.9259	9.0705	14.1383	54.1815	62.3131
FBgn0028577	hfp	1.06074	2.38805e-06	73Grp_Up	406.834	699.871	454.242	241.125	232.101
FBgn0040211	hgo	-2.8451	1.46718e-29	73Iso_Up	17.428	4.29947	5.44517	30.9443	29.0231
FBgn0031459	HINT1	-1.32091	8.86708e-07	73Iso_Up	75.3607	41.4136	54.2129	87.527	118.289
FBgn0286723	hll	-3.82047	0.0190102	73Iso_Up	7.6974	1.74753	0.573176	25.1737	3.2952
FBgn0031877	Hmgcl	-1.11369	0.0159218	73Iso_Up	4.64052	2.38551	4.10776	6.1966	5.87222
FBgn0029167	Hml	-1.83133	4.66342e-12	73Iso_Up	19.6458	11.8721	7.45128	31.2928	27.967
FBgn0001208	Hn	-2.67316	4.49224e-50	73Iso_Up	171.029	55.3383	49.8185	324.934	254.026
FBgn0004914	Hnf4	-1.21682	4.78704e-09	73Iso_Up	47.0871	35.9491	26.8915	63.7863	61.7217
FBgn0037933	Ho	1.25369	2.56417e-08	73Grp_Up	70.9538	95.2263	112.916	42.6791	32.9943
FBgn0036992	Hpd	-2.00518	1.23322e-34	73Iso_Up	191.604	85.3792	86.4062	305.454	289.175
FBgn0052207	hpRNA:CR32207	-1.1219	0.000491767	73Iso_Up	9.01264	5.43675	7.11693	12.0059	11.491
FBgn0062928	hpRNA:CR33940	-1.04672	0.00189479	73Iso_Up	23.6377	12.732	21.2075	28.0396	32.5718
FBgn0000448	Hr3	1.01184	1.69147e-06	73Grp_Up	46.2164	73.5348	56.1234	28.0009	27.2065
FBgn0264562	Hr4	2.17396	7.65418e-06	73Grp_Up	4.24282	9.09823	5.15858	1.74279	0.971662
FBgn0034012	Hr51	1.50601	6.66224e-08	73Grp_Up	10.952	18.7235	14.9026	5.1122	5.06954
FBgn0001225	Hsp26	-1.81541	3.52549e-11	73Iso_Up	20.3986	8.40477	11.8456	29.7437	31.6001
FBgn0013276	Hsp70Ab	-3.25077	4.85539e-17	73Iso_Up	4.65599	1.10954	0.907528	7.86194	8.74496
FBgn0028374	Hug	1.87115	5.50043e-28	73Grp_Up	192.649	304.181	319.354	74.398	72.6634
FBgn0261624	I-3	1.66635	0.026824	73Grp_Up	1.57735	3.43958	1.52847	0.580931	0.760431
FBgn0031294	IA-2	1.12998	7.68169e-10	73Grp_Up	8706.24	14292.1	10727.7	5027.3	4777.87
FBgn0020416	Idgf1	-2.14469	2.54568e-15	73Iso_Up	47.0516	15.589	23.3091	85.0096	64.2987
FBgn0020415	Idgf2	-2.12775	1.62281e-24	73Iso_Up	122.616	45.2415	57.3653	199.608	188.249
FBgn0026415	Idgf4	-1.59613	3.63099e-20	73Iso_Up	384.615	214.086	213.078	530.158	581.138
FBgn0064237	Idgf5	-2.55719	4.51585e-11	73Iso_Up	8.99061	2.02491	3.9167	17.3892	12.6316
FBgn0013763	Idgf6	-2.53897	2.94266e-44	73Iso_Up	284.877	89.2626	100.258	463.312	486.676
FBgn0001248	Idh	-1.3373	7.0861e-15	73Iso_Up	251.087	156.223	159.916	337.947	350.263
FBgn0263397	Ih	1.07608	2.10556e-07	73Grp_Up	1010.94	1704.14	1171.52	600.412	567.662
FBgn0027086	IleRS	-1.31522	5.9254e-13	73Iso_Up	50.4268	33.5359	30.6649	69.3632	68.1431
FBgn0044047	Ilp6	-1.44312	8.96349e-09	73Iso_Up	28.627	18.3629	15.8101	48.1011	32.2338
FBgn0031561	IM33	-2.42428	3.17046e-21	73Iso_Up	127.023	35.2834	54.4039	227.028	191.375
FBgn0001256	ImpL1	-1.39128	0.0375296	73Iso_Up	1.43337	0.94311	0.811999	2.24627	1.73209
FBgn0001257	ImpL2	-1.39466	1.34096e-05	73Iso_Up	7.73595	5.29806	4.15552	12.2383	9.25191
FBgn0085351	inaF-A	-7.39395	9.51148e-05	73Iso_Up	0.48497	0	0	0.968219	0.971662
FBgn0259918	inaF-B	-4.54639	3.49349e-76	73Iso_Up	36.2677	4.24399	2.53153	73.7008	64.5944
FBgn0085350	inaF-C	-3.06567	6.18207e-09	73Iso_Up	2.4803	0.637986	0.573176	3.6405	5.06954
FBgn0036816	Indy	-1.14492	7.82484e-10	73Iso_Up	79.5519	52.8419	56.6011	106.698	102.067
FBgn0027108	Inx2	-1.3222	1.00435e-13	73Iso_Up	101.468	62.8832	65.7241	140.43	136.835
FBgn0265274	Inx3	-1.10671	9.185e-09	73Iso_Up	55.3749	42.9115	34.7727	72.4615	71.3538
FBgn0283680	IP3K2	-1.24361	2.67156e-09	73Iso_Up	60.2738	43.9656	35.5846	74.9402	86.6047
FBgn0038465	Irc	-1.23079	1.34493e-10	73Iso_Up	93.9718	64.0482	60.1357	141.399	110.305
FBgn0031305	Iris	-3.96193	5.10656e-55	73Iso_Up	56.3531	6.43534	9.26634	95.815	113.896
FBgn0259682	Jabba	-1.56475	2.69973e-08	73Iso_Up	78.896	33.5636	54.786	120.563	106.672
FBgn0027654	jdp	1.07667	1.80923e-11	73Grp_Up	797.687	1187.93	1078.48	461.957	462.384
FBgn0086677	jeb	1.45497	1.57446e-12	73Grp_Up	441.943	800.589	546.332	218.701	202.148
FBgn0010052	Jhe	-1.76784	0.000398404	73Iso_Up	2.61123	1.63657	1.00306	3.83415	3.97114
FBgn0010053	Jheh1	-1.64326	2.14085e-16	73Iso_Up	46.5864	23.7442	26.7004	70.2927	65.6083
FBgn0034405	Jheh2	-1.48324	8.21909e-15	73Iso_Up	78.3314	43.2998	48.4811	115.296	106.249
FBgn0028425	JhI-21	-1.20821	2.13181e-09	73Iso_Up	31.663	22.0799	20.2522	45.1577	39.1622
FBgn0027339	jim	1.22161	1.54931e-08	73Grp_Up	655.534	1154.87	763.565	356.653	347.052
FBgn0034126	jtb	-1.83765	4.13464e-07	73Iso_Up	5.67405	2.38551	3.20023	9.2949	7.81554
FBgn0035144	Kah	1.18038	4.42498e-05	73Grp_Up	17.2597	30.5956	19.488	9.91456	9.04068
FBgn0030334	Karl	-1.23837	0.00396938	73Iso_Up	4.00561	2.33004	2.96141	6.04169	4.68933
FBgn0087013	Karybeta3	-1.29778	3.53828e-13	73Iso_Up	379.923	273.308	214.798	549.6	481.987
FBgn0063923	Kaz1-ORFB	-1.80342	1.20814e-13	73Iso_Up	18.4782	9.76396	8.6454	31.7189	23.7846
FBgn0015399	kek1	1.17053	2.33476e-06	73Grp_Up	254.076	461.735	275.077	141.05	138.441
FBgn0028369	kirre	1.07466	3.87196e-10	73Grp_Up	143.837	217.664	190.915	82.9957	83.7742
FBgn0001311	kkv	2.01196	0.000717583	73Grp_Up	6.45163	14.8678	6.40046	3.52432	1.01391
FBgn0266450	Kr-h1	-1.51589	5.02402e-05	73Iso_Up	12.1903	9.48657	4.5854	20.4101	14.2792
FBgn0041627	Ku80	1.37619	3.4617e-05	73Grp_Up	9.88756	12.7042	16.9564	5.53821	4.35136
FBgn0002121	l(2)gl	-1.09296	7.9734e-07	73Iso_Up	31.9997	21.4419	23.5957	45.2352	37.7258
FBgn0086451	l(2)k09022	-1.09411	0.000934899	73Iso_Up	11.3354	9.98587	6.01834	13.7487	15.5888
FBgn0261800	LanB1	-1.21242	3.01567e-07	73Iso_Up	28.2266	22.1353	15.619	37.2571	37.8948
FBgn0267348	LanB2	-1.0322	0.000657266	73Iso_Up	8.22042	6.07474	5.82728	11.3475	9.63213
FBgn0029994	Ldsdh1	-2.09204	3.88983e-32	73Iso_Up	99.8255	41.3859	43.9435	165.604	148.369
FBgn0040102	lectin-24Db	-1.45338	0.00492235	73Iso_Up	2.48975	1.803	1.14635	3.75669	3.25296
FBgn0284253	LeuRS	-1.44014	1.30687e-14	73Iso_Up	62.362	38.8339	36.0145	83.7703	90.8293
FBgn0025692	Lfg	-1.38942	0.00173041	73Iso_Up	3.11315	2.05265	1.76729	4.49254	4.14013
FBgn0032230	lft	-1.00081	3.14694e-05	73Iso_Up	19.339	15.7277	12.7054	23.702	25.221
FBgn0039354	Lgr3	1.14443	0.0038065	73Grp_Up	6.24489	10.929	7.06917	3.13703	3.8444
FBgn0026411	Lim1	1.30151	7.4371e-12	73Grp_Up	75.9241	123.797	101.452	38.1866	40.2606
FBgn0023496	Lip1	-2.93074	0.000128144	73Iso_Up	1.06076	0.277385	0.286588	1.82025	1.85883
FBgn0024740	Lip2	-3.41955	4.06435e-18	73Iso_Up	4.66438	0.887633	0.955293	7.90067	8.91394
FBgn0032264	Lip4	-1.59345	8.51485e-09	73Iso_Up	29.0981	13.5087	18.676	48.7208	35.4868
FBgn0033593	Listericin	1.25772	4.20845e-11	73Grp_Up	118.749	195.889	153.468	67.9302	57.7083
FBgn0028418	Lk	1.11238	0.00808267	73Grp_Up	13.3511	13.0926	25.0287	6.62262	8.66047
FBgn0017581	Lk6	-1.30155	1.90121e-16	73Iso_Up	1512.05	1032.01	906.955	2062.15	2047.08
FBgn0286198	LKRSDH	-1.09461	9.37258e-06	73Iso_Up	23.8025	17.3643	16.0967	35.979	25.7702
FBgn0032253	LManI	-2.30509	4.22987e-11	73Iso_Up	5.36086	2.24682	1.81506	9.566	7.81554
FBgn0027611	LManII	-1.67413	4.55286e-22	73Iso_Up	106.735	55.8099	57.9863	160.298	152.847
FBgn0262972	lncRNA:cherub	1.28331	0.000151674	73Grp_Up	8.41082	14.535	10.3172	5.07347	3.71766
FBgn0051044	lncRNA:CR31044	1.25996	0.0156549	73Grp_Up	2.79132	3.57827	4.63317	1.43296	1.52086
FBgn0051386	lncRNA:CR31386	3.38389	0.033289	73Grp_Up	0.54533	0.388339	1.624	0	0.168985
FBgn0051451	lncRNA:CR31451	1.6642	3.20519e-18	73Grp_Up	585.224	1060.17	782.862	241.435	256.434
FBgn0062961	lncRNA:CR33942	-2.39213	2.21357e-05	73Iso_Up	2.54171	0.582509	1.28965	4.49254	3.80216
FBgn0267910	lncRNA:CR34335	-1.00914	1.52313e-05	73Iso_Up	435.537	270.256	364.731	548.709	558.452
FBgn0259993	lncRNA:CR42491	-1.25184	0.000118423	73Iso_Up	8.44567	5.79735	5.30187	9.79838	12.8851
FBgn0262142	lncRNA:CR42868	-3.99559	3.06513e-06	73Iso_Up	1.06481	0.110954	0.191059	2.0139	1.94332
FBgn0262741	lncRNA:CR43126	1.00634	0.000643216	73Grp_Up	13.4069	22.3295	15.2369	8.28796	7.7733
FBgn0263019	lncRNA:CR43314	2.03494	6.25125e-10	73Grp_Up	7.27128	13.6751	10.3649	2.59483	2.45028
FBgn0286827	lncRNA:CR43334	1.484	6.61133e-05	73Grp_Up	11.861	24.3544	11.9889	5.69313	5.40751
FBgn0263336	lncRNA:CR43417	-2.6702	2.07301e-14	73Iso_Up	5.61761	1.88622	1.57623	8.86889	10.1391
FBgn0263838	lncRNA:CR43700	1.01285	0.0352444	73Grp_Up	3.8871	4.49364	6.40046	2.24627	2.40803
FBgn0264511	lncRNA:CR43910	1.69301	0.00765761	73Grp_Up	1.67814	2.91254	2.38823	0.735846	0.675939
FBgn0265310	lncRNA:CR44283	-1.45408	0.0421512	73Iso_Up	1.24861	0.859894	0.62094	1.78152	1.73209
FBgn0265530	lncRNA:CR44380	-1.62573	0.031122	73Iso_Up	1.21669	0.527032	0.811999	2.09135	1.43637
FBgn0265546	lncRNA:CR44396	2.76245	4.19028e-05	73Grp_Up	1.79412	4.07756	2.2927	0.426016	0.380216
FBgn0265856	lncRNA:CR44645	-2.26262	0.0362693	73Iso_Up	0.550972	0.19417	0.238823	0.968219	0.802677
FBgn0265938	lncRNA:CR44725	-1.70336	0.0452038	73Iso_Up	0.948099	0.471555	0.525411	1.78152	1.01391
FBgn0266052	lncRNA:CR44817	3.33039	0.00766598	73Grp_Up	0.642355	0.693463	1.67176	0.0774575	0.126739
FBgn0266355	lncRNA:CR45003	-1.36528	0.0185578	73Iso_Up	2.56664	1.10954	2.10164	3.25322	3.80216
FBgn0266587	lncRNA:CR45112	2.99815	4.37342e-05	73Grp_Up	1.44674	2.35777	2.86588	0.30983	0.253477
FBgn0266590	lncRNA:CR45115	-1.48107	0.000182015	73Iso_Up	4.45364	2.82933	2.38823	7.35846	5.23853
FBgn0266750	lncRNA:CR45223	1.20787	0.00240206	73Grp_Up	6.36512	11.4837	7.06917	3.95033	2.95723
FBgn0266851	lncRNA:CR45312	2.22316	6.76287e-08	73Grp_Up	6.20162	11.0677	9.88728	1.31678	2.53477
FBgn0267073	lncRNA:CR45517	-1.19709	0.0170041	73Iso_Up	2.89115	2.10813	1.76729	4.64745	3.04172
FBgn0267137	lncRNA:CR45577	-1.84597	0.0486909	73Iso_Up	0.855154	0.277385	0.573176	1.00695	1.56311
FBgn0267229	lncRNA:CR45669	1.1809	0.0154861	73Grp_Up	3.93499	5.3258	6.06611	2.8272	1.52086
FBgn0267240	lncRNA:CR45680	-1.77342	0.0142849	73Iso_Up	1.18956	0.721201	0.477646	1.74279	1.81659
FBgn0267304	lncRNA:CR45740	3.80665	1.65742e-09	73Grp_Up	2.41076	4.54912	4.53764	0.387288	0.168985
FBgn0267641	lncRNA:CR45979	3.40091	0.00643763	73Grp_Up	0.670025	1.85848	0.62094	0.116186	0.0844924
FBgn0267656	lncRNA:CR45994	2.84911	3.29479e-08	73Grp_Up	2.90943	4.85424	5.5407	0.735846	0.506954
FBgn0267665	lncRNA:CR46003	1.23	0.00371869	73Grp_Up	5.35031	9.73622	5.92281	3.29194	2.45028
FBgn0267666	lncRNA:CR46004	2.91958	1.05615e-07	73Grp_Up	3.91457	9.81944	4.25105	0.658389	0.929416
FBgn0267668	lncRNA:CR46006	1.34773	5.87981e-11	73Grp_Up	32.3646	47.8212	48.8632	17.3118	15.4621
FBgn0287612	lncRNA:CR46481	2.08714	0.000166525	73Grp_Up	2.31298	3.96661	3.72564	0.968219	0.591447
FBgn0267585	lncRNA:dntRL	-1.98031	0.00307008	73Iso_Up	1.75921	0.527032	1.09859	2.285	3.12622
FBgn0026197	lncRNA:noe	1.40122	2.50477e-19	73Grp_Up	5344.48	8489.9	7636.7	2628.52	2622.81
FBgn0019661	lncRNA:roX1	1.62609	1.48569e-19	73Grp_Up	2293.83	4064.19	3113.25	1072.83	925.065
FBgn0019660	lncRNA:roX2	1.46447	4.98262e-11	73Grp_Up	83.9613	129.317	126.337	47.83	32.3606
FBgn0267429	lovit	-1.57411	7.65432e-14	73Iso_Up	84.0482	41.9961	52.0634	124.9	117.233
FBgn0034660	Loxl2	-1.33182	6.53556e-06	73Iso_Up	9.32822	5.93604	5.82728	14.5233	11.0263
FBgn0039114	Lsd-1	-2.31115	9.24804e-39	73Iso_Up	66.3011	25.6304	24.6943	105.884	108.995
FBgn0030608	Lsd-2	-1.82796	2.05238e-25	73Iso_Up	219.946	121.134	96.2457	328.11	334.294
FBgn0002563	Lsp1beta	-5.04335	1.22935e-58	73Iso_Up	44.0284	2.21908	3.86894	70.8736	99.1518
FBgn0002565	Lsp2	-7.25071	5.29297e-10	73Iso_Up	174.403	1.41466	3.86894	153.521	538.808
FBgn0034140	Lst	-3.40431	2.3497e-53	73Iso_Up	67.2256	13.6196	12.8487	144.381	98.0534
FBgn0268063	ltl	-1.88343	5.59592e-27	73Iso_Up	94.6758	44.4371	46.0929	151.507	136.666
FBgn0040765	luna	1.12697	5.34261e-06	73Grp_Up	44.4421	77.2795	50.4394	24.7864	25.2632
FBgn0016034	mael	1.19733	0.00417465	73Grp_Up	4.65589	6.26891	7.26022	2.98211	2.11231
FBgn0036996	mag	-6.10984	0.0149151	73Iso_Up	2.32627	0.055477	0.0955293	8.98507	0.168985
FBgn0002570	Mal-A1	-1.58157	0.000282265	73Iso_Up	4.01301	2.57968	1.91059	4.80237	6.75939
FBgn0050360	Mal-A6	-1.49981	0.00452852	73Iso_Up	2.49083	1.74753	1.14635	3.0983	3.97114
FBgn0267033	mamo	1.21587	8.80239e-12	73Grp_Up	794.716	1290.87	1030.86	418.077	439.065
FBgn0002645	Map205	-1.11097	4.06821e-08	73Iso_Up	33.0273	24.826	21.3508	45.545	40.3873
FBgn0033451	Marc	-1.00237	0.000236414	73Iso_Up	10.9019	7.93322	8.07222	14.2522	13.3498
FBgn0015513	mbc	-1.05495	2.79734e-08	73Iso_Up	60.3171	47.738	38.8326	79.6263	75.0715
FBgn0027950	MBD-like	1.05503	6.52294e-07	73Grp_Up	31.2935	44.8532	43.6569	17.7378	18.9263
FBgn0035811	Mcad	-1.4766	2.7714e-12	73Iso_Up	143.151	74.4224	93.6664	202.706	201.81
FBgn0039877	Mccc1	-1.16123	3.23393e-05	73Iso_Up	12.3836	8.68216	8.21552	18.8222	13.8145
FBgn0042083	Mccc2	-1.04212	0.000121436	73Iso_Up	11.4985	9.04276	7.54681	14.4071	14.9974
FBgn0262782	Mdh1	-1.06106	8.32535e-07	73Iso_Up	358.725	227.678	284.104	448.44	474.678
FBgn0004513	Mdr65	-1.08228	1.74449e-08	73Iso_Up	63.9932	50.2899	40.5044	82.3761	82.8025
FBgn0004797	mdy	-1.92053	5.12242e-18	73Iso_Up	21.0644	9.51431	10.2694	33.8877	30.5862
FBgn0026206	mei-P26	1.22686	6.60024e-12	73Grp_Up	1457.26	2394.56	1871.61	771.206	791.651
FBgn0002719	Men	-1.0872	1.41712e-11	73Iso_Up	339.379	244.21	235.336	449.718	428.25
FBgn0037207	Mes2	-1.05645	2.71016e-05	73Iso_Up	13.1473	9.62527	9.21857	17.3118	16.4338
FBgn0030731	Mfe2	-1.2791	2.47358e-11	73Iso_Up	79.5294	49.5133	53.4009	105.11	110.094
FBgn0033234	MFS12	1.85596	0.0365529	73Grp_Up	1.01196	1.35919	1.91059	0.271101	0.506954
FBgn0010651	MFS14	-1.14088	1.99941e-08	73Iso_Up	38.8412	28.959	24.5988	55.4209	46.3863
FBgn0267977	mh	1.15545	0.0097795	73Grp_Up	3.56802	5.13163	5.15858	2.20754	1.77434
FBgn0027579	mino	-1.94526	2.37812e-30	73Iso_Up	114.639	54.8113	51.2992	189.926	162.521
FBgn0014863	Mlp84B	-1.76946	5.59786e-28	73Iso_Up	279.517	147.597	136.702	411.222	422.546
FBgn0259110	mmd	1.37635	9.33383e-17	73Grp_Up	863.16	1424.73	1169.56	435.544	422.8
FBgn0035410	MnM	-1.42115	1.78259e-08	73Iso_Up	16.0391	11.2341	8.16775	22.6176	22.137
FBgn0039581	Moca-cyp	1.13053	1.83996e-10	73Grp_Up	256.199	380.323	355.56	137.332	151.579
FBgn0051217	modSP	-1.8774	3.83322e-21	73Iso_Up	33.6724	16.976	15.3324	55.6145	46.7665
FBgn0025631	moody	-1.03181	6.98453e-06	73Iso_Up	37.6719	31.7329	22.8793	52.0127	44.0628
FBgn0027930	MP1	-1.12553	7.9734e-07	73Iso_Up	48.6984	30.0408	37.4952	64.0574	63.2003
FBgn0026409	Mpcp2	-1.08022	6.21217e-12	73Iso_Up	1161.63	867.162	780.617	1538.19	1460.53
FBgn0259985	Mppe	-1.71746	1.10864e-21	73Iso_Up	166.113	82.0505	90.9916	253.015	238.395
FBgn0263316	Mrp4	-1.11091	5.18057e-06	73Iso_Up	20.4906	16.5044	12.18	26.4517	26.8263
FBgn0011581	Ms	1.09545	4.35567e-06	73Grp_Up	306.48	367.23	504.968	174.512	179.208
FBgn0015766	Msr-110	-1.32401	2.22173e-16	73Iso_Up	782.927	507.088	483.951	1146.95	993.715
FBgn0013674	mt:CoI	-1.87251	4.73295e-10	73Iso_Up	4407.61	1470.72	2727.84	7233.33	6198.53
FBgn0013676	mt:CoIII	-1.87219	8.28141e-10	73Iso_Up	1847.68	613.16	1146.26	3093.69	2537.6
FBgn0013679	mt:ND1	-1.7328	3.13341e-07	73Iso_Up	251.101	82.4944	174.771	383.105	364.035
FBgn0013683	mt:ND4L	-1.99685	0.00808185	73Iso_Up	1.75696	0.360601	1.24188	3.05957	2.36579
FBgn0013684	mt:ND5	-2.02036	0.0170224	73Iso_Up	368.435	87.4318	236.053	563.116	587.137
FBgn0034215	Mtap	-1.02434	0.000102878	73Iso_Up	30.1146	19.0564	24.6943	35.9403	40.7676
FBgn0085453	Mthfs	-2.00259	1.47385e-12	73Iso_Up	25.6387	9.23693	13.804	37.1409	42.3729
FBgn0266369	Mtp	-1.88583	9.39129e-23	73Iso_Up	54.3398	25.4917	26.5094	79.9362	85.4218
FBgn0028479	Mtpalpha	-1.37822	7.42364e-12	73Iso_Up	153.648	87.0712	102.407	206.192	218.92
FBgn0025352	Mtpbeta	-1.02	8.74913e-07	73Iso_Up	114.152	75.6984	90.2274	145.272	145.411
FBgn0051439	Muc96D	4.83184	0.0242374	73Grp_Up	0.341361	0.610247	0.716469	0.0387288	0
FBgn0030999	Mur18B	4.91995	0.0213748	73Grp_Up	0.361388	0.499293	0.907528	0.0387288	0
FBgn0040299	Myo28B1	-1.05736	3.98353e-06	73Iso_Up	18.3326	13.9802	12.2755	24.5153	22.5595
FBgn0010246	Myo61F	-3.23373	7.52768e-19	73Iso_Up	5.81808	1.52562	1.00306	9.75965	10.984
FBgn0000036	nAChRalpha1	1.26329	3.00217e-09	73Grp_Up	292.808	516.103	347.249	157.316	150.565
FBgn0015519	nAChRalpha3	1.40995	1.92884e-12	73Grp_Up	175.812	309.201	222.631	84.8547	86.5624
FBgn0028875	nAChRalpha5	1.1757	6.89128e-09	73Grp_Up	338.359	572.8	408.722	182.567	189.347
FBgn0032151	nAChRalpha6	1.75994	7.45478e-21	73Grp_Up	823.45	1502.96	1126.15	320.984	343.715
FBgn0086778	nAChRalpha7	1.24693	7.1994e-11	73Grp_Up	431.533	731.603	536.588	230.823	227.115
FBgn0000038	nAChRbeta1	1.19334	1.47315e-07	73Grp_Up	713.681	1270.29	807.843	389.96	386.637
FBgn0034797	nahoda	-1.00781	1.51057e-07	73Iso_Up	59.641	42.3845	44.851	78.5807	72.7479
FBgn0026403	Ndg	-2.30699	7.57884e-18	73Iso_Up	10.5167	4.43816	3.53458	17.6603	16.4338
FBgn0002930	nec	-1.37406	6.72103e-13	73Iso_Up	116.543	67.1827	76.71	167.657	154.621
FBgn0029970	Nek2	2.36505	0.0368207	73Grp_Up	0.723679	0.998587	1.4807	0.0774575	0.337969
FBgn0030425	Nep6	-3.37987	4.36272e-51	73Iso_Up	54.1464	9.34788	12.4188	96.9768	97.8422
FBgn0039564	Nep7	-1.40183	9.77413e-05	73Iso_Up	9.70833	4.93746	6.87811	16.4985	10.5193
FBgn0033742	Nepl10	-1.19916	0.0096141	73Iso_Up	3.51637	2.94028	1.76729	4.87982	4.4781
FBgn0037230	Nepl11	-1.68759	3.67112e-21	73Iso_Up	123.019	72.4807	58.1773	179.082	182.335
FBgn0037727	Nepl12	-2.92925	9.08799e-18	73Iso_Up	8.38918	1.71979	2.77035	15.3366	13.73
FBgn0039022	Nepl13	-2.70963	2.70427e-15	73Iso_Up	8.7341	2.02491	3.29576	14.4071	15.2086
FBgn0039023	Nepl14	-2.30108	5.04314e-13	73Iso_Up	7.95375	3.68922	2.34047	13.3227	12.4626
FBgn0039024	Nepl15	-1.38971	9.46449e-12	73Iso_Up	57.3689	33.3417	37.1131	76.6829	82.3378
FBgn0039611	Nepl18	-2.83811	1.31241e-26	73Iso_Up	14.5452	4.8265	3.24799	26.9552	23.1509
FBgn0039612	Nepl19	-2.1908	1.17595e-10	73Iso_Up	5.86121	2.24682	2.53153	8.90762	9.75887
FBgn0027578	Nepl21	-2.47299	1.85378e-36	73Iso_Up	32.7795	11.3173	11.368	56.4278	52.005
FBgn0031678	Nepl3	-2.67836	0.00565294	73Iso_Up	0.770635	0.360601	0.0955293	1.31678	1.30963
FBgn0031805	Nepl4	-2.13128	3.12579e-13	73Iso_Up	10.7523	5.43675	3.53458	18.28	15.7578
FBgn0259716	Nepl6	-2.16713	4.07471e-16	73Iso_Up	10.1873	4.49364	3.86894	16.4597	15.9268
FBgn0032613	Nepl9	-2.77921	5.73248e-13	73Iso_Up	5.50192	1.30371	1.91059	10.7666	8.02677
FBgn0041105	nerfin-2	1.07198	0.00358753	73Grp_Up	5.53568	7.82226	7.88116	3.52432	2.91499
FBgn0263390	Nha2	-1.8334	1.79296e-16	73Iso_Up	21.6896	11.7334	9.60069	31.7963	33.628
FBgn0038079	NijC	1.63457	1.989e-05	73Grp_Up	6.75544	12.1217	9.02752	3.71796	2.15456
FBgn0028543	NimB2	-1.20423	2.18119e-06	73Iso_Up	89.2565	48.7088	70.4051	120.679	117.233
FBgn0054003	NimB3	-2.28137	0.000223223	73Iso_Up	1.64174	0.776678	0.477646	2.43991	2.87274
FBgn0028542	NimB4	-2.1325	4.15065e-16	73Iso_Up	10.5505	4.49364	4.34658	17.3505	16.0113
FBgn0028936	NimB5	-1.45149	9.76228e-05	73Iso_Up	8.68835	3.85565	6.49599	13.2065	11.1952
FBgn0259896	NimC1	-1.57326	2.56767e-05	73Iso_Up	5.46738	2.6629	3.48682	8.79143	6.92837
FBgn0002936	ninaA	-1.21016	3.47744e-06	73Iso_Up	175.663	97.0016	137.18	212.543	255.927
FBgn0002937	ninaB	-1.2243	7.76478e-10	73Iso_Up	90.0943	65.5184	54.4517	111.81	128.597
FBgn0002939	ninaD	-1.26421	5.75062e-05	73Iso_Up	9.29163	7.32297	4.77646	12.8579	12.2091
FBgn0037896	ninaG	-1.63752	6.31786e-14	73Iso_Up	42.6775	20.9426	25.4108	62.0435	62.3131
FBgn0011817	nmo	1.02333	2.90858e-06	73Grp_Up	264.679	446.119	298.816	161.654	152.128
FBgn0028473	Non1	-1.14108	9.1308e-11	73Iso_Up	359.134	239.356	254.968	501.925	440.29
FBgn0026196	nop5	-1.0262	3.08945e-06	73Iso_Up	23.5251	17.4753	16.7176	29.2789	30.6285
FBgn0039800	Npc2g	-2.06005	1.23978e-13	73Iso_Up	120.79	39.25	65.342	185.123	193.445
FBgn0039801	Npc2h	-1.6552	1.13095e-06	73Iso_Up	25.4921	9.59753	17.6729	42.2531	32.4451
FBgn0287423	Nplp2	-3.30029	1.3235e-05	73Iso_Up	969.467	113.7	289.454	1643.76	1830.95
FBgn0015776	nrv1	-1.36235	3.0056e-14	73Iso_Up	163.22	102.743	99.9714	248.948	201.219
FBgn0267326	Ntl	6.22712	0.00388734	73Grp_Up	0.322816	0.527032	0.764234	0	0
FBgn0031886	Nuf2	1.61779	0.0454259	73Grp_Up	1.11327	1.99717	1.4807	0.426016	0.5492
FBgn0022774	Oat	-1.35653	5.50478e-09	73Iso_Up	41.8711	22.9952	29.1842	57.0475	58.2575
FBgn0032123	Oatp30B	-1.05225	7.19992e-09	73Iso_Up	66.1697	48.4037	46.5227	90.1606	79.5918
FBgn0030985	Obp18a	-1.40468	9.32272e-07	73Iso_Up	31.2891	15.0065	22.9748	47.2104	39.9649
FBgn0034470	Obp56d	-1.95305	3.7749e-15	73Iso_Up	673.975	249.591	367.071	1162.33	916.911
FBgn0034471	Obp56e	-3.04697	2.30146e-06	73Iso_Up	371.478	56.6421	123.758	696.111	609.401
FBgn0043533	Obp56f	-2.2843	0.00395045	73Iso_Up	0.961106	0.360601	0.382117	1.66534	1.43637
FBgn0043535	Obp57a	-2.67566	5.61199e-23	73Iso_Up	10.2395	3.16219	3.15247	17.1956	17.4477
FBgn0043534	Obp57b	-2.13891	9.90797e-18	73Iso_Up	13.457	5.38127	5.87505	21.5332	21.0386
FBgn0046878	Obp83cd	-1.68951	0.00615308	73Iso_Up	1.65208	1.02633	0.716469	2.24627	2.61926
FBgn0046876	Obp83ef	-2.37029	2.17697e-09	73Iso_Up	5.4381	1.49788	2.53153	9.06253	8.66047
FBgn0011282	Obp84a	-1.94647	0.0298416	73Iso_Up	1.28879	0.249647	0.955293	2.5561	1.39412
FBgn0030103	Obp8a	-1.00328	0.0131096	73Iso_Up	12.056	6.01926	11.6068	15.6851	14.9129
FBgn0039678	Obp99a	-5.40575	3.24233e-06	73Iso_Up	86.6002	4.1053	5.25411	58.5966	278.445
FBgn0039685	Obp99b	-3.40407	9.5845e-26	73Iso_Up	76.3079	10.7903	19.0103	173.66	101.771
FBgn0039682	Obp99c	-1.69175	6.51046e-08	73Iso_Up	384.819	141.217	262.897	523.69	611.471
FBgn0031097	obst-A	1.01361	0.0192207	73Grp_Up	12.3731	24.5208	10.2694	7.90067	6.80164
FBgn0027600	obst-B	1.8439	1.7709e-06	73Grp_Up	7.08083	11.456	11.368	3.6405	1.85883
FBgn0038063	Octbeta2R	1.30252	1.02386e-12	73Grp_Up	241.287	396.661	319.498	120.098	128.893
FBgn0013307	Odc1	-3.45053	6.19759e-58	73Iso_Up	41.3152	7.18428	8.74093	74.4754	74.8602
FBgn0004646	ogre	-1.2534	2.84376e-11	73Iso_Up	73.8884	54.1456	42.7971	100.811	97.7999
FBgn0015522	olf186-M	-1.83335	1.00358e-13	73Iso_Up	30.3813	16.7541	13.0397	54.259	37.4724
FBgn0035382	Or63a	1.25466	0.000112889	73Grp_Up	7.46842	10.4852	11.4635	3.91161	4.01339
FBgn0034935	Orcokinin	1.72988	3.93023e-16	73Grp_Up	179.057	257.719	310.613	68.9372	78.9581
FBgn0037429	Osi19	1.81849	0.0432412	73Grp_Up	0.971838	1.16502	1.95835	0.426016	0.337969
FBgn0037410	Osi2	-1.12081	8.02021e-06	73Iso_Up	14.524	10.9845	9.21857	20.4875	17.4054
FBgn0053970	osy	-2.02253	7.43335e-21	73Iso_Up	30.2726	14.2021	12.6576	53.252	40.9788
FBgn0015524	otp	1.09956	5.63275e-05	73Grp_Up	15.2973	25.3253	18.3416	9.41109	8.11127
FBgn0259834	out	-1.32415	1.07506e-06	73Iso_Up	14.5268	8.18286	10.2216	21.0297	18.6728
FBgn0038516	P5cr-2	-2.70802	1.42998e-25	73Iso_Up	15.8551	4.27173	5.34964	26.2968	27.5023
FBgn0037146	P5CS	-2.49502	1.35921e-28	73Iso_Up	380.615	109.955	148.166	702.888	561.452
FBgn0020513	Paics	-2.27617	1.98489e-17	73Iso_Up	242.528	87.4595	98.4907	505.294	278.867
FBgn0026192	par-6	-1.39946	7.80939e-16	73Iso_Up	75.9187	48.5979	44.1823	111.152	99.7432
FBgn0285944	para	1.54752	1.35709e-12	73Grp_Up	1343.91	2533.08	1625.81	624.114	592.629
FBgn0036007	path	-1.92965	1.33071e-21	73Iso_Up	248.706	108.68	122.564	435.118	328.464
FBgn0027580	PCB	-1.55668	5.71222e-22	73Iso_Up	289.353	164.351	163.068	418.387	411.605
FBgn0259171	Pde9	1.19491	2.88406e-07	73Grp_Up	318.821	570.498	358.187	173.389	173.209
FBgn0023178	Pdf	1.32295	1.58367e-05	73Grp_Up	138.731	151.064	260.843	66.3811	76.6346
FBgn0286818	Pdi	-1.12246	1.43187e-08	73Iso_Up	330.168	217.803	241.355	404.328	457.188
FBgn0004394	pdm2	1.09798	0.00321819	73Grp_Up	7.34986	12.5378	8.45434	3.71796	4.68933
FBgn0031969	pes	-1.3269	1.22914e-11	73Iso_Up	42.0764	29.1254	24.1211	61.1527	53.9061
FBgn0035922	Pex7	1.33566	0.000551737	73Grp_Up	5.40563	8.48799	7.64234	2.32373	3.16846
FBgn0000052	Pfas	-1.87032	8.12072e-13	73Iso_Up	94.5872	49.8739	40.9821	182.258	105.235
FBgn0004654	Pgd	-1.65529	1.01643e-12	73Iso_Up	85.1658	43.6049	48.29	107.201	141.567
FBgn0030239	Pgls	-1.44964	0.00011405	73Iso_Up	22.8189	9.40336	17.7684	26.8003	37.3034
FBgn0003076	Pgm1	-1.51052	1.14274e-12	73Iso_Up	259.105	136.917	162.877	339.806	396.818
FBgn0030310	PGRP-SA	-1.48627	6.98527e-06	73Iso_Up	8.37883	4.18852	5.63623	13.1291	10.5615
FBgn0039780	PH4alphaNE1	1.2605	0.0115399	73Grp_Up	3.01797	3.91113	4.96752	1.58788	1.60535
FBgn0035089	Phk-3	-1.72977	1.06788e-09	73Iso_Up	12.8717	6.32438	7.06917	16.8857	21.2076
FBgn0013725	phyl	1.29875	1.54729e-13	73Grp_Up	74.0882	115.531	103.984	40.0843	36.7542
FBgn0031540	Pif1	-1.73879	0.0219062	73Iso_Up	1.21795	0.859894	0.382117	1.89771	1.73209
FBgn0034909	pippin	-1.34734	3.04216e-10	73Iso_Up	59.7669	35.2834	39.6446	76.6055	87.5341
FBgn0026576	Pisd	-1.37223	1.75561e-09	73Iso_Up	74.9955	43.2721	49.1976	120.95	86.5624
FBgn0030400	Pits	1.21202	1.28187e-09	73Grp_Up	328.249	559.736	398.835	178.385	176.04
FBgn0016696	Pitslre	1.07758	5.28094e-08	73Grp_Up	708.945	1153.2	864.301	390.154	428.123
FBgn0086706	pix	-1.08862	1.3724e-11	73Iso_Up	266.019	194.697	181.123	351.386	336.871
FBgn0038139	PK2-R2	1.17331	0.00935195	73Grp_Up	3.84539	6.35212	4.77646	2.47864	1.77434
FBgn0030317	pkm	-1.03959	3.83747e-10	73Iso_Up	599.987	434.136	431.983	761.485	772.345
FBgn0003130	Poxn	1.30669	0.000491103	73Grp_Up	5.40856	7.54488	8.5021	2.67228	2.91499
FBgn0039676	ppk20	-6.75255	0.00428978	73Iso_Up	0.304526	0	0	0.0774575	1.14065
FBgn0003137	Ppn	-1.53073	1.82223e-11	73Iso_Up	41.5677	28.2101	19.488	64.3285	54.2441
FBgn0283437	PPO1	-1.5494	6.90489e-11	73Iso_Up	15.2691	9.40336	7.92893	23.0436	20.7006
FBgn0033367	PPO2	1.25007	1.86246e-09	73Grp_Up	40.4563	65.0746	53.7352	23.6245	19.391
FBgn0261363	PPO3	-3.75323	0.0405048	73Iso_Up	0.289249	0.0832156	0	0.271101	0.802677
FBgn0267824	PRAS40	-1.09619	2.00251e-07	73Iso_Up	52.5285	36.6148	37.1609	77.109	59.2291
FBgn0041194	Prat2	-2.1396	1.37698e-26	73Iso_Up	122.807	47.9044	54.1173	218.701	170.506
FBgn0033635	Prip	-1.23169	0.00127856	73Iso_Up	5.64334	4.54912	2.91364	7.12609	7.98453
FBgn0024734	PRL-1	-1.30235	0.00396794	73Iso_Up	6.1431	5.46449	2.38823	9.41109	7.30859
FBgn0004595	pros	1.57775	1.38526e-10	73Grp_Up	1833.98	3621.49	2083.4	835.263	795.791
FBgn0261976	Psf2	-2.33843	3.87196e-10	73Iso_Up	5.47419	1.69205	2.436	8.55906	9.20967
FBgn0030926	psh	-2.10941	6.84205e-17	73Iso_Up	15.7236	6.047	7.30799	26.2194	23.3199
FBgn0035770	pst	-1.18619	9.93788e-11	73Iso_Up	190.259	123.686	132.786	272.844	231.72
FBgn0020912	Ptx1	1.33179	1.57563e-06	73Grp_Up	10.4973	16.865	14.4249	5.46076	5.23853
FBgn0020385	pug	-3.12236	1.31399e-57	73Iso_Up	184.137	42.6896	43.6091	374.972	275.276
FBgn0037513	pyd3	-1.05929	0.000283874	73Iso_Up	49.1582	27.7385	42.415	59.1388	67.3404
FBgn0022986	qkr58E-1	1.09654	4.88041e-07	73Grp_Up	80.6962	134.532	95.9591	44.8092	47.4847
FBgn0086913	Rab26	1.15878	1.23385e-05	73Grp_Up	115.969	212.477	122.898	69.9054	58.5955
FBgn0025382	Rab27	1.28858	3.04917e-09	73Grp_Up	54.544	74.9772	86.2629	27.1101	29.8258
FBgn0265597	rad	1.31208	1.35182e-10	73Grp_Up	303.701	528.363	375.096	151.275	160.071
FBgn0052062	Rbfox1	1.14035	1.24968e-08	73Grp_Up	602.232	1016.64	718.093	344.415	329.774
FBgn0030479	Rbp1-like	1.30805	1.09309e-08	73Grp_Up	481.218	878.201	552.35	260.025	234.297
FBgn0260943	Rbp6	1.21218	3.71264e-07	73Grp_Up	1404.84	2557.69	1547.86	777.054	736.773
FBgn0037012	Rcd2	-1.36994	7.75484e-07	73Iso_Up	9.76269	5.9083	6.2094	13.71	13.2231
FBgn0064227	Rdh	1.26881	0.0263152	73Grp_Up	8.48556	19.7221	5.3974	4.26016	4.56259
FBgn0038946	rdhB	-1.16465	0.00069762	73Iso_Up	84.4898	38.5843	75.898	109.37	114.107
FBgn0004244	Rdl	1.55113	3.31087e-13	73Grp_Up	1361.04	2543.9	1670.42	620.861	608.979
FBgn0016715	Reg-2	-1.92406	2.62943e-10	73Iso_Up	14.8883	5.49223	8.45434	24.3991	21.2076
FBgn0040074	retinin	-1.01502	2.06064e-05	73Iso_Up	528.016	362.154	404.375	810.361	535.175
FBgn0003248	Rh2	-2.39415	5.20527e-22	73Iso_Up	153.372	44.0765	66.3451	248.406	254.66
FBgn0014019	Rh5	-2.16306	9.93688e-37	73Iso_Up	275.581	116.141	111.101	416.838	458.244
FBgn0036260	Rh7	-1.10108	1.25328e-06	73Iso_Up	20.6513	15.9774	13.0397	27.2263	26.3616
FBgn0267337	rn	1.0841	2.10644e-05	73Grp_Up	44.7694	78.0562	49.5319	25.6772	25.8124
FBgn0011704	RnrS	-1.25588	0.00909203	73Iso_Up	3.04925	2.02491	1.95835	4.91855	3.2952
FBgn0039152	Root	-3.17504	1.46546e-28	73Iso_Up	14.5359	2.91254	3.77341	23.2373	28.2204
FBgn0011705	rost	-3.74058	4.40754e-36	73Iso_Up	22.6053	3.46731	3.82117	32.6483	50.4842
FBgn0024733	RpL10	-1.37178	1.52279e-13	73Iso_Up	812.454	472.831	532.241	1093.2	1151.55
FBgn0036213	RpL10Ab	-1.35819	2.6653e-05	73Iso_Up	1078.47	455.993	878.248	1422.08	1557.57
FBgn0013325	RpL11	-1.34205	4.53059e-08	73Iso_Up	749.548	388.145	550.105	973.37	1086.57
FBgn0028697	RpL15	-1.1372	2.7046e-12	73Iso_Up	850.038	586.032	588.03	1122.75	1103.34
FBgn0035753	RpL18	-1.03235	1.28528e-06	73Iso_Up	737.934	488.725	578.907	876.742	1007.36
FBgn0010078	RpL23	-1.31479	0.000118423	73Iso_Up	844.645	351.808	714.75	1080.84	1231.18
FBgn0039359	RpL27	-1.14868	1.39835e-06	73Iso_Up	740.656	428.394	586.359	932.317	1015.56
FBgn0086710	RpL30	-1.51161	1.52895e-10	73Iso_Up	400.987	193.726	268.676	546.889	594.657
FBgn0002626	RpL32	-1.0842	3.51953e-05	73Iso_Up	814.673	461.957	686.234	1002.77	1107.74
FBgn0031980	RpL36A	-1.12106	2.11217e-05	73Iso_Up	563.528	308.73	471.58	731.199	742.603
FBgn0023170	RpL39	-1.71801	0.0401547	73Iso_Up	211.035	60.9693	156.62	300.535	326.014
FBgn0066084	RpL41	-2.08263	0.0335889	73Iso_Up	522.945	107.154	336.693	743.36	904.575
FBgn0064225	RpL5	-1.04623	4.27644e-06	73Iso_Up	1678.9	1027.16	1379.39	2191	2118.05
FBgn0015756	RpL9	-1.09219	6.43205e-06	73Iso_Up	832.931	492.581	678.21	1026.16	1134.77
FBgn0002593	RpLP1	-1.27269	2.54864e-06	73Iso_Up	1244.13	629.72	977.742	1584.35	1784.69
FBgn0028694	Rpn11	1.10168	5.21252e-09	73Grp_Up	72.3627	113.783	92.8544	43.6086	39.2045
FBgn0029745	Rpn13R	2.73959	3.79577e-06	73Grp_Up	3.01672	7.54488	3.15247	0.735846	0.633693
FBgn0261396	Rpn3	1.00627	8.88438e-08	73Grp_Up	107.463	167.818	133.216	67.8141	61.0035
FBgn0028691	Rpn9	1.20283	5.43484e-12	73Grp_Up	102.156	159.94	137.562	56.118	55.0045
FBgn0286213	RpS12	-1.19451	0.000174767	73Iso_Up	606.726	293.113	519.393	717.683	896.717
FBgn0034138	RpS15	-1.14546	2.10139e-05	73Iso_Up	835.196	456.742	688.527	1016.13	1179.39
FBgn0010198	RpS15Aa	-1.32864	8.17266e-10	73Iso_Up	520.259	293.751	362.963	665.747	758.572
FBgn0010412	RpS19a	-1.01869	6.17464e-06	73Iso_Up	615.146	390.309	503.678	752.81	813.788
FBgn0019936	RpS20	-1.60092	1.0024e-11	73Iso_Up	512.519	244.016	322.22	673.687	810.155
FBgn0033912	RpS23	-1.13602	0.000129203	73Iso_Up	1075.6	541.456	935.518	1403.41	1422.01
FBgn0261596	RpS24	-1.06633	4.07758e-06	73Iso_Up	648.983	399.601	523.882	791.616	880.833
FBgn0003942	RpS27A	-1.05029	3.76047e-05	73Iso_Up	686.379	401.071	581.2	846.882	916.362
FBgn0030136	RpS28b	-1.22625	1.349e-05	73Iso_Up	572.556	288.536	466.995	728.72	805.973
FBgn0261599	RpS29	-1.3618	1.76169e-09	73Iso_Up	422.949	222.213	301.777	598.708	569.098
FBgn0002622	RpS3	-1.09745	4.69715e-06	73Iso_Up	915.346	533.328	748.711	1192.69	1186.65
FBgn0017545	RpS3A	-1.22691	8.91327e-12	73Iso_Up	901.504	562.343	630.541	1238.86	1174.27
FBgn0011284	RpS4	-1.13241	7.61797e-08	73Iso_Up	1118.38	701.063	845.338	1380.06	1547.06
FBgn0002590	RpS5a	-1.25414	5.04088e-09	73Iso_Up	669.915	386.98	488.059	870.39	934.232
FBgn0010408	RpS9	-1.02976	0.000140436	73Iso_Up	848.39	487.782	737.295	1018.37	1150.11
FBgn0024941	RSG7	1.0945	6.78685e-06	73Grp_Up	233.076	413.665	252.197	135.86	130.583
FBgn0029950	rumpel	-1.07969	3.06172e-07	73Iso_Up	26.8196	18.9177	19.1059	36.1339	33.121
FBgn0020617	Rx	1.28966	3.30355e-07	73Grp_Up	14.5084	23.3836	19.5357	8.01685	7.09736
FBgn0003308	ry	-1.13631	1.05182e-08	73Iso_Up	38.6564	28.9313	24.5033	53.833	47.358
FBgn0037672	sage	1.02716	0.00706428	73Grp_Up	7.67408	12.5378	9.07528	3.71796	5.36526
FBgn0032330	Samuel	-1.06935	5.4196e-05	73Iso_Up	13.3435	10.7348	8.26328	18.28	16.0958
FBgn0000416	Sap-r	-1.01899	1.71039e-09	73Iso_Up	745.328	592.606	494.077	1004.59	890.043
FBgn0034276	Sardh	-3.37019	1.40081e-21	73Iso_Up	18.4731	4.04982	3.34352	45.545	20.9541
FBgn0002306	sas	-1.31539	3.52958e-07	73Iso_Up	22.3149	17.1979	11.2247	31.6027	29.2344
FBgn0033033	scaf	-1.58548	4.36145e-20	73Iso_Up	69.2494	39.8603	37.3997	103.29	96.448
FBgn0037298	Sccpdh1	-1.28868	3.42015e-09	73Iso_Up	86.8441	50.068	61.6641	114.017	121.627
FBgn0038038	Sccpdh2	-1.66455	6.02831e-10	73Iso_Up	55.5362	23.5777	35.7757	78.4257	84.3656
FBgn0030357	Sclp	3.01692	5.25577e-22	73Grp_Up	135.871	273.002	217.902	36.4825	16.0958
FBgn0035298	SCOT	-1.34713	2.39589e-06	73Iso_Up	40.3888	19.9995	30.3305	62.4308	48.7943
FBgn0020908	Scp1	-2.07553	0.0146652	73Iso_Up	133.701	30.9839	82.585	238.647	182.588
FBgn0037889	scpr-A	2.31154	0.0135911	73Grp_Up	0.875182	1.35919	1.624	0.348559	0.168985
FBgn0037879	scpr-C	1.5107	0.00710245	73Grp_Up	3.50061	3.52279	7.21246	1.70407	1.56311
FBgn0004880	scrt	1.0695	7.23774e-06	73Grp_Up	687.511	1210.92	743.361	408.317	387.44
FBgn0037643	ScsbetaA	-1.00648	1.8079e-08	73Iso_Up	351.85	246.79	267.625	467.185	425.799
FBgn0021765	scu	-1.14857	2.87459e-05	73Iso_Up	93.2206	50.7892	76.9011	116.341	128.851
FBgn0086357	Sec61alpha	-1.14505	1.63442e-10	73Iso_Up	104.814	72.7027	71.6947	133.924	140.933
FBgn0036727	SecCl	-1.24798	0.000427597	73Iso_Up	5.62956	3.43958	3.96446	8.01685	7.09736
FBgn0266666	Sem1	1.18837	3.09941e-08	73Grp_Up	32.2967	45.7408	48.0035	17.2343	18.2081
FBgn0019929	Ser7	-1.23369	3.54593e-09	73Iso_Up	40.2258	25.0201	28.1334	54.1815	53.5682
FBgn0263006	SERCA	-1.22724	1.06819e-11	73Iso_Up	1288.13	927.049	780.426	1919.63	1525.43
FBgn0260653	serp	1.59997	3.29003e-06	73Grp_Up	24.0187	48.0154	26.8437	13.4002	7.81554
FBgn0035162	Sf3b3	-1.08388	0.000196382	73Iso_Up	18.3987	16.2548	9.83951	24.0118	23.4889
FBgn0003380	Sh	1.34363	2.56887e-11	73Grp_Up	1528.53	2700.62	1871.32	779.687	762.501
FBgn0085387	shakB	1.42307	5.53104e-08	73Grp_Up	174.915	340.074	190.581	89.0762	79.9298
FBgn0052423	shep	1.3448	2.29916e-12	73Grp_Up	2093.27	3608.73	2653.47	1030.96	1079.94
FBgn0029823	Shmt	-1.71373	1.75758e-07	73Iso_Up	124.181	62.5226	66.154	254.913	113.135
FBgn0039593	Sid	-2.89684	2.79976e-07	73Iso_Up	2.08237	0.471555	0.668705	4.10525	3.08397
FBgn0053527	SIFa	1.20216	2.27031e-06	73Grp_Up	41.4758	51.233	69.3065	22.8887	22.475
FBgn0030300	Sk1	-1.06153	0.00123108	73Iso_Up	14.769	8.26608	12.8009	20.139	17.8701
FBgn0026176	SkpB	-1.82558	0.00128566	73Iso_Up	1.89354	0.915371	0.955293	3.25322	2.45028
FBgn0037140	SLC22A	-1.36499	0.000122491	73Iso_Up	6.48706	4.93746	3.1047	9.37236	8.53373
FBgn0002941	slou	1.33115	2.53688e-05	73Grp_Up	10.9684	19.8608	12.8487	5.9255	5.23853
FBgn0038257	smp-30	-3.1872	4.52394e-33	73Iso_Up	55.4167	9.81944	15.2369	92.1357	104.475
FBgn0265523	Smr	1.08351	3.63105e-07	73Grp_Up	330.797	557.655	385.031	186.169	194.332
FBgn0053548	SmydA-8	-1.06954	1.28768e-07	73Iso_Up	112.327	73.9786	85.833	142.522	146.974
FBgn0086032	snoRNA:Me28S-C437	3.43914	0.00130418	73Grp_Up	0.835551	1.99717	1.09859	0.0774575	0.168985
FBgn0031646	snsl	-1.35113	0.00527507	73Iso_Up	2.89175	1.5811	2.05388	3.83415	4.09788
FBgn0024289	Sodh-1	-2.69994	3.16243e-24	73Iso_Up	91.8872	25.353	30.5216	123.467	188.207
FBgn0020378	Sp1	1.12204	0.000288916	73Grp_Up	14.3478	23.1894	17.9117	9.95329	6.33693
FBgn0033358	spab	1.06485	4.06951e-06	73Grp_Up	128.76	157.028	207.155	77.2639	73.5928
FBgn0026562	SPARC	-1.24532	1.27557e-07	73Iso_Up	181.223	102.327	135.413	228.732	258.42
FBgn0037723	SpdS	-1.25349	8.00103e-06	73Iso_Up	67.4929	38.6398	49.8185	74.6303	106.883
FBgn0039102	SPE	-1.49756	3.12769e-12	73Iso_Up	54.4065	28.4597	34.8204	79.7813	74.5645
FBgn0016977	spen	1.06392	3.09937e-05	73Grp_Up	546.361	982.748	568.877	329.349	304.468
FBgn0032451	spict	-1.21938	2.83165e-08	73Iso_Up	29.9675	19.2783	20.6343	38.3027	41.6547
FBgn0086676	spin	-1.25441	1.34504e-12	73Iso_Up	90.2445	63.5767	54.595	129.122	113.684
FBgn0033170	sPLA2	-1.11779	7.94637e-06	73Iso_Up	21.2535	13.3145	16.2877	29.0078	26.4039
FBgn0031973	Spn28Dc	-1.19143	6.49401e-08	73Iso_Up	19.9048	13.897	12.9442	26.839	25.9392
FBgn0265137	Spn42Da	-1.11255	9.84868e-09	73Iso_Up	50.0729	36.8645	33.0531	71.1447	59.2291
FBgn0028988	Spn42Dd	-1.39066	3.01864e-07	73Iso_Up	27.9334	14.008	20.2044	39.5421	37.9793
FBgn0024293	Spn43Ab	-1.8431	9.75545e-21	73Iso_Up	217.656	97.6396	114.301	362.114	296.568
FBgn0033574	Spn47C	-1.04739	0.000931001	73Iso_Up	7.31831	5.38127	5.15858	9.10126	9.63213
FBgn0262057	Spn77Ba	-1.22495	2.66046e-10	73Iso_Up	46.9769	30.762	31.5247	67.1944	58.4265
FBgn0038299	Spn88Eb	-2.06292	1.38416e-06	73Iso_Up	9.63879	3.49505	4.82423	21.0684	9.16742
FBgn0267347	squ	-1.97365	0.0369913	73Iso_Up	0.802682	0.527032	0.191059	1.39424	1.0984
FBgn0014033	Sr-CI	-1.21846	0.00128021	73Iso_Up	5.16999	3.85565	3.00917	7.90067	5.91447
FBgn0003507	srp	-2.24874	2.78006e-19	73Iso_Up	22.845	8.2106	9.69622	42.2531	31.2199
FBgn0037684	Srr	-2.60427	9.45125e-20	73Iso_Up	10.8698	3.05124	3.96446	18.5511	17.9124
FBgn0052667	ssp7	-2.75145	0.000305679	73Iso_Up	50.0758	8.98728	20.2522	69.673	101.391
FBgn0003515	st	-1.40383	1.09309e-08	73Iso_Up	14.4887	9.68074	7.97669	21.4557	18.8418
FBgn0265052	St3	1.46219	2.54225e-15	73Grp_Up	52.5467	85.8507	74.3218	25.6384	24.376
FBgn0016917	Stat92E	-1.09998	2.89434e-11	73Iso_Up	183.383	136.363	121.561	240.002	235.607
FBgn0288700	stg1	1.38761	4.1551e-07	73Grp_Up	21.6257	39.8048	25.363	10.6891	10.646
FBgn0011336	Stt3B	-1.18176	5.94527e-10	73Iso_Up	51.4027	38.1127	31.5724	68.1626	67.7629
FBgn0286203	stw	-1.02848	0.000665227	73Iso_Up	11.6279	8.23834	8.59763	17.4667	12.2091
FBgn0086450	su(r)	-1.3673	1.19352e-12	73Iso_Up	61.7408	36.5594	39.979	89.2698	81.1549
FBgn0003638	su(w[a])	1.03024	2.84222e-07	73Grp_Up	485.752	783.253	585.929	273.077	300.751
FBgn0033782	sug	-2.21274	1.05872e-07	73Iso_Up	16.4623	7.40618	5.92281	15.2591	37.2611
FBgn0036191	Sugb	-1.12785	3.16968e-05	73Iso_Up	15.0933	12.3991	8.54987	20.3713	19.053
FBgn0038398	sxe2	-3.69682	1.00116e-86	73Iso_Up	51.4138	8.90406	7.97669	99.804	88.9705
FBgn0013343	Syx1A	1.10092	0.00013896	73Grp_Up	393.251	743.365	382.26	235.006	212.372
FBgn0086367	t	-1.50574	6.87021e-21	73Iso_Up	356.381	216.666	196.838	539.414	472.608
FBgn0017482	T3dh	-1.82657	6.00549e-09	73Iso_Up	8.31219	3.7447	4.48988	11.5799	13.4343
FBgn0023477	Taldo	-2.02508	5.51265e-11	73Iso_Up	185.165	62.1898	101.739	233.651	343.081
FBgn0030558	Tat	-1.61339	0.00353685	73Iso_Up	3.8874	1.4424	2.86588	4.14398	7.09736
FBgn0037874	Tctp	-1.18046	1.26752e-10	73Iso_Up	581.101	368.728	417.033	777.79	760.854
FBgn0035638	Tektin-C	1.87723	0.00509057	73Grp_Up	1.72463	2.57968	3.00917	0.464745	0.844924
FBgn0041182	Tep2	-1.95365	1.60933e-32	73Iso_Up	123.1	58.029	55.5503	190.739	188.08
FBgn0041180	Tep4	-1.15671	3.1051e-11	73Iso_Up	192.34	132.923	130.111	275.323	231.002
FBgn0023479	teq	-2.04335	9.66104e-35	73Iso_Up	213.547	91.9532	95.577	339.419	327.239
FBgn0036899	tey	1.15577	5.65937e-07	73Grp_Up	24.7729	39.6661	31.859	13.2452	14.3215
FBgn0261560	Thor	-1.13219	2.8156e-06	73Iso_Up	170.844	112.507	122.898	271.721	176.251
FBgn0037487	thw	-1.4988	0.00202014	73Iso_Up	3.86068	2.94028	1.52847	6.62262	4.35136
FBgn0011722	Tig	-1.23913	2.09161e-10	73Iso_Up	62.69	40.2763	42.415	81.2529	86.8159
FBgn0014396	tim	-1.63082	5.42868e-15	73Iso_Up	118.788	75.8648	54.2606	164.171	180.856
FBgn0011837	Tis11	-1.47039	9.67866e-08	73Iso_Up	31.8546	24.0493	13.7084	45.4288	44.2318
FBgn0039298	to	-2.32217	1.58285e-08	73Iso_Up	12.7607	3.10671	6.44823	26.0257	15.4621
FBgn0261575	tobi	-5.46496	6.45991e-05	73Iso_Up	59.4944	3.21767	3.00917	28.9691	202.782
FBgn0029114	Tollo	-1.07103	0.00440055	73Iso_Up	7.74733	7.07332	3.96446	9.64346	10.3081
FBgn0030412	Tomosyn	1.04516	1.38298e-06	73Grp_Up	768.509	1303.79	869.125	460.911	440.205
FBgn0037751	topi	1.29013	0.0341335	73Grp_Up	2.65798	4.27173	3.58235	1.97517	0.802677
FBgn0028396	TotA	-1.59495	2.33387e-05	73Iso_Up	5.83144	2.63516	3.86894	8.28796	8.53373
FBgn0044812	TotC	-4.03067	4.5444e-05	73Iso_Up	0.815328	0.0832156	0.143294	1.47169	1.56311
FBgn0031701	TotM	-2.73767	0.000139591	73Iso_Up	1.4784	0.527032	0.334352	3.44686	1.60535
FBgn0044810	TotX	-3.9286	3.65812e-05	73Iso_Up	0.9511	0.055477	0.238823	1.82025	1.68985
FBgn0035719	tow	1.42246	1.01838e-14	73Grp_Up	190.336	326.316	250.43	93.2201	91.3785
FBgn0013348	TpnC41C	-1.35194	0.000759649	73Iso_Up	34.4973	12.7875	29.9007	53.0971	42.2039
FBgn0010423	TpnC47D	3.75551	2.36833e-10	73Grp_Up	4.6049	12.9816	4.34658	0.542203	0.5492
FBgn0027560	Tps1	-2.59185	2.08537e-39	73Iso_Up	391.712	112.175	139.807	676.824	638.044
FBgn0028978	trbl	-1.49917	8.58917e-09	73Iso_Up	18.4852	10.5961	10.9859	23.0823	29.2766
FBgn0038343	Trissin	1.3933	8.11308e-12	73Grp_Up	49.1942	70.2617	77.8563	24.2829	24.376
FBgn0085391	trv	1.31035	2.32157e-09	73Grp_Up	531.75	958.366	622.946	283.804	261.884
FBgn0034094	Tsf3	-1.44988	1.84438e-08	73Iso_Up	11.5354	6.99011	6.78258	16.1886	16.1803
FBgn0003867	tsl	-1.39675	8.526e-09	73Iso_Up	33.6423	18.0855	23.0703	45.0416	48.3719
FBgn0031850	Tsp	-1.58763	3.65617e-19	73Iso_Up	83.74	46.6007	46.7616	119.168	122.429
FBgn0032943	Tsp39D	-1.01926	4.81977e-07	73Iso_Up	50.5364	35.2002	38.3072	68.395	60.2431
FBgn0029508	Tsp42Ea	1.69129	0.0146657	73Grp_Up	2.25009	2.08039	5.01529	0.890762	1.01391
FBgn0033139	Tsp42Er	-4.76992	0.00402023	73Iso_Up	0.397621	0.055477	0	0.774575	0.760431
FBgn0032470	Ttc30	-1.22229	0.00372268	73Iso_Up	3.68739	2.33004	2.57929	5.15093	4.68933
FBgn0003870	ttk	-1.08065	2.91327e-09	73Iso_Up	64.57	46.5175	44.9465	88.534	78.2822
FBgn0031854	TTLL3A	1.06532	0.0275859	73Grp_Up	3.65697	6.35212	4.01223	2.36245	1.90108
FBgn0086368	tw	-1.08881	0.0225404	73Iso_Up	2.89374	2.08039	2.00611	4.06652	3.42194
FBgn0037225	TwdlG	1.17948	6.49401e-08	73Grp_Up	24.8498	39.2223	32.8143	14.0973	13.2653
FBgn0284435	tyn	1.08416	1.68121e-07	73Grp_Up	58.3968	94.4219	71.7902	35.9016	31.4734
FBgn0003943	Ubi-p63E	1.04436	4.09441e-09	73Grp_Up	142.737	213.281	189.387	91.4773	76.8036
FBgn0011327	Uch-L5	1.38113	1.4557e-09	73Grp_Up	28.8651	49.6519	37.1609	15.2979	13.3498
FBgn0014075	Uggt	-1.18658	1.00165e-10	73Iso_Up	63.7851	43.7159	42.5105	83.1119	85.802
FBgn0035978	UGP	-1.87268	1.96515e-31	73Iso_Up	188.195	91.8145	89.2721	297.05	274.642
FBgn0032684	Ugt301D1	-1.36623	6.45743e-05	73Iso_Up	11.8641	9.56979	5.15858	18.28	14.4482
FBgn0040259	Ugt302C1	-1.27263	1.87491e-08	73Iso_Up	28.4684	20.6929	16.24	42.6791	34.2617
FBgn0040257	Ugt302E1	-2.87511	0.00767141	73Iso_Up	0.677049	0.305124	0.0477646	1.04568	1.30963
FBgn0040256	Ugt35C1	-1.79746	1.06452e-21	73Iso_Up	48.3642	23.7996	24.5988	76.4506	68.6078
FBgn0015663	Ugt36A1	-1.37352	4.66162e-06	73Iso_Up	7.81774	5.27032	4.39435	11.425	10.1813
FBgn0027070	Ugt36E1	-1.64054	1.28043e-16	73Iso_Up	33.589	18.0855	18.3894	48.8757	49.0056
FBgn0027074	Ugt36F1	-2.2164	1.19703e-08	73Iso_Up	3.97983	1.60883	1.57623	6.77753	5.95671
FBgn0038083	Ugt37A3	-3.50945	9.02529e-07	73Iso_Up	2.33782	0.277385	0.62094	2.285	6.16794
FBgn0026755	Ugt37B1	-5.38613	1.20716e-05	73Iso_Up	0.916823	0.0832156	0	2.40118	1.18289
FBgn0027073	Ugt49B1	-1.49029	4.01097e-13	73Iso_Up	59.5733	31.927	37.6385	86.5588	82.1688
FBgn0050438	Ugt50B3	-2.46803	2.85017e-11	73Iso_Up	6.33027	1.74753	2.67482	11.7735	9.12517
FBgn0086691	UK114	-2.27408	2.92448e-16	73Iso_Up	29.2403	8.79311	13.804	48.5271	45.8371
FBgn0003965	v	-1.7373	1.71633e-12	73Iso_Up	24.6466	11.0677	14.3772	37.9929	35.1488
FBgn0030262	Vago	-1.46861	4.13424e-05	73Iso_Up	12.069	5.15936	9.07528	18.2412	15.8001
FBgn0053200	VepD	1.06671	5.75431e-05	73Grp_Up	12.5374	18.4461	17.0997	7.12609	7.47757
FBgn0003975	vg	1.42753	1.22261e-05	73Grp_Up	9.35467	17.1424	11.2247	4.53127	4.52034
FBgn0028670	Vha100-2	-1.13356	5.21676e-08	73Iso_Up	49.2676	38.2514	29.9484	70.4863	58.3842
FBgn0028664	VhaM9.7-c	-1.05595	0.00090356	73Iso_Up	9.35834	7.85	5.5407	13.4389	10.6038
FBgn0283545	vilya	4.19747	0.0125891	73Grp_Up	0.441194	0.970848	0.716469	0.0774575	0
FBgn0016076	vri	-1.85171	9.72686e-27	73Iso_Up	79.2695	38.723	38.4505	121.066	118.839
FBgn0010516	wal	-1.07514	4.77724e-06	73Iso_Up	159.561	96.3081	129.681	204.488	207.767
FBgn0039620	wat	-1.37087	7.99427e-13	73Iso_Up	69.7529	43.6327	42.6538	107.008	85.7175
FBgn0034718	wdp	-1.19712	3.66815e-10	73Iso_Up	41.368	29.486	26.1273	57.9382	51.9206
FBgn0284084	wg	-1.30128	0.0182279	73Iso_Up	2.15603	1.60883	1.14635	2.8272	3.04172
FBgn0261862	whd	-1.45956	4.02643e-19	73Iso_Up	148.244	90.0392	85.9763	212.195	204.767
FBgn0041087	wun2	-1.15238	0.000578761	73Iso_Up	8.60333	6.90689	4.87199	13.1291	9.50539
FBgn0010772	Xe7	1.05452	5.57034e-08	73Grp_Up	353.351	572.079	428.592	202.009	210.724
FBgn0004832	Xpac	1.00791	2.79946e-05	73Grp_Up	17.2372	24.188	24.0734	10.8441	9.84336
FBgn0032601	yellow-b	-1.56882	7.90475e-07	73Iso_Up	9.57086	6.43534	4.29882	15.7626	11.7867
FBgn0041713	yellow-c	-1.21569	5.94933e-10	73Iso_Up	38.208	27.7108	23.2614	51.5867	50.273
FBgn0034856	yellow-d2	2.48031	0.00388734	73Grp_Up	2.10006	4.02209	3.24799	1.04568	0.0844924
FBgn0041710	yellow-f	-1.77183	0.000233067	73Iso_Up	2.53657	1.33145	1.24188	4.06652	3.50643
FBgn0038105	yellow-f2	-1.90776	1.59532e-14	73Iso_Up	15.6027	6.79594	7.97669	24.3604	23.2776
FBgn0039896	yellow-h	-1.33037	6.01336e-06	73Iso_Up	9.23067	5.96378	5.68399	14.2909	10.984
FBgn0040064	yip2	-1.16717	1.27026e-06	73Iso_Up	98.0259	56.4756	76.7578	126.682	132.188
FBgn0004649	yl	-5.1965	0.00053608	73Iso_Up	0.862876	0.055477	0.0477646	3.13703	0.211231
FBgn0004045	Yp1	-12.9184	5.92793e-102	73Iso_Up	8489.31	1.96943	3.15247	11895.7	22056.4
FBgn0005391	Yp2	-9.10637	1.99558e-219	73Iso_Up	3860.65	17.614	15.1892	5308.78	10101
FBgn0004047	Yp3	-8.59824	6.90594e-207	73Iso_Up	7958.24	48.9307	47.0004	11060.5	20676.5
FBgn0022959	yps	-1.11152	2.74492e-11	73Iso_Up	354.055	264.209	231.515	453.591	466.905
FBgn0027616	Ythdc1	1.07018	5.76884e-07	73Grp_Up	355.206	598.375	411.206	201.196	210.048
FBgn0265991	Zasp52	-1.03072	5.62186e-08	73Iso_Up	264.212	208.954	173.863	376.87	297.16
FBgn0259789	zld	1.69816	1.55488e-09	73Grp_Up	48.6359	99.6645	54.3561	20.8361	19.6867
FBgn0025693	ZnT41F	-1.07443	8.05154e-05	73Iso_Up	15.5387	13.1203	8.97975	20.4101	19.6445
FBgn0037000	ZnT77C	-2.1103	2.40264e-13	73Iso_Up	8.70994	4.16078	3.20023	14.2135	13.2653
FBgn0004057	Zw	-1.51982	1.82978e-12	73Iso_Up	31.1472	18.779	17.1953	41.1299	47.4847

## Sheet: DGRP370_GrpVSIso
FlyBase ID	GeneSymbol	log2FC	padj	Remark	Avg.norm.exp	370Grp_1	370Grp_2	370Iso_1	370Iso_2
FBgn0031791	AANATL2	-1.55521	0.0193111	370Iso_Up	6.80018	4.57686	2.88372	9.03584	10.7043
FBgn0033936	Achl	-2.02	8.30079e-08	370Iso_Up	29.8793	14.2869	11.4884	53.46	40.282
FBgn0000045	Act79B	-1.13023	0.0397557	370Iso_Up	100.951	94.6222	42.9767	153.341	112.865
FBgn0025595	AkhR	-2.09424	0.000547037	370Iso_Up	5.98001	2.78152	2.13953	8.23212	10.7669
FBgn0012036	Aldh	-1.57063	6.48192e-06	370Iso_Up	242.582	115.155	146.372	304.199	404.604
FBgn0036857	Aldh7A1	-1.2456	0.00200979	370Iso_Up	27.7148	19.0155	16.3256	37.0202	38.4979
FBgn0032477	Alg7	-1.76936	1.13881e-06	370Iso_Up	28.7372	15.9558	12.3256	43.9127	42.7546
FBgn0015575	alpha-Est7	-1.04205	0.00886579	370Iso_Up	65.6663	49.0053	42.7906	73.5289	97.3402
FBgn0000078	Amy-d	-2.68884	7.08021e-10	370Iso_Up	31.6417	12.0364	6.55813	38.0187	69.9535
FBgn0000079	Amy-p	-3.00958	4.53465e-14	370Iso_Up	35.1616	9.2043	7.72092	41.8425	81.8785
FBgn0035076	Ance-5	-2.30919	4.46154e-07	370Iso_Up	10.492	4.37457	3.30232	16.7321	17.5588
FBgn0087002	apolpp	-2.29702	1.08425e-16	370Iso_Up	447.391	179.281	151.023	766.61	692.649
FBgn0033926	Arc1	1.75584	2.67305e-08	370Grp_Up	338.328	484.009	581.999	131.373	155.932
FBgn0032076	Argl	-1.41933	0.00332049	370Iso_Up	21.5731	12.5927	12.5581	22.894	38.2475
FBgn0000120	Arr1	-1.25277	0.0351673	370Iso_Up	14098.8	5366.91	12197.5	14845	23985.6
FBgn0270926	AsnS	-1.19007	0.00728158	370Iso_Up	57.0718	30.6978	43.3488	69.6076	84.6328
FBgn0264267	asRNA:CR43767	-6.9624	0.0393361	370Iso_Up	0.35481	0	0	0.730661	0.68858
FBgn0266736	asRNA:CR45209	-1.83412	0.00523217	370Iso_Up	14.7582	3.74241	10.0465	20.7995	24.4446
FBgn0026565	Ass	-7.21316	0.000656245	370Iso_Up	1.11068	0.0252865	0	1.63181	2.78562
FBgn0038530	AttD	7.59984	0.00780522	370Grp_Up	0.53747	0.708023	1.44186	0	0
FBgn0028482	bdl	-1.02311	0.0454263	370Iso_Up	237.831	123.095	208.883	280.939	338.406
FBgn0003890	betaTub97EF	-1.15498	0.0107972	370Iso_Up	108.485	58.513	84.2789	120.632	170.518
FBgn0027348	bgm	-1.68127	0.00173098	370Iso_Up	14.2431	9.35601	5.30232	16.586	25.7279
FBgn0034331	BomBc2	-1.16817	0.0198131	370Iso_Up	19.4247	12.4915	13.0697	21.8711	30.2662
FBgn0000206	boss	-1.61079	1.0875e-05	370Iso_Up	181.262	78.7422	112.977	280.744	252.584
FBgn0037895	bumpel	-1.45909	0.000715112	370Iso_Up	20.722	14.0087	9.86045	27.5946	31.4243
FBgn0000241	bw	-1.41737	0.0129019	370Iso_Up	15.7399	6.80208	11.5349	22.6505	21.972
FBgn0027843	CAH2	-1.26205	0.00214716	370Iso_Up	58.0486	30.976	41.9999	80.2509	78.9677
FBgn0040629	CAH5	3.85601	0.00119618	370Grp_Up	2.89649	3.9447	6.97673	0.63324	0.0312991
FBgn0038199	CCHa1	1.1495	0.0129019	370Grp_Up	22.3911	32.7713	30.8372	11.4957	14.4602
FBgn0038147	CCHa2	-2.05434	1.20192e-08	370Iso_Up	36.9626	19.0408	12.2325	54.8239	61.7531
FBgn0004782	Ccp84Ab	-6.0785	0.00184919	370Iso_Up	1.6884	0.101146	0	6.52724	0.125196
FBgn0052499	Cda4	-4.49007	0.0391169	370Iso_Up	0.974937	0.177006	0	3.40975	0.312991
FBgn0010350	Cds	-1.12899	0.0016719	370Iso_Up	445.492	289.505	309.348	653.065	530.05
FBgn0266916	Cenp-C	1.32822	0.027886	370Grp_Up	9.26099	13.1743	14.0465	4.62752	5.19565
FBgn0039207	Cftr	-1.19386	0.0123725	370Iso_Up	17.8451	12.6938	10.6511	25.0617	22.9735
FBgn0039094	CG10184	-2.17852	1.22343e-08	370Iso_Up	34.0991	12.795	13.8604	42.5732	67.1679
FBgn0034494	CG10444	-1.40642	0.00168083	370Iso_Up	29.6283	14.8685	19.9535	45.5689	38.1223
FBgn0032726	CG10621	-3.53138	5.0831e-13	370Iso_Up	11.5912	1.66891	2.37209	15.5631	26.7607
FBgn0033174	CG11125	1.75997	0.00281564	370Grp_Up	7.19927	11.3284	11.3953	2.84958	3.22381
FBgn0037166	CG11426	-5.01621	1.78712e-86	370Iso_Up	576.326	38.9665	37.2558	1062.72	1166.36
FBgn0037396	CG11459	-2.58838	0.0268118	370Iso_Up	1.9011	0.708023	0.465116	2.14327	4.28798
FBgn0035484	CG11594	-1.59384	1.24407e-05	370Iso_Up	51.2487	30.5461	24.4651	61.5947	88.3887
FBgn0039303	CG11857	-1.00714	0.00672969	370Iso_Up	73.8443	53.9362	50.9767	92.1851	98.2792
FBgn0037974	CG12224	-2.66678	6.41448e-06	370Iso_Up	7.83229	3.0091	1.6279	9.35246	17.3397
FBgn0029810	CG12239	1.43684	4.12767e-06	370Grp_Up	2374.79	3777.05	3343.58	1012.16	1366.36
FBgn0086673	CG13272	-2.30011	0.00175325	370Iso_Up	3.8944	1.6942	1.16279	5.77222	6.9484
FBgn0032609	CG13280	-2.18325	0.000512418	370Iso_Up	5.64596	1.99764	2.4186	7.74501	10.4226
FBgn0035921	CG13305	-2.16958	0.000608525	370Iso_Up	21.2802	3.84355	12.6511	31.2236	37.4024
FBgn0040827	CG13315	-2.97975	1.44936e-20	370Iso_Up	64.1014	16.1581	15.3023	91.4544	133.491
FBgn0034515	CG13428	-1.57919	0.00246953	370Iso_Up	9.88019	5.58832	5.11627	14.8568	13.9594
FBgn0039151	CG13607	-3.33607	1.53237e-13	370Iso_Up	10.3867	2.09878	2	15.7579	21.6903
FBgn0035873	CG13670	-2.04382	2.62411e-05	370Iso_Up	9.54659	3.89413	4.18604	14.394	15.7122
FBgn0035186	CG13912	-3.16298	0.0471682	370Iso_Up	1.95935	0.859742	0	2.97136	4.00629
FBgn0031002	CG14196	-1.2688	0.0179659	370Iso_Up	12.1377	8.11698	7.16278	14.9298	18.3413
FBgn0038654	CG14298	-1.36746	0.0155936	370Iso_Up	13.514	6.47335	9.6744	18.096	19.8123
FBgn0030554	CG1434	-1.10498	0.00942982	370Iso_Up	32.3881	21.5188	22.4186	39.4801	46.1349
FBgn0033464	CG1441	-1.37152	0.0179659	370Iso_Up	10.3868	7.61124	4.88371	13.8095	15.2427
FBgn0029898	CG14439	-1.07767	0.0324569	370Iso_Up	20.8769	14.1605	14.6046	29.8597	24.8828
FBgn0034321	CG14502	-1.97515	0.0469893	370Iso_Up	2.68597	1.39076	0.976743	4.43268	3.94369
FBgn0040398	CG14629	-1.45992	0.00249303	370Iso_Up	63.8713	28.9025	43.5348	65.8326	117.215
FBgn0030157	CG1468	-1.84792	0.00133852	370Iso_Up	20.5234	6.65036	12.3721	21.5058	41.5652
FBgn0035734	CG14823	-1.21331	0.00567936	370Iso_Up	29.0034	19.4201	18	32.7093	45.8845
FBgn0034390	CG15093	-1.69001	7.89075e-05	370Iso_Up	24.9551	12.6938	12.6977	28.5445	45.8845
FBgn0034394	CG15096	-3.39514	2.77867e-20	370Iso_Up	36.654	8.72385	5.25581	53.6062	79.0303
FBgn0030271	CG15202	-1.32594	0.0291701	370Iso_Up	12.3671	9.98818	5.25581	15.9771	18.2474
FBgn0028526	CG15293	-2.18182	7.38582e-08	370Iso_Up	32.2748	10.6456	14.4651	41.4528	62.5356
FBgn0039827	CG1544	-1.30234	0.0459213	370Iso_Up	14.7623	6.32163	11.8139	19.192	21.7216
FBgn0039782	CG15539	1.56813	0.0301735	370Grp_Up	5.77804	8.29398	9.39533	2.38683	3.03601
FBgn0039829	CG15561	1.33153	0.0370102	370Grp_Up	13.5228	16.1075	23.5348	5.52867	8.92025
FBgn0029766	CG15784	1.33635	0.00127948	370Grp_Up	49.6248	61.5474	84.3254	26.0846	26.5416
FBgn0030218	CG1628	-1.631	0.00357059	370Iso_Up	9.77525	5.33546	4.93022	11.2765	17.5588
FBgn0030027	CG1632	-1.23182	0.00595933	370Iso_Up	37.4752	20.0016	27.7674	49.8311	52.3008
FBgn0029765	CG16756	-3.55099	4.9862e-13	370Iso_Up	8.9986	1.97235	1.11628	14.5645	18.3413
FBgn0035348	CG16758	-1.73646	1.36942e-06	370Iso_Up	114.728	53.0764	60.6045	135.245	209.986
FBgn0032835	CG16772	-1.16897	0.0169118	370Iso_Up	23.2274	15.8799	14.6976	24.8668	37.465
FBgn0040732	CG16926	-3.27808	1.58043e-19	370Iso_Up	35.3773	8.09169	6.37208	48.2967	78.7486
FBgn0032414	CG17211	-1.64066	7.21036e-06	370Iso_Up	32.8531	16.6132	17.8139	50.5374	46.4479
FBgn0031490	CG17264	1.9667	0.0338812	370Grp_Up	3.21161	5.58832	4.8372	0.949859	1.47106
FBgn0038821	CG17267	-1.89653	0.0249018	370Iso_Up	3.6713	1.41605	1.95349	5.86964	5.44605
FBgn0032753	CG17572	-1.12481	0.0370277	370Iso_Up	26.7697	15.0455	20.7442	29.3482	41.9408
FBgn0033710	CG17739	-1.57843	2.01455e-06	370Iso_Up	388.008	184.288	232.744	515.652	619.347
FBgn0039856	CG1774	-1.29501	0.0356089	370Iso_Up	10.1546	7.28252	5.34883	11.6175	16.3694
FBgn0028527	CG18507	-1.14002	0.00249303	370Iso_Up	47.863	35.3	28.8837	63.5432	63.725
FBgn0037973	CG18547	-3.28076	5.06439e-10	370Iso_Up	16.2412	4.14699	2.46511	16.3181	42.0347
FBgn0026563	CG1979	-4.94707	3.30943e-07	370Iso_Up	3.34921	0.429871	0	4.57881	8.38816
FBgn0033204	CG2065	-1.85017	0.00745104	370Iso_Up	5.60445	2.22521	3.02325	7.40403	9.76532
FBgn0030251	CG2145	-1.18663	0.00582156	370Iso_Up	31.5343	21.3418	19.8604	35.8267	49.1083
FBgn0029990	CG2233	-2.86152	5.9821e-22	370Iso_Up	209.391	54.4672	55.7673	302.883	424.447
FBgn0032864	CG2493	-1.56747	0.000919451	370Iso_Up	20.2913	14.1352	8.0465	25.9628	33.0206
FBgn0035090	CG2736	-3.50217	8.47645e-22	370Iso_Up	22.1478	4.19756	3.67441	34.1462	46.5731
FBgn0037537	CG2767	-1.02732	0.00782153	370Iso_Up	79.1393	57.805	53.4883	89.6765	115.588
FBgn0260474	CG30002	-2.44344	0.00021538	370Iso_Up	5.09077	1.39076	2.04651	7.16048	9.76532
FBgn0050428	CG30428	-6.46797	0.00865199	370Iso_Up	0.716922	0	0.0465116	1.63181	1.18937
FBgn0288229	CG3164	-1.02242	0.0113446	370Iso_Up	82.7792	56.9958	59.8604	117.953	96.3074
FBgn0029896	CG3168	-1.02207	0.0234682	370Iso_Up	165.261	145.752	89.6743	241.922	183.694
FBgn0031449	CG31689	-1.5785	2.23473e-05	370Iso_Up	54.7736	36.9942	22.6976	79.9343	79.4684
FBgn0043783	CG32444	-2.6081	1.26094e-08	370Iso_Up	122.535	22.6062	51.1627	160.94	255.432
FBgn0031538	CG3246	-2.29501	6.46456e-06	370Iso_Up	20.3679	10.064	4.97674	22.4557	43.9752
FBgn0052512	CG32512	-1.59604	0.0275329	370Iso_Up	5.69334	3.79298	2.32558	7.67194	8.98284
FBgn0052726	CG32726	-1.33432	0.0272019	370Iso_Up	9.57101	5.23431	6.41859	12.6404	13.9907
FBgn0038878	CG3301	-1.1816	0.00974844	370Iso_Up	32.0097	18.6615	23.1162	37.6534	48.6075
FBgn0053307	CG33307	-2.71274	0.000278051	370Iso_Up	4.81159	1.64362	1.11628	4.7493	11.7372
FBgn0037975	CG3397	-1.98094	0.0107008	370Iso_Up	5.78284	1.94706	3.06976	5.84529	12.2693
FBgn0083970	CG34134	-2.3787	4.68801e-15	370Iso_Up	64.2919	23.8705	21.2558	95.5461	116.495
FBgn0085195	CG34166	-4.69024	2.09003e-45	370Iso_Up	77.6606	5.6389	7.06976	119.122	178.812
FBgn0085360	CG34331	-2.9553	0.000188083	370Iso_Up	9.34365	4.17228	0.558139	12.9571	19.6871
FBgn0031417	CG3597	-1.1213	0.0356089	370Iso_Up	19.3474	13.4271	12.6046	20.4342	30.9235
FBgn0029648	CG3603	-2.07407	0.00143718	370Iso_Up	8.82782	2.52865	4.74418	10.2293	17.8092
FBgn0040349	CG3699	-3.09518	8.24198e-10	370Iso_Up	21.735	4.17228	5.67441	21.725	55.3681
FBgn0035091	CG3829	-2.52937	8.04148e-05	370Iso_Up	14.5616	7.76296	1.76744	23.5516	25.1645
FBgn0036824	CG3902	-1.06979	0.0113237	370Iso_Up	106.13	81.6249	64.9301	108.698	169.266
FBgn0069973	CG40485	-1.39247	0.00175325	370Iso_Up	82.3689	36.185	60.558	107.943	124.79
FBgn0259226	CG42326	-1.47519	0.0102164	370Iso_Up	9.39887	6.42278	4.32557	13.4198	13.4273
FBgn0259715	CG42369	-1.2302	0.012349	370Iso_Up	54.9916	32.0127	37.9534	52.7537	97.2463
FBgn0034741	CG4269	3.32486	2.84058e-07	370Grp_Up	7.23464	18.1304	8.41859	0.730661	1.65885
FBgn0039073	CG4408	-3.32385	1.08275e-07	370Iso_Up	7.61834	2.22521	0.790696	9.74215	17.7153
FBgn0035982	CG4461	-1.64136	0.0015508	370Iso_Up	58.4227	19.4453	40.7906	70.387	103.068
FBgn0029932	CG4607	-1.15677	0.0133047	370Iso_Up	48.95	25.944	38.5581	61.8139	69.484
FBgn0031220	CG4822	-1.45562	0.0227814	370Iso_Up	7.14682	4.70329	3.53488	9.86392	10.4852
FBgn0031907	CG5171	-1.92526	0.00221892	370Iso_Up	11.1466	3.33782	6.60464	13.0788	21.5651
FBgn0040383	CG5254	-1.04313	0.0367297	370Iso_Up	21.8509	15.3236	15.1628	24.8668	32.0503
FBgn0038983	CG5326	-1.25292	0.00582156	370Iso_Up	21.0339	13.3766	13.3488	30.9313	26.479
FBgn0038354	CG5404	-1.51434	0.000715112	370Iso_Up	16.8143	10.8732	7.95348	22.3582	26.0722
FBgn0034364	CG5493	-2.3883	2.74972e-06	370Iso_Up	10.7845	3.81827	3.67441	12.6404	23.0048
FBgn0036764	CG5535	-1.78414	0.00169475	370Iso_Up	7.79707	3.79298	3.81395	12.9083	10.673
FBgn0030603	CG5541	-1.376	0.02177	370Iso_Up	15.5025	12.8961	5.81394	20.9213	22.3789
FBgn0032167	CG5853	-1.98507	0.00027648	370Iso_Up	7.71207	3.41368	3.34883	13.225	10.8608
FBgn0036993	CG5910	-1.01025	0.0393361	370Iso_Up	22.2121	15.8041	15.6744	26.5717	30.7983
FBgn0031913	CG5958	-2.48156	5.06195e-06	370Iso_Up	8.93902	3.86884	2.04651	12.0316	17.8092
FBgn0029831	CG5966	-3.36568	4.27761e-06	370Iso_Up	5.34374	0.758596	1.30232	5.26076	14.0533
FBgn0031914	CG5973	-1.11109	0.015373	370Iso_Up	37.6639	31.2794	20.1395	53.5087	45.728
FBgn0029828	CG6067	-2.11891	6.39993e-05	370Iso_Up	11.2819	3.84355	5.25581	13.4929	22.5354
FBgn0038407	CG6126	-1.7987	4.17981e-08	370Iso_Up	50.9603	23.9463	25.2093	76.7194	77.9661
FBgn0038720	CG6231	-1.86236	0.000105743	370Iso_Up	21.9822	14.1099	6.65115	36.3382	30.8296
FBgn0032287	CG6415	-2.06433	0.000215969	370Iso_Up	15.3743	4.80444	7.90696	16.3912	32.3946
FBgn0040606	CG6503	-2.12933	2.48722e-07	370Iso_Up	59.973	17.1443	30.7441	89.7495	102.254
FBgn0038912	CG6656	-1.45979	0.00351523	370Iso_Up	174.941	64.5818	133.116	212.549	289.517
FBgn0034179	CG6805	-1.12224	0.0023242	370Iso_Up	64.618	42.5319	44.465	82.2724	89.2025
FBgn0032652	CG6870	-1.95533	9.21352e-09	370Iso_Up	74.6148	29.5599	36.3255	102.682	129.891
FBgn0036262	CG6910	-1.77034	2.31518e-08	370Iso_Up	202.907	101.045	97.2557	254.952	358.375
FBgn0035896	CG6983	-1.28026	0.00999898	370Iso_Up	84.4028	39.2194	65.8138	134.174	98.4044
FBgn0038938	CG7084	-1.18311	0.0343706	370Iso_Up	27.2646	13.2754	22.2325	38.2136	35.3367
FBgn0030895	CG7135	-1.91716	2.1357e-06	370Iso_Up	26.6421	10.5445	13.5814	45.4471	36.9955
FBgn0032282	CG7299	1.82669	0.00290817	370Grp_Up	53.5819	47.7662	121.953	14.4671	30.141
FBgn0032025	CG7778	-1.16081	0.0120282	370Iso_Up	22.2515	16.2845	13.2093	26.3038	33.2084
FBgn0037607	CG8036	-1.30295	0.00177904	370Iso_Up	94.5327	53.5569	62.7441	99.857	161.973
FBgn0034045	CG8249	-2.13624	0.00945281	370Iso_Up	6.99568	1.3149	4.23255	8.91407	13.5212
FBgn0032945	CG8665	-1.85962	2.8917e-05	370Iso_Up	18.9506	7.20666	10.4186	27.2537	30.9235
FBgn0036380	CG8757	-1.88359	0.00257997	370Iso_Up	13.7169	3.66655	8.83719	19.0459	23.3178
FBgn0035189	CG9119	-1.53049	0.0208892	370Iso_Up	30.3717	17.827	15.5814	20.629	67.4496
FBgn0031775	CG9150	-2.37585	7.86603e-07	370Iso_Up	15.6599	3.91941	7.02324	24.6233	27.0737
FBgn0037714	CG9396	-2.43686	1.3841e-06	370Iso_Up	9.22717	3.03438	3.2093	12.1046	18.5604
FBgn0037721	CG9427	-1.78191	5.12175e-06	370Iso_Up	62.5168	24.5279	35.8139	81.4931	108.232
FBgn0031800	CG9497	-1.58992	0.026068	370Iso_Up	7.84796	3.81827	4.55813	7.64759	15.3679
FBgn0031801	CG9498	-1.27614	0.0208037	370Iso_Up	13.474	8.24341	8.60464	15.076	21.972
FBgn0030592	CG9514	-4.21221	0.0190501	370Iso_Up	0.95242	0.202292	0	2.16763	1.43976
FBgn0030160	CG9691	-1.28855	0.0095558	370Iso_Up	133.495	67.4645	97.1161	127.866	241.535
FBgn0003060	CG9757	2.99505	0.00394014	370Grp_Up	2.0029	3.99527	3.2093	0.462752	0.34429
FBgn0038160	CG9759	2.50744	3.67281e-07	370Grp_Up	29.738	43.0124	59.3487	4.82236	11.7685
FBgn0032472	CG9928	-1.50807	0.00482226	370Iso_Up	17.3052	7.78825	11.4418	19.8496	30.141
FBgn0035726	CG9953	-1.04935	0.0181318	370Iso_Up	148.116	83.572	121.302	177.258	210.33
FBgn0035499	Chd64	-1.06443	0.00165854	370Iso_Up	246.178	168.105	172.325	315.548	328.735
FBgn0067311	CheB38b	-6.97165	0.0461321	370Iso_Up	0.352246	0	0	1.09599	0.312991
FBgn0267435	chp	-1.75705	6.20404e-07	370Iso_Up	880.953	354.593	509.255	1421.43	1238.54
FBgn0015622	Cnx99A	-1.3298	2.01566e-05	370Iso_Up	348.647	243.206	185.023	482.382	483.978
FBgn0014465	Cp7Fb	1.90374	0.0474119	370Grp_Up	3.62567	4.24814	7.39534	1.16906	1.69015
FBgn0261714	Cpn	-1.64701	9.01763e-07	370Iso_Up	401.311	179.13	237.767	603.648	584.699
FBgn0033728	Cpr49Ae	-1.75723	1.58244e-05	370Iso_Up	19.705	11.2525	8.23254	27.0345	32.3007
FBgn0036619	Cpr72Ec	-1.68917	0.000810029	370Iso_Up	69.6134	23.8705	46.1395	77.2065	131.237
FBgn0000370	crc	-1.22281	0.0107008	370Iso_Up	105.63	82.6869	54.6976	180.035	105.102
FBgn0025680	cry	-1.18438	0.00175325	370Iso_Up	154.149	90.8292	110	181.399	234.368
FBgn0005664	Crys	-1.65651	0.0371664	370Iso_Up	12.7227	7.73768	5.67441	28.715	8.76375
FBgn0035880	Culd	-1.24246	0.00119847	370Iso_Up	560.211	297.597	411.162	691.766	840.318
FBgn0265048	cv-d	-1.2284	0.00322874	370Iso_Up	30.6238	20.2292	19.1628	45.3253	37.778
FBgn0036910	Cyp305a1	-1.64058	0.0104084	370Iso_Up	7.95697	3.23668	5.06976	11.2522	12.2693
FBgn0031432	Cyp309a1	-3.54491	6.81118e-09	370Iso_Up	10.4978	0.960888	2.65116	13.5903	24.7889
FBgn0041337	Cyp309a2	-2.55832	0.00275577	370Iso_Up	4.11101	0.682736	1.90697	5.74787	8.10647
FBgn0038236	Cyp313a1	-2.70848	1.22973e-10	370Iso_Up	20.2213	5.28488	6.46511	41.4041	27.731
FBgn0031693	Cyp4ac1	-1.57753	0.0397557	370Iso_Up	10.115	3.26196	7.53487	11.447	18.2161
FBgn0035344	Cyp4d20	-1.68049	0.0150854	370Iso_Up	5.3468	2.88266	2.60465	7.13612	8.76375
FBgn0031925	Cyp4d21	-3.42985	4.68801e-15	370Iso_Up	11.1551	2.17464	2	22.2608	18.1848
FBgn0014469	Cyp4e2	-1.64295	4.46292e-05	370Iso_Up	21.5224	11.2778	11.2093	27.9843	35.6184
FBgn0010019	Cyp4g1	2.54017	0.0152363	370Grp_Up	6.32241	3.36311	18.4651	2.45989	1.00157
FBgn0015714	Cyp6a17	-4.08933	0.0208465	370Iso_Up	0.985308	0.101146	0.139535	0.63324	3.06731
FBgn0025454	Cyp6g1	-1.11842	0.0104084	370Iso_Up	433.324	298.229	284.651	409.755	740.662
FBgn0031182	Cyp6t1	-2.03389	0.0102164	370Iso_Up	4.60292	1.56776	2.32558	5.28512	9.23324
FBgn0015038	Cyp9b1	-1.42254	0.0406801	370Iso_Up	7.18256	3.66655	4.69767	8.81664	11.5494
FBgn0000406	Cyt-b5-r	-2.21099	1.03e-07	370Iso_Up	82.813	41.4952	22.7441	94.5232	172.489
FBgn0031860	Daao2	-2.99169	2.59642e-06	370Iso_Up	7.54131	1.23904	2.4186	8.79229	17.7153
FBgn0031461	daw	-1.31915	0.0313358	370Iso_Up	8.77782	5.41132	5.39534	12.7866	11.5181
FBgn0086687	Desat1	-1.26484	0.000150672	370Iso_Up	575.922	369.032	355.767	664.609	914.278
FBgn0033885	DJ-1alpha	1.57083	0.0149533	370Grp_Up	7.26061	11.8341	10.4186	2.75216	4.03759
FBgn0000477	DNaseII	-1.75727	0.00111835	370Iso_Up	11.9176	4.57686	7.11627	16.4155	19.5619
FBgn0027453	Dnz1	-1.00824	0.0101428	370Iso_Up	53.7477	38.4861	37.8139	68.0489	70.6421
FBgn0030607	dob	-2.12702	0.0101736	370Iso_Up	5.79746	3.54011	1.16279	6.40546	12.0815
FBgn0010388	Dro	1.73762	0.000194284	370Grp_Up	23.9696	50.2696	25.3953	9.57166	10.6417
FBgn0035290	dsb	-2.14349	6.61559e-06	370Iso_Up	12.6183	6.47335	3.67441	18.2909	22.0346
FBgn0000500	Dsk	2.24251	2.0342e-07	370Grp_Up	201.513	235.139	439.255	49.4658	82.1915
FBgn0260746	Ect3	-1.8425	7.86603e-07	370Iso_Up	22.4191	11.2778	9.90696	33.7809	34.7107
FBgn0003731	Egfr	-1.15886	0.0104084	370Iso_Up	24.2521	15.7029	16.4651	34.2924	30.5479
FBgn0034885	Eglp4	-2.15326	3.49204e-06	370Iso_Up	68.4664	18.1557	35.4883	82.2237	137.998
FBgn0039916	Ekar	-1.08218	0.0156342	370Iso_Up	53.9064	31.507	42.2325	73.7481	68.1382
FBgn0000592	Est-6	-1.55044	0.0406946	370Iso_Up	45.2429	10.0388	38.4651	57.6005	74.8675
FBgn0283427	FASN1	-1.06293	0.00250396	370Iso_Up	334.794	269.731	195.86	406.759	466.826
FBgn0026721	Fatp3	-1.31939	0.0349402	370Iso_Up	35.7421	20.5579	21.0697	46.5675	54.7734
FBgn0034999	fat-spondin	-1.42665	0.000119391	370Iso_Up	10.3082	5.31017	7.30231	12.9083	15.7122
FBgn0030555	Fbxl4	-1.13316	0.00392109	370Iso_Up	177.158	101.121	135.116	222.754	249.642
FBgn0039667	FipoQ	-1.09084	0.0208465	370Iso_Up	23.6828	18.9902	13.5349	30.6878	31.5182
FBgn0038914	fit	-9.28798	2.16336e-20	370Iso_Up	13.4211	0.0758596	0	21.8711	31.7373
FBgn0032773	fon	-1.29902	0.00124334	370Iso_Up	44.8897	29.6358	26	50.2451	73.6781
FBgn0023441	fus	-1.22363	0.0413935	370Iso_Up	20.2215	17.4224	8.88371	31.4184	23.1613
FBgn0000053	Gart	-1.66917	2.8917e-05	370Iso_Up	59.3251	29.3071	31.5813	64.7366	111.675
FBgn0004623	Gbeta76C	-1.61464	0.000494709	370Iso_Up	1796.72	621.416	1255.72	2216.83	3092.92
FBgn0036428	Gbs-70E	-1.24214	0.00278379	370Iso_Up	37.2047	24.9072	22.6976	57.3325	43.8814
FBgn0011770	Gip	-1.23592	0.0227814	370Iso_Up	24.3013	13.68	17.1628	24.4528	41.9095
FBgn0004618	gl	-1.04239	0.00617246	370Iso_Up	67.5234	53.1776	41.5813	88.824	86.5107
FBgn0001114	Glt	-2.04519	8.47494e-07	370Iso_Up	68.1094	38.6125	19.4418	84.1478	130.236
FBgn0034511	GNBP3	-1.58211	0.00420864	370Iso_Up	6.19872	3.84355	2.18604	6.74644	12.0189
FBgn0040321	GNBP-like3	-1.78354	0.0150407	370Iso_Up	20.4648	15.3742	6.88371	24.0144	35.5871
FBgn0038074	Gnmt	-3.12334	4.82194e-14	370Iso_Up	39.8156	6.29635	11.4418	58.1119	83.4121
FBgn0001145	Gs2	-1.09291	0.00342477	370Iso_Up	437.283	261.893	332.976	574.665	579.597
FBgn0033817	GstE14	-1.56676	0.00266164	370Iso_Up	27.2151	10.0388	19.2558	36.874	42.692
FBgn0063498	GstE2	-1.19556	0.0313358	370Iso_Up	12.0617	7.71239	7.99999	15.7579	16.7763
FBgn0063497	GstE3	-1.44131	0.00588906	370Iso_Up	12.9526	7.66182	7.30231	14.9055	21.9407
FBgn0063493	GstE7	-6.05175	0.0387716	370Iso_Up	0.493298	0.0252865	0	0.852438	1.09547
FBgn0010226	GstS1	-1.41547	0.000547037	370Iso_Up	40.6655	30.0657	18	57.8196	56.7766
FBgn0286508	Had1	-1.52794	0.00184532	370Iso_Up	74.2409	32.1392	49.1627	73.8455	141.816
FBgn0061356	Hao	-2.4857	1.16258e-06	370Iso_Up	11.0318	3.23668	3.99999	13.3224	23.5682
FBgn0005619	Hdc	-1.17067	0.000469456	370Iso_Up	155.589	110.881	94.8836	218.687	197.904
FBgn0014000	Hf	-1.76788	0.00613854	370Iso_Up	16.465	5.10788	10.7907	17.0975	32.8641
FBgn0037950	HisCl1	-1.39052	0.00267918	370Iso_Up	18.7593	10.0135	12.186	24.3554	28.4822
FBgn0029167	Hml	-2.30035	1.53511e-05	370Iso_Up	9.91293	4.501	2.8372	19.6061	12.7074
FBgn0001208	Hn	-1.95277	6.51301e-09	370Iso_Up	45.8166	22.505	18.279	62.5446	79.9379
FBgn0025777	homer	-1.01704	0.0212156	370Iso_Up	163.675	97.7324	132.837	230.889	193.241
FBgn0028374	Hug	1.07762	0.0106436	370Grp_Up	307.999	517.969	345.999	146.181	221.848
FBgn0064237	Idgf5	-1.97605	0.00647131	370Iso_Up	7.02563	4.17228	2	7.28226	14.648
FBgn0044047	Ilp6	-1.14013	0.0195302	370Iso_Up	17.6644	12.8961	10.7907	24.1849	22.7858
FBgn0004784	inaC	-1.56723	5.00643e-05	370Iso_Up	948.581	390.5	630.464	1287.94	1485.42
FBgn0001263	inaD	-1.50088	2.1522e-06	370Iso_Up	1145.97	584.827	697.72	1548.25	1753.09
FBgn0259918	inaF-B	-2.37204	0.000885683	370Iso_Up	8.04433	2.55394	3.16279	19.6061	6.8545
FBgn0025885	Inos	-1.08903	0.0022358	370Iso_Up	506.778	316.107	374.79	631.827	704.386
FBgn0027108	Inx2	-1.08708	0.0265237	370Iso_Up	54.4942	34.0357	40.6511	85.9501	57.34
FBgn0265274	Inx3	-1.10826	0.0165147	370Iso_Up	30.1069	24.9072	16.186	39.9915	39.343
FBgn0036757	Ir75a	1.49256	0.0148919	370Grp_Up	8.21005	13.8823	11.0232	4.33526	3.5994
FBgn0260874	Ir76a	1.29846	0.0454263	370Grp_Up	9.07936	11.8847	14.6511	4.99285	4.78876
FBgn0031305	Iris	-3.11742	1.06981e-13	370Iso_Up	17.5174	4.65272	3.25581	23.8196	38.3414
FBgn0010053	Jheh1	-1.92108	1.32875e-06	370Iso_Up	25.6365	10.241	12.8372	34.8038	44.6638
FBgn0034405	Jheh2	-1.25374	0.0017655	370Iso_Up	35.2846	21.1648	23.5348	49.4901	46.9487
FBgn0028425	JhI-21	-1.44821	0.000265037	370Iso_Up	36.1415	22.9096	19.0232	58.5016	44.1317
FBgn0037163	laza	-1.077	0.00918114	370Iso_Up	46.4348	29.6864	34.093	60.6449	61.315
FBgn0024740	Lip2	-2.68646	0.00397457	370Iso_Up	2.32699	0.758596	0.60465	3.53153	4.41317
FBgn0033593	Listericin	2.35941	2.65835e-15	370Grp_Up	204.335	317.548	376.79	58.526	64.4762
FBgn0032253	LManI	-2.22576	0.0410506	370Iso_Up	2.58508	1.46662	0.511627	3.60459	4.75746
FBgn0027611	LManII	-1.71465	1.05606e-07	370Iso_Up	76.5979	40.509	36.6976	100.076	129.109
FBgn0052368	lncRNA:CR32368	1.68549	0.0103464	370Grp_Up	6.17208	10.3422	8.93022	2.41118	3.00471
FBgn0052553	lncRNA:CR32553	-1.51308	0.00339021	370Iso_Up	45.1343	16.3351	33.4883	61.6678	69.0458
FBgn0262142	lncRNA:CR42868	-7.47362	0.00811814	370Iso_Up	0.50957	0	0	0.755016	1.28326
FBgn0263330	lncRNA:CR43411	-2.27648	0.0106676	370Iso_Up	3.84097	0.885028	1.95349	4.70059	7.82478
FBgn0266251	lncRNA:CR44946	-1.2302	0.0442448	370Iso_Up	9.4693	6.42278	5.72092	11.8367	13.8968
FBgn0266691	lncRNA:CR45181	4.0594	0.000119391	370Grp_Up	1.94436	3.33782	4.0465	0.267909	0.125196
FBgn0002562	Lsp1alpha	-9.35995	1.24329e-06	370Iso_Up	1.87316	0	0	3.58024	3.91239
FBgn0002563	Lsp1beta	-7.00855	9.88369e-118	370Iso_Up	412.853	5.84119	8.18603	729.711	907.674
FBgn0002565	Lsp2	-6.81634	1.61069e-41	370Iso_Up	43.8441	0.328725	1.44186	73.261	100.345
FBgn0034140	Lst	-1.855	0.00041077	370Iso_Up	17.1007	10.4939	5.58139	19.119	33.2084
FBgn0268063	ltl	-1.39505	0.000105743	370Iso_Up	44.0217	26.9049	25.3488	65.4916	58.3415
FBgn0030993	Mec2	2.05074	0.000148519	370Grp_Up	8.63702	12.6938	15.6279	2.75216	3.4742
FBgn0038799	MFS9	-1.94816	2.7993e-08	370Iso_Up	41.9846	22.6314	15.0232	64.493	65.7907
FBgn0014863	Mlp84B	-1.00357	0.012349	370Iso_Up	127.043	83.1421	97.3022	175.115	152.614
FBgn0038662	Mpc1	-1.02379	0.00853846	370Iso_Up	59.4333	43.0882	40.6511	70.1435	83.8503
FBgn0026409	Mpcp2	-1.18711	0.00039703	370Iso_Up	1038.39	631.152	724.138	1431.44	1366.83
FBgn0259985	Mppe	-2.28061	1.96663e-13	370Iso_Up	160.555	52.4443	66.0464	249.862	273.867
FBgn0011581	Ms	1.11548	0.0020506	370Grp_Up	440.057	605.815	634.371	218.663	301.379
FBgn0013680	mt:ND2	-2.26907	5.06195e-06	370Iso_Up	16.1376	4.80444	7.2558	32.2709	20.2192
FBgn0052475	mthl8	-6.4841	6.56862e-07	370Iso_Up	1.98091	0.0505731	0.0465116	3.72637	4.10018
FBgn0264272	mwh	-1.43011	3.61818e-05	370Iso_Up	44.4988	27.2083	24.6976	63.6162	62.473
FBgn0036279	Ncc69	-1.23127	0.0103354	370Iso_Up	51.0447	42.7089	23.4418	78.2782	59.75
FBgn0002930	nec	-1.01775	0.0126197	370Iso_Up	79.4527	55.6304	56.372	86.559	119.25
FBgn0033742	Nepl10	-3.75832	0.00328729	370Iso_Up	1.345	0.177006	0.232558	1.77794	3.19251
FBgn0037230	Nepl11	-1.9538	8.58107e-11	370Iso_Up	74.4402	34.5414	31.6744	111.669	119.876
FBgn0039611	Nepl18	-3.36497	1.05606e-07	370Iso_Up	6.61096	1.89649	0.651162	9.49859	14.3976
FBgn0027578	Nepl21	-1.72541	0.0010522	370Iso_Up	14.8336	5.56304	9.20929	20.1175	24.4446
FBgn0031805	Nepl4	-2.63551	1.08066e-08	370Iso_Up	10.981	2.98381	3.67441	20.0201	17.2458
FBgn0032613	Nepl9	-2.66127	0.0173685	370Iso_Up	2.64522	1.28961	0.279069	3.19055	5.82163
FBgn0263390	Nha2	-1.6222	0.00402757	370Iso_Up	15.77	11.7582	5.11627	24.4528	21.7529
FBgn0259896	NimC1	-2.20876	0.012349	370Iso_Up	3.50623	1.84592	0.883719	6.8195	4.47577
FBgn0002936	ninaA	-1.6706	0.00211516	370Iso_Up	305.76	85.873	223.302	380.09	533.775
FBgn0002937	ninaB	-1.41306	0.00246953	370Iso_Up	87.0245	37.0448	64.372	136.414	110.267
FBgn0002938	ninaC	-1.32619	2.62411e-05	370Iso_Up	2689.91	1534.77	1749.39	3623.08	3852.42
FBgn0002939	ninaD	-3.63332	2.68111e-06	370Iso_Up	2.92884	0.455157	0.511627	5.33383	5.41475
FBgn0002940	ninaE	-1.47928	2.23473e-05	370Iso_Up	27188	13282.4	17383.2	33798.8	44287.6
FBgn0037896	ninaG	-1.93139	0.000130553	370Iso_Up	52.3891	13.7812	32.6046	75.5016	87.6688
FBgn0036146	nkt	-1.24562	0.0191477	370Iso_Up	16.1229	12.441	8.13952	18.9972	24.9141
FBgn0010222	Nmdmc	-1.83557	5.39037e-08	370Iso_Up	90.7021	40.863	44.6046	115.274	162.067
FBgn0039801	Npc2h	-1.67849	3.73286e-05	370Iso_Up	50.1637	22.2016	28.9302	58.599	90.9239
FBgn0287423	Nplp2	-2.87509	4.17588e-10	370Iso_Up	270.126	39.0424	99.3487	383.548	558.564
FBgn0036732	Oatp74D	-1.21526	0.0179659	370Iso_Up	22.5909	18.8637	10.5116	29.47	31.5182
FBgn0031111	Obp19c	-1.57482	0.0220196	370Iso_Up	7.21641	3.59069	4.18604	7.81807	13.2708
FBgn0033268	Obp44a	-1.41368	0.00356338	370Iso_Up	49.5983	20.5074	37.1162	66.2466	74.5232
FBgn0043535	Obp57a	-1.38801	0.00274943	370Iso_Up	15.5891	10.4433	8.13952	21.4571	22.3163
FBgn0039682	Obp99c	-1.77314	0.00357059	370Iso_Up	342.429	86.9857	239.721	330.454	712.556
FBgn0034935	Orcokinin	1.56665	9.1409e-06	370Grp_Up	375.655	562.726	586.743	135.465	217.685
FBgn0017561	Ork1	-1.13179	0.0104084	370Iso_Up	25.7655	16.6891	17.8604	33.4886	35.0237
FBgn0037146	P5CS	-2.34696	4.10646e-12	370Iso_Up	105.833	37.3482	37.9069	132.615	215.463
FBgn0020513	Paics	-1.5043	0.000175934	370Iso_Up	85.4659	58.2854	37.9534	94.6693	150.956
FBgn0027580	PCB	-1.00569	0.0133371	370Iso_Up	142.07	123.626	79.4417	169.343	195.87
FBgn0011693	Pdh	-1.14586	0.0120638	370Iso_Up	1311.7	678.792	1051.86	1440.91	2075.22
FBgn0003053	peb	-1.24353	0.00326325	370Iso_Up	70.7051	56.9453	33.9999	105.02	86.855
FBgn0043578	PGRP-SB1	-1.28157	0.0152953	370Iso_Up	20.8716	10.2158	15.7674	29.1777	28.3257
FBgn0043575	PGRP-SC2	-5.22962	0.00210167	370Iso_Up	0.99753	0.101146	0	1.94843	1.94054
FBgn0043791	phu	2.1742	0.000514159	370Grp_Up	5.86339	9.98818	9.53487	1.5831	2.34743
FBgn0037819	Phyhd1	-1.27856	0.000837468	370Iso_Up	35.7018	24.1233	20.6511	44.8869	53.1459
FBgn0038966	pinta	-1.57128	1.62889e-05	370Iso_Up	31.2585	18.9396	15.0697	43.2308	47.7937
FBgn0024943	PIP82	-1.67602	7.55864e-09	370Iso_Up	330.219	169.951	169.767	492.393	488.767
FBgn0034909	pippin	-1.73182	0.000228	370Iso_Up	41.4631	14.0593	26.9302	59.354	65.509
FBgn0030670	Pis	-1.05317	0.0295334	370Iso_Up	396.374	203.354	343.023	507.347	531.772
FBgn0026576	Pisd	-1.14467	0.00223327	370Iso_Up	60.5186	44.6307	36.2325	72.3842	88.8269
FBgn0003137	Ppn	-1.32264	0.0199097	370Iso_Up	26.4468	18.9143	13.8604	48.2236	24.7889
FBgn0041194	Prat2	-2.12847	5.48984e-06	370Iso_Up	42.2601	11.1766	22.4651	55.7738	79.6249
FBgn0287585	Pss	-1.11834	0.00386421	370Iso_Up	43.3371	29.4841	29.0697	57.8927	56.9018
FBgn0020385	pug	-1.72774	3.86637e-05	370Iso_Up	86.739	42.0009	44.279	86.7782	173.898
FBgn0004577	Pxd	-6.36288	0.0394969	370Iso_Up	0.678784	0	0.0465116	2.60602	0.0625982
FBgn0002567	Rab32	-1.3668	4.64394e-05	370Iso_Up	180.365	98.7186	117.256	255.22	250.268
FBgn0035255	RabX5	-1.69135	0.0292906	370Iso_Up	4.99604	2.02292	3.06976	7.37968	7.51179
FBgn0033205	Rdh1	1.69412	0.000131376	370Grp_Up	15.7503	23.9463	25.2558	6.16191	7.63698
FBgn0038946	rdhB	-2.05417	0.000186774	370Iso_Up	61.4659	12.972	37.7209	87.5332	107.638
FBgn0030362	regucalcin	-1.10064	0.00394014	370Iso_Up	95.2184	59.8785	69.5348	131.178	120.282
FBgn0004795	retn	-1.07115	0.00782153	370Iso_Up	51.69	38.6125	32.9767	73.261	61.9096
FBgn0003248	Rh2	-3.29704	6.59786e-25	370Iso_Up	93.354	15.8547	21.7209	162.694	173.147
FBgn0014019	Rh5	-2.64074	1.6397e-11	370Iso_Up	96.8533	20.1028	37.5348	155.314	174.461
FBgn0019940	Rh6	-1.27802	0.0395642	370Iso_Up	432.74	147.8	384.697	515.14	683.322
FBgn0004400	rhi	-2.32097	0.000115885	370Iso_Up	5.61298	2.30107	1.76744	8.08598	10.2974
FBgn0087005	rtp	-1.20617	0.00157617	370Iso_Up	1179.98	651.786	867.161	1404.82	1796.16
FBgn0029950	rumpel	-1.85199	6.70316e-06	370Iso_Up	17.6954	7.76296	8.83719	27.3267	26.8546
FBgn0034276	Sardh	-1.91853	0.00032056	370Iso_Up	11.4433	6.27106	4.09302	13.2493	22.1598
FBgn0033033	scaf	-1.05973	0.0180241	370Iso_Up	47.1681	34.0862	31.5813	71.3612	51.6435
FBgn0020908	Scp1	-2.52864	2.50195e-12	370Iso_Up	93.9902	37.7781	23.4883	187.682	127.012
FBgn0019929	Ser7	-1.16272	0.00740025	370Iso_Up	35.4371	26.3233	20.6046	39.7967	55.0238
FBgn0035539	slow	-1.94743	1.08101e-05	370Iso_Up	13.5081	7.10551	4.97674	19.947	22.0033
FBgn0027783	SMC2	1.09653	0.0471625	370Grp_Up	14.41	19.9005	20.6046	8.4026	8.73245
FBgn0038257	smp-30	-2.90828	1.45577e-10	370Iso_Up	47.0764	8.97672	14.8372	52.7537	111.738
FBgn0053548	SmydA-8	-1.65662	0.000384508	370Iso_Up	154.481	53.2534	104.837	189.972	269.861
FBgn0039594	snu	-1.39286	0.000103084	370Iso_Up	78.4995	53.1523	40.5116	121.899	98.4357
FBgn0024289	Sodh-1	-3.56658	4.53778e-18	370Iso_Up	71.1271	12.4915	11.6279	75.5991	184.79
FBgn0032451	spict	-1.1813	0.0143569	370Iso_Up	24.0356	13.6042	17.8139	31.735	32.9893
FBgn0003507	srp	-2.34047	0.0338812	370Iso_Up	7.31728	5.00673	0.372092	11.7149	12.1754
FBgn0037684	Srr	-2.19989	0.0120282	370Iso_Up	3.58449	1.84592	0.930231	4.23783	7.32399
FBgn0052667	ssp7	-1.7977	0.00175325	370Iso_Up	18.0637	5.6389	11.5814	22.139	32.8954
FBgn0086408	stl	-1.73015	0.00811814	370Iso_Up	10.122	7.35838	2.88372	15.8797	14.3663
FBgn0086704	stops	-1.19279	0.000381947	370Iso_Up	352.838	240.854	219.116	408.342	543.04
FBgn0038398	sxe2	-2.04453	0.000130553	370Iso_Up	13.0484	7.78825	3.34883	19.8983	21.1582
FBgn0086367	t	-2.5076	4.68801e-15	370Iso_Up	325.274	87.8454	122.651	552.818	537.781
FBgn0023477	Taldo	-1.34693	0.00642263	370Iso_Up	107.426	53.1017	75.6743	102.804	198.123
FBgn0023479	teq	-1.58505	2.62411e-05	370Iso_Up	59.0765	40.0539	24.186	89.9687	82.0976
FBgn0028396	TotA	-1.9536	0.000189882	370Iso_Up	12.7777	5.28488	5.99999	14.0043	25.8218
FBgn0044812	TotC	-2.73117	0.0104084	370Iso_Up	2.21238	0.834455	0.418604	2.55731	5.03916
FBgn0031701	TotM	2.86399	0.00266164	370Grp_Up	6.15064	3.36311	18.4186	0.974215	1.84665
FBgn0027560	Tps1	-1.44879	0.00010968	370Iso_Up	95.4519	54.5683	55.1162	105.8	166.323
FBgn0005614	trpl	-1.59034	6.79163e-08	370Iso_Up	2370.12	1454.13	1107.07	3531.46	3387.85
FBgn0003867	tsl	-2.09874	4.62059e-07	370Iso_Up	19.8914	7.28252	8.97673	26.7178	36.5887
FBgn0031850	Tsp	-1.41293	2.89245e-05	370Iso_Up	54.2035	32.5943	31.1162	77.1091	75.9942
FBgn0033132	Tsp42Ej	-1.24582	0.00166177	370Iso_Up	569.652	293.602	425.441	709.326	850.24
FBgn0026314	Ugt35B1	-1.20119	0.00149831	370Iso_Up	75.7319	44.479	53.6278	100.783	104.038
FBgn0040256	Ugt35C1	-1.60095	0.000173274	370Iso_Up	18.0587	9.9376	9.34882	23.0889	29.8594
FBgn0027070	Ugt36E1	-1.27941	0.04684	370Iso_Up	10.891	8.825	4.88371	13.5172	16.3381
FBgn0083123	Uhg5	1.20316	0.000885683	370Grp_Up	64.5235	93.2314	91.9998	33.0502	39.8125
FBgn0086691	UK114	-2.17744	2.01566e-05	370Iso_Up	11.5805	4.501	4.55813	13.225	24.0377
FBgn0032538	Vajk2	-1.88958	0.00889073	370Iso_Up	22.9285	8.92614	12.279	55.579	14.9297
FBgn0283442	vas	2.82823	0.0150245	370Grp_Up	2.50905	5.91705	3.02325	0.876793	0.219094
FBgn0035704	Vps8	1.17503	0.00409264	370Grp_Up	34.1884	48.6766	49.0232	20.5559	18.4978
FBgn0016076	vri	1.47938	0.000157987	370Grp_Up	34.6179	49.7892	54.7906	18.4614	15.4305
FBgn0260780	wisp	1.91906	0.0167585	370Grp_Up	3.89043	6.14463	6.41859	1.55874	1.43976
FBgn0031902	Wnt6	-1.08573	0.0133355	370Iso_Up	43.3347	36.1597	23.5348	52.4858	61.1585
FBgn0038105	yellow-f2	-2.19667	0.000151845	370Iso_Up	7.5074	3.31253	2.51162	8.96278	15.2427
FBgn0040064	yip2	-1.13313	0.00305422	370Iso_Up	49.6334	33.8587	32.6511	59.5976	72.4261
FBgn0004045	Yp1	-1.93835	0.0076586	370Iso_Up	5.20627	1.77006	2.88372	7.50145	8.66985

## Sheet: DGRP563_GrpVSIso
FlyBase ID	GeneSymbol	log2FC	padj	Remark	Avg.norm.exp	563Grp_1	563Grp_2	563Iso_1	563Iso_2
FBgn0031791	AANATL2	-1.04084	0.0105734	563Iso_Up	8.68082	5.90972	6.97359	12.2936	9.54634
FBgn0010387	Acbp2	-1.37845	9.97956e-10	563Iso_Up	72.5824	43.379	49.0445	104.662	93.2439
FBgn0031703	Acsf2	-1.1926	9.1986e-07	563Iso_Up	22.5439	15.5541	15.7823	29.692	29.1471
FBgn0263120	Acsl	1.41021	5.64633e-07	563Grp_Up	460.872	589.618	816.231	238.261	199.377
FBgn0000045	Act79B	-1.02503	0.0312957	563Iso_Up	155.757	146.553	88.3168	130.941	257.216
FBgn0036623	Agpat3	1.07469	0.000366904	563Grp_Up	109.172	144.665	169.11	72.4026	50.5127
FBgn0261393	alpha-Est5	-1.29563	0.0299624	563Iso_Up	2.79352	1.68263	2.01867	3.8361	3.6367
FBgn0003863	alphaTry	6.84512	1.53241e-11	563Grp_Up	3.96801	4.51437	11.2403	0.0906165	0.0267404
FBgn0003886	alphaTub85E	-3.23765	1.38892e-08	563Iso_Up	2.87717	0.492477	0.82582	4.68185	5.50853
FBgn0035076	Ance-5	1.55923	0.000168663	563Grp_Up	40.6617	50.4789	76.4342	22.6843	13.0493
FBgn0025111	Ant2	-1.62577	0.0109069	563Iso_Up	2.63978	1.84679	1.14697	4.41	3.15537
FBgn0026268	Antdh	-1.60807	0.000421747	563Iso_Up	37.4194	13.2558	29.0413	52.1347	55.2458
FBgn0267408	AOX1	1.97716	1.18119e-10	563Grp_Up	220.112	280.917	446.356	79.3196	73.8571
FBgn0032136	Apoltp	1.4853	5.01983e-06	563Grp_Up	225.922	276.895	420.342	116.684	89.7677
FBgn0033807	AQP	-1.01792	0.000191748	563Iso_Up	20.3152	14.6101	15.8741	26.309	24.4675
FBgn0033926	Arc1	1.05538	0.000113383	563Grp_Up	581.657	987.909	683.228	291.392	364.098
FBgn0034817	Art7	1.22782	4.00789e-06	563Grp_Up	19.3712	29.0972	28.2614	10.874	9.25219
FBgn0051144	asRNA:CR31144	5.68739	0.000620777	563Grp_Up	1.32871	0.410397	4.81728	0.060411	0.0267404
FBgn0262107	asRNA:CR42860	-1.56171	0.000159781	563Iso_Up	5.28088	3.24214	2.93625	6.73582	8.20932
FBgn0264821	asRNA:CR44029	-1.19891	0.0174707	563Iso_Up	7.19804	3.69358	6.23953	9.15226	9.70678
FBgn0264874	asRNA:CR44065	-1.75109	0.00815215	563Iso_Up	2.66446	0.984954	1.83515	3.98712	3.85062
FBgn0264986	asRNA:CR44137	1.06057	0.0108574	563Grp_Up	5.97188	8.70043	8.44171	3.3226	3.42278
FBgn0265070	asRNA:CR44181	1.42134	0.00616547	563Grp_Up	7.28216	8.29003	13.9472	3.89651	2.99493
FBgn0266406	asRNA:CR45046	-2.83573	0.000658296	563Iso_Up	1.5844	0.328318	0.596425	1.96336	3.44952
FBgn0266637	asRNA:CR45144	-6.64733	0.000535296	563Iso_Up	0.907502	0	0.0458789	1.87274	1.71139
FBgn0267161	asRNA:CR45601	-5.15551	5.14589e-18	563Iso_Up	7.10587	0.574556	0.367031	8.09507	19.3868
FBgn0267189	asRNA:CR45629	-7.75194	8.72875e-05	563Iso_Up	0.70576	0	0	1.29884	1.52421
FBgn0267966	asRNA:CR46246	-1.95195	0.0253908	563Iso_Up	1.27254	0.574556	0.642304	2.29562	1.57769
FBgn0287602	asRNA:CR46471	-1.91766	0.00624102	563Iso_Up	5.84219	1.31327	4.31261	9.21267	8.5302
FBgn0039830	ATPsynC	-1.06615	2.97365e-09	563Iso_Up	2141.87	1685.5	1469.59	2621.44	2790.95
FBgn0028342	ATPsyndelta	-1.14334	4.73768e-07	563Iso_Up	239.678	156.731	183.24	298.068	320.671
FBgn0010612	ATPsynG	-1.00626	1.74897e-06	563Iso_Up	267.056	193.133	209.575	319.363	346.155
FBgn0024897	b6	1.47053	0.0043596	563Grp_Up	3.58901	5.9918	5.09256	1.48007	1.79161
FBgn0033778	Balat	2.60984	1.9571e-05	563Grp_Up	3.40935	4.43229	7.57001	0.966576	0.668511
FBgn0010357	betaTry	4.27569	0.00806984	563Grp_Up	0.712293	0.984954	1.7434	0.120822	0
FBgn0027348	bgm	-1.49479	0.00205322	563Iso_Up	39.2974	15.7593	31.1976	68.8383	41.3942
FBgn0036449	bmm	-1.00987	0.00105392	563Iso_Up	54.9009	43.0097	39.7311	82.0985	54.7644
FBgn0040582	BomBc3	-1.52478	0.00190697	563Iso_Up	41.9197	14.9385	34.3633	66.8749	51.5021
FBgn0034329	BomS1	-1.63458	0.000230702	563Iso_Up	34.7899	12.435	26.3804	52.1045	48.2398
FBgn0040734	BomS5	-1.88666	0.00728051	563Iso_Up	5.14005	1.27223	3.76207	9.00124	6.52467
FBgn0040735	BomT2	-2.01176	0.00215733	563Iso_Up	10.2976	2.25719	7.1571	19.4221	12.3541
FBgn0038930	BomT3	-1.74046	7.33691e-07	563Iso_Up	124.489	50.0685	81.8938	211.861	154.132
FBgn0027843	CAH2	-1.20569	1.32392e-09	563Iso_Up	103.62	73.297	69.9194	144.835	126.429
FBgn0040629	CAH5	8.07599	1.11276e-34	563Grp_Up	16.4611	40.8756	24.7746	0.060411	0.133702
FBgn0039486	CAH9	-1.72936	7.98516e-10	563Iso_Up	24.6128	15.0205	11.5156	31.3231	40.592
FBgn0000261	Cat	-1.28534	7.20384e-13	563Iso_Up	295.919	214.351	180.717	396.326	392.282
FBgn0038147	CCHa2	-1.37172	0.00135021	563Iso_Up	45.0785	19.576	37.6207	67.8717	55.2458
FBgn0038865	cDIP	1.06702	0.0142946	563Grp_Up	22.357	30.2053	33.9504	16.3412	8.93131
FBgn0000276	CecA1	-3.79099	2.60618e-07	563Iso_Up	2.58248	0.697676	0.137637	5.37658	4.11803
FBgn0000277	CecA2	-2.76875	0.000228743	563Iso_Up	1.43235	0.410397	0.458789	2.50706	2.35316
FBgn0036367	CG10116	3.50228	0.00557319	563Grp_Up	0.745266	1.35431	1.42225	0.151027	0.0534809
FBgn0039094	CG10184	-1.58708	0.000123981	563Iso_Up	25.2649	10.3831	18.5351	40.9888	31.1526
FBgn0038394	CG10264	1.81435	0.000750133	563Grp_Up	15.9929	18.1806	33.5375	8.21589	4.03781
FBgn0039324	CG10553	-2.6535	1.4226e-38	563Iso_Up	58.1297	21.2996	16.5164	97.02	97.6828
FBgn0039325	CG10560	-2.27699	9.82384e-07	563Iso_Up	6.57048	3.57046	1.7434	9.12206	11.846
FBgn0032726	CG10621	-4.2232	8.60958e-25	563Iso_Up	27.1888	2.05199	4.54201	60.0183	42.1429
FBgn0034295	CG10911	7.94898	6.56144e-06	563Grp_Up	2.1449	4.14501	4.40437	0.0302055	0
FBgn0034296	CG10912	5.18665	0.00272549	563Grp_Up	0.658524	1.51847	1.05521	0.060411	0
FBgn0030073	CG10962	-1.76497	0.0340629	563Iso_Up	2.64182	0.697676	2.06455	4.16836	3.6367
FBgn0031735	CG11029	2.72391	0.00185032	563Grp_Up	1.43607	2.62654	2.47746	0.453082	0.187183
FBgn0031741	CG11034	1.45788	0.0158075	563Grp_Up	4.03505	6.03284	6.37716	2.44664	1.28354
FBgn0039244	CG11069	-1.02888	0.0191414	563Iso_Up	6.03534	4.10397	4.90904	7.40034	7.72799
FBgn0039241	CG11089	-2.64621	0.0105289	563Iso_Up	158.119	45.5131	56.798	405.901	124.263
FBgn0034198	CG11400	-1.32991	0.00404257	563Iso_Up	26.0324	11.2039	22.4806	38.0891	32.3559
FBgn0024366	CG11409	1.06928	0.0432151	563Grp_Up	3.89121	5.54037	5.6431	2.29562	2.08575
FBgn0037166	CG11426	-2.05896	6.89931e-22	563Iso_Up	295.952	148.974	119.377	511.167	404.289
FBgn0035359	CG1143	1.00178	3.859e-05	563Grp_Up	24.5307	36.4843	33.1245	14.5288	13.9853
FBgn0037162	CG11449	-2.46781	0.00291476	563Iso_Up	1.2037	0.410397	0.458789	1.99356	1.95205
FBgn0038113	CG11668	-1.35868	0.000309026	563Iso_Up	9.02317	6.27908	5.36783	10.3001	14.1457
FBgn0039271	CG11839	-1.29058	0.00161075	563Iso_Up	15.8408	13.9946	7.20298	22.1104	20.0553
FBgn0035234	CG12003	6.54736	0.0112438	563Grp_Up	0.782997	0.123119	2.98213	0	0.0267404
FBgn0037974	CG12224	-1.28911	0.0433474	563Iso_Up	7.20819	3.03694	6.46892	11.5989	7.72799
FBgn0029810	CG12239	1.4507	3.07863e-10	563Grp_Up	1323.32	2420.48	1656.41	608.459	607.917
FBgn0038002	CG12256	1.90758	0.0264247	563Grp_Up	1.72152	1.96991	3.67031	0.60411	0.641771
FBgn0037796	CG12814	-1.00476	0.000342973	563Iso_Up	29.6445	26.3475	18.5809	37.8173	35.8322
FBgn0033501	CG12911	1.8699	0.0152227	563Grp_Up	2.81143	6.32012	2.89037	0.724932	1.31028
FBgn0030859	CG12990	5.57724	8.42383e-08	563Grp_Up	2.10694	5.95076	2.33982	0.0302055	0.106962
FBgn0030769	CG13012	-1.15054	0.008251	563Iso_Up	13.2186	8.86458	9.86396	12.8071	21.3389
FBgn0040751	CG13018	-1.06547	0.0455742	563Iso_Up	7.16873	4.47333	6.05601	7.12849	11.0171
FBgn0036679	CG13022	-1.79086	0.000820942	563Iso_Up	3.2402	1.39535	1.97279	4.83288	4.7598
FBgn0036656	CG13026	-2.44496	3.69068e-06	563Iso_Up	3.64887	1.80575	0.871699	6.22233	5.69571
FBgn0036589	CG13067	-1.76032	2.49334e-08	563Iso_Up	10.9741	6.77156	4.86316	17.1265	15.1351
FBgn0035921	CG13305	-1.84184	5.8792e-07	563Iso_Up	14.1239	7.09988	7.20298	26.309	15.8838
FBgn0037627	CG13318	2.33379	1.42079e-32	563Grp_Up	111.498	182.996	200.399	31.4439	31.1526
FBgn0025620	CG13360	-3.60632	1.13547e-20	563Iso_Up	62.8664	16.6621	6.5148	105.176	123.113
FBgn0014417	CG13397	1.0408	0.000183116	563Grp_Up	23.0207	31.3544	34.4092	14.0456	12.2739
FBgn0034662	CG13492	6.66411	0.00895546	563Grp_Up	0.323525	0.697676	0.596425	0	0
FBgn0039203	CG13618	1.01752	0.000582638	563Grp_Up	16.6253	26.7169	20.6455	9.72617	9.41264
FBgn0039239	CG13641	-2.03316	0.0112552	563Iso_Up	1.94309	0.533517	1.23873	3.35281	2.6473
FBgn0030539	CG1368	-2.608	0.022297	563Iso_Up	0.713375	0.246238	0.229394	1.14781	1.23006
FBgn0031937	CG13795	-1.65712	0.00149835	563Iso_Up	9.66613	3.89878	6.79007	17.7608	10.2148
FBgn0038959	CG13856	-1.71444	1.37561e-07	563Iso_Up	15.4033	6.93572	9.68044	23.0166	21.9806
FBgn0035186	CG13912	-1.71955	0.0483316	563Iso_Up	5.33047	1.31327	4.35849	10.7834	4.86676
FBgn0031700	CG14022	-1.76233	5.12369e-09	563Iso_Up	20.2363	9.89058	11.4697	25.7049	33.8801
FBgn0036364	CG14109	-1.26273	1.2282e-06	563Iso_Up	53.874	34.3503	38.1253	63.2805	79.74
FBgn0036094	CG14153	-1.31779	0.000512415	563Iso_Up	7.94421	5.04789	5.36783	12.0822	9.27893
FBgn0040608	CG14246	-1.61605	0.00236943	563Iso_Up	5.08454	3.93982	1.88103	6.73582	7.78147
FBgn0038654	CG14298	-1.26604	0.0182698	563Iso_Up	22.3198	8.9877	20.7373	28.0005	31.5537
FBgn0038629	CG14304	-1.70602	2.88587e-11	563Iso_Up	52.7805	28.6868	28.7202	65.3647	88.3504
FBgn0038526	CG14327	-2.91754	7.1807e-05	563Iso_Up	1.57357	0.369358	0.504668	2.96014	2.46012
FBgn0038148	CG14377	-1.84341	0.0395279	563Iso_Up	1.18387	0.697676	0.504668	1.6613	1.87183
FBgn0033464	CG1441	-1.21923	0.000494642	563Iso_Up	18.5154	12.8865	12.5249	29.4503	19.1996
FBgn0030157	CG1468	-1.33466	0.00488032	563Iso_Up	37.7147	15.4309	33.2163	53.4637	48.7478
FBgn0023513	CG14803	1.35476	2.17175e-06	563Grp_Up	13.6685	20.3147	21.0584	6.85665	6.44445
FBgn0035734	CG14823	-1.26658	0.000717435	563Iso_Up	45.5208	22.6129	38.1712	62.0421	59.2568
FBgn0040699	CG15024	6.83912	0.0050793	563Grp_Up	0.365775	0.820795	0.642304	0	0
FBgn0034390	CG15093	-2.17469	4.63715e-12	563Iso_Up	28.3189	10.7114	13.259	53.3127	35.9926
FBgn0030271	CG15202	-1.05937	0.00191475	563Iso_Up	12.7047	10.6293	8.16644	14.3476	17.6754
FBgn0040850	CG15210	-1.13497	0.00318771	563Iso_Up	9.14394	7.0178	6.05601	9.99802	13.5039
FBgn0030234	CG15211	-1.41867	1.30772e-06	563Iso_Up	18.4879	11.0397	12.0661	28.5442	22.3015
FBgn0040718	CG15353	-1.33893	0.00592752	563Iso_Up	8.5367	7.55131	3.62443	10.9646	12.0065
FBgn0031373	CG15358	12.3151	7.00777e-15	563Grp_Up	16.2048	31.97	32.8493	0	0
FBgn0030104	CG15368	-1.36242	0.037297	563Iso_Up	3.89227	1.72367	3.2574	4.65164	5.93638
FBgn0031460	CG15399	-1.73284	0.00210229	563Iso_Up	3.40583	1.39535	2.24806	4.71206	5.26787
FBgn0031580	CG15423	4.68845	0.0195983	563Grp_Up	0.449173	0.779755	0.963456	0	0.0534809
FBgn0039719	CG15515	-2.30163	0.000200867	563Iso_Up	2.32271	0.738715	1.10109	3.41322	4.03781
FBgn0039742	CG15528	-1.48945	1.74578e-08	563Iso_Up	19.9275	13.6252	10.5521	26.2788	29.254
FBgn0039755	CG15531	9.31177	4.69546e-06	563Grp_Up	34.4229	64.1041	73.4062	0.181233	0
FBgn0039782	CG15539	1.2825	0.045701	563Grp_Up	2.97106	3.73462	5.13843	1.54048	1.47072
FBgn0039807	CG15546	-1.27425	9.47844e-05	563Iso_Up	13.8633	10.8345	7.79941	16.764	20.0553
FBgn0031630	CG15629	-1.82578	5.99268e-10	563Iso_Up	13.6782	8.20795	5.82662	19.6336	21.0447
FBgn0030027	CG1632	-1.16742	0.00157608	563Iso_Up	31.9515	24.5007	20.462	52.2253	30.6178
FBgn0030482	CG1673	-2.20728	4.69546e-06	563Iso_Up	32.8208	15.0616	12.3414	75.9366	27.9438
FBgn0032322	CG16743	-1.9091	3.34727e-09	563Iso_Up	12.3108	6.6074	5.45959	21.5063	15.6699
FBgn0029765	CG16756	-2.48382	3.30068e-06	563Iso_Up	14.6574	2.91382	7.43238	29.7524	18.5311
FBgn0032495	CG16820	-1.78964	6.32035e-08	563Iso_Up	8.10291	4.59645	3.85383	12.8373	11.124
FBgn0032505	CG16826	6.68897	6.00816e-46	563Grp_Up	15.3875	30.0821	30.9682	0.392671	0.106962
FBgn0037763	CG16904	7.18471	9.0971e-05	563Grp_Up	25.2315	53.9262	46.4294	0.543699	0.0267404
FBgn0032387	CG16965	1.16166	0.00140475	563Grp_Up	11.6844	15.472	18.6727	6.97747	5.61549
FBgn0032109	CG17005	-1.08475	0.0243675	563Iso_Up	5.07448	3.69358	3.71619	5.58802	7.30014
FBgn0032299	CG17127	-2.28698	0.000100016	563Iso_Up	8.90974	5.37621	1.83515	10.5115	17.9161
FBgn0039485	CG17189	1.20932	0.00168752	563Grp_Up	8.23706	11.1218	13.1672	4.62144	4.03781
FBgn0038761	CG17190	-1.04273	0.0134787	563Iso_Up	12.9197	12.1478	7.1571	14.3778	17.9963
FBgn0032414	CG17211	-1.62109	6.04404e-07	563Iso_Up	34.4796	22.1204	17.0669	60.6526	38.0784
FBgn0031490	CG17264	1.66334	1.52075e-06	563Grp_Up	12.2671	22.736	16.287	4.34959	5.69571
FBgn0038450	CG17560	5.77272	4.49052e-08	563Grp_Up	1.95505	4.35021	3.34916	0.120822	0
FBgn0039856	CG1774	-1.47732	0.00146693	563Iso_Up	18.74	7.42819	15.1859	26.7017	25.6441
FBgn0040900	CG17777	-1.57528	4.76638e-05	563Iso_Up	5.49558	3.44734	2.93625	8.00445	7.59429
FBgn0031171	CG1801	6.64481	0.0145816	563Grp_Up	0.312684	0.287278	0.963456	0	0
FBgn0036837	CG18135	1.75367	7.48258e-10	563Grp_Up	464.792	603.613	888.995	192.318	174.241
FBgn0037553	CG18249	1.33404	0.0337557	563Grp_Up	9.51171	10.342	18.2598	6.34315	3.10189
FBgn0033431	CG1827	1.15977	8.59308e-06	563Grp_Up	29.2246	41.6143	43.8143	17.2171	14.2527
FBgn0033683	CG18343	-1.35291	0.000220326	563Iso_Up	7.01586	4.51437	4.54201	10.2095	8.79761
FBgn0037973	CG18547	-1.62105	0.00138674	563Iso_Up	14.7765	6.64844	10.0016	28.6046	13.8516
FBgn0034382	CG18609	3.48749	3.66366e-09	563Grp_Up	2.59707	5.04789	4.63377	0.33226	0.374366
FBgn0026563	CG1979	-3.32511	8.58931e-07	563Iso_Up	7.29637	0.697676	2.43158	8.48774	17.5685
FBgn0030251	CG2145	1.43184	1.90618e-05	563Grp_Up	132.951	173.311	233.661	75.6043	49.2292
FBgn0039663	CG2321	1.36759	0.0314827	563Grp_Up	2.55227	3.6115	4.1291	1.23842	1.23006
FBgn0037518	CG2641	-1.30699	0.0202787	563Iso_Up	2.87755	2.01095	1.78928	3.80589	3.9041
FBgn0037537	CG2767	-1.21738	1.34251e-08	563Iso_Up	109.545	71.204	79.1411	149.185	138.649
FBgn0014930	CG2846	-1.05056	0.000997411	563Iso_Up	38.6758	24.0903	32.9869	46.1238	51.5021
FBgn0050008	CG30008	5.57319	9.01946e-65	563Grp_Up	20.6281	41.7374	39.3641	0.875959	0.534809
FBgn0050033	CG30033	-1.00111	0.037297	563Iso_Up	46.5219	49.7402	21.2878	59.8673	55.1923
FBgn0050050	CG30050	-1.68597	0.0011982	563Iso_Up	3.88241	1.68263	2.56922	5.76925	5.50853
FBgn0050148	CG30148	-1.85968	0.0119456	563Iso_Up	2.65046	0.902874	1.7434	5.01411	2.94145
FBgn0031645	CG3036	-1.20375	0.00198721	563Iso_Up	84.5258	49.2477	67.0749	139.821	81.9595
FBgn0050384	CG30384	2.24498	1.21461e-06	563Grp_Up	3.94852	7.55131	5.91837	1.14781	1.17658
FBgn0050411	CG30411	-1.31024	0.0220317	563Iso_Up	2.96079	2.25719	1.65164	3.89651	4.03781
FBgn0051104	CG31104	-2.74255	0.0001656	563Iso_Up	1.65902	0.656636	0.367031	2.53726	3.07515
FBgn0051198	CG31198	6.25853	0.0030221	563Grp_Up	0.670911	1.23119	1.42225	0.0302055	0
FBgn0051300	CG31300	-1.70983	6.41547e-10	563Iso_Up	22.7811	14.7743	10.0475	32.048	34.2545
FBgn0051326	CG31326	1.33755	4.89753e-05	563Grp_Up	121.219	145.281	219.852	66.2104	53.5344
FBgn0051445	CG31445	1.20147	0.000275737	563Grp_Up	33.38	45.5952	52.6689	21.0834	14.1724
FBgn0051516	CG31516	1.96716	0.0328919	563Grp_Up	4.91289	10.4241	5.82662	2.83932	0.561549
FBgn0051676	CG31676	-1.43129	2.95513e-09	563Iso_Up	43.9634	31.8058	23.0771	62.6764	58.2942
FBgn0028490	CG31705	1.44861	5.24312e-09	563Grp_Up	412.396	602.135	664.923	220.319	162.208
FBgn0051777	CG31777	-1.7388	0.0204992	563Iso_Up	5.24432	1.27223	4.26674	8.00445	7.43384
FBgn0051778	CG31778	-1.1896	0.0415333	563Iso_Up	9.02226	5.58141	6.92771	16.0391	7.54081
FBgn0052191	CG32191	1.26375	0.00838185	563Grp_Up	11.8494	13.3379	21.8842	7.06808	5.10742
FBgn0052260	CG32260	1.41241	0.000993068	563Grp_Up	5.34778	9.06978	7.29474	2.32582	2.70078
FBgn0052267	CG32267	-1.05842	0.000366745	563Iso_Up	17.9445	12.5171	13.9472	21.1136	24.2001
FBgn0052271	CG32271	1.10439	0.00621943	563Grp_Up	18.1856	20.9713	31.5647	9.24288	10.9636
FBgn0043783	CG32444	-1.66579	2.05661e-05	563Iso_Up	120.826	45.1848	87.5828	187.153	163.384
FBgn0031538	CG3246	1.14549	0.0273278	563Grp_Up	67.8538	62.3804	134.7	43.5563	30.7783
FBgn0052523	CG32523	-1.09403	0.0001016	563Iso_Up	192.156	168.181	112.403	219.352	268.688
FBgn0052695	CG32695	-1.58209	0.0064184	563Iso_Up	9.4797	3.28318	7.57001	15.8881	11.1775
FBgn0052816	CG32816	-1.37011	0.0085118	563Iso_Up	6.74348	3.03694	5.55134	9.45432	8.93131
FBgn0053296	CG33296	-1.21952	0.00612212	563Iso_Up	5.75533	4.71957	3.21152	7.06808	8.02213
FBgn0053307	CG33307	-1.57283	0.00797476	563Iso_Up	7.56976	2.74966	5.96425	12.9279	8.63716
FBgn0040609	CG3348	-1.95594	0.00160646	563Iso_Up	2.19012	0.943914	1.14697	3.59445	3.07515
FBgn0053493	CG33493	-1.63487	4.45963e-06	563Iso_Up	16.5658	8.08483	10.5063	28.1515	19.5205
FBgn0250819	CG33521	-1.0723	5.50273e-05	563Iso_Up	87.2674	66.074	62.0741	93.637	127.285
FBgn0054034	CG34034	-3.22788	0.0332936	563Iso_Up	0.467444	0.123119	0.0917577	0.906165	0.748732
FBgn0054054	CG34054	-1.65116	0.000490951	563Iso_Up	5.11586	2.25719	3.44092	7.7326	7.03274
FBgn0083968	CG34132	-1.01311	0.00440912	563Iso_Up	12.9742	11.409	8.16644	17.8816	14.4398
FBgn0083974	CG34138	-1.52017	0.00770911	563Iso_Up	2.81641	1.51847	1.83515	4.16836	3.74366
FBgn0085195	CG34166	-2.44752	0.0437272	563Iso_Up	111.192	16.8673	62.7623	190.657	174.481
FBgn0085334	CG34305	-1.64029	0.0153459	563Iso_Up	3.10466	2.50342	1.00934	4.44021	4.46565
FBgn0085360	CG34331	-1.58693	2.02052e-05	563Iso_Up	17.9831	8.24899	12.3873	29.2087	22.0876
FBgn0085491	CG34462	-8.10876	2.58854e-06	563Iso_Up	2.46709	0	0.0458789	3.80589	6.0166
FBgn0031559	CG3513	-2.75407	0.00938357	563Iso_Up	0.92943	0.246238	0.321152	2.05397	1.09636
FBgn0029648	CG3603	-1.71456	0.00875251	563Iso_Up	9.05952	2.66758	7.01947	16.764	9.787
FBgn0031562	CG3604	1.84786	0.0194302	563Grp_Up	3.05763	5.12997	4.81728	1.72171	0.561549
FBgn0031418	CG3609	-1.32903	0.000366904	563Iso_Up	71.2695	34.3092	58.0827	105.78	86.9064
FBgn0040349	CG3699	-1.85033	6.04404e-07	563Iso_Up	14.9007	6.4022	8.57935	26.7319	17.8894
FBgn0034796	CG3700	1.6782	1.44841e-08	563Grp_Up	54.1387	70.8756	101.209	21.6875	22.7829
FBgn0040342	CG3706	1.55589	0.0285575	563Grp_Up	2.43856	4.84269	2.79861	0.93637	1.17658
FBgn0029863	CG3823	-1.32381	3.06975e-06	563Iso_Up	15.4939	9.52122	10.7357	21.4761	20.2425
FBgn0036824	CG3902	-1.48574	5.40105e-08	563Iso_Up	139.068	72.9276	94.9234	216.211	172.208
FBgn0040396	CG3939	-1.05904	0.000309026	563Iso_Up	17.9997	13.5021	13.0755	20.4189	25.0023
FBgn0038820	CG4000	-2.25971	3.44683e-09	563Iso_Up	183.24	102.969	47.1635	346.578	236.252
FBgn0058298	CG40298	-2.30838	9.56996e-06	563Iso_Up	3.10339	1.35431	1.10109	4.28918	5.66897
FBgn0069973	CG40485	-1.59211	1.25802e-15	563Iso_Up	131.532	79.6171	71.8463	204.25	170.417
FBgn0069923	CG41128	-1.09991	0.0220162	563Iso_Up	20.8136	10.4651	19.4985	23.9832	29.3075
FBgn0259167	CG42272	-1.08184	0.0473728	563Iso_Up	4.8054	2.91382	4.08322	6.79623	5.42831
FBgn0259219	CG42319	-1.24637	6.1582e-06	563Iso_Up	133.193	109.535	72.1216	160.029	191.087
FBgn0259223	CG42323	4.35072	0.000639954	563Grp_Up	1.43327	0.779755	4.72552	0.120822	0.106962
FBgn0034761	CG4250	-1.39948	9.82862e-09	563Iso_Up	48.9049	36.3202	25.6922	67.2374	66.3698
FBgn0264979	CG4267	1.4421	0.000191748	563Grp_Up	37.6715	43.2969	72.1216	19.7846	15.4827
FBgn0262150	CG42876	-1.72502	0.0448386	563Iso_Up	3.77919	0.943914	3.07388	7.00767	4.09129
FBgn0262481	CG43071	-3.27113	0.00741494	563Iso_Up	1.41618	0.123119	0.504668	4.04754	0.989396
FBgn0262531	CG43085	-2.16524	0.00149475	563Iso_Up	1.72918	0.697676	0.779941	2.65808	2.78101
FBgn0262537	CG43091	-1.242	0.0450455	563Iso_Up	5.35616	2.42134	4.81728	6.64521	7.54081
FBgn0262539	CG43093	-1.61244	4.10409e-05	563Iso_Up	9.48008	4.39125	6.37716	12.4447	14.7072
FBgn0262563	CG43103	-1.28701	0.000152279	563Iso_Up	10.8146	6.73052	7.66177	13.1696	15.6966
FBgn0262574	CG43114	-2.51062	0.000165895	563Iso_Up	3.69918	0.656636	1.92691	6.46397	5.7492
FBgn0026878	CG4325	-2.2204	0.000320856	563Iso_Up	2.88069	0.820795	1.55988	4.16836	4.97372
FBgn0263004	CG43312	-6.25475	0.0217436	563Iso_Up	0.249327	0	0	0.302055	0.695252
FBgn0038795	CG4335	-1.86256	0.000212998	563Iso_Up	5.18847	1.96991	3.21152	8.94082	6.63163
FBgn0263083	CG43351	-2.14867	0.0353518	563Iso_Up	1.79029	0.287278	1.23873	3.20178	2.43338
FBgn0034663	CG4363	4.43118	0.00042036	563Grp_Up	0.987244	2.74966	1.05521	0.0906165	0.0534809
FBgn0264489	CG43897	-1.09569	1.50112e-08	563Iso_Up	397.293	293.721	283.302	474.8	537.349
FBgn0035982	CG4461	-2.12881	1.52553e-07	563Iso_Up	46.2857	13.7894	26.1968	59.9881	85.1683
FBgn0035969	CG4476	-1.45821	0.0234801	563Iso_Up	2.2281	1.31327	1.42225	3.26219	2.91471
FBgn0038738	CG4572	1.51002	2.32867e-06	563Grp_Up	74.7548	102.476	129.287	40.5962	26.6602
FBgn0031306	CG4577	1.00108	3.64156e-06	563Grp_Up	837.032	1355.75	1021.63	504.341	466.407
FBgn0029924	CG4586	1.37627	0.00938357	563Grp_Up	4.56831	5.74556	8.12056	2.05397	2.35316
FBgn0036620	CG4842	-1.0437	6.47552e-08	563Iso_Up	93.4483	72.1068	66.7996	114.207	120.68
FBgn0034139	CG4927	1.56267	0.0251559	563Grp_Up	2.61074	3.93982	4.22086	1.48007	0.802213
FBgn0034275	CG5002	1.81654	1.52712e-11	563Grp_Up	19.7956	34.063	30.1883	6.615	8.31628
FBgn0031313	CG5080	1.1771	0.000203365	563Grp_Up	230.179	269.385	404.468	128.857	118.006
FBgn0039341	CG5112	1.19911	6.0608e-09	563Grp_Up	83.7291	120.411	126.167	45.8217	42.5173
FBgn0031908	CG5177	-1.32461	9.70594e-06	563Iso_Up	79.5213	47.4419	56.431	88.5323	125.68
FBgn0032431	CG5435	2.5737	0.0378795	563Grp_Up	0.70711	1.47743	1.00934	0.181233	0.160443
FBgn0034364	CG5493	-1.97029	0.00090342	563Iso_Up	16.9824	4.22709	11.6532	32.7427	19.3066
FBgn0039529	CG5612	-1.18253	5.8962e-07	563Iso_Up	38.6173	28.933	25.0957	46.1842	54.2564
FBgn0038858	CG5793	-1.09146	0.0038812	563Iso_Up	38.111	21.2996	33.8127	52.6482	44.6833
FBgn0038897	CG5849	1.37348	0.00134112	563Grp_Up	9.90845	12.1888	17.8469	5.34637	4.25173
FBgn0036997	CG5955	-1.39339	0.00124253	563Iso_Up	19.8499	10.7114	14.3142	34.8269	19.5473
FBgn0037807	CG6293	-1.12226	0.00895546	563Iso_Up	11.4981	9.02874	7.47826	18.3347	11.1508
FBgn0039471	CG6295	5.72546	0.0180637	563Grp_Up	0.462083	0.533517	1.28461	0.0302055	0
FBgn0036106	CG6409	1.80897	2.03294e-15	563Grp_Up	573.526	1102.49	758.515	207.995	225.101
FBgn0040606	CG6503	-2.32877	0.011484	563Iso_Up	137.478	30.5336	75.1955	262.214	181.969
FBgn0033880	CG6553	1.57749	0.00403067	563Grp_Up	3.92989	5.33517	6.97359	1.99356	1.41724
FBgn0039030	CG6660	6.0033	4.99725e-21	563Grp_Up	5.05506	9.68538	10.2769	0.151027	0.106962
FBgn0039052	CG6733	6.30205	0.00265472	563Grp_Up	0.695642	1.55951	1.19285	0.0302055	0
FBgn0038070	CG6753	-1.86622	0.00528311	563Iso_Up	1.91541	0.861835	1.05521	2.99034	2.75427
FBgn0032652	CG6870	-1.70577	2.98247e-18	563Iso_Up	111.477	58.5637	62.487	168.879	155.977
FBgn0036262	CG6910	-1.49005	7.11408e-05	563Iso_Up	201.523	93.4065	148.556	342.077	222.053
FBgn0029733	CG6927	-6.1279	0.0260527	563Iso_Up	0.229516	0	0	0.543699	0.374366
FBgn0038952	CG7069	-1.35747	0.000461779	563Iso_Up	7.59829	5.45829	4.35849	8.97103	11.6054
FBgn0031942	CG7203	-1.90939	1.16374e-06	563Iso_Up	254.967	98.0029	149.703	502.861	269.303
FBgn0031940	CG7214	-3.71914	5.3594e-41	563Iso_Up	148.024	30.3284	20.0491	321.99	219.726
FBgn0031970	CG7227	2.23431	0.000295882	563Grp_Up	5.55043	6.07388	12.8002	1.26863	2.05901
FBgn0036501	CG7272	-1.50614	4.00587e-12	563Iso_Up	51.8293	31.6416	30.6012	66.9656	78.1088
FBgn0030968	CG7322	-1.40887	0.000658296	563Iso_Up	26.222	12.1888	20.5537	41.9554	30.19
FBgn0032271	CG7329	4.4891	0.00703198	563Grp_Up	0.618405	1.19015	1.19285	0.0906165	0
FBgn0036768	CG7402	-1.06014	0.0187029	563Iso_Up	5.30229	3.77566	4.03734	7.21911	6.17704
FBgn0035817	CG7409	-2.36409	2.91639e-18	563Iso_Up	54.349	18.8372	22.6642	74.7888	101.106
FBgn0036742	CG7497	-1.3043	2.09168e-05	563Iso_Up	14.3664	8.57731	10.3686	18.9993	19.5205
FBgn0035805	CG7506	-1.00641	0.00114799	563Iso_Up	16.5098	13.5021	11.4697	18.3649	22.7026
FBgn0038256	CG7530	-1.05221	0.000812498	563Iso_Up	40.8717	26.2244	34.0421	57.3602	45.8599
FBgn0030990	CG7556	1.25515	1.72255e-10	563Grp_Up	83.8331	127.593	121.9	45.2478	40.592
FBgn0036714	CG7692	1.15257	6.38672e-05	563Grp_Up	29.0391	50.2737	34.6844	16.2506	14.9479
FBgn0034447	CG7744	1.66624	0.00174026	563Grp_Up	4.84635	6.93572	8.44171	2.53726	1.47072
FBgn0030658	CG7872	1.11543	2.09067e-06	563Grp_Up	30.6223	43.7894	45.0072	17.2473	16.4454
FBgn0033048	CG7881	1.40557	0.0128914	563Grp_Up	3.62654	6.68948	4.40437	1.54048	1.87183
FBgn0037547	CG7910	9.19825	6.95644e-129	563Grp_Up	137.113	237.21	310.462	0.513493	0.267404
FBgn0038115	CG7966	-1.11496	0.000212677	563Iso_Up	18.446	13.1327	13.3966	26.611	20.6436
FBgn0034117	CG7997	1.10517	0.0226327	563Grp_Up	35.1549	33.9399	67.4419	21.2949	17.9428
FBgn0040832	CG8012	-1.6354	2.35682e-06	563Iso_Up	10.4178	7.14092	4.63377	15.8579	14.0387
FBgn0037687	CG8132	-1.16651	0.00897113	563Iso_Up	6.95725	4.26813	5.50546	7.97425	10.0811
FBgn0033365	CG8170	-1.28626	0.0267696	563Iso_Up	3.64689	3.03694	1.83515	5.43699	4.27847
FBgn0035711	CG8519	-1.39788	0.0113795	563Iso_Up	9.89966	5.04789	7.43238	9.12206	17.9963
FBgn0035791	CG8539	-1.23124	2.63592e-05	563Iso_Up	14.6222	9.35706	10.598	19.1201	19.4136
FBgn0033320	CG8586	1.95147	5.57217e-08	563Grp_Up	252.037	293.598	536.141	96.9596	81.4514
FBgn0033312	CG8642	2.85048	0.000759628	563Grp_Up	2.04247	4.22709	3.11976	0.181233	0.641771
FBgn0033763	CG8646	1.50784	0.000191748	563Grp_Up	6.02444	8.78251	9.90984	2.59767	2.80775
FBgn0034479	CG8654	1.91999	1.18959e-06	563Grp_Up	33.9574	47.483	63.9552	15.8881	8.50346
FBgn0033717	CG8839	1.53965	6.15049e-17	563Grp_Up	138.1	219.398	211.318	64.0054	57.6791
FBgn0033702	CG8854	-1.73838	0.000368284	563Iso_Up	5.16557	2.25719	3.2574	6.40356	8.74413
FBgn0030617	CG9095	-1.74602	0.00731239	563Iso_Up	6.90284	5.74556	1.69752	10.5417	9.62656
FBgn0030628	CG9114	2.06721	1.9571e-05	563Grp_Up	3.56632	6.23804	5.68898	1.26863	1.06962
FBgn0035189	CG9119	-1.41038	0.000587707	563Iso_Up	49.7676	21.8331	40.1899	76.4803	60.5671
FBgn0031775	CG9150	-1.11895	0.000165688	563Iso_Up	29.1881	22.6129	19.3609	43.4657	31.3131
FBgn0038181	CG9297	-1.55317	2.27526e-15	563Iso_Up	230.538	144.132	126.763	299.94	351.316
FBgn0030332	CG9360	-1.21246	8.00513e-05	563Iso_Up	383.798	213.243	312.94	474.921	534.087
FBgn0032507	CG9377	3.2714	3.60685e-43	563Grp_Up	40.9893	74.0357	77.0765	5.67863	7.16644
FBgn0034588	CG9394	1.15932	2.14631e-07	563Grp_Up	165.562	276.567	208.244	94.0599	83.3767
FBgn0037714	CG9396	-1.46524	0.0146664	563Iso_Up	11.8107	4.35021	9.95572	20.4491	12.4878
FBgn0036876	CG9451	1.13915	9.71745e-05	563Grp_Up	21.9965	32.5035	31.5647	13.6227	10.2951
FBgn0037765	CG9458	6.63155	1.40076e-36	563Grp_Up	11.1306	20.7661	23.3982	0.0906165	0.267404
FBgn0037764	CG9459	3.17664	0.0243951	563Grp_Up	0.58935	1.10807	1.05521	0.060411	0.133702
FBgn0031800	CG9497	-2.33034	1.09556e-21	563Iso_Up	21.2963	8.16691	8.44171	32.2897	36.2868
FBgn0031801	CG9498	-1.33944	2.74758e-07	563Iso_Up	45.3999	26.2244	32.6199	59.3538	63.4016
FBgn0030593	CG9512	-2.28402	2.00506e-30	563Iso_Up	710.194	318.181	252.059	1045.74	1224.79
FBgn0027563	CG9631	1.93429	5.07807e-11	563Grp_Up	43.5917	63.4474	79.921	18.0025	12.9959
FBgn0003060	CG9757	2.61836	0.0112438	563Grp_Up	1.96273	5.70452	1.23873	0.453082	0.454588
FBgn0038160	CG9759	2.85222	4.09132e-18	563Grp_Up	36.1812	82.572	47.4846	8.51795	6.1503
FBgn0032472	CG9928	-1.51824	0.00721806	563Iso_Up	28.3079	8.9877	24.3617	44.1302	35.752
FBgn0038142	CheA87a	1.44585	4.04607e-05	563Grp_Up	22.7828	41.5733	28.5825	8.48774	12.4878
FBgn0031830	COX5B	-1.20186	1.7856e-05	563Iso_Up	281.267	164.282	223.568	348.571	388.646
FBgn0085201	COX7AL2	-1.39789	0.0296323	563Iso_Up	14.0718	4.55541	13.0296	17.791	20.911
FBgn0040773	COX7C	-1.00137	2.70753e-07	563Iso_Up	146.192	112.367	108.779	191.442	172.182
FBgn0015623	Cpr	3.52372	6.75759e-43	563Grp_Up	876.236	1567.02	1703.57	141.905	92.4417
FBgn0033603	Cpr47Ef	-2.16962	1.77095e-12	563Iso_Up	20.7442	7.38715	10.231	30.1149	35.2439
FBgn0050042	Cpr49Ab	-2.58767	0.0018998	563Iso_Up	1.6399	0.697676	0.41291	1.81233	3.6367
FBgn0033728	Cpr49Ae	-2.20059	1.79911e-10	563Iso_Up	32.1339	9.93162	16.7917	53.947	47.8654
FBgn0033730	Cpr49Ag	-1.95114	2.51532e-18	563Iso_Up	23.376	11.8194	10.598	35.5217	35.5648
FBgn0050163	Cpr60D	-1.68985	0.00259706	563Iso_Up	2.59173	1.55951	1.28461	3.80589	3.71692
FBgn0035280	Cpr62Bb	-1.44808	0.028761	563Iso_Up	14.0525	4.22709	12.892	21.4157	17.6754
FBgn0036880	Cpr76Bc	2.36947	7.98141e-06	563Grp_Up	4.72319	7.79755	8.48759	1.75192	0.855694
FBgn0085732	CR40190	1.16552	0.00388712	563Grp_Up	6.55037	10.0958	9.08402	3.8663	3.15537
FBgn0286919	CR46419	-2.8522	0.0138327	563Iso_Up	0.838481	0.164159	0.321152	0.996781	1.87183
FBgn0050489	Cyp12d1-p	-1.75564	0.0432067	563Iso_Up	3.50141	0.820795	2.84449	6.22233	4.11803
FBgn0010383	Cyp18a1	-1.90542	2.14061e-11	563Iso_Up	19.1324	11.327	7.52414	28.665	29.0134
FBgn0038095	Cyp304a1	4.18583	5.63938e-08	563Grp_Up	2.2643	3.16006	5.50546	0.151027	0.240664
FBgn0030949	Cyp308a1	3.34924	4.09132e-18	563Grp_Up	6.26541	12.1888	11.0109	0.845754	1.01614
FBgn0041337	Cyp309a2	2.59044	4.10036e-08	563Grp_Up	25.5409	35.4994	54.2747	8.69918	3.69018
FBgn0036778	Cyp312a1	2.51124	0.000129232	563Grp_Up	4.44104	11.2859	4.26674	1.32904	0.882435
FBgn0005670	Cyp4d1	2.51565	3.6879e-09	563Grp_Up	19.7305	23.1054	45.7871	5.37658	4.65284
FBgn0023541	Cyp4d14	1.26509	0.0137489	563Grp_Up	4.36336	6.36116	6.65244	1.87274	2.56708
FBgn0031925	Cyp4d21	1.12248	0.00807002	563Grp_Up	12.1945	15.3489	20.0032	7.94404	5.48179
FBgn0015033	Cyp4d8	1.36934	0.000158542	563Grp_Up	12.2961	17.6471	19.6362	7.00767	4.8935
FBgn0015034	Cyp4e1	1.67497	1.74578e-08	563Grp_Up	18.9622	26.84	33.4457	7.46076	8.10235
FBgn0014469	Cyp4e2	1.22868	9.27064e-06	563Grp_Up	136.862	173.106	231.597	75.5741	67.172
FBgn0015035	Cyp4e3	1.77855	0.00269043	563Grp_Up	12.7125	17.3188	23.6276	7.30973	2.59382
FBgn0010019	Cyp4g1	10.4248	9.27494e-19	563Grp_Up	3441.62	6700.97	7057.23	7.30973	0.962656
FBgn0033304	Cyp6a13	1.78366	7.8666e-13	563Grp_Up	46.3167	67.0179	82.4443	17.9421	17.8626
FBgn0031726	Cyp6a16	3.42975	1.99529e-07	563Grp_Up	2.96673	3.8167	7.20298	0.392671	0.454588
FBgn0000473	Cyp6a2	1.934	9.57546e-10	563Grp_Up	206.163	263.147	414.424	81.1923	65.8885
FBgn0288232	Cyp6a21	1.47699	5.8792e-07	563Grp_Up	15.1427	26.2244	20.5996	6.31295	7.43384
FBgn0034756	Cyp6d2	3.09791	8.71152e-22	563Grp_Up	17.5472	27.9891	36.0149	3.56425	2.62056
FBgn0025454	Cyp6g1	1.38545	2.89255e-05	563Grp_Up	2276.54	2990.98	3925.35	1343.93	845.88
FBgn0031182	Cyp6t1	2.13127	1.27517e-06	563Grp_Up	26.3707	41.1629	47.5764	11.6895	5.05394
FBgn0031126	Cyp6v1	-1.06099	0.00453638	563Iso_Up	29.963	17.1546	26.7933	37.4246	38.4795
FBgn0033065	Cyp6w1	2.58694	1.04377e-23	563Grp_Up	587.834	895.98	1170.97	160.874	123.514
FBgn0015039	Cyp9b2	1.53268	3.7378e-11	563Grp_Up	155.134	219.891	262.978	73.2483	64.4177
FBgn0015040	Cyp9c1	1.5114	1.81856e-07	563Grp_Up	17.3957	24.6649	29.3166	7.79302	7.80821
FBgn0033775	Cyp9h1	2.04138	2.28346e-11	563Grp_Up	40.2637	55.3626	78.7281	14.7705	12.1936
FBgn0004629	Cys	-1.06423	0.000169864	563Iso_Up	434.548	276.033	361.526	501.834	598.799
FBgn0031860	Daao2	-1.67736	0.0113293	563Iso_Up	7.22124	2.42134	5.45959	13.8643	7.1397
FBgn0039016	Dcr-1	1.19931	6.68446e-05	563Grp_Up	19.9907	33.8168	25.1416	11.5385	9.46612
FBgn0086687	Desat1	-1.09962	0.000820942	563Iso_Up	705.914	442.983	575.688	1080.69	724.292
FBgn0033215	Dgat2	2.03683	0.00119185	563Grp_Up	3.11182	4.0219	6.33128	1.23842	0.855694
FBgn0039638	dgt6	2.21773	5.93709e-09	563Grp_Up	15.5862	28.4816	24.4993	6.10151	3.26233
FBgn0004240	DptA	-5.80632	0.0189152	563Iso_Up	44.1128	2.05199	1.69752	168.637	4.06455
FBgn0053196	dpy	-1.05559	7.75454e-09	563Iso_Up	184.241	142.695	129.745	240.224	224.299
FBgn0260006	drd	-1.15825	1.03074e-06	563Iso_Up	25.6006	18.0164	18.1222	34.0416	32.2222
FBgn0015872	Drip	-1.0385	7.85251e-06	563Iso_Up	30.58	22.5719	22.9394	38.7838	38.0249
FBgn0010388	Dro	-4.92979	0.0425578	563Iso_Up	74.0652	6.56636	4.81728	275.625	9.25219
FBgn0000500	Dsk	2.06865	2.04376e-15	563Grp_Up	111.956	166.293	207.969	32.3803	41.1803
FBgn0243514	eater	4.48036	1.18616e-24	563Grp_Up	31.2327	87.5788	32.9869	2.38623	1.97879
FBgn0000451	ect	-1.60536	0.000157597	563Iso_Up	4.67225	2.87278	2.47746	6.25254	7.08622
FBgn0004554	Edg91	-3.6454	0.000642101	563Iso_Up	1.22849	0.205199	0.229394	3.38301	1.09636
FBgn0034885	Eglp4	-1.59994	0.000176327	563Iso_Up	98.141	37.182	74.1861	162.415	118.781
FBgn0000564	Eh	1.23365	0.00362311	563Grp_Up	7.56688	10.7114	11.6991	4.62144	3.23559
FBgn0013949	Elal	1.15609	0.00214048	563Grp_Up	56.4744	62.6677	101.943	33.3167	27.9705
FBgn0263916	Ent2	1.08544	0.00133839	563Grp_Up	14.0187	18.591	21.7925	8.57836	7.11296
FBgn0000592	Est-6	-1.80607	1.43002e-20	563Iso_Up	120.252	59.918	64.1845	173.893	183.012
FBgn0031055	et	2.97003	5.83263e-27	563Grp_Up	35.3638	58.2764	69.69	7.79302	5.69571
FBgn0005660	Ets21C	1.2689	0.0162445	563Grp_Up	6.80761	7.55131	12.7084	3.65486	3.31582
FBgn0038665	euc	-1.16389	1.67248e-05	563Iso_Up	38.0571	26.0602	27.5273	43.3147	55.326
FBgn0016013	Faa	-1.29883	0.000411124	563Iso_Up	21.1637	10.9987	16.8834	30.3263	26.4463
FBgn0037913	fabp	-1.57121	2.72559e-08	563Iso_Up	57.0469	29.7538	36.4278	69.8049	92.2011
FBgn0023550	FarO	-1.7068	0.00432803	563Iso_Up	3.68419	2.7907	1.23873	5.22555	5.48179
FBgn0042627	FASN2	2.36945	0.000142872	563Grp_Up	5.20521	7.42819	10.5063	2.08418	0.802213
FBgn0026721	Fatp1	1.53448	3.84749e-14	563Grp_Up	255.829	380.644	510.035	77.4167	55.219
FBgn0267828	Fatp3	1.74169	4.79166e-08	563Grp_Up	378.476	561.916	616.887	178.243	156.859
FBgn0034999	fat-spondin	2.47386	1.61968e-18	563Grp_Up	32.8678	43.1738	62.2118	14.106	11.9797
FBgn0032820	fbp	-1.72189	0.000141633	563Iso_Up	54.3333	19.4528	38.5383	97.8658	61.4763
FBgn0038914	fit	-6.85509	8.99231e-08	563Iso_Up	16.5583	0.0820795	0.596425	30.6586	34.8963
FBgn0032773	fon	1.65292	3.99115e-05	563Grp_Up	266.624	365.295	478.975	149.306	72.9212
FBgn0259878	Fs	-1.27788	0.000414912	563Iso_Up	25.2188	16.7442	16.9293	41.9856	25.2162
FBgn0263199	Galk	-1.13025	0.0265628	563Iso_Up	50.3758	23.3106	48.0352	77.024	53.1333
FBgn0026077	Gasp	-1.43221	9.79054e-06	563Iso_Up	46.5246	23.5158	34.0421	71.5568	56.9839
FBgn0034200	Gbp2	3.51481	4.22625e-31	563Grp_Up	424.518	639.112	944.141	68.2644	46.5551
FBgn0036428	Gbs-70E	-1.13104	0.0029533	563Iso_Up	69.831	36.6485	62.487	92.6402	87.5482
FBgn0023515	Gcna	1.14411	0.00640234	563Grp_Up	7.59419	11.9426	10.231	3.44343	4.7598
FBgn0030289	GCS1	1.39904	6.10926e-08	563Grp_Up	68.5602	107.935	101.163	38.0287	27.1148
FBgn0011770	Gip	-1.61278	0.000365516	563Iso_Up	26.5239	12.3119	17.7092	50.564	25.5104
FBgn0264561	Glg1	1.32203	2.5665e-13	563Grp_Up	135.732	207.415	201.271	68.355	65.8885
FBgn0027657	glob1	-1.1397	3.41228e-07	563Iso_Up	126.543	84.3367	95.4739	171.748	154.613
FBgn0040321	GNBP3	1.15979	3.1921e-05	563Grp_Up	68.4878	87.7019	112.311	39.6296	34.308
FBgn0035468	Gr63a	-2.87689	0.0190603	563Iso_Up	0.700129	0.123119	0.275273	1.35925	1.04288
FBgn0039494	grass	1.43138	3.38301e-13	563Grp_Up	63.1542	96.7307	96.8962	29.843	29.1471
FBgn0010038	GstD2	-1.65468	0.000165688	563Iso_Up	6.70617	3.28318	4.17498	11.4781	7.88843
FBgn0010039	GstD3	-1.06609	0.0105458	563Iso_Up	10.416	9.6033	5.78074	14.1664	12.1134
FBgn0063495	GstE5	-1.30638	0.017445	563Iso_Up	3.65255	2.01095	2.79861	5.01411	4.78654
FBgn0063493	GstE7	-1.35153	0.00409433	563Iso_Up	6.82284	3.36526	5.41371	9.39391	9.11849
FBgn0038435	Gyc89Da	1.26096	0.0152259	563Grp_Up	3.71583	6.07388	5.0008	2.02377	1.76487
FBgn0286508	Had1	-1.87995	0.0466754	563Iso_Up	83.8239	25.6088	56.7063	155.619	97.362
FBgn0061356	Hao	-2.43476	1.41516e-06	563Iso_Up	23.5479	4.59645	12.4791	42.8616	34.2545
FBgn0031107	HERC2	1.04446	1.01106e-05	563Grp_Up	213.552	343.051	268.529	134.354	108.272
FBgn0041629	Hexo2	1.23306	4.4506e-11	563Grp_Up	102.598	162.435	141.857	54.0074	52.0904
FBgn0004644	hh	1.96932	0.000808715	563Grp_Up	2.66007	5.08893	3.71619	0.845754	0.989396
FBgn0286723	hll	-3.81181	6.98935e-15	563Iso_Up	14.5922	2.25719	2.3857	38.9651	14.7607
FBgn0015737	Hmu	1.1204	5.77934e-08	563Grp_Up	143.762	229.946	187.782	83.488	73.8304
FBgn0001208	Hn	-1.47023	0.00156939	563Iso_Up	111.997	45.2258	90.152	193.587	119.022
FBgn0036992	Hpd	-1.26193	4.79556e-07	563Iso_Up	157.925	93.4475	118.551	218.053	201.65
FBgn0062928	hpRNA:CR33940	-1.04708	0.00395604	563Iso_Up	19.6108	11.9015	17.0669	25.9163	23.5583
FBgn0001225	Hsp26	-2.22932	2.35682e-06	563Iso_Up	42.6819	10.9987	23.7653	86.146	49.8174
FBgn0001226	Hsp27	-1.61888	2.02052e-05	563Iso_Up	23.7078	14.9795	11.9744	43.6771	24.2001
FBgn0001230	Hsp68	-1.46379	6.65449e-05	563Iso_Up	46.3964	25.3626	31.2435	81.6756	47.3038
FBgn0013276	Hsp70Ab	-2.57257	1.74939e-06	563Iso_Up	6.13111	1.47743	2.66097	13.1394	7.24666
FBgn0013278	Hsp70Bb	-1.956	0.0146887	563Iso_Up	3.68658	1.14911	2.33982	8.15548	3.10189
FBgn0013279	Hsp70Bc	-2.36408	4.68632e-11	563Iso_Up	19.9108	7.30507	7.89117	41.0493	23.3979
FBgn0020416	Idgf1	1.20663	0.000494642	563Grp_Up	55.4826	77.1547	86.344	36.3976	22.0341
FBgn0064237	Idgf5	2.12908	2.97558e-11	563Grp_Up	59.0847	85.6089	113.137	22.8051	14.7875
FBgn0013763	Idgf6	2.13426	6.73884e-16	563Grp_Up	639.364	1006.34	1146.65	241.674	162.796
FBgn0035445	Ids	1.19106	3.88012e-05	563Grp_Up	13.6176	19.8222	20.2326	7.24932	7.16644
FBgn0044047	Ilp6	-1.25961	8.67784e-07	563Iso_Up	20.4686	14.446	13.1672	29.1785	25.0825
FBgn0027108	Inx2	-1.24361	1.12583e-06	563Iso_Up	74.7041	46.6212	54.5959	108.981	88.6178
FBgn0265274	Inx3	-1.09712	7.79725e-06	563Iso_Up	50.7361	35.8277	37.7583	58.8705	70.4878
FBgn0036757	Ir75a	-3.59725	0.0443426	563Iso_Up	0.498848	0	0.183515	0.875959	0.935916
FBgn0038465	Irc	1.92205	9.80062e-11	563Grp_Up	178.253	261.71	323.675	77.326	50.2988
FBgn0259682	Jabba	1.8666	2.90022e-11	563Grp_Up	122.83	166.375	234.074	49.0235	41.8488
FBgn0035665	Jon65Aiii	6.54	2.45258e-06	563Grp_Up	1.62614	2.54446	3.8997	0.060411	0
FBgn0003356	Jon99Cii	3.48504	0.0234252	563Grp_Up	0.608652	0.615596	1.65164	0.060411	0.106962
FBgn0039155	Kal1	-1.06259	6.15717e-05	563Iso_Up	33.5829	26.1423	23.3523	47.6945	37.1425
FBgn0004379	Klp67A	2.59201	0.00505301	563Grp_Up	1.26465	2.70862	1.7434	0.392671	0.213924
FBgn0027330	l(1)G0020	1.15552	0.00776805	563Grp_Up	9.29086	17.0725	10.1392	5.16514	4.78654
FBgn0011296	l(2)efl	-1.12766	4.60261e-08	563Iso_Up	69.4332	49.6581	49.6868	93.7276	84.6602
FBgn0029994	Ldsdh1	1.36521	1.13e-06	563Grp_Up	226.182	294.624	390.292	122.423	97.3887
FBgn0040102	lectin-24Db	2.54127	3.48902e-27	563Grp_Up	23.0417	40.3421	40.4193	5.95048	5.45505
FBgn0040099	lectin-28C	1.29733	0.000131961	563Grp_Up	63.4298	92.0111	97.9973	39.9921	23.7188
FBgn0039354	Lgr3	1.12967	0.0183807	563Grp_Up	5.24521	8.00275	7.24886	3.3226	2.40664
FBgn0024740	Lip2	-2.02396	0.014172	563Iso_Up	1.36032	0.656636	0.596425	2.47685	1.71139
FBgn0033593	Listericin	1.58896	2.99344e-11	563Grp_Up	119.924	224.036	153.327	52.4065	49.9244
FBgn0052194	lncRNA:CR32194	-2.03873	0.0243675	563Iso_Up	1.27053	0.656636	0.504668	2.47685	1.44398
FBgn0052368	lncRNA:CR32368	2.94269	2.63634e-11	563Grp_Up	5.88347	10.2599	11.0109	0.845754	1.41724
FBgn0062961	lncRNA:CR33942	-1.91602	0.0332936	563Iso_Up	2.26578	0.492477	1.69752	3.50384	3.3693
FBgn0267910	lncRNA:CR34335	-1.2841	7.51004e-11	563Iso_Up	705.036	526.95	415.846	903.325	974.021
FBgn0058469	lncRNA:CR40469	-1.18324	3.07847e-06	563Iso_Up	357.251	221.902	275.503	431.606	499.993
FBgn0263330	lncRNA:CR43411	-3.06482	3.81028e-09	563Iso_Up	3.62441	0.738715	1.10109	7.30973	5.34809
FBgn0263336	lncRNA:CR43417	-1.46804	0.0121778	563Iso_Up	4.97021	2.05199	3.99146	6.40356	7.43384
FBgn0263406	lncRNA:CR43452	-3.37673	8.05956e-06	563Iso_Up	1.55727	0.287278	0.367031	3.14137	2.43338
FBgn0263413	lncRNA:CR43459	-1.14829	0.0220317	563Iso_Up	4.31368	2.95486	3.16564	4.98391	6.1503
FBgn0263659	lncRNA:CR43650	-1.02078	0.00505301	563Iso_Up	38.8213	22.8591	35.0973	47.0299	50.2988
FBgn0264084	lncRNA:CR43753	2.34752	0.000194027	563Grp_Up	2.58859	5.21205	3.71619	0.543699	0.882435
FBgn0264462	lncRNA:CR43870	-1.34528	3.7009e-06	563Iso_Up	13.6935	8.37211	9.35929	18.2441	18.7985
FBgn0264987	lncRNA:CR44138	-2.03148	0.0280763	563Iso_Up	1.44957	0.779755	0.550546	3.05075	1.41724
FBgn0265813	lncRNA:CR44602	-1.48569	0.0286295	563Iso_Up	2.71685	1.35431	1.92691	4.59123	2.99493
FBgn0266975	lncRNA:CR45426	-2.27593	0.0100816	563Iso_Up	2.47408	1.60055	0.41291	2.7487	5.13417
FBgn0266976	lncRNA:CR45427	-3.37129	0.0240757	563Iso_Up	0.962739	0.410397	0	1.0874	2.35316
FBgn0266980	lncRNA:CR45431	-4.86483	0.00122968	563Iso_Up	0.836736	0	0.137637	0.93637	2.27294
FBgn0267099	lncRNA:CR45539	-1.26637	0.0136643	563Iso_Up	4.73329	2.5855	3.76207	5.98069	6.60489
FBgn0027794	Lrpprc2	1.22578	4.50317e-07	563Grp_Up	65.1951	92.2984	100.566	37.485	30.4306
FBgn0002565	Lsp2	-3.52156	0.00738043	563Iso_Up	369.264	26.6348	111.623	871.187	467.61
FBgn0034140	Lst	-2.25374	0.0354673	563Iso_Up	42.4637	8.61835	25.371	77.5979	58.2674
FBgn0036996	mag	-9.20941	3.80517e-05	563Iso_Up	10.0757	0.0820795	0	34.5249	5.69571
FBgn0002570	Mal-A1	1.86777	0.000361221	563Grp_Up	4.8097	7.42819	8.2582	2.29562	1.2568
FBgn0032381	Mal-B1	2.35113	1.14279e-11	563Grp_Up	8.96698	15.513	15.3694	2.89973	2.08575
FBgn0032382	Mal-B2	1.77466	3.93801e-09	563Grp_Up	309.582	542.915	455.99	150.484	88.9387
FBgn0025815	Mcm6	1.0184	0.0430749	563Grp_Up	4.9029	8.00275	5.96425	3.05075	2.59382
FBgn0004512	Mdr49	1.1612	3.24007e-08	563Grp_Up	89.4786	128.208	133.462	50.866	45.3785
FBgn0030993	Mec2	4.56187	2.82409e-110	563Grp_Up	94.9903	201.259	165.99	5.92028	6.79207
FBgn0034795	MED23	1.11704	0.00607835	563Grp_Up	7.28537	12.3119	8.85462	4.01733	3.95759
FBgn0002772	Mlc1	-1.02558	5.30271e-06	563Iso_Up	388.207	283.133	297.708	440.547	531.44
FBgn0002773	Mlc2	-1.08562	6.6479e-05	563Iso_Up	1021.38	651.301	833.573	1185.5	1415.13
FBgn0259209	Mlp60A	-1.05756	0.000293109	563Iso_Up	202.605	133.913	164.522	220.168	291.818
FBgn0014863	Mlp84B	-1.93785	1.40866e-23	563Iso_Up	209.108	96.2792	105.154	308.096	326.902
FBgn0034187	Mov10	2.73495	0.0176852	563Grp_Up	1.15167	2.87278	1.23873	0.120822	0.374366
FBgn0038662	Mpc1	-1.35079	7.94224e-10	563Iso_Up	65.1904	40.1369	43.9978	93.0631	83.5639
FBgn0034497	Mpcp1	-1.20468	3.67608e-08	563Iso_Up	206.509	133.42	151.63	259.223	281.764
FBgn0026409	Mpcp2	-1.03942	7.2503e-06	563Iso_Up	984.214	765.843	699.24	1404.62	1067.16
FBgn0044511	mRpS21	-1.27928	0.0234531	563Iso_Up	14.9872	5.9918	13.8554	18.3347	21.7667
FBgn0013679	mt:ND1	-2.21648	0.0240411	563Iso_Up	201.002	47.3599	117.129	389.923	249.595
FBgn0052475	mthl8	-2.31138	1.48299e-06	563Iso_Up	4.59183	1.60055	2.01867	5.95048	8.79761
FBgn0053192	MtnD	-6.12957	0.0146184	563Iso_Up	0.648139	0	0.0458789	2.38623	0.160443
FBgn0262146	MtnE	-1.47109	0.0269427	563Iso_Up	2.141	1.19015	1.42225	2.92993	3.02167
FBgn0267431	Myo81F	-1.17519	0.0416336	563Iso_Up	2.99216	2.17511	2.01867	4.13815	3.6367
FBgn0031261	nAChRbeta3	5.2063	2.39556e-75	563Grp_Up	202.022	333.817	456.541	10.5115	7.21992
FBgn0286852	naz	1.4908	2.19328e-08	563Grp_Up	16.6359	28.0301	23.49	7.88363	7.1397
FBgn0034645	ND-B12	-1.18424	4.11129e-05	563Iso_Up	133.53	77.8524	107.724	167.429	181.113
FBgn0031505	ND-B14.5B	-1.28334	0.00281554	563Iso_Up	91.3634	40.1779	80.6092	120.671	123.995
FBgn0033961	ND-B15	-1.04419	0.000174494	563Iso_Up	73.3839	47.9344	60.7436	86.72	98.1374
FBgn0030605	ND-B18	-1.18072	1.05596e-08	563Iso_Up	95.4576	64.3914	68.9101	121.94	126.589
FBgn0052230	Ndg	-1.4579	1.24976e-07	563Iso_Up	149.901	70.3011	119.606	192.137	217.56
FBgn0026403	ND-MLRQ	-1.37872	0.000123335	563Iso_Up	12.678	8.24899	7.34062	17.8212	17.3011
FBgn0030425	Nep6	2.20986	1.27517e-06	563Grp_Up	52.3617	70.3011	107.265	22.201	9.68004
FBgn0039564	Nep7	2.84331	4.58551e-11	563Grp_Up	23.3089	31.4775	52.0725	6.34315	3.34256
FBgn0037727	Nepl12	1.6931	5.69257e-05	563Grp_Up	15.46	19.2066	30.0048	7.52117	5.10742
FBgn0039022	Nepl13	2.61324	2.38773e-15	563Grp_Up	19.2061	29.5486	38.1253	5.40678	3.74366
FBgn0039024	Nepl15	1.22552	1.39204e-06	563Grp_Up	88.9429	133.625	129.608	53.5241	39.0143
FBgn0039609	Nepl17	2.7225	0.0012365	563Grp_Up	2.46253	2.91382	5.82662	0.815548	0.294145
FBgn0039611	Nepl18	2.46438	0.00645874	563Grp_Up	43.9711	54.1314	98.6855	15.7673	7.30014
FBgn0039612	Nepl19	2.38183	7.55613e-22	563Grp_Up	23.3317	38.249	42.3462	6.55459	6.17704
FBgn0027578	Nepl21	1.30073	5.47744e-05	563Grp_Up	64.912	81.2177	113.137	37.0017	28.2914
FBgn0031805	Nepl4	2.20145	1.39578e-07	563Grp_Up	28.0426	40.5883	54.4582	11.5083	5.61549
FBgn0259716	Nepl6	2.87218	2.88834e-20	563Grp_Up	21.8504	37.3462	41.1992	5.40678	3.44952
FBgn0263390	Nha2	-1.45375	6.63747e-06	563Iso_Up	22.756	11.9836	15.92	35.3102	27.8101
FBgn0028543	NimB2	2.15133	1.49895e-16	563Grp_Up	355.713	518.496	681.118	125.021	98.2177
FBgn0028542	NimB4	2.02212	5.44926e-09	563Grp_Up	30.4516	51.1766	50.0997	13.23	7.30014
FBgn0259896	NimC1	2.55641	5.29734e-38	563Grp_Up	48.1473	87.6609	81.3432	12.354	11.231
FBgn0028939	NimC2	2.59998	1.99529e-07	563Grp_Up	9.87829	23.5979	11.2403	2.99034	1.68465
FBgn0260011	NimC4	1.6621	0.0437272	563Grp_Up	6.2341	13.1738	6.65244	3.98712	1.1231
FBgn0010222	Nmdmc	-1.53852	0.000220101	563Iso_Up	68.2995	32.8728	47.3011	126.44	66.5837
FBgn0016047	nompA	1.05134	0.00505301	563Grp_Up	8.33665	13.1738	10.7357	4.41	5.0272
FBgn0042201	Nplp3	-1.43303	1.30318e-09	563Iso_Up	436.252	258.427	282.797	682.614	521.171
FBgn0029147	NtR	2.42317	2.60736e-18	563Grp_Up	48.0307	72.9687	93.5011	14.5288	11.124
FBgn0022774	Oat	-1.16774	0.0362345	563Iso_Up	34.9352	14.9795	33.6292	54.5511	36.5809
FBgn0030985	Obp18a	-1.79275	8.05948e-15	563Iso_Up	23.3677	12.1067	12.2038	33.6489	35.5113
FBgn0031110	Obp19b	1.06678	0.000384723	563Grp_Up	33.3373	47.6882	48.1269	15.7673	21.7667
FBgn0031111	Obp19c	-1.71538	3.41289e-08	563Iso_Up	9.15622	5.37621	4.54201	13.9247	12.7819
FBgn0034470	Obp56d	-1.11789	2.36898e-10	563Iso_Up	766.738	593.147	510.907	971.922	990.974
FBgn0034471	Obp56e	-2.36568	9.35566e-15	563Iso_Up	317.422	91.4776	149.29	496.276	532.643
FBgn0043535	Obp57a	-1.00647	0.00857291	563Iso_Up	11.1021	8.94666	7.84529	11.5989	16.0175
FBgn0046878	Obp83cd	-2.9322	0.00101078	563Iso_Up	1.22745	0.492477	0.183515	2.1748	2.05901
FBgn0039678	Obp99a	-8.11931	6.16858e-08	563Iso_Up	77.4424	0.123119	1.19285	138.251	170.203
FBgn0019952	Orct	1.02321	0.00240385	563Grp_Up	25.6267	30.8619	42.025	14.3778	15.2421
FBgn0003028	ovo	-1.32801	1.71148e-05	563Iso_Up	13.6566	8.90562	8.94638	16.3714	20.403
FBgn0035977	PGRP-LF	1.649	2.57743e-05	563Grp_Up	14.5318	21.7921	24.224	7.67219	4.43891
FBgn0035089	Phk-3	-1.78119	3.82024e-10	563Iso_Up	15.6172	8.04379	8.30408	20.6908	25.4302
FBgn0043791	phu	5.9474	1.78778e-18	563Grp_Up	343.736	599.796	757.047	5.34637	12.7552
FBgn0032923	Pld3	1.28858	2.27889e-07	563Grp_Up	25.9477	37.6334	40.0064	13.7435	12.4076
FBgn0037292	plh	-1.26621	1.3584e-05	563Iso_Up	21.4212	15.8413	13.0296	24.8591	31.9548
FBgn0002891	PolZ1	1.09415	0.000368284	563Grp_Up	12.9557	20.5199	16.9293	7.58158	6.79207
FBgn0069354	Porin2	-2.74994	0.0140152	563Iso_Up	0.791309	0.164159	0.321152	1.44986	1.23006
FBgn0003137	Ppn	1.48206	1.29538e-11	563Grp_Up	141.765	224.159	214.025	72.3723	56.5026
FBgn0283437	PPO1	1.5885	2.41531e-07	563Grp_Up	12.7632	22.3667	17.7551	6.01089	4.92024
FBgn0037513	pyd3	-1.02448	0.00122063	563Iso_Up	25.3208	16.6621	21.1502	34.404	29.0669
FBgn0036726	QIL1	-1.2429	0.00395639	563Iso_Up	142.689	64.6786	127.589	173.228	205.26
FBgn0033814	Qsox1	2.07708	1.27168e-31	563Grp_Up	204.812	360.247	325.648	70.6204	62.7331
FBgn0003189	r	1.5827	1.09768e-06	563Grp_Up	26.9213	39.9317	44.5025	14.106	9.14523
FBgn0037364	Rab23	-1.17651	0.0415112	563Iso_Up	2.97987	2.29823	1.88103	3.8361	3.9041
FBgn0038946	rdhB	-1.19772	0.00102858	563Iso_Up	93.2042	49.8633	78.5905	139.006	105.357
FBgn0030362	regucalcin	-1.19724	0.00029446	563Iso_Up	133.111	72.8045	110.797	188.935	159.908
FBgn0040074	retinin	-1.77592	1.30705e-21	563Iso_Up	711.481	382.285	364.187	1139.68	959.768
FBgn0014019	Rh5	-1.50824	1.35942e-07	563Iso_Up	124.669	66.9358	81.9855	205.035	144.719
FBgn0011705	rost	-2.37496	4.62739e-16	563Iso_Up	12.362	4.35021	5.04668	19.0597	20.9912
FBgn0066084	RpL41	-1.42775	3.80012e-05	563Iso_Up	320.215	148.646	247.746	409.556	474.91
FBgn0028695	Rpn1	1.09714	0.0257633	563Grp_Up	118.798	108.427	233.478	72.614	60.6741
FBgn0019936	RpS20	-1.09625	1.7187e-07	563Iso_Up	361.569	254.734	269.676	430.67	491.195
FBgn0261599	RpS29	-1.146	2.68985e-09	563Iso_Up	376.721	261.136	273.3	472.293	500.153
FBgn0086253	rumi	1.18875	0.0282468	563Grp_Up	5.06744	6.52532	8.34996	3.20178	2.19272
FBgn0038038	Sccpdh2	1.31416	0.00134026	563Grp_Up	22.1746	25.4446	41.0616	12.5655	9.62656
FBgn0020908	Scp1	-3.06931	8.27158e-22	563Iso_Up	109.848	26.5117	29.1331	137.737	246.012
FBgn0263006	SERCA	-1.312	4.27321e-15	563Iso_Up	1132.73	761.821	729.382	1538.85	1500.89
FBgn0003360	sesB	-1.17415	2.00538e-10	563Iso_Up	2705.36	1896.04	1896.04	3357.49	3671.86
FBgn0003366	sev	1.11399	4.82734e-05	563Grp_Up	75.1358	128.947	89.2803	45.0666	37.2494
FBgn0032055	Sgp	7.83933	3.12357e-38	563Grp_Up	17.8528	28.892	42.2544	0.211438	0.0534809
FBgn0026176	SkpB	-1.64905	0.0180171	563Iso_Up	2.47157	1.72367	1.05521	2.7487	4.35869
FBgn0043854	slam	1.61765	0.0152259	563Grp_Up	2.51388	3.24214	4.67965	1.1176	1.01614
FBgn0038257	smp-30	-2.15203	0.0308282	563Iso_Up	34.3867	8.04379	21.1043	63.3409	45.0576
FBgn0003447	sn	-1.45931	1.35617e-12	563Iso_Up	191.178	110.479	123.827	258.348	272.057
FBgn0030051	spirit	1.11022	0.0130357	563Grp_Up	9.66562	17.8933	10.1851	5.31617	5.26787
FBgn0033170	sPLA2	-1.10743	0.0024307	563Iso_Up	15.7694	11.0397	11.6991	24.1342	16.2047
FBgn0032178	Spn31A	-1.2948	0.000179655	563Iso_Up	7.66215	5.17101	5.0008	9.96781	10.509
FBgn0024293	Spn43Ab	1.40524	6.38672e-05	563Grp_Up	252.804	294.501	475.443	136.77	104.502
FBgn0044011	Spn43Ad	1.95418	9.30917e-08	563Grp_Up	9.76017	14.2408	17.9386	3.8663	2.99493
FBgn0028984	Spn88Ea	1.07321	0.000231731	563Grp_Up	128.445	228.14	142.27	74.7284	68.6427
FBgn0014033	Sr-CI	2.44752	8.10377e-17	563Grp_Up	44.067	94.7197	58.6332	12.8071	10.1079
FBgn0003507	srp	-1.18966	0.0430328	563Iso_Up	17.2165	7.30507	16.4246	26.7923	18.3439
FBgn0037684	Srr	-1.43647	0.00672526	563Iso_Up	6.81818	3.32422	5.09256	11.6895	7.16644
FBgn0052667	ssp7	-2.19254	1.79603e-07	563Iso_Up	26.0439	7.05884	14.6354	44.6437	37.8377
FBgn0086450	su(r)	-1.11771	0.00042036	563Iso_Up	32.3197	19.8222	26.4721	45.0666	37.918
FBgn0014391	sun	-1.33142	2.52247e-10	563Iso_Up	182.025	119.385	118.092	222.765	267.859
FBgn0028563	sut1	1.7665	1.33012e-10	563Grp_Up	15.6711	24.0493	26.4262	6.19212	6.0166
FBgn0034709	Swim	-1.3196	1.64414e-07	563Iso_Up	131.731	82.654	89.785	203.162	151.324
FBgn0017482	T3dh	-1.20759	0.0114285	563Iso_Up	5.04346	3.28318	3.67031	7.55137	5.66897
FBgn0023477	Taldo	-1.29864	0.000473339	563Iso_Up	162.231	80.7662	132.544	250.675	184.937
FBgn0030558	Tat	-1.6364	0.0121766	563Iso_Up	2.20541	1.47743	1.00934	3.47363	2.86123
FBgn0035199	tfc	-1.11165	0.00949354	563Iso_Up	7.45316	6.56636	4.22086	8.97103	10.0544
FBgn0031077	THADA	1.0847	7.8669e-06	563Grp_Up	23.2334	34.4323	32.574	12.9582	12.9691
FBgn0261560	Thor	-1.27817	1.5774e-08	563Iso_Up	173.792	125.417	107.219	260.16	202.372
FBgn0014396	tim	1.06002	7.12754e-05	563Grp_Up	100.797	156.895	132.498	66.0896	47.705
FBgn0034060	Tmem131	1.51543	3.43154e-15	563Grp_Up	68.7872	107.196	106.531	31.2325	30.19
FBgn0261575	tobi	-3.2795	3.2804e-25	563Iso_Up	28.1861	4.92477	7.57001	55.9406	44.3089
FBgn0003733	tor	6.97054	3.04732e-36	563Grp_Up	10.8928	21.9563	21.3337	0.120822	0.160443
FBgn0028396	TotA	-2.66369	1.14908e-14	563Iso_Up	193.071	43.5842	79.7375	295.319	353.642
FBgn0044812	TotC	-2.84509	2.44444e-19	563Iso_Up	77.3582	19.3708	25.3251	102.155	162.582
FBgn0031701	TotM	-2.60575	4.04248e-16	563Iso_Up	15.6604	4.84269	5.59722	21.7177	30.4841
FBgn0013348	TpnC41C	-1.66861	1.97749e-10	563Iso_Up	28.9569	15.2668	16.7917	37.4548	46.3145
FBgn0013263	Trl	-1.07087	0.00551942	563Iso_Up	7.49673	5.17101	5.82662	9.12206	9.86722
FBgn0035934	TrpA1	1.19779	0.0130198	563Grp_Up	5.57642	9.6033	6.83595	3.35281	2.5136
FBgn0034094	Tsf3	1.10928	2.07275e-05	563Grp_Up	20.7585	30.985	29.179	10.7834	12.0867
FBgn0003867	tsl	-1.19756	0.0110101	563Iso_Up	33.1024	15.4309	30.0965	49.2047	37.6773
FBgn0033129	Tsp42Eh	-1.34467	0.000858279	563Iso_Up	6.42119	4.47333	3.85383	9.81678	7.54081
FBgn0029170	TwdlT	-1.33701	5.47744e-05	563Iso_Up	10.4149	7.79755	5.78074	14.9517	13.1296
FBgn0035978	UGP	-1.44193	9.38601e-06	563Iso_Up	112.978	56.84	82.2149	180.599	132.258
FBgn0040091	Ugt317A1	2.24754	2.45276e-15	563Grp_Up	18.175	28.2353	33.721	5.07452	5.66897
FBgn0027070	Ugt36E1	1.11552	0.00102539	563Grp_Up	21.2497	27.4556	34.088	13.3206	10.1346
FBgn0040262	Ugt37C2	3.0456	0.00289883	563Grp_Up	1.1145	1.84679	2.20219	0.302055	0.106962
FBgn0260008	UQCR-11	-1.0402	0.00525823	563Iso_Up	58.9002	33.2012	53.9077	73.9128	74.5791
FBgn0030733	UQCR-14	-1.12816	5.2464e-08	563Iso_Up	264.527	190.958	187.69	311.751	367.708
FBgn0034245	UQCR-6.4	-1.10655	3.53949e-07	563Iso_Up	46.5014	33.2012	33.9504	61.7098	57.1443
FBgn0036728	UQCR-Q	-1.0097	6.66601e-05	563Iso_Up	75.7534	62.0931	52.3478	82.9745	105.598
FBgn0038613	Vha100-4	3.21605	9.26448e-07	563Grp_Up	2.11165	4.22709	3.53267	0.392671	0.294145
FBgn0016076	vri	1.18107	3.50896e-05	563Grp_Up	59.4261	92.2573	82.2608	37.5152	25.6708
FBgn0260780	wisp	1.5718	0.0353518	563Grp_Up	3.62683	7.92067	3.48679	1.14781	1.95205
FBgn0046685	Wsck	1.51876	7.36474e-09	563Grp_Up	17.772	26.84	28.399	7.85343	7.99539
FBgn0041087	wun2	1.02793	0.00161075	563Grp_Up	11.8011	16.6621	16.9752	7.30973	6.25726
FBgn0041710	yellow-f	1.3071	0.025862	563Grp_Up	6.01938	6.64844	11.378	3.56425	2.48686
FBgn0004045	Yp1	-11.2201	0	563Iso_Up	3566.38	3.2011	4.08322	6658.86	7599.39
FBgn0005391	Yp2	-10.4752	0	563Iso_Up	2188.05	3.4063	4.08322	4188.47	4556.22
FBgn0004047	Yp3	-6.84461	4.91957e-227	563Iso_Up	3587.4	89.795	61.6612	6765.24	7432.91
FBgn0025693	ZnT41F	-1.04031	0.000620777	563Iso_Up	12.4834	9.11082	9.45105	16.1297	15.2421
FBgn0037000	ZnT77C	-2.59113	2.38943e-09	563Iso_Up	6.32671	2.01095	2.24806	8.18569	12.8622
FBgn0036985	zye	-2.77589	2.04528e-08	563Iso_Up	3.1464	0.984954	0.917577	5.01411	5.66897

## Sheet: DGRP360_GrpVSIso
FlyBase ID	GeneSymbol	log2FC	padj	Remark	Avg.norm.exp	360Grp_1	360Grp_2	360Iso_1	360Iso_2
FBgn0023129	aay	-1.1061	1.59122e-05	360Iso_Up	180.621	99.567	145.884	230.852	246.179
FBgn0029969	Acat1	-1.19722	4.77492e-05	360Iso_Up	60.5121	29.2932	49.6854	84.7524	78.3173
FBgn0010387	Acbp2	-1.57902	5.38044e-07	360Iso_Up	76.281	27.9481	54.8172	121.255	101.103
FBgn0033246	ACC	-1.62038	8.05258e-15	360Iso_Up	425.1	221.313	228.319	663.072	587.697
FBgn0012034	AcCoAS	-1.28544	1.0842e-08	360Iso_Up	548.405	367.361	316.353	803.063	706.842
FBgn0016122	Acer	-1.37237	3.43044e-08	360Iso_Up	87.125	43.1328	61.3486	125.425	118.593
FBgn0027572	ACOX1	-1.28817	1.60536e-08	360Iso_Up	91.7833	54.043	60.4155	135.792	116.883
FBgn0034629	Acox57D-d	-1.72868	2.32751e-06	360Iso_Up	6.10411	2.89943	3.21905	10.6014	7.69655
FBgn0034628	Acox57D-p	-2.3445	3.6507e-25	360Iso_Up	44.1156	15.095	16.4685	76.7059	68.1931
FBgn0014454	Acp1	1.44839	0.000643702	360Grp_Up	5.84801	6.21734	11.3833	2.70174	3.08966
FBgn0263120	Acsl	-1.65346	1.13163e-14	360Iso_Up	417.21	212.286	221.695	670.002	564.855
FBgn0038733	Acsx3	-1.15462	3.69056e-06	360Iso_Up	88.4153	59.6625	57.663	134.294	102.041
FBgn0000047	Act88F	-1.62006	0.00104223	360Iso_Up	3.02815	1.31521	1.91277	3.67084	5.21379
FBgn0038172	Adgf-D	-1.68988	7.89129e-07	360Iso_Up	41.7138	13.1819	29.6246	58.5866	65.4621
FBgn0000055	Adh	-1.70333	2.78319e-09	360Iso_Up	10.9063	5.3206	5.73831	15.7112	16.8552
FBgn0038984	AdipoR	-1.55964	1.07189e-13	360Iso_Up	276.844	139.86	162.259	410.165	395.09
FBgn0038467	AdSL	-1.59254	1.05577e-07	360Iso_Up	42.9283	16.3504	29.9045	61.817	63.6414
FBgn0030421	Agpat1	-1.02373	0.000185026	360Iso_Up	58.6181	48.1844	34.1499	75.5312	76.6069
FBgn0036622	Agpat4	-1.63626	6.24096e-05	360Iso_Up	5.27797	2.18205	3.40566	8.98622	6.53793
FBgn0014031	Agxt	-1.99003	4.9334e-08	360Iso_Up	84.7363	20.9835	53.2776	152.325	112.359
FBgn0012036	Aldh	-1.67469	1.67188e-13	360Iso_Up	478.52	212.316	280.617	750.996	670.152
FBgn0036857	Aldh7A1	-1.2555	1.20106e-07	360Iso_Up	61.4213	34.9725	42.874	88.3351	79.5035
FBgn0032477	Alg7	-1.16763	1.15913e-06	360Iso_Up	37.7384	26.0949	23.6064	50.687	50.5655
FBgn0035619	Alp10	7.23695	8.56469e-05	360Grp_Up	1.21079	0.896731	3.91885	0	0.0275862
FBgn0035620	Alp9	9.59996	0.000423318	360Grp_Up	2.26546	1.64401	7.41782	0	0
FBgn0015568	alpha-Est1	-1.09904	0.000292197	360Iso_Up	39.3235	20.5053	33.2169	56.1786	47.3931
FBgn0015569	alpha-Est10	-1.96858	1.05499e-13	360Iso_Up	28.1828	11.0896	13.8093	50.0116	37.8207
FBgn0015570	alpha-Est2	-2.32507	1.45035e-11	360Iso_Up	18.5278	4.48366	9.05067	35.4457	25.131
FBgn0261393	alpha-Est5	-2.22448	1.56752e-09	360Iso_Up	6.20703	1.82335	2.98579	10.7776	9.24138
FBgn0015575	alpha-Est7	-1.58951	3.40777e-11	360Iso_Up	173.901	77.0292	110.148	256.372	252.055
FBgn0015576	alpha-Est8	-1.5506	6.06528e-11	360Iso_Up	75.6002	43.6708	39.0952	121.373	98.2621
FBgn0039332	alrm	-1.3165	1.16087e-07	360Iso_Up	24.5709	15.1548	15.0222	32.2447	35.8621
FBgn0000078	Amy-d	-2.1865	7.25902e-10	360Iso_Up	90.2327	20.1466	50.7117	124.721	165.352
FBgn0012037	Ance	-1.00581	6.67552e-05	360Iso_Up	30.0667	21.5813	21.0871	40.4674	37.131
FBgn0033366	Ance-4	-2.63562	3.89678e-17	360Iso_Up	39.613	7.74178	16.3752	64.9005	69.4345
FBgn0035076	Ance-5	-1.80385	5.08859e-10	360Iso_Up	34.9079	12.2852	21.4603	53.8586	52.0276
FBgn0026268	Antdh	-1.19344	8.80351e-07	360Iso_Up	65.7357	41.5784	44.1337	98.5548	78.6759
FBgn0004569	aos	-1.01191	0.00245042	360Iso_Up	11.6415	8.84775	7.60443	17.1208	12.9931
FBgn0267408	AOX1	-1.09658	0.000397165	360Iso_Up	157.756	81.0645	134.594	239.779	175.586
FBgn0087002	apolpp	-1.76463	8.05258e-15	360Iso_Up	1681.98	724.619	928.953	2766.14	2308.19
FBgn0032136	Apoltp	-1.52272	3.36468e-09	360Iso_Up	201.854	87.4911	137.3	293.99	288.635
FBgn0033926	Arc1	2.26486	0.0384982	360Grp_Up	395.101	289.136	1042.18	108.04	141.048
FBgn0033928	Arc2	1.5994	0.00119798	360Grp_Up	6.418	5.26082	14.5557	2.84857	3.0069
FBgn0032076	Argl	-2.93179	9.90062e-22	360Iso_Up	66.786	11.1494	22.9066	127.598	105.49
FBgn0017424	asRNA:CR11538	-7.71887	5.75861e-05	360Iso_Up	0.652739	0	0	2.11441	0.496552
FBgn0263408	asRNA:CR43454	-1.30446	0.0364332	360Iso_Up	1.8579	1.04619	1.25963	2.64301	2.48276
FBgn0264874	asRNA:CR44065	-1.66142	0.00105007	360Iso_Up	2.52151	1.13586	1.49289	3.78831	3.66897
FBgn0265070	asRNA:CR44181	-1.14198	0.000569736	360Iso_Up	14.7293	7.44287	12.3164	19.3233	19.8345
FBgn0265524	asRNA:CR44374	-1.92736	0.0471897	360Iso_Up	0.751783	0.388583	0.279918	1.26277	1.07586
FBgn0265532	asRNA:CR44382	2.03422	0.0271762	360Grp_Up	0.82425	1.25542	1.44624	0.264301	0.331035
FBgn0265810	asRNA:CR44599	-1.72371	0.0257224	360Iso_Up	1.12667	0.56793	0.559835	1.5858	1.7931
FBgn0266406	asRNA:CR45046	-2.55695	5.01313e-06	360Iso_Up	2.56171	0.418475	1.25963	4.37564	4.1931
FBgn0266685	asRNA:CR45175	-1.2944	0.00672669	360Iso_Up	3.25377	1.73368	2.33265	4.72804	4.22069
FBgn0266705	asRNA:CR45195	1.87201	9.02078e-05	360Grp_Up	3.76951	4.36409	7.74439	1.20404	1.76552
FBgn0266869	asRNA:CR45330	-2.85695	0.0459457	360Iso_Up	0.39119	0.149455	0.0466529	0.734168	0.634483
FBgn0267776	asRNA:CR46107	1.71244	0.0379285	360Grp_Up	1.08888	1.82335	1.5862	0.587335	0.358621
FBgn0267914	asRNA:CR46195	-1.28247	0.0235782	360Iso_Up	3.45461	1.25542	3.12575	5.05108	4.38621
FBgn0026565	Ass	-2.61511	5.02916e-08	360Iso_Up	4.43291	0.777167	2.00608	9.04496	5.90345
FBgn0032336	AstC	1.39083	7.39355e-11	360Grp_Up	149.715	208.251	236.997	74.7971	78.8138
FBgn0036995	atk	-2.10303	5.49929e-07	360Iso_Up	13.5547	2.95921	8.25757	17.2089	25.7931
FBgn0041581	AttB	2.50343	0.0219492	360Grp_Up	19.7153	15.1846	52.9044	6.13765	4.63448
FBgn0038530	AttD	2.87112	6.3745e-05	360Grp_Up	1.8881	1.55433	5.17847	0.323034	0.496552
FBgn0000147	aurA	1.93461	0.000117172	360Grp_Up	2.60671	3.58692	4.8519	0.939736	1.04828
FBgn0024897	b6	-1.33675	0.0104098	360Iso_Up	2.73189	1.94292	1.35293	3.93514	3.69655
FBgn0034512	Bbd	-1.09926	0.002022	360Iso_Up	540.158	236.408	500.446	600.99	822.787
FBgn0087007	bbg	-1.09953	1.1527e-05	360Iso_Up	28.836	19.6384	19.5942	40.0562	36.0552
FBgn0034622	BBS9	1.15679	0.0152756	360Grp_Up	7.2281	6.48635	14.1358	4.78678	3.50345
FBgn0028482	bdl	-1.21632	4.05817e-08	360Iso_Up	294.821	204.634	174.995	401.531	398.124
FBgn0027348	bgm	-2.41791	1.71232e-21	360Iso_Up	51.6097	14.0787	21.4603	87.8653	83.0345
FBgn0036449	bmm	-1.35948	3.89199e-08	360Iso_Up	66.7487	33.6573	46.8862	94.1204	92.3311
FBgn0034331	BomBc2	-1.60343	2.4306e-05	360Iso_Up	64.0366	18.8314	49.8253	84.4	103.09
FBgn0025583	BomS2	-1.37519	0.000504667	360Iso_Up	114.051	37.7524	99.0442	133.119	186.29
FBgn0040735	BomT2	-1.52494	0.00234298	360Iso_Up	9.43507	2.51085	8.07096	10.6895	16.469
FBgn0000206	boss	-1.16822	2.84714e-07	360Iso_Up	253.219	180.363	153.162	353.722	325.628
FBgn0027843	CAH2	-1.03677	3.37214e-05	360Iso_Up	86.4323	64.2657	56.6833	124.339	100.441
FBgn0040629	CAH5	5.57317	8.31153e-05	360Grp_Up	0.760191	1.58422	1.39959	0.0293667	0.0275862
FBgn0000261	Cat	-1.08854	1.51089e-06	360Iso_Up	243.486	150.173	183.159	331.345	309.269
FBgn0026257	cav	1.11474	0.0127695	360Grp_Up	3.9403	5.47006	5.645	2.46681	2.17931
FBgn0039007	CCAP	1.22051	0.0054985	360Grp_Up	4.03132	5.14126	6.48476	2.31997	2.17931
FBgn0038199	CCHa1	1.1183	0.000328166	360Grp_Up	10.3236	14.1684	14.9756	5.66778	6.48276
FBgn0038147	CCHa2	-1.56912	3.07539e-09	360Iso_Up	45.5693	20.1466	29.4846	71.6255	61.0207
FBgn0052499	Cda4	-2.52716	0.000412634	360Iso_Up	1.30124	0.29891	0.559835	2.52554	1.82069
FBgn0038865	cDIP	-1.66652	1.44245e-08	360Iso_Up	22.3631	8.75807	14.4624	31.8042	34.4276
FBgn0016131	Cdk4	-1.40745	1.06857e-06	360Iso_Up	11.4695	6.54614	6.95129	16.739	15.6414
FBgn0039207	Cftr	-1.78179	4.38603e-13	360Iso_Up	47.4883	24.9889	21.1338	79.5545	64.2759
FBgn0032785	CG10026	-1.23924	5.57919e-06	360Iso_Up	21.5085	12.1059	15.3955	31.3049	27.2276
FBgn0031563	CG10031	-1.81931	1.63196e-07	360Iso_Up	22.5641	6.75537	14.9289	32.1859	36.3862
FBgn0034439	CG10062	-1.70028	1.80875e-05	360Iso_Up	4.36765	2.36139	2.05273	6.95992	6.09655
FBgn0034440	CG10073	-2.69562	0.000476059	360Iso_Up	1.0543	0.328801	0.279918	1.73264	1.87586
FBgn0032801	CG10165	-1.25081	0.00577715	360Iso_Up	6.7094	2.63041	5.97157	9.57356	8.66207
FBgn0039094	CG10184	-1.22583	1.28262e-06	360Iso_Up	32.9245	19.3694	22.9532	48.1614	41.2138
FBgn0039118	CG10208	-1.15619	0.000104688	360Iso_Up	12.5712	7.47276	9.23728	17.3264	16.2483
FBgn0032783	CG10237	-1.52201	8.81672e-09	360Iso_Up	90.3149	43.4317	57.1965	151.914	108.717
FBgn0027562	CG10345	-1.85243	2.06007e-14	360Iso_Up	36.7301	16.4999	17.9614	62.1694	50.2897
FBgn0030348	CG10352	-1.75213	1.65864e-08	360Iso_Up	8.64724	4.3342	4.19876	13.8905	12.1655
FBgn0034494	CG10444	-1.1413	5.00017e-06	360Iso_Up	46.4046	33.8068	28.0384	64.9592	58.8138
FBgn0035679	CG10467	-1.27536	3.41764e-05	360Iso_Up	9.89418	5.88853	6.53141	14.3016	12.8552
FBgn0037057	CG10512	-1.11652	8.5527e-06	360Iso_Up	43.6102	25.5867	33.4035	56.9127	58.538
FBgn0039312	CG10514	-1.30636	0.0194614	360Iso_Up	2.41298	1.61412	1.35293	3.78831	2.89655
FBgn0039324	CG10553	-1.87524	8.74605e-13	360Iso_Up	26.598	12.4048	12.2231	46.8399	34.9242
FBgn0039325	CG10560	-1.89356	5.39713e-16	360Iso_Up	51.1762	22.7471	24.2129	87.0136	70.7311
FBgn0039326	CG10562	-1.03535	0.000287969	360Iso_Up	16.1478	11.3287	11.29	22.5243	19.4483
FBgn0032726	CG10621	-2.32149	7.06846e-15	360Iso_Up	84.7729	24.4509	37.229	172.97	104.441
FBgn0032836	CG10680	-2.2904	2.07022e-16	360Iso_Up	213.602	55.5077	102.496	342.915	353.49
FBgn0033821	CG10799	-2.13902	3.10081e-09	360Iso_Up	23.9712	5.55973	13.8559	38.676	37.7931
FBgn0027552	CG10863	-1.12431	1.10947e-06	360Iso_Up	145.532	87.521	108.515	200.545	185.545
FBgn0037228	CG1092	-1.53592	5.13642e-06	360Iso_Up	17.0579	6.45646	12.503	24.1688	25.1035
FBgn0034253	CG10936	-1.37587	0.00139119	360Iso_Up	4.06877	2.0027	2.89248	5.69715	5.68276
FBgn0031741	CG11034	-1.4483	0.000792203	360Iso_Up	3.89183	2.54074	1.91277	5.40348	5.71035
FBgn0039241	CG11089	-1.89169	2.11394e-08	360Iso_Up	127.446	34.9426	82.5757	187.742	204.524
FBgn0031734	CG11147	-1.60819	9.08466e-11	360Iso_Up	81.0607	45.9425	40.2615	135.997	102.041
FBgn0037070	CG11309	-1.16083	8.02678e-06	360Iso_Up	57.5325	32.3421	43.9471	83.1372	70.7035
FBgn0035550	CG11349	-4.00547	0.00990561	360Iso_Up	0.399064	0.0896731	0	0.734168	0.772414
FBgn0037454	CG1137	1.91236	2.92108e-05	360Grp_Up	3.1333	4.60322	5.50505	1.3215	1.10345
FBgn0040359	CG11380	-3.18168	0.0468433	360Iso_Up	0.326188	0.0896731	0.0466529	0.616701	0.551724
FBgn0034198	CG11400	-1.96228	1.87448e-09	360Iso_Up	22.4114	6.57603	13.3894	35.4457	34.2345
FBgn0037166	CG11426	-4.13677	3.81362e-06	360Iso_Up	347.815	20.6846	61.9084	487.341	821.324
FBgn0037164	CG11438	-1.28966	1.90667e-05	360Iso_Up	10.0819	6.3369	6.20484	14.2135	13.5724
FBgn0040637	CG11458	2.14289	0.00111053	360Grp_Up	1.65279	2.27172	3.21905	0.734168	0.386207
FBgn0037396	CG11459	-2.14934	8.784e-06	360Iso_Up	3.36801	0.956513	1.77281	4.28754	6.45517
FBgn0036264	CG11529	-1.57174	0.00140553	360Iso_Up	2.75203	1.61412	1.35293	4.31691	3.72414
FBgn0035484	CG11594	-2.11942	3.60964e-21	360Iso_Up	113.769	41.6681	50.7584	196.111	166.538
FBgn0040531	CG11741	-1.94155	0.00169306	360Iso_Up	1.8018	0.56793	1.07302	3.08351	2.48276
FBgn0039628	CG11841	-1.23985	8.83228e-05	360Iso_Up	83.5473	36.497	70.3993	113.003	114.29
FBgn0039629	CG11842	-1.4408	0.000530845	360Iso_Up	19.5565	6.18744	16.6084	24.7268	30.7035
FBgn0014427	CG11899	-1.0291	0.0136163	360Iso_Up	74.0695	28.7253	75.811	92.6521	99.0897
FBgn0039656	CG11951	-1.22209	8.8904e-06	360Iso_Up	18.0516	10.6113	12.6429	26.1658	22.7862
FBgn0037386	CG1208	-1.00498	0.00193465	360Iso_Up	10.1586	6.96461	7.46447	11.8054	14.4
FBgn0037387	CG1213	-1.21659	6.21846e-07	360Iso_Up	164.278	95.7111	116.352	249.353	195.697
FBgn0040775	CG12158	1.34988	1.52068e-05	360Grp_Up	160.337	162.727	311.175	90.4789	76.9655
FBgn0037974	CG12224	-1.46509	7.89065e-06	360Iso_Up	16.3004	6.72548	12.0365	24.3157	22.1241
FBgn0029810	CG12239	1.22408	3.41708e-07	360Grp_Up	1009.95	1210.74	1702.65	565.838	560.58
FBgn0039131	CG12268	-1.84007	6.31512e-07	360Iso_Up	5.48832	2.48096	2.70587	9.45609	7.31035
FBgn0040942	CG12643	-1.51948	0.000182415	360Iso_Up	4.98685	3.3478	2.14603	7.25358	7.2
FBgn0037779	CG12811	-1.34836	1.70296e-05	360Iso_Up	16.785	7.74178	12.6896	24.1982	22.5104
FBgn0030798	CG13003	-1.3375	7.49519e-05	360Iso_Up	9.50599	6.78527	4.71195	13.9198	12.6069
FBgn0036656	CG13026	-1.32572	0.0155411	360Iso_Up	2.37471	1.58422	1.30628	3.43591	3.17241
FBgn0036583	CG13055	1.30927	3.16844e-06	360Grp_Up	13.4688	18.8015	20.6672	6.93055	7.47586
FBgn0032770	CG13086	-2.85346	5.98092e-11	360Iso_Up	8.35218	1.04619	3.49897	14.2429	14.6207
FBgn0032084	CG13101	-1.07479	0.00700929	360Iso_Up	5.61618	3.85594	3.87219	8.28142	6.45517
FBgn0035921	CG13305	-1.05962	0.00441509	360Iso_Up	23.5358	21.5215	10.9168	32.2153	29.4897
FBgn0040827	CG13315	-1.84524	5.86545e-08	360Iso_Up	269.176	74.4885	179.894	410.929	411.393
FBgn0037627	CG13318	1.37248	4.8655e-06	360Grp_Up	23.2279	26.4237	42.5008	12.0697	11.9172
FBgn0033863	CG13337	1.65116	1.3652e-06	360Grp_Up	9.24663	11.2988	17.4482	4.40501	3.83448
FBgn0025620	CG13360	-1.64251	2.50826e-12	360Iso_Up	40.1462	22.0895	19.8275	62.1988	56.469
FBgn0014417	CG13397	-1.25692	1.52753e-06	360Iso_Up	18.2566	11.5977	11.4766	25.3729	24.5793
FBgn0034692	CG13502	1.328	0.0158957	360Grp_Up	2.90132	3.13856	5.41174	1.70327	1.35172
FBgn0034870	CG13559	-2.07145	0.00634898	360Iso_Up	1.39464	0.269019	0.933059	2.11441	2.26207
FBgn0039161	CG13606	-1.05544	0.000181248	360Iso_Up	15.8167	11.2988	10.6369	21.4965	19.8345
FBgn0039151	CG13607	-1.45543	2.08118e-07	360Iso_Up	75.3473	32.4617	54.3973	111.799	102.731
FBgn0039239	CG13641	-2.22971	0.000124218	360Iso_Up	2.56588	0.478257	1.53955	4.05261	4.1931
FBgn0035553	CG13722	-2.22307	2.46463e-09	360Iso_Up	4.84183	1.6739	2.05273	7.72345	7.91724
FBgn0031935	CG13793	-1.14383	0.0326841	360Iso_Up	2.64101	1.70379	1.81946	3.28907	3.75173
FBgn0031936	CG13794	-1.60789	6.37437e-09	360Iso_Up	19.1312	9.08688	11.3367	31.2462	24.8552
FBgn0031937	CG13795	-2.1548	3.88612e-15	360Iso_Up	17.2636	5.73908	8.07096	28.4857	26.7586
FBgn0039040	CG13833	-2.84738	1.21298e-36	360Iso_Up	77.0821	20.2063	20.8539	147.627	119.641
FBgn0035186	CG13912	-1.17687	0.00757033	360Iso_Up	10.268	3.94562	9.65716	13.5381	13.931
FBgn0036359	CG14105	-1.11524	0.017057	360Iso_Up	4.74823	2.36139	4.10546	5.49158	7.03449
FBgn0040817	CG14132	-1.3265	8.4536e-06	360Iso_Up	17.7557	12.7934	8.8174	24.1982	25.2138
FBgn0039483	CG14259	-2.40769	6.63214e-17	360Iso_Up	16.586	5.82875	5.59835	32.1859	22.731
FBgn0038632	CG14301	-1.20007	0.00202097	360Iso_Up	5.36941	3.64671	3.31236	7.87029	6.64828
FBgn0038525	CG14329	-1.09749	0.00594503	360Iso_Up	7.26793	5.38039	4.47868	7.48852	11.7241
FBgn0038510	CG14331	1.13009	0.0381769	360Grp_Up	3.53686	3.91573	6.11153	1.52707	2.5931
FBgn0038207	CG14356	1.43895	0.00556228	360Grp_Up	2.68784	3.49725	4.57199	1.46834	1.21379
FBgn0032896	CG14400	-1.77499	2.80804e-07	360Iso_Up	13.6403	4.48366	8.95736	21.2028	19.9172
FBgn0033464	CG1441	-1.76091	2.30478e-11	360Iso_Up	34.9149	14.5868	19.8741	58.4398	46.7586
FBgn0029898	CG14439	-1.21862	2.58287e-06	360Iso_Up	38.3429	23.853	25.5658	58.8216	45.1311
FBgn0034293	CG14495	-2.74106	1.70158e-05	360Iso_Up	2.35659	0.926622	0.373223	5.72651	2.4
FBgn0037126	CG14567	-1.02447	0.00812722	360Iso_Up	19.2073	8.72818	18.4746	25.461	24.1655
FBgn0031184	CG14615	-1.31614	0.000255211	360Iso_Up	6.32754	3.55703	4.24542	9.39736	8.11035
FBgn0040398	CG14629	-2.00785	1.00319e-09	360Iso_Up	206.984	54.2223	125.076	333.078	315.559
FBgn0037288	CG14661	-1.17818	1.39985e-06	360Iso_Up	152.63	96.5779	103.896	233.466	176.579
FBgn0030157	CG1468	-2.06117	1.69215e-08	360Iso_Up	65.9979	15.0352	40.588	101.168	107.2
FBgn0037845	CG14694	-1.87135	2.88113e-05	360Iso_Up	3.81139	2.18205	1.30628	6.46068	5.29655
FBgn0035734	CG14823	-1.06641	1.15544e-05	360Iso_Up	68.0668	41.1301	53.0444	89.5686	88.5242
FBgn0034390	CG15093	-2.80784	3.17942e-27	360Iso_Up	75.863	15.8721	25.7058	138.288	123.586
FBgn0034394	CG15096	-2.83832	3.92388e-21	360Iso_Up	144.802	25.0786	52.8578	249.823	251.448
FBgn0034454	CG15120	-2.87891	1.0528e-09	360Iso_Up	3.39222	0.687494	1.11967	6.98928	4.77242
FBgn0030270	CG15199	-3.22685	3.58126e-16	360Iso_Up	6.88861	0.896731	2.09938	13.3031	11.2552
FBgn0030261	CG15203	-1.3992	1.29254e-06	360Iso_Up	19.9363	9.41568	14.2291	27.1349	28.9655
FBgn0028526	CG15293	-2.86686	1.71288e-26	360Iso_Up	182.707	34.6437	61.9084	318.747	315.531
FBgn0031542	CG15414	-2.70925	1.14537e-11	360Iso_Up	6.62036	1.16575	2.75252	11.3356	11.2276
FBgn0039827	CG1544	-2.24103	6.74562e-14	360Iso_Up	23.2931	6.36679	11.43	39.2927	36.0828
FBgn0039686	CG15506	-2.19541	0.0028723	360Iso_Up	1.22996	0.56793	0.373223	2.37871	1.6
FBgn0039782	CG15539	1.09408	0.0366153	360Grp_Up	2.88204	4.03529	4.0588	1.5858	1.84828
FBgn0039811	CG15550	2.57479	0.0392323	360Grp_Up	0.591958	0.56793	1.49289	0.0587335	0.248276
FBgn0040906	CG15579	1.39382	0.0434609	360Grp_Up	1.6222	1.94292	2.89248	0.881002	0.772414
FBgn0030347	CG15739	-1.21633	1.5079e-06	360Iso_Up	24.8954	14.7363	17.4015	33.5955	33.8483
FBgn0035308	CG15822	-1.07575	0.00913345	360Iso_Up	12.3231	11.239	5.59835	17.9724	14.4828
FBgn0033798	CG15870	-1.80149	0.0261544	360Iso_Up	1.06511	0.388583	0.653141	1.6739	1.54483
FBgn0030218	CG1628	-2.46049	8.21378e-19	360Iso_Up	30.1499	7.98091	12.3164	55.9436	44.3586
FBgn0030027	CG1632	-1.31239	5.29052e-05	360Iso_Up	37.6611	29.8611	16.2819	50.129	54.3724
FBgn0031558	CG16704	-2.31078	0.0361074	360Iso_Up	15.2406	2.42117	8.77075	24.1982	25.5724
FBgn0034505	CG16739	1.63425	0.00253486	360Grp_Up	3.15903	3.22823	6.57806	1.17467	1.65517
FBgn0032322	CG16743	-1.3327	1.25385e-05	360Iso_Up	11.4883	6.03799	8.0243	15.0358	16.8552
FBgn0037678	CG16749	1.35906	0.00064086	360Grp_Up	6.5886	7.29341	12.2231	3.58274	3.25517
FBgn0029765	CG16756	-1.43753	1.38863e-06	360Iso_Up	27.9447	12.4347	20.1074	43.3747	35.8621
FBgn0035348	CG16758	-1.08799	0.00105007	360Iso_Up	246.589	112.898	225.334	298.718	349.407
FBgn0032835	CG16772	-1.92257	2.36887e-18	360Iso_Up	73.6918	34.3747	32.0972	120.433	107.862
FBgn0034480	CG16898	-2.67342	9.4081e-14	360Iso_Up	19.0967	3.31791	8.11761	35.71	29.2414
FBgn0040732	CG16926	-2.43859	1.56675e-13	360Iso_Up	149.162	30.1003	71.5189	261.951	233.076
FBgn0032387	CG16965	-1.88378	5.98579e-05	360Iso_Up	2.85338	1.19564	1.44624	4.08198	4.68966
FBgn0032281	CG17107	1.56834	0.00347687	360Grp_Up	6.00309	4.45376	13.9959	3.02477	2.53793
FBgn0032285	CG17108	-1.59612	3.32543e-07	360Iso_Up	2225.68	1190.11	1196.88	4337.56	2178.15
FBgn0039485	CG17189	-1.38758	0.00288835	360Iso_Up	3.64956	2.27172	2.05273	6.10828	4.16552
FBgn0032414	CG17211	-1.02941	0.0108842	360Iso_Up	42.7052	41.698	17.9614	52.5958	58.5655
FBgn0031168	CG1722	1.42857	3.14751e-05	360Grp_Up	6.52509	9.59502	9.93707	3.23034	3.33793
FBgn0264494	CG17646	-1.28899	1.64323e-09	360Iso_Up	110.513	67.3146	70.306	148.596	155.835
FBgn0038009	CG17738	3.74384	0.00185169	360Grp_Up	0.694579	0.597821	2.00608	0.146834	0.0275862
FBgn0033710	CG17739	-1.1123	7.54471e-07	360Iso_Up	619.769	371.934	467.136	798.159	841.849
FBgn0039856	CG1774	-1.78927	2.38731e-10	360Iso_Up	25.2217	9.59502	14.9756	40.7023	35.6138
FBgn0028480	CG17841	-1.12418	7.28194e-07	360Iso_Up	240.304	166.523	156.754	345	292.938
FBgn0030163	CG1791	-1.17356	0.000508825	360Iso_Up	8.50862	4.93202	6.29814	12.1285	10.6759
FBgn0032603	CG17928	-2.34656	2.50007e-22	360Iso_Up	45.5274	16.1412	16.3752	84.5175	65.0759
FBgn0034624	CG17974	-1.62401	0.0342664	360Iso_Up	1.35583	0.896731	0.513182	2.49617	1.51724
FBgn0035262	CG18171	1.26821	0.000483533	360Grp_Up	16.2063	17.6357	29.5313	6.87182	10.7862
FBgn0037553	CG18249	-2.75464	1.40214e-16	360Iso_Up	10.0803	2.03259	3.73223	17.5907	16.9655
FBgn0032266	CG18302	-2.49844	9.78815e-12	360Iso_Up	9.19225	3.91573	2.00608	17.3851	13.4621
FBgn0033864	CG18368	1.13343	0.0365725	360Grp_Up	3.10029	5.3505	3.40566	1.87947	1.76552
FBgn0037973	CG18547	-1.5405	2.53854e-05	360Iso_Up	25.6041	8.75807	19.6409	41.4658	32.5517
FBgn0030164	CG1889	-1.02908	0.000807993	360Iso_Up	17.8178	11.3287	13.7626	26.4007	19.7793
FBgn0026563	CG1979	-4.25293	3.1606e-29	360Iso_Up	10.3457	0.836949	1.49289	23.9633	15.0897
FBgn0033204	CG2065	-1.89687	4.03911e-15	360Iso_Up	29.1303	13.2716	13.3894	48.4258	41.4345
FBgn0030251	CG2145	-1.71262	5.65134e-08	360Iso_Up	110.42	36.3774	75.4844	171.502	158.317
FBgn0029990	CG2233	-2.84048	2.05556e-21	360Iso_Up	948.97	164.849	344.765	1726.71	1559.56
FBgn0029995	CG2256	1.13905	0.0478243	360Grp_Up	2.61165	4.03529	3.35901	1.20404	1.84828
FBgn0032864	CG2493	-1.61699	1.51364e-10	360Iso_Up	61.5734	26.603	38.8152	93.1513	87.7242
FBgn0014931	CG2678	-1.3641	0.0339703	360Iso_Up	1.841	1.3451	0.839753	2.61364	2.56552
FBgn0035090	CG2736	-2.53646	1.3109e-16	360Iso_Up	124.92	25.8557	54.5373	221.161	198.124
FBgn0031273	CG2839	5.10047	0.0336422	360Grp_Up	0.279899	0.29891	0.7931	0	0.0275862
FBgn0260474	CG30002	-1.79662	1.42547e-06	360Iso_Up	15.0088	4.36409	10.2636	21.8489	23.5586
FBgn0050026	CG30026	-2.04302	6.53032e-07	360Iso_Up	11.1287	2.54074	6.99794	16.3279	18.6483
FBgn0050046	CG30046	-1.21617	0.000106193	360Iso_Up	14.2377	7.29341	11.15	19.059	19.4483
FBgn0050148	CG30148	-1.23507	0.0425162	360Iso_Up	2.21743	1.04619	1.81946	3.02477	2.97931
FBgn0031645	CG3036	-1.61441	1.94272e-13	360Iso_Up	154.301	72.7249	91.1132	221.337	232.028
FBgn0043792	CG30427	-1.32858	7.84108e-06	360Iso_Up	12.2248	7.47276	7.46447	18.7066	15.2552
FBgn0050431	CG30431	-1.11716	0.000869268	360Iso_Up	18.8695	9.41568	16.1886	26.8118	23.0621
FBgn0029608	CG3091	-1.08461	4.22104e-06	360Iso_Up	49.2583	33.1193	34.3832	68.0134	61.5173
FBgn0051075	CG31075	-1.12969	4.27496e-06	360Iso_Up	63.561	39.0975	46.3264	92.2409	76.5793
FBgn0051103	CG31103	-1.09863	0.00028876	360Iso_Up	17.4607	13.7798	9.89042	22.6418	23.531
FBgn0051161	CG31161	1.34451	0.000289782	360Grp_Up	5.86208	8.0108	9.28393	2.76047	3.3931
FBgn0051189	CG31189	-1.05794	0.0104408	360Iso_Up	6.05333	3.22823	5.22513	7.87029	7.88966
FBgn0051205	CG31205	-1.51355	2.62178e-11	360Iso_Up	41.5592	22.2389	24.1662	60.4661	59.3655
FBgn0051251	CG31251	1.021	0.0124079	360Grp_Up	6.63288	7.23363	11.15	4.25818	3.88966
FBgn0051326	CG31326	-1.44151	6.73333e-06	360Iso_Up	96.0885	36.6763	74.9246	138.905	133.848
FBgn0051380	CG31380	-1.93711	0.00180951	360Iso_Up	2.0754	0.508148	1.39959	3.08351	3.31035
FBgn0051436	CG31436	-1.29319	1.09012e-07	360Iso_Up	30.5514	18.9808	18.9877	44.4025	39.8345
FBgn0051445	CG31445	-1.79974	4.41459e-09	360Iso_Up	40.7393	13.4809	25.9857	59.8494	63.6414
FBgn0051548	CG31548	-1.43574	4.10272e-06	360Iso_Up	44.1677	17.7852	33.6834	63.0504	62.1517
FBgn0051636	CG31636	-1.9526	5.37833e-13	360Iso_Up	13.8313	6.3369	5.92492	22.3187	20.7448
FBgn0288229	CG3164	-1.63732	1.75194e-13	360Iso_Up	220.393	114.154	117.006	360.095	290.317
FBgn0051664	CG31664	-2.33955	2.58505e-07	360Iso_Up	3.89606	0.896731	1.95942	6.54878	6.17931
FBgn0031449	CG31689	-1.24176	1.60163e-08	360Iso_Up	114.446	67.4043	78.4702	155.908	156
FBgn0028490	CG31705	-1.15131	2.1301e-07	360Iso_Up	185.315	111.643	134.78	244.713	250.124
FBgn0051769	CG31769	-1.29678	1.47301e-05	360Iso_Up	112.854	49.7686	90.7399	159.902	151.007
FBgn0051777	CG31777	-1.75027	2.56143e-07	360Iso_Up	17.3681	5.88853	11.43	28.9262	23.2276
FBgn0051778	CG31778	-1.91987	5.4236e-10	360Iso_Up	20.4468	6.63581	11.9898	33.0376	30.1241
FBgn0051815	CG31815	2.38053	0.0137337	360Grp_Up	0.974424	0.717385	2.61256	0.264301	0.303448
FBgn0051869	CG31869	-1.10242	0.000448228	360Iso_Up	33.6047	28.3068	17.1683	44.2263	44.7173
FBgn0031360	CG31937	-1.64481	8.47716e-07	360Iso_Up	59.8048	19.6384	43.154	91.2131	85.2138
FBgn0052115	CG32115	-2.26058	0.00823429	360Iso_Up	0.875755	0.328801	0.32657	1.46834	1.37931
FBgn0052191	CG32191	-2.05669	2.08818e-10	360Iso_Up	24.7714	6.87494	14.0892	39.9975	38.1242
FBgn0043783	CG32444	-2.83058	2.2472e-21	360Iso_Up	375.377	70.782	132.121	766.384	532.221
FBgn0031538	CG3246	-2.08845	1.39419e-08	360Iso_Up	77.485	17.1276	47.2128	123.751	121.848
FBgn0052512	CG32512	-2.2048	8.4165e-15	360Iso_Up	15.2957	5.94832	5.87827	28.2802	21.0759
FBgn0052687	CG32687	-1.34693	4.16295e-08	360Iso_Up	63.1526	32.3421	44.3203	88.7756	87.1724
FBgn0052695	CG32695	-1.84325	7.28547e-05	360Iso_Up	10.1349	2.21194	7.46447	14.9183	15.9448
FBgn0052755	CG32755	1.24199	0.0163876	360Grp_Up	2.911	4.72278	3.68558	1.4977	1.73793
FBgn0052816	CG32816	-1.06367	0.0301593	360Iso_Up	3.46845	2.63041	2.14603	4.90425	4.1931
FBgn0052855	CG32855	-1.43044	0.031428	360Iso_Up	2.71451	2.39128	0.699794	3.43591	4.33104
FBgn0038878	CG3301	-1.39897	2.6268e-07	360Iso_Up	135.364	63.3989	96.7115	165.07	216.276
FBgn0053120	CG33120	-2.36599	3.88536e-10	360Iso_Up	8.40413	1.88314	4.15211	14.4778	13.1035
FBgn0053301	CG33301	-4.46725	6.88286e-14	360Iso_Up	2.82776	0.119564	0.466529	5.81461	4.91035
FBgn0053307	CG33307	-1.65197	0.000111173	360Iso_Up	14.7939	3.97551	11.5699	20.2924	23.3379
FBgn0053459	CG33459	-2.94533	0.0010097	360Iso_Up	0.88952	0.328801	0.0933059	1.6739	1.46207
FBgn0053463	CG33463	4.21245	0.0297628	360Grp_Up	0.314295	0.358692	0.839753	0.0587335	0
FBgn0053493	CG33493	-1.6355	4.21332e-06	360Iso_Up	29.3339	9.44557	21.5537	45.8121	40.5242
FBgn0053494	CG33494	-1.56821	0.00089908	360Iso_Up	8.23974	2.30161	6.76467	13.2444	10.6483
FBgn0037975	CG3397	-2.47037	8.10296e-12	360Iso_Up	25.202	4.72278	12.2231	43.2278	40.6345
FBgn0054054	CG34054	-1.4458	0.0102307	360Iso_Up	2.53175	1.04619	1.91277	3.11287	4.05517
FBgn0083956	CG34120	-1.67514	1.96484e-12	360Iso_Up	137.345	68.2113	73.1518	234.141	173.876
FBgn0083974	CG34138	-3.05219	5.00787e-05	360Iso_Up	1.73821	0.119564	0.746447	2.11441	3.97242
FBgn0085194	CG34165	1.27072	0.000285966	360Grp_Up	9.59386	12.1657	15.7687	6.13765	4.30345
FBgn0085195	CG34166	-2.0129	1.04276e-10	360Iso_Up	224.054	61.6951	131.748	351.96	350.814
FBgn0085209	CG34180	-1.42404	7.79318e-06	360Iso_Up	8.53816	4.663	5.31843	12.8333	11.3379
FBgn0085244	CG34215	-1.37043	0.00034952	360Iso_Up	20.7904	7.44287	17.6348	29.3667	28.7173
FBgn0085356	CG34327	2.12221	5.38044e-07	360Grp_Up	7.09949	7.26352	16.2819	2.23187	2.62069
FBgn0085360	CG34331	-1.81302	1.07285e-10	360Iso_Up	34.8659	12.5841	20.9472	53.7118	52.2207
FBgn0085405	CG34376	-1.1893	1.31713e-06	360Iso_Up	56.4448	32.5812	41.2412	80.7292	71.2276
FBgn0085452	CG34423	1.36015	0.000638801	360Grp_Up	13.2267	12.2254	26.9654	6.46068	7.25518
FBgn0085485	CG34456	-3.40047	2.922e-19	360Iso_Up	5.73111	1.28531	0.839753	10.4546	10.3448
FBgn0031559	CG3513	-4.40742	1.37959e-05	360Iso_Up	0.899184	0.119564	0.0466529	1.52707	1.90345
FBgn0038463	CG3534	-1.46792	9.61603e-10	360Iso_Up	36.1042	18.7118	22.58	53.3594	49.7655
FBgn0031417	CG3597	-2.35167	2.13842e-13	360Iso_Up	62.2544	14.1086	30.511	111.212	93.1862
FBgn0029648	CG3603	-2.00645	1.58673e-14	360Iso_Up	18.3654	6.9945	8.91071	29.308	28.2483
FBgn0031562	CG3604	1.46041	0.00236639	360Grp_Up	4.84839	4.69289	9.93707	2.58427	2.17931
FBgn0031418	CG3609	-1.27432	3.6176e-05	360Iso_Up	87.0739	39.2768	70.3526	132.238	106.428
FBgn0040349	CG3699	-3.60121	3.73051e-29	360Iso_Up	87.1434	9.02709	20.3407	180.723	138.483
FBgn0040342	CG3706	1.43246	0.0203625	360Grp_Up	1.95759	2.42117	3.45232	0.881002	1.07586
FBgn0034800	CG3788	1.70988	0.015192	360Grp_Up	1.4484	1.79346	2.75252	0.557968	0.689655
FBgn0035091	CG3829	-1.87346	1.98202e-13	360Iso_Up	50.724	18.8612	28.3183	78.5854	77.1311
FBgn0029866	CG3842	-1.31278	9.95368e-07	360Iso_Up	28.6258	18.652	16.5618	44.6962	34.5931
FBgn0036824	CG3902	-1.35182	5.49929e-07	360Iso_Up	239.86	110.956	179.66	349.846	318.979
FBgn0038291	CG3984	-2.63815	3.1038e-08	360Iso_Up	4.75971	0.717385	2.23934	8.63382	7.44828
FBgn0037801	CG3999	-2.15879	1.85115e-08	360Iso_Up	12.4652	2.83965	7.18455	20.0575	19.7793
FBgn0038820	CG4000	-2.12307	1.86682e-24	360Iso_Up	217.759	90.0019	86.168	366.233	328.635
FBgn0058006	CG40006	-1.88079	1.0478e-07	360Iso_Up	13.0452	7.65211	4.29207	23.464	16.7724
FBgn0058160	CG40160	-1.00458	0.000110669	360Iso_Up	22.992	15.6031	17.075	29.6898	29.6
FBgn0069973	CG40485	-1.21272	7.14667e-07	360Iso_Up	73.6262	51.2631	43.7138	108.686	90.8414
FBgn0038302	CG4210	-1.43519	0.00848386	360Iso_Up	2.53547	1.19564	1.77281	4.11134	3.06207
FBgn0259101	CG42249	-2.19905	0.00075939	360Iso_Up	1.6559	0.388583	0.933059	2.81921	2.48276
FBgn0259164	CG42269	-2.2042	0.000131917	360Iso_Up	2.22643	1.16575	0.513182	4.08198	3.14483
FBgn0259229	CG42329	-1.89631	2.1295e-09	360Iso_Up	12.9675	6.90483	4.89856	22.9354	17.131
FBgn0259233	CG42331	-1.68896	3.25777e-08	360Iso_Up	9.81093	5.3206	4.66529	15.7406	13.5172
FBgn0259715	CG42369	-1.92527	2.54684e-08	360Iso_Up	151.669	39.5458	97.8778	237.195	232.055
FBgn0259992	CG42489	-2.27057	0.00355085	360Iso_Up	1.38014	0.597821	0.419876	3.28907	1.21379
FBgn0260429	CG42524	1.07614	0.0060699	360Grp_Up	7.59613	8.19014	13.1095	4.69868	4.38621
FBgn0034741	CG4269	3.06823	0.00793705	360Grp_Up	11.917	11.2689	31.7706	1.26277	3.36552
FBgn0261674	CG42709	-1.00715	8.75142e-05	360Iso_Up	23.8273	16.5895	17.2149	30.2771	31.2276
FBgn0262035	CG42846	-2.11767	5.34633e-10	360Iso_Up	8.06506	2.51085	4.10546	12.0991	13.5448
FBgn0262150	CG42876	-2.3545	1.49625e-05	360Iso_Up	2.13667	0.687494	0.839753	2.93667	4.08276
FBgn0036787	CG4306	-2.35191	1.08198e-08	360Iso_Up	5.52084	1.25542	2.75252	8.75129	9.32414
FBgn0262366	CG43064	-2.14881	5.98815e-05	360Iso_Up	2.13147	0.777167	0.933059	3.67084	3.14483
FBgn0262481	CG43071	-1.44999	0.00823429	360Iso_Up	2.31778	1.10597	1.5862	3.40654	3.17241
FBgn0262537	CG43091	-1.13256	0.00215413	360Iso_Up	7.09897	4.27442	5.27178	10.6014	8.24828
FBgn0262538	CG43092	-1.26093	1.22666e-05	360Iso_Up	18.8405	10.0135	13.8559	27.5754	23.9172
FBgn0262539	CG43093	-1.79575	1.56078e-08	360Iso_Up	10.2489	5.08148	4.80525	18.0605	13.0483
FBgn0262540	CG43094	-2.75081	0.00500388	360Iso_Up	0.706536	0.209237	0.186612	1.4096	1.02069
FBgn0262563	CG43103	-1.12006	0.000630946	360Iso_Up	18.6921	9.41568	15.9086	25.6372	23.8069
FBgn0262808	CG43179	-4.6595	0.000461536	360Iso_Up	0.65064	0.0597821	0.0466529	0.675435	1.82069
FBgn0026878	CG4325	-1.44416	0.00282811	360Iso_Up	4.3469	1.6739	3.40566	5.08045	7.22759
FBgn0038795	CG4335	-1.55373	0.000132327	360Iso_Up	14.3991	4.42387	11.4766	21.1441	20.5517
FBgn0263997	CG43740	1.11575	1.84989e-06	360Grp_Up	90.5092	115.2	140.239	50.129	56.469
FBgn0264746	CG44004	-1.33036	0.0444961	360Iso_Up	1.63762	1.0163	0.979711	2.31997	2.23448
FBgn0264748	CG44006	-1.82279	5.32559e-07	360Iso_Up	7.13422	2.57063	4.29207	11.688	9.98621
FBgn0264750	CG44008	-1.38369	0.0254155	360Iso_Up	6.43533	1.37499	6.39145	8.45762	9.51724
FBgn0264776	CG44014	-1.90376	4.23935e-06	360Iso_Up	17.6216	4.06518	12.1764	27.0174	27.2276
FBgn0039073	CG4408	-2.89781	8.58913e-17	360Iso_Up	14.2944	2.3315	5.17847	27.0468	22.6207
FBgn0035982	CG4461	-1.27098	1.31819e-07	360Iso_Up	59.3238	36.6763	37.7889	71.2437	91.5862
FBgn0035969	CG4476	-1.08995	0.0327941	360Iso_Up	4.53305	4.03529	2.09938	6.78372	5.21379
FBgn0038738	CG4572	-1.49803	1.03937e-09	360Iso_Up	77.2277	36.9154	50.1519	118.671	103.172
FBgn0029924	CG4586	1.00414	0.00604077	360Grp_Up	7.91644	9.20644	12.6429	4.93361	4.88276
FBgn0029932	CG4607	-1.28945	4.01652e-08	360Iso_Up	57.0953	36.8556	34.1966	84.2532	73.0759
FBgn0034733	CG4752	-1.01257	0.00120937	360Iso_Up	19.4022	11.4184	16.1419	27.869	22.1793
FBgn0034229	CG4847	-1.19048	9.65476e-06	360Iso_Up	372.009	193.246	293.307	549.951	451.531
FBgn0036436	CG4914	-1.74971	1.76043e-05	360Iso_Up	4.30653	1.73368	2.56591	6.63688	6.28966
FBgn0030828	CG5162	-2.02136	1.9428e-14	360Iso_Up	56.8125	19.3395	29.4846	97.7912	80.6345
FBgn0031907	CG5171	-2.388	8.73063e-17	360Iso_Up	32.6671	8.3396	14.6024	56.9127	50.8138
FBgn0030830	CG5172	2.86633	6.60247e-09	360Grp_Up	4.45359	4.9918	10.8701	1.26277	0.689655
FBgn0030575	CG5321	-1.04965	0.0026876	360Iso_Up	22.0944	10.7608	20.1541	30.0422	27.4207
FBgn0034365	CG5335	-1.16529	0.000504667	360Iso_Up	9.29355	5.14126	7.18455	12.6277	12.2207
FBgn0032213	CG5390	-1.16192	7.67961e-06	360Iso_Up	110.763	60.2005	86.5878	158.111	138.152
FBgn0034364	CG5493	-2.72988	8.72105e-16	360Iso_Up	32.961	5.58962	13.436	58.9978	53.8207
FBgn0036764	CG5535	-1.61933	8.58026e-07	360Iso_Up	16.1858	6.0081	11.2434	23.464	24.0276
FBgn0034907	CG5539	2.99554	0.0335446	360Grp_Up	0.426788	0.508148	1.02636	0.117467	0.0551724
FBgn0030603	CG5541	-1.01509	5.29956e-05	360Iso_Up	29.6501	19.6085	22.3468	37.9418	38.7035
FBgn0036759	CG5577	-1.38247	6.5736e-07	360Iso_Up	25.265	12.3749	17.8214	37.6775	33.1862
FBgn0039527	CG5639	-1.43811	1.36784e-05	360Iso_Up	9.99096	6.78527	4.71195	13.1563	15.3104
FBgn0038858	CG5793	-1.07112	3.45736e-05	360Iso_Up	62.5524	35.929	50.4785	81.8157	81.9862
FBgn0034717	CG5819	-2.33843	4.84737e-10	360Iso_Up	18.1508	3.61682	9.56385	30.512	28.9104
FBgn0038897	CG5849	-1.94613	4.20136e-05	360Iso_Up	6.24264	1.37499	4.29207	9.89659	9.4069
FBgn0032167	CG5853	-1.23336	0.000111173	360Iso_Up	20.1369	9.92382	15.9553	30.3652	24.3035
FBgn0038507	CG5863	3.78272	0.000530845	360Grp_Up	0.692893	1.0163	1.5862	0.0587335	0.110345
FBgn0027586	CG5867	-1.80831	7.30361e-13	360Iso_Up	215.437	84.5319	122.697	363.648	290.869
FBgn0036993	CG5910	-1.07814	2.42748e-05	360Iso_Up	30.2327	18.652	22.9532	38.4704	40.8552
FBgn0032494	CG5945	-1.72348	7.96958e-12	360Iso_Up	222.771	92.6921	131.281	373.868	293.241
FBgn0036997	CG5955	-1.25299	0.00166429	360Iso_Up	31.7183	11.6575	28.7382	37.6775	48.8
FBgn0031913	CG5958	-1.73174	1.24284e-07	360Iso_Up	23.7837	8.0108	15.9086	37.5601	33.6552
FBgn0029831	CG5966	-2.15017	1.79283e-10	360Iso_Up	41.8102	10.1032	23.4664	64.8711	68.8
FBgn0031914	CG5973	-1.16222	1.95144e-06	360Iso_Up	95.0241	61.5158	64.1944	143.545	110.841
FBgn0038676	CG6026	-2.16098	7.04712e-06	360Iso_Up	2.83116	1.28531	0.933059	5.05108	4.05517
FBgn0029828	CG6067	-2.07548	1.25712e-11	360Iso_Up	41.8858	11.8369	23.1865	69.5404	62.9793
FBgn0027581	CG6191	1.15475	0.032431	360Grp_Up	4.39714	4.87224	7.65108	1.64454	3.42069
FBgn0038072	CG6225	-1.2614	8.64649e-06	360Iso_Up	17.9435	12.7635	9.79711	25.0205	24.1931
FBgn0039474	CG6283	-6.9287	0.000735	360Iso_Up	0.379536	0	0	0.469868	1.04828
FBgn0037807	CG6293	-1.56606	3.37948e-06	360Iso_Up	10.7257	6.96461	4.61864	17.4438	13.8759
FBgn0033875	CG6357	-1.1823	7.0988e-07	360Iso_Up	53.106	35.66	33.87	76.8528	66.0414
FBgn0032287	CG6415	-2.6593	3.43373e-12	360Iso_Up	33.8538	5.08148	15.3022	58.6454	56.3862
FBgn0028494	CG6424	-2.14367	0.000349013	360Iso_Up	1.70665	0.747276	0.606488	2.90731	2.56552
FBgn0034162	CG6426	-1.27156	3.77527e-05	360Iso_Up	61.5062	27.3503	50.1985	87.924	80.5518
FBgn0034165	CG6435	-1.49172	5.94469e-07	360Iso_Up	17.7709	8.24993	11.8965	28.427	22.5104
FBgn0037818	CG6465	-1.43842	0.000234906	360Iso_Up	5.1521	2.80976	3.1724	8.28142	6.34483
FBgn0040606	CG6503	-1.96719	5.76312e-08	360Iso_Up	221.189	52.9669	143.038	356.365	332.386
FBgn0031926	CG6739	-1.26603	0.00471649	360Iso_Up	4.54697	3.13856	2.56591	7.51788	4.96552
FBgn0037934	CG6830	-1.64326	2.94449e-06	360Iso_Up	6.62743	3.25812	3.68558	11.0419	8.52414
FBgn0037935	CG6834	-1.3526	2.33122e-07	360Iso_Up	22.5215	14.8558	12.2697	30.6295	32.331
FBgn0032652	CG6870	-1.38283	0.000643702	360Iso_Up	11.5727	9.44557	4.19876	16.1223	16.5241
FBgn0037936	CG6908	-1.85256	3.60363e-16	360Iso_Up	91.2401	40.6219	44.9734	154.234	125.131
FBgn0036262	CG6910	-1.41902	1.89703e-08	360Iso_Up	365.599	169.751	258.597	500.585	533.462
FBgn0035896	CG6983	-1.13911	0.000259428	360Iso_Up	176.108	149.814	84.815	244.948	224.855
FBgn0038849	CG7079	-1.5493	6.74248e-07	360Iso_Up	10.7112	6.03799	5.69166	17.7081	13.4069
FBgn0037151	CG7130	1.00431	0.0467072	360Grp_Up	5.14515	4.75267	9.47054	2.93667	3.42069
FBgn0030895	CG7135	-1.29608	4.25235e-06	360Iso_Up	39.8553	28.6356	20.7139	61.4646	48.6069
FBgn0031948	CG7149	-1.08282	2.35604e-06	360Iso_Up	59.0191	41.5784	39.2818	76.7059	78.5104
FBgn0031942	CG7203	-1.4164	8.81672e-09	360Iso_Up	80.0214	39.6654	54.2574	119.846	106.317
FBgn0031970	CG7227	1.41367	0.00594503	360Grp_Up	3.18885	5.08148	4.43203	2.05567	1.18621
FBgn0032284	CG7294	2.60883	1.29822e-06	360Grp_Up	2.61235	3.13856	5.97157	0.704802	0.634483
FBgn0032283	CG7296	1.4136	6.78569e-07	360Grp_Up	134.149	155.224	245.721	77.4988	58.1517
FBgn0030968	CG7322	-1.99299	1.56752e-09	360Iso_Up	37.3464	10.3423	22.3468	61.9932	54.7035
FBgn0038716	CG7342	-2.10799	6.82959e-05	360Iso_Up	2.35399	1.10597	0.7931	4.31691	3.2
FBgn0032262	CG7384	-1.58301	0.000317079	360Iso_Up	3.86964	1.64401	2.56591	5.22728	6.04138
FBgn0036768	CG7402	-1.16362	0.0100223	360Iso_Up	4.07697	3.10867	2.23934	5.13918	5.82069
FBgn0035817	CG7409	-1.48518	2.98266e-08	360Iso_Up	64.4064	43.5811	29.0648	90.7726	94.2069
FBgn0037144	CG7458	-1.42237	0.00983089	360Iso_Up	2.22565	1.37499	1.21298	3.14224	3.17241
FBgn0034432	CG7461	-1.24763	2.51577e-08	360Iso_Up	104.523	64.2956	68.5331	152.296	132.966
FBgn0036742	CG7497	-1.25752	0.000389544	360Iso_Up	7.49234	4.93202	4.52533	11.6292	8.88276
FBgn0038256	CG7530	-1.04148	8.32078e-06	360Iso_Up	56.4567	41.1002	37.6956	72.7414	74.2897
FBgn0036157	CG7560	-1.82304	2.68161e-08	360Iso_Up	12.6882	4.48366	7.69773	21.0266	17.5448
FBgn0036698	CG7724	-1.83524	8.18334e-12	360Iso_Up	24.7623	10.432	13.0628	42.6992	32.8552
FBgn0037552	CG7800	-1.06511	0.00617974	360Iso_Up	5.88027	3.58692	4.57199	8.13459	7.22759
FBgn0037548	CG7900	-1.65235	7.58442e-08	360Iso_Up	13.0248	5.38039	8.25757	20.1162	18.3448
FBgn0038115	CG7966	-1.68221	6.66173e-11	360Iso_Up	25.4005	12.2553	13.8093	41.9651	33.5724
FBgn0034117	CG7997	-1.42989	2.00931e-07	360Iso_Up	67.2376	30.3394	48.1458	102.079	88.3862
FBgn0037607	CG8036	-2.05159	1.92699e-17	360Iso_Up	347.595	121.118	172.196	598.612	498.455
FBgn0031012	CG8051	-1.18868	0.000511888	360Iso_Up	8.34464	4.60322	6.3448	11.4237	11.0069
FBgn0037612	CG8112	-1.02871	0.00106006	360Iso_Up	48.3855	24.7498	43.4805	63.4909	61.8207
FBgn0033365	CG8170	-1.3045	0.00788094	360Iso_Up	3.5732	2.77987	1.5862	4.93361	4.99311
FBgn0034045	CG8249	-2.1142	1.45625e-14	360Iso_Up	13.105	4.9918	5.69166	21.8195	19.9172
FBgn0035791	CG8539	-2.03632	1.91773e-09	360Iso_Up	16.3548	5.97821	7.97765	33.0082	18.4552
FBgn0033320	CG8586	-1.35082	7.85487e-06	360Iso_Up	124.084	52.5783	97.9711	179.578	166.207
FBgn0040837	CG8620	2.39415	1.03962e-07	360Grp_Up	8.83202	7.74178	22.4401	2.52554	2.62069
FBgn0034479	CG8654	-1.09338	0.00206131	360Iso_Up	10.7102	6.09777	8.58414	16.2692	11.8897
FBgn0032945	CG8665	-2.29441	1.1379e-16	360Iso_Up	28.8363	8.27982	13.0628	50.7751	43.2276
FBgn0033308	CG8736	1.89379	0.000328166	360Grp_Up	7.26316	5.08148	18.3346	2.87794	2.75862
FBgn0033330	CG8746	2.32298	6.42647e-05	360Grp_Up	1.90804	2.69019	3.77889	0.528601	0.634483
FBgn0036380	CG8757	-1.17137	1.60699e-05	360Iso_Up	16.108	10.0733	11.15	21.5258	21.6828
FBgn0033733	CG8834	4.01347	0.0144103	360Grp_Up	0.401035	0.448366	1.07302	0	0.0827587
FBgn0030617	CG9095	-1.18169	0.00639875	360Iso_Up	4.89533	3.88583	2.47261	6.51942	6.70345
FBgn0035189	CG9119	-2.44773	3.69382e-17	360Iso_Up	53.7159	12.6738	23.7463	93.5331	84.9104
FBgn0038181	CG9297	-1.01669	0.00268747	360Iso_Up	183.998	169.931	89.0604	224.89	252.11
FBgn0032889	CG9331	-1.1905	5.3285e-05	360Iso_Up	98.8467	48.1246	81.2694	144.338	121.655
FBgn0037714	CG9396	-2.29485	3.56001e-17	360Iso_Up	24.8007	7.29341	11.0567	42.7286	38.1242
FBgn0034438	CG9416	-1.19927	0.000124249	360Iso_Up	13.3668	10.0135	7.27786	18.8241	17.3517
FBgn0033101	CG9436	-1.11611	4.22059e-05	360Iso_Up	85.7706	45.5838	70.5392	115.235	111.724
FBgn0037730	CG9444	-1.27416	0.00259756	360Iso_Up	6.72343	5.49995	2.84583	8.81002	9.73793
FBgn0036875	CG9449	-1.91119	1.2165e-14	360Iso_Up	33.8618	13.72	17.1216	56.854	47.7517
FBgn0031800	CG9497	-2.10472	2.44263e-20	360Iso_Up	50.6429	21.0433	20.3407	86.9255	74.2621
FBgn0031801	CG9498	-2.05259	5.94699e-16	360Iso_Up	85.0392	28.1275	43.6671	137.466	130.897
FBgn0030593	CG9512	-1.60129	6.63165e-14	360Iso_Up	211.071	106.352	119.198	327.645	291.09
FBgn0031824	CG9547	-1.45822	1.72984e-05	360Iso_Up	23.2459	8.87764	17.9614	34.0067	32.1379
FBgn0038211	CG9649	-1.24217	1.41945e-06	360Iso_Up	60.426	31.6546	45.4866	83.9008	80.6621
FBgn0031515	CG9664	-1.31116	0.00113458	360Iso_Up	6.21391	4.09507	3.54562	10.4839	6.73104
FBgn0030159	CG9689	-1.74165	5.02916e-08	360Iso_Up	14.9449	6.24723	8.67744	26.8412	18.0138
FBgn0030160	CG9691	-1.49964	7.04668e-06	360Iso_Up	320.579	111.733	249.966	466.96	453.655
FBgn0039759	CG9733	2.23211	6.40503e-05	360Grp_Up	3.20388	2.92932	7.83769	1.02784	1.02069
FBgn0003060	CG9757	5.16621	2.89755e-28	360Grp_Up	10.1826	10.9999	28.7382	0.440501	0.551724
FBgn0038160	CG9759	4.77501	1.73531e-51	360Grp_Up	91.5656	110.746	243.855	5.78525	5.87586
FBgn0031428	CG9886	-1.47365	2.70908e-08	360Iso_Up	21.8256	11.0597	13.8559	33.4487	28.9379
FBgn0032472	CG9928	-1.73342	3.40845e-06	360Iso_Up	62.1372	16.9781	45.3933	93.2394	92.938
FBgn0038142	CheA87a	1.41362	3.22177e-05	360Grp_Up	15.5176	23.0161	23.3265	10.0728	5.65517
FBgn0267435	chp	-1.55415	1.83397e-11	360Iso_Up	1393.52	864.24	657.106	2044.31	2008.44
FBgn0035398	Cht7	-1.9914	4.08215e-05	360Iso_Up	3.11212	1.64401	1.02636	5.66778	4.11035
FBgn0000317	ck	-1.25903	1.43165e-05	360Iso_Up	21.2891	15.3341	11.4766	31.8629	26.4828
FBgn0052251	Claspin	-3.02945	1.90671e-05	360Iso_Up	1.34452	0.239128	0.419876	2.76047	1.95862
FBgn0036756	Cln3	-2.1295	2.11165e-08	360Iso_Up	5.54952	2.15215	2.33265	10.5133	7.2
FBgn0035282	CNMa	1.26372	0.0142576	360Grp_Up	2.72327	4.03529	3.87219	1.46834	1.51724
FBgn0015622	Cnx99A	-1.29767	2.22511e-08	360Iso_Up	479.558	253.267	342.246	647.713	675.007
FBgn0019830	colt	-1.22077	6.14192e-05	360Iso_Up	123.136	56.2549	102.683	175.731	157.876
FBgn0000357	Cp18	1.29642	0.00367858	360Grp_Up	4.24778	5.20104	7.2312	1.9382	2.62069
FBgn0261714	Cpn	-1.73015	9.21126e-16	360Iso_Up	586.709	273.652	312.575	793.548	967.062
FBgn0015623	Cpr	-1.8919	6.83605e-17	360Iso_Up	244.366	99.9257	124.703	410.987	341.848
FBgn0030394	Cpr11A	-2.65073	4.29944e-07	360Iso_Up	2.35905	0.86684	0.513182	4.11134	3.94483
FBgn0030398	Cpr11B	1.06228	0.0244141	360Grp_Up	3.76199	4.72278	5.78496	2.08504	2.45517
FBgn0033602	Cpr47Ee	-1.57374	5.38777e-08	360Iso_Up	14.8042	7.08418	9.00401	23.8458	19.2828
FBgn0033728	Cpr49Ae	-1.64556	5.42011e-10	360Iso_Up	25.7802	15.2444	11.5699	40.0856	36.2207
FBgn0033867	Cpr50Ca	-2.01425	0.014933	360Iso_Up	1.04792	0.597821	0.279918	1.87947	1.43448
FBgn0035280	Cpr62Bb	-1.18249	0.00243154	360Iso_Up	6.39709	4.96191	3.35901	9.07432	8.19311
FBgn0036880	Cpr76Bc	-1.38246	4.6913e-05	360Iso_Up	6.73793	4.0054	4.01215	9.72039	9.2138
FBgn0039480	Cpr97Ea	1.81232	0.0342543	360Grp_Up	1.20009	1.07608	2.75252	0.557968	0.413793
FBgn0035383	CPT2	-1.6287	3.81256e-10	360Iso_Up	21.0331	9.80426	12.4097	32.0978	29.8207
FBgn0029588	CR14798	1.45451	0.0105389	360Grp_Up	2.47594	2.74998	4.71195	1.1453	1.29655
FBgn0085734	CR40450	1.63671	0.00699854	360Grp_Up	1.90789	3.10867	2.79918	0.675435	1.04828
FBgn0265541	CR44391	-1.2573	0.00664932	360Iso_Up	4.56011	2.0027	3.82554	6.34322	6.06897
FBgn0037440	CRAT	-1.0884	2.54115e-05	360Iso_Up	34.2941	21.5514	25.4258	49.0131	41.1862
FBgn0000370	crc	-1.67707	3.22514e-16	360Iso_Up	209.185	102.407	112.527	310.994	310.814
FBgn0025456	CREG	-1.2939	1.65178e-05	360Iso_Up	21.0093	10.1331	16.0953	29.8366	27.9724
FBgn0013767	Crz	1.01246	0.00110715	360Grp_Up	47.8549	50.3365	81.9225	26.1951	32.9655
FBgn0062412	Ctr1B	-1.74373	0.000104885	360Iso_Up	5.42729	1.64401	3.82554	8.95686	7.28276
FBgn0265048	cv-d	-1.04052	9.28336e-06	360Iso_Up	65.5687	46.0621	45.5799	90.7432	79.8897
FBgn0038681	Cyp12a4	-1.27482	5.38777e-08	360Iso_Up	103.442	61.3962	68.4398	156.76	127.172
FBgn0036806	Cyp12c1	-1.80067	4.52849e-08	360Iso_Up	10.4064	3.76627	6.3448	15.6525	15.8621
FBgn0050489	Cyp12d1-p	-2.712	1.16305e-19	360Iso_Up	10.514	2.77987	3.31236	16.2398	19.7241
FBgn0010383	Cyp18a1	-1.22136	5.133e-05	360Iso_Up	12.083	8.0108	7.51112	17.9137	14.8966
FBgn0031689	Cyp28d1	-1.74097	1.61813e-13	360Iso_Up	458.627	187.088	269.514	697.108	680.8
FBgn0038095	Cyp304a1	-2.71856	0.000621168	360Iso_Up	1.17266	0.149455	0.559835	1.96757	2.01379
FBgn0036910	Cyp305a1	-1.6849	2.7655e-11	360Iso_Up	35.1345	17.546	18.4279	59.3502	45.2138
FBgn0031432	Cyp309a1	-3.46053	0.000139131	360Iso_Up	32.7839	2.83965	9.23728	68.1896	50.869
FBgn0041337	Cyp309a2	-3.30737	3.44992e-25	360Iso_Up	16.1743	2.27172	4.33872	31.6867	26.4
FBgn0030367	Cyp311a1	-1.08264	0.000112097	360Iso_Up	22.2611	13.4809	17.1216	31.628	26.8138
FBgn0038236	Cyp313a1	-2.57504	1.18011e-28	360Iso_Up	130.782	44.0893	37.6489	246.798	194.593
FBgn0034053	Cyp4aa1	-1.30969	1.60679e-05	360Iso_Up	14.7265	10.432	7.65108	21.7608	19.0621
FBgn0031693	Cyp4ac1	-2.21426	3.9767e-13	360Iso_Up	45.9337	11.8667	23.6997	76.0305	72.138
FBgn0031694	Cyp4ac2	-2.07504	7.16005e-09	360Iso_Up	6.59847	2.18205	3.35901	11.3356	9.51724
FBgn0015036	Cyp4ae1	-1.15271	0.00211654	360Iso_Up	6.03933	4.39398	3.59228	8.28142	7.88966
FBgn0015032	Cyp4c3	-1.17135	5.00787e-05	360Iso_Up	15.7179	11.4782	9.14397	21.1734	21.0759
FBgn0035344	Cyp4d20	-2.26303	1.22693e-17	360Iso_Up	16.6212	6.18744	6.25149	29.1905	24.8552
FBgn0031925	Cyp4d21	-2.94267	1.2637e-30	360Iso_Up	52.2442	14.3477	11.8498	105.896	76.8828
FBgn0015033	Cyp4d8	-1.43052	7.91914e-06	360Iso_Up	14.4098	6.36679	10.4969	21.4377	19.3379
FBgn0014469	Cyp4e2	-2.24329	6.52714e-24	360Iso_Up	142.304	47.4072	60.5088	243.45	217.848
FBgn0015035	Cyp4e3	-2.09363	1.19062e-07	360Iso_Up	18.996	4.87224	10.9168	38.7054	21.4897
FBgn0010019	Cyp4g1	5.78267	1.16838e-17	360Grp_Up	3.50634	8.0108	5.78496	0.146834	0.0827587
FBgn0033395	Cyp4p2	-1.19791	0.0488244	360Iso_Up	3.35773	1.16575	3.2657	4.19944	4.8
FBgn0031726	Cyp6a16	-3.24341	0.00932965	360Iso_Up	0.498644	0.149455	0.0466529	0.998469	0.8
FBgn0288232	Cyp6a21	-1.60691	7.66228e-08	360Iso_Up	11.6511	5.58962	6.85798	18.736	15.4207
FBgn0013773	Cyp6a22	-1.50331	6.73026e-07	360Iso_Up	14.5849	6.51625	9.93707	21.5552	20.331
FBgn0013772	Cyp6a8	-2.95275	4.33897e-42	360Iso_Up	109.733	24.5704	30.3711	198.666	185.324
FBgn0013771	Cyp6a9	-1.16543	1.82963e-06	360Iso_Up	36.3506	24.6302	23.3265	51.5974	45.8483
FBgn0038194	Cyp6d5	-1.75827	2.82131e-13	360Iso_Up	256.756	111.673	141.685	439.238	334.428
FBgn0025454	Cyp6g1	-2.49091	4.80445e-16	360Iso_Up	2737.54	572.533	1234.11	4796.41	4347.09
FBgn0033696	Cyp6g2	-2.08101	3.4102e-12	360Iso_Up	26.4187	7.95102	14.0892	44.9311	38.7035
FBgn0031182	Cyp6t1	-2.35918	7.92278e-13	360Iso_Up	10.8716	2.80976	4.99186	18.9122	16.7724
FBgn0033697	Cyp6t3	-1.08417	0.000639793	360Iso_Up	12.5185	7.14396	10.077	15.8874	16.9655
FBgn0033065	Cyp6w1	-2.73134	6.18046e-36	360Iso_Up	420.164	107.488	132.681	782.389	658.097
FBgn0015038	Cyp9b1	-1.05063	0.0249069	360Iso_Up	4.56464	2.39128	4.01215	6.25512	5.6
FBgn0015039	Cyp9b2	-2.32563	2.59898e-21	360Iso_Up	91.1985	27.0215	39.0952	160.636	138.041
FBgn0000406	Cyt-b5-r	-2.60226	7.52251e-14	360Iso_Up	426.563	71.8282	192.303	723.361	718.759
FBgn0262029	d	-1.54091	0.00651213	360Iso_Up	2.2161	1.43477	0.979711	3.55338	2.89655
FBgn0023507	D2hgdh	-1.65542	1.68083e-11	360Iso_Up	177.584	75.6841	109.214	280.335	245.104
FBgn0031860	Daao2	-2.83399	2.71424e-16	360Iso_Up	22.8603	3.61682	8.8174	40.4967	38.5104
FBgn0031461	daw	-1.18086	8.11165e-06	360Iso_Up	45.4094	24.4509	35.223	61.9638	60
FBgn0030612	Dbct	-1.35071	5.15994e-06	360Iso_Up	10.4778	6.18744	6.48476	14.977	14.2621
FBgn0033735	Dera	-1.45968	7.06029e-06	360Iso_Up	15.0727	6.3369	11.0567	21.8489	21.0483
FBgn0086687	Desat1	-2.27055	7.19574e-25	360Iso_Up	1510.87	481.126	646.75	2527.57	2388.06
FBgn0264291	Det	1.19286	0.00690958	360Grp_Up	4.92249	5.41028	8.7241	2.90731	2.64828
FBgn0033215	Dgat2	-1.53977	0.000934915	360Iso_Up	3.72524	1.49455	2.65922	5.72651	5.02069
FBgn0033885	DJ-1alpha	1.70622	0.000622853	360Grp_Up	3.73139	3.82605	7.88434	1.61517	1.6
FBgn0010497	dmGlut	-1.04069	0.0282603	360Iso_Up	3.72357	2.72008	2.47261	5.31538	4.38621
FBgn0000477	DNaseII	-1.95137	1.82256e-14	360Iso_Up	44.9083	16.8287	23.2332	76.6472	62.9242
FBgn0030607	dob	-2.66917	1.06587e-15	360Iso_Up	28.8975	5.3505	11.9431	53.7999	44.4966
FBgn0004240	DptA	1.21718	0.0314573	360Grp_Up	7.76244	5.11137	17.3082	4.02324	4.6069
FBgn0260006	drd	-1.08369	0.000539042	360Iso_Up	11.8161	8.9972	7.1379	15.212	15.9172
FBgn0283461	Drs	1.14006	0.0268187	360Grp_Up	9.29172	7.05428	19.361	4.43438	6.31724
FBgn0052282	Drsl4	-1.26011	6.00172e-07	360Iso_Up	77.0677	42.9235	54.5839	117.467	93.2966
FBgn0035434	Drsl5	-1.17812	0.000137601	360Iso_Up	57.421	27.4998	48.1458	83.6658	70.3724
FBgn0284247	ds	-1.20547	0.000452325	360Iso_Up	7.78532	5.3505	4.71195	11.4237	9.65518
FBgn0035290	dsb	-1.25875	1.601e-06	360Iso_Up	49.1483	26.065	36.2027	72.4771	61.8483
FBgn0000500	Dsk	2.42612	1.60656e-21	360Grp_Up	132.011	173.996	278.145	38.0006	37.9035
FBgn0040653	Dso1	-1.42955	0.000163778	360Iso_Up	172.26	55.4778	145.79	224.215	263.559
FBgn0283531	Duox	-1.49486	3.89288e-05	360Iso_Up	5.74085	3.49725	2.93913	7.78219	8.74483
FBgn0000536	eas	-1.08413	4.43531e-06	360Iso_Up	125.884	92.0943	80.2897	177.14	154.014
FBgn0243514	eater	-1.45702	0.00031929	360Iso_Up	4.57021	2.3315	2.93913	7.10675	5.90345
FBgn0033879	Echs1	-1.01956	0.00050213	360Iso_Up	94.9878	50.6055	83.7887	125.778	119.779
FBgn0260746	Ect3	-1.98792	1.46221e-15	360Iso_Up	34.6153	14.527	15.6754	61.1415	47.1173
FBgn0052185	edin	3.0736	0.000638801	360Grp_Up	1.11174	0.896731	3.12575	0.1762	0.248276
FBgn0284245	eEF1alpha1	-1.43282	5.32559e-07	360Iso_Up	3787.96	1590.95	2821.99	5703.52	5035.37
FBgn0000559	eEF2	-1.05273	7.83618e-06	360Iso_Up	2797.98	1689.74	2204.49	3824.05	3473.66
FBgn0003731	Egfr	-1.31252	6.61651e-09	360Iso_Up	61.3713	35.7497	39.8883	88.247	81.6
FBgn0034885	Eglp4	-2.41042	1.41882e-16	360Iso_Up	149.818	35.1818	68.4398	262.245	233.407
FBgn0013949	Elal	-1.98793	1.79723e-09	360Iso_Up	44.1191	12.0461	26.6388	65.4878	72.3035
FBgn0010435	emp	-1.39814	7.61527e-10	360Iso_Up	216.488	124.855	131.095	338.775	271.228
FBgn0263916	Ent2	-1.04597	0.000167799	360Iso_Up	15.6511	10.9401	10.8701	20.3805	20.4138
FBgn0000592	Est-6	-2.5402	1.7795e-33	360Iso_Up	108.813	32.9698	36.5759	191.471	174.235
FBgn0037090	Est-Q	-2.67142	8.83232e-17	360Iso_Up	29.5496	5.79886	11.8498	56.3841	44.1655
FBgn0031055	et	-1.3115	7.5763e-05	360Iso_Up	11.0284	5.3206	8.35087	15.7112	14.731
FBgn0286783	Etf-QO	-1.08264	1.01866e-05	360Iso_Up	69.3512	41.5186	53.7442	94.4728	87.669
FBgn0004583	ex	-1.07305	0.000328132	360Iso_Up	11.5368	7.86134	8.0243	15.0064	15.2552
FBgn0000615	exu	-3.48435	0.0018093	360Iso_Up	0.602503	0.119564	0.0933059	1.20404	0.993104
FBgn0031414	eys	-1.80592	5.48533e-15	360Iso_Up	445.564	243.343	183.673	653.557	701.683
FBgn0016013	Faa	-1.36946	1.62245e-06	360Iso_Up	20.4424	10.5814	13.9959	31.951	25.2414
FBgn0033354	FANCI	1.65328	0.0014021	360Grp_Up	3.09203	3.55703	6.06488	1.61517	1.13103
FBgn0283427	FASN1	-2.18046	3.27134e-25	360Iso_Up	578.311	210.792	243.015	993.477	865.959
FBgn0026721	Fatp2	-1.59426	0.00215016	360Iso_Up	99.7291	35.7796	51.4582	167.596	144.083
FBgn0265187	Fatp3	-1.0679	0.00042773	360Iso_Up	2.87056	1.49455	1.5862	5.25665	3.14483
FBgn0034999	fat-spondin	-1.98657	6.86724e-16	360Iso_Up	17.9121	11.4782	13.2961	26.9293	19.9448
FBgn0011205	fbl	-1.10058	5.54547e-06	360Iso_Up	71.9443	43.7904	54.2107	100.728	89.0483
FBgn0032820	fbp	-1.971	6.33685e-11	360Iso_Up	77.9952	23.5541	45.3933	131.475	111.559
FBgn0011768	Fdh	-1.01237	0.000656166	360Iso_Up	88.5512	47.8555	77.8637	123.575	104.91
FBgn0038914	fit	-4.96411	2.06129e-09	360Iso_Up	57.0479	2.24183	5.645	144.249	76.0552
FBgn0030594	fiz	-3.44011	2.60267e-25	360Iso_Up	9.04517	1.58422	1.77281	18.5891	14.2345
FBgn0010470	Fkbp14	-1.16733	2.26339e-05	360Iso_Up	66.5178	34.6138	53.3709	93.5624	84.5242
FBgn0034943	Fmo-1	-1.88944	4.04305e-09	360Iso_Up	18.4421	5.88853	11.1967	29.0143	27.669
FBgn0033079	Fmo-2	-2.6469	8.22361e-25	360Iso_Up	24.7274	7.11407	7.74439	47.2511	36.8
FBgn0032773	fon	-1.72586	4.75681e-08	360Iso_Up	187.448	60.8582	127.549	260.806	300.579
FBgn0000721	for	-1.21598	2.11165e-08	360Iso_Up	94.0729	60.7386	60.5088	128.01	127.035
FBgn0038197	foxo	-1.03203	1.79487e-05	360Iso_Up	55.2167	41.4888	35.8761	71.8604	71.6414
FBgn0029769	frma	-1.80552	3.81362e-06	360Iso_Up	20.5904	5.41028	14.5557	31.7748	30.6207
FBgn0005390	fs(1)M3	1.18423	9.3008e-05	360Grp_Up	11.1118	15.2743	16.5151	5.84398	6.8138
FBgn0023441	fus	-1.39232	5.39571e-10	360Iso_Up	62.2027	36.8855	36.8092	91.8885	83.2276
FBgn0031702	fusl	-1.45049	1.23376e-08	360Iso_Up	26.0442	14.3477	15.6754	40.5261	33.6276
FBgn0001083	fw	-1.53736	5.85952e-06	360Iso_Up	17.3962	12.3749	6.67137	26.4007	24.1379
FBgn0035147	Gale	-1.07707	0.000202423	360Iso_Up	114.889	59.4832	98.9042	156.202	144.966
FBgn0263199	Galk	-2.38177	6.33815e-21	360Iso_Up	104.668	28.5459	44.9734	180.547	164.607
FBgn0263200	Galt	-1.71848	1.56752e-09	360Iso_Up	71.4184	26.9019	45.2067	118.172	95.3931
FBgn0000053	Gart	-2.67063	8.2542e-22	360Iso_Up	145.202	30.459	55.8436	259.719	234.786
FBgn0051414	Gba1b	-1.28566	8.11338e-06	360Iso_Up	31.5069	15.2743	24.1662	40.8491	45.7379
FBgn0034200	Gbp2	-2.25125	6.74562e-14	360Iso_Up	130.402	32.4916	66.2005	204.598	218.317
FBgn0039031	Gbp3	-1.84819	8.69945e-07	360Iso_Up	55.4924	14.0189	38.442	82.6674	86.8414
FBgn0036428	Gbs-70E	-1.3225	5.69995e-09	360Iso_Up	102.067	61.6951	63.448	153.94	129.186
FBgn0036208	Gcat	-1.07302	0.00147146	360Iso_Up	12.3514	6.69559	10.4036	16.8859	15.4207
FBgn0010225	Gel	-1.66545	7.07365e-12	360Iso_Up	441.143	183.591	273.153	656.464	651.366
FBgn0011770	Gip	-1.9029	2.60491e-12	360Iso_Up	37.0887	13.3314	20.6672	61.6114	52.7448
FBgn0035266	Gk2	-1.6828	9.98994e-11	360Iso_Up	41.8813	18.6221	24.3995	70.1865	54.3173
FBgn0027657	glob1	-1.20354	5.38044e-07	360Iso_Up	151.684	84.6514	112.387	215.464	194.235
FBgn0001114	Glt	-2.43226	1.01578e-15	360Iso_Up	302.55	68.3309	138.326	557.528	446.014
FBgn0040321	GNBP3	-1.81522	5.63235e-11	360Iso_Up	57.368	20.5949	34.4765	91.9179	82.4828
FBgn0038074	Gnmt	-4.43522	0.000440152	360Iso_Up	106.51	3.04889	17.8214	153.529	251.641
FBgn0001124	Got1	-1.03713	6.08143e-06	360Iso_Up	302.072	188.164	235.131	401.296	383.697
FBgn0001125	Got2	-1.62733	1.57785e-10	360Iso_Up	417.474	171.604	269.327	628.331	600.635
FBgn0013272	Gp150	-1.08386	7.79049e-07	360Iso_Up	350.369	236.558	243.762	489.984	431.173
FBgn0035468	Gr63a	-3.01405	0.0261121	360Iso_Up	0.431679	0.149455	0.0466529	0.675435	0.855173
FBgn0038029	GstD11	1.05245	0.00603297	360Grp_Up	6.01005	7.74178	9.00401	3.37717	3.91724
FBgn0063497	GstE3	-1.44786	9.33591e-09	360Iso_Up	83.8406	39.7252	57.1965	125.337	113.103
FBgn0063495	GstE5	-1.00808	0.0219667	360Iso_Up	6.37029	3.49725	5.59835	9.54419	6.84138
FBgn0063493	GstE7	-1.7191	7.02435e-11	360Iso_Up	18.0436	9.38579	8.7241	29.0437	25.0207
FBgn0063492	GstE8	-1.26581	0.000383548	360Iso_Up	11.0684	5.17115	8.86406	16.4454	13.7931
FBgn0063491	GstE9	-2.13892	1.00319e-09	360Iso_Up	103.742	24.0922	59.6691	183.895	147.31
FBgn0010226	GstS1	-1.25637	7.41396e-08	360Iso_Up	67.0298	37.9317	46.9795	93.8561	89.3518
FBgn0037696	GstZ1	-1.09061	0.0158813	360Iso_Up	4.21207	3.07878	2.65922	6.25512	4.85517
FBgn0032394	Hacd1	-1.07073	6.40503e-05	360Iso_Up	43.0476	25.4373	34.0566	61.0828	51.6138
FBgn0286508	Had1	-2.6126	7.1952e-20	360Iso_Up	172.265	36.0187	69.8861	286.384	296.773
FBgn0061356	Hao	-3.59779	6.18046e-36	360Iso_Up	61.064	7.682	12.9229	131.651	92
FBgn0030925	Hayan	-1.01653	0.000831264	360Iso_Up	19.5884	11.6276	16.1419	27.6047	22.9793
FBgn0005619	Hdc	-1.00282	3.1953e-05	360Iso_Up	117.958	92.3035	75.1112	147.92	156.497
FBgn0001187	Hex-C	-2.18301	1.00854e-08	360Iso_Up	70.946	14.1385	41.801	114.824	113.021
FBgn0027788	Hey	1.47244	0.0356613	360Grp_Up	2.08627	2.6603	3.63893	0.528601	1.51724
FBgn0014000	Hf	-2.105	5.18983e-10	360Iso_Up	41.6222	10.3423	23.933	69.0412	63.1724
FBgn0040211	hgo	-1.19223	0.000278142	360Iso_Up	22.4669	10.6412	18.8011	32.0391	28.3862
FBgn0286723	hll	-3.20796	3.75214e-11	360Iso_Up	4.36479	0.56793	1.35293	5.57968	9.95862
FBgn0031877	Hmgcl	-1.02366	0.0109727	360Iso_Up	5.90911	3.46736	4.89856	7.98775	7.28276
FBgn0001208	Hn	-2.16999	3.85623e-17	360Iso_Up	211.67	63.8771	103.569	355.866	323.366
FBgn0004914	Hnf4	-1.08817	6.24456e-06	360Iso_Up	66.893	47.3773	44.087	95.5006	80.6069
FBgn0036992	Hpd	-1.3803	7.62898e-06	360Iso_Up	179.61	73.9205	140.938	271.055	232.524
FBgn0034012	Hr51	1.13331	0.000807346	360Grp_Up	9.29771	11.1494	15.2089	5.31538	5.51724
FBgn0028374	Hug	1.95595	3.66501e-14	360Grp_Up	213.144	263.43	428.274	79.437	81.4345
FBgn0029079	icln	1.10351	0.00380234	360Grp_Up	6.49413	7.71189	10.5902	3.72958	3.94483
FBgn0020416	Idgf1	-1.56978	1.89941e-07	360Iso_Up	46.0296	17.6058	32.5637	66.7212	67.2276
FBgn0020415	Idgf2	-1.50827	1.60663e-08	360Iso_Up	101.001	43.7605	69.6062	152.267	138.372
FBgn0026415	Idgf4	-1.29926	2.87473e-07	360Iso_Up	504.069	254.642	371.404	747.501	642.731
FBgn0064237	Idgf5	-2.18284	2.5054e-09	360Iso_Up	34.1416	7.44287	19.5009	50.4227	59.2
FBgn0013763	Idgf6	-1.6911	4.3847e-08	360Iso_Up	331.479	112.6	226.78	529.6	456.938
FBgn0001248	Idh	-1.96305	5.65173e-17	360Iso_Up	374.455	139.382	192.07	627.773	538.593
FBgn0027086	IleRS	-1.37243	1.41955e-09	360Iso_Up	51.3154	30.0704	31.3041	67.7491	76.138
FBgn0031561	IM33	-1.32342	2.4196e-05	360Iso_Up	183.635	75.8933	149.849	257.458	251.338
FBgn0259918	inaF-B	-2.78455	1.39263e-27	360Iso_Up	23.5249	6.51625	6.48476	44.9605	36.1379
FBgn0085350	inaF-C	-1.59643	0.0150282	360Iso_Up	1.78404	1.22553	0.653141	2.99541	2.26207
FBgn0036816	Indy	-1.42859	7.28556e-11	360Iso_Up	92.9071	52.4887	55.7036	139.022	124.414
FBgn0027108	Inx2	-1.23648	5.87746e-06	360Iso_Up	81.1494	61.3364	42.0343	118.054	103.172
FBgn0265274	Inx3	-1.12849	3.40845e-06	360Iso_Up	47.3978	31.7443	31.9106	68.3364	57.6
FBgn0283680	IP3K2	-1.03157	1.24618e-05	360Iso_Up	60.5666	44.4779	40.4481	81.2578	76.0828
FBgn0050295	Ipk1	1.57672	8.56469e-05	360Grp_Up	22.7777	19.3993	50.6184	9.83786	11.2552
FBgn0038465	Irc	-1.10046	0.000545441	360Iso_Up	91.2472	43.1627	81.3627	120.022	120.441
FBgn0031305	Iris	-1.35361	0.000687884	360Iso_Up	7.32374	3.04889	5.87827	10.1609	10.2069
FBgn0024957	Irp-1B	-1.32083	1.92062e-09	360Iso_Up	130.08	72.9341	86.7278	174.174	186.483
FBgn0010052	Jhe	-2.80803	9.50511e-08	360Iso_Up	2.61065	0.956513	0.419876	4.84551	4.22069
FBgn0034076	Jhedup	-1.95904	0.000532363	360Iso_Up	4.5631	3.19834	0.746447	6.66625	7.64138
FBgn0010053	Jheh1	-2.11438	8.53437e-20	360Iso_Up	192.595	68.2711	88.6872	337.365	276.055
FBgn0034405	Jheh2	-1.82113	1.46221e-15	360Iso_Up	175.123	86.684	80.1497	298.513	235.145
FBgn0028425	JhI-21	-1.70474	6.95782e-08	360Iso_Up	52.5139	17.9047	35.5029	70.7445	85.9035
FBgn0039155	Kal1	-1.06385	0.000532363	360Iso_Up	28.9588	23.8829	16.002	34.2122	41.7379
FBgn0063923	Kaz1-ORFB	-1.50259	1.70158e-05	360Iso_Up	20.072	7.41298	15.2555	26.2539	31.3655
FBgn0004379	Klp67A	1.99487	0.00401522	360Grp_Up	1.47372	1.73368	3.07909	0.557968	0.524138
FBgn0266450	Kr-h1	-1.03515	0.0293759	360Iso_Up	7.0876	6.75537	3.07909	9.19179	9.32414
FBgn0037163	laza	-1.12787	1.87502e-06	360Iso_Up	60.1519	43.4018	37.2757	80.2887	79.6414
FBgn0028583	lcs	-4.32992	0.00149991	360Iso_Up	0.522276	0.0597821	0.0466529	0.851635	1.13103
FBgn0029994	Ldsdh1	-1.82939	5.30875e-13	360Iso_Up	195.962	74.608	111.827	326.323	271.09
FBgn0040092	lectin-46Cb	1.27685	0.0129433	360Grp_Up	3.58644	3.70649	6.76467	2.0263	1.84828
FBgn0284253	LeuRS	-1.04291	0.000288093	360Iso_Up	49.4295	26.9318	42.2676	61.7876	66.7311
FBgn0039354	Lgr3	1.03285	0.00394704	360Grp_Up	6.99035	10.0434	9.33059	4.22881	4.35862
FBgn0023496	Lip1	-3.28665	0.00376158	360Iso_Up	0.594882	0.179346	0.0466529	0.939736	1.21379
FBgn0024740	Lip2	-3.38719	1.30931e-17	360Iso_Up	4.85673	0.807058	1.07302	9.13306	8.4138
FBgn0033593	Listericin	2.60608	2.08685e-14	360Grp_Up	115.392	127.635	274.552	36.6497	22.731
FBgn0032253	LManI	-1.35046	0.000143891	360Iso_Up	12.7424	5.3505	10.1703	17.297	18.1517
FBgn0027611	LManII	-2.4015	3.39253e-21	360Iso_Up	290.473	76.7004	124.89	493.625	466.676
FBgn0263330	lncRNA:CR43411	-2.45805	3.15623e-10	360Iso_Up	5.37472	1.28531	2.3793	8.86875	8.96552
FBgn0263336	lncRNA:CR43417	-1.96616	1.07251e-08	360Iso_Up	7.73077	3.19834	3.63893	14.1548	9.93104
FBgn0263406	lncRNA:CR43452	-1.63642	0.000859555	360Iso_Up	2.70772	1.43477	1.39959	3.58274	4.41379
FBgn0263660	lncRNA:CR43651	1.85408	0.0155518	360Grp_Up	1.25748	1.46466	2.56591	0.557968	0.441379
FBgn0264571	lncRNA:CR43943	1.30924	0.032739	360Grp_Up	2.18227	3.6766	2.70587	0.939736	1.4069
FBgn0264835	lncRNA:CR44043	3.28392	0.0457059	360Grp_Up	0.339751	0.358692	0.886406	0.0587335	0.0551724
FBgn0264984	lncRNA:CR44135	-2.0825	0.00127299	360Iso_Up	1.48102	0.657603	0.559835	2.55491	2.15172
FBgn0265931	lncRNA:CR44720	1.54908	0.0267498	360Grp_Up	1.48465	1.88314	2.65922	0.734168	0.662069
FBgn0266095	lncRNA:CR44832	1.34335	6.5736e-07	360Grp_Up	49.3276	57.8093	87.7542	26.3126	25.4345
FBgn0266168	lncRNA:CR44874	-2.9873	0.000761396	360Iso_Up	0.976566	0.0896731	0.419876	1.87947	1.51724
FBgn0266315	lncRNA:CR44980	-2.95024	0.034846	360Iso_Up	0.414105	0.149455	0.0466529	0.881002	0.579311
FBgn0267656	lncRNA:CR45994	1.94176	0.000117284	360Grp_Up	3.90263	4.30431	8.35087	1.87947	1.07586
FBgn0267665	lncRNA:CR46003	1.1517	0.00788073	360Grp_Up	4.90048	8.07058	5.83162	2.55491	3.14483
FBgn0267666	lncRNA:CR46004	1.57919	0.00114132	360Grp_Up	2.87846	3.94562	4.89856	1.26277	1.4069
FBgn0287620	lncRNA:CR46489	4.16704	0.046081	360Grp_Up	0.308638	0.149455	1.02636	0.0587335	0
FBgn0267429	lovit	-1.19566	5.48986e-06	360Iso_Up	89.3521	67.494	48.5657	127.804	113.545
FBgn0034660	Loxl2	-1.31625	0.00284619	360Iso_Up	3.95835	2.77987	2.05273	5.81461	5.18621
FBgn0030608	Lsd-2	-1.17092	7.67644e-08	360Iso_Up	190.749	122.434	128.809	269.851	241.904
FBgn0002563	Lsp1beta	-3.67563	7.69819e-34	360Iso_Up	13.7496	1.70379	2.75252	25.5491	24.9931
FBgn0002565	Lsp2	-8.90597	2.78602e-26	360Iso_Up	384.444	1.55433	2.00608	1183.57	350.648
FBgn0034140	Lst	-3.11301	2.23247e-23	360Iso_Up	39.4354	5.76897	12.2697	64.2544	75.4483
FBgn0268063	ltl	-1.29567	3.047e-07	360Iso_Up	108.746	73.7412	61.162	169.652	130.428
FBgn0039877	Mccc1	-1.03603	0.000993609	360Iso_Up	11.7591	7.14396	9.37724	15.0945	15.4207
FBgn0042083	Mccc2	-1.0691	0.000667155	360Iso_Up	13.9214	8.30971	10.9634	19.9987	16.4138
FBgn0020633	Mcm7	-2.0119	0.0307527	360Iso_Up	0.852604	0.239128	0.513182	1.52707	1.13103
FBgn0023549	Mct1	-1.31566	5.69389e-06	360Iso_Up	13.7378	7.74178	9.19063	20.5567	17.4621
FBgn0262782	Mdh1	-1.0982	7.95056e-05	360Iso_Up	449.023	234.017	378.822	621.048	562.207
FBgn0004797	mdy	-1.34729	1.96222e-06	360Iso_Up	19.8252	9.92382	14.1825	28.5738	26.6207
FBgn0030993	Mec2	1.47237	0.00215124	360Grp_Up	6.80816	5.79886	14.789	3.58274	3.06207
FBgn0063667	meep	-2.35383	0.0145873	360Iso_Up	0.756636	0.29891	0.233265	1.55644	0.937931
FBgn0030731	Mfe2	-1.13082	1.19611e-06	360Iso_Up	101.322	61.6652	74.4114	141.929	127.283
FBgn0027579	mino	-2.04919	3.12915e-16	360Iso_Up	156.124	51.5023	80.4763	250.557	241.959
FBgn0051217	modSP	-1.43743	5.66395e-09	360Iso_Up	54.9288	27.4699	36.3426	83.0198	72.8828
FBgn0027930	MP1	-1.36202	6.21846e-07	360Iso_Up	63.5619	29.6519	47.0261	91.8592	85.7104
FBgn0038662	Mpc1	-1.38585	2.09056e-10	360Iso_Up	71.7276	42.5051	42.7341	102.637	99.0345
FBgn0026409	Mpcp2	-1.42785	1.41789e-11	360Iso_Up	1217.98	753.404	663.498	1714.87	1740.14
FBgn0259985	Mppe	-1.17657	5.38777e-08	360Iso_Up	188.413	128.203	119.012	244.948	261.49
FBgn0011581	Ms	1.38218	4.6137e-07	360Grp_Up	313.783	350.532	581.762	150.974	171.862
FBgn0013674	mt:CoI	-1.06047	0.00049949	360Iso_Up	3207.89	2789.88	1643.49	4446.92	3951.28
FBgn0013675	mt:CoII	-1.00797	2.5213e-06	360Iso_Up	1326.86	957.32	924.101	1754.28	1671.75
FBgn0013676	mt:CoIII	-1.42747	6.31952e-09	360Iso_Up	1399.87	945.005	682.719	2078.05	1893.71
FBgn0013678	mt:Cyt-b	-1.12105	0.000146619	360Iso_Up	1520.16	1264.69	779.57	2203.33	1833.05
FBgn0085453	Mthfs	-1.41927	0.000487599	360Iso_Up	23.7946	7.59232	20.434	32.4209	34.731
FBgn0028956	mthl3	-1.95052	0.00120029	360Iso_Up	1.86842	0.986404	0.653141	3.40654	2.42759
FBgn0052475	mthl8	-7.52147	4.99361e-06	360Iso_Up	1.53831	0.029891	0	3.17161	2.95173
FBgn0266369	Mtp	-1.42754	4.55802e-09	360Iso_Up	55.4949	27.8286	36.9491	81.6983	75.5035
FBgn0028479	Mtpalpha	-1.14428	5.78537e-06	360Iso_Up	142.851	79.4504	111.361	201.338	179.255
FBgn0052602	Muc12Ea	2.4588	0.0111714	360Grp_Up	0.756743	1.0163	1.5862	0.1762	0.248276
FBgn0032151	nAChRalpha6	1.15897	1.89941e-07	360Grp_Up	665.061	973.88	918.223	347.203	420.938
FBgn0026403	Ndg	-1.7047	0.00779543	360Iso_Up	3.73543	2.27172	1.49289	8.72192	2.45517
FBgn0002930	nec	-1.1663	2.78804e-06	360Iso_Up	184.79	100.494	143.738	242.158	252.773
FBgn0030425	Nep6	-2.64358	9.6793e-21	360Iso_Up	44.1031	9.47546	17.2149	73.4462	76.2759
FBgn0039564	Nep7	-1.94893	1.69519e-09	360Iso_Up	12.6612	4.09507	7.27786	19.382	19.8897
FBgn0033742	Nepl10	-1.70724	1.21948e-07	360Iso_Up	7.72897	4.06518	3.73223	12.3047	10.8138
FBgn0037230	Nepl11	-1.88233	9.33591e-09	360Iso_Up	179.217	50.8447	115.233	281.686	269.104
FBgn0037727	Nepl12	-2.14499	7.38515e-10	360Iso_Up	6.31672	2.15215	2.93913	10.6308	9.54483
FBgn0039022	Nepl13	-2.56547	2.34505e-14	360Iso_Up	11.7255	2.54074	4.94521	20.8504	18.5655
FBgn0039023	Nepl14	-2.12068	4.11638e-11	360Iso_Up	13.4074	3.97551	6.99794	22.8767	19.7793
FBgn0039024	Nepl15	-1.20023	9.42024e-06	360Iso_Up	68.2832	35.2415	53.6975	96.4697	87.7242
FBgn0039609	Nepl17	-2.11601	0.00812722	360Iso_Up	1.07356	0.328801	0.559835	2.0263	1.37931
FBgn0039611	Nepl18	-2.72733	1.24578e-14	360Iso_Up	39.4666	6.6657	16.1419	79.114	55.9448
FBgn0039612	Nepl19	-1.32433	0.000700448	360Iso_Up	9.99815	4.18475	8.16426	15.5056	12.1379
FBgn0027578	Nepl21	-2.3745	7.63022e-18	360Iso_Up	55.9715	14.5868	24.9593	97.9674	86.3724
FBgn0031805	Nepl4	-1.2868	0.00165831	360Iso_Up	15.7725	6.24723	13.5293	16.8859	26.4276
FBgn0259716	Nepl6	-2.26736	3.96284e-11	360Iso_Up	16.388	3.88583	8.49083	26.665	26.5104
FBgn0032613	Nepl9	-2.27453	1.51827e-10	360Iso_Up	11.5079	2.74998	5.92492	18.736	18.6207
FBgn0263390	Nha2	-1.42052	1.88202e-08	360Iso_Up	23.33	12.5243	14.789	34.0067	32
FBgn0036101	NijA	-1.31127	0.000227703	360Iso_Up	7.10554	4.54344	4.19876	11.1006	8.57931
FBgn0028936	NimB5	-1.24043	0.000267362	360Iso_Up	8.99	4.663	6.85798	12.2459	12.1931
FBgn0002937	ninaB	-1.61624	7.3974e-12	360Iso_Up	118.483	70.6325	54.6772	180.429	168.193
FBgn0002938	ninaC	-1.05287	9.52346e-06	360Iso_Up	3789.05	2955.69	2303.39	4893.79	5003.34
FBgn0002939	ninaD	-2.78504	5.46541e-17	360Iso_Up	7.79899	2.24183	2.05273	15.0945	11.8069
FBgn0037896	ninaG	-1.44563	3.3565e-07	360Iso_Up	81.8836	35.122	59.6691	108.716	124.028
FBgn0010222	Nmdmc	-1.16764	0.00283509	360Iso_Up	78.4534	29.9209	73.9449	92.1822	117.766
FBgn0016919	nompB	1.03354	8.53782e-05	360Grp_Up	20.99	29.2334	28.9715	12.569	13.1862
FBgn0039800	Npc2g	-1.88617	6.55651e-07	360Iso_Up	219.242	52.1001	150.829	340.713	333.324
FBgn0039801	Npc2h	-2.1706	1.43248e-10	360Iso_Up	168.327	38.6192	94.7521	266.973	272.966
FBgn0027109	NPF	1.42293	1.79053e-07	360Grp_Up	54.9829	63.9369	100.63	27.2817	28.0828
FBgn0287423	Nplp2	-2.17256	4.23447e-11	360Iso_Up	993.181	233.031	552.557	1632.79	1554.35
FBgn0042201	Nplp3	-1.13717	5.08041e-07	360Iso_Up	203.851	137.469	135.2	294.431	248.304
FBgn0015776	nrv1	-1.19209	4.04793e-08	360Iso_Up	124.969	82.7683	80.1031	172.618	164.386
FBgn0022774	Oat	-1.47168	8.11868e-08	360Iso_Up	40.1808	18.2036	27.7585	61.4646	53.2966
FBgn0011283	Obp28a	-1.62126	9.05146e-05	360Iso_Up	7.21947	4.81246	2.75252	13.0095	8.30345
FBgn0034468	Obp56a	2.38195	5.17629e-13	360Grp_Up	8.75099	12.2553	17.5882	2.76047	2.4
FBgn0046880	Obp56b	6.47188	0.00735695	360Grp_Up	0.263156	0.119564	0.933059	0	0
FBgn0043535	Obp57a	-1.87665	1.29859e-08	360Iso_Up	8.44955	4.15485	3.63893	14.8596	11.1448
FBgn0050145	Obp57e	1.91108	0.04635	360Grp_Up	0.896062	1.16575	1.72616	0.499235	0.193104
FBgn0046876	Obp83ef	-1.26884	0.00603297	360Iso_Up	3.94658	1.88314	3.12575	5.31538	5.46207
FBgn0011282	Obp84a	-3.79772	0.00677779	360Iso_Up	0.461709	0.119564	0	0.734168	0.993104
FBgn0039678	Obp99a	-7.42156	0.00472194	360Iso_Up	65.0221	0.388583	1.30628	255.138	3.25517
FBgn0039685	Obp99b	-3.28266	0.0330059	360Iso_Up	160.899	8.48905	57.7097	267.825	309.573
FBgn0031097	obst-A	-1.77265	2.06611e-07	360Iso_Up	6.96147	3.73638	3.03244	11.3943	9.68276
FBgn0027600	obst-B	-1.17237	0.0247116	360Iso_Up	4.99613	1.94292	4.71195	7.37105	5.95862
FBgn0013307	Odc1	-1.42834	0.00011772	360Iso_Up	24.9045	8.75807	20.434	35.9155	34.5104
FBgn0004646	ogre	-1.21082	1.51373e-06	360Iso_Up	75.8741	55.5973	42.2676	106.983	98.6483
FBgn0034935	Orcokinin	1.71572	1.69215e-08	360Grp_Up	177.461	186.371	370.657	75.3257	77.4897
FBgn0010401	OS9	-1.6834	0.000511888	360Iso_Up	14.1669	7.53254	4.57199	22.9354	21.6276
FBgn0042129	Os-C	-2.00772	1.52414e-10	360Iso_Up	4.35482	3.07878	1.30628	7.04802	5.98621
FBgn0053970	osy	-1.80478	8.87048e-10	360Iso_Up	29.1797	15.095	12.9229	54.3285	34.3724
FBgn0259834	out	-1.30368	8.02788e-07	360Iso_Up	20.3033	12.8233	12.2697	30.189	25.931
FBgn0038516	P5cr-2	-1.55772	5.83891e-06	360Iso_Up	38.9794	13.5107	29.298	61.0534	52.0552
FBgn0037146	P5CS	-1.77428	3.33515e-09	360Iso_Up	468.202	153.789	305.11	728.971	684.938
FBgn0020513	Paics	-2.00558	4.37197e-16	360Iso_Up	205.129	69.945	107.535	313.989	329.048
FBgn0036007	path	-1.49606	3.58634e-13	360Iso_Up	208.543	115.021	119.758	301.684	297.71
FBgn0027580	PCB	-1.47536	1.71696e-12	360Iso_Up	305.522	161.711	186.005	439.532	434.842
FBgn0034356	Pepck2	-1.73791	3.80867e-07	360Iso_Up	27.0677	8.75807	18.3813	45.0486	36.0828
FBgn0022770	Peritrophin-A	-1.75542	0.00106006	360Iso_Up	2.21794	0.986404	1.21298	3.58274	3.08966
FBgn0000052	Pfas	-1.90039	8.40735e-12	360Iso_Up	113.492	37.6926	66.3871	181.751	168.138
FBgn0004654	Pgd	-1.62824	4.11638e-11	360Iso_Up	121.847	54.3718	74.2715	197.668	161.076
FBgn0030239	Pgls	-1.2429	6.79754e-06	360Iso_Up	29.9492	15.8124	22.4401	43.6683	37.8759
FBgn0003076	Pgm1	-1.2818	1.50321e-07	360Iso_Up	254.941	133.015	186.192	368.171	332.386
FBgn0035977	PGRP-LF	1.06312	0.00757033	360Grp_Up	7.97532	8.30971	13.9959	4.93361	4.66207
FBgn0043578	PGRP-SB1	-1.36664	0.00115072	360Iso_Up	51.5933	15.633	46.6529	73.3287	70.7586
FBgn0004959	phm	-2.40935	0.00243154	360Iso_Up	1.07662	0.328801	0.419876	2.26124	1.29655
FBgn0043791	phu	1.55428	1.23286e-06	360Grp_Up	43.1733	44.5078	87.6608	20.0281	20.4966
FBgn0037819	Phyhd1	-1.29498	1.81281e-07	360Iso_Up	48.5115	26.2742	34.1033	70.7445	62.9242
FBgn0034909	pippin	-1.38214	7.32379e-10	360Iso_Up	77.1197	43.1627	48.7523	113.943	102.621
FBgn0034647	pirk	1.62652	8.34278e-06	360Grp_Up	6.5859	8.22004	12.1764	2.99541	2.95173
FBgn0026576	Pisd	-1.4429	2.98326e-09	360Iso_Up	83.4706	41.4589	55.1438	108.011	129.269
FBgn0038140	PK2-R1	1.28886	0.00049963	360Grp_Up	20.6059	25.2579	34.8964	7.40042	14.869
FBgn0032402	PLCXD	-1.09705	1.76159e-06	360Iso_Up	58.8213	40.8312	39.2351	74.474	80.7449
FBgn0259113	PolA1	-2.10508	0.0037809	360Iso_Up	1.22426	0.448366	0.559835	2.26124	1.62759
FBgn0003130	Poxn	1.08385	0.020545	360Grp_Up	3.60569	5.11137	4.99186	2.08504	2.23448
FBgn0031802	ppk7	-2.40566	0.0256376	360Iso_Up	0.655222	0.29891	0.139959	1.4096	0.772414
FBgn0027945	ppl	-1.11694	3.14751e-05	360Iso_Up	59.0604	32.4916	47.446	81.9038	74.4
FBgn0041194	Prat2	-2.0723	6.62034e-18	360Iso_Up	142.092	48.6925	69.8861	237.43	212.359
FBgn0033518	Prx2540-2	-1.58541	2.41738e-06	360Iso_Up	15.4721	5.76897	11.0101	21.937	23.1724
FBgn0261976	Psf2	-1.35634	0.00783987	360Iso_Up	3.95741	1.52444	3.31236	6.13765	4.85517
FBgn0030926	psh	-1.53443	7.11678e-08	360Iso_Up	21.5261	9.56513	14.3224	32.9201	29.2966
FBgn0035770	pst	-1.31526	4.16295e-08	360Iso_Up	180.442	94.8742	127.456	265.563	233.876
FBgn0003162	Pu	-1.27965	4.58879e-08	360Iso_Up	136.437	91.1677	79.4033	203.923	171.255
FBgn0020385	pug	-2.84073	1.15802e-21	360Iso_Up	219.291	38.948	78.8901	409.754	349.573
FBgn0025382	Rab27	1.04907	0.00105678	360Grp_Up	43.0333	44.2088	75.671	23.2878	28.9655
FBgn0002567	Rab32	-1.21961	4.576e-06	360Iso_Up	153.328	116.904	80.0098	217.255	199.145
FBgn0030479	Rbp1-like	1.02054	1.21598e-05	360Grp_Up	536.321	802.993	679.453	307.029	355.807
FBgn0038946	rdhB	-1.26061	2.59833e-07	360Iso_Up	102.283	72.6352	56.2634	146.246	133.986
FBgn0033667	reb	-1.45145	0.0488244	360Iso_Up	1.29892	0.747276	0.746447	1.90884	1.7931
FBgn0040074	retinin	-1.16543	4.17209e-07	360Iso_Up	218.593	149.306	139.212	320.391	265.462
FBgn0014019	Rh5	-1.11313	7.94212e-07	360Iso_Up	200.035	122.284	148.496	272.641	256.717
FBgn0032415	rho-6	-1.82258	0.0289613	360Iso_Up	0.972857	0.418475	0.513182	1.4977	1.46207
FBgn0011705	rost	-1.9258	2.77194e-08	360Iso_Up	12.0143	4.81246	6.06488	23.5521	13.6276
FBgn0029745	Rpn13R	1.76062	0.00221991	360Grp_Up	2.13589	3.79616	2.93913	0.704802	1.10345
FBgn0038277	RpS5b	1.8511	0.0249842	360Grp_Up	1.27893	1.25542	2.84583	0.352401	0.662069
FBgn0029950	rumpel	-1.36724	3.29442e-06	360Iso_Up	18.2309	12.7635	9.00401	26.5769	24.5793
FBgn0003308	ry	-1.12902	4.40318e-06	360Iso_Up	47.9365	28.7253	35.7361	66.4569	60.8276
FBgn0019932	SamDC	-1.16626	4.10272e-06	360Iso_Up	24.1933	14.9754	16.9817	32.5677	32.2483
FBgn0025697	santa-maria	-1.28953	2.74838e-09	360Iso_Up	102.152	64.7141	62.4216	143.515	137.959
FBgn0034276	Sardh	-2.56587	1.97749e-19	360Iso_Up	35.681	8.10047	14.5091	58.7628	61.3517
FBgn0037298	Sccpdh1	-1.06307	5.7471e-05	360Iso_Up	182.25	105.216	147.47	263.126	213.186
FBgn0035298	SCOT	-1.12545	0.000132327	360Iso_Up	38.036	19.5487	31.7706	49.5417	51.2828
FBgn0036727	SecCl	-1.15828	1.03332e-05	360Iso_Up	19.9691	12.7934	13.6693	27.869	25.5448
FBgn0019929	Ser7	-1.25495	1.20106e-07	360Iso_Up	60.6199	34.6736	42.1742	87.4248	78.2069
FBgn0263006	SERCA	-1.46404	1.50321e-07	360Iso_Up	967.72	686.507	416.984	1309.82	1457.57
FBgn0003388	shd	-2.41802	0.000412634	360Iso_Up	1.45989	0.687494	0.279918	2.55491	2.31724
FBgn0029823	Shmt	-1.69974	1.08579e-06	360Iso_Up	219.462	64.8635	158.993	334.487	319.504
FBgn0039593	Sid	-1.84728	0.0027358	360Iso_Up	2.48606	0.657603	1.72616	2.76047	4.8
FBgn0037236	Skp2	-1.30035	0.0203444	360Iso_Up	2.41231	1.19564	1.81946	3.40654	3.22759
FBgn0038257	smp-30	-2.19478	4.78084e-19	360Iso_Up	61.8908	19.758	28.5516	104.164	95.0897
FBgn0065099	snRNA:7SKa	1.36204	0.0139407	360Grp_Up	2.44156	2.9891	4.24542	1.26277	1.26897
FBgn0031646	snsl	-2.11969	4.91002e-08	360Iso_Up	4.34981	1.79346	1.72616	7.34168	6.53793
FBgn0039594	snu	-1.22694	1.3267e-06	360Iso_Up	148.432	108.235	81.8759	218.9	184.717
FBgn0024289	Sodh-1	-3.48433	2.45566e-26	360Iso_Up	212.133	22.5976	54.2107	429.929	341.793
FBgn0030242	sofe	1.3222	0.0387621	360Grp_Up	2.03961	3.04889	2.93913	0.763535	1.4069
FBgn0034903	sona	-1.30435	0.000328166	360Iso_Up	7.7622	5.61951	3.91885	11.7173	9.79311
FBgn0039102	SPE	-1.28142	1.46946e-05	360Iso_Up	100.581	45.5838	80.5696	145.219	130.952
FBgn0033170	sPLA2	-1.46544	0.00197655	360Iso_Up	6.32266	2.0027	5.31843	8.36952	9.6
FBgn0028988	Spn42Dd	-1.06788	0.000166854	360Iso_Up	41.5249	22.6873	34.8031	53.2713	55.338
FBgn0024293	Spn43Ab	-1.4025	1.0159e-06	360Iso_Up	223.215	94.8144	169.07	304.533	324.441
FBgn0044011	Spn43Ad	-1.12364	0.0207748	360Iso_Up	3.40416	2.03259	2.56591	4.05261	4.96552
FBgn0267347	squ	-2.9939	1.94956e-05	360Iso_Up	1.31627	0.239128	0.419876	2.26124	2.34483
FBgn0003507	srp	-1.72143	2.11165e-08	360Iso_Up	29.9671	10.6711	19.5942	47.3685	42.2345
FBgn0037684	Srr	-1.44733	0.000774051	360Iso_Up	8.39152	2.92932	6.85798	13.1857	10.5931
FBgn0052667	ssp7	-2.04778	1.35946e-07	360Iso_Up	53.341	11.4782	33.87	89.8916	78.1242
FBgn0010278	Ssrp	1.03352	0.00177809	360Grp_Up	37.145	36.5567	66.6204	22.2306	23.1724
FBgn0286203	stw	-1.11238	0.0028918	360Iso_Up	8.32916	5.97821	5.27178	13.1563	8.91035
FBgn0086450	su(r)	-1.52093	1.15391e-07	360Iso_Up	39.8842	16.739	27.8051	60.7304	54.2621
FBgn0033782	sug	-1.37144	7.35061e-06	360Iso_Up	12.5694	6.87494	8.21091	19.8813	15.3104
FBgn0028562	sut2	1.43978	0.00485162	360Grp_Up	3.08861	4.87224	4.38537	1.9382	1.15862
FBgn0038398	sxe2	-2.93795	3.42135e-38	360Iso_Up	102.314	27.7389	23.7463	195.7	162.069
FBgn0086367	t	-1.22354	1.45169e-08	360Iso_Up	616.678	420.119	371.311	816.219	859.062
FBgn0017482	T3dh	-1.6887	2.70908e-08	360Iso_Up	9.89595	4.54344	5.59835	15.5937	13.8483
FBgn0023477	Taldo	-1.64539	2.44301e-10	360Iso_Up	216.437	88.8362	137.766	345.323	293.821
FBgn0030558	Tat	-1.1522	0.0357361	360Iso_Up	2.57279	1.73368	1.67951	3.78831	3.08966
FBgn0041182	Tep2	-1.31657	7.52144e-07	360Iso_Up	208.51	98.76	158.107	285.063	292.11
FBgn0023479	teq	-1.75578	1.31944e-17	360Iso_Up	194.803	93.4095	98.7176	300.657	286.428
FBgn0035199	tfc	-1.07647	0.00601774	360Iso_Up	6.77898	5.52984	3.73223	9.19179	8.66207
FBgn0262624	Tmhs	-1.13597	0.020545	360Iso_Up	3.28009	2.45107	1.91277	4.28754	4.46897
FBgn0039298	to	-1.65131	1.0876e-09	360Iso_Up	46.2403	23.9128	24.2595	82.1681	54.6207
FBgn0261575	tobi	-5.30734	5.3924e-05	360Iso_Up	68.6096	2.89943	4.61864	226.976	39.9448
FBgn0028396	TotA	-3.09399	5.93624e-41	360Iso_Up	71.6935	14.0488	18.9411	130.888	122.897
FBgn0044812	TotC	-2.39977	4.93106e-13	360Iso_Up	12.8004	3.04889	5.92492	19.9106	22.3172
FBgn0044810	TotX	-2.56664	3.95773e-09	360Iso_Up	4.33097	0.956513	1.81946	6.07891	8.46897
FBgn0035719	tow	1.03585	1.49224e-06	360Grp_Up	194.876	264.835	275.905	116.557	122.207
FBgn0038343	Trissin	1.11739	0.000582089	360Grp_Up	44.5219	44.8664	80.9428	23.699	28.5793
FBgn0003867	tsl	-1.71474	3.88124e-14	360Iso_Up	49.201	22.7172	26.9187	75.0026	72.1655
FBgn0031850	Tsp	-1.34935	1.28406e-07	360Iso_Up	85.3174	58.4968	44.5535	130.33	107.89
FBgn0031854	TTLL3A	1.19366	0.0103257	360Grp_Up	3.90397	4.90213	6.29814	1.8501	2.56552
FBgn0031957	TwdlE	-1.69602	0.00589776	360Iso_Up	2.06314	1.40488	0.653141	3.43591	2.75862
FBgn0035978	UGP	-1.44215	1.43248e-10	360Iso_Up	145.234	76.0129	92.1395	219.017	193.766
FBgn0032684	Ugt301D1	-1.83922	1.51827e-10	360Iso_Up	12.9331	5.52984	6.71802	21.5258	17.9586
FBgn0040259	Ugt302C1	-1.01967	2.2677e-05	360Iso_Up	49.9339	35.0024	35.4562	68.8356	60.4414
FBgn0040251	Ugt302K1	-2.64984	0.0353672	360Iso_Up	0.50727	0.239128	0.0466529	0.998469	0.744828
FBgn0040256	Ugt35C1	-2.44679	2.87368e-31	360Iso_Up	90.5457	30.728	30.2777	155.908	145.269
FBgn0040255	Ugt35E2	-1.17664	0.00606215	360Iso_Up	6.21944	5.20104	2.89248	8.83939	7.94483
FBgn0015663	Ugt36A1	-1.16977	0.000249492	360Iso_Up	9.68791	6.93472	5.78496	13.0388	12.9931
FBgn0027070	Ugt36E1	-1.01482	0.00135636	360Iso_Up	19.38	10.6711	16.8417	24.4625	25.5448
FBgn0038083	Ugt37A3	-5.26581	0.000255295	360Iso_Up	0.689633	0	0.0933059	1.64454	1.02069
FBgn0026755	Ugt37B1	-3.46614	7.2921e-36	360Iso_Up	14.4108	2.54074	2.70587	27.0174	25.3793
FBgn0027073	Ugt49B1	-1.89291	1.04286e-13	360Iso_Up	52.5579	19.4591	28.9248	84.1651	77.6828
FBgn0050438	Ugt50B3	-1.44099	0.000210974	360Iso_Up	5.13706	2.57063	3.40566	7.84092	6.73104
FBgn0083124	Uhg4	1.35874	0.000927498	360Grp_Up	19.1052	17.5161	39.0485	7.63535	12.2207
FBgn0083123	Uhg5	1.15294	1.01866e-05	360Grp_Up	24.3907	33.478	35.8761	15.2707	12.9379
FBgn0086691	UK114	-2.20044	3.72082e-11	360Iso_Up	42.1912	10.0434	22.9066	68.8356	66.9793
FBgn0003965	v	-1.47054	5.33897e-05	360Iso_Up	44.4468	15.1548	35.8294	68.0721	58.7311
FBgn0030262	Vago	-1.56851	9.94823e-06	360Iso_Up	20.7938	7.11407	15.6287	30.3358	30.0966
FBgn0262524	ver	1.09049	0.0482872	360Grp_Up	3.38248	3.31791	6.20484	1.9382	2.06897
FBgn0263143	vret	2.01061	0.00517713	360Grp_Up	1.28628	1.73368	2.47261	0.469868	0.468966
FBgn0016076	vri	1.40851	2.21943e-10	360Grp_Up	59.9166	90.4204	88.2673	29.3374	31.6414
FBgn0003996	w	-1.16723	0.000271372	360Iso_Up	9.48493	6.24723	6.25149	11.4824	13.9586
FBgn0034718	wdp	-1.53991	6.28432e-12	360Iso_Up	52.2237	28.5459	28.9715	78.9084	72.469
FBgn0260780	wisp	1.30581	0.0109854	360Grp_Up	3.02025	3.58692	5.27178	1.73264	1.48966
FBgn0038608	WRNexo	-3.29843	0.0486689	360Iso_Up	0.330675	0.119564	0	0.734168	0.468966
FBgn0041711	yellow-e	-2.6596	5.26208e-23	360Iso_Up	16.8173	4.93202	5.08517	31.5692	25.6828
FBgn0038105	yellow-f2	-1.99391	1.46058e-12	360Iso_Up	32.5992	10.6113	17.8681	52.0966	49.8207
FBgn0040064	yip2	-1.16595	3.89288e-05	360Iso_Up	146.393	72.6651	121.064	202.131	189.71
FBgn0004045	Yp1	-9.33117	0.000511888	360Iso_Up	1231.93	4.30431	4.19876	4895.67	23.531
FBgn0005391	Yp2	-9.09139	0.000642861	360Iso_Up	809.469	3.64671	2.93913	3213.66	17.6276
FBgn0036461	Zip71B	-1.11868	0.00105506	360Iso_Up	7.96208	5.58962	5.13182	11.3062	9.82069
FBgn0025693	ZnT41F	-1.25312	8.56469e-05	360Iso_Up	12.3329	9.14666	6.39145	16.3866	17.4069
FBgn0037000	ZnT77C	-2.42419	1.33032e-08	360Iso_Up	5.369	2.51085	1.07302	9.36799	8.52414
FBgn0004057	Zw	-1.43013	2.86057e-09	360Iso_Up	44.3182	24.0025	27.6185	68.1896	57.4621

## Sheet: DGRP317_GrpVSIso
FlyBase ID	GeneSymbol	log2FC	padj	Remark	Avg.norm.exp	317Grp_1	317Grp_2	317Iso_1	317Iso_2
FBgn0031791	AANATL2	-1.3209	0.000273944	317Iso_Up	22.4052	17.259	9.93344	29.8634	32.5651
FBgn0010387	Acbp2	-1.33008	1.16328e-05	317Iso_Up	53.901	34.0305	31.0811	58.7058	91.7864
FBgn0033246	ACC	-1.09388	1.83007e-05	317Iso_Up	335.592	202.72	250.926	380.024	508.699
FBgn0034629	Acox57D-d	-1.73722	6.55549e-05	317Iso_Up	5.55439	2.48647	2.96011	6.5725	10.1985
FBgn0000044	Act57B	-1.86129	7.64447e-14	317Iso_Up	1122.72	609.039	423.21	1757.54	1701.09
FBgn0000045	Act79B	-2.17347	0.00856089	317Iso_Up	266.124	84.3937	123.158	247.617	609.327
FBgn0000046	Act87E	-1.81524	4.94862e-21	317Iso_Up	201.321	100.19	89.8564	295.89	319.349
FBgn0000047	Act88F	-2.2262	8.65523e-06	317Iso_Up	10.8319	4.19287	3.98476	9.76303	25.3868
FBgn0000667	Actn	-1.10638	2.34032e-08	317Iso_Up	317.398	218.176	207.834	395.243	448.34
FBgn0037661	Ada	-1.54291	0.0253901	317Iso_Up	1.67346	0.975086	0.853878	2.80767	2.05721
FBgn0286071	AdamTS-A	-1.18025	7.40089e-06	317Iso_Up	16.1561	10.4334	10.5312	23.1314	20.5283
FBgn0030421	Agpat1	-1.10661	6.42024e-07	317Iso_Up	60.6245	40.8074	40.5592	88.1225	73.009
FBgn0036622	Agpat4	-2.16361	1.87263e-08	317Iso_Up	5.95734	1.85266	2.76087	9.06111	10.1547
FBgn0014031	Agxt	-1.68935	6.26102e-07	317Iso_Up	57.4361	26.3761	31.6219	61.2263	110.52
FBgn0015011	AhcyL2	-1.10889	4.04517e-05	317Iso_Up	16.6563	11.4085	10.9296	20.7385	23.5485
FBgn0012036	Aldh	-1.60413	1.88392e-09	317Iso_Up	406.77	195.895	233.393	480.877	716.915
FBgn0032477	Alg7	-1.4467	4.52502e-11	317Iso_Up	35.887	18.7704	22.1439	50.9847	51.649
FBgn0035619	Alp10	6.6442	0.0034607	317Grp_Up	0.372976	0.438789	1.05312	0	0
FBgn0035620	Alp9	6.42769	0.00350199	317Grp_Up	0.906459	0.195017	3.38705	0	0.0437704
FBgn0015570	alpha-Est2	-1.82916	0.000144939	317Iso_Up	14.0432	3.75408	9.39265	17.4203	25.6057
FBgn0261393	alpha-Est5	-1.26776	0.0316535	317Iso_Up	3.80361	1.51138	3.18781	4.56246	5.95277
FBgn0015575	alpha-Est7	-1.17934	4.22995e-07	317Iso_Up	125.584	70.9375	92.1619	158.378	180.859
FBgn0015576	alpha-Est8	-1.15834	7.36624e-07	317Iso_Up	56.9899	32.4216	42.2669	76.8918	76.3793
FBgn0033366	Ance-4	-1.55483	0.000394154	317Iso_Up	27.6526	10.6284	19.2976	27.8533	52.8308
FBgn0035076	Ance-5	-1.08661	0.0355367	317Iso_Up	18.6233	7.21564	18.0453	20.3875	28.8447
FBgn0026268	Antdh	-1.24549	0.00167296	317Iso_Up	55.0927	25.8398	43.6047	55.4195	95.5069
FBgn0087002	apolpp	-1.02375	0.00225064	317Iso_Up	1194.2	589.098	1080.33	1478.3	1629.09
FBgn0033807	AQP	-1.45735	9.53166e-05	317Iso_Up	26.7558	19.5992	10.7589	34.7768	41.8882
FBgn0033926	Arc1	2.1326	2.19479e-14	317Grp_Up	334.953	423.724	684.383	128.802	102.904
FBgn0033928	Arc2	1.04545	0.0161627	317Grp_Up	7.52035	7.84945	12.9505	4.46674	4.81474
FBgn0023535	arg	-2.21909	1.70981e-07	317Iso_Up	6.03057	2.8765	1.73622	8.74206	10.7675
FBgn0032076	Argl	-2.12363	1.81774e-14	317Iso_Up	39.3878	14.5288	16.9352	51.2399	74.8473
FBgn0034075	Asph	-1.08496	0.000524354	317Iso_Up	107.87	82.9311	63.0731	171.587	113.89
FBgn0017424	asRNA:CR11538	-6.20761	0.0171394	317Iso_Up	0.233882	0	0	0.191432	0.744096
FBgn0266428	asRNA:CR43463	-2.08074	4.45977e-08	317Iso_Up	23.9156	13.0662	6.51793	41.0621	35.0163
FBgn0264572	asRNA:CR43944	1.36414	7.2534e-06	317Grp_Up	11.335	18.0391	15.3698	5.93439	5.99654
FBgn0264788	asRNA:CR44018	1.19703	0.00986181	317Grp_Up	4.9717	7.8982	6.31869	3.35006	2.31983
FBgn0264871	asRNA:CR44062	-1.88459	0.0382305	317Iso_Up	0.963565	0.390035	0.483864	1.75479	1.22557
FBgn0264878	asRNA:CR44069	1.42248	0.0397292	317Grp_Up	1.72866	2.2427	2.90318	0.893349	0.875407
FBgn0265065	asRNA:CR44176	3.29324	0.042093	317Grp_Up	0.496067	1.1701	0.654639	0.159527	0
FBgn0265811	asRNA:CR44600	-2.31886	0.0475951	317Iso_Up	0.761369	0.0975086	0.426939	0.989065	1.53196
FBgn0266117	asRNA:CR44843	1.05308	0.0182399	317Grp_Up	4.48044	6.58183	5.83483	2.61624	2.88884
FBgn0266331	asRNA:CR44996	1.93097	0.00665666	317Grp_Up	1.68419	2.14519	3.2732	0.574296	0.744096
FBgn0266406	asRNA:CR45046	-1.301	0.00294419	317Iso_Up	5.10874	2.58398	3.64321	6.28535	7.92243
FBgn0266705	asRNA:CR45195	1.37284	0.00814732	317Grp_Up	4.90647	7.65443	6.80256	1.75479	3.41409
FBgn0267161	asRNA:CR45601	-6.38847	5.54605e-30	317Iso_Up	8.0302	0.390035	0.0853878	15.5379	16.1075
FBgn0267693	asRNA:CR46029	1.76778	0.000131403	317Grp_Up	3.96922	6.8256	5.69252	1.91432	1.44442
FBgn0267776	asRNA:CR46107	2.01846	0.0355367	317Grp_Up	1.58271	1.56014	3.61475	0.893349	0.262622
FBgn0287463	asRNA:CR46452	-2.01557	0.0372372	317Iso_Up	0.823048	0.292526	0.398476	1.24431	1.35688
FBgn0026565	Ass	-1.67235	0.00467043	317Iso_Up	2.83304	1.36512	1.50852	3.03101	5.42752
FBgn0032336	AstC	1.65781	3.60443e-13	317Grp_Up	134.852	188.289	229.494	68.1817	53.4436
FBgn0036995	atk	2.47942	1.10003e-05	317Grp_Up	4.39164	4.68041	10.3888	1.05288	1.44442
FBgn0010217	ATPsynbeta	-1.32025	1.46956e-12	317Iso_Up	1501.46	955.048	866.003	2050.65	2134.16
FBgn0039830	ATPsynC	-1.15641	2.55571e-06	317Iso_Up	2351.26	1774.46	1304.47	3130.04	3196.07
FBgn0028342	ATPsyndelta	-1.14373	7.87538e-07	317Iso_Up	290.204	207.547	175.13	352.777	425.36
FBgn0020235	ATPsyngamma	-1.20955	1.64388e-06	317Iso_Up	599.793	397.299	370.099	680.381	951.392
FBgn0016691	ATPsynO	-1.07766	2.72353e-05	317Iso_Up	485.541	362.05	297.975	555.376	726.763
FBgn0041579	AttC	-2.5487	0.018988	317Iso_Up	78.4118	14.7238	34.7528	73.9884	190.182
FBgn0000147	aurA	1.98219	0.000790162	317Grp_Up	2.13284	3.51031	3.41551	0.861444	0.744096
FBgn0000153	b	-1.04372	7.76289e-05	317Iso_Up	27.1829	20.7206	16.8499	34.3939	36.7671
FBgn0024897	b6	-1.42191	0.0201451	317Iso_Up	6.15398	4.68041	2.44778	12.0602	5.42752
FBgn0028482	bdl	-1.51334	9.51426e-08	317Iso_Up	368.058	245.624	159.704	498.457	568.446
FBgn0003890	betaTub97EF	-1.1674	8.12235e-06	317Iso_Up	120.877	85.9539	71.7257	139.937	185.893
FBgn0027348	bgm	-1.39841	0.000139889	317Iso_Up	37.3984	24.0846	19.6107	37.6164	68.2818
FBgn0011211	blw	-1.33357	2.35052e-10	317Iso_Up	2481.07	1572.96	1417.47	3150.75	3783.12
FBgn0034328	BomBc1	-2.54923	0.00864207	317Iso_Up	37.5219	10.3847	13.2066	29.8953	96.6012
FBgn0034331	BomBc2	-1.03185	0.00985052	317Iso_Up	93.6658	56.2625	74.0596	81.9967	162.344
FBgn0034329	BomS1	-1.43015	8.49071e-06	317Iso_Up	100.91	58.6027	57.5229	104.905	182.61
FBgn0025583	BomS2	-1.32774	0.000244832	317Iso_Up	138.702	66.0133	102.124	142.17	244.501
FBgn0260942	bond	-1.59797	3.09506e-06	317Iso_Up	34.9283	21.3056	15.5975	63.8106	38.9994
FBgn0000206	boss	-1.51834	2.55754e-09	317Iso_Up	266.365	172.151	120.539	384.044	388.725
FBgn0010300	brat	1.12463	0.00173793	317Grp_Up	128.969	180.147	182.587	101.012	52.1305
FBgn0264001	bru3	1.17214	0.000234411	317Grp_Up	763.633	1075.33	1093.13	565.586	320.487
FBgn0000241	bw	-1.1499	1.72587e-06	317Iso_Up	28.7202	19.4042	18.3868	35.9892	41.1004
FBgn0263111	cac	1.1341	0.000528482	317Grp_Up	563.178	819.56	767.095	426.766	239.293
FBgn0027843	CAH2	-1.0925	1.75189e-08	317Iso_Up	126.986	88.8304	82.6838	169.226	167.203
FBgn0040629	CAH5	2.97279	0.0478812	317Grp_Up	0.57185	0.585052	1.45159	0.0319053	0.218852
FBgn0000261	Cat	-1.2264	4.39411e-10	317Iso_Up	211.574	124.47	144.135	304.345	273.346
FBgn0038199	CCHa1	1.1502	0.00603732	317Grp_Up	10.0817	17.6491	10.8727	6.50869	5.29621
FBgn0038147	CCHa2	-1.1894	1.76976e-07	317Iso_Up	34.629	20.4281	24.2786	48.1132	45.6963
FBgn0004783	Ccp84Aa	-3.37693	0.00889893	317Iso_Up	1.12137	0.390035	0.0569252	3.38196	0.656555
FBgn0004780	Ccp84Ad	-3.41525	0.0423031	317Iso_Up	0.402354	0.0975086	0.0569252	1.14859	0.306392
FBgn0004777	Ccp84Ag	-2.01689	0.00428386	317Iso_Up	2.38306	1.36512	0.683102	4.94532	2.53868
FBgn0263986	cd	-1.45256	0.00109512	317Iso_Up	5.35642	3.26654	2.84626	9.31635	5.99654
FBgn0052499	Cda4	-2.73156	5.60131e-07	317Iso_Up	7.16237	2.73024	1.33774	16.8779	7.70358
FBgn0035918	Cdc6	-4.51357	3.35988e-17	317Iso_Up	4.07551	0.487543	0.284626	6.73202	8.79784
FBgn0016131	Cdk4	-1.24424	0.00027632	317Iso_Up	12.5526	6.33806	9.42112	15.7612	18.6899
FBgn0000276	CecA1	-1.97798	0.0127546	317Iso_Up	4.29943	1.75516	1.96392	2.36099	11.1177
FBgn0000277	CecA2	-2.112	0.00753045	317Iso_Up	3.97149	1.07259	2.10623	2.55243	10.1547
FBgn0000278	CecB	-2.66184	0.018988	317Iso_Up	0.677209	0.0975086	0.284626	1.27621	1.05049
FBgn0000279	CecC	-1.93239	0.00241557	317Iso_Up	2.41034	0.68256	1.42313	3.15863	4.37704
FBgn0266916	Cenp-C	1.05913	0.0108232	317Grp_Up	4.91192	6.48432	7.14411	2.9991	3.02015
FBgn0039207	Cftr	-1.21161	1.3142e-08	317Iso_Up	43.8557	27.9362	28.121	63.0768	56.2887
FBgn0039094	CG10184	-1.04794	4.81043e-05	317Iso_Up	26.2131	17.1128	19.013	31.1715	37.555
FBgn0039118	CG10208	-1.16213	8.18738e-05	317Iso_Up	14.1925	8.4345	10.1042	17.4841	20.7471
FBgn0032783	CG10237	-1.16043	5.63609e-06	317Iso_Up	81.2227	53.386	52.9689	92.3021	126.234
FBgn0034972	CG10339	-1.13629	0.0198179	317Iso_Up	5.49061	3.55907	3.70014	5.4239	9.27932
FBgn0032707	CG10348	-1.05132	0.0309316	317Iso_Up	7.09312	5.46048	4.32631	11.9326	6.65309
FBgn0030348	CG10352	-1.41269	6.22421e-07	317Iso_Up	11.2122	6.43557	6.57486	16.4312	15.4072
FBgn0038395	CG10407	-1.54603	0.00208811	317Iso_Up	7.13069	5.07045	2.70395	12.8259	7.92243
FBgn0035670	CG10472	1.38329	0.00194313	317Grp_Up	4.67649	7.70318	6.11946	2.16956	2.71376
FBgn0034612	CG10505	1.76166	0.0124266	317Grp_Up	1.60982	2.34021	2.73241	0.797633	0.569015
FBgn0036549	CG10516	-1.05055	5.50745e-05	317Iso_Up	19.3168	12.0911	14.4875	25.6519	25.0366
FBgn0039324	CG10553	-1.47038	2.25304e-07	317Iso_Up	18.2871	11.7498	8.90879	26.9281	25.5619
FBgn0032726	CG10621	-2.36423	2.28214e-31	317Iso_Up	43.1962	14.285	15.8252	69.8407	72.8339
FBgn0032836	CG10680	-1.02815	0.0115951	317Iso_Up	135.824	64.9408	124.609	138.788	214.956
FBgn0038804	CG10877	-1.77701	0.0056674	317Iso_Up	2.08813	1.1701	0.853878	2.52052	3.80802
FBgn0037228	CG1092	-1.56219	0.00198336	317Iso_Up	7.97112	3.12028	5.43635	8.00824	15.3196
FBgn0034253	CG10936	-2.01319	1.57093e-05	317Iso_Up	14.4343	7.65443	4.61094	30.8524	14.6193
FBgn0032857	CG10947	-1.01315	7.40089e-06	317Iso_Up	39.0472	28.0825	26.6125	48.4004	53.0934
FBgn0039241	CG11089	-1.27963	2.22789e-10	317Iso_Up	119.693	78.0069	70.0749	159.941	170.748
FBgn0034528	CG11180	1.06148	0.00118159	317Grp_Up	25.2546	41.7825	28.3203	16.5589	14.3567
FBgn0035490	CG1136	-1.48954	1.92217e-05	317Iso_Up	23.6984	14.6263	11.8404	42.7212	25.6057
FBgn0037454	CG1137	2.13618	9.77637e-06	317Grp_Up	4.54152	8.53201	6.51793	1.97813	1.13803
FBgn0040359	CG11380	-3.71349	4.6618e-05	317Iso_Up	2.48098	0.68256	0.11385	6.76393	2.3636
FBgn0034198	CG11400	-1.34212	3.91602e-05	317Iso_Up	24.7376	11.701	17.9884	30.0867	39.1745
FBgn0024366	CG11409	-1.24594	0.00670805	317Iso_Up	4.85015	3.51031	2.61856	7.62537	5.64638
FBgn0037166	CG11426	-2.86021	6.6891e-28	317Iso_Up	202.143	62.4055	42.8077	316.692	386.667
FBgn0037164	CG11438	-1.40333	3.45468e-06	317Iso_Up	13.8778	6.97187	9.16495	18.0584	21.3162
FBgn0037162	CG11449	-3.01798	0.00623262	317Iso_Up	0.769364	0.195017	0.170776	0.829538	1.88213
FBgn0037396	CG11459	-2.03142	0.00058372	317Iso_Up	4.25418	1.12135	2.41932	4.72199	8.75407
FBgn0035484	CG11594	-1.50764	1.81452e-08	317Iso_Up	94.6082	56.945	47.7318	114.125	159.63
FBgn0033519	CG11825	-1.74137	0.00507982	317Iso_Up	1.86555	0.828823	0.99619	2.96719	2.66999
FBgn0039272	CG11836	1.07188	0.0213503	317Grp_Up	4.50804	7.11813	5.43635	2.80767	2.66999
FBgn0039271	CG11839	1.0468	0.0120811	317Grp_Up	5.69997	8.33699	7.42873	3.09482	3.93933
FBgn0039297	CG11852	-1.16199	0.0262887	317Iso_Up	13.5272	9.0683	8.62416	26.1305	10.286
FBgn0037386	CG1208	-1.50585	7.14552e-07	317Iso_Up	11.7859	6.87436	6.20484	18.9199	15.1445
FBgn0037387	CG1213	-1.29481	1.88741e-10	317Iso_Up	147.917	96.8261	84.8185	199.663	210.36
FBgn0029662	CG12206	-1.75327	0.0480455	317Iso_Up	1.87919	1.46263	0.398476	2.32909	3.32655
FBgn0029810	CG12239	1.58519	4.52667e-10	317Grp_Up	1053.73	1620.5	1606.14	399.901	588.361
FBgn0038002	CG12256	3.0773	3.85835e-19	317Grp_Up	20.1692	28.8626	43.8608	3.09482	4.85851
FBgn0039131	CG12268	-1.42015	0.000450508	317Iso_Up	7.01193	4.19287	3.92784	12.0921	7.83489
FBgn0037811	CG12592	2.31228	0.0053712	317Grp_Up	1.1911	2.34021	1.67929	0.350959	0.393933
FBgn0030721	CG12698	4.08999	0.0011744	317Grp_Up	0.751043	1.56014	1.28082	0.0319053	0.131311
FBgn0033502	CG12910	-1.07481	1.35723e-05	317Iso_Up	29.7471	20.4768	20.0377	35.7978	42.6761
FBgn0037753	CG12947	-1.28504	0.000269081	317Iso_Up	6.92347	4.58291	3.98476	9.89065	9.23555
FBgn0030798	CG13003	-1.64033	7.36553e-07	317Iso_Up	10.7039	5.26547	5.80637	18.5689	13.1749
FBgn0036665	CG13024	-1.48897	0.0032181	317Iso_Up	11.0151	8.33699	3.98476	19.877	11.8618
FBgn0036584	CG13054	1.21011	0.0301426	317Grp_Up	4.01419	3.99785	7.48566	2.29718	2.27606
FBgn0036583	CG13055	1.6748	7.40089e-06	317Grp_Up	9.9647	12.8711	18.1022	5.29628	3.58917
FBgn0036607	CG13059	-2.36003	0.0464423	317Iso_Up	1.68218	0.877578	0.313088	4.88151	0.656555
FBgn0036585	CG13071	-1.58371	0.0182943	317Iso_Up	8.77729	7.21564	2.13469	16.6546	9.10423
FBgn0032803	CG13082	-1.98082	5.39905e-05	317Iso_Up	14.3326	6.63059	5.74944	32.6072	12.3432
FBgn0032770	CG13086	-1.18649	0.0211081	317Iso_Up	4.67917	2.43772	3.58629	4.94532	7.74735
FBgn0032260	CG13144	-2.23723	0.00511671	317Iso_Up	1.19349	0.536297	0.370014	1.72289	2.14475
FBgn0086673	CG13272	-1.43983	8.8018e-05	317Iso_Up	5.87223	3.12028	3.58629	8.07205	8.7103
FBgn0035921	CG13305	-1.75662	3.33398e-14	317Iso_Up	31.3327	16.4302	14.1174	45.8479	48.9353
FBgn0033863	CG13337	1.78598	8.99824e-06	317Grp_Up	10.1138	19.4042	12.552	5.04104	3.45786
FBgn0025620	CG13360	-2.66087	5.54605e-30	317Iso_Up	43.9248	14.3338	11.4989	70.5108	79.3557
FBgn0014417	CG13397	-1.04644	0.000132938	317Iso_Up	15.4274	9.99464	11.2712	19.3027	21.1411
FBgn0034692	CG13502	1.60388	0.00116643	317Grp_Up	4.77736	9.21457	5.46482	2.32909	2.10098
FBgn0034828	CG13545	-2.50512	0.0363715	317Iso_Up	2.34661	1.26761	0.256163	6.98727	0.875407
FBgn0034966	CG13563	-1.38483	0.0357107	317Iso_Up	5.42474	4.58291	1.82161	9.95446	5.33998
FBgn0039161	CG13606	-1.44326	0.000803717	317Iso_Up	21.913	15.2601	9.76267	41.0941	21.535
FBgn0039239	CG13641	-2.3559	2.35176e-06	317Iso_Up	2.79216	0.926332	1.02465	4.40293	4.81474
FBgn0040601	CG13643	-2.39264	0.0115344	317Iso_Up	1.57185	0.633806	0.455401	4.14769	1.05049
FBgn0035844	CG13676	-2.92493	0.0117191	317Iso_Up	11.6157	4.4854	1.30928	27.0557	13.6126
FBgn0035553	CG13722	-3.45076	0.00874422	317Iso_Up	12.1149	2.82775	1.53698	36.0849	8.00998
FBgn0031937	CG13795	-1.19841	0.000113032	317Iso_Up	14.2702	7.55692	10.7589	19.4622	19.3027
FBgn0038959	CG13856	-1.80658	2.11265e-10	317Iso_Up	13.1114	6.48432	5.97714	21.9509	18.0334
FBgn0034506	CG13870	1.43505	0.0242208	317Grp_Up	2.10491	2.73024	3.55782	1.2124	0.919177
FBgn0035186	CG13912	-1.33149	0.00994505	317Iso_Up	7.27565	2.97401	5.7779	7.65728	12.6934
FBgn0036364	CG14109	-1.01553	0.000405984	317Iso_Up	61.6753	48.6568	37.5991	69.8407	90.6046
FBgn0040817	CG14132	-1.44547	0.00185727	317Iso_Up	31.2944	25.4498	10.1896	47.4751	42.0633
FBgn0036094	CG14153	-1.51968	2.45479e-05	317Iso_Up	18.7246	12.3348	8.28261	32.352	21.9289
FBgn0031031	CG14218	-4.49257	0.000781166	317Iso_Up	0.800972	0.0975086	0.0569252	2.3929	0.656555
FBgn0040608	CG14246	-1.80142	0.000515893	317Iso_Up	4.3446	2.779	1.39467	6.15773	7.04703
FBgn0039483	CG14259	-1.54502	6.22788e-11	317Iso_Up	22.6473	12.7736	11.8404	32.0968	33.8783
FBgn0038654	CG14298	-1.23536	1.70981e-07	317Iso_Up	25.0062	15.9914	15.626	36.1487	32.2588
FBgn0038632	CG14301	-1.45979	0.0143921	317Iso_Up	6.995	5.70426	2.24854	12.4112	7.61604
FBgn0038207	CG14356	1.10406	0.0417522	317Grp_Up	3.19177	4.63166	4.32631	2.23337	1.57573
FBgn0038148	CG14377	-2.08134	0.000176471	317Iso_Up	2.52609	1.26761	0.825415	4.11579	3.89556
FBgn0037171	CG14459	1.5231	0.0236762	317Grp_Up	1.98714	2.8765	3.15935	1.2124	0.700326
FBgn0034293	CG14495	-4.41865	1.04981e-09	317Iso_Up	3.41388	0.633806	0.0853878	7.11489	5.82146
FBgn0037129	CG14565	-3.96461	0.000350513	317Iso_Up	1.02073	0.195017	0.0853878	2.83957	0.962948
FBgn0037128	CG14572	-3.97551	0.013521	317Iso_Up	0.532879	0.0487543	0.0853878	1.69098	0.306392
FBgn0037503	CG14598	-2.16356	0.0419161	317Iso_Up	0.696962	0.292526	0.256163	1.27621	0.962948
FBgn0037488	CG14607	-4.41119	0.00714798	317Iso_Up	0.507107	0	0.0853878	0.54239	1.40065
FBgn0040398	CG14629	-1.39538	0.000517706	317Iso_Up	139.528	60.5041	103.262	137.193	257.151
FBgn0037222	CG14642	-2.2533	0.00722374	317Iso_Up	1.04064	0.34128	0.426939	1.8186	1.57573
FBgn0030157	CG1468	-1.17952	0.000413603	317Iso_Up	47.3811	24.5722	36.9729	52.0376	75.9416
FBgn0037845	CG14694	-1.63884	4.26133e-05	317Iso_Up	5.10695	2.73024	2.56163	6.73202	8.40391
FBgn0037850	CG14695	1.30882	0.00956935	317Grp_Up	4.2094	4.68041	7.59951	2.45671	2.10098
FBgn0029573	CG14770	-2.20948	0.00783998	317Iso_Up	2.38144	1.26761	0.569252	5.80677	1.88213
FBgn0032377	CG14937	1.09112	0.00799822	317Grp_Up	5.13866	6.58183	7.77029	3.09482	3.1077
FBgn0035544	CG15021	-1.44493	0.00206337	317Iso_Up	60.9564	43.9764	25.3886	121.017	53.4436
FBgn0034397	CG15082	1.02611	0.000923759	317Grp_Up	12.0679	16.5277	16.7075	6.76393	8.2726
FBgn0034390	CG15093	-1.76061	1.58074e-09	317Iso_Up	49.2751	20.1355	27.7795	61.5135	87.672
FBgn0034394	CG15096	-1.44324	2.8732e-07	317Iso_Up	84.4403	41.2949	55.3028	100.31	140.853
FBgn0032647	CG15143	1.56029	0.0355169	317Grp_Up	1.75276	2.34021	3.01703	1.08478	0.569015
FBgn0030270	CG15199	-1.952	0.000973597	317Iso_Up	2.48811	0.975086	1.19543	2.96719	4.81474
FBgn0030234	CG15211	-1.36666	6.73291e-06	317Iso_Up	23.2462	15.1626	12.4381	38.1588	27.2252
FBgn0028526	CG15293	-1.60606	3.45392e-06	317Iso_Up	102.666	37.8821	70.5018	128.993	173.287
FBgn0040718	CG15353	-1.29361	0.00805984	317Iso_Up	6.73768	2.92526	5.3225	7.49775	11.2052
FBgn0031542	CG15414	-2.78916	6.74663e-16	317Iso_Up	7.442	1.7064	2.30547	13.7193	12.0368
FBgn0031554	CG15418	-1.8299	0.0342902	317Iso_Up	1.71593	1.26761	0.370014	2.4248	2.8013
FBgn0039827	CG1544	-1.18722	0.000685717	317Iso_Up	15.0752	7.70318	11.755	17.9946	22.8481
FBgn0032867	CG15475	1.45708	0.0252311	317Grp_Up	2.02491	3.51031	2.56163	1.02097	1.00672
FBgn0039686	CG15506	-1.38073	0.010308	317Iso_Up	3.88879	2.58398	2.02084	6.92345	4.02687
FBgn0039719	CG15515	-1.72435	0.00846345	317Iso_Up	3.84326	2.8765	0.967728	5.83867	5.69015
FBgn0039782	CG15539	1.66294	0.00595071	317Grp_Up	2.19206	2.92526	3.87091	1.05288	0.919177
FBgn0039829	CG15561	1.06555	0.0299509	317Grp_Up	7.16639	11.7985	8.1403	5.48772	3.23901
FBgn0031630	CG15629	-1.42825	0.000191927	317Iso_Up	8.33916	4.53415	5.06634	14.3893	9.36686
FBgn0030347	CG15739	-1.29697	1.58496e-07	317Iso_Up	29.6145	19.8918	16.4798	42.5617	39.5246
FBgn0035308	CG15822	-1.1601	0.000377667	317Iso_Up	11.0447	7.02062	7.42873	12.9217	16.8078
FBgn0030218	CG1628	-1.12055	0.00393256	317Iso_Up	18.207	9.55585	14.7152	19.1432	29.4137
FBgn0030027	CG1632	-1.65693	5.52012e-06	317Iso_Up	56.5638	38.2234	19.6961	78.519	89.8168
FBgn0031558	CG16704	-2.07804	1.92391e-06	317Iso_Up	9.01234	3.12028	4.24093	9.95446	18.7337
FBgn0034505	CG16739	1.88375	0.000205164	317Grp_Up	3.97749	7.06938	5.69252	2.01004	1.13803
FBgn0032322	CG16743	-1.01817	0.000204142	317Iso_Up	20.3905	12.8711	15.5975	24.599	28.4945
FBgn0037678	CG16749	1.05769	0.0294218	317Grp_Up	4.64517	7.60567	5.29404	2.96719	2.71376
FBgn0029765	CG16756	-1.5754	4.93712e-05	317Iso_Up	14.5746	5.99678	9.56343	16.7822	25.9558
FBgn0032835	CG16772	-1.71086	1.91033e-11	317Iso_Up	132.646	61.5279	70.9003	164.249	233.909
FBgn0034974	CG16786	-1.63923	0.000585795	317Iso_Up	19.0189	12.0423	7.62797	39.1159	17.2893
FBgn0032495	CG16820	-1.92675	7.95953e-07	317Iso_Up	11.2765	5.55799	4.49709	22.2699	12.7809
FBgn0034480	CG16898	-1.4662	0.00780231	317Iso_Up	3.48914	1.31637	2.5901	4.75389	5.29621
FBgn0036481	CG16959	-1.32395	4.65706e-06	317Iso_Up	23.1508	15.7476	12.3243	35.8616	28.6696
FBgn0032387	CG16965	-1.4497	0.000533983	317Iso_Up	4.66299	2.38896	2.90318	6.09392	7.26588
FBgn0033443	CG1698	-1.33547	0.0104259	317Iso_Up	6.97848	3.99785	4.4117	13.464	6.04031
FBgn0032109	CG17005	-2.50532	1.34504e-07	317Iso_Up	3.39511	0.877578	1.28082	6.12582	5.29621
FBgn0036547	CG17032	-1.01294	0.0005814	317Iso_Up	32.0878	19.6967	25.2463	35.8297	47.5784
FBgn0265264	CG17097	-6.32906	0.00863272	317Iso_Up	0.253	0	0	0.574296	0.437704
FBgn0040496	CG17104	-2.22672	0.00280108	317Iso_Up	1.97805	0.975086	0.540789	4.33912	2.05721
FBgn0039485	CG17189	-1.26492	2.78436e-06	317Iso_Up	15.449	9.89713	9.36419	20.0365	22.498
FBgn0032414	CG17211	-1.69266	2.79301e-07	317Iso_Up	63.3289	40.7586	22.9124	94.6631	94.9817
FBgn0031168	CG1722	1.31033	0.000865084	317Grp_Up	9.73099	17.259	11.1289	4.97723	5.55884
FBgn0031490	CG17264	1.65287	0.000360072	317Grp_Up	4.81565	5.94803	8.93725	1.88241	2.49491
FBgn0032751	CG17343	1.12975	0.0300277	317Grp_Up	3.89901	6.1918	4.81018	2.71195	1.88213
FBgn0038001	CG17404	-3.5457	3.90626e-05	317Iso_Up	1.12533	0.146263	0.227701	2.20147	1.9259
FBgn0040028	CG17450	1.75213	0.0414888	317Grp_Up	1.36153	2.2427	2.02084	0.350959	0.831637
FBgn0033439	CG1773	-1.692	0.000973597	317Iso_Up	3.87913	1.36512	2.50471	5.16866	6.47801
FBgn0038009	CG17738	6.5296	0.00463733	317Grp_Up	0.344514	0.438789	0.939265	0	0
FBgn0033710	CG17739	-1.28968	6.24761e-07	317Iso_Up	534.948	350.056	308.62	614.943	866.172
FBgn0039856	CG1774	-1.86302	2.43676e-09	317Iso_Up	28.0261	12.6274	13.1782	33.1177	53.181
FBgn0032603	CG17928	-1.05994	0.00144915	317Iso_Up	26.9627	14.285	22.6847	31.9691	38.9118
FBgn0034624	CG17974	-1.62068	0.00689894	317Iso_Up	2.92583	1.95017	1.1385	5.20057	3.41409
FBgn0035262	CG18171	1.43054	3.14587e-07	317Grp_Up	15.1275	23.8409	21.2616	7.1787	8.22883
FBgn0038470	CG18213	1.25543	0.0232467	317Grp_Up	3.42678	4.53415	5.37943	2.3929	1.40065
FBgn0037553	CG18249	-1.494	0.000999916	317Iso_Up	6.99114	2.82775	4.92403	8.26348	11.9493
FBgn0032266	CG18302	-1.08795	0.0338312	317Iso_Up	7.71697	3.21778	7.20103	10.6883	9.76079
FBgn0033904	CG18327	-1.42556	0.0185992	317Iso_Up	2.88461	1.07259	2.22008	3.95626	4.28949
FBgn0033864	CG18368	1.73116	0.00186319	317Grp_Up	3.60141	7.16688	4.12707	1.75479	1.35688
FBgn0033204	CG2065	-1.01593	0.000408139	317Iso_Up	17.7657	11.7985	13.0359	20.5789	25.6494
FBgn0033289	CG2121	-1.62908	4.26037e-11	317Iso_Up	17.3364	9.01955	9.02264	24.8223	26.4811
FBgn0030251	CG2145	-1.13374	0.00219481	317Iso_Up	82.7903	45.1953	64.7524	79.9228	141.291
FBgn0029990	CG2233	-1.78306	7.95953e-07	317Iso_Up	474.824	170.153	287.557	526.565	915.019
FBgn0030326	CG2444	-2.61177	0.00631769	317Iso_Up	1.60324	0.487543	0.483864	4.43484	1.00672
FBgn0032864	CG2493	-1.25563	0.00012147	317Iso_Up	35.2114	18.8192	25.2748	38.3183	58.4334
FBgn0037537	CG2767	-1.22233	2.91716e-10	317Iso_Up	126.731	77.7631	83.4238	164.44	181.297
FBgn0031273	CG2839	6.35284	0.00660634	317Grp_Up	0.305837	0.68256	0.540789	0	0
FBgn0023526	CG2865	1.0372	2.45479e-05	317Grp_Up	179.631	263.956	232.027	126.377	96.1635
FBgn0260474	CG30002	-1.50167	3.95746e-05	317Iso_Up	11.7861	5.50924	7.54259	13.7831	20.3094
FBgn0050050	CG30050	-1.28698	0.00455241	317Iso_Up	4.15351	2.92526	2.22008	5.64724	5.82146
FBgn0050054	CG30054	-1.0563	0.0191028	317Iso_Up	19.2149	17.5028	8.88033	21.6318	28.8447
FBgn0050148	CG30148	-1.20577	0.0236762	317Iso_Up	4.63093	2.14519	3.75706	5.13676	7.48473
FBgn0050281	CG30281	-3.0694	0.0102943	317Iso_Up	0.681039	0.243772	0.0853878	1.56336	0.831637
FBgn0050345	CG30345	-1.00737	0.010829	317Iso_Up	8.4662	6.97187	4.95249	12.0921	9.84833
FBgn0050384	CG30384	2.24155	1.11601e-06	317Grp_Up	5.5557	8.58076	9.99037	1.24431	2.40737
FBgn0051028	CG31028	-1.57315	0.00689402	317Iso_Up	2.56359	1.1701	1.56544	4.49865	3.02015
FBgn0051103	CG31103	-1.216	5.19357e-05	317Iso_Up	24.0056	15.9427	14.6867	38.6054	26.7875
FBgn0051161	CG31161	1.60206	4.05569e-05	317Grp_Up	5.43287	8.97079	7.71336	2.55243	2.49491
FBgn0051176	CG31176	-1.00993	0.00571468	317Iso_Up	9.04447	7.31315	5.40789	12.2516	11.2052
FBgn0051205	CG31205	-1.03077	4.28796e-06	317Iso_Up	95.8659	64.1607	69.0787	112.785	137.439
FBgn0051221	CG31221	1.09189	0.0016516	317Grp_Up	1315.06	1774.85	1898.71	1038.81	547.874
FBgn0051321	CG31321	-1.00474	0.000781166	317Iso_Up	16.37	12.8224	10.2181	20.2918	22.1478
FBgn0051371	CG31371	6.01392	0.0240532	317Grp_Up	0.240877	0.195017	0.76849	0	0
FBgn0051431	CG31431	-1.00093	0.0378369	317Iso_Up	4.70203	3.9491	2.70395	6.50869	5.64638
FBgn0051459	CG31459	6.49216	0.00430812	317Grp_Up	0.336343	0.633806	0.711565	0	0
FBgn0051548	CG31548	-1.2186	0.000121821	317Iso_Up	39.551	25.5473	24.8478	41.5407	66.2683
FBgn0051636	CG31636	-2.07164	2.00851e-11	317Iso_Up	12.292	5.70426	4.44016	17.7075	21.3162
FBgn0051815	CG31815	2.08527	0.018011	317Grp_Up	1.43049	3.31529	1.39467	0.574296	0.437704
FBgn0051832	CG31832	3.95365	0.00954889	317Grp_Up	0.488222	0.877578	0.967728	0.0638106	0.0437704
FBgn0051869	CG31869	-1.17473	0.000139889	317Iso_Up	47.2478	37.3458	24.0509	64.9592	62.6354
FBgn0051954	CG31954	-2.76153	0.0364873	317Iso_Up	0.887802	0.487543	0.0284626	1.37193	1.66327
FBgn0052191	CG32191	-1.41481	9.53166e-05	317Iso_Up	12.2954	5.55799	8.65263	15.1869	19.7842
FBgn0052271	CG32271	1.03212	0.000686923	317Grp_Up	14.4549	21.1106	18.7568	8.10395	9.84833
FBgn0052373	CG32373	1.22227	0.0475951	317Grp_Up	2.19752	3.26654	3.0455	1.34002	1.13803
FBgn0043783	CG32444	-2.41751	7.94424e-17	317Iso_Up	141.528	45.5365	50.3219	175.766	294.487
FBgn0031538	CG3246	-1.10505	0.0118147	317Iso_Up	43.4781	22.427	36.0906	38.7969	76.5981
FBgn0052512	CG32512	-1.48413	5.13041e-08	317Iso_Up	14.5272	7.3619	8.88033	21.9509	19.9155
FBgn0052687	CG32687	-1.02385	2.87522e-05	317Iso_Up	59.9236	41.2949	42.2385	68.5326	87.6283
FBgn0052695	CG32695	-1.13073	0.0168275	317Iso_Up	7.6642	3.36405	6.7741	9.79493	10.7237
FBgn0267253	CG32700	1.11157	9.24154e-05	317Grp_Up	260.672	390.961	340.043	187.859	123.826
FBgn0052726	CG32726	1.1163	0.000517706	317Grp_Up	20.6584	24.9622	33.0451	10.4011	14.2254
FBgn0052767	CG32767	1.15205	0.000319546	317Grp_Up	230.707	344.449	307.908	170.981	99.49
FBgn0052816	CG32816	-1.48498	0.00413278	317Iso_Up	6.35306	4.29038	2.84626	12.0602	6.21539
FBgn0052855	CG32855	-1.39086	0.00454484	317Iso_Up	4.70856	3.51031	2.04931	7.14679	6.12785
FBgn0038878	CG3301	-1.08489	5.38036e-06	317Iso_Up	125.443	76.3493	93.8411	148.711	182.873
FBgn0053159	CG33159	-2.31507	0.0263529	317Iso_Up	0.720567	0.195017	0.313088	1.14859	1.22557
FBgn0053178	CG33178	-1.06	0.000848214	317Iso_Up	19.4077	10.5309	16.0529	25.7476	25.2993
FBgn0053267	CG33267	1.47111	0.000902069	317Grp_Up	3.94103	5.60675	6.23331	2.04194	1.88213
FBgn0053301	CG33301	-3.39525	0.000205146	317Iso_Up	1.28958	0.292526	0.199238	1.34002	3.32655
FBgn0053493	CG33493	-1.11472	8.26013e-05	317Iso_Up	20.5322	12.4324	14.9998	24.4076	30.2891
FBgn0037975	CG3397	-1.32287	0.00287915	317Iso_Up	15.3903	7.60567	11.0435	14.5488	28.3632
FBgn0083974	CG34138	-2.26522	1.83814e-07	317Iso_Up	5.81678	2.53522	1.79314	11.454	7.48473
FBgn0085195	CG34166	-1.54303	0.000279842	317Iso_Up	83.4585	28.4725	62.5892	93.8655	148.907
FBgn0085209	CG34180	-1.22803	0.00145035	317Iso_Up	9.37318	7.16688	4.75325	11.7412	13.8314
FBgn0085320	CG34291	-2.77442	0.000440231	317Iso_Up	1.79875	0.34128	0.626177	1.85051	4.37704
FBgn0085360	CG34331	-1.38045	0.000596999	317Iso_Up	19.8922	8.72702	14.7152	21.5042	34.6224
FBgn0085452	CG34423	1.00212	0.0068162	317Grp_Up	13.0608	18.5266	17.2483	6.44487	10.0234
FBgn0085483	CG34454	-1.66809	0.000865084	317Iso_Up	6.67836	2.04768	4.72479	11.2307	8.7103
FBgn0031423	CG3557	4.86083	0.0398305	317Grp_Up	0.312695	0.780069	0.426939	0	0.0437704
FBgn0031417	CG3597	-1.82279	4.98197e-07	317Iso_Up	41.4197	13.8462	25.1609	51.0804	75.5914
FBgn0031562	CG3604	1.65053	4.40998e-06	317Grp_Up	6.08092	9.36083	9.44958	2.71195	2.8013
FBgn0031418	CG3609	-1.16949	5.70125e-06	317Iso_Up	79.9962	49.4856	54.8474	90.994	124.658
FBgn0040349	CG3699	-2.6012	1.11488e-14	317Iso_Up	62.7425	21.0619	17.106	74.8818	137.92
FBgn0040342	CG3706	1.64791	0.0316736	317Grp_Up	1.81891	1.90142	3.7286	0.989065	0.656555
FBgn0024989	CG3777	-2.67638	0.0211533	317Iso_Up	10.9536	4.43664	1.90699	27.8852	9.58571
FBgn0038275	CG3817	1.01611	0.00176742	317Grp_Up	9.13816	12.5299	12.6089	6.03011	5.38375
FBgn0029863	CG3823	-1.7169	4.59446e-13	317Iso_Up	30.2737	15.6014	14.5159	41.6045	49.373
FBgn0035091	CG3829	-1.093	0.000115332	317Iso_Up	39.9381	21.8419	32.1058	55.9938	49.8107
FBgn0038291	CG3984	-2.18203	3.04407e-09	317Iso_Up	8.20404	3.70533	2.67548	11.4221	15.0132
FBgn0037801	CG3999	-2.17143	2.6001e-11	317Iso_Up	10.1488	3.26654	4.58248	14.9317	17.8145
FBgn0038820	CG4000	-2.60579	0.00186097	317Iso_Up	585.855	248.306	105.368	765.313	1224.43
FBgn0058006	CG40006	-1.37939	9.37165e-07	317Iso_Up	14.0201	8.14197	8.39646	21.7275	17.8145
FBgn0058298	CG40298	-1.78659	0.000372063	317Iso_Up	3.48704	1.60889	1.73622	6.44487	4.15818
FBgn0069973	CG40485	-1.51727	6.90275e-08	317Iso_Up	130.153	86.7339	56.3559	190.315	187.206
FBgn0038017	CG4115	-1.87874	0.000513481	317Iso_Up	6.47128	4.09536	1.85007	12.4112	7.5285
FBgn0031251	CG4213	-1.84687	0.000377667	317Iso_Up	21.5194	12.4324	7.51412	48.2727	17.8583
FBgn0250862	CG42237	-2.3023	0.00172512	317Iso_Up	2.31982	1.07259	0.626177	5.392	2.18852
FBgn0259101	CG42249	-1.41509	0.0153811	317Iso_Up	2.86442	1.99893	1.33774	3.35006	4.77097
FBgn0259164	CG42269	-2.32849	8.0823e-06	317Iso_Up	3.61555	1.7064	0.910803	6.63631	5.20867
FBgn0259167	CG42272	-1.60265	0.000424478	317Iso_Up	3.87507	2.09644	1.99238	4.97723	6.43424
FBgn0259226	CG42326	-1.09936	1.20828e-05	317Iso_Up	21.3401	14.9188	13.8328	27.1514	29.4574
FBgn0259229	CG42329	-1.22499	0.000163808	317Iso_Up	9.00385	5.1192	6.29023	11.8688	12.7372
FBgn0259233	CG42331	-1.1686	0.00678031	317Iso_Up	10.0013	5.36297	7.65644	10.1778	16.8078
FBgn0259711	CG42365	1.23391	0.00058025	317Grp_Up	7.66507	10.0434	12.0112	4.75389	3.85179
FBgn0030745	CG4239	-1.06031	8.29975e-06	317Iso_Up	55.0159	41.4899	33.9274	74.3075	70.339
FBgn0259992	CG42489	-1.5921	0.0230564	317Iso_Up	1.52873	0.731315	0.88234	2.13766	2.3636
FBgn0260429	CG42524	1.27781	0.000372942	317Grp_Up	7.69594	12.0911	10.2465	4.59437	3.85179
FBgn0260658	CG42541	1.32476	2.70528e-11	317Grp_Up	331.903	509.775	461.065	189.964	166.809
FBgn0031389	CG4259	-1.67774	2.82101e-05	317Iso_Up	5.13142	2.34021	2.84626	6.89155	8.44768
FBgn0034741	CG4269	1.72632	4.42783e-08	317Grp_Up	12.7165	17.2103	22.5708	4.91342	6.17162
FBgn0261641	CG42724	1.02777	4.72625e-08	317Grp_Up	178.968	247.916	245.404	115.402	107.15
FBgn0261989	CG42807	-1.71157	0.00778404	317Iso_Up	9.12274	2.14519	6.94487	9.06111	18.3398
FBgn0262035	CG42846	-1.12203	0.00978252	317Iso_Up	7.21984	3.60782	5.97714	8.61444	10.68
FBgn0262481	CG43071	-1.92291	0.00905113	317Iso_Up	1.86848	0.438789	1.19543	2.77576	3.06392
FBgn0262794	CG43175	-6.09601	0.0167841	317Iso_Up	0.215162	0	0	0.510485	0.350163
FBgn0262808	CG43179	-3.48762	0.00797199	317Iso_Up	0.540844	0.146263	0.0569252	1.08478	0.875407
FBgn0026878	CG4325	-1.36169	0.0119646	317Iso_Up	2.87292	1.46263	1.93546	3.54149	4.55212
FBgn0263997	CG43740	1.15117	8.6078e-09	317Grp_Up	103.863	150.017	143.765	64.2892	57.3829
FBgn0264711	CG43980	-1.96868	0.0222703	317Iso_Up	2.71999	1.99893	0.398476	4.84961	3.63294
FBgn0039073	CG4408	-1.7346	0.00655008	317Iso_Up	7.15952	1.99893	5.03788	6.41297	15.1883
FBgn0264911	CG44102	2.32783	0.0211533	317Grp_Up	0.850774	1.7064	1.16697	0.223337	0.306392
FBgn0035982	CG4461	-1.38525	0.000179143	317Iso_Up	69.0435	47.2429	33.8989	69.9365	125.096
FBgn0038752	CG4462	-1.00977	0.000111267	317Iso_Up	17.834	11.6523	13.349	23.7057	22.6293
FBgn0035969	CG4476	-1.45364	0.000806958	317Iso_Up	4.36559	2.73024	2.24854	5.74296	6.74063
FBgn0266000	CG44774	1.03105	7.37756e-08	317Grp_Up	248.723	336.746	349.378	163.802	144.967
FBgn0037844	CG4570	2.39295	0.0179079	317Grp_Up	0.810449	1.21886	1.53698	0.223337	0.262622
FBgn0031306	CG4577	1.10936	3.43666e-09	317Grp_Up	933.374	1208.81	1409.69	555.95	559.035
FBgn0029924	CG4586	1.67082	8.5469e-06	317Grp_Up	7.61726	11.4573	12.1535	2.74386	4.11441
FBgn0034733	CG4752	-1.38071	4.05886e-07	317Iso_Up	26.8345	17.9903	13.662	39.8817	35.8042
FBgn0036620	CG4842	-1.43337	6.86286e-10	317Iso_Up	77.9292	47.0479	42.4377	98.8427	123.389
FBgn0036436	CG4914	-1.45101	0.0159096	317Iso_Up	2.26466	1.02384	1.53698	3.47768	3.02015
FBgn0036587	CG4950	-1.22788	0.00504952	317Iso_Up	7.06179	3.16903	5.74944	9.69922	9.62948
FBgn0032637	CG5050	1.45769	0.00244341	317Grp_Up	3.54527	5.60675	5.00941	1.59527	1.96967
FBgn0031907	CG5171	-1.61268	1.88741e-10	317Iso_Up	26.554	12.7249	15.1136	35.3511	43.0263
FBgn0040383	CG5254	-1.05751	1.80255e-06	317Iso_Up	33.2149	21.7932	23.7947	44.5079	42.7636
FBgn0038983	CG5326	-1.29148	5.12008e-06	317Iso_Up	30.9261	15.8939	22.1439	47.4113	38.2553
FBgn0034364	CG5493	-1.27311	0.00183541	317Iso_Up	18.2189	8.09322	14.5159	20.1961	30.0702
FBgn0039527	CG5639	-2.09189	3.31278e-09	317Iso_Up	10.3815	4.04661	4.38324	13.0493	20.0468
FBgn0035948	CG5644	-1.24623	2.52163e-06	317Iso_Up	38.6102	27.6925	20.8631	51.3038	54.5816
FBgn0032167	CG5853	-1.0516	0.000137157	317Iso_Up	22.9248	15.1626	16.3944	34.0111	26.1309
FBgn0027586	CG5867	-1.14088	1.93961e-07	317Iso_Up	135.81	80.3471	99.1921	170.981	192.721
FBgn0039495	CG5909	-1.22351	5.63172e-08	317Iso_Up	32.4212	21.5007	19.7246	45.4332	43.0263
FBgn0029835	CG5921	-1.08143	0.000631764	317Iso_Up	9.87873	7.11813	6.31869	13.5598	12.5183
FBgn0032494	CG5945	-1.02104	0.000813854	317Iso_Up	212.677	129.686	167.588	219.509	333.924
FBgn0031913	CG5958	-2.06532	2.03412e-09	317Iso_Up	27.5047	10.1409	12.552	31.6501	55.6759
FBgn0038676	CG6026	-1.91999	0.000296586	317Iso_Up	2.74958	1.07259	1.3662	3.70102	4.85851
FBgn0039488	CG6066	1.08654	0.000176471	317Grp_Up	13.9519	20.8181	18.1307	8.45491	8.40391
FBgn0027581	CG6191	1.15601	0.0198182	317Grp_Up	4.92323	5.60675	8.31107	2.36099	3.41409
FBgn0038072	CG6225	-1.16653	7.26813e-05	317Iso_Up	22.8737	17.3078	12.5805	30.661	30.9456
FBgn0038720	CG6231	-1.09377	1.81709e-06	317Iso_Up	55.9979	35.4444	40.1607	81.199	67.1875
FBgn0037807	CG6293	-1.33635	5.17356e-05	317Iso_Up	14.1499	8.87329	8.16876	16.2717	23.2858
FBgn0032287	CG6415	-1.81106	7.7719e-07	317Iso_Up	25.8339	9.01955	15.4267	31.2672	47.6221
FBgn0034166	CG6472	-1.2	0.000210835	317Iso_Up	8.4664	5.6555	5.23712	11.1988	11.7742
FBgn0040606	CG6503	-1.57661	1.70981e-07	317Iso_Up	143.91	61.4792	92.6457	173.469	248.047
FBgn0032973	CG6675	-2.20315	8.8018e-05	317Iso_Up	2.26048	0.975086	0.76849	3.79673	3.50163
FBgn0031926	CG6739	-1.83738	0.000275523	317Iso_Up	8.52435	4.87543	3.10242	17.8032	8.31637
FBgn0032652	CG6870	-2.0045	1.85861e-13	317Iso_Up	13.5171	5.50924	6.00561	19.7494	22.8044
FBgn0030955	CG6891	-2.13074	0.000692131	317Iso_Up	8.18302	3.75408	2.76087	20.4832	5.73392
FBgn0035896	CG6983	-1.21079	1.23705e-07	317Iso_Up	145.165	100.775	84.6762	215.138	180.071
FBgn0030895	CG7135	-1.95842	0.0421668	317Iso_Up	36.2201	9.40958	22.4285	38.414	74.6285
FBgn0031942	CG7203	-3.04266	0.0233718	317Iso_Up	695.425	275.316	45.7678	1327.36	1133.26
FBgn0031940	CG7214	-4.34345	8.93203e-05	317Iso_Up	432.395	70.5475	16.7075	669.31	973.015
FBgn0036501	CG7272	-1.21623	2.84451e-05	317Iso_Up	39.3697	26.0348	24.1647	64.034	43.2451
FBgn0030968	CG7322	-1.6942	2.16052e-08	317Iso_Up	30.3108	12.2373	18.2445	39.2435	51.5177
FBgn0038716	CG7342	-2.92347	3.43653e-06	317Iso_Up	2.13163	0.731315	0.370014	3.5734	3.85179
FBgn0037581	CG7352	1.29891	0.0188011	317Grp_Up	2.95859	4.38789	4.21246	1.30812	1.9259
FBgn0032262	CG7384	-1.57717	0.00089063	317Iso_Up	4.34052	2.38896	2.24854	4.97723	7.74735
FBgn0036768	CG7402	-1.1714	0.00633348	317Iso_Up	4.98985	3.70533	2.8178	6.47678	6.95949
FBgn0035817	CG7409	-1.21506	0.00109265	317Iso_Up	72.1002	56.6038	35.2936	76.5728	119.931
FBgn0036762	CG7430	-1.1263	2.05368e-06	317Iso_Up	480.037	349.91	288.127	579.464	702.646
FBgn0036742	CG7497	-1.24613	0.00393256	317Iso_Up	7.70138	4.68041	5.00941	13.3683	7.74735
FBgn0036157	CG7560	-1.06129	0.00467944	317Iso_Up	9.63399	6.24055	6.94487	10.3373	15.0132
FBgn0039728	CG7896	-2.2768	0.00295278	317Iso_Up	4.71036	2.82775	0.654639	10.3692	4.98982
FBgn0038115	CG7966	-1.01882	0.00107757	317Iso_Up	17.899	10.7747	14.2028	20.7066	25.9121
FBgn0040832	CG8012	-1.06752	0.0036007	317Iso_Up	14.7512	11.2135	8.96571	23.4185	15.4072
FBgn0037607	CG8036	-1.43158	7.95953e-07	317Iso_Up	232.053	124.957	142.057	254.573	406.627
FBgn0034010	CG8157	1.41928	0.000187524	317Grp_Up	13.0144	21.9394	16.7645	5.16866	8.18506
FBgn0033365	CG8170	-1.929	4.00244e-05	317Iso_Up	4.89198	2.82775	1.56544	8.04014	7.13457
FBgn0034045	CG8249	-1.55782	7.87619e-07	317Iso_Up	8.16075	4.33913	4.46863	12.4112	11.4241
FBgn0037746	CG8478	1.89015	0.0273992	317Grp_Up	1.12135	1.51138	2.07777	0.414769	0.481474
FBgn0035791	CG8539	-2.01349	3.05632e-09	317Iso_Up	13.8894	5.07045	6.68871	17.5798	26.2184
FBgn0040837	CG8620	1.37408	3.57656e-09	317Grp_Up	23.6644	34.9081	34.9521	12.0602	12.7372
FBgn0034479	CG8654	-1.94617	3.07196e-08	317Iso_Up	11.4965	4.19287	5.89176	14.8041	21.0973
FBgn0036380	CG8757	-1.78537	7.93797e-08	317Iso_Up	8.75796	4.09536	4.29785	11.5816	15.057
FBgn0033702	CG8854	-1.28168	8.12703e-05	317Iso_Up	7.84224	4.68041	5.00941	10.9116	10.7675
FBgn0038404	CG8925	-1.95881	0.0355369	317Iso_Up	0.9695	0.487543	0.370014	1.88241	1.13803
FBgn0030617	CG9095	-1.84243	0.000384696	317Iso_Up	5.63768	3.16903	2.10623	11.454	5.82146
FBgn0035189	CG9119	-1.90903	1.24091e-12	317Iso_Up	65.1845	25.9373	32.6466	83.6238	118.53
FBgn0030629	CG9123	1.01488	0.00221228	317Grp_Up	23.4256	38.4672	25.901	14.1022	15.2321
FBgn0031775	CG9150	-1.25283	5.64625e-05	317Iso_Up	58.4676	44.6102	28.6049	74.6904	85.965
FBgn0038181	CG9297	-1.83883	3.64281e-11	317Iso_Up	335.542	188.143	124.182	469.583	560.261
FBgn0032889	CG9331	-1.08256	7.86877e-06	317Iso_Up	104.296	64.1607	77.4752	122.134	153.415
FBgn0037714	CG9396	-1.56919	5.72226e-06	317Iso_Up	17.5082	7.80069	10.9581	20.547	30.7268
FBgn0030562	CG9400	-1.58887	0.00125757	317Iso_Up	18.1433	13.5049	5.74944	32.703	20.6158
FBgn0037721	CG9427	-1.44099	1.91379e-09	317Iso_Up	65.0689	42.0262	32.3904	93.8974	91.9615
FBgn0037730	CG9444	-1.45897	0.000184227	317Iso_Up	9.57404	6.67934	4.21246	12.3474	15.057
FBgn0034618	CG9485	-1.31176	2.55754e-09	317Iso_Up	188.833	124.665	105.312	244.395	280.962
FBgn0031800	CG9497	-1.55586	2.05791e-06	317Iso_Up	25.8353	13.0174	14.8859	28.7786	46.6592
FBgn0031801	CG9498	-1.07887	7.01019e-07	317Iso_Up	51.3942	32.8604	37.0014	64.5445	71.1706
FBgn0030593	CG9512	-2.6617	6.78755e-16	317Iso_Up	241.008	84.8813	56.0428	518.685	304.423
FBgn0030592	CG9514	-1.96825	2.26967e-05	317Iso_Up	4.23656	2.2427	1.48005	7.40203	5.82146
FBgn0030588	CG9521	-1.17462	0.000304395	317Iso_Up	9.73907	6.97187	5.72098	12.8259	13.4375
FBgn0030587	CG9522	-6.28246	0.00972397	317Iso_Up	0.245024	0	0	0.54239	0.437704
FBgn0030159	CG9689	-2.07415	2.26963e-17	317Iso_Up	21.5181	9.36083	8.33954	36.2444	32.1274
FBgn0003060	CG9757	2.72107	4.18008e-18	317Grp_Up	9.69645	15.4551	18.5861	2.4248	2.31983
FBgn0038160	CG9759	3.02186	9.43361e-39	317Grp_Up	54.2689	95.2172	99.7329	9.47588	12.6496
FBgn0030763	CG9782	-1.73265	4.40603e-06	317Iso_Up	10.8719	6.14304	4.61094	19.9089	12.8247
FBgn0034860	CG9812	-1.25694	2.80417e-10	317Iso_Up	175.887	99.6538	120.482	240.662	242.75
FBgn0032472	CG9928	-1.13164	0.00265134	317Iso_Up	52.1961	25.8885	43.4908	54.6219	84.7832
FBgn0031451	CG9961	1.57635	0.03858	317Grp_Up	1.38138	1.99893	2.22008	0.606201	0.700326
FBgn0034553	CG9993	3.1456	0.0239962	317Grp_Up	0.487836	0.828823	0.939265	0.095716	0.0875407
FBgn0029948	CheA7a	-1.43258	0.00384418	317Iso_Up	4.95759	3.65657	2.07777	7.88061	6.21539
FBgn0038142	CheA87a	1.57572	3.31064e-08	317Grp_Up	13.6062	21.3056	20.2654	5.80677	7.04703
FBgn0267435	chp	-1.8573	3.84907e-18	317Iso_Up	1670.79	862.074	678.463	2578.17	2564.46
FBgn0022702	Cht2	-2.01777	1.11601e-06	317Iso_Up	20.7777	11.9448	5.66405	37.4888	28.013
FBgn0035398	Cht7	-2.52724	0.0440154	317Iso_Up	14.4481	6.7281	2.39086	35.5425	13.1311
FBgn0052251	Claspin	-1.37401	0.0442369	317Iso_Up	1.81251	1.21886	0.939265	2.90338	2.18852
FBgn0036756	Cln3	-2.6124	6.22788e-11	317Iso_Up	6.67909	2.48647	1.5939	9.98637	12.6496
FBgn0035767	Cln7	-1.00576	0.000291449	317Iso_Up	23.0728	13.895	18.5007	28.9062	30.9894
FBgn0263257	Cngl	1.07467	5.36129e-06	317Grp_Up	489.43	689.532	672.827	341.929	253.43
FBgn0035282	CNMa	1.9374	0.00172054	317Grp_Up	6.7924	5.26547	16.6506	2.23337	3.02015
FBgn0000299	Col4a1	-1.37746	5.01097e-10	317Iso_Up	304.791	187.85	171.829	381.205	478.279
FBgn0261269	conv	-1.22391	0.00223005	317Iso_Up	6.2718	3.60782	4.35478	9.85874	7.26588
FBgn0031830	COX5B	-1.01528	1.43121e-05	317Iso_Up	302.756	217.737	205.898	344.258	443.131
FBgn0085201	COX7AL2	-1.81947	2.28456e-06	317Iso_Up	15.9374	7.99571	7.03026	17.1651	31.5584
FBgn0000357	Cp18	1.16718	0.0225901	317Grp_Up	3.32829	4.68041	4.75325	1.69098	2.18852
FBgn0261714	Cpn	-1.71554	2.55133e-16	317Iso_Up	806.201	441.617	359.511	1260.26	1163.42
FBgn0015623	Cpr	-1.41134	8.9283e-13	317Iso_Up	185.498	100.531	114.903	247.872	278.686
FBgn0030394	Cpr11A	-2.62865	3.66424e-05	317Iso_Up	4.17917	1.95017	0.597714	8.3911	5.77769
FBgn0030398	Cpr11B	-1.19506	0.00516947	317Iso_Up	6.18143	3.90035	4.07015	10.1459	6.60932
FBgn0033602	Cpr47Ee	-1.89074	1.39845e-12	317Iso_Up	16.5129	6.77685	8.16876	23.7057	27.4002
FBgn0033728	Cpr49Ae	-1.74162	2.49938e-17	317Iso_Up	52.2831	26.7174	24.6201	82.0286	75.7665
FBgn0033730	Cpr49Ag	-1.88733	8.99682e-07	317Iso_Up	40.2715	24.7672	11.7835	59.8863	64.6488
FBgn0033867	Cpr50Ca	-2.46164	0.00047676	317Iso_Up	1.67395	0.731315	0.398476	3.15863	2.40737
FBgn0035280	Cpr62Bb	-1.31877	0.00149911	317Iso_Up	12.3122	8.97079	6.00561	21.1851	13.0873
FBgn0036619	Cpr72Ec	-1.57639	0.000112038	317Iso_Up	229.7	158.061	86.9532	240.853	432.933
FBgn0038819	Cpr92F	-3.23346	3.26475e-08	317Iso_Up	9.71756	2.92526	1.1385	25.0457	9.76079
FBgn0035383	CPT2	-1.13678	3.59997e-05	317Iso_Up	16.284	9.94588	11.5843	20.4513	23.1545
FBgn0085732	CR40190	1.58065	0.00393256	317Grp_Up	5.53991	5.89927	11.0719	3.35006	1.83835
FBgn0085734	CR40450	1.63105	0.0100094	317Grp_Up	3.0621	6.1918	3.24473	1.14859	1.66327
FBgn0286919	CR46419	-2.38373	0.0453267	317Iso_Up	0.611743	0.292526	0.142313	1.1805	0.831637
FBgn0000370	crc	-1.0297	2.06058e-07	317Iso_Up	146.708	94.2421	109.78	189.39	193.421
FBgn0053503	Cyp12d1-d	-1.48329	1.20848e-06	317Iso_Up	9.03678	4.97294	5.15173	13.5917	12.4308
FBgn0010383	Cyp18a1	-1.33148	5.99403e-05	317Iso_Up	13.337	9.50709	6.63178	19.5261	17.6832
FBgn0036910	Cyp305a1	-1.04075	5.32335e-05	317Iso_Up	20.993	13.5049	15.5121	26.0666	28.8884
FBgn0031432	Cyp309a1	-2.79324	1.25313e-09	317Iso_Up	11.8429	3.65657	2.78933	12.475	28.4507
FBgn0041337	Cyp309a2	-2.41074	6.49581e-11	317Iso_Up	8.46443	3.12028	2.64702	11.3264	16.764
FBgn0015032	Cyp4c3	-1.98731	2.35052e-10	317Iso_Up	21.9519	11.6035	7.34335	35.9892	32.8715
FBgn0035344	Cyp4d20	-1.06602	0.00642142	317Iso_Up	12.0251	6.8256	9.59189	12.7302	18.9526
FBgn0015033	Cyp4d8	-1.09093	0.00642258	317Iso_Up	10.7	5.26547	9.16495	13.4002	14.9695
FBgn0015034	Cyp4e1	-1.18215	0.00168487	317Iso_Up	5.7024	3.51031	3.87091	7.59347	7.83489
FBgn0014469	Cyp4e2	-1.06951	3.4277e-05	317Iso_Up	60.7653	36.1757	46.821	72.0422	88.0222
FBgn0015035	Cyp4e3	-1.33796	0.00100419	317Iso_Up	55.0515	43.8301	22.2293	90.8983	63.2482
FBgn0030615	Cyp4s3	-1.7158	0.000441239	317Iso_Up	3.76794	1.75516	1.99238	6.85964	4.46458
FBgn0031726	Cyp6a16	-2.93351	0.00292941	317Iso_Up	0.902841	0.292526	0.170776	2.01004	1.13803
FBgn0034756	Cyp6d2	-1.08643	0.0368278	317Iso_Up	5.06146	2.8765	3.9563	5.00914	8.40391
FBgn0038194	Cyp6d5	-1.36694	4.44435e-09	317Iso_Up	176.281	108.82	100.302	215.52	280.48
FBgn0025454	Cyp6g1	-1.64547	1.34388e-06	317Iso_Up	1660.1	714.153	1003.48	1754.22	3168.54
FBgn0031182	Cyp6t1	-1.62998	0.000624813	317Iso_Up	6.62968	2.68149	4.184	7.1787	12.4746
FBgn0015039	Cyp9b2	-1.45177	0.00014228	317Iso_Up	63.0544	27.4487	44.4586	65.1507	115.16
FBgn0030001	cyr	-1.35512	0.00885789	317Iso_Up	5.14329	4.09536	2.07777	6.82774	7.57227
FBgn0004629	Cys	-1.12283	1.95065e-10	317Iso_Up	509.243	338.989	339.359	679.264	679.36
FBgn0038511	cysu	-2.46484	0.0465171	317Iso_Up	1.72886	0.926332	0.227701	5.10485	0.656555
FBgn0000406	Cyt-b5-r	-1.51119	1.25826e-05	317Iso_Up	221.027	91.9019	152.986	248	391.219
FBgn0284248	Cyt-c-p	-1.06014	1.34915e-06	317Iso_Up	586.292	438.155	364.805	816.712	725.494
FBgn0031860	Daao2	-1.46723	0.00577057	317Iso_Up	13.4167	4.19287	10.9581	14.836	23.6798
FBgn0086251	del	1.28543	0.00278182	317Grp_Up	4.43226	6.1918	6.68871	2.61624	2.23229
FBgn0264291	Det	1.41873	0.000550944	317Grp_Up	4.95514	7.94695	6.80256	2.48861	2.58245
FBgn0033215	Dgat2	-1.5063	0.00181832	317Iso_Up	3.45263	1.60889	2.19162	4.62627	5.38375
FBgn0032048	Dh31	1.26881	3.33141e-08	317Grp_Up	144.377	183.072	235.072	86.3996	72.9652
FBgn0012344	Dh44	1.09468	1.02012e-08	317Grp_Up	131.045	173.712	192.749	80.8162	76.9045
FBgn0033885	DJ-1alpha	1.92326	4.05723e-05	317Grp_Up	4.16343	7.41066	5.97714	1.34002	1.9259
FBgn0000477	DNaseII	-1.69652	0.000230458	317Iso_Up	39.3437	17.7466	21.8593	32.7668	85.002
FBgn0038916	dnd	-1.14635	0.0357364	317Iso_Up	3.98475	2.58398	2.67548	6.82774	3.85179
FBgn0030607	dob	-1.02418	0.0499381	317Iso_Up	9.97095	5.80176	8.08337	8.35919	17.6395
FBgn0004240	DptA	-1.79235	0.000343853	317Iso_Up	7.42834	2.34021	4.72479	8.423	14.2254
FBgn0034407	DptB	-3.23011	0.00313498	317Iso_Up	34.1879	4.24163	10.0473	32.0329	90.4296
FBgn0260006	drd	-1.92436	3.48324e-06	317Iso_Up	18.9366	10.0434	6.83102	38.9564	19.9155
FBgn0283461	Drs	-3.89467	0.000484317	317Iso_Up	61.5621	6.14304	10.7304	46.6775	182.697
FBgn0000500	Dsk	2.62493	4.80895e-31	317Grp_Up	105.384	163.229	203.65	24.2799	30.3766
FBgn0283531	Duox	-1.70579	5.67293e-07	317Iso_Up	12.137	5.99678	6.14792	22.0466	14.3567
FBgn0000527	e	-1.56594	3.25178e-06	317Iso_Up	35.2855	20.8181	17.0776	64.9911	38.2553
FBgn0004181	Ebp	-6.16683	0.0134897	317Iso_Up	0.226105	0	0	0.510485	0.393933
FBgn0000542	ec	-1.51028	0.000152207	317Iso_Up	10.0174	5.55799	5.52174	18.4413	10.5487
FBgn0000451	ect	-1.71446	0.0012614	317Iso_Up	3.46883	1.75516	1.70776	6.6044	3.80802
FBgn0260746	Ect3	-2.113	2.28316e-17	317Iso_Up	33.6402	11.7985	15.199	48.9109	58.6523
FBgn0000551	Edg78E	1.61623	0.0200977	317Grp_Up	1.61009	2.38896	2.56163	0.701917	0.787866
FBgn0034487	Efhc1.2	1.23886	0.00439125	317Grp_Up	5.37042	6.28931	9.16495	3.09482	2.93261
FBgn0034885	Eglp4	-1.88878	6.74497e-11	317Iso_Up	113.795	46.1703	57.2952	136.363	215.35
FBgn0013949	Elal	-1.01139	0.00522101	317Iso_Up	37.4503	21.4031	31.1381	37.7759	59.4839
FBgn0000592	Est-6	-1.9223	2.02526e-13	317Iso_Up	52.9917	19.453	27.8079	74.6265	90.0794
FBgn0037090	Est-Q	-1.30248	0.000197957	317Iso_Up	12.4119	6.04554	9.10803	15.4103	19.0839
FBgn0005660	Ets21C	1.366	0.000230458	317Grp_Up	7.02635	9.50709	11.1858	3.25434	4.15818
FBgn0038665	euc	-1.16633	2.37669e-05	317Iso_Up	38.2507	26.7174	23.2255	44.1889	58.8711
FBgn0033668	exp	-1.78298	0.000614216	317Iso_Up	13.3029	8.97079	3.81399	25.939	14.488
FBgn0000320	eya	-1.07336	6.29876e-06	317Iso_Up	53.4376	39.6373	33.1874	67.1288	73.7968
FBgn0031414	eys	-1.53385	2.33444e-11	317Iso_Up	544.541	337.477	256.391	776.863	807.432
FBgn0033354	FANCI	1.87623	0.00187822	317Grp_Up	2.28434	3.36405	3.9563	1.11669	0.700326
FBgn0023550	FarO	-2.08401	5.13135e-05	317Iso_Up	2.87373	0.926332	1.39467	4.40293	4.77097
FBgn0283427	FASN1	-1.29943	0.000251079	317Iso_Up	554.202	281.117	399.956	548.931	986.803
FBgn0042627	FASN2	-2.26721	0.00479006	317Iso_Up	3.39059	1.21886	1.28082	9.09302	1.96967
FBgn0026721	Fatp3	-1.00114	0.00831842	317Iso_Up	62.6409	28.8626	39.9615	75.9028	105.837
FBgn0034999	fat-spondin	-1.52372	1.22245e-07	317Iso_Up	17.7631	9.79962	15.199	19.0475	27.0063
FBgn0032820	fbp	-1.42118	8.6037e-07	317Iso_Up	62.7614	37.1995	35.3221	70.5427	107.981
FBgn0000640	Fbp2	-5.68227	0.0261188	317Iso_Up	2.20619	0.0975086	0.0853878	8.423	0.218852
FBgn0038385	Fbxl7	-1.18083	0.00292053	317Iso_Up	12.3951	10.0434	6.06253	18.5051	14.9695
FBgn0039667	FipoQ	-1.11644	2.32435e-05	317Iso_Up	33.5141	24.1821	20.6069	40.2007	49.0666
FBgn0038914	fit	-4.42448	0.00129567	317Iso_Up	40.6729	1.36512	6.54639	42.115	112.665
FBgn0036688	Fit2	-1.04888	0.0068162	317Iso_Up	8.98518	7.41066	5.00941	12.3155	11.2052
FBgn0030594	fiz	-2.63339	1.10724e-05	317Iso_Up	2.66493	0.438789	1.11004	4.69008	4.42081
FBgn0000658	fj	-1.23596	0.0119041	317Iso_Up	13.8018	10.5797	6.85948	25.5562	12.2119
FBgn0034943	Fmo-1	-1.59617	3.37786e-07	317Iso_Up	18.3027	7.94695	11.385	23.5461	30.3329
FBgn0033079	Fmo-2	-1.86925	3.32627e-09	317Iso_Up	24.1629	13.5537	8.65263	40.3921	34.0533
FBgn0086675	fne	1.15457	0.000467047	317Grp_Up	1227.18	1737.26	1734.91	927.264	509.268
FBgn0032773	fon	-1.35315	2.92654e-05	317Iso_Up	166.691	84.54	114.932	176.787	290.504
FBgn0035612	frm	-1.45866	0.0225812	317Iso_Up	5.01772	3.16903	2.53317	10.5607	3.80802
FBgn0029769	frma	-1.02913	0.0168275	317Iso_Up	20.7136	9.6046	19.2122	23.3547	30.683
FBgn0259878	Fs	-1.04673	6.31055e-05	317Iso_Up	24.9242	18.8679	15.5406	32.7668	32.5214
FBgn0001083	fw	-1.84373	2.63706e-06	317Iso_Up	26.5248	16.674	7.99799	39.6264	41.8007
FBgn0035192	galene	-1.45149	0.0060039	317Iso_Up	2.75338	1.75516	1.39467	3.92435	3.93933
FBgn0263199	Galk	-1.36074	1.6672e-05	317Iso_Up	60.3982	26.9124	45.0563	76.3494	93.2746
FBgn0263200	Galt	-1.45395	1.11895e-06	317Iso_Up	75.0909	41.6849	43.7185	82.3795	132.58
FBgn0001091	Gapdh1	-1.30806	3.24834e-07	317Iso_Up	1100.85	704.549	639.184	1264.25	1795.42
FBgn0000053	Gart	-1.61335	3.17188e-11	317Iso_Up	84.307	41.0024	47.4756	106.628	142.122
FBgn0026077	Gasp	-2.03262	0.0372617	317Iso_Up	104.638	58.6027	28.8041	229.335	101.81
FBgn0004623	Gbeta76C	-1.47966	1.07578e-09	317Iso_Up	2306.69	1480.33	1104.46	3095.49	3546.49
FBgn0034200	Gbp2	-1.06915	0.00255685	317Iso_Up	61.5599	32.0316	52.1719	65.9164	96.1197
FBgn0039031	Gbp3	-1.04302	0.0301426	317Iso_Up	34.3857	15.2113	32.4189	33.4049	56.5075
FBgn0035245	GC	1.12965	3.37554e-08	317Grp_Up	51.2701	69.3774	75.0274	30.6929	29.9827
FBgn0023515	Gcna	1.04067	0.00258706	317Grp_Up	8.47023	10.4822	12.922	5.13676	5.33998
FBgn0001098	Gdh	-1.31932	1.50715e-09	317Iso_Up	957.667	617.522	544.66	1203.05	1465.43
FBgn0287209	Gfat1	-1.10538	1.18842e-05	317Iso_Up	65.0341	46.9992	40.303	97.0241	75.8103
FBgn0011770	Gip	-1.52358	3.26475e-08	317Iso_Up	27.7519	16.479	14.0036	34.8725	45.6525
FBgn0035266	Gk2	-1.25218	3.42781e-06	317Iso_Up	36.9011	22.3295	23.937	42.8169	58.521
FBgn0038934	Gld2	1.80166	0.000294347	317Grp_Up	3.96684	5.94803	6.63178	2.10575	1.1818
FBgn0027657	glob1	-1.08757	9.64585e-07	317Iso_Up	124.555	79.8596	88.8602	148.424	181.078
FBgn0001114	Glt	-2.10837	1.33288e-12	317Iso_Up	239.1	84.5887	108.414	288.137	475.259
FBgn0264000	GluRIB	1.05607	0.000528305	317Grp_Up	120.6	178.197	156.117	90.8344	57.2516
FBgn0004507	GlyP	-1.58819	2.99905e-14	317Iso_Up	783.084	436.546	395.203	1041.01	1259.58
FBgn0266064	GlyS	-1.17134	5.11446e-10	317Iso_Up	165.429	111.16	104.258	223.592	222.704
FBgn0040321	GNBP3	-1.2061	0.000275557	317Iso_Up	41.1134	20.6231	32.1058	46.9008	64.8239
FBgn0027528	goe	-1.30838	8.97742e-09	317Iso_Up	42.1572	27.79	23.6809	59.9501	57.2079
FBgn0001125	Got2	-1.04671	2.52669e-06	317Iso_Up	329.67	219.394	235.613	382.768	480.905
FBgn0063368	Gpb5	1.25107	0.000116679	317Grp_Up	12.9898	20.3793	17.0776	6.31725	8.18506
FBgn0001128	Gpdh1	-1.26427	3.51651e-10	317Iso_Up	422.187	283.701	242.16	582.272	580.614
FBgn0263048	Gpdh3	1.00916	7.71265e-05	317Grp_Up	24.502	35.8832	31.3942	15.7612	14.9695
FBgn0001145	Gs2	-1.08498	1.04981e-09	317Iso_Up	789.887	537.955	532.706	1029.78	1059.11
FBgn0033817	GstE14	-1.35212	9.85001e-05	317Iso_Up	12.2633	8.77578	5.92022	18.2498	16.1075
FBgn0010226	GstS1	-1.21273	6.61791e-05	317Iso_Up	114.234	77.0806	68.6802	192.293	118.88
FBgn0027790	GV1	-1.02937	3.24834e-07	317Iso_Up	59.1978	41.2949	41.0146	77.4023	77.0796
FBgn0010197	Gyc32E	1.12074	0.0214116	317Grp_Up	4.47891	5.16796	7.42873	2.9991	2.31983
FBgn0286508	Had1	-1.57186	8.78669e-09	317Iso_Up	114.076	67.3297	54.8474	137.991	196.135
FBgn0061356	Hao	-2.25755	6.29618e-14	317Iso_Up	29.6874	9.75086	12.2389	38.414	58.3459
FBgn0010113	hdc	1.41203	2.53845e-12	317Grp_Up	220.506	314.758	340.783	124.016	102.466
FBgn0005619	Hdc	-1.32318	2.33444e-11	317Iso_Up	120.53	73.034	73.035	157.293	178.758
FBgn0001187	Hex-C	-1.2544	6.08962e-05	317Iso_Up	48.9614	26.4736	34.8951	53.6328	80.8438
FBgn0014000	Hf	-1.06554	0.00181072	317Iso_Up	23.6754	13.8462	18.5291	25.0776	37.2486
FBgn0286723	hll	-2.15859	0.00488752	317Iso_Up	1.29584	0.633806	0.398476	2.13766	2.01344
FBgn0001208	Hn	-1.4203	7.86877e-06	317Iso_Up	142.179	61.4792	103.234	174.075	229.926
FBgn0031649	hoe2	-1.02865	4.28796e-06	317Iso_Up	90.4702	68.4023	57.3806	116.167	119.931
FBgn0013278	Hsp70Bb	-1.21355	0.0371751	317Iso_Up	2.32229	1.36512	1.5939	3.22244	3.1077
FBgn0028374	Hug	2.16572	2.6896e-25	317Grp_Up	220.302	382.965	348.268	67.5117	82.4634
FBgn0031294	IA-2	1.21128	3.59094e-10	317Grp_Up	7932.36	11084.9	11623.6	4897.31	4123.56
FBgn0086693	iav	1.79419	0.0228502	317Grp_Up	1.28299	1.80391	2.24854	0.510485	0.569015
FBgn0265577	IBIN	-3.19947	0.0185315	317Iso_Up	0.754933	0.146263	0.170776	0.382864	2.31983
FBgn0013763	Idgf6	-1.03831	0.00797199	317Iso_Up	214.213	116.328	181.107	199.185	360.23
FBgn0001248	Idh	-1.13188	2.85867e-06	317Iso_Up	238.042	144.215	171.886	276.364	359.705
FBgn0027291	Idh3a	-1.17735	6.36567e-07	317Iso_Up	349.431	256.935	196.363	464.222	480.205
FBgn0038922	Idh3b	-1.02108	4.94956e-07	317Iso_Up	263.935	194.676	173.508	332.358	355.196
FBgn0039358	Idh3g	-1.03473	1.84007e-08	317Iso_Up	306.848	213.056	212.53	389.883	411.923
FBgn0001259	in	-1.07227	0.0208173	317Iso_Up	3.75411	2.43772	2.67548	4.91342	4.98982
FBgn0004784	inaC	-1.07312	2.8135e-07	317Iso_Up	987.2	729.706	614.479	1338.08	1266.54
FBgn0259918	inaF-B	-3.08181	0.00150046	317Iso_Up	23.5304	8.14197	2.53317	35.2554	48.1912
FBgn0085350	inaF-C	-1.90466	0.00374435	317Iso_Up	1.99745	1.07259	0.740027	2.45671	3.72048
FBgn0031434	insv	1.08809	0.000341372	317Grp_Up	12.9003	15.8939	20.123	7.88061	7.70358
FBgn0027108	Inx2	-1.3126	6.65141e-06	317Iso_Up	102.747	72.1564	52.7981	165.971	120.062
FBgn0050295	Ipk1	1.95476	1.49536e-11	317Grp_Up	25.5871	33.348	49.3826	9.15683	10.4611
FBgn0036757	Ir75a	2.97449	3.07196e-08	317Grp_Up	4.06237	4.92419	9.62035	0.829538	0.875407
FBgn0031305	Iris	1.49307	0.0257745	317Grp_Up	3.955	4.38789	7.51412	1.11669	2.8013
FBgn0086677	jeb	1.35363	3.13489e-10	317Grp_Up	533.876	807.128	762.854	316.82	248.703
FBgn0034076	Jhedup	-5.02645	0.0194561	317Iso_Up	0.664057	0.0975086	0	0.0638106	2.49491
FBgn0027339	jim	1.2334	8.64329e-05	317Grp_Up	545.927	776.9	792.313	391.223	223.273
FBgn0263973	jv	-1.00468	0.000569706	317Iso_Up	17.3743	10.4822	13.9182	23.3866	21.7101
FBgn0035144	Kah	-1.29364	0.0208442	317Iso_Up	14.091	8.62951	8.68109	29.1615	9.8921
FBgn0039155	Kal1	-1.82437	3.71701e-07	317Iso_Up	51.0744	31.5928	16.3375	73.5099	82.8573
FBgn0261955	kdn	-1.54305	2.10602e-11	317Iso_Up	827.426	510.653	387.518	1170.51	1241.02
FBgn0263076	Klp54D	1.16175	0.0142154	317Grp_Up	4.16793	4.97294	6.83102	2.32909	2.53868
FBgn0004379	Klp67A	1.92327	0.0116298	317Grp_Up	1.44224	1.90142	2.73241	0.47858	0.656555
FBgn0261534	l(2)34Fc	-2.06134	3.16767e-09	317Iso_Up	41.7881	21.9394	12.5805	77.3066	55.3257
FBgn0002526	LanA	-1.18238	5.66004e-06	317Iso_Up	17.9907	11.9936	11.3281	23.0356	25.6057
FBgn0261800	LanB1	-1.44522	3.08374e-09	317Iso_Up	38.0752	24.1334	19.3546	52.6119	56.2011
FBgn0267348	LanB2	-1.14207	1.01042e-06	317Iso_Up	27.2702	18.7217	17.3053	37.4249	35.6291
FBgn0037163	laza	-1.08124	6.37603e-06	317Iso_Up	86.3914	63.7706	53.5097	104.809	123.476
FBgn0020642	Lcp65Ac	-1.87409	0.00341128	317Iso_Up	7.61505	5.02169	1.96392	16.5589	6.91572
FBgn0020637	Lcp65Ag2	-1.67981	0.0355369	317Iso_Up	1.43217	0.926332	0.540789	1.72289	2.53868
FBgn0028583	lcs	-5.02894	0.00446821	317Iso_Up	0.521877	0	0.0569252	0.54239	1.48819
FBgn0039354	Lgr3	1.13699	0.00535161	317Grp_Up	6.46365	10.1409	8.11184	4.27531	3.32655
FBgn0033593	Listericin	1.74167	1.62132e-13	317Grp_Up	173.552	289.649	254.74	64.6402	85.1771
FBgn0052865	lncRNA:alphagamma-element:CR32865	4.7635	0.0482937	317Grp_Up	0.29339	0.731315	0.398476	0	0.0437704
FBgn0051044	lncRNA:CR31044	1.26679	0.00212578	317Grp_Up	4.88845	7.45941	6.68871	2.64814	2.75753
FBgn0051451	lncRNA:CR31451	1.19438	0.000629344	317Grp_Up	845.572	1431.13	978.743	608.243	364.169
FBgn0051781	lncRNA:CR31781	1.2	1.69651e-10	317Grp_Up	180.387	243.187	272.188	101.299	104.874
FBgn0052368	lncRNA:CR32368	2.07308	0.00265089	317Grp_Up	2.60548	2.58398	5.97714	1.11669	0.744096
FBgn0261429	lncRNA:CR42646	3.59477	0.00472104	317Grp_Up	0.690897	1.21886	1.33774	0.0319053	0.175081
FBgn0262631	lncRNA:CR43148	1.34399	0.0261188	317Grp_Up	2.22459	3.26654	3.2732	1.30812	1.05049
FBgn0262828	lncRNA:CR43199	1.36377	0.00190096	317Grp_Up	8.11795	12.2861	11.6697	5.58343	2.93261
FBgn0263019	lncRNA:CR43314	1.35743	0.000176993	317Grp_Up	11.6032	19.2092	14.9713	7.24251	4.98982
FBgn0286827	lncRNA:CR43334	1.30197	0.000103656	317Grp_Up	31.5458	46.7554	45.1701	21.6956	12.5621
FBgn0263330	lncRNA:CR43411	-1.45989	0.0121405	317Iso_Up	3.83121	1.46263	2.84626	4.27531	6.74063
FBgn0263406	lncRNA:CR43452	-2.33555	4.57925e-12	317Iso_Up	7.21041	2.779	2.36239	12.5388	11.1614
FBgn0263660	lncRNA:CR43651	2.7411	0.000996343	317Grp_Up	1.31587	2.19394	2.44778	0.446674	0.175081
FBgn0264083	lncRNA:CR43752	1.47837	0.0376725	317Grp_Up	1.72384	2.97401	2.22008	0.95716	0.744096
FBgn0264842	lncRNA:CR44050	3.65344	0.00056258	317Grp_Up	0.972955	2.34021	1.28082	0.095716	0.175081
FBgn0265693	lncRNA:CR44500	2.66198	0.0238791	317Grp_Up	0.644594	1.31637	0.939265	0.191432	0.131311
FBgn0265813	lncRNA:CR44602	2.57869	0.00551462	317Grp_Up	1.17369	1.95017	2.13469	0.47858	0.131311
FBgn0265814	lncRNA:CR44603	1.88439	0.00603732	317Grp_Up	1.83798	3.16903	2.73241	0.925254	0.525244
FBgn0265931	lncRNA:CR44720	1.23689	0.0300741	317Grp_Up	2.55019	3.90035	3.44397	1.49955	1.35688
FBgn0265985	lncRNA:CR44764	1.89385	0.039	317Grp_Up	1.39124	2.68149	1.76468	0.287148	0.831637
FBgn0266095	lncRNA:CR44832	1.85913	1.38747e-14	317Grp_Up	48.6742	78.2507	77.1051	22.6209	16.7203
FBgn0266251	lncRNA:CR44946	-1.33702	0.00133713	317Iso_Up	4.65965	2.48647	3.10242	6.22154	6.82818
FBgn0266851	lncRNA:CR45312	1.96984	0.000640166	317Grp_Up	4.08468	7.31315	5.94868	2.20147	0.875407
FBgn0266983	lncRNA:CR45434	1.77148	1.62251e-05	317Grp_Up	5.60644	9.40958	8.28261	2.80767	1.9259
FBgn0267012	lncRNA:CR45456	-4.68963	0.0103295	317Iso_Up	0.411728	0	0.0569252	1.02097	0.569015
FBgn0267656	lncRNA:CR45994	2.03235	5.76837e-06	317Grp_Up	5.03422	9.84837	6.60332	1.97813	1.70704
FBgn0267665	lncRNA:CR46003	1.4676	0.00398541	317Grp_Up	4.06161	6.24055	5.97714	2.58433	1.44442
FBgn0267666	lncRNA:CR46004	2.01537	0.001174	317Grp_Up	2.81138	5.31422	3.87091	1.40383	0.656555
FBgn0267987	lncRNA:CR46254	2.34694	1.01042e-06	317Grp_Up	3.59431	5.70426	6.48947	1.30812	0.875407
FBgn0287612	lncRNA:CR46481	1.39539	0.0275284	317Grp_Up	1.9873	2.73024	3.15935	1.05288	1.00672
FBgn0026197	lncRNA:noe	1.10693	8.14615e-05	317Grp_Up	5236.56	8327.82	6337.93	3652.43	2628.06
FBgn0019661	lncRNA:roX1	1.24306	1.46956e-08	317Grp_Up	1847.47	2640.19	2680.98	1173.41	895.279
FBgn0267429	lovit	-1.34825	7.40089e-06	317Iso_Up	59.4448	40.2711	30.825	98.9703	67.7127
FBgn0002563	Lsp1beta	-2.09372	0.0053967	317Iso_Up	2.68646	1.7064	0.512327	5.20057	3.32655
FBgn0002565	Lsp2	-7.39768	1.07578e-09	317Iso_Up	83.866	1.56014	0.597714	64.5126	268.794
FBgn0034140	Lst	-1.06634	0.00133296	317Iso_Up	57.2274	30.2764	48.0733	63.9383	86.6215
FBgn0268063	ltl	-1.33759	3.25112e-12	317Iso_Up	92.9349	52.5572	59.2876	131.035	128.86
FBgn0040765	luna	1.08155	0.000164504	317Grp_Up	48.8836	75.6179	60.6538	34.1387	25.1242
FBgn0010100	mAcon1	-1.09123	2.66487e-07	317Iso_Up	851.483	562.04	589.432	1010.51	1243.95
FBgn0262169	magu	-1.10136	5.70125e-06	317Iso_Up	30.1878	18.1366	22.457	39.6264	40.5313
FBgn0285912	mah	2.93341	4.74107e-05	317Grp_Up	1.55326	2.92526	2.61856	0.319053	0.350163
FBgn0267033	mamo	1.02704	0.000820291	317Grp_Up	872.818	1251.57	1152.68	677.159	409.866
FBgn0020633	Mcm7	-2.0693	0.0128763	317Iso_Up	1.12578	0.438789	0.483864	1.43574	2.14475
FBgn0262559	Mdh2	-1.18955	1.33576e-06	317Iso_Up	645.812	439.959	393.922	745.276	1004.09
FBgn0026206	mei-P26	1.23985	0.000639546	317Grp_Up	1433.64	2114.62	2010.28	1077.83	531.81
FBgn0002719	Men	-1.06294	7.05399e-05	317Iso_Up	277.226	177.417	202.568	299.75	429.168
FBgn0264695	Mhc	-1.73859	3.67169e-14	317Iso_Up	2334.2	1283.6	1008.54	3229.97	3814.67
FBgn0027579	mino	-1.05164	0.000124671	317Iso_Up	99.2525	56.3112	80.4637	117.763	142.473
FBgn0036713	Mip	1.53123	3.31372e-13	317Grp_Up	109.143	164.79	166.392	47.5708	57.8206
FBgn0026061	Mipp1	-1.00473	3.9691e-05	317Iso_Up	57.5053	44.3177	36.5175	70.5746	78.6116
FBgn0002772	Mlc1	-1.82196	3.43426e-09	317Iso_Up	555.107	329.579	191.041	903.973	795.833
FBgn0002773	Mlc2	-2.12403	3.35988e-17	317Iso_Up	1553.77	734.435	503.788	2404.35	2572.52
FBgn0259209	Mlp60A	-1.0187	0.0006175	317Iso_Up	221.485	184.73	124.239	263.442	313.527
FBgn0014863	Mlp84B	-1.59237	2.55754e-09	317Iso_Up	281.758	175.223	123.072	375.143	453.592
FBgn0259110	mmd	1.07366	1.09706e-05	317Grp_Up	906.507	1286.63	1235.96	641.01	462.434
FBgn0038662	Mpc1	-1.35058	2.91527e-12	317Iso_Up	81.283	49.5831	47.6179	111.764	116.167
FBgn0034497	Mpcp1	-1.79242	5.46796e-09	317Iso_Up	313.487	188.972	109.837	460.84	494.299
FBgn0026409	Mpcp2	-1.36419	1.53634e-09	317Iso_Up	1299.03	836.38	705.758	1645.52	2008.45
FBgn0259985	Mppe	-1.27808	1.70445e-12	317Iso_Up	160.552	96.9723	101.868	218.87	224.498
FBgn0011581	Ms	1.60039	3.33398e-14	317Grp_Up	283.837	394.91	476.521	120.921	142.998
FBgn0085453	Mthfs	-1.11974	0.00168262	317Iso_Up	23.0745	16.5277	14.2598	23.3866	38.124
FBgn0051720	mthl15	1.6536	0.0412359	317Grp_Up	1.334	2.38896	1.73622	0.510485	0.700326
FBgn0283658	muc	-1.21843	1.22649e-08	317Iso_Up	302.214	210.326	174.39	400.093	424.047
FBgn0052602	Muc12Ea	2.32086	0.0297096	317Grp_Up	0.896636	1.21886	1.82161	0.414769	0.131311
FBgn0052580	Muc14A	2.98052	0.00263278	317Grp_Up	1.00704	1.65765	1.96392	0.319053	0.0875407
FBgn0264272	mwh	-1.21228	6.84383e-07	317Iso_Up	53.7734	36.517	32.1912	65.6292	80.7563
FBgn0262656	Myc	1.20747	0.00422406	317Grp_Up	76.3512	127.395	90.8241	59.2163	27.9693
FBgn0015519	nAChRalpha3	1.00076	0.00132678	317Grp_Up	157.916	235.873	196.62	122.134	77.0358
FBgn0028875	nAChRalpha5	1.1435	0.00152428	317Grp_Up	290.6	440.837	379.292	225.315	116.954
FBgn0032151	nAChRalpha6	1.42835	6.13678e-06	317Grp_Up	865.1	1399.35	1178.04	560.385	322.631
FBgn0026403	Ndg	-2.99009	2.3997e-15	317Iso_Up	12.8491	4.09536	2.16316	20.4513	24.6865
FBgn0004374	neb	1.01537	0.0421718	317Grp_Up	3.47758	4.72917	4.83864	2.32909	2.01344
FBgn0002930	nec	-1.02623	0.00221534	317Iso_Up	173.877	107.113	135.368	168.652	284.376
FBgn0030425	Nep6	-1.1136	0.0278481	317Iso_Up	21.4819	8.23948	20.55	23.6099	33.5281
FBgn0037230	Nepl11	-1.66148	1.44832e-14	317Iso_Up	149.393	71.2788	81.6876	199.185	245.42
FBgn0039022	Nepl13	-1.40768	0.00959114	317Iso_Up	6.73312	2.53522	5.26558	7.05108	12.0806
FBgn0039609	Nepl17	-1.34698	0.0484985	317Iso_Up	2.25298	0.877578	1.79314	2.83957	3.50163
FBgn0039611	Nepl18	-1.87414	7.54269e-05	317Iso_Up	15.4639	4.43664	9.70574	17.2927	30.4204
FBgn0039612	Nepl19	-1.37358	0.00473784	317Iso_Up	5.82104	3.31529	3.55782	5.77486	10.6362
FBgn0027578	Nepl21	-1.52881	0.000976438	317Iso_Up	32.6131	10.5797	25.2179	36.6592	57.9957
FBgn0031805	Nepl4	-1.13514	0.00184305	317Iso_Up	23.0496	13.7975	16.736	22.9718	38.693
FBgn0263390	Nha2	-1.07575	7.4682e-06	317Iso_Up	22.8326	14.675	16.3944	30.2781	29.9827
FBgn0036101	NijA	-1.01851	0.014214	317Iso_Up	7.26374	4.24163	5.89176	10.9116	8.00998
FBgn0261514	NimA	-2.39818	6.61401e-05	317Iso_Up	2.45891	1.02384	0.683102	4.97723	3.15147
FBgn0260011	NimC4	-2.69404	7.47036e-05	317Iso_Up	2.86254	1.1701	0.512327	6.5725	3.19524
FBgn0002937	ninaB	-1.2375	1.42851e-07	317Iso_Up	127.68	79.7621	81.4884	151.104	198.367
FBgn0002938	ninaC	-1.50595	2.68324e-15	317Iso_Up	4494.97	2655.55	2318.22	6584.78	6421.33
FBgn0002939	ninaD	-2.81882	2.21619e-11	317Iso_Up	4.47299	1.36512	1.05312	8.29538	7.17834
FBgn0037896	ninaG	-1.32716	2.43676e-09	317Iso_Up	75.7303	50.0707	41.4984	109.148	102.204
FBgn0038549	Nnk	1.11844	0.00334354	317Grp_Up	7.95401	12.5786	9.79113	5.20057	4.24572
FBgn0002948	nod	1.03552	0.0060039	317Grp_Up	6.30905	8.19073	9.22188	3.79673	4.02687
FBgn0016919	nompB	1.1996	4.46236e-05	317Grp_Up	22.4846	32.5191	31.7358	15.0912	10.5924
FBgn0027785	NP15.6	-1.13323	0.000123489	317Iso_Up	150.269	112.769	86.327	166.322	235.66
FBgn0027109	NPF	1.62796	1.38977e-14	317Grp_Up	46.535	68.3048	75.1412	20.1961	22.498
FBgn0287423	Nplp2	-1.5939	9.60357e-06	317Iso_Up	711.808	266.101	490.866	823.157	1267.11
FBgn0015776	nrv1	-1.39998	6.24814e-14	317Iso_Up	146.144	86.5389	84.0216	215.648	198.367
FBgn0022774	Oat	-1.23978	2.75189e-05	317Iso_Up	42.5678	25.6935	28.0072	46.5818	69.9888
FBgn0011283	Obp28a	-2.35221	0.00181589	317Iso_Up	3.67486	1.65765	0.939265	2.64814	9.4544
FBgn0033268	Obp44a	-1.4363	1.09706e-05	317Iso_Up	423.87	307.103	177.379	666.055	544.941
FBgn0033573	Obp47a	2.17504	0.0209977	317Grp_Up	0.913443	1.56014	1.48005	0.350959	0.262622
FBgn0034471	Obp56e	-2.11702	1.88989e-12	317Iso_Up	201.043	98.1912	62.5608	371.123	272.295
FBgn0043533	Obp56f	-3.44276	0.0104831	317Iso_Up	0.687771	0.243772	0.0284626	1.69098	0.787866
FBgn0034475	Obp56h	1.81978	8.43338e-10	317Grp_Up	144.464	223.295	235.215	44.4122	74.9348
FBgn0011279	Obp69a	1.57257	0.00442549	317Grp_Up	3.40753	5.75301	4.6394	1.1805	2.05721
FBgn0046878	Obp83cd	-2.99464	0.00103888	317Iso_Up	0.949514	0.195017	0.256163	1.94622	1.40065
FBgn0046875	Obp83g	-1.52665	0.00180464	317Iso_Up	4.59018	2.92526	2.13469	8.13586	5.1649
FBgn0030103	Obp8a	-1.07507	0.00390657	317Iso_Up	10.2723	6.33806	7.62797	11.1031	16.02
FBgn0039678	Obp99a	-9.58025	1.6764e-14	317Iso_Up	146.127	0.731315	0.11385	187.539	396.122
FBgn0039685	Obp99b	-2.6564	7.43692e-14	317Iso_Up	27.3398	8.19073	7.9126	32.0648	61.191
FBgn0039682	Obp99c	-1.53641	2.46024e-06	317Iso_Up	533.605	223.88	359.881	615.9	934.76
FBgn0031097	obst-A	-2.4972	3.72997e-10	317Iso_Up	28.0915	11.116	7.03026	62.3111	31.9086
FBgn0038063	Octbeta2R	1.04166	0.000113558	317Grp_Up	235.053	360.392	289.066	167.407	123.345
FBgn0013307	Odc1	-1.00268	0.0318581	317Iso_Up	21.779	11.0672	19.6107	20.1961	36.2419
FBgn0004646	ogre	-1.06514	7.3093e-07	317Iso_Up	80.5348	54.1173	56.0428	115.465	96.5136
FBgn0035382	Or63a	1.34665	6.48153e-05	317Grp_Up	7.73162	11.8473	10.8727	4.1796	4.02687
FBgn0034935	Orcokinin	2.41244	5.80389e-28	317Grp_Up	153.542	285.164	238.431	41.1579	49.4167
FBgn0037409	Osi24	-1.41097	0.00626331	317Iso_Up	2.88189	1.85266	1.50852	4.05198	4.11441
FBgn0037146	P5CS	-1.07734	0.0164025	317Iso_Up	282.567	133.587	252.264	254.541	489.878
FBgn0005648	Pabp2	1.16322	1.5645e-08	317Grp_Up	58.7181	83.5161	82.9969	35.9254	32.4338
FBgn0027580	PCB	-1.04209	2.42397e-05	317Iso_Up	294.985	185.851	222.35	333.73	438.01
FBgn0023178	Pdf	1.15469	1.17647e-08	317Grp_Up	81.2559	111.16	118.86	45.0184	49.9857
FBgn0011693	Pdh	-1.3763	6.59942e-10	317Iso_Up	1934.17	1282.73	998.012	2765.01	2690.91
FBgn0022770	Peritrophin-A	-1.95923	1.73509e-05	317Iso_Up	9.36749	5.26547	2.96011	18.3456	10.8988
FBgn0031799	Pez	-1.00868	0.000184779	317Iso_Up	14.9365	9.99464	10.9581	19.6218	19.1714
FBgn0004654	Pgd	-1.31623	8.64431e-07	317Iso_Up	111.7	67.476	68.3956	126.217	184.711
FBgn0003076	Pgm1	-1.09324	0.000490297	317Iso_Up	279.374	202.818	174.447	282.745	457.488
FBgn0039780	PH4alphaNE1	1.47137	0.0210466	317Grp_Up	2.39398	2.8765	4.29785	0.95716	1.44442
FBgn0037819	Phyhd1	-1.08218	2.75189e-05	317Iso_Up	61.1257	40.1248	42.8647	68.8517	92.6618
FBgn0024943	PIP82	-1.29753	1.17647e-08	317Iso_Up	437.528	263.078	273.981	523.758	689.296
FBgn0034647	pirk	1.36838	0.000176438	317Grp_Up	9.21569	11.701	15.4552	4.14769	5.55884
FBgn0030670	Pis	-1.1513	3.06771e-10	317Iso_Up	379.879	256.643	242.615	516.547	503.709
FBgn0000442	Pkg21D	-1.44575	5.52537e-06	317Iso_Up	9.25754	5.75301	4.83864	12.8259	13.6126
FBgn0030317	pkm	-1.21264	1.86353e-08	317Iso_Up	603.467	419.628	350.688	777.469	866.084
FBgn0005626	ple	-1.07065	0.00185727	317Iso_Up	87.6718	64.0632	55.4167	147.562	83.6451
FBgn0033572	polyph	1.27308	0.00438273	317Grp_Up	4.87395	6.33806	7.79875	3.12672	2.23229
FBgn0250871	pot	-1.40795	3.6114e-08	317Iso_Up	73.1103	47.0967	37.8552	116.71	90.7797
FBgn0003130	Poxn	1.01967	0.0429028	317Grp_Up	3.57451	5.26547	4.58248	2.3929	2.05721
FBgn0031802	ppk7	-2.60933	0.00784112	317Iso_Up	0.806002	0.195017	0.284626	1.2124	1.53196
FBgn0283437	PPO1	-2.31679	2.56108e-18	317Iso_Up	15.6628	5.16796	6.03407	27.7257	23.7235
FBgn0003141	pr	-1.38444	5.87682e-06	317Iso_Up	74.9059	50.5582	37.4283	126.154	85.4835
FBgn0041194	Prat2	-1.5733	2.44494e-08	317Iso_Up	121.488	60.7966	69.3918	139.362	216.401
FBgn0028573	prc	-1.60733	0.00972397	317Iso_Up	7.67508	6.04554	2.04931	14.0702	8.53522
FBgn0003149	Prm	-2.05809	7.20814e-12	317Iso_Up	568.086	296.426	172.711	881.097	922.11
FBgn0004595	pros	1.3381	4.43554e-06	317Grp_Up	2006.89	3190.87	2691.59	1317.37	827.741
FBgn0033520	Prx2540-1	-1.25336	0.0322742	317Iso_Up	2.49965	1.75516	1.39467	3.82864	3.02015
FBgn0033518	Prx2540-2	-2.04638	2.44494e-08	317Iso_Up	16.558	5.75301	8.02645	33.1496	19.3027
FBgn0030926	psh	-1.06334	0.00315688	317Iso_Up	19.7347	10.2384	16.7645	23.0037	28.9322
FBgn0013323	Ptth	1.66628	0.00799973	317Grp_Up	1.92091	2.82775	3.13088	0.893349	0.831637
FBgn0003162	Pu	-1.38242	2.8517e-06	317Iso_Up	225.138	159.719	104.742	353.639	282.45
FBgn0020385	pug	-1.69304	5.20274e-08	317Iso_Up	119.165	50.8508	69.3349	136.395	220.077
FBgn0003174	pwn	-1.22643	0.000672094	317Iso_Up	7.34065	3.99785	5.29404	10.5288	9.54194
FBgn0002567	Rab32	-1.79278	2.4601e-09	317Iso_Up	294.688	176.393	104.458	443.388	454.511
FBgn0035255	RabX5	-1.46143	0.000121821	317Iso_Up	6.27309	3.75408	3.35859	7.91252	10.0672
FBgn0034728	rad50	1.14426	2.96891e-06	317Grp_Up	20.9917	30.1789	29.1172	12.2835	12.387
FBgn0038946	rdhB	-1.85426	2.48953e-18	317Iso_Up	141.131	71.9126	58.5475	215.999	218.064
FBgn0004244	Rdl	1.10382	0.000634472	317Grp_Up	1309.5	2052.7	1612.23	979.972	593.088
FBgn0033667	reb	-2.02302	0.00366315	317Iso_Up	4.26321	2.48647	1.1385	9.79493	3.63294
FBgn0016715	Reg-2	-1.2015	0.000561895	317Iso_Up	13.7971	6.92311	10.7589	17.197	20.3094
FBgn0034157	resilin	-2.01154	0.0435795	317Iso_Up	0.840908	0.34128	0.370014	0.989065	1.66327
FBgn0014019	Rh5	-1.82616	3.24383e-14	317Iso_Up	220.323	116.279	90.3972	304.058	370.56
FBgn0259216	RhoGAP102A	1.07106	0.00128922	317Grp_Up	39.294	48.8031	60.5684	29.64	18.1647
FBgn0034249	RhoGAP54D	1.22742	0.0175335	317Grp_Up	3.17843	4.19287	4.92403	1.62717	1.96967
FBgn0035574	RhoGEF64C	-1.28849	4.60167e-08	317Iso_Up	36.9994	24.3772	21.2331	54.59	47.7972
FBgn0011705	rost	-1.46733	1.61722e-06	317Iso_Up	12.5231	7.80069	6.37562	19.5899	16.3263
FBgn0029745	Rpn13R	1.32528	0.0157811	317Grp_Up	2.9916	4.72917	4.04169	1.88241	1.31311
FBgn0039788	Rpt6R	-3.5531	0.0458977	317Iso_Up	0.762922	0.243772	0.0284626	2.64814	0.131311
FBgn0087005	rtp	-1.00063	4.48833e-05	317Iso_Up	1299.76	1038.37	790.008	1611.25	1759.39
FBgn0037672	sage	1.21568	4.8394e-05	317Grp_Up	12.7122	18.2341	18.2161	8.00824	6.39047
FBgn0025697	santa-maria	-1.09934	4.84789e-09	317Iso_Up	102.418	68.1098	69.8187	136.012	135.732
FBgn0034276	Sardh	-1.6594	0.00160294	317Iso_Up	3.91944	2.53522	1.50852	4.84961	6.78441
FBgn0003319	Sb	-2.0575	0.00783661	317Iso_Up	1.26025	0.536297	0.512327	2.32909	1.66327
FBgn0033033	scaf	-1.28207	1.24923e-11	317Iso_Up	86.4301	53.6297	53.1966	120.889	118.005
FBgn0261872	scaf6	1.01774	1.81013e-07	317Grp_Up	124.642	171.469	171.373	81.7095	74.0157
FBgn0020908	Scp1	-1.98191	2.61753e-17	317Iso_Up	102.444	40.2711	48.2441	139.745	181.516
FBgn0086348	se	-1.5948	0.000187524	317Iso_Up	63.6425	46.6091	20.55	107.968	79.4432
FBgn0263006	SERCA	-2.08058	1.5572e-15	317Iso_Up	1984.86	963.873	656.518	2928.84	3390.19
FBgn0260653	serp	-2.13085	0.0128256	317Iso_Up	77.0911	37.9309	23.1401	173.278	74.0157
FBgn0003360	sesB	-1.0427	7.36553e-07	317Iso_Up	3789.97	2851.2	2381.49	4902.92	5024.27
FBgn0025571	SF1	1.02347	1.64312e-07	317Grp_Up	194.616	261.177	274.863	114.572	127.853
FBgn0003380	Sh	1.04838	0.0044157	317Grp_Up	1966.95	3041.93	2398.49	1587.74	839.647
FBgn0029823	Shmt	-1.08471	0.000179143	317Iso_Up	142.133	90.2442	102.636	148.966	226.687
FBgn0003411	sisA	-6.98732	0.00367995	317Iso_Up	0.400987	0	0	0.159527	1.44442
FBgn0026176	SkpB	-2.54697	9.53166e-05	317Iso_Up	3.12307	1.36512	0.626177	3.54149	6.95949
FBgn0032901	sky	1.30105	0.000636561	317Grp_Up	15.1034	26.8636	17.1345	9.41207	7.00326
FBgn0037203	slif	-1.64692	2.22523e-06	317Iso_Up	8.41773	3.85159	4.81018	14.1979	10.8113
FBgn0003429	slo	1.06622	0.000101312	317Grp_Up	636.709	889.425	879.608	469.614	308.187
FBgn0035539	slow	-1.60944	0.000105044	317Iso_Up	14.9322	6.63059	9.0511	29.0338	15.0132
FBgn0037263	slx1	1.778	0.0262579	317Grp_Up	1.33768	1.65765	2.56163	0.606201	0.525244
FBgn0038257	smp-30	-2.22869	3.48237e-15	317Iso_Up	51.0985	15.2113	23.2824	73.0632	92.8369
FBgn0033917	SmydA-1	-1.14539	0.000532002	317Iso_Up	8.44692	5.94803	5.20865	11.2945	11.3365
FBgn0262599	SmydA-3	-1.0396	0.00510211	317Iso_Up	9.10836	6.48432	6.11946	9.95446	13.8752
FBgn0030102	SmydA-9	-1.10887	0.000127671	317Iso_Up	37.298	29.3989	20.6069	50.2509	48.9353
FBgn0037338	Snm1	1.08493	0.00775801	317Grp_Up	6.04868	7.16688	9.70574	3.73292	3.58917
FBgn0065099	snRNA:7SKa	1.22561	0.0414888	317Grp_Up	3.09362	5.50924	3.38705	1.94622	1.53196
FBgn0031646	snsl	-1.33845	0.00484443	317Iso_Up	4.61324	3.36405	2.22008	7.1787	5.69015
FBgn0039594	snu	-1.04186	1.41854e-06	317Iso_Up	115.923	71.2301	89.1164	150.848	152.496
FBgn0024289	Sodh-1	-2.69874	7.95157e-20	317Iso_Up	109.14	27.2049	35.5213	142.202	231.633
FBgn0034903	sona	-1.53549	0.000132771	317Iso_Up	14.2055	8.48325	7.03026	26.8643	14.4442
FBgn0039102	SPE	-1.03522	0.000646037	317Iso_Up	121.388	73.3752	95.1789	127.079	189.92
FBgn0032638	SPH93	-6.80814	0.00185727	317Iso_Up	4.30385	0.0487543	0.11385	0.989065	16.0637
FBgn0038299	Spn88Eb	-1.54371	0.00731434	317Iso_Up	11.5035	5.70426	6.80256	8.29538	25.2117
FBgn0031959	spz3	-1.28831	0.0155571	317Iso_Up	7.15593	5.80176	3.0455	12.3793	7.39719
FBgn0036945	Ssk	-1.11807	7.88389e-08	317Iso_Up	63.9004	40.1736	45.1417	89.3987	80.8876
FBgn0052667	ssp7	-2.15428	5.9022e-09	317Iso_Up	35.5465	11.9448	15.996	38.8288	75.4163
FBgn0010278	Ssrp	1.15852	4.71034e-05	317Grp_Up	42.1042	69.6699	49.5534	24.3757	24.8178
FBgn0003515	st	-1.4334	1.2146e-06	317Iso_Up	10.0102	5.89927	5.60713	14.1341	14.4004
FBgn0286203	stw	-1.6029	0.000977137	317Iso_Up	17.5976	11.4573	7.08718	35.9573	15.8886
FBgn0086450	su(r)	-1.30709	1.71317e-06	317Iso_Up	48.0254	26.2786	32.3904	56.4405	76.9921
FBgn0028563	sut1	-1.10513	0.0068162	317Iso_Up	7.08755	4.63166	4.89556	11.2945	7.5285
FBgn0034709	Swim	-1.85147	4.05264e-08	317Iso_Up	115.955	69.6212	37.4852	192.006	164.708
FBgn0086367	t	-1.44068	6.95886e-14	317Iso_Up	516.065	275.121	315.735	694.994	778.412
FBgn0023477	Taldo	-1.28181	6.09366e-08	317Iso_Up	186.814	119.448	111.488	222.795	293.524
FBgn0036899	tey	1.02456	3.9691e-05	317Grp_Up	21.5746	27.985	31.4512	13.6874	13.1749
FBgn0035199	tfc	-1.71385	3.10597e-05	317Iso_Up	13.1252	8.72702	4.38324	19.7813	19.6091
FBgn0037487	thw	-1.86802	0.000101312	317Iso_Up	3.86822	2.19394	1.39467	6.41297	5.47129
FBgn0003721	Tm1	-1.1017	0.000105689	317Iso_Up	638.057	512.164	344.653	795.623	899.787
FBgn0004117	Tm2	-1.34765	1.5555e-07	317Iso_Up	517.663	362.196	256.704	696.015	755.739
FBgn0082582	tmod	-1.01127	0.0182229	317Iso_Up	304.959	240.846	185.576	545.102	248.309
FBgn0261575	tobi	-4.31508	5.60131e-07	317Iso_Up	38.9327	3.70533	4.38324	37.2973	110.345
FBgn0037751	topi	-1.41017	0.000341372	317Iso_Up	5.47583	3.12028	3.24473	8.71015	6.82818
FBgn0035719	tow	1.08767	7.87538e-07	317Grp_Up	217.199	324.85	281.324	141.947	120.675
FBgn0031692	TpnC25D	-1.05349	0.000973597	317Iso_Up	477.814	409.585	245.945	619.569	636.158
FBgn0013348	TpnC41C	-1.37769	8.15593e-06	317Iso_Up	43.9816	31.4465	20.4361	57.2062	66.8373
FBgn0027560	Tps1	-1.14204	0.00179294	317Iso_Up	301.311	166.447	232.34	285.457	520.999
FBgn0038343	Trissin	1.11062	4.58175e-07	317Grp_Up	39.8284	56.555	55.1605	22.7804	24.8178
FBgn0003867	tsl	-1.29248	3.77201e-07	317Iso_Up	40.1163	22.3782	26.9541	49.198	61.9351
FBgn0031850	Tsp	-1.69493	3.74254e-13	317Iso_Up	91.223	50.6557	41.0715	125.484	147.681
FBgn0033132	Tsp42Ej	-1.1892	3.13961e-06	317Iso_Up	566.504	405.343	325.84	668.704	866.128
FBgn0029837	Tsp5D	-1.08211	0.00432009	317Iso_Up	35.9772	29.9352	18.8422	57.27	37.8614
FBgn0052364	tut	2.15069	0.039032	317Grp_Up	0.947778	1.02384	2.10623	0.223337	0.437704
FBgn0086368	tw	-1.23883	0.022739	317Iso_Up	3.75397	1.65765	3.0455	4.75389	5.55884
FBgn0037225	TwdlG	1.46254	3.29426e-08	317Grp_Up	23.1551	32.0803	37.3998	12.9855	10.1547
FBgn0035978	UGP	-1.43213	2.15464e-11	317Iso_Up	161.058	89.4642	95.6627	205.151	253.956
FBgn0032684	Ugt301D1	-1.92181	2.43676e-09	317Iso_Up	17.548	9.55585	6.14792	28.97	25.5181
FBgn0040256	Ugt35C1	-1.26132	1.89436e-08	317Iso_Up	30.941	17.9416	20.6638	42.6574	42.501
FBgn0032713	Ugt36D1	-1.08433	6.97116e-06	317Iso_Up	37.545	27.1562	23.7663	46.6456	52.612
FBgn0038083	Ugt37A3	-7.53016	0.000284467	317Iso_Up	0.584244	0	0	0.54239	1.79458
FBgn0045800	Uhg1	1.33623	0.000519044	317Grp_Up	11.7945	16.7715	17.846	8.00824	4.55212
FBgn0259936	Uhg3	1.11142	0.0153147	317Grp_Up	4.84541	6.7281	6.88795	3.44577	2.31983
FBgn0083124	Uhg4	1.64519	2.52557e-06	317Grp_Up	17.8831	21.2081	34.0697	7.01917	9.23555
FBgn0083123	Uhg5	1.87753	3.80402e-09	317Grp_Up	20.6837	33.3967	32.8174	10.3054	6.21539
FBgn0031879	uif	-1.06865	1.6863e-05	317Iso_Up	42.9136	28.6675	29.9426	63.7149	49.3292
FBgn0086691	UK114	-1.56353	2.81009e-10	317Iso_Up	28.8612	16.3815	14.6867	38.2864	46.0902
FBgn0053519	Unc-89	-1.2187	5.54261e-11	317Iso_Up	154.249	98.825	97.6551	204.641	215.875
FBgn0263352	Unr	1.17686	6.29876e-06	317Grp_Up	1595.31	2204.82	2330.46	1103.38	742.564
FBgn0004169	up	-1.37012	1.06533e-05	317Iso_Up	832.022	600.409	383.22	1011.78	1332.68
FBgn0030262	Vago	-1.03666	0.00896261	317Iso_Up	19.0824	11.2135	15.2275	18.5051	31.3833
FBgn0050101	Vajk4	-1.7833	0.000207812	317Iso_Up	17.2108	11.8961	4.6394	23.7695	28.5383
FBgn0262524	ver	1.42471	0.0016461	317Grp_Up	4.14288	5.46048	6.88795	2.29718	1.9259
FBgn0261341	verm	-2.20019	0.0121065	317Iso_Up	91.412	43.6351	26.0148	208.501	87.4969
FBgn0016075	vkg	-1.08772	1.68626e-07	317Iso_Up	158.363	111.452	102.921	196.026	223.054
FBgn0003996	w	-1.65705	1.84007e-08	317Iso_Up	27.2715	16.674	11.3281	42.785	38.2991
FBgn0260780	wisp	2.06551	1.34062e-05	317Grp_Up	3.63666	6.53308	5.40789	1.46764	1.13803
FBgn0041087	wun2	-1.27367	0.00511671	317Iso_Up	6.859	5.36297	3.18781	10.6564	8.22883
FBgn0283471	wupA	-1.24883	8.12608e-09	317Iso_Up	444.173	307.152	249.987	631.981	587.573
FBgn0041711	yellow-e	-2.07473	1.15622e-11	317Iso_Up	18.0862	6.09429	8.70955	32.7668	24.774
FBgn0038105	yellow-f2	-1.21878	0.000319376	317Iso_Up	17.987	9.16581	13.719	21.3128	27.7504
FBgn0004045	Yp1	-9.29269	1.55019e-23	317Iso_Up	4190.46	21.5007	7.37181	5557.56	11175.4
FBgn0005391	Yp2	-9.73727	4.79939e-26	317Iso_Up	2753.94	10.4334	3.52936	3701.24	7300.55
FBgn0004047	Yp3	-6.7663	2.38455e-96	317Iso_Up	2922.29	62.113	53.595	3771.97	7801.5
FBgn0035917	Zasp66	-1.08988	6.04838e-07	317Iso_Up	283.14	200.185	182.701	340.334	409.34
FBgn0259789	zld	1.47329	8.6078e-09	317Grp_Up	45.7154	71.9126	65.4639	26.2262	19.259
FBgn0051860	ZnT33D	2.12392	0.0490314	317Grp_Up	0.765587	1.1701	1.3662	0.350959	0.175081
FBgn0037000	ZnT77C	-1.56917	0.00324488	317Iso_Up	3.91732	1.46263	2.70395	4.84961	6.65309
FBgn0004057	Zw	-1.24969	3.72165e-06	317Iso_Up	46.3204	27.6437	30.5119	53.1543	73.9719
FBgn0036985	zye	-1.36136	0.011495	317Iso_Up	2.85961	1.85266	1.56544	4.56246	3.45786

## Sheet: DGRP707_GrpVSIso
ID	GeneSymbol	log2FC	padj	Remark	Avg.norm.exp	707Grp_1	707Grp_2	707Iso_1	707Iso_2
FBgn0085813	18SrRNA-Psi:CR41602	-5.37643	0.0353301	707Iso_Up	8.4162	0.268265	0.594431	0.370431	32.4317
FBgn0085771	28SrRNA-Psi:CR40741	-3.81383	0.00526584	707Iso_Up	1.27517	0.160959	0.198144	0.123477	4.6181
FBgn0267508	28SrRNA-Psi:CR45848	-4.97209	0.0245718	707Iso_Up	0.502039	0.0268265	0.0396287	0	1.9417
FBgn0267519	28SrRNA-Psi:CR45859	-5.8535	0.0265277	707Iso_Up	6.0383	0.268265	0.158515	0.216085	23.5103
FBgn0267520	28SrRNA-Psi:CR45860	-7.08099	0.0062185	707Iso_Up	10.5193	0.134132	0.198144	0.339561	41.4055
FBgn0023129	aay	-2.16197	9.50132e-20	707Iso_Up	240.082	103.765	85.5584	412.629	358.375
FBgn0029969	Acat1	-1.73446	2.28048e-08	707Iso_Up	54.241	21.4612	33.6052	98.5037	63.3939
FBgn0010387	Acbp2	-1.61591	3.82773e-11	707Iso_Up	58.2864	25.0023	37.568	92.3298	78.2453
FBgn0033246	ACC	-1.24782	3.42056e-05	707Iso_Up	322.241	176.142	238.327	538.946	335.547
FBgn0016122	Acer	-2.59576	2.12648e-24	707Iso_Up	97.8009	23.8219	37.6869	184.907	144.788
FBgn0027572	ACOX1	-1.0368	3.37453e-05	707Iso_Up	75.6524	45.7659	61.1471	109.37	86.327
FBgn0034629	Acox57D-d	-2.8024	6.87848e-12	707Iso_Up	4.65818	1.12671	1.46626	9.32251	6.71724
FBgn0034628	Acox57D-p	-2.04642	6.40084e-10	707Iso_Up	20.5443	7.35045	10.3035	40.0683	24.4549
FBgn0014454	Acp1	3.47099	0.000280711	707Grp_Up	23.1969	18.0005	68.0821	3.76605	2.93879
FBgn0031703	Acsf2	-1.00215	5.37149e-05	707Iso_Up	30.2917	19.1541	24.2528	42.0748	35.6853
FBgn0263120	Acsl	-1.2602	1.56726e-05	707Iso_Up	312.649	204.176	191.882	517.152	337.384
FBgn0000047	Act88F	1.12992	0.00984463	707Grp_Up	34.0716	25.8607	71.2524	16.0829	23.0905
FBgn0040507	ACXD	-1.20596	0.014735	707Iso_Up	3.28383	1.50228	2.81364	4.04387	4.77554
FBgn0038172	Adgf-D	-2.14584	9.6927e-11	707Iso_Up	41.9963	16.9543	16.8818	86.3412	47.8079
FBgn0000055	Adh	-1.40581	8.85436e-05	707Iso_Up	5.00086	2.65582	3.24955	6.69862	7.39946
FBgn0052068	Adi1	-1.81814	2.84876e-10	707Iso_Up	33.8477	14.7545	17.9122	61.7384	40.9857
FBgn0038984	AdipoR	-1.49266	2.58512e-09	707Iso_Up	239.927	137.486	133.826	396.67	291.728
FBgn0036337	Adk2	-1.54885	4.90551e-09	707Iso_Up	70.6613	37.5839	40.3817	120.452	84.2279
FBgn0036622	Agpat4	-2.31775	9.4177e-10	707Iso_Up	7.57665	2.03881	3.60621	14.3233	10.3383
FBgn0014031	Agxt	-3.72173	1.20984e-30	707Iso_Up	73.6686	8.8259	14.5437	171.911	99.3942
FBgn0014455	Ahcy	-1.76848	9.6469e-09	707Iso_Up	75.5982	26.9338	48.6244	132.583	94.2513
FBgn0015011	AhcyL2	-1.21746	3.52583e-07	707Iso_Up	18.7103	10.6233	13.6323	25.3436	25.2421
FBgn0025595	AkhR	-2.49545	7.5827e-25	707Iso_Up	29.6308	8.36985	11.2942	53.9903	44.8691
FBgn0086254	Akr1B	-1.34828	1.45061e-07	707Iso_Up	136.739	73.3972	93.7615	220.838	158.957
FBgn0012036	Aldh	-1.72472	5.06211e-14	707Iso_Up	476.892	212.009	270.426	806.675	618.458
FBgn0036857	Aldh7A1	-1.51774	3.43858e-05	707Iso_Up	50.0522	24.1706	32.4955	95.2624	48.2802
FBgn0015568	alpha-Est1	-1.75629	3.46148e-10	707Iso_Up	43.9361	17.8932	26.0757	76.9878	54.7875
FBgn0015569	alpha-Est10	-1.56167	3.05371e-06	707Iso_Up	12.987	6.43835	7.88611	22.7197	14.9039
FBgn0015570	alpha-Est2	-1.88557	1.3345e-06	707Iso_Up	13.9212	6.17008	6.81614	28.2145	14.484
FBgn0261393	alpha-Est5	-2.10206	0.000483031	707Iso_Up	3.65279	0.938926	2.17958	7.87165	3.62101
FBgn0015575	alpha-Est7	-2.11165	1.21379e-12	707Iso_Up	144.055	49.7631	69.4691	284.491	172.497
FBgn0015576	alpha-Est8	-1.41939	5.89168e-09	707Iso_Up	61.0808	35.3036	36.3792	97.1763	75.464
FBgn0003886	alphaTub85E	-1.42528	0.00455269	707Iso_Up	2.63248	1.66324	1.38701	3.85865	3.62101
FBgn0039332	alrm	-1.17929	0.000191616	707Iso_Up	52.6454	39.6763	29.0479	80.3526	61.5047
FBgn0000078	Amy-d	-4.48946	4.1736e-07	707Iso_Up	90.8028	6.14326	11.532	255.535	90.0005
FBgn0000079	Amy-p	-4.22996	9.41085e-27	707Iso_Up	62.7076	5.5799	8.79758	166.972	69.4814
FBgn0020506	Amyrel	-5.95586	0.0170508	707Iso_Up	0.16901	0	0	0.308692	0.367349
FBgn0012037	Ance	-1.03297	4.94869e-05	707Iso_Up	27.2066	15.7471	22.7865	36.5492	33.7436
FBgn0033366	Ance-4	-4.14048	1.50418e-29	707Iso_Up	32.9012	3.88984	3.96287	83.5013	40.251
FBgn0035076	Ance-5	-2.64612	2.90982e-24	707Iso_Up	41.9205	11.1062	14.3852	82.5752	59.6155
FBgn0026268	Antdh	-1.78195	5.44189e-08	707Iso_Up	39.5747	12.6889	26.6701	64.8871	54.0528
FBgn0267408	AOX1	-1.29253	2.3363e-06	707Iso_Up	137.525	67.6027	105.809	215.004	161.686
FBgn0087002	apolpp	-2.71927	1.27572e-21	707Iso_Up	1173.88	329.563	351.309	2517.11	1497.52
FBgn0032136	Apoltp	-2.63849	1.85723e-27	707Iso_Up	165.317	43.1906	57.7787	323.726	236.573
FBgn0000109	Aprt	-1.02216	0.00310863	707Iso_Up	7.90815	4.77511	6.49911	11.1747	9.18373
FBgn0033926	Arc1	1.02873	0.000110432	707Grp_Up	178.658	194.009	302.05	89.0577	129.517
FBgn0038742	Arc42	-1.37171	1.08207e-06	707Iso_Up	34.2098	15.8813	25.6794	52.5086	42.7699
FBgn0023535	arg	-1.52746	0.00103397	707Iso_Up	4.40221	1.63641	3.36844	6.88384	5.72015
FBgn0032076	Argl	-3.941	2.7525e-26	707Iso_Up	54.3661	6.17008	8.79758	139.313	63.184
FBgn0270926	AsnS	-1.26582	1.79373e-05	707Iso_Up	58.4085	38.2813	35.4677	95.2316	64.6534
FBgn0017424	asRNA:CR11538	-8.39449	3.67058e-06	707Iso_Up	0.889809	0	0	2.56215	0.99709
FBgn0263766	asRNA:CR43683	-1.68268	0.00678359	707Iso_Up	1.70492	0.885273	0.871832	2.96345	2.09914
FBgn0264267	asRNA:CR43767	-3.38458	0.0488787	707Iso_Up	0.321631	0.107306	0	0.339561	0.839655
FBgn0264822	asRNA:CR44030	-6.40767	0.000459883	707Iso_Up	0.627954	0.0268265	0	1.17303	1.31196
FBgn0264874	asRNA:CR44065	-2.8527	5.28303e-09	707Iso_Up	3.22151	0.885273	0.832203	6.76036	4.40819
FBgn0265499	asRNA:CR44368	-1.32998	0.0304614	707Iso_Up	1.70809	0.965752	1.1096	1.97563	2.78136
FBgn0266406	asRNA:CR45046	-4.66908	0.000198069	707Iso_Up	6.37793	0.134132	0.990718	11.2673	13.1196
FBgn0266637	asRNA:CR45144	-3.89978	0.0274319	707Iso_Up	0.332785	0.0536529	0.0396287	1.08042	0.157435
FBgn0267161	asRNA:CR45601	-5.14267	1.72288e-30	707Iso_Up	6.81656	0.214612	0.673688	13.5207	12.8572
FBgn0267189	asRNA:CR45629	-4.9412	0.0276317	707Iso_Up	0.238341	0	0.0396287	0.493908	0.419827
FBgn0267693	asRNA:CR46029	1.35979	0.0201912	707Grp_Up	2.2154	2.76312	3.76473	0.864338	1.4694
FBgn0267762	asRNA:CR46093	-2.29672	1.13111e-09	707Iso_Up	4.90044	1.95833	1.58515	7.34688	8.71142
FBgn0267914	asRNA:CR46195	-2.34109	0.00170729	707Iso_Up	2.90816	0.348744	1.86255	5.95776	3.46358
FBgn0026565	Ass	-4.32388	3.64151e-22	707Iso_Up	8.71074	0.670661	1.22849	21.6085	11.3353
FBgn0032422	atilla	-1.03503	2.20253e-06	707Iso_Up	116.089	66.154	97.6055	141.011	159.587
FBgn0036995	atk	-4.36868	1.31524e-05	707Iso_Up	13.402	0.83162	2.02106	37.3209	13.4345
FBgn0034724	babos	-1.44822	5.71589e-11	707Iso_Up	55.234	26.6387	37.6473	81.1861	75.464
FBgn0033778	Balat	-1.95418	0.00146868	707Iso_Up	1.92639	1.07306	0.594431	2.99431	3.04375
FBgn0034512	Bbd	-1.80719	1.04978e-09	707Iso_Up	441.283	184.7	244.826	835.383	500.224
FBgn0037215	beta-Man	-1.26834	1.74597e-07	707Iso_Up	49.0586	25.6729	36.6962	72.2031	61.6622
FBgn0027348	bgm	-3.8935	2.05384e-40	707Iso_Up	105.873	13.6278	16.0893	247.726	146.047
FBgn0085385	bma	1.05336	1.47624e-05	707Grp_Up	87.7135	126.728	116.746	45.1925	62.1869
FBgn0036449	bmm	-1.21371	5.08739e-06	707Iso_Up	71.8314	45.2831	47.9111	113.105	81.0267
FBgn0029730	boil	2.20523	0.00210299	707Grp_Up	1.36047	2.2266	2.29847	0.339561	0.577263
FBgn0034328	BomBc1	-2.34013	2.7529e-15	707Iso_Up	64.6024	22.9903	23.6583	131.626	80.1346
FBgn0034331	BomBc2	-3.22041	9.77373e-22	707Iso_Up	96.4694	12.8767	29.2856	199.137	144.578
FBgn0040582	BomBc3	-1.76988	1.43964e-08	707Iso_Up	63.106	22.4269	40.6194	110.975	78.4028
FBgn0034329	BomS1	-2.03545	2.84916e-12	707Iso_Up	92.4671	35.1427	44.4238	179.782	110.52
FBgn0025583	BomS2	-2.66688	1.61325e-20	707Iso_Up	162.22	36.9132	61.266	328.14	222.561
FBgn0040736	BomS3	-1.8729	2.58512e-09	707Iso_Up	68.4712	24.8413	39.8665	128.57	80.6069
FBgn0034330	BomS4	-2.37115	8.74086e-24	707Iso_Up	16.7196	5.17751	6.65762	26.0228	29.0206
FBgn0040733	BomS6	-3.11471	0.0066772	707Iso_Up	15.4081	1.18036	6.06319	23.0593	31.3296
FBgn0262838	BomT1	-2.75275	7.13989e-07	707Iso_Up	2.26119	0.482876	0.832203	4.47604	3.25366
FBgn0040735	BomT2	-3.07426	4.59779e-13	707Iso_Up	10.4855	1.26084	3.80436	19.1389	17.7377
FBgn0038930	BomT3	-1.68524	3.47394e-06	707Iso_Up	109.831	59.7962	53.1817	217.505	108.84
FBgn0261284	bou	-1.3826	8.13833e-06	707Iso_Up	7.62829	4.45319	4.63656	10.9277	10.4957
FBgn0040333	brv3	1.20925	0.00760316	707Grp_Up	4.38415	4.58732	8.08426	2.34606	2.51896
FBgn0029848	Btnd	-3.84942	0.0125087	707Iso_Up	0.459114	0.0804794	0.0396287	0.246954	1.4694
FBgn0263111	cac	1.01689	2.60352e-05	707Grp_Up	275.574	403.255	355.628	146.042	197.371
FBgn0039486	CAH9	-1.68467	1.42868e-06	707Iso_Up	5.14437	2.46803	2.81364	7.68644	7.60937
FBgn0037646	CAHbeta	-1.27435	0.000808763	707Iso_Up	9.67225	6.00913	6.22171	16.3298	10.1283
FBgn0000261	Cat	-1.43663	5.5704e-09	707Iso_Up	214.092	94.9656	156.533	317.706	287.162
FBgn0050106	CCHa1-R	1.04416	0.00625368	707Grp_Up	5.95297	7.94063	8.67869	4.04387	3.14871
FBgn0038147	CCHa2	-2.51863	2.42989e-13	707Iso_Up	58.8781	20.254	18.0311	129.373	67.8546
FBgn0004783	Ccp84Aa	6.59824	0.00196486	707Grp_Up	0.414123	0.348744	1.30775	0	0
FBgn0004782	Ccp84Ab	4.92825	0.0269992	707Grp_Up	2.38827	2.17294	7.13317	0.246954	0
FBgn0038865	cDIP	-1.84872	4.75534e-07	707Iso_Up	11.9431	4.48002	6.97465	22.4111	13.9068
FBgn0016131	Cdk4	-1.01251	0.00057451	707Iso_Up	9.61194	6.03595	7.64834	12.3786	12.3849
FBgn0000278	CecB	4.06404	0.0403697	707Grp_Up	0.336436	1.04623	0.237772	0.0617384	0
FBgn0000279	CecC	2.58649	0.00464071	707Grp_Up	1.48327	4.02397	1.1096	0.432169	0.367349
FBgn0034443	cer	-1.12794	2.39308e-05	707Iso_Up	22.1186	13.0645	16.9215	32.1966	26.2917
FBgn0039207	Cftr	-1.54852	9.88347e-10	707Iso_Up	29.6391	15.7471	16.9215	48.156	37.732
FBgn0032785	CG10026	-1.49978	1.3713e-06	707Iso_Up	13.4695	6.25056	9.11461	21.8245	16.6881
FBgn0031563	CG10031	-2.78085	4.53623e-15	707Iso_Up	19.2234	4.29223	6.618	42.1056	23.8777
FBgn0034439	CG10062	-1.31371	0.00599628	707Iso_Up	2.91156	1.52911	2.10032	4.29082	3.72597
FBgn0034440	CG10073	-4.5033	2.89596e-08	707Iso_Up	1.73701	0.107306	0.237772	4.66125	1.9417
FBgn0032801	CG10165	-1.70841	0.000251476	707Iso_Up	6.6899	2.25342	4.71582	12.286	7.50442
FBgn0039094	CG10184	-1.40237	3.71308e-07	707Iso_Up	19.6631	11.0525	12.2849	31.3323	23.9826
FBgn0039118	CG10208	-1.47559	4.55921e-05	707Iso_Up	13.7592	6.27739	9.66941	23.9236	15.1663
FBgn0032783	CG10237	-1.64871	3.6683e-12	707Iso_Up	95.4018	39.0057	61.7019	146.66	134.24
FBgn0027562	CG10345	-2.06946	2.95758e-13	707Iso_Up	24.9554	7.45775	13.7115	38.9261	39.7262
FBgn0030348	CG10352	-1.66829	7.23969e-07	707Iso_Up	7.64194	3.78253	4.16102	12.8107	9.81347
FBgn0032699	CG10383	-1.33676	8.95977e-10	707Iso_Up	52.6189	28.4629	36.0621	77.7287	68.222
FBgn0034638	CG10433	-1.03911	2.2097e-07	707Iso_Up	359.439	225.664	279.937	492.858	439.297
FBgn0037057	CG10512	-1.35216	1.82597e-06	707Iso_Up	42.2966	24.2779	27.2249	69.9805	47.7029
FBgn0036549	CG10516	-1.63083	1.61534e-06	707Iso_Up	20.991	9.44291	12.9982	38.4322	23.0905
FBgn0039321	CG10550	-1.04929	8.4708e-08	707Iso_Up	175.602	115.837	129.388	239.082	218.1
FBgn0039324	CG10553	-2.79609	7.42851e-25	707Iso_Up	35.1358	8.96004	10.5412	71.5549	49.4872
FBgn0039325	CG10560	-2.45757	2.94462e-08	707Iso_Up	3.84615	1.28767	1.30775	7.59383	5.19536
FBgn0039326	CG10562	-1.4165	1.68576e-05	707Iso_Up	14.502	8.10159	9.03535	24.6028	16.2683
FBgn0032726	CG10621	-4.02836	1.66696e-27	707Iso_Up	32.1631	4.13127	4.12139	81.6182	38.7816
FBgn0036287	CG10663	-1.26995	0.00974983	707Iso_Up	2.8028	1.85103	1.66441	4.07474	3.62101
FBgn0032836	CG10680	-3.0037	4.60052e-20	707Iso_Up	64.9797	12.1256	20.1314	144.221	83.4407
FBgn0033821	CG10799	-3.51599	4.58959e-34	707Iso_Up	37.4226	4.98972	8.52017	78.1917	57.9887
FBgn0033830	CG10814	-6.57624	0.0170508	707Iso_Up	1.60497	0	0.0792574	0.463038	5.87758
FBgn0027552	CG10863	-1.03269	5.4288e-06	707Iso_Up	181.541	113.664	142.822	258.715	210.963
FBgn0037228	CG1092	-2.24558	5.44667e-17	707Iso_Up	16.7579	6.67979	5.94431	28.9553	25.452
FBgn0030073	CG10962	-3.50967	6.16251e-10	707Iso_Up	4.17202	0.482876	1.06998	10.4647	4.67058
FBgn0031741	CG11034	-1.16734	0.0170038	707Iso_Up	4.18826	2.11929	3.52696	6.69862	4.40819
FBgn0039241	CG11089	-2.97356	7.04818e-05	707Iso_Up	137.409	35.7328	32.7333	340.055	141.115
FBgn0030518	CG11134	-1.32408	2.969e-05	707Iso_Up	11.1576	5.9823	7.84649	17.472	13.3295
FBgn0031734	CG11147	-1.5243	1.98137e-09	707Iso_Up	64.0774	34.4452	37.0925	106.684	78.0879
FBgn0037195	CG11226	-4.13798	0.0234448	707Iso_Up	0.270514	0.0268265	0.0396287	0.648254	0.367349
FBgn0037070	CG11309	-1.38333	9.27628e-07	707Iso_Up	47.3941	26.2363	30.6726	79.087	53.5805
FBgn0035557	CG11353	-2.02393	0.00390919	707Iso_Up	1.48261	0.643835	0.594431	1.54346	3.14871
FBgn0034198	CG11400	-2.93216	4.85375e-27	707Iso_Up	29.0337	6.25056	8.67869	58.4354	42.7699
FBgn0035022	CG11413	3.89055	0.00512464	707Grp_Up	17.0998	7.56506	57.105	1.94476	1.78427
FBgn0037167	CG11425	-2.48301	2.00845e-26	707Iso_Up	20.1403	5.84817	7.56909	34.4501	32.6941
FBgn0037166	CG11426	-6.89082	0	707Iso_Up	1001.07	16.23	20.924	1845.02	2122.12
FBgn0035359	CG1143	-1.18334	1.73351e-06	707Iso_Up	16.2792	9.25513	12.166	20.8676	22.8281
FBgn0037165	CG11437	-2.51423	0.0330105	707Iso_Up	0.486572	0.160959	0.158515	1.04955	0.577263
FBgn0037164	CG11438	-2.1463	4.51888e-11	707Iso_Up	9.20917	2.70947	4.79507	14.8481	14.484
FBgn0037162	CG11449	-7.62428	9.64268e-05	707Iso_Up	0.551022	0	0	0.524777	1.67931
FBgn0040637	CG11458	1.12963	0.0392018	707Grp_Up	6.97643	5.12385	14.8608	4.35256	3.56853
FBgn0037396	CG11459	-4.16724	2.9516e-15	707Iso_Up	3.08691	0.268265	0.475545	6.51341	5.09041
FBgn0036264	CG11529	-2.578	1.21113e-05	707Iso_Up	2.16418	0.402397	0.990718	3.11779	4.1458
FBgn0035484	CG11594	-1.93491	1.25028e-10	707Iso_Up	81.8329	32.2722	42.165	157.803	95.0909
FBgn0030638	CG11655	-1.03921	0.000521264	707Iso_Up	19.8505	10.7038	17.4366	27.2267	24.0351
FBgn0040531	CG11741	-2.63521	5.25015e-05	707Iso_Up	1.66712	0.348744	0.673688	2.12998	3.51606
FBgn0039628	CG11841	-2.39569	7.92515e-17	707Iso_Up	70.1573	17.9469	31.7822	131.873	99.0268
FBgn0039629	CG11842	-2.65769	3.06048e-13	707Iso_Up	17.017	4.61415	5.70654	37.7531	19.9943
FBgn0039630	CG11843	-2.69347	4.29018e-06	707Iso_Up	1.97458	0.643835	0.475545	2.68562	4.09332
FBgn0039299	CG11854	-1.98251	0.0241342	707Iso_Up	0.844357	0.241438	0.515173	1.2039	1.41692
FBgn0039313	CG11892	-2.40902	9.10493e-05	707Iso_Up	1.81607	0.777967	0.435916	2.90171	3.14871
FBgn0014427	CG11899	-2.39904	1.25096e-14	707Iso_Up	63.165	19.5833	24.8472	132.398	75.8313
FBgn0039656	CG11951	-1.79617	4.20184e-11	707Iso_Up	20.1731	8.20889	11.532	33.9253	27.0264
FBgn0037386	CG1208	-1.17883	0.000140287	707Iso_Up	8.76557	5.41894	6.14245	12.5329	10.968
FBgn0035241	CG12105	-1.42555	0.000431659	707Iso_Up	4.82387	2.89726	2.65512	5.55646	8.18664
FBgn0030041	CG12116	-3.41402	1.12146e-31	707Iso_Up	179.287	22.6952	46.3656	352.897	295.191
FBgn0037387	CG1213	-1.61327	8.44606e-16	707Iso_Up	161.654	76.1603	96.6544	251.553	222.246
FBgn0037974	CG12224	-1.97637	1.90637e-08	707Iso_Up	12.0391	4.13127	6.65762	22.4111	14.9564
FBgn0039131	CG12268	-1.81199	6.96573e-07	707Iso_Up	9.59043	3.13869	6.26134	15.5272	13.4345
FBgn0033558	CG12344	-1.31442	0.000642286	707Iso_Up	8.29235	5.36529	4.87433	13.7985	9.13125
FBgn0031974	CG12560	-1.17132	0.0023357	707Iso_Up	6.48837	4.64098	3.88361	9.66207	7.76681
FBgn0035476	CG12766	-2.17796	0.00250272	707Iso_Up	1.41866	0.402397	0.752946	2.83997	1.67931
FBgn0037779	CG12811	-1.98814	3.28546e-12	707Iso_Up	17.7863	6.78709	8.91646	31.8262	23.6153
FBgn0033521	CG12896	-1.34644	9.64268e-05	707Iso_Up	11.6138	5.01655	9.31275	16.8546	15.2712
FBgn0033481	CG12920	-6.76832	0.00148985	707Iso_Up	0.299434	0	0	0.463038	0.734698
FBgn0030829	CG12998	2.5218	0.0103994	707Grp_Up	1.58193	0.751141	4.75545	0.4013	0.419827
FBgn0030798	CG13003	-1.46447	2.18667e-07	707Iso_Up	14.4099	8.20889	8.32203	22.6889	18.4199
FBgn0030770	CG13010	-4.13591	0.0209953	707Iso_Up	0.276689	0.0268265	0.0396287	0.463038	0.577263
FBgn0036656	CG13026	-1.86448	0.00722863	707Iso_Up	2.2907	1.52911	0.515173	3.02518	4.09332
FBgn0036600	CG13043	6.04501	0.000183508	707Grp_Up	7.75717	3.46061	27.1853	0.277823	0.104957
FBgn0036599	CG13044	5.28721	1.89484e-12	707Grp_Up	5.15824	4.05079	16.1685	0.308692	0.104957
FBgn0040794	CG13056	3.38681	0.000135304	707Grp_Up	1.3578	1.34132	3.68547	0.246954	0.157435
FBgn0036606	CG13060	5.51127	0.0438604	707Grp_Up	0.198449	0.0804794	0.713317	0	0
FBgn0036601	CG13063	3.82522	0.0238115	707Grp_Up	0.470197	0.321917	1.46626	0.0926077	0
FBgn0036590	CG13065	7.5064	4.40309e-05	707Grp_Up	0.757222	1.12671	1.90218	0	0
FBgn0036589	CG13067	1.45631	0.00102865	707Grp_Up	4.11155	4.74828	7.68797	2.06824	1.9417
FBgn0032770	CG13086	-4.03586	2.59079e-21	707Iso_Up	7.25922	0.643835	1.26812	16.5768	10.5482
FBgn0032084	CG13101	-1.36218	0.000586457	707Iso_Up	4.5402	2.60217	2.8929	6.94558	5.72015
FBgn0032139	CG13116	-1.24509	1.04901e-05	707Iso_Up	15.0893	8.61129	10.5412	16.8546	24.35
FBgn0035643	CG13287	1.77541	0.0142494	707Grp_Up	1.25724	1.95833	2.02106	0.524777	0.524784
FBgn0035921	CG13305	-1.18829	6.80733e-05	707Iso_Up	12.7388	8.96004	7.52946	15.8359	18.6298
FBgn0040827	CG13315	-3.25304	1.05577e-24	707Iso_Up	225.769	31.8162	64.5948	478.257	328.41
FBgn0033856	CG13334	2.19776	0.0395314	707Grp_Up	0.696393	0.804794	1.54552	0.277823	0.157435
FBgn0025620	CG13360	-3.24009	6.61347e-29	707Iso_Up	21.1755	5.17751	3.52696	37.3209	38.6766
FBgn0014417	CG13397	-1.28028	1.11283e-05	707Iso_Up	12.9195	7.59189	8.67869	19.6637	15.7435
FBgn0040658	CG13516	-1.50723	0.00225604	707Iso_Up	3.11844	1.4218	2.13995	5.18603	3.72597
FBgn0034870	CG13559	-3.20034	0.000104669	707Iso_Up	1.14883	0.321917	0.158515	2.59301	1.52187
FBgn0039151	CG13607	-3.50469	1.45055e-35	707Iso_Up	59.3033	7.72602	13.8304	121.563	94.0938
FBgn0039239	CG13641	-4.70792	3.62359e-13	707Iso_Up	2.60627	0.134132	0.31703	6.14298	3.83093
FBgn0035873	CG13670	-1.21894	4.35024e-08	707Iso_Up	37.3726	22.2928	26.0757	53.6816	47.4405
FBgn0035553	CG13722	2.40394	0.0248477	707Grp_Up	1.60357	0.590182	4.95359	0.555646	0.314871
FBgn0033403	CG13739	1.12886	1.85458e-06	707Grp_Up	48.6718	65.081	72.362	23.5532	33.6912
FBgn0031936	CG13794	-2.10288	9.68479e-09	707Iso_Up	14.9768	6.11643	6.26134	30.684	16.8456
FBgn0031937	CG13795	-2.54501	4.80177e-10	707Iso_Up	12.3534	3.88984	4.08176	28.0601	13.382
FBgn0039040	CG13833	-3.22474	2.43759e-53	707Iso_Up	81.3476	14.8887	19.8936	154.531	136.077
FBgn0039028	CG13840	-1.3987	0.0012789	707Iso_Up	3.65193	2.3339	1.94181	5.03168	5.30032
FBgn0034501	CG13868	-1.16329	1.19345e-09	707Iso_Up	511.839	323.903	354.201	717.679	651.572
FBgn0035112	CG13877	-1.37023	1.29621e-05	707Iso_Up	8.18151	4.1581	5.74616	11.8538	10.968
FBgn0035186	CG13912	-3.73133	4.19496e-31	707Iso_Up	9.60286	1.12671	1.90218	18.2746	17.108
FBgn0032834	CG13965	-2.87435	3.37453e-05	707Iso_Up	1.70495	0.402397	0.515173	4.013	1.88922
FBgn0031700	CG14022	-1.14923	6.25774e-05	707Iso_Up	12.8537	7.26997	9.86755	14.7555	19.522
FBgn0036359	CG14105	-1.82817	5.49116e-07	707Iso_Up	5.33573	2.44121	2.65512	8.95208	7.2945
FBgn0031002	CG14196	-1.02951	5.40232e-05	707Iso_Up	16.0366	10.8111	11.7697	21.3615	20.2042
FBgn0039483	CG14259	-1.91751	4.57094e-10	707Iso_Up	19.7076	7.51141	10.6205	36.0861	24.6124
FBgn0038629	CG14304	1.55147	0.0397238	707Grp_Up	1.53482	1.44863	3.28918	0.771731	0.629741
FBgn0032896	CG14400	-3.49353	2.30233e-18	707Iso_Up	10.7274	1.39498	2.57587	24.6645	14.2741
FBgn0033464	CG1441	-2.53954	9.49239e-31	707Iso_Up	32.4702	8.98686	11.9679	56.5524	52.3735
FBgn0029898	CG14439	-1.42666	9.20137e-12	707Iso_Up	41.8633	21.7831	27.3042	61.0593	57.3064
FBgn0037191	CG14448	1.22194	0.0307832	707Grp_Up	3.91959	7.4041	3.80436	2.16085	2.30905
FBgn0034293	CG14495	-2.36893	7.98603e-05	707Iso_Up	2.90226	1.04623	1.03035	6.69862	2.83384
FBgn0037126	CG14567	-2.8645	3.92208e-21	707Iso_Up	21.5955	4.31906	7.33131	42.8774	31.8544
FBgn0037488	CG14607	-5.01143	0.0259258	707Iso_Up	0.237455	0.0268265	0	0.555646	0.367349
FBgn0031184	CG14615	-1.85819	0.000309642	707Iso_Up	4.96095	1.90468	2.85327	10.3103	4.77554
FBgn0040398	CG14629	-3.70398	5.45241e-41	707Iso_Up	195.034	22.8293	39.5495	414.852	302.906
FBgn0037222	CG14642	-2.11778	0.0412232	707Iso_Up	0.614826	0.160959	0.356658	1.04955	0.892133
FBgn0037288	CG14661	-1.45531	4.57443e-11	707Iso_Up	87.589	41.5273	60.1168	129.743	118.969
FBgn0030157	CG1468	-3.39864	1.96746e-36	707Iso_Up	67.7904	10.1941	16.0496	141.535	103.383
FBgn0037845	CG14694	-1.02707	0.00472518	707Iso_Up	9.56831	6.00913	7.60871	14.632	10.0234
FBgn0037988	CG14740	-3.61855	0.0315564	707Iso_Up	0.297288	0.0536529	0.0396287	0.308692	0.787176
FBgn0033307	CG14752	2.98723	0.0387989	707Grp_Up	0.871275	0.402397	2.77401	0.308692	0
FBgn0025383	CG14780	-4.1096	0.0323411	707Iso_Up	0.254967	0.0536529	0	0.493908	0.472306
FBgn0035734	CG14823	-1.54186	3.42898e-07	707Iso_Up	31.5451	17.8128	17.0403	54.8546	36.4725
FBgn0038447	CG14892	-1.40122	0.0254004	707Iso_Up	1.58084	0.938926	0.911461	2.0065	2.46649
FBgn0038455	CG14907	-1.64332	3.01345e-05	707Iso_Up	3.91627	1.95833	2.13995	5.74168	5.82511
FBgn0035439	CG14961	-3.63296	1.09012e-07	707Iso_Up	2.21246	0.134132	0.634059	3.14866	4.93297
FBgn0035548	CG15023	5.99039	0.0185547	707Grp_Up	0.277707	0.0804794	1.03035	0	0
FBgn0040699	CG15024	6.79861	0.00139359	707Grp_Up	0.479967	0.295091	1.62478	0	0
FBgn0030927	CG15046	-1.35869	0.000229551	707Iso_Up	5.57843	3.05822	3.7251	8.55078	6.97963
FBgn0034391	CG15080	1.63971	0.00292543	707Grp_Up	2.41774	2.87043	4.63656	0.956946	1.207
FBgn0034390	CG15093	-2.01299	1.01774e-07	707Iso_Up	16.8427	5.74086	9.07498	33.9253	18.6298
FBgn0034394	CG15096	-3.8557	7.93665e-62	707Iso_Up	119.118	14.3253	19.9729	247.479	194.695
FBgn0034398	CG15098	-1.15134	1.08207e-06	707Iso_Up	189.099	118.895	133.747	284.553	219.202
FBgn0030270	CG15199	-4.09274	1.45768e-19	707Iso_Up	4.58752	0.37557	0.792574	9.41511	7.76681
FBgn0030271	CG15202	-1.24509	6.89475e-07	707Iso_Up	16.4712	8.93321	12.166	22.0098	22.7756
FBgn0030261	CG15203	-1.44547	4.41814e-08	707Iso_Up	14.4352	7.69919	9.07498	21.9171	19.0497
FBgn0040850	CG15210	-1.31501	5.08429e-07	707Iso_Up	11.7271	6.86757	7.56909	15.8359	16.6357
FBgn0030156	CG15247	-1.32259	1.34673e-07	707Iso_Up	14.5507	7.8065	10.1053	18.9846	21.3062
FBgn0028526	CG15293	-4.13902	4.74694e-34	707Iso_Up	121.222	12.823	16.3667	306.871	148.829
FBgn0030040	CG15347	-2.32218	4.66793e-12	707Iso_Up	11.9303	3.32648	5.50839	22.5654	16.3208
FBgn0039827	CG1544	-2.69809	9.25815e-14	707Iso_Up	17.8921	4.45319	6.18208	39.5743	21.3587
FBgn0039817	CG15553	-1.06862	0.00294229	707Iso_Up	14.3811	11.1598	8.63906	21.8245	15.901
FBgn0034151	CG15617	-3.25213	0.0213407	707Iso_Up	0.419085	0.0268265	0.158515	0.493908	0.99709
FBgn0031630	CG15629	-1.75668	6.22435e-07	707Iso_Up	6.63125	3.59474	2.8929	10.4338	9.60355
FBgn0015336	CG15865	-2.63175	0.0132078	707Iso_Up	0.60475	0.107306	0.277401	1.14216	0.892133
FBgn0033798	CG15870	-2.94447	0.000104426	707Iso_Up	1.10594	0.214612	0.356658	2.06824	1.78427
FBgn0030218	CG1628	-2.74013	1.66308e-25	707Iso_Up	18.9363	5.15068	5.66691	36.117	28.8107
FBgn0031558	CG16704	-4.13858	8.76916e-21	707Iso_Up	9.31961	1.01941	1.22849	23.8002	11.2304
FBgn0031560	CG16713	-2.11191	9.44456e-08	707Iso_Up	5.93492	1.9315	3.01178	11.0821	7.71433
FBgn0030482	CG1673	-3.3544	7.38366e-33	707Iso_Up	64.956	13.1718	12.2453	141.258	93.1492
FBgn0032322	CG16743	-2.39519	8.54896e-20	707Iso_Up	27.3811	9.36243	9.74866	51.7368	38.6766
FBgn0029765	CG16756	-3.56452	7.71117e-37	707Iso_Up	30.7006	4.42636	6.26134	65.5662	46.5484
FBgn0035348	CG16758	-2.51447	7.86529e-12	707Iso_Up	140.915	40.3738	52.7458	325.176	145.365
FBgn0032835	CG16772	-2.98758	5.6955e-36	707Iso_Up	70.9867	15.2643	19.8936	141.103	107.686
FBgn0034538	CG16799	-1.51293	2.9497e-06	707Iso_Up	8.80802	5.01655	4.8347	14.0455	11.3353
FBgn0032495	CG16820	-1.35983	1.65058e-06	707Iso_Up	9.46986	5.12385	6.34059	13.2429	13.1721
FBgn0032533	CG16888	-5.28824	0.0120981	707Iso_Up	0.300852	0	0.0396287	0.586515	0.577263
FBgn0034480	CG16898	-5.63266	0.00779685	707Iso_Up	0.35553	0.0268265	0	1.08042	0.314871
FBgn0040732	CG16926	-4.71407	6.37305e-40	707Iso_Up	15.3091	1.28767	1.18886	35.9318	22.8281
FBgn0032387	CG16965	-3.94309	4.06148e-09	707Iso_Up	2.83858	0.348744	0.435916	7.84078	2.72888
FBgn0040972	CG16978	-1.55589	4.04467e-05	707Iso_Up	7.84665	2.92408	5.78579	10.1868	12.4899
FBgn0036547	CG17032	-1.47155	9.97372e-09	707Iso_Up	26.9255	13.6278	17.3574	42.8156	33.9011
FBgn0032281	CG17107	-1.75305	0.0146874	707Iso_Up	2.19821	0.858446	1.38701	4.8156	1.73179
FBgn0032285	CG17108	-2.95709	0.00217494	707Iso_Up	1431.93	419.941	296.938	3738.45	1272.39
FBgn0039942	CG17163	1.08206	0.000333618	707Grp_Up	23.9896	38.0131	29.0082	14.6629	14.2741
FBgn0039941	CG17167	-1.21759	0.0287225	707Iso_Up	2.79779	1.85103	1.78329	4.72299	2.83384
FBgn0039485	CG17189	-1.64401	0.000161045	707Iso_Up	8.50895	2.92408	6.22171	14.9716	9.91842
FBgn0038761	CG17190	-1.09021	0.00109002	707Iso_Up	7.9896	4.42636	6.618	10.6808	10.2333
FBgn0040571	CG17193	1.18826	2.65117e-06	707Grp_Up	78.7735	122.49	102.163	39.3274	51.114
FBgn0031489	CG17224	-1.77087	2.81796e-12	707Iso_Up	47.2902	19.0736	27.8194	79.2413	63.0266
FBgn0031490	CG17264	-1.61871	9.85772e-12	707Iso_Up	15.7717	7.75284	8.99572	23.0902	23.2479
FBgn0038829	CG17271	-1.01227	3.45327e-06	707Iso_Up	42.4572	27.5508	32.8522	57.2624	52.1636
FBgn0032029	CG17292	-1.23381	1.69906e-06	707Iso_Up	22.4222	13.3596	15.4948	33.4931	27.3413
FBgn0032774	CG17549	-1.0525	3.63517e-07	707Iso_Up	348.978	217.804	270.307	486.19	421.612
FBgn0032715	CG17597	-1.28289	3.09514e-05	707Iso_Up	18.155	8.96004	14.0682	27.8132	21.7785
FBgn0264494	CG17646	-1.4114	1.06808e-09	707Iso_Up	77.2088	39.3812	52.1118	119.68	97.6624
FBgn0033439	CG1773	-3.81842	1.39074e-09	707Iso_Up	1.96596	0.295091	0.277401	4.35256	2.93879
FBgn0039856	CG1774	-2.03376	7.52824e-11	707Iso_Up	21.616	8.77225	9.78829	41.6117	26.2917
FBgn0038547	CG17803	1.03351	0.000240342	707Grp_Up	18.5928	23.9024	27.542	9.2299	13.6969
FBgn0030163	CG1791	-1.66709	1.9099e-07	707Iso_Up	8.23439	3.72888	4.87433	13.3664	10.968
FBgn0037433	CG17919	-1.38422	5.3619e-08	707Iso_Up	43.5339	19.7174	32.6937	60.0098	61.7146
FBgn0032603	CG17928	-2.21777	9.07493e-18	707Iso_Up	35.8191	13.7083	13.9097	66.2762	49.3822
FBgn0034624	CG17974	-2.09511	0.00164726	707Iso_Up	1.41607	0.590182	0.554802	1.79042	2.72888
FBgn0032791	CG18094	-1.28203	0.0447312	707Iso_Up	1.80538	1.26084	0.990718	2.87084	2.09914
FBgn0037553	CG18249	-3.03043	5.92012e-16	707Iso_Up	8.98542	2.17294	2.13995	19.6637	11.9651
FBgn0033431	CG1827	-1.14551	0.0001557	707Iso_Up	16.3147	8.36985	13.6719	22.7506	20.4666
FBgn0032266	CG18302	-2.55122	1.04431e-12	707Iso_Up	9.60885	3.21917	2.8929	19.5711	12.7523
FBgn0033904	CG18327	-2.00487	0.00139407	707Iso_Up	1.4706	0.563356	0.713317	2.19171	2.41401
FBgn0033683	CG18343	-1.33674	2.25357e-05	707Iso_Up	7.58711	4.39954	4.87433	11.0512	10.0234
FBgn0037683	CG18473	-2.17448	2.16388e-07	707Iso_Up	4.2749	1.90468	1.38701	5.98863	7.81929
FBgn0037973	CG18547	-1.98749	9.88069e-07	707Iso_Up	15.8284	4.50684	9.70904	30.4679	18.6298
FBgn0032639	CG18563	-2.7331	0.0125277	707Iso_Up	0.54897	0.187785	0.118886	1.04955	0.839655
FBgn0030164	CG1889	-1.62667	7.65632e-10	707Iso_Up	16.4618	7.4041	10.145	25.8375	22.4608
FBgn0033214	CG1941	-1.26514	0.0245616	707Iso_Up	2.66384	1.36815	2.06069	4.44517	2.78136
FBgn0026563	CG1979	-3.77228	4.05382e-11	707Iso_Up	3.10321	0.402397	0.554802	7.6247	3.83093
FBgn0030060	CG2004	-1.32513	1.13141e-08	707Iso_Up	36.1639	18.9931	25.6794	52.9099	47.0732
FBgn0033204	CG2065	-1.84131	3.18183e-17	707Iso_Up	24.542	11.2939	11.849	37.6605	37.3646
[truncated: 988 more rows]

## Sheet: ShortSD_GrpOverlap
Group Housing Up
[truncated: 16 more rows]

## Sheet: ShortSD_IsoOverlap
Isolated Housing Up
[truncated: 217 more rows]

## Sheet: LongSD_GrpOverlap
Group Housing Up
[truncated: 74 more rows]

[truncated: 3 more sheets: LongSD_IsoOverlap, ShortSD&LongSD_GrpOverlap, ShortSD&LongSD_IsoOverlap]
